# Supplementary material for: A metabolome atlas of mouse brain on the global metabolic signature dynamics following short-term fasting
Source: Signal Transduct Target Ther. 2023 Sep 8;8:334. doi: 10.1038/s41392-023-01552-y (PMC10484938; doi:10.1038/s41392-023-01552-y)
Supplement: Supplementary file 2 — Dataset 1 [file 41392_2023_1552_MOESM2_ESM.xlsx]

## Sheet: Detalied qualitative informatio
	Supplementary Table 1. Detalied qualitative information of the identified metabolites in GC-MS analysis.
a: "1" indicates that the metabolites were confirmed by authentic chemical standards; "2" indicates that the metabolites were annotated based on commercial mass spectral libraries (Mainlib, NIST , replib and Fiehn) and a homemade metabolite library without confirmation using authentic chemical standards; "3" indicates that the metabolites were annotated only based on our homemade metabolite libra…
b: The similarity score cutoff value was > 600 for most of the compounds. Considering that co-efflux interference may reduce the qualitative similarity of some metabolites, several metabolites with similarity less than 600 were also retained for reference.
c: ygzh is a homemade GC-MS library.
d: The fatty acids detected by GC-MS is the total amount of free fatty acid and partial fatty acid chain of lipids.
Metabolite name	Chemical class	metabolic pathway	Identification levela	Retention time (minutes)	Retention Index	Characteristic ions (m/z)	Similarityb	Libraryc	Reverse	Probability
Hexanoic acidd	Fatty Acyls	Fatty acid metabolism	1	3.52	1069.3	173	762	replib	818	8548
Octanoic acid	Fatty Acyls	Fatty acid metabolism	2	9.9	2487.4	58	855	mainlib	884	6215
Nonanoic acid	Fatty Acyls	Fatty acid metabolism	1	5.02333	1355.2	215	905	mainlib	906	9677
Capric acid	Fatty Acyls	Fatty acid metabolism	1	5.47	1451.4	229	404	ygzh	467	9224
Myristic acid	Fatty Acyls	Fatty acid metabolism	1	7.18667	1842	285	658	replib	768	6573
Palmitic acid	Fatty Acyls	Fatty acid metabolism	1	8.04333	2039.6	313	944	fiehn	972	9704
cis-9-Hexadecenoic acid	Fatty Acyls	Fatty acid metabolism	3	7.97	2022.6	312	844
9-Hexadecenoic acid	Fatty Acyls	Fatty acid metabolism	2	11.8633	2989.1	311	693	mainlib	736	6695
Heptadecanoic acid	Fatty Acyls	Fatty acid metabolism	1	8.47	2139.1	327	734	mainlib	840	9140
Stearic acid	Fatty Acyls	Fatty acid metabolism	1	8.88667	2237.6	341	943	fiehn	975	9857
Trans-9-Octadecenoic acid	Fatty Acyls	Fatty acid metabolism	1	8.80667	2218.4	339	657	mainlib	803	1853
Oleic acid	Fatty Acyls	Fatty acid metabolism	1	8.81333	2220	344	855	fiehn	924	9875
linoleic acid	Fatty Acyls	Fatty acid metabolism	1	8.77	2209.6	337	518	mainlib	575	1812
11-Eicosenoic acid	Fatty Acyls	Fatty acid metabolism	1	9.60333	2412.7	367	783	ygzh	785	9547
Arachidonic acid	Fatty Acyls	Fatty acid metabolism	1	9.43333	2370.5	80	927	ygzh	928	8075
Docosanoic acid	Fatty Acyls	Fatty acid metabolism	1	10.4633	2633.9	397	669	mainlib	727	8863
cis-7,10,13,16-Docosatetraenoic acid	Fatty Acyls	Fatty acid metabolism	2	10.2167	2568.9	150	665	mainlib	684	2308
Tetracosanoic acid	Fatty Acyls	Fatty acid metabolism	2	11.2067	2831.2	425	516	mainlib	682	4221
Methyl stearate	Fatty Acyls	Not Available	2	8.41667	2126.6	87	367	mainlib	713	1440
Stearamide	Fatty Acyls	Not Available	2	9.69667	2436.2	369	794	mainlib	712	8774
MG(16:0/0:0/0:0)	Glycerolipids	Glycerolipid Metabolism	1	10.2367	2574.1	371	798	ygzh	877	9593
MG(0:0/16:0/0:0)	Glycerolipids	Glycerolipid Metabolism	2	10.1033	2539.6	218	785	mainlib	815	8935
MG(18:0/0:0/0:0)	Glycerolipids	Glycerolipid Metabolism	1	10.96	2767	399	924	ygzh	939	9696
MG(18:1(9Z)/0:0/0:0)	Glycerolipids	Glycerolipid Metabolism	2	10.7433	2708.9	103	634	replib	646	5283
2,3-dihydroxypyridine	Pyridines and derivatives	Not Available	2	5.13	1377.6	240	708	fiehn	778	6183
2-hydroxypyridine	Pyridines and derivatives	peptide synthesis	1	3.33333	1037	152	950	ygzh	950	9749
3-hydroxypyridine	Pyridines and derivatives	Not Available	1	3.92667	1141.8	152	816	fiehn	859	8867
D-lyxose	Carbohydrates and carbohydrate conjugates	Pentose and glucuronate interconversions	1	6.37	1654.9	307	845	fiehn	859	3881
Mannose	Carbohydrates and carbohydrate conjugates	Fructose and mannose metabolism	2	7.33667	1876.4	204	661	mainlib	706	969
L-Fucose	Carbohydrates and carbohydrate conjugates	Fructose and Mannose Degradation	1	6.61333	1710.6	117	405	replib	571	2707
Deoxyglucose	Carbohydrates and carbohydrate conjugates	Not Available	2	7.11333	1825.2	217	653	mainlib	833	1350
Ribose	Carbohydrates and carbohydrate conjugates	Pentose phosphate pathway	2	8.71	2195.3	227	616	mainlib	667	2235
N-Acetylneuraminic acid	Sugar acids and derivatives	Amino sugar and nucleotide sugar metabolism	1	10.3833	2612.4	246	821	ygzh	874	9071
Threonic acid	Sugar acids and derivatives	Ascorbate and aldarate metabolism	1	5.85667	1537.9	292	853	replib	905	9659
2-Keto-Gluconic acid	Sugar acids and derivatives	Not Available	2	6.82333	1758.8	292	560	ygzh	669	5230
lactobionic acid	Sugar acids and derivatives	Not Available	2	11.1333	2812.7	204	620	ygzh	687	3306
Sorbitol	Sugar alcohols	Fructose and mannose metabolism	1	7.53	1920.8	319	655	ygzh	682	3586
Ribitol	Sugar alcohols	Pentose and glucuronate interconversions	1	6.50333	1685.4	189	662	replib	766	4711
arabitol	Sugar alcohols	Pentose and glucuronate interconversions	2	6.59	1705.3	319	713	mainlib	670	2858
Threitol	Sugar alcohols	Not Available	2	5.63	1486.8	217	723	mainlib	815	2840
cholesterol	Steroids and steroid derivatives	Steroid hormone biosynthesis	1	12.84	3182.9	329	931	fiehn	945	9846
Scyllo-Inositol	Alcohols and polyols	Inositol phosphate metabolism	2	7.93333	2014	318	855	fiehn	863	9772
inositol	Alcohols and polyols	Inositol phosphate metabolism	1	8.23	2083	318	872	fiehn	894	9756
Inositol 4-Monophosphate	Alcohols and polyols	Inositol phosphate metabolism	1	9.57	2404.3	318	803	ygzh	955	9666
Lactic acid	Organic acids and derivatives	Glycolysis	1	3.43	1053.7	117	942
Pyruvic acid	Organic acids and derivatives	Glycolysis	1	3.36	1041.6	174	887	replib	903	9869
3-Phosphoglyceric acid	Organic acids and derivatives	Glycolysis,Glycerolipid Metabolism,Glycine and Serine Metabolism	1	6.93667	1784.8	357	714	fiehn	774	4560
Fructose-6-Phosphate	Organic acids and derivatives	Glycolysis	1	9.08	2283.9	459	630	ygzh	672	8261
Glucose-6-phosphate	Organic acids and derivatives	Glycolysis	1	9.1	2288.7	387	646	ygzh	664	8102
fructose	Carbohydrates and carbohydrate conjugates	Glycolysis	1	7.26333	1859.6	217	733	fiehn	762	6395
Glucose	Carbohydrates and carbohydrate conjugates	Glycolysis	1	7.34667	1878.6	319	826	replib	879	2574
2-Hydroxyglutaric acid	Organic acids and derivatives	TCA cycle	3	5.95	1559.1	198	519	mainlib	807	5544
citric acid	Organic acids and derivatives	TCA cycle	1	7.00333	1800.1	273	940	fiehn	974	9795
Fumaric acid	Organic acids and derivatives	TCA cycle	1	4.95	1339.8	245	939	ygzh	958	9716
Malic acid	Organic acids and derivatives	TCA cycle	1	5.56	1471.3	233	926	ygzh	930	9605
Succinic acid	Organic acids and derivatives	TCA cycle	1	4.77667	1303.5	247	806	mainlib	856	6130
Glyceric acid	Organic acids and derivatives	Glycerolipid Metabolism,Glycine and Serine Metabolism	1	4.9	1329.4	292	508	fiehn	716	9372
Glycerol	sugar alcohols	Glycerolipid Metabolism	1	4.55333	1259.7	205	745	fiehn	783	9476
Glycerol 2-Phosphate	Glycerophosphates	Glycerolipid Metabolism	1	6.57667	1702.2	243	662	fiehn	707	9636
Glycerol-3-Phosphate	Glycerophosphates	Glycerolipid Metabolism	1	6.73667	1738.9	357	945	fiehn	953	9640
Glycerophosphoric acid	Organic acids and derivatives	Glycerolipid Metabolism	2	8.58	2164.9	357	673	fiehn	724	8434
L-Ascorbic acid	vitamin	Ascorbate and aldarate metabolism	2	7.58667	1933.9	332	886	mainlib	890	9829
α-Tocopherol	vitamin	Ubiquinone and other terpenoid-quinone biosynthesis,Vitamin digestion and absorption	1	12.6567	3149.1	502	826	mainlib	878	8245
Pantothenic acid	vitamin	Pantothenate and CoA biosynthesis, Beta-Alanine Metabolism	1	7.79	1980.8	291	874	fiehn	899	9657
3-Hydroxymethylglutaric acid	Organic acids and derivatives	Nicotinate and nicotinamide metabolism	2	6.07667	1587.9	231	670	fiehn	806	9284
Nicotinamide	Amines	Nicotinate and Nicotinamide Metabolism	2	5.64	1489	179	910	fiehn	943	5043
O-Phosphoethanolamine	Amines	Phospholipid Biosynthesis	1	6.88	1771.8	328	882	replib	889	9837
Palmitoylethanolamide	Amines	Not Available	2	8.50333	2146.9	85	568	mainlib	826	5570
O-phosphocolamine	Amines	Sphingolipid Metabolism	2	6.87333	1770.3	216	616	fiehn	670	8072
β-Alanine	Amino acids, peptides, and analogues	beta-Alanine metabolism	1	5.33333	1421.3	248	855	mainlib	863	9865
Alanine	Amino acids, peptides, and analogues	Alanine metabolism, urea cycle	1	3.67333	1095.9	116	935	fiehn	968	9691
Pyrophosphate	Organic acids and derivatives	Alanine Metabolism	1	6.32333	1644.2	451	820	fiehn	907	9415
N-Acetylaspartylglutamic acid	Amino acids, peptides, and analogues	Alanine, aspartate and glutamate metabolism	2	9.97333	2506	174	856	mainlib	910	9600
Proline	Amino acids, peptides, and analogues	Arginine and proline metabolism	1	6.02667	1576.5	142	502	mainlib	652	1896
Aspartic acid	Amino acids, peptides, and analogues	Arginine and Proline Metabolism, Aspartate Metabolism	1	5.71333	1505.3	232	947	ygzh	947	9694
Citrulline	Amino acids, peptides, and analogues	Arginine and Proline Metabolism	1	7.05	1810.8	256	404	fiehn	526	8610
Creatinine	Organic acids and derivatives	Arginine and proline metabolism	1	5.92333	1553	329	881	mainlib	884	4649
N-acetyl-L-aspartic acid	Amino acids, peptides, and analogues	Aspartate Metabolism	1	6.33	1645.8	158	943	fiehn	965	9625
Asparagine	Amino acids, peptides, and analogues	Aspartate Metabolism, Protein digestion and absorption	1	4.03	1160.5	216	834	fiehn	866	9611
Ornithine	Amino acids, peptides, and analogues	Arginine and ornithine metabolism	1	7.03333	1806.9	142	531	replib	683	3153
γ-aminobutyric acid(not sure)	Amino acids, peptides, and analogues	GABAergic synapse, Glutamate Metabolism	2	5.79667	1524.2	304	735	ygzh	740	8576
γ-aminobutyric acid	Amino acids, peptides, and analogues	GABAergic synapse, Glutamate Metabolism	2	7.16667	1837.5	259	608	mainlib	720	4352
Glutamic acid	Amino acids, peptides, and analogues	Glutamine and glutamate metabolism	1	6.15	1604.6	246/128/257	947	ygzh	947	9764
Glutamine	Amino acids, peptides, and analogues	Glutamine and glutamate metabolism	1	6.83333	1761.1	156	875	ygzh	885	9830
Glutathione	Amino acids, peptides, and analogues	Glutathione metabolism	2	8.56667	2161.7	213	689	fiehn	834	9601
Pyroglutamic acid	Amino acids, peptides, and analogues	Glutathione Metabolism	1	5.77333	1518.9	156	946	fiehn	981	7811
Cysteine	Amino acids, peptides, and analogues	Cysteine and methionine metabolism, Glutathione Metabolism	1	5.89333	1546.2	220	875	mainlib	895	5934
Homocysteine	Amino acids, peptides, and analogues	Cysteine and methionine metabolism, Sulfur metabolism	2	5.20667	1393.6	234	846	mainlib	879	9722
Methionine	Amino acids, peptides, and analogues	Cysteine and methionine metabolism	1	5.75	1513.6	176	616	mainlib	734	9080
O-succinylhomoserine	Amino acids, peptides, and analogues	Cysteine and methionine metabolism	2	6.15667	1606.1	199	656	fiehn	706	5674
5'-methylthioadenosine	Nucleosides, nucleotides, and analogues	Cysteine and methionine metabolism	2	11.05	2791.2	236	457	fiehn	649	9434
Isoleucine	Amino acids, peptides, and analogues	Valine, leucine and isoleucine degradation,Valine, leucine and isoleucine biosynthesis	1	4.68333	1285.1	158	536	fiehn	825	5040
Leucine	Amino acids, peptides, and analogues	Valine, leucine and isoleucine degradation,Valine, leucine and isoleucine biosynthesis	1	4.57667	1264.3	158	524	replib	795	3943
Valine	Amino acids, peptides, and analogues	Valine, leucine and isoleucine degradation,Valine, leucine and isoleucine biosynthesis	1	4.29	1208.4	144	813	fiehn	933	5206
Lysine	Amino acids, peptides, and analogues	Lysine degradation, Lysine biosynthesis	1	7.49	1911.5	156	680	fiehn	848	9670
2-Aminoadipic acid	Amino acids, peptides, and analogues	Lysine Degradation	1	6.56333	1699.2	260	649	ygzh	755	3151
N-Acetyl-lysine	Amino acids, peptides, and analogues	Lysine degradation	2	8.51333	2149.3	174	524	replib	875	3218
Pipecolic acid	Amino acids, peptides, and analogues	Lysine degradation	1	5.78667	1522	84	681	ygzh	735	9888
Glycine	Amino acids, peptides, and analogues	Glycine, serine and threonine metabolism, Primary bile acid biosynthesis	1	4.77	1302.1	174	844	fiehn	857	7903
Threonine	Amino acids, peptides, and analogues	Glycine, serine and threonine metabolism	1	5.10667	1372.7	218	941	replib	942	9833
Sarcosine	Amino acids, peptides, and analogues	Glycine and Serine Metabolism, Methionine Metabolism	1	3.66667	1094.7	154	704	fiehn	785	9064
Serine	Amino acids, peptides, and analogues	Glycine, serine and threonine metabolism	1	4.98333	1346.8	204	945	fiehn	958	9694
Tyrosine	Amino acids, peptides, and analogues	Tyrosine metabolism	1	7.38667	1887.8	179	711	fiehn	819	8708
Phenylalanine	Amino acids, peptides, and analogues	Phenylalanine metabolism	1	6.24333	1625.9	192	810	mainlib	845	7658
Mimosine	Amino acids, peptides, and analogues	Not Available	1	4.18	1187.8	188	921	fiehn	943	9850
Hypotaurine	Organic acids and derivatives	Taurine and Hypotaurine Metabolism, Bile Acid Biosynthesis	1	6.12667	1599.2	188	654	ygzh	714	9241
Taurine	Organic acids and derivatives	Taurine and Hypotaurine Metabolism	1	6.42	1666.4	326	916	mainlib	917	9837
Uracil	Pyrimidines and pyrimidine derivatives	Pyrimidine Metabolism, Beta-Alanine Metabolism	2	4.91	1331.4	99	730	fiehn	889	9854
Urea	Organic acids and derivatives	Pyrimidine metabolism, Arginine biosynthesis, urea cycle	1	4.43667	1237	189	953	fiehn	974	9777
Uridine	Pyrimidines and pyrimidine derivatives	Pyrimidine metabolism	1	9.74	2447.1	217	892	mainlib	892	9115
Uridine 5'-monophosphate	Pyrimidines and pyrimidine derivatives	Pyrimidine Metabolism,Lactose Synthesis	2	11.38	2874.8	315	768	fiehn	809	8919
Xanthine	Purines and purine derivatives	Purine metabolism, Caffeine metabolism	1	7.9	2006.3	353	744	mainlib	790	5866
Xanthosine	Purines and purine derivatives	Purine metabolism, Caffeine metabolism	2	10.54	2654.4	325	319	replib	437	5816
Oxalic acid	Organic acids and derivatives	Purine metabolism	1	4.55	1259.1	201	664	ygzh	713	6575
Hypoxanthine	Organic acids and derivatives	Purine metabolism	1	7.03	1806.2	265	887	replib	901	9839
Inosine	Purines and purine derivatives	Purine metabolism	1	10.1833	2560.3	230	872	fiehn	954	9831
Guanosine	Purines and purine derivatives	Purine metabolism	2	10.9033	2751.8	324	844	fiehn	875	9816
adenine	Purines and purine derivatives	Purine metabolism	1	7.31333	1871	264	803	fiehn	890	9838
adenosine	Purines and purine derivatives	Purine metabolism	1	10.4333	2625.8	236	946	fiehn	973	9876
adenosine-5-monophosphate	Purines and purine derivatives	Purine metabolism, urea cycle	1	12.1533	3050.7	315	806	ygzh	820	9310
2-Hydroxybutyric acid	Organic acids and derivatives	Propanoate Metabolism	1	3.8	1118.7	131	764	mainlib	800	3803
Aminomalonic acid	Organic acids and derivatives	Not Available	1	5.50667	1459.5	234	644	mainlib	725	8063
Decanedioic acid	Organic acids and derivatives	Not Available	2	5.21333	1395	373	715	mainlib	747	5964
dihydroxyacetone phosphate	Organic acids and derivatives	Not Available	2	6.67	1723.6	315	785	fiehn	821	9823
methylphosphate	Organic acids and derivatives	Not Available	1	4.08	1169.6	241	949	ygzh	949	9878
Iminodiacetic acid	Organic acids and derivatives	Not Available	2	5.51333	1461	232	513	mainlib	640	4960

## Sheet: GC-MS Raw data
Supplementary Table 2. Raw data of GC-MS.
Ctrl: mice fed ad libitum			BST: brainstem	HYT: hypothalamus
F-3h: mice subjected to 3 h of fasting			CBL: cerebellum	OB: olfactory bulb
F-6h: mice subjected to 6 h of fasting			COR: cerebral cortex	SC: spinal cord
F-12h: mice subjected to 12 h of fasting			HIP: hippocampus	QC: quality control
F-24h: mice subjected to 24 h of fasting
				BST																					CBL																	COR
			Raw data name	48-bs-c	50-bs-c	51-bs-c	52-bs-c	40-bs-3h	41-bs-3h	42-bs-3h	43-bs-3h	44-bs-3h	20-bs-6h	21-bs-6h	45-bs-6h	46-bs-6h	47-bs-6h	58-bs-12h	59-bs-12h	60-bs-12h	61-bs-12h	53-bs-24h	54-bs-24h	57-bs-24h	48-cb-c	49-cb-c	51-cb-c	52-cb-c	40-cb-3h	43-cb-3h	44-cb-3h	20-cb-6h	46-cb-6h	59-cb-12h	60-cb-12h	61-cb-12h	53-cb-24h	54-cb-24h	56-cb-24h	57-cb-24h	58-cb-24h	48-cor-c	49-cor-c	50-cor-c	52-cor-c	40-cor-3h	42-cor-3h	20-cor-6h	21-cor-6h
abbreviation of metabolite	metabolic pathway	chemical class	metabolite name	Ctrl-1	Ctrl-2	Ctrl-3	Ctrl-4	F-3h-1	F-3h-2	F-3h-3	F-3h-4	F-3h-5	F-6h-1	F-6h-2	F-6h-3	F-6h-4	F-6h-5	F-12h-1	F-12h-2	F-12h-3	F-12h-4	F-24h-1	F-24h-2	F-24h-3	Ctrl-1	Ctrl-2	Ctrl-3	Ctrl-4	F-3h-1	F-3h-2	F-3h-3	F-6h-1	F-6h-2	F-12h-1	F-12h-2	F-12h-3	F-24h-1	F-24h-2	F-24h-3	F-24h-4	F-24h-5	Ctrl-1	Ctrl-2	Ctrl-3	Ctrl-4	F-3h-1	F-3h-2	F-6h-1	F-6h-2
FFA C6:0	Fatty acid metabolism	Fatty Acyls	Hexanoic acid	5991	5040	4079	4743	4843	6384	6483	6074	3771	7344	4345	4292	5508	4945	5608	5395	5633	4767	4618	5651	6200	5959	5388	6971	4792	5432	5050	4541	7450	6283	6910	7145	5328	4483	5295	5604	4660	8159	5582	4599	6543	5839	5891	4757	6654	6359
FFA C8:0	Fatty acid metabolism	Fatty Acyls	Octanoic acid	121682	79020	113768	205517	126078	88565	130767	153002	98590	169760	183552	116031	216749	159344	126344	162323	159967	173624	159485	155413	144270	115594	148952	176736	235188	148229	217584	207233	264607	195559	178497	98848	208664	189534	125640	98564	186729	152666	193226	169439	132476	115510	81584	138870	45146	94808
FFA C9:0	Fatty acid metabolism	Fatty Acyls	Nonanoic acid	16365	17687	20868	19921	14534	25097	26829	17257	21171	26762	21664	19512	19207	25279	19638	22178	12300	17677	20665	12737	21740	22577	19720	14450	17338	17402	23923	23190	21770	18309	15587	19932	29569	18631	19332	22168	17036	15902	15376	16811	15780	19047	19925	21347	19279	20707
FFA C10:0	Fatty acid metabolism	Fatty Acyls	Capric acid	2567	1966	2143	2512	2529	2379	2147	2097	2633	2709	2687	2516	2458	2868	2483	2833	2231	2432	2541	2032	2461	2527	3136	2435	2674	3311	2684	2613	2180	2237	3137	2459	2697	2530	2191	2389	2082	2874	2324	2552	2663	2700	2529	2440	2572	2195
FFA C14:0	Fatty acid metabolism	Fatty Acyls	Myristic acid	10770	13099	14488	15274	10770	16986	9159	17459	11399	13357	15652	14086	14287	17137	9318	15696	17397	22691	15747	13963	16496	15392	14097	11430	16532	13199	15334	16869	14363	15056	13747	14641	12655	15828	11061	13138	12117	13110	13121	16056	12798	13181	17903	13878	16759	16823
FFA C16:0	Fatty acid metabolism	Fatty Acyls	Palmitic acid	619512	714013	1138994	1092764	600828	774673	606428	830429	700956	877258	1095445	730796	726963	1222853	549230	641191	696715	662428	913741	668363	1223747	841549	719849	667338	1187942	719721	1141100	1191297	929258	752127	682519	970866	776307	973647	721399	752478	735821	712778	849699	1083868	789474	897479	1492452	1034425	1366857	1372312
FFA C16:1	Fatty acid metabolism	Fatty Acyls	cis-9-Hexadecenoic acid	1588	1652	2971	2066	4372	1634	1506	2830	1182	2902	2447	1673	2932	2707	1333	1723	2133	4567	1312	2961	3130	2866	2578	2022	2135	1397	2039	2745	2058	7971	3240	2337	1399	2256	1567	1560	2320	1265	2620	2469	3148	1988	4835	2000	5164	4684
FFA C16:1	Fatty acid metabolism	Fatty Acyls	9-Hexadecenoic acid	101211	158978	104930	55819	143367	87003	68316	98682	60894	120610	131306	106900	113165	75520	93538	52655	83430	135805	103616	146168	214149	115873	149626	103225	118034	89899	84799	59055	135495	119178	99819	112047	164887	87263	96680	106965	190682	119002	68800	53778	230773	80311	108990	88074	114536	97972
FFA C17:0	Fatty acid metabolism	Fatty Acyls	Heptadecanoic acid	5812	6127	10141	9035	6094	5998	5729	6833	6503	8268	8499	7050	6862	9554	5604	5333	5724	6071	6597	5724	9901	7620	6549	6498	9777	6001	8672	8990	8175	6536	6963	8166	7558	7444	6114	7108	6567	6006	6509	7502	5358	6534	9769	6752	9737	9850
FFA C18:0	Fatty acid metabolism	Fatty Acyls	Stearic acid	677324	772224	1164873	1080109	631779	755432	658534	882143	717794	893816	1076203	745068	739450	1120749	594876	674029	697860	711174	904957	694692	1169701	1008865	884940	802626	1308012	827915	1243442	1245979	1054410	865839	890762	1048076	988456	1082526	895362	841549	866691	870256	984358	1105730	949394	1023312	1352787	1078082	1243595	1303469
FFA C18:1	Fatty acid metabolism	Fatty Acyls	Trans-9-Octadecenoic acid	104763	120383	122518	101928	87964	103311	103359	110608	117673	136959	116584	116970	107785	131052	64756	99909	101824	104906	82639	99135	186132	61146	66698	67690	110148	61815	98978	122746	95394	100185	68839	149249	94507	75673	65405	111049	87539	65370	74218	63124	64177	75722	176266	75326	142969	159594
FFA C18:1	Fatty acid metabolism	Fatty Acyls	Oleic acid	7929	8900	8826	10551	8072	7193	8154	8799	8482	9877	8874	7456	8959	10286	8597	10690	11023	11780	7930	9038	9656	7897	9163	11366	10112	9632	10343	8936	11809	10752	10525	10005	13951	8498	9075	7172	10398	10169	9209	8014	7669	6390	7253	8197	4456	8443
FFA C18:2	Fatty acid metabolism	Fatty Acyls	linoleic acid	6954	7146	9402	10641	5001	5738	7225	7305	6344	10578	12468	10221	10564	22646	5634	7408	9559	8183	10500	8788	15345	8945	8943	8582	12405	7140	11897	13265	14227	11247	13251	18008	12128	16278	14987	14607	12684	11402	7209	11615	8391	8504	14086	6215	18048	16584
FFA C20:1	Fatty acid metabolism	Fatty Acyls	11-Eicosenoic acid	16298	21465	19757	24400	16094	17825	16021	20421	20312	24552	25335	20080	19147	26476	14067	17925	18786	17988	16009	15898	29309	12983	14371	12496	21982	13143	19805	23196	18166	15574	19606	22465	18158	15060	13525	19742	18319	12193	10911	8420	6054	9833	12530	8320	13390	11788
FFA C20:4	Fatty acid metabolism	Fatty Acyls	Arachidonic acid	125853	137744	162138	166185	103819	140049	137650	203575	131719	164055	185928	174805	187686	144003	90892	113434	127311	124652	148216	150408	208715	169617	211907	169653	215224	198342	187569	273172	241144	206645	199334	234975	172678	203444	190966	231191	195453	160265	287022	297123	242088	311892	457039	203782	395455	430453
FFA C22:0	Fatty acid metabolism	Fatty Acyls	Docosanoic acid	2104	2326	3502	4272	2197	1946	1987	2731	2021	3126	3190	2124	2370	7489	2409	2889	3171	2683	2014	2266	3788	1803	1395	1672	2874	1375	3272	2997	1949	1847	2741	2234	2346	1862	1568	1925	1799	1252	1473	1763	1173	1356	1430	1534	2150	1330
FFA C22:4	Fatty acid metabolism	Fatty Acyls	cis-7,10,13,16-Docosatetraenoic acid	8334	10813	12071	9781	6791	8869	8221	9489	9746	11274	10550	8646	8777	9797	7472	6975	7500	7670	8008	7301	12997	5724	5747	5144	8544	5327	7746	9221	7691	6647	6302	9210	6657	7016	5985	8126	6839	6068	6780	6810	6830	9576	16515	6042	18208	14842
FFA C24:0	Fatty acid metabolism	Fatty Acyls	Tetracosanoic acid	951	1528	1443	2723	1357	1062	1024	1710	1305	2299	2130	1316	1457	5297	1431	1839	1943	1941	1012	1557	2650	1195	99	976	1377	1279	2025	1711	1094	1141	1578	1168	1639	922	872	1900	1481	1024	976	855	700	1054	895	989	1031	1114
	Not Available	Fatty Acyls	Methyl stearate	2950	3109	2394	2465	4357	3013	4507	4494	3033	4057	3345	4501	5293	2710	3939	5015	4687	3977	2937	3524	2856	11482	7569	6238	3375	5348	4191	3717	9214	7160	8448	6871	5383	4077	4896	5154	6437	9300	7428	3824	6537	5784	7167	5314	6227	8064
	Not Available	Fatty Acyls	Stearamide	6738	8403	10497	11995	7297	7299	7209	10261	8308	10182	11053	7996	7873	14120	7220	8531	8511	8027	9562	7868	12452	8171	6025	5879	11188	5819	10555	9824	7861	7170	7475	7095	7709	8550	6094	6423	6854	6384	6973	7021	5557	6292	6660	7043	6768	6626
	Glycerolipid Metabolism	Glycerolipids	MG(16:0/0:0/0:0)	24252	22898	24698	22491	16865	22931	21944	32055	21538	28056	27080	32987	39215	35163	14386	25544	25816	32705	28531	22941	30278	44895	55848	28537	31629	51400	31805	30551	59209	46439	51404	66982	45274	39659	50161	36592	42379	45464	53647	43875	42594	47499	134803	35646	121344	109216
	Glycerolipid Metabolism	Glycerolipids	MG(0:0/16:0/0:0)	5327	8883	9712	9723	5961	9209	8741	15908	12497	11383	11055	15376	14253	13963	4711	4895	10373	8581	6872	7532	13026	13106	15287	10595	10808	11945	16219	23844	11782	11938	11765	16158	11182	9837	14533	14735	14022	9234	22397	17834	16553	23884	31917	15309	31066	28973
	Glycerolipid Metabolism	Glycerolipids	MG(18:0/0:0/0:0)	17272	23050	20237	18790	16039	18430	16249	23168	18060	19998	18155	19929	21490	22937	16683	19218	21045	22166	20166	21050	22304	29928	32890	23443	27133	32158	26511	23072	29520	28471	37141	46496	28214	32692	27494	34269	24165	29294	29553	27025	26784	32363	88184	23916	85074	61683
	Glycerolipid Metabolism	Glycerolipids	MG(18:1(9Z)/0:0/0:0)	21504	31300	40807	50901	25572	53737	47907	80880	47432	45112	55503	69616	60020	47446	24665	23303	48450	38047	30221	40979	69224	26744	24750	22842	25726	18764	25602	47137	18311	33496	19388	26646	30482	20144	19390	32758	38537	11672	26678	23389	15945	25370	35498	27224	36758	28062
	Not Available	Pyridines and derivatives	2,3-dihydroxypyridine	15141	15624	14037	13142	16436	18480	15447	18623	13262	13059	14903	15016	19248	13571	13548	17587	16691	16693	16382	16343	15915	23132	22211	21083	19400	24656	19564	17474	22404	19951	22674	22314	19557	20559	20355	20666	20627	22204	21381	19554	20133	18604	19057	17451	16621	20776
	peptide synthesis	Pyridines and derivatives	2-hydroxypyridine	504656	491721	589212	529557	491236	550966	502111	559171	436510	470704	612068	504700	612896	497994	425346	544866	537270	524251	564130	499942	620430	763767	712634	682124	814291	771740	756776	696660	750401	635101	751514	718297	702282	729136	669573	675389	672393	700228	676876	663168	595982	566256	671661	624435	518769	732118
	Not Available	Pyridines and derivatives	3-hydroxypyridine	35150	32345	36483	32005	41236	44814	33680	41669	28266	32006	35995	29125	46441	33416	30437	37776	36811	37716	31349	34988	35662	55041	42317	45957	44493	57367	41853	39757	45539	39090	50102	45839	42378	38864	37364	42392	42764	48504	51857	40825	52008	36070	46370	34895	36446	47783
	Pentose and glucuronate interconversions	Carbohydrates and carbohydrate conjugates	D-lyxose	15298	12474	12315	16835	13891	14935	18169	25737	14196	26818	15661	19653	26902	16864	8808	13016	15589	15509	36574	22400	24629	14266	9821	13131	11189	10270	11780	15799	16716	18648	15550	9627	15434	31698	13481	17335	13011	8854	14827	12933	8638	10693	17255	15114	26185	19963
	Fructose and mannose metabolism	Carbohydrates and carbohydrate conjugates	Mannose	15638	13262	14958	13950	11756	18631	15235	20327	12875	13057	13946	16142	24467	14432	13118	13443	10657	17038	16286	17778	17524	18601	19095	19639	24400	20633	22686	19943	18388	24721	16826	13718	17540	17224	19052	18293	18301	18126	17426	22953	20940	18441	24235	15131	13623	18898
	Fructose and Mannose Degradation	Carbohydrates and carbohydrate conjugates	L-Fucose	7158	13433	17918	11734	12163	7967	6550	18297	5431	19581	19325	9377	17719	5811	4838	6698	6554	7756	20565	15421	11065	5703	5712	9224	9412	11786	10597	6748	16987	12721	6852	6862	5725	18886	9630	6545	7687	3530	6044	6706	8627	8468	15861	6196	12431	14887
	Not Available	Carbohydrates and carbohydrate conjugates	Deoxyglucose	12387	11475	13959	9379	8982	12143	11833	13249	10157	12566	12951	12464	15700	9539	10009	12081	11948	13771	13827	14190	15345	15838	15748	16750	14406	15980	15780	17831	19020	16090	16326	16103	14406	17560	17554	16940	17958	15220	17075	17268	14999	13998	19526	14564	13787	21490
	Pentose phosphate pathway	Carbohydrates and carbohydrate conjugates	Ribose	71634	73825	63139	64070	61943	63384	68446	65834	63732	68687	58959	58064	69728	57587	77102	81491	84575	87002	63839	78683	63503	82760	98732	89352	74993	89309	73095	67576	79531	88625	122304	105853	86541	84107	85995	80934	72919	104380	70254	60110	79979	73236	70661	63324	75970	93487
	Amino sugar and nucleotide sugar metabolism	Sugar acids and derivatives	N-Acetylneuraminic acid	35294	33176	41345	27914	25708	36102	36188	55284	31447	34918	43958	36454	39786	25734	25316	39694	35529	38947	42631	39677	42186	28438	26306	22627	23973	26822	25752	27346	30283	24639	27130	26818	22291	32956	26969	32771	34599	19422	47533	49629	38525	37382	51999	38732	35340	58187
	Ascorbate and aldarate metabolism	Sugar acids and derivatives	Threonic acid	8044	6470	8354	6849	6537	8509	10846	10876	8488	9920	10306	11703	13288	10990	5662	6953	6956	6897	8229	9278	10853	13667	12154	10286	9435	12289	15183	13043	18036	15891	12063	13727	12623	18387	10656	11634	10029	10933	12602	12012	8530	11375	16081	14556	13154	18945
	Not Available	Sugar acids and derivatives	2-Keto-Gluconic acid	4337	3632	3897	2988	3791	3571	4493	3845	3107	4149	4607	4472	5536	3600	3563	3203	3688	3908	3305	3933	6178	6691	6669	4903	6611	5644	6596	6971	7481	6588	6086	5862	5665	6292	5529	4809	6416	5251	3836	4197	4482	5361	4849	4800	3610	5549
	Not Available	Sugar acids and derivatives	lactobionic acid	84841	70908	90712	72393	62544	47495	73934	79020	70674	70249	66520	60849	76878	66907	77168	70528	88517	83314	77082	98018	66161	64453	61189	78049	54006	75111	59510	54823	61045	75117	69767	55519	61985	53336	64986	68692	58972	67802	58776	47227	66474	52388	61407	58643	62682	43495
	Fructose and mannose metabolism	Sugar alcohols	Sorbitol	15220	15061	16182	9539	10928	15868	16944	19588	15115	11613	14390	15227	21679	14342	6514	7455	9228	10705	11048	9821	12840	22025	25215	19443	15742	19517	23619	26920	19437	21913	11328	14118	13366	14989	15442	11640	14419	12660	24385	27435	22460	15082	22521	20155	12132	27916
	Pentose and glucuronate interconversions	Sugar alcohols	Ribitol	6384	6770	7893	6449	4862	7965	5820	8274	5759	5497	7056	6921	9868	4958	4218	8229	8073	8101	9234	7610	7266	13564	16537	13984	12726	17865	12716	14463	16201	13298	14980	16154	13348	14282	15988	13866	13029	14116	15630	17171	12428	12997	14280	12635	9460	16603
	Pentose and glucuronate interconversions	Sugar alcohols	arabitol	1336	1024	1226	1006	1194	1371	1052	1230	910	1310	1224	1295	1735	816	1077	1070	1263	1272	1448	1220	1626	1835	1739	1624	1738	2622	1670	2091	2045	1797	1939	1779	1529	2241	2102	1496	1804	1606	2838	2239	2466	1843	3136	2318	1829	3424
	Not Available	Sugar alcohols	Threitol	5389	5046	6771	4169	4210	5631	5267	6988	4514	5071	6998	4740	6971	4425	4055	4357	5139	5357	4679	4625	6260	6219	6829	5540	6302	7229	6729	8521	7440	6759	5392	6842	5441	6473	5862	4661	6135	5253	7348	10548	8293	7351	10344	8284	7736	12441
	Steroid hormone biosynthesis	Steroids and steroid derivatives	cholesterol	1578875	1522228	1669012	1767166	1584333	1563486	1558425	1584852	1514139	1737040	1748136	1523938	1582248	1703562	1718893	1824091	1854403	1814212	1529788	1602348	1707551	1644692	1706201	1723793	1771487	1764387	1763485	1715557	1798126	1616568	2314087	1870851	1951107	1701488	1496653	1446473	1603859	2006542	1667633	1561261	1680596	1726667	1656128	1578685	1513019	1723695
	Inositol phosphate metabolism	Alcohols and polyols	Scyllo-Inositol	170638	134720	96975	131536	117487	149654	173162	152029	90144	158962	180010	181961	187619	99638	117595	163033	158186	173715	185668	166994	212384	187677	184910	92896	174359	182276	137316	146954	198188	172837	178269	196940	173472	184134	174545	183429	199600	142207	157188	129204	86089	108207	149180	93057	104827	163376
	Inositol phosphate metabolism	Alcohols and polyols	inositol	2128069	2133031	2021621	2084298	1976227	2287493	2230195	2406372	2002755	2207939	2420452	2205542	2358935	2114518	1849531	2312876	2273919	2317848	2422718	2343551	2591728	2273235	2275269	1856960	2261429	2239767	2205137	2310175	2344693	2228980	2189160	2121612	2090157	2310294	2162028	2276321	2345583	2036515	2278721	2095312	1865482	2004492	2126772	1773231	1905027	2182414
	Inositol phosphate metabolism	Alcohols and polyols	Inositol 4-Monophosphate	142939	148673	179157	151831	160857	147206	148036	163209	174092	231276	161466	144845	154790	144559	148845	158838	177228	173104	131238	188316	178339	158871	176799	175347	143242	178107	167486	165219	180552	172927	213735	160533	185667	139834	157880	123539	158218	171374	184701	150040	170245	161126	176631	142739	128112	198538
	Glycolysis	Organic acids and derivatives	Lactic acid	7021589	5558387	6823304	5221124	4843220	7338647	6736613	7227637	6393342	4787511	6538890	6743894	7495647	5621325	4782557	5419128	5216958	6181505	6052502	6393446	7289390	7322966	6433736	5976937	5911490	6330235	7568134	9062060	5259309	6372993	5449574	5510860	5473738	5692032	5959270	5859182	6461890	5349630	6898808	7669675	6037491	6320686	7292655	7307992	5510580	7559763
	Glycolysis	Organic acids and derivatives	Pyruvic acid	6064	4402	6770	4358	3290	3411	3463	5797	3137	4899	5207	4656	6130	4880	3119	4240	4711	4703	7939	5324	8825	9066	7462	8886	7304	7165	10804	9842	5912	6383	7775	5266	6401	8692	6093	6521	7207	8486	8861	12605	5448	7075	8594	6219	11785	9012
3-PG	Glycolysis,Glycerolipid Metabolism,Glycine and Serine Metabolism	Organic acids and derivatives	3-Phosphoglyceric acid	3389	2388	3283	2125	1900	1510	1345	2581	1508	3723	3657	2569	3165	3060	1135	2672	2831	3571	2925	1838	4026	4040	2953	5129	2390	2920	5591	3661	3059	6665	6299	2518	4598	4681	3227	4149	4812	5058	1909	4573	1610	2227	4123	2927	4365	5411
	Glycolysis	Organic acids and derivatives	Fructose-6-Phosphate	1068	1571	1199	2108	2262	2957	2955	8726	5634	4291	5458	7427	6782	4652	1023	932	3941	2598	1616	3078	2919	1582	982	1746	1419	774	975	1584	2112	1982	1597	1540	1534	1297	1365	2452	2518	1350	567	1134	749	519	1340	1038	478	1467
	Glycolysis	Organic acids and derivatives	Glucose-6-phosphate	1230	5413	5890	12706	12912	14179	18303	41438	25999	26114	30525	41231	36278	26856	3907	4998	18148	13906	4703	16082	13520	5666	3850	6995	3729	3075	5027	6181	7739	12384	6584	4652	6506	2102	3315	8521	8901	1779	1387	1450	1785	1385	1345	1079	1643	4735
	Glycolysis	Carbohydrates and carbohydrate conjugates	fructose	4866	7741	9909	6781	5420	8689	8415	13266	10805	4888	6264	7010	9508	38003	3369	3710	5227	7890	4872	6039	6051	7430	9904	27138	60402	7344	17550	13214	7765	25344	10286	5985	19937	3548	8567	3841	6864	9417	4712	7789	67029	21575	6367	5789	4439	5856
	Glycolysis	Carbohydrates and carbohydrate conjugates	Glucose	6299	12437	13838	14096	7657	13926	13149	19423	16901	8920	16051	15977	13739	35495	4469	5371	10057	8290	10185	11189	11494	8194	11402	38509	100322	7249	16639	13474	8742	57679	11925	7485	12652	7289	9276	6505	8176	11169	9056	12380	79531	25769	7143	8408	4809	11235
	TCA cycle	Organic acids and derivatives	2-Hydroxyglutaric acid	2154	2358	4010	2533	1294	2063	1778	2380	1746	2386	2540	1693	2111	2350	1906	2439	2101	2370	3487	2444	4340	2198	5048	3073	3250	5090	5419	3283	2248	2003	4174	4693	2817	5561	2391	2748	2697	3153	2278	6118	2067	2927	3794	5966	2769	3528
	TCA cycle	Organic acids and derivatives	citric acid	395717	400159	382464	375538	292414	348346	474207	563096	339602	606964	534425	468503	606959	338252	308360	415129	427386	423921	660604	418526	823474	436239	584437	377226	511673	477549	539196	563465	686769	656534	602072	526176	507085	1028112	595532	560794	600595	385910	500428	487975	473917	500342	649774	525260	458150	815944
	TCA cycle	Organic acids and derivatives	Fumaric acid	103340	96016	120024	80656	101885	152281	126615	214208	123942	153558	155372	160910	191189	127362	107581	138985	152135	183060	103768	120334	170025	164257	99092	142120	66562	125718	154039	171033	117653	129401	152252	113367	134901	95510	136197	154601	168073	134054	138637	144365	92437	93930	166765	153544	162980	205758
	TCA cycle	Organic acids and derivatives	Malic acid	200031	191342	232516	166943	138380	235394	224319	293310	190027	168772	226885	225891	236545	169818	155439	206234	198403	235077	220634	213416	337588	171295	165095	145696	133846	153517	168524	212052	173268	137375	165314	184516	155372	133947	169089	198270	204405	141436	194136	219808	186639	155336	204112	205175	157526	253011
	TCA cycle	Organic acids and derivatives	Succinic acid	43387	43957	36684	29543	22341	36092	30136	38807	28218	29120	38861	31171	30187	29873	21428	36780	27968	40099	47924	41798	40381	16088	16627	17328	20565	26429	16959	15673	20228	14828	19802	27206	17860	23612	15819	19264	21988	20340	31208	63577	36322	27566	35812	19119	16633	23927
	Glycerolipid Metabolism,Glycine and Serine Metabolism	Organic acids and derivatives	Glyceric acid	616	523	556	603	491	664	512	649	503	813	669	620	688	542	654	650	609	501	531	757	942	615	799	497	772	614	992	962	858	549	948	783	645	1097	833	949	1029	417	354	822	495	281	324	460	429	494
	Glycerolipid Metabolism	sugar alcohols	Glycerol	265703	273597	310084	300304	267491	321718	293318	424338	306598	377509	323986	397570	432515	317833	229687	266364	317417	316181	348484	337038	419918	366357	382586	350045	372593	386210	380236	491761	449153	434718	385217	401489	364189	427562	411600	406787	399515	325599	419269	466363	383111	458946	473824	396079	424806	507848
	Glycerolipid Metabolism	Glycerophosphates	Glycerol 2-Phosphate	12083	16422	13401	11153	8824	16921	12778	13969	12957	10388	15561	12328	15875	11671	10918	13067	13170	13331	14494	14666	11556	15708	21528	21416	18363	18328	17692	19696	18754	15459	15697	24164	17520	9742	13644	14200	16477	16537	14712	22655	13769	15635	23543	11004	12832	20017
	Glycerolipid Metabolism	Glycerophosphates	Glycerol-3-Phosphate	216230	301953	157820	86514	75834	229738	145830	125787	159819	83818	128080	146166	196352	104368	171004	191350	140923	209769	169521	152478	91005	250384	369061	265080	289439	340570	195611	252929	286305	261043	242619	376324	222146	77477	199300	194712	241137	283222	202302	278128	226940	188610	212174	97527	130111	247159
	Glycerolipid Metabolism	Organic acids and derivatives	Glycerophosphoric acid	10494	9944	9601	7219	8194	15770	13872	10814	11658	10420	9024	13258	13708	8210	9157	10677	10709	12426	7145	11290	10737	14427	18257	12328	11193	13681	13081	12659	15531	15611	12398	14829	12187	7929	12028	11950	14889	12043	11682	11345	9506	10415	18391	9077	9194	15091
	Ascorbate and aldarate metabolism	vitamin	L-Ascorbic acid	52540	53094	60526	36439	32916	54272	48924	51240	43230	42466	51584	110166	68974	31906	35157	57221	50310	53394	57019	46252	56457	112291	154342	97975	104666	121100	91321	114884	139013	99820	114311	129863	103764	112025	146210	119108	119302	110867	123605	123079	90053	114845	123900	90065	74473	165694
	Ubiquinone and other terpenoid-quinone biosynthesis,Vitamin digestion and absorption	vitamin	α-Tocopherol	15446	14652	16729	16732	14613	13577	12405	13349	12191	13956	12344	13604	12549	13480	11423	11315	13192	13173	11840	11262	14815	11114	10821	15053	8215	10978	12126	10869	10966	12293	11736	11303	12508	8450	9676	7852	11255	11006	17684	15246	16526	16733	15018	16289	15350	13771
	Pantothenate and CoA biosynthesis, Beta-Alanine Metabolism	vitamin	Pantothenic acid	17162	15970	23679	14010	11085	15553	14437	15934	11483	11877	12071	21678	18912	14002	7785	8792	9493	11586	19404	12217	19366	37314	38339	40076	40646	37221	30545	35543	28283	31500	24050	24021	28732	35755	26776	33226	30046	20103	21593	18495	13883	17002	22674	13423	12682	17009
	Nicotinate and nicotinamide metabolism	Organic acids and derivatives	3-Hydroxymethylglutaric acid	5766	5123	4633	3885	4245	6089	4679	6321	4588	5400	5893	5039	6870	3934	4402	5704	5620	5904	6649	6105	7608	5501	4055	5191	3921	4845	3482	4933	4848	4229	6206	5812	4509	5576	5227	5149	6444	4252	8206	6499	7246	5732	8654	5251	6046	11191
	Nicotinate and Nicotinamide Metabolism	Amines	Nicotinamide	209858	196154	225073	169528	145765	232157	210700	259559	168119	207274	245331	223044	259826	156670	147532	219729	192906	219848	256970	217209	272331	242838	243989	221238	231192	235433	238911	279475	292480	243570	250335	259979	208032	283459	228585	247438	255419	195763	187080	232423	179212	172480	233811	216279	183087	287051
	Phospholipid Biosynthesis	Amines	O-Phosphoethanolamine	130630	127659	167951	110413	89017	148844	140338	139737	102899	128345	148647	142970	160085	117602	110362	159208	148748	145512	158349	147372	160197	124321	113668	115368	106365	122487	118642	112675	152557	139087	136085	144551	114229	138218	125185	140740	162630	120247	344408	350923	281204	322053	392575	259320	261774	420655
EPA	Not Available	Amines	Palmitoylethanolamide	28164	32457	29902	28776	22622	22157	21359	19910	26881	26056	28323	21571	22955	29843	21559	22304	23579	24784	21449	21806	29357	23400	25318	18385	29758	21232	28081	30794	21995	18483	28922	52093	29366	20190	20339	33945	19946	23459	22001	21061	24810	28344	108741	20357	171223	79888
	Sphingolipid Metabolism	Amines	O-phosphocolamine	8502	7049	7124	6633	6721	10815	9996	12546	7976	8779	8981	9178	9278	6577	6402	8874	7699	9152	12716	11150	11428	5804	6360	5230	5357	6400	6797	6819	8171	5875	6143	6296	4645	8801	7152	6515	7945	4938	6405	7824	6059	6065	8423	8272	6270	9828
	beta-Alanine metabolism	Amino acids, peptides, and analogues	β-Alanine	42108	41609	60946	53753	27210	72152	50644	71823	45832	55689	64150	54027	60122	55161	31897	48042	39615	51740	83554	42156	75005	29944	32850	27706	44743	52832	38264	43437	43136	40271	44317	38868	28736	68999	34418	53296	54958	33637	39746	43356	22715	28580	42054	47956	39948	38902
	Alanine metabolism, urea cycle	Amino acids, peptides, and analogues	Alanine	614354	547635	514181	338933	455287	1176813	800215	1202398	560275	634067	517066	790511	969454	468489	445634	527773	498204	587403	798983	691496	791496	865773	645682	557720	385213	961894	593630	897953	820215	673496	681933	701235	544504	838033	789882	690365	738342	659126	1132305	1038675	886625	840813	1120312	1084019	1138074	1392864
	Alanine Metabolism	Organic acids and derivatives	Pyrophosphate	79095	110553	269354	218151	89756	84434	84682	78018	102723	139091	188753	103064	69640	186485	90428	150188	138973	97627	158046	103137	214186	94791	96653	152302	200941	109057	188399	182531	233683	105336	105115	106518	211022	169225	119595	76165	163301	133179	114985	203040	89458	112251	135760	161821	56948	90814
	Alanine, aspartate and glutamate metabolism	Amino acids, peptides, and analogues	N-Acetylaspartylglutamic acid	75371	81660	231147	111894	64900	80743	57558	112153	76121	74074	218553	124639	112495	96580	51619	94864	95639	72756	208212	87615	321726	72392	40616	49511	87330	44952	73665	97858	65922	51920	44874	46703	50650	102815	43319	49300	85179	22083	41361	49682	19277	25216	15048	20729	8747	28614
	Arginine and proline metabolism	Amino acids, peptides, and analogues	Proline	19201	9249	22436	21673	10613	18833	25226	15502	12211	18144	26354	11681	31283	17599	12622	8885	10190	13442	20768	15115	32383	21240	22900	19319	31928	27060	34235	30640	17913	19610	22574	21785	24892	22556	13122	28784	18582	21963	18438	24045	20639	30804	31456	21218	23917	27562
	Arginine and Proline Metabolism, Aspartate Metabolism	Amino acids, peptides, and analogues	Aspartic acid	2740825	2625870	4045867	2988961	2180089	3590515	2826885	4327804	2529966	3276565	4566494	3087314	3208982	3006249	1933791	2830578	2889234	2904274	3965721	2928265	5486343	2166931	1703336	2107486	2590512	2651419	2833919	3318354	2648626	2207240	2341638	2243086	1885873	3381388	2063589	2687143	2672632	1574758	2289730	2839489	2046932	1831507	2383399	3546924	2122934	2992570
	Arginine and Proline Metabolism	Amino acids, peptides, and analogues	Citrulline	2997	2996	1853	1764	3237	5341	3906	7006	3341	4540	2339	5296	4915	1900	2472	3461	3395	3106	3023	3503	3253	4417	2832	3785	2008	2810	2353	2692	5142	4386	3877	3562	3673	3677	3829	3852	4754	3029	3553	2389	2480	2577	3231	2269	3736	4463
	Arginine and proline metabolism	Organic acids and derivatives	Creatinine	144440	195264	77149	56959	158701	170178	172303	180212	130047	194889	75194	167903	143079	68363	149455	238384	211349	203446	80895	172312	95382	173863	106261	160459	60881	161833	79031	81523	236110	179900	175307	201834	306161	110383	294328	151903	184914	188356	136278	78510	133905	100870	125063	79932	109239	174588
	Aspartate Metabolism	Amino acids, peptides, and analogues	N-acetyl-L-aspartic acid	3066161	2876340	3582213	2740079	2334355	3384580	2987812	3292893	2800967	2573048	3463119	3079977	3241808	2888624	2451667	3026369	2867545	3174592	3557869	3118614	3567905	3170934	3117223	2956312	3286764	3385441	3474802	3865288	3433938	2934769	3142428	3171138	2769328	3776547	3239239	3197248	3454974	2844204	3467648	4077517	3096488	3059940	3404718	3906731	2690373	3660716
	Aspartate Metabolism, Protein digestion and absorption	Amino acids, peptides, and analogues	Asparagine	13775	12908	8371	8282	12731	15309	9614	27578	11137	13158	6548	11216	14655	6884	13289	13887	12974	18606	8059	13909	8552	18434	18297	17517	8320	20008	8591	8039	17698	18025	24019	16929	17600	10900	20164	17614	13311	22626	17499	8397	20775	18062	18795	7608	19827	23981
	Arginine and ornithine metabolism	Amino acids, peptides, and analogues	Ornithine	8187	7917	11428	9427	8625	22687	12971	27962	9888	13031	13188	13570	15072	9013	6292	10899	15134	9747	22008	10961	17937	9499	7213	10888	8851	14747	22183	14763	15871	10881	13688	9018	8544	22085	10572	8327	11024	7370	12691	12351	8207	6700	10725	13314	14067	15152
	GABAergic synapse, Glutamate Metabolism	Amino acids, peptides, and analogues	γ-aminobutyric acid(not sure)	434330	332213	895166	577043	235211	918037	532382	935307	451465	517894	756180	412825	702543	740174	299674	515739	468855	618457	985265	461262	1142247	247946	453686	391215	615102	843810	600260	839755	475914	512110	438355	476535	317894	1128131	416768	654622	598833	272760	499969	586549	191183	225568	690093	699402	741409	499664
	GABAergic synapse, Glutamate Metabolism	Amino acids, peptides, and analogues	γ-aminobutyric acid	7087	6796	7656	5443	6227	5963	7413	9420	6443	6933	7221	7896	8533	5598	4508	7454	7148	9982	10949	6150	8562	9455	9179	8223	8095	9280	11117	11418	11236	9128	8651	9600	10605	12871	8567	11975	9932	7537	8549	8769	7880	7610	11450	7723	7002	12031
	Glutamine and glutamate metabolism	Amino acids, peptides, and analogues	Glutamic acid	1654900	1674463	2242203	1399419	1356151	2435538	1706683	2401217	1472018	1610606	2153306	1682662	1934268	1296053	1220775	1702048	1613815	1848111	2292349	1562394	2073468	1839129	1842278	2192975	2299461	2970420	2942591	2864296	2719151	2033851	1702117	1983685	1797121	2848725	2084223	2110793	2027188	1690265	2645186	3752027	2323797	2366111	3134568	2992968	2697817	3246389
	Glutamine and glutamate metabolism	Amino acids, peptides, and analogues	Glutamine	97758	146618	82515	60113	142294	343977	124882	301265	154886	87750	54147	166059	111831	28083	111917	248754	178445	122286	116036	105334	48401	100851	79808	235224	44443	113200	57866	50313	107728	114312	115461	70479	92361	132727	134971	89568	73134	120062	148625	117867	156598	120582	100303	99437	265758	110761
	Glutathione metabolism	Amino acids, peptides, and analogues	Glutathione	30262	15800	26878	19855	14750	28238	23294	18467	15792	11853	31785	22539	37148	17316	20626	20454	21360	25858	23586	19965	20620	70489	68754	52996	60041	84433	73176	68773	58343	48256	60357	55582	48727	39736	68524	49042	64955	59027	63587	103784	61287	68983	20833	60728	9987	54778
	Glutathione Metabolism	Amino acids, peptides, and analogues	Pyroglutamic acid	6878003	7052701	11322114	6744880	5846380	7921289	7401401	8277292	6250928	6934270	9059841	7512385	8302852	6555599	5431190	7038549	6573421	7314871	8351887	6811738	9085699	9067785	9370903	9957828	10256142	9264466	11222445	11120831	10003224	8919713	8728501	9106996	8542609	10437353	8686342	8449710	9029517	8014387	9659644	12313833	8872670	8714420	10609020	10133414	7969558	11063382
	Cysteine and methionine metabolism, Glutathione Metabolism	Amino acids, peptides, and analogues	Cysteine	105362	81338	48614	89751	95082	131457	111861	184865	80482	142743	92601	123079	131165	66026	75439	92043	94077	100893	176390	87451	116090	60931	60472	51728	44169	78997	36575	46912	100518	92502	119521	72085	66503	176724	95055	130550	100255	64216	81665	59498	49569	61931	93865	94174	125137	88425
	Cysteine and methionine metabolism, Sulfur metabolism	Amino acids, peptides, and analogues	Homocysteine	18856	6256	7663	10139	3454	2007	3828	6010	2885	3978	7204	5324	3066	3569	4031	2862	7555	556979	8876	11567	8573	6010	5261	3569	5285	1750	3918	4850	6373	3549	4506	6015	3596	4106	3254	81894	6328	4198	7184	3967	41360	7822	4268	2895	2278	3510
	Cysteine and methionine metabolism	Amino acids, peptides, and analogues	Methionine	29267	43592	94404	37701	16391	31906	24342	46070	22047	23109	23517	28761	29456	22691	12075	17657	20375	18533	37200	26742	48014	37582	53728	80811	52060	30662	38653	43179	24724	24992	24973	26458	25836	49475	32074	37405	34923	22663	50079	92386	53431	46864	32905	39864	22408	30660
	Cysteine and methionine metabolism	Amino acids, peptides, and analogues	O-succinylhomoserine	2972	2304	2027	1570	1891	2794	2617	2628	1830	2080	2272	1858	2085	1630	2246	2688	2150	2705	3802	3066	1580	2817	2959	2852	1761	3280	2355	2581	2736	2373	3758	2794	1644	3850	2452	2256	1767	3764	3161	4592	2703	3072	3620	2752	3124	3314
	Cysteine and methionine metabolism	Nucleosides, nucleotides, and analogues	5'-methylthioadenosine	3112	3435	2445	2031	3438	4445	3927	4538	2822	3274	2717	3821	3738	2101	2783	4320	3995	4489	4035	4389	3683	3163	3898	3201	1801	3085	2594	2068	3681	3257	3636	3535	3396	3506	3177	4414	3467	3120	2659	3102	2376	2013	3294	2725	3015	3426
	Valine, leucine and isoleucine degradation,Valine, leucine and isoleucine biosynthesis	Amino acids, peptides, and analogues	Isoleucine	37252	33925	57836	42424	35360	63960	50726	81207	35423	45446	69451	62546	85813	48636	45340	43932	41442	60119	93257	57409	98762	63280	49418	43075	55677	67095	71168	104268	55954	63997	70045	66955	56404	106842	60439	63527	68213	57490	46040	68725	35745	43724	63319	69500	67085	78238
	Valine, leucine and isoleucine degradation,Valine, leucine and isoleucine biosynthesis	Amino acids, peptides, and analogues	Leucine	41105	47327	80583	69871	52150	84704	65381	109361	47604	52515	82268	76946	93672	79859	59795	43417	45103	62682	96808	60092	91276	68975	51540	55632	71934	71378	86691	116431	49232	70922	61012	56438	55251	97878	56485	55870	57496	63727	51828	78197	46872	49503	55148	88277	95448	66285
	Valine, leucine and isoleucine degradation,Valine, leucine and isoleucine biosynthesis	Amino acids, peptides, and analogues	Valine	79599	74949	99068	75738	73634	122743	102048	156432	72658	97682	116006	116392	176505	81050	89459	81461	87260	119189	132046	107088	141637	115693	84228	82837	93749	130810	102274	143297	116660	132300	117967	118105	101763	143633	107646	115925	116643	110413	105641	110778	84917	111243	152428	114943	149308	195517
	Lysine degradation, Lysine biosynthesis	Amino acids, peptides, and analogues	Lysine	75480	80561	63537	56609	52782	129830	67544	138029	73617	81948	66149	80708	97273	47436	48479	109953	66494	68221	96443	84173	55461	77296	60156	89178	37509	59551	52976	56871	88736	72727	80550	50733	48797	74872	71277	48311	50254	57613	86143	65920	76841	55180	53789	45778	98256	80297
	Lysine Degradation	Amino acids, peptides, and analogues	2-Aminoadipic acid	4910	10257	6516	6689	4769	13649	7172	17043	13286	12115	11574	9066	11859	12691	6679	5182	10725	6922	13337	8519	19484	10253	10708	11792	14183	16908	30106	37412	37395	15930	11291	17088	16694	45836	34403	18862	22695	18219	14177	19137	15980	12673	15140	13094	22872	26513
	Lysine degradation	Amino acids, peptides, and analogues	N-Acetyl-lysine	16389	13220	21885	12862	8601	14781	12401	13284	11413	6449	14916	13899	11179	10095	11601	18271	12345	18117	13631	12492	15160	7560	5418	5725	6103	4736	5791	8090	2604	4887	5791	6596	7465	3237	5384	7249	10805	3501	8800	8654	8041	7223	7587	6879	4924	10597
	Lysine degradation	Amino acids, peptides, and analogues	Pipecolic acid	1063481	948497	1064614	884417	985872	1018826	1027737	1104084	943601	973954	1177505	963057	1065480	1003566	859128	915158	1008081	1048366	1049108	978506	1276274	1028478	1055400	1002184	1288303	1511171	1343652	1643633	1270063	1107231	997958	1029614	982715	1139948	1055920	1171966	1006540	1012138	1362670	1504948	1172721	1173943	1661607	1391703	1260242	1477452
	Glycine, serine and threonine metabolism, Primary bile acid biosynthesis	Amino acids, peptides, and analogues	Glycine	4516778	4456384	4395922	4407274	3441152	5410368	5113415	6061505	4352816	4764632	6178538	5192788	4855561	4566611	3434758	5258817	4213901	5386701	6334580	5432624	6461773	1582802	1329595	1449604	1515571	1422736	1459319	1540353	1712967	1675814	2098824	1804962	1516809	2885312	1294702	2009910	2033142	1153365	1319929	1350974	1170108	1186240	1616681	1326937	1358666	2140048
	Glycine, serine and threonine metabolism	Amino acids, peptides, and analogues	Threonine	91846	83232	136685	114041	74697	153830	89925	138031	57574	108091	135206	88503	142687	92245	65802	80712	79534	82120	202297	81803	212294	135502	149538	112982	196419	183956	176308	224662	172854	104749	138260	157055	121949	306878	127483	195456	158566	109110	114775	213947	81254	88526	119416	136634	128562	119105
	Glycine and Serine Metabolism, Methionine Metabolism	Amino acids, peptides, and analogues	Sarcosine	4843	5403	14001	8205	3141	3203	2976	3180	3960	5624	11565	4710	4257	8434	2861	2866	2656	2914	3773	2984	12372	3905	5935	3103	11838	4161	9599	14906	7744	3566	4781	7406	7169	4257	4869	15471	7182	3847	4539	3969	4965	4344	25290	2556	21004	11390
	Glycine, serine and threonine metabolism	Amino acids, peptides, and analogues	Serine	228851	256677	452147	305854	163855	354358	230791	437411	148747	245046	379484	269983	407814	284291	175654	192196	196436	255379	499258	189641	441227	342371	292512	290891	460814	449478	496371	532545	386548	270499	331613	448216	319804	684337	317259	370923	310034	270519	550985	980271	446013	440348	591003	830304	713424	733212
	Tyrosine metabolism	Amino acids, peptides, and analogues	Tyrosine	47323	42007	131519	51007	27097	37744	39300	43082	38883	45253	45527	44768	44776	44963	20330	21354	30168	33159	33903	38946	67208	49869	49126	89683	76263	45749	57440	75056	48430	38415	29321	44149	39871	44685	42647	48282	49637	25803	66053	85316	41746	60537	64799	49149	36264	60074
	Phenylalanine metabolism	Amino acids, peptides, and analogues	Phenylalanine	29826	26794	74749	27808	24303	43711	33500	55325	28470	41634	41274	37678	44291	32876	20088	25451	27979	30798	48039	34501	58875	34811	30208	63070	36383	43035	43520	54212	44378	37864	30696	31690	32954	56221	33012	42860	40819	25371	42956	49518	31021	31991	45651	43547	46599	54995
	Not Available	Amino acids, peptides, and analogues	Mimosine	74501	72828	158855	132362	64584	64651	74040	85169	63868	84383	132720	66866	94675	110470	72013	88863	89562	90464	132762	83035	162883	89331	102516	93441	181860	104771	162729	154112	125154	93570	118099	108661	124840	167821	97941	86010	115431	101281	103115	145425	86896	91050	89313	138626	73343	107137
	Taurine and Hypotaurine Metabolism, Bile Acid Biosynthesis	Organic acids and derivatives	Hypotaurine	10083	9377	14971	9471	7131	11179	9012	10119	6958	10348	11739	9376	10311	7321	5943	8637	7515	7541	20699	8827	11623	13162	11483	19365	15528	14236	12995	14670	13284	9567	15067	13051	10765	20274	9823	16757	11036	9074	12158	27047	10358	16106	22853	16000	26972	17908
	Taurine and Hypotaurine Metabolism	Organic acids and derivatives	Taurine	460792	432448	1024952	751564	365534	957681	463802	1043479	392295	685351	1104951	523923	893873	594902	268160	730865	661127	639262	911728	458990	1271980	1089793	1091257	1306009	1834261	1812695	1992107	2092776	2531286	1336056	1400860	1452872	1544269	2178789	1873298	962603	1711362	956939	2261563	2567200	1439340	1217646	570370	2155166	415830	2157391
	Pyrimidine Metabolism, Beta-Alanine Metabolism	Pyrimidines and pyrimidine derivatives	Uracil	36001	29136	41083	37365	29497	29923	30823	44307	26501	54546	42082	38547	42707	45926	24488	32017	30397	34317	58632	42561	70720	20551	11739	13302	21795	16968	20656	24972	24081	24376	19964	14834	21068	30352	12687	21490	22705	12731	32897	29485	24354	24487	37924	34827	37911	36274
	Pyrimidine metabolism, Arginine biosynthesis, urea cycle	Organic acids and derivatives	Urea	1360721	975351	1213251	1155411	939146	1247060	1294729	1297430	813248	1200494	1331142	1050950	1419155	729260	1030408	1931607	1906181	1879573	1894115	1367310	1935361	1531094	1614660	1301778	1500000	1530280	1263685	1222223	1691156	1284555	2384258	2383208	1761579	2146197	1505275	2357922	2050986	1401182	1558758	1995926	1171052	1717274	1790276	1643076	1311056	1892348
	Pyrimidine metabolism	Pyrimidines and pyrimidine derivatives	Uridine	116915	95125	130667	98254	76265	96789	97844	115165	79754	106236	132317	106943	133734	99626	79537	97248	93633	110361	173028	120895	180366	151828	136381	131685	186653	185667	174216	221934	181018	148379	155386	142897	138989	244324	149659	152903	146523	129595	115424	98019	84009	86375	151832	87816	94373	139032
	Pyrimidine Metabolism,Lactose Synthesis	Pyrimidines and pyrimidine derivatives	Uridine 5'-monophosphate	12066	15408	5616	5998	8661	14758	12273	13921	10452	8029	9503	11295	17396	5228	9795	11868	12828	14040	14452	14037	6744	15714	21546	18785	15094	35035	21316	15855	20937	18920	16127	19245	21755	26355	23224	18159	21856	19487	27957	35482	25374	22255	17375	19360	9511	33133
	Purine metabolism, Caffeine metabolism	Purines and purine derivatives	Xanthine	32531	27781	10493	19482	42179	32886	43053	69981	25063	63432	24153	57012	72653	4234	19514	32380	36834	31687	61340	48887	34675	36234	21134	22800	10637	19606	14732	15565	40761	45149	31881	18038	21482	68605	20662	34032	26428	15968	52852	30548	38846	39212	52800	45401	49470	55284
	Purine metabolism, Caffeine metabolism	Purines and purine derivatives	Xanthosine	472	678	697	1584	275	641	856	1453	727	1623	467	1016	957	540	871	821	1003	532	1741	1409	1695	852	149	372	1372	825	1305	654	1029	572	846	513	702	1239	394	558	836	501	1000	978	774	1008	1372	1160	1105	954
	Purine metabolism	Organic acids and derivatives	Oxalic acid	2432	2684	2690	3195	2639	2809	2373	2699	2907	2854	3035	2293	2538	2857	2463	2771	2885	2799	2743	2590	2744	2564	2468	3131	2572	3328	2764	3245	2657	2402	2864	2795	2357	2978	2525	2236	2273	2436	3246	2503	2949	2876	3098	2780	2795	2233
	Purine metabolism	Organic acids and derivatives	Hypoxanthine	354918	278612	139136	192372	304132	336782	441192	707597	310026	589745	317289	523645	630835	139461	228946	317945	338182	360183	654419	499093	506545	328637	237335	235054	190630	223226	196901	207344	385527	434211	327235	228786	253040	767656	259758	388866	341412	178745	267823	232856	176753	195827	297096	257086	321542	375995
	Purine metabolism	Purines and purine derivatives	Inosine	656009	523164	503810	575193	546837	645823	844048	1172381	671395	858464	792507	913472	974881	709816	426695	592367	580483	655456	999351	946753	1245241	458026	292602	324239	305574	272330	337101	387873	487962	557039	356915	272978	348645	891902	323159	530951	496520	225203	375713	318820	237435	269168	458996	366790	482799	458100
	Purine metabolism	Purines and purine derivatives	Guanosine	57997	34516	21785	39532	46617	46887	61432	87680	38460	65925	44033	67166	81589	39848	33397	51805	47953	48750	68631	62619	71630	47903	36856	32697	27295	41018	27140	31376	52450	54450	44870	28637	32497	65947	39450	43497	30945	34842	41945	26551	35115	30015	43863	33281	38954	36449
	Purine metabolism	Purines and purine derivatives	adenine	49872	44328	64878	50195	38230	46128	45538	45901	34567	50847	56552	53184	62130	44675	33569	47694	44443	51217	50404	51564	73432	53947	52543	48531	63177	54573	60892	81639	69619	54205	54660	58098	55353	60018	63733	57421	67783	42935	48182	41302	38796	37874	59864	39342	32121	63499
	Purine metabolism	Purines and purine derivatives	adenosine	273089	221840	174970	262240	405627	224455	127892	87641	145799	191064	250659	342253	431842	69345	215070	240241	459617	420232	38435	38010	40032	473911	528777	483119	317957	582124	323010	406116	542776	512737	671922	469492	385281	253189	488589	398170	248310	520398	689944	559060	756492	524643	715998	616402	361855	712641
	Purine metabolism, urea cycle	Purines and purine derivatives	adenosine-5-monophosphate	340547	402301	187699	116438	111579	451745	197393	133133	198344	95943	157440	145853	162068	71892	250766	469659	283500	354662	257861	238658	38891	453942	549230	488441	284596	648857	392956	346261	403748	312665	444629	546276	360956	302051	476092	438751	468373	431660	584708	673365	454178	506469	511838	404805	333102	561501
	Propanoate Metabolism	Organic acids and derivatives	2-Hydroxybutyric acid	21066	20542	15885	14389	22840	13254	26323	22248	22797	31453	36798	31529	35996	13901	28575	34287	56295	58748	55504	55976	81441	19066	11299	12804	17406	12062	18656	25845	25630	28069	36301	63201	55872	59238	49387	77440	76687	25784	16076	12305	14365	22608	18179	14254	14206	50811
	Not Available	Organic acids and derivatives	Aminomalonic acid	3010	1745	2547	3171	1735	3641	3227	2691	2217	2327	3422	2679	3718	3674	1653	1796	1266	2131	2746	2414	3306	2805	3699	2804	4363	4409	4765	5132	4835	4428	3521	4191	3474	4891	3008	4530	3033	3446	3473	4762	2601	4244	7306	5206	5598	6467
	Not Available	Organic acids and derivatives	Decanedioic acid	137224	95018	175329	166373	118680	108010	103240	93813	93636	109620	203523	108674	114607	160418	99386	94829	95869	105872	164113	129484	237015	150016	109836	115649	225045	189597	207379	212779	144239	117807	148803	109722	132764	212913	123351	126375	127437	140720	112666	166850	113864	109044	108596	142986	86227	109137
	Not Available	Organic acids and derivatives	dihydroxyacetone phosphate	3953	8132	4816	7936	7906	10962	10822	23387	11805	13912	10280	12353	16261	10284	6978	7086	12154	12579	6711	11255	14882	3549	4787	3648	4916	3562	2563	3743	7356	6511	6754	5654	6008	3722	3088	7703	8476	2484	765	1078	774	711	1242	722	1695	2617
	Not Available	Organic acids and derivatives	methylphosphate	611874	520444	385268	452196	609391	675202	705787	733210	570192	771397	600783	759606	913926	549431	677537	820364	836879	789730	732393	646015	429867	1061822	804216	1051420	617571	932333	901170	913823	978751	1047436	1283871	829366	984365	947093	820009	725269	899020	936296	665454	816948	606783	554558	472013	904855	517559	540421
	Not Available	Organic acids and derivatives	Iminodiacetic acid	16642	5934	11033	12971	8547	18649	18733	12812	9464	11670	16377	9568	18784	13149	9786	8561	8275	9017	14949	11127	23721	12131	13704	8777	11458	19591	18185	15809	9134	10991	12146	10706	10791	15362	8641	15382	10083	12555	15073	17555	13702	21797	21081	18611	27047	20044
		unknown	unknown-1	33219	32288	27263	27684	30634	37521	29829	36463	30094	31027	32022	29025	32627	28714	30586	34833	37865	34458	27256	36383	27081	40613	27542	33398	30069	35216	34696	31732	32436	37609	34911	34730	32926	30390	29455	32445	31147	34620	35237	38965	37007	30317	30817	27069	29972	32643
		unknown	unknown-2	4851	5300	10355	7566	5188	5515	5127	5852	5434	6897	12195	5083	5200	12862	5285	6028	5800	6581	9294	8047	10942	6424	6349	5804	8924	5865	8399	8977	8320	5986	7739	7594	7363	9571	6480	7996	6488	5579	4530	7604	5067	5245	6541	6540	7585	10116
		unknown	unknown-3	408147	15700	452038	410408	14705	14697	14670	15592	399077	17838	416753	391857	14742	433364	15295	14843	15152	15565	412188	15294	446931	14793	14454	14978	405435	15055	420885	426396	17101	15348	15412	16406	17985	422904	16360	14830	17580	15800	15275	418074	15287	15650	420206	418614	404886	18047
		unknown	unknown-4	2453	2537	8094	7761	2569	3535	2752	3566	2704	2689	7335	2651	3020	6667	2163	3338	3072	2763	9085	2780	7811	2722	3056	2979	7051	3538	6357	7125	2533	3032	3138	2657	2830	7336	2932	3039	2725	2762	3321	7289	2511	2551	3056	7423	3694	3068
		unknown	unknown-5	69300	60375	63474	45654	46161	73154	68522	71205	52812	71734	74241	62384	77492	54367	50445	65952	68905	72000	77720	81298	102855	37818	30351	32012	28267	33406	32313	41755	42006	36342	40463	40932	34789	44227	33208	44138	54624	25155	47300	72190	51370	42754	60012	54224	51790	68922
		unknown	unknown-6	1170797	903065	1111828	817307	773138	1226622	1108483	1219203	1042462	772401	1037435	1130034	1260820	888536	778359	885892	841219	1021785	1002997	1043271	1204526	1208329	1045395	975889	935438	1035079	1243275	1512324	854799	1049681	881521	898371	895949	920499	999952	966904	1086245	862077	1134437	1291839	998531	1031115	1197211	1225837	872171	1258916
		unknown	unknown-7	5361	7126	9690	8881	22745	5514	6246	9490	6177	8627	8816	6896	14414	12258	3988	5798	8333	17247	7311	15977	13077	7675	12091	6578	10491	6275	8984	10007	7672	29359	13113	9585	5836	8269	5557	6650	6237	6435	10844	7157	9799	7846	19247	7036	20627	14419
		unknown	unknown-8	7760	8513	21004	20639	8149	7879	7886	8356	8101	8228	19956	7668	8519	19839	7607	8263	8627	8067	21246	8172	22305	8072	7594	8002	20353	8196	21012	21436	8437	8670	8420	8130	7922	21531	7454	7330	8082	8462	8335	22390	8380	8084	7308	23159	7505	8124
		unknown	unknown-9	46954	46120	95684	66505	35401	41611	42127	36035	40943	52595	75651	37545	34856	215850	43370	37169	38451	36627	45863	40229	75516	34860	35311	31494	80386	38676	79082	95910	43142	32923	36728	37667	59117	43555	45478	34281	34347	31340	35369	39114	37716	30828	34952	44333	30248	29208
		unknown	unknown-10	4404	5304	12236	8433	4718	3979	4752	4273	4207	6864	10310	4553	4048	23303	4072	4254	4586	4649	2256	4913	10438	4675	5055	4503	11856	4704	10727	15068	9789	4669	5030	6768	8737	3061	5796	4559	8201	5419	5926	3154	6754	4840	6781	4261	4877	8163
		unknown	unknown-11	95874	36236	157187	229075	66988	68306	91631	44815	59390	57721	220536	54558	93469	168049	76992	49266	58614	54492	142322	68019	212407	67196	61803	66339	199860	81527	201633	125882	34465	75272	61650	66991	81662	132704	36384	79025	44205	70400	49352	133655	61245	117806	76324	134011	109457	62287
		unknown	unknown-12	8448	8881	11454	10210	9279	9968	8866	10411	7729	8781	11589	8116	12209	11423	9609	8228	10155	10448	11224	9641	12582	17310	15331	15748	21851	16252	17715	14901	17886	14570	15288	16881	12751	17386	14669	15010	11976	15754	15589	17040	12123	12046	15993	14943	11724	20328
		unknown	unknown-13	23387	97959	25168	24217	93200	94529	98032	94825	25777	107869	24679	22134	94904	23469	93701	96304	95915	96128	24843	95822	26333	93943	91898	93706	22136	95009	24333	24105	104694	97082	97327	100294	102876	25472	94611	94605	98437	95609	91539	24551	96572	93897	23987	20880	22740	107225
		unknown	unknown-14	186127	214202	295532	112611	276357	111184	321194	359048	155541	245153	220318	452339	542870	110827	290740	139495	141502	201954	205296	269536	367875	303981	213063	188736	231290	115431	204260	376691	311450	324408	232651	173914	266571	293520	250013	293502	456697	199584	309877	224234	286287	189442	130987	236660	55623	296676
		unknown	unknown-15	34878	42490	71899	81846	53391	29334	43466	48213	45045	74997	57796	38508	61600	68130	55108	81106	78173	71173	46286	51252	64860	37550	37013	60389	72354	39182	62123	55474	87758	49222	61619	45276	100853	51829	53253	23233	67680	57361	65314	49142	47339	38294	17968	53139	7888	39768
		unknown	unknown-16	59271	42234	52789	64225	42802	60056	60130	64912	44083	42247	50993	53428	63613	44592	31645	38227	38985	40238	53465	46823	58306	67047	48180	42158	70511	61221	65213	69425	45449	49728	38778	40809	39908	61658	46140	41007	50671	44458	55451	59732	41738	71026	66026	69279	38253	56734
		unknown	unknown-17	640	470	832	993	558	570	493	612	671	514	1101	437	680	2994	526	687	737	575	381	257	804	514	623	303	818	648	1109	1092	809	518	616	793	793	381	794	519	828	728	424	604	789	701	734	519	471	672
		unknown	unknown-18	2588	3521	5381	5597	3948	6770	5607	9797	6658	6707	7884	5581	7392	7094	5302	6909	8159	6981	5019	3818	5729	13049	8568	11847	5933	9523	13936	9391	10516	5102	8035	15463	8794	4245	9043	5045	8434	11973	17426	16149	11353	13109	16585	13018	9458	15105
[truncated: 106 more columns]

## Sheet: GC-MS Normalized data
Supplementary Table 3. Normalized Data for statistical analysis.
The raw data were normalized to the total intensity of all detected ions in each sample.
Ctrl: mice fed ad libitum			BST: brainstem	HYT: hypothalamus
F-3h: mice subjected to 3 h of fasting			CBL: cerebellum	OB: olfactory bulb
F-6h: mice subjected to 6 h of fasting			COR: cerebral cortex	SC: spinal cord
F-12h: mice subjected to 12 h of fasting			HIP: hippocampus	QC: quality control
F-24h: mice subjected to 24 h of fasting
				BST																					CBL																	COR
			Raw data name	48-bs-c	50-bs-c	51-bs-c	52-bs-c	40-bs-3h	41-bs-3h	42-bs-3h	43-bs-3h	44-bs-3h	20-bs-6h	21-bs-6h	45-bs-6h	46-bs-6h	47-bs-6h	58-bs-12h	59-bs-12h	60-bs-12h	61-bs-12h	53-bs-24h	54-bs-24h	57-bs-24h	48-cb-c	49-cb-c	51-cb-c	52-cb-c	40-cb-3h	43-cb-3h	44-cb-3h	20-cb-6h	46-cb-6h	59-cb-12h	60-cb-12h	61-cb-12h	53-cb-24h	54-cb-24h	56-cb-24h	57-cb-24h	58-cb-24h	48-cor-c	49-cor-c	50-cor-c	52-cor-c	40-cor-3h	42-cor-3h	20-cor-6h	21-cor-6h
abbreviation of metabolite	metabolic pathway	chemical class	metabolite name	Ctrl-1	Ctrl-2	Ctrl-3	Ctrl-4	F-3h-1	F-3h-2	F-3h-3	F-3h-4	F-3h-5	F-6h-1	F-6h-2	F-6h-3	F-6h-4	F-6h-5	F-12h-1	F-12h-2	F-12h-3	F-12h-4	F-24h-1	F-24h-2	F-24h-3	Ctrl-1	Ctrl-2	Ctrl-3	Ctrl-4	F-3h-1	F-3h-2	F-3h-3	F-6h-1	F-6h-2	F-12h-1	F-12h-2	F-12h-3	F-24h-1	F-24h-2	F-24h-3	F-24h-4	F-24h-5	Ctrl-1	Ctrl-2	Ctrl-3	Ctrl-4	F-3h-1	F-3h-2	F-6h-1	F-6h-2
FFA C6:0	Fatty acid metabolism	Fatty Acyls	Hexanoic acid	0.000134213	0.000121125	7.6278e-05	0.00011234	0.000135084	0.000124795	0.000141662	0.000110306	9.29087e-05	0.000167592	8.00626e-05	9.04359e-05	0.000105642	0.000116048	0.000161961	0.000119918	0.000130706	9.94167e-05	8.57433e-05	0.000124135	0.000103103	0.00012711	0.000120236	0.000156138	9.80011e-05	0.000109929	9.50786e-05	7.88635e-05	0.000146736	0.000136741	0.000147132	0.000153007	0.000122236	8.01674e-05	0.000118117	0.000120837	9.55691e-05	0.000202571	0.000110953	7.8857e-05	0.000148718	0.000131816	0.000110435	8.94211e-05	0.000151639	0.000109666
FFA C8:0	Fatty acid metabolism	Fatty Acyls	Octanoic acid	0.00272597	0.00189907	0.00212748	0.00486776	0.00351664	0.00173128	0.00285742	0.00277858	0.00242903	0.00387397	0.0033822	0.00244487	0.0041572	0.00373944	0.00364887	0.00360805	0.00371183	0.00362096	0.00296119	0.00341393	0.00239915	0.00246571	0.00332395	0.00395858	0.00480983	0.00299976	0.00409655	0.00359901	0.00521173	0.00425607	0.00380068	0.00211679	0.00478723	0.00338935	0.0028027	0.00212531	0.00382951	0.00379037	0.00384073	0.0029053	0.0030111	0.00260765	0.00152941	0.00261045	0.00102884	0.00163503
FFA C9:0	Fatty acid metabolism	Fatty Acyls	Nonanoic acid	0.000366615	0.000425067	0.000390235	0.000471837	0.000405391	0.000490599	0.000586247	0.000313394	0.000521604	0.000610716	0.000399189	0.000411134	0.000368386	0.000593241	0.000567153	0.000492964	0.000285406	0.000368657	0.000383691	0.000279791	0.000361527	0.000481585	0.000440063	0.000323655	0.000354579	0.00035217	0.000450409	0.00040274	0.000428784	0.00039847	0.000331889	0.000426835	0.00067838	0.00033317	0.000431246	0.000478002	0.000349381	0.000394813	0.000305627	0.000288251	0.00035867	0.000429989	0.000373523	0.000401276	0.000439353	0.000357107
FFA C10:0	Fatty acid metabolism	Fatty Acyls	Capric acid	5.75069e-05	4.72484e-05	4.00745e-05	5.94978e-05	7.05403e-05	4.6505e-05	4.69146e-05	3.80824e-05	6.4871e-05	6.18201e-05	4.95117e-05	5.30142e-05	4.71439e-05	6.73055e-05	7.171e-05	6.29709e-05	5.17675e-05	5.07198e-05	4.71792e-05	4.46366e-05	4.09254e-05	5.39028e-05	6.99816e-05	5.45398e-05	5.46859e-05	6.70058e-05	5.05329e-05	4.53799e-05	4.29375e-05	4.86852e-05	6.67951e-05	5.26585e-05	6.18753e-05	4.52428e-05	4.88754e-05	5.15133e-05	4.26985e-05	7.13553e-05	4.61939e-05	4.3758e-05	6.05283e-05	6.09529e-05	4.74098e-05	4.58666e-05	5.86138e-05	3.78544e-05
FFA C14:0	Fatty acid metabolism	Fatty Acyls	Myristic acid	0.000241274	0.000314805	0.000270928	0.000361771	0.000300403	0.000332044	0.000200136	0.000317063	0.000280845	0.00030481	0.00028841	0.000296803	0.000274022	0.000402167	0.000269108	0.000348885	0.000403675	0.000473225	0.000292378	0.000306723	0.000274322	0.000328323	0.000314582	0.000256012	0.000338096	0.000267113	0.0002887	0.000292964	0.000282895	0.000327673	0.00029271	0.000313531	0.000290335	0.000283045	0.000246742	0.000283291	0.0002485	0.000325494	0.000260804	0.000275305	0.000290891	0.000297563	0.000335618	0.000260876	0.000381924	0.000290125
FFA C16:0	Fatty acid metabolism	Fatty Acyls	Palmitic acid	0.0138786	0.0171597	0.0212994	0.0258826	0.0167586	0.0151434	0.0132512	0.0150809	0.0172699	0.0200193	0.0201851	0.0153985	0.013943	0.0286976	0.015862	0.0142522	0.0161664	0.0138151	0.0169656	0.0146818	0.0203504	0.0179509	0.0160638	0.0149472	0.0242946	0.0145652	0.021484	0.0206892	0.0183028	0.016369	0.0145327	0.0207907	0.0178103	0.0174113	0.0160925	0.0162255	0.0150905	0.0176968	0.0168894	0.0185846	0.0179443	0.0202607	0.0279782	0.0194449	0.0311496	0.0236665
FFA C16:1	Fatty acid metabolism	Fatty Acyls	cis-9-Hexadecenoic acid	3.5575e-05	3.97021e-05	5.55582e-05	4.89341e-05	0.000121946	3.19416e-05	3.2908e-05	5.1394e-05	2.91217e-05	6.62244e-05	4.50894e-05	3.52515e-05	5.62352e-05	6.35271e-05	3.84976e-05	3.82982e-05	4.94935e-05	9.52457e-05	2.43602e-05	6.50438e-05	5.20506e-05	6.1134e-05	5.75295e-05	4.52893e-05	4.36629e-05	2.82716e-05	3.83892e-05	4.76724e-05	4.05346e-05	0.000173478	6.89883e-05	5.00459e-05	3.20962e-05	4.0343e-05	3.49556e-05	3.36378e-05	4.75795e-05	3.14073e-05	5.20774e-05	4.23349e-05	7.15521e-05	4.48794e-05	9.06391e-05	3.75956e-05	0.000117683	8.0779e-05
FFA C16:1	Fatty acid metabolism	Fatty Acyls	9-Hexadecenoic acid	0.00226737	0.00382068	0.00196221	0.0013221	0.00399887	0.00170075	0.00149279	0.00179211	0.00150029	0.00275235	0.00241949	0.00225247	0.00217048	0.00177228	0.00270141	0.0011704	0.00193589	0.00283224	0.00192386	0.00321085	0.00356121	0.00247166	0.00333899	0.00231206	0.00241391	0.00181932	0.00159655	0.00102561	0.00266872	0.00259374	0.00212541	0.00239944	0.00378288	0.00156048	0.00215668	0.00230645	0.00391058	0.00295457	0.00136753	0.000922108	0.00524533	0.00181303	0.00204318	0.0016556	0.00261018	0.0016896
FFA C17:0	Fatty acid metabolism	Fatty Acyls	Heptadecanoic acid	0.000130203	0.000147249	0.000189639	0.000213998	0.000169977	0.00011725	0.000125186	0.00012409	0.000160219	0.000188678	0.000156606	0.000148549	0.000131612	0.000224211	0.000161846	0.00011854	0.000132818	0.000126612	0.000122488	0.000125738	0.000164649	0.00016254	0.000146145	0.000145544	0.000199949	0.000121444	0.000163272	0.000156129	0.000161016	0.000142247	0.000148261	0.000174871	0.000173398	0.000133118	0.000136387	0.000153268	0.000134679	0.000149116	0.000129379	0.000128634	0.000121784	0.000147506	0.000183134	0.000126923	0.000221898	0.00016987
FFA C18:0	Fatty acid metabolism	Fatty Acyls	Stearic acid	0.0151737	0.0185587	0.0217833	0.0255828	0.0176219	0.0147673	0.0143898	0.0160201	0.0176848	0.0203971	0.0198305	0.0156992	0.0141825	0.0263014	0.0171803	0.0149821	0.0161929	0.0148317	0.0168025	0.0152602	0.0194516	0.0215199	0.0197479	0.0179774	0.0267501	0.0167548	0.0234108	0.0216389	0.0207678	0.0188438	0.0189667	0.0224441	0.0226774	0.0193583	0.0199732	0.0181461	0.0177744	0.0216066	0.019566	0.0189595	0.0215791	0.0231014	0.02536	0.0202656	0.0283405	0.0224793
FFA C18:1	Fatty acid metabolism	Fatty Acyls	Trans-9-Octadecenoic acid	0.00234694	0.00289313	0.00229111	0.00241421	0.00245354	0.00201954	0.00225852	0.00200869	0.00289919	0.00312544	0.00214822	0.00246465	0.00206729	0.00307549	0.00187018	0.00222074	0.00236269	0.00218784	0.00153437	0.00217768	0.0030953	0.00130429	0.0014884	0.00151614	0.00225264	0.00125097	0.0018635	0.00213173	0.00187889	0.00218039	0.00146577	0.00319611	0.00216821	0.00135323	0.00145901	0.00239452	0.00179528	0.001623	0.00147522	0.00108236	0.0014587	0.00170944	0.00330436	0.00141596	0.00325815	0.00275232
FFA C18:1	Fatty acid metabolism	Fatty Acyls	Oleic acid	0.000177629	0.000213891	0.000165048	0.000249905	0.000225149	0.00014061	0.000178175	0.000159794	0.000208977	0.000225396	0.000163516	0.000157104	0.000171832	0.000241389	0.000248285	0.000237613	0.000255774	0.000245674	0.000147238	0.000198536	0.000160575	0.000168449	0.000204477	0.000254579	0.0002068	0.000194926	0.000194732	0.000155191	0.000232591	0.000234002	0.000224105	0.000214253	0.000320068	0.000151966	0.000202439	0.000154648	0.000213246	0.000252475	0.000183046	0.000137413	0.000174312	0.000144255	0.000135968	0.000154085	0.000101549	0.000145606
FFA C18:2	Fatty acid metabolism	Fatty Acyls	linoleic acid	0.000155786	0.000171738	0.000175819	0.000252037	0.000139491	0.000112167	0.000157875	0.000132662	0.000156301	0.000241393	0.00022974	0.000215365	0.000202615	0.00053145	0.000162712	0.000164662	0.000221804	0.000170658	0.000194955	0.000193044	0.000255181	0.000190804	0.000199568	0.000192222	0.000253694	0.000144495	0.00022399	0.000230373	0.000280216	0.000244775	0.000282149	0.000385634	0.000278244	0.000291092	0.00033432	0.000314966	0.000260129	0.000283088	0.000143292	0.000199157	0.000190722	0.000191979	0.000264063	0.000116828	0.000411299	0.000286003
FFA C20:1	Fatty acid metabolism	Fatty Acyls	11-Eicosenoic acid	0.000365114	0.000515863	0.000369459	0.000577924	0.000448903	0.000348445	0.000350079	0.000370854	0.000500441	0.000560283	0.000466832	0.000423102	0.000367236	0.000621332	0.000406261	0.00039843	0.000435905	0.000375143	0.000297242	0.000349229	0.000487396	0.000276937	0.000320697	0.000279889	0.000449554	0.000265979	0.000372877	0.000402845	0.000357799	0.000338946	0.000417464	0.000481079	0.000416586	0.000269311	0.000301707	0.000425691	0.000375693	0.000302726	0.000216877	0.000144374	0.000137604	0.000221981	0.000234893	0.000156398	0.000305147	0.000203293
FFA C20:4	Fatty acid metabolism	Fatty Acyls	Arachidonic acid	0.00281941	0.00331037	0.00303201	0.00393616	0.00289578	0.0027377	0.00300782	0.00369701	0.00324525	0.00374378	0.00342598	0.00368328	0.00359978	0.00337942	0.002625	0.00252137	0.00295409	0.00259964	0.00275195	0.00330399	0.00347084	0.00361806	0.00472882	0.00379993	0.00440154	0.00401391	0.00353144	0.00474417	0.0047496	0.00449734	0.00424435	0.00503189	0.00396163	0.0036381	0.00425995	0.0049851	0.00400843	0.00397904	0.0057051	0.00509464	0.00550251	0.00704101	0.00856786	0.00383065	0.0090121	0.00742348
FFA C22:0	Fatty acid metabolism	Fatty Acyls	Docosanoic acid	4.71346e-05	5.59002e-05	6.5488e-05	0.000101184	6.128e-05	3.80406e-05	4.34184e-05	4.95961e-05	4.97928e-05	7.13362e-05	5.87802e-05	4.47544e-05	4.54561e-05	0.00017575	6.95729e-05	6.42156e-05	7.3579e-05	5.59545e-05	3.73943e-05	4.97768e-05	6.29929e-05	3.84594e-05	3.11302e-05	3.74499e-05	5.87761e-05	2.78263e-05	6.16034e-05	5.20489e-05	3.83877e-05	4.01974e-05	5.83632e-05	4.78402e-05	5.38226e-05	3.32973e-05	3.49779e-05	4.15082e-05	3.68946e-05	3.10845e-05	2.92786e-05	3.02294e-05	2.66616e-05	3.06119e-05	2.68074e-05	2.88358e-05	4.89968e-05	2.29368e-05
FFA C22:4	Fatty acid metabolism	Fatty Acyls	cis-7,10,13,16-Docosatetraenoic acid	0.000186702	0.000259866	0.00022573	0.000231667	0.000189418	0.000173372	0.000179639	0.000172324	0.000240119	0.000257276	0.000194398	0.000182178	0.000168341	0.000229913	0.000215794	0.000155038	0.000174028	0.000159959	0.000148686	0.00016038	0.000216135	0.000122097	0.000128247	0.000115217	0.000174733	0.000107804	0.000145837	0.000160141	0.000151483	0.000144663	0.000134186	0.000197228	0.000152727	0.000125464	0.00013351	0.000175218	0.000140257	0.000150656	0.000134765	0.000116768	0.000155242	0.00021618	0.000309598	0.000113576	0.000414946	0.000255961
FFA C24:0	Fatty acid metabolism	Fatty Acyls	Tetracosanoic acid	2.13047e-05	3.6722e-05	2.69844e-05	6.44954e-05	3.78502e-05	2.07601e-05	2.23757e-05	3.10543e-05	3.21522e-05	5.24638e-05	3.92482e-05	2.77292e-05	2.7945e-05	0.000124309	4.13279e-05	4.08766e-05	4.50848e-05	4.04799e-05	1.879e-05	3.42023e-05	4.40684e-05	2.54903e-05	2.20924e-06	2.18607e-05	2.8161e-05	2.58835e-05	3.81256e-05	2.97149e-05	2.15475e-05	2.48323e-05	3.35998e-05	2.50122e-05	3.76024e-05	1.64877e-05	1.9452e-05	4.09691e-05	3.03729e-05	2.54238e-05	1.93998e-05	1.46603e-05	1.59106e-05	2.37942e-05	1.67781e-05	1.8591e-05	2.34957e-05	1.92117e-05
	Not Available	Fatty Acyls	Methyl stearate	6.60871e-05	7.47178e-05	4.47682e-05	5.83846e-05	0.000121528	5.88985e-05	9.84836e-05	8.16129e-05	7.47261e-05	9.25818e-05	6.16363e-05	9.48397e-05	0.000101519	6.35976e-05	0.00011376	0.000111472	0.000108756	8.29411e-05	5.45318e-05	7.74111e-05	4.74941e-05	0.00024492	0.000168906	0.00013972	6.90221e-05	0.000108229	7.89058e-05	6.45531e-05	0.00018148	0.000155827	0.00017988	0.00014714	0.000123498	7.29071e-05	0.000109217	0.000111134	0.000132013	0.000230899	0.000147645	6.55685e-05	0.000148582	0.000130575	0.000134356	9.98914e-05	0.000141908	0.00013907
	Not Available	Fatty Acyls	Stearamide	0.000150947	0.000201947	0.000196296	0.000284107	0.000203532	0.000142682	0.000157526	0.000186344	0.00020469	0.000232356	0.000203667	0.000168482	0.000151003	0.000331364	0.000208516	0.000189624	0.000197487	0.000167405	0.000177539	0.000172835	0.000207072	0.000174294	0.000134451	0.000131679	0.000228806	0.000117761	0.000198724	0.000170613	0.000154831	0.000156045	0.000159163	0.000151936	0.000176862	0.000152896	0.000135941	0.000138497	0.000140565	0.000158501	0.000138601	0.000120386	0.000126307	0.000142043	0.000124851	0.000132393	0.000154237	0.00011427
	Glycerolipid Metabolism	Glycerolipids	MG(16:0/0:0/0:0)	0.000543303	0.000550302	0.000461857	0.000532709	0.000470408	0.000448258	0.000479504	0.000582132	0.000530646	0.000640246	0.000498987	0.000695063	0.000752136	0.000825196	0.000415473	0.000567782	0.000599027	0.000682069	0.00052974	0.000503941	0.00050351	0.000957645	0.00124628	0.000639179	0.000646844	0.0010402	0.000598807	0.000530579	0.00116619	0.00101068	0.00109453	0.00143439	0.00103869	0.000709204	0.00111896	0.000789022	0.000869125	0.00112877	0.00106633	0.000752305	0.000968135	0.0010723	0.00252708	0.000670066	0.00276533	0.00188351
	Glycerolipid Metabolism	Glycerolipids	MG(0:0/16:0/0:0)	0.000119338	0.000213483	0.000181616	0.000230293	0.000166268	0.000180019	0.000191002	0.000288896	0.000307897	0.000259763	0.000203704	0.000323985	0.00027337	0.00032768	0.000136056	0.000108804	0.000240692	0.000178958	0.000127594	0.000165454	0.000216617	0.000279561	0.000341138	0.00023731	0.000221034	0.000241735	0.000305362	0.000414098	0.000232059	0.000259814	0.000250508	0.000346017	0.000256541	0.000175911	0.000324193	0.000317726	0.000287569	0.000229261	0.000445182	0.000305792	0.000376239	0.000539185	0.000598331	0.000287775	0.000707969	0.000499661
	Glycerolipid Metabolism	Glycerolipids	MG(18:0/0:0/0:0)	0.000386934	0.000553955	0.000378436	0.000445049	0.000447369	0.000360272	0.000355061	0.000420741	0.000444957	0.00045636	0.000334531	0.00041992	0.000412174	0.000538279	0.000481812	0.000427171	0.000488322	0.000462276	0.000374426	0.000462402	0.000370906	0.000638387	0.000733959	0.000525082	0.000554897	0.000650792	0.000499134	0.000400691	0.000581429	0.000619632	0.000790831	0.000995693	0.000647293	0.000584616	0.000613319	0.000738932	0.000495585	0.000727308	0.000587421	0.000463386	0.000608784	0.000730599	0.00165314	0.000449568	0.00193877	0.00106377
	Glycerolipid Metabolism	Glycerolipids	MG(18:1(9Z)/0:0/0:0)	0.000481741	0.000752225	0.000763098	0.00120561	0.000713269	0.00105046	0.00104683	0.00146882	0.00116861	0.00102947	0.00102272	0.00146687	0.00115117	0.00111345	0.000712335	0.00051797	0.00112422	0.000793478	0.000561119	0.000900178	0.00115117	0.00057047	0.00055231	0.000511621	0.000526122	0.000379733	0.00048202	0.000818628	0.000360655	0.000728994	0.000412822	0.000570613	0.000699327	0.000360226	0.00043254	0.000706351	0.000790332	0.000289791	0.000530275	0.000401041	0.00036242	0.000572731	0.000665462	0.000511751	0.000837685	0.00048395
	Not Available	Pyridines and derivatives	2,3-dihydroxypyridine	0.000339195	0.000375488	0.000262494	0.000311274	0.000458442	0.000361249	0.000337536	0.000338202	0.000326745	0.00029801	0.000274608	0.000316399	0.000369173	0.000318481	0.000391272	0.000390917	0.000387293	0.000348136	0.000304168	0.000359004	0.00026466	0.000493423	0.000495651	0.000472223	0.000396749	0.000498972	0.00036834	0.000303471	0.000441271	0.000434206	0.00048279	0.000477845	0.000448682	0.000367647	0.000454066	0.000445615	0.000423027	0.000551278	0.000424987	0.000335284	0.000457611	0.000419988	0.000357251	0.00032804	0.000378779	0.000358297
	peptide synthesis	Pyridines and derivatives	2-hydroxypyridine	0.0113055	0.0118174	0.0110184	0.0125428	0.0137018	0.0107704	0.0109718	0.0101548	0.0107546	0.0107416	0.0112782	0.0106344	0.0117552	0.0116868	0.0122842	0.0121111	0.0124667	0.0109334	0.0104743	0.0109821	0.0103175	0.0162917	0.0159028	0.0152784	0.0166531	0.015618	0.0142482	0.0120989	0.01478	0.0138221	0.0160017	0.015382	0.0161119	0.0130388	0.0149364	0.0145632	0.0137897	0.0173852	0.0134542	0.0113711	0.0135463	0.0127833	0.0125913	0.011738	0.0118223	0.0126259
	Not Available	Pyridines and derivatives	3-hydroxypyridine	0.000787444	0.000777339	0.000682239	0.000758052	0.00115018	0.00087603	0.00073595	0.000756727	0.000696409	0.000730386	0.000663258	0.000613687	0.000890729	0.000784198	0.000879033	0.000839671	0.000854152	0.000786575	0.000582063	0.000768575	0.000593044	0.00117407	0.000944327	0.00102936	0.000909926	0.00116095	0.000787985	0.000690459	0.000896941	0.000850739	0.00106681	0.000981623	0.000972248	0.000694987	0.000833492	0.000914086	0.000877021	0.00120425	0.00103076	0.000700008	0.00118211	0.000814285	0.000869273	0.000655949	0.000830575	0.000824053
	Pentose and glucuronate interconversions	Carbohydrates and carbohydrate conjugates	D-lyxose	0.000342712	0.000299785	0.000230293	0.000398744	0.000387456	0.000291951	0.000397015	0.000467395	0.000349757	0.000611994	0.000288576	0.000414105	0.000515975	0.00039576	0.000254379	0.000289315	0.000361723	0.000323443	0.000679076	0.000492057	0.00040957	0.000304305	0.000219161	0.000294112	0.000228826	0.000207837	0.000221787	0.000274381	0.00032924	0.000405848	0.000331101	0.000206158	0.000354091	0.000566841	0.000300726	0.000373789	0.000266835	0.000219826	0.000294714	0.000221756	0.000196336	0.000241396	0.00032347	0.00028411	0.000596735	0.000344277
	Fructose and mannose metabolism	Carbohydrates and carbohydrate conjugates	Mannose	0.000350329	0.000318722	0.000279717	0.000330412	0.000327905	0.000364201	0.000332904	0.000369147	0.00031721	0.000297964	0.000256974	0.000340125	0.000469272	0.000338686	0.000378853	0.000298806	0.000247282	0.000355331	0.000302385	0.000390526	0.000291417	0.000396774	0.000426116	0.000439879	0.000499004	0.000417557	0.000427119	0.00034635	0.000362172	0.000538018	0.00035827	0.000293765	0.000402408	0.000308009	0.000425	0.000394446	0.000375324	0.00045003	0.000346374	0.000393565	0.000475953	0.000416308	0.000454321	0.000284429	0.000310457	0.00032591
	Fructose and Mannose Degradation	Carbohydrates and carbohydrate conjugates	L-Fucose	0.000160356	0.000322832	0.00033507	0.000277925	0.000339257	0.00015574	0.000143126	0.000332281	0.000133807	0.000446844	0.00035609	0.000197581	0.000339847	0.000136371	0.000139723	0.000148881	0.000152077	0.000161753	0.000381834	0.00033875	0.000184006	0.000121649	0.000127466	0.000206602	0.000192485	0.000238517	0.000199514	0.000117192	0.000334578	0.000276855	0.000145897	0.000146947	0.000131345	0.00033773	0.00021482	0.000141128	0.000157648	8.76424e-05	0.000120136	0.000114985	0.000196086	0.000191166	0.000297338	0.000116471	0.000283293	0.000256737
	Not Available	Carbohydrates and carbohydrate conjugates	Deoxyglucose	0.000277498	0.000275776	0.000261036	0.000222146	0.000250531	0.000237373	0.000258566	0.000240607	0.000250245	0.00028676	0.00023864	0.000262627	0.000301123	0.000223859	0.000289064	0.000268532	0.000277238	0.000287197	0.000256729	0.000311709	0.000255181	0.000337837	0.000351425	0.000375171	0.000294617	0.000323393	0.000297097	0.000309671	0.00037462	0.000350176	0.000347624	0.000344839	0.000330506	0.000314017	0.000391583	0.000365272	0.00036829	0.00037788	0.000339398	0.000296087	0.000340918	0.000316007	0.000366043	0.000273771	0.000314195	0.000370611
	Pentose phosphate pathway	Carbohydrates and carbohydrate conjugates	Ribose	0.00160477	0.00177422	0.00118071	0.00151753	0.00172775	0.00123904	0.00149563	0.00119557	0.00157021	0.00156746	0.0010864	0.00122346	0.00133737	0.00135144	0.00222674	0.00181135	0.00196245	0.00181444	0.00118531	0.00172842	0.00105603	0.00176533	0.00220326	0.00200133	0.00153368	0.00180738	0.00137619	0.00117359	0.00156645	0.0019288	0.00260418	0.0022668	0.00198545	0.00150405	0.00191832	0.00174516	0.00149545	0.00259153	0.00139643	0.00103068	0.00181787	0.00165331	0.00132464	0.00119035	0.0017313	0.00161225
	Amino sugar and nucleotide sugar metabolism	Sugar acids and derivatives	N-Acetylneuraminic acid	0.00079067	0.000797311	0.000773159	0.000661155	0.000717062	0.000705726	0.000790753	0.00100398	0.000774781	0.000796838	0.000809987	0.000768115	0.000763087	0.000603919	0.000731136	0.000882303	0.000824405	0.000812247	0.000791538	0.000871578	0.000701536	0.000606604	0.000587033	0.000506806	0.000490272	0.000542806	0.000484844	0.000474918	0.000596457	0.000536233	0.00057767	0.000574296	0.000511406	0.000589337	0.000601607	0.000706631	0.00070957	0.000482207	0.000944807	0.000850967	0.000875649	0.000843904	0.000974797	0.000728076	0.00080537	0.00100348
	Ascorbate and aldarate metabolism	Sugar acids and derivatives	Threonic acid	0.000180205	0.000155492	0.000156221	0.000162221	0.000182334	0.000166335	0.000236999	0.000197513	0.000209125	0.000226377	0.000189902	0.000246592	0.000254861	0.00025791	0.000163521	0.000154549	0.000161405	0.000143838	0.000152789	0.000203808	0.000180481	0.000291528	0.000271223	0.000230389	0.000192955	0.000248697	0.000285857	0.000226518	0.000355239	0.000345845	0.000256853	0.000293958	0.0002896	0.000328806	0.000237707	0.00025086	0.000205679	0.000271443	0.000250488	0.000205965	0.000193882	0.000256792	0.000301462	0.000273621	0.000299769	0.00032672
	Not Available	Sugar acids and derivatives	2-Keto-Gluconic acid	9.71592e-05	8.7287e-05	7.28746e-05	7.0772e-05	0.000105741	6.98063e-05	9.81776e-05	6.98268e-05	7.65493e-05	9.46813e-05	8.48904e-05	9.42287e-05	0.000106179	8.44838e-05	0.000102901	7.11951e-05	8.55753e-05	8.15021e-05	6.13646e-05	8.63955e-05	0.000102738	0.000142724	0.000148822	0.000109819	0.000135201	0.000114219	0.000124186	0.000121065	0.000147347	0.000143379	0.000129587	0.000125532	0.000129968	0.000112517	0.000123337	0.000103695	0.000131582	0.000130371	7.62477e-05	7.19641e-05	0.000101873	0.000121025	9.09016e-05	9.02294e-05	8.2269e-05	9.56966e-05
	Not Available	Sugar acids and derivatives	lactobionic acid	0.00190064	0.00170411	0.00169633	0.00171466	0.00174451	0.000928438	0.00161555	0.00143504	0.00174124	0.0016031	0.00122572	0.00128214	0.0014745	0.00157016	0.00222864	0.00156767	0.00205392	0.00173753	0.0014312	0.00215314	0.00110023	0.00137483	0.00136547	0.00174816	0.00110448	0.00152005	0.00112042	0.00095211	0.00120235	0.00163482	0.00148553	0.00118892	0.00142208	0.000953783	0.00144967	0.00148118	0.00120942	0.00168338	0.00116828	0.000809781	0.00151091	0.00118267	0.00115116	0.00110236	0.00142847	0.000750103
	Fructose and mannose metabolism	Sugar alcohols	Sorbitol	0.000340964	0.000361957	0.000302606	0.000225935	0.00030481	0.00031019	0.000370248	0.000355726	0.000372399	0.000265012	0.000265156	0.000320845	0.000415799	0.000336574	0.000188127	0.000165707	0.000214124	0.000223255	0.00020513	0.000215736	0.000213524	0.00046981	0.000562687	0.000435489	0.000321939	0.000394972	0.000444685	0.000467519	0.000382833	0.000476906	0.000241203	0.000302331	0.000306646	0.000268041	0.00034447	0.00025099	0.000295711	0.000314321	0.000484698	0.000470416	0.000510502	0.000340478	0.000422189	0.000378869	0.000276479	0.000481432
	Pentose and glucuronate interconversions	Sugar alcohols	Ribitol	0.000143017	0.000162702	0.000147601	0.000152747	0.000135614	0.000155701	0.000127174	0.000150259	0.000141888	0.000125443	0.000130017	0.000145831	0.000189266	0.000116353	0.000121818	0.000182911	0.000187324	0.000168948	0.000171449	0.000167168	0.000120831	0.00028933	0.000369032	0.000313217	0.000260259	0.00036154	0.00023941	0.000251179	0.000319097	0.000289412	0.000318964	0.000345931	0.000306234	0.000255398	0.00035665	0.000298988	0.000267204	0.00035047	0.000310676	0.000294424	0.000282481	0.000293409	0.000267699	0.00023751	0.000215586	0.000286331
	Pentose and glucuronate interconversions	Sugar alcohols	arabitol	2.99296e-05	2.46095e-05	2.29264e-05	2.38275e-05	3.33037e-05	2.68005e-05	2.29875e-05	2.23373e-05	2.24203e-05	2.98946e-05	2.25539e-05	2.72867e-05	3.32769e-05	1.91497e-05	3.11042e-05	2.37836e-05	2.93063e-05	2.65278e-05	2.68853e-05	2.67995e-05	2.70397e-05	3.9142e-05	3.88068e-05	3.63748e-05	3.55438e-05	5.30623e-05	3.14418e-05	3.63144e-05	4.02785e-05	3.91092e-05	4.12865e-05	3.80965e-05	3.50787e-05	4.00748e-05	4.68901e-05	3.22578e-05	3.69972e-05	3.98736e-05	5.64106e-05	3.83912e-05	5.60506e-05	4.1606e-05	5.87889e-05	4.35733e-05	4.16814e-05	5.90494e-05
	Not Available	Sugar alcohols	Threitol	0.000120726	0.000121269	0.000126619	9.87445e-05	0.000117428	0.000110075	0.000115091	0.000126905	0.000111214	0.000115722	0.000128948	9.98757e-05	0.000133702	0.000103845	0.00011711	9.68458e-05	0.000119244	0.000111721	8.68759e-05	0.000101597	0.000104101	0.000132656	0.000152393	0.000124086	0.000128882	0.000146296	0.00012669	0.000147984	0.000146539	0.0001471	0.00011481	0.000146519	0.000124829	0.000115754	0.000130766	0.000100504	0.000125819	0.000130421	0.000146055	0.000180862	0.000188495	0.00016595	0.000193913	0.000155721	0.000176297	0.000214554
	Steroid hormone biosynthesis	Steroids and steroid derivatives	cholesterol	0.0353706	0.0365833	0.0312108	0.0418561	0.0441911	0.0305632	0.0340535	0.0287816	0.0373049	0.0396397	0.0322118	0.0321106	0.0303472	0.0399787	0.0496423	0.0405452	0.043029	0.0378357	0.0284039	0.0351985	0.0283959	0.0350825	0.0380748	0.03861	0.0362287	0.0357065	0.0332019	0.0297941	0.0354161	0.0351823	0.0492731	0.0400635	0.0447628	0.0304269	0.0333864	0.0311899	0.0328926	0.0498182	0.0331473	0.0267703	0.0381989	0.0389798	0.0310465	0.0296758	0.0344805	0.0297264
	Inositol phosphate metabolism	Alcohols and polyols	Scyllo-Inositol	0.0038227	0.00323769	0.00181345	0.00311549	0.00327701	0.00292545	0.00378381	0.00276091	0.00222094	0.00362756	0.00331693	0.00383407	0.00359849	0.00233828	0.00339619	0.00362384	0.0036705	0.00362286	0.00344733	0.00366833	0.00353186	0.00400329	0.00412637	0.00208071	0.00356581	0.00368878	0.00258531	0.00255215	0.00390353	0.00376156	0.00379582	0.00421739	0.00397984	0.00329278	0.00389364	0.00395522	0.00409348	0.0035307	0.00312441	0.0022154	0.00195675	0.00244279	0.0027966	0.00174927	0.00238892	0.00281754
	Inositol phosphate metabolism	Alcohols and polyols	inositol	0.0476738	0.0512626	0.0378047	0.0493675	0.055122	0.0447162	0.0487325	0.0437007	0.0493432	0.0503858	0.0446002	0.0464726	0.0452439	0.0496229	0.0534152	0.0514097	0.0527634	0.0483392	0.0449831	0.0514804	0.0430994	0.0484898	0.0507739	0.0415927	0.0462485	0.0453269	0.0415171	0.0401208	0.0461813	0.0485106	0.0466131	0.0454334	0.047953	0.0413139	0.0482291	0.0490836	0.0481042	0.0505624	0.0452938	0.0359274	0.0424012	0.0452517	0.0398695	0.0333328	0.043414	0.0376373
	Inositol phosphate metabolism	Alcohols and polyols	Inositol 4-Monophosphate	0.00320218	0.00357302	0.00335027	0.00359618	0.00448671	0.0028776	0.00323477	0.00296394	0.00428922	0.00527778	0.00297523	0.003052	0.00296884	0.00339247	0.0042987	0.00353059	0.00411235	0.00361012	0.00243672	0.0041367	0.0029657	0.00338884	0.00394537	0.00392747	0.00292944	0.00360441	0.00315333	0.00286936	0.00355617	0.00376351	0.00455099	0.00343775	0.00425962	0.00250059	0.00352189	0.00266383	0.0032448	0.00425485	0.00367128	0.00257267	0.00386956	0.00363744	0.00331121	0.00268318	0.00291957	0.00342393
	Glycolysis	Organic acids and derivatives	Lactic acid	0.1573	0.133583	0.127597	0.123665	0.13509	0.143457	0.147203	0.131257	0.157517	0.109252	0.120488	0.142099	0.143765	0.13192	0.138122	0.120454	0.121053	0.128916	0.112378	0.140444	0.12122	0.156204	0.143572	0.133873	0.120896	0.128107	0.142489	0.157381	0.103588	0.138699	0.116036	0.118013	0.12558	0.101788	0.132936	0.12634	0.132523	0.13282	0.137127	0.131509	0.137228	0.14269	0.136711	0.137374	0.125582	0.130374
	Glycolysis	Organic acids and derivatives	Pyruvic acid	0.000135848	0.000105792	0.0001266	0.000103221	9.17666e-05	6.66786e-05	7.56709e-05	0.000105276	7.72884e-05	0.000111797	9.59462e-05	9.81057e-05	0.000117572	0.000114523	9.0078e-05	9.42451e-05	0.000109313	9.8082e-05	0.000147405	0.000116951	0.000146756	0.000193385	0.000166519	0.000199031	0.000149374	0.000145	0.000203412	0.000170926	0.000116443	0.000138917	0.000165551	0.000112769	0.000146854	0.000155435	0.000135919	0.00014061	0.000147804	0.000210689	0.000176129	0.000216132	0.00012383	0.000159719	0.000161107	0.000116903	0.000268571	0.000155419
3-PG	Glycolysis,Glycerolipid Metabolism,Glycine and Serine Metabolism	Organic acids and derivatives	3-Phosphoglyceric acid	7.59217e-05	5.73902e-05	6.13927e-05	5.03315e-05	5.29959e-05	2.95177e-05	2.93899e-05	4.68721e-05	3.71536e-05	8.49599e-05	6.73853e-05	5.41309e-05	6.07041e-05	7.18113e-05	3.27793e-05	5.93922e-05	6.56897e-05	7.44739e-05	5.4309e-05	4.0375e-05	6.69507e-05	8.61763e-05	6.58978e-05	0.000114881	4.88779e-05	5.9093e-05	0.000105264	6.35805e-05	6.02504e-05	0.000145054	0.000134123	5.39219e-05	0.000105489	8.37082e-05	7.19859e-05	8.94636e-05	9.86864e-05	0.000125579	3.7945e-05	7.84112e-05	3.65943e-05	5.02748e-05	7.72917e-05	5.50211e-05	9.94749e-05	9.33166e-05
	Glycolysis	Organic acids and derivatives	Fructose-6-Phosphate	2.39258e-05	3.77555e-05	2.24215e-05	4.99289e-05	6.3093e-05	5.78038e-05	6.45704e-05	0.000158468	0.000138809	9.79218e-05	0.000100571	0.000156493	0.000130077	0.000109172	2.95446e-05	2.07161e-05	9.14458e-05	5.41818e-05	3.00046e-05	6.76139e-05	4.85418e-05	3.37453e-05	2.19139e-05	3.91074e-05	2.902e-05	1.56637e-05	1.83568e-05	2.75093e-05	4.15982e-05	4.31355e-05	3.40044e-05	3.29785e-05	3.51935e-05	2.31937e-05	3.04495e-05	5.28717e-05	5.16402e-05	3.35176e-05	1.12702e-05	1.94442e-05	1.70243e-05	1.17165e-05	2.51203e-05	1.95121e-05	1.08932e-05	2.52995e-05
	Glycolysis	Organic acids and derivatives	Glucose-6-phosphate	2.75549e-05	0.000130089	0.000110144	0.000300947	0.000360149	0.000277173	0.000399943	0.000752532	0.000640555	0.000595929	0.000562465	0.000868771	0.000695805	0.000630249	0.000112836	0.000111094	0.000421101	0.000290012	8.73215e-05	0.00035327	0.000224832	0.00012086	8.59149e-05	0.000156676	7.62617e-05	6.22298e-05	9.46455e-05	0.000107345	0.000152428	0.00026952	0.000140191	9.96206e-05	0.000149262	3.75891e-05	7.39489e-05	0.000183736	0.000182545	4.41688e-05	2.75692e-05	2.48625e-05	4.05719e-05	3.12666e-05	2.5214e-05	2.02828e-05	3.74427e-05	8.16585e-05
	Glycolysis	Carbohydrates and carbohydrate conjugates	fructose	0.00010901	0.000186038	0.0001853	0.000160611	0.000151178	0.000169854	0.000183878	0.000240916	0.00026621	0.000111545	0.000115423	0.000147706	0.000182361	0.000891844	9.72981e-05	8.24645e-05	0.000121286	0.000164547	9.04593e-05	0.000132658	0.000100626	0.000158488	0.000221013	0.000607844	0.00123528	0.000148623	0.000330422	0.000229487	0.00015294	0.000551577	0.000219016	0.000128166	0.0004574	6.34473e-05	0.000191107	8.28223e-05	0.00014077	0.000233804	9.36598e-05	0.000133555	0.00152353	0.000487059	0.000119359	0.00010882	0.000101161	0.000100991
	Glycolysis	Carbohydrates and carbohydrate conjugates	Glucose	0.000141113	0.000298895	0.000258773	0.00033387	0.000213573	0.000272227	0.000287322	0.00035273	0.000416401	0.000203557	0.000295762	0.000336648	0.000263511	0.000832987	0.000129067	0.000119385	0.00023336	0.00017289	0.000189107	0.000245787	0.00019114	0.000174784	0.000254442	0.000862535	0.00205168	0.0001467	0.00031327	0.000234003	0.000172183	0.0012553	0.000253915	0.000160288	0.000290266	0.000130346	0.000206923	0.000140265	0.000167677	0.000277303	0.000180005	0.000212274	0.00180769	0.000581739	0.000133906	0.000158052	0.000109593	0.000193756
	TCA cycle	Organic acids and derivatives	2-Hydroxyglutaric acid	4.82548e-05	5.66692e-05	7.49877e-05	5.99952e-05	3.6093e-05	4.03278e-05	3.88515e-05	4.32218e-05	4.30174e-05	5.44492e-05	4.6803e-05	3.56729e-05	4.04885e-05	5.51492e-05	5.5046e-05	5.42132e-05	4.8751e-05	4.94268e-05	6.47438e-05	5.36869e-05	7.21724e-05	4.6885e-05	0.000112649	6.88299e-05	6.64657e-05	0.000103008	0.000102026	5.70158e-05	4.42768e-05	4.35925e-05	8.88756e-05	0.000100499	6.46284e-05	9.94448e-05	5.33369e-05	5.92543e-05	5.53112e-05	7.82823e-05	4.52795e-05	0.000104903	4.69816e-05	6.60774e-05	7.11241e-05	0.000112148	6.31033e-05	6.08429e-05
	TCA cycle	Organic acids and derivatives	citric acid	0.00886501	0.00961692	0.00715215	0.00889478	0.00815618	0.00680951	0.010362	0.0102261	0.00836701	0.0138511	0.00984752	0.00987174	0.0116413	0.00793801	0.00890556	0.00922733	0.00991694	0.00884096	0.0122656	0.00919369	0.013694	0.00930531	0.013042	0.00844921	0.0104642	0.00966432	0.0101517	0.00978569	0.0135267	0.0142885	0.0128197	0.0112678	0.0116337	0.0183853	0.0132847	0.0120922	0.0123172	0.00958133	0.00994694	0.00836709	0.0107718	0.0112953	0.012181	0.00987373	0.0104409	0.0140716
	TCA cycle	Organic acids and derivatives	Fumaric acid	0.00231506	0.00230753	0.00224447	0.00191037	0.00284183	0.00297681	0.0027667	0.00389011	0.00305364	0.00350424	0.00286294	0.0033905	0.00366697	0.0029889	0.00310698	0.00308931	0.0035301	0.00381775	0.00192668	0.00264336	0.00282744	0.00350373	0.00221129	0.00318324	0.00136126	0.0025442	0.00290016	0.00297033	0.00231731	0.00281623	0.00324185	0.00242771	0.00309494	0.00170796	0.0030382	0.00333361	0.00344691	0.00332828	0.00275567	0.00247536	0.00210104	0.00212048	0.00312625	0.00288629	0.00371418	0.00354845
	TCA cycle	Organic acids and derivatives	Malic acid	0.00448117	0.00459847	0.00434809	0.00395412	0.00385977	0.00460151	0.00490165	0.00532663	0.00468182	0.00385142	0.00418067	0.00475971	0.00453688	0.00398524	0.00448914	0.00458409	0.00460369	0.00490258	0.00409655	0.00468807	0.00561395	0.00365385	0.00368419	0.00326334	0.00273728	0.00310677	0.00317288	0.0036827	0.0034127	0.00298978	0.00351998	0.00395133	0.00356459	0.00239531	0.00377193	0.00427524	0.00419202	0.00351156	0.00385882	0.00376895	0.00424219	0.00350673	0.00382638	0.00385684	0.00358989	0.00436336
	TCA cycle	Organic acids and derivatives	Succinic acid	0.000971973	0.00105641	0.000685997	0.000699738	0.000623148	0.000705531	0.000658509	0.000704752	0.000695226	0.000664526	0.000716068	0.000656798	0.00057898	0.000701052	0.000618849	0.000817532	0.000648961	0.000836272	0.000889814	0.000918169	0.000671519	0.000343169	0.000371041	0.000388117	0.000420575	0.000534852	0.000319295	0.000272193	0.000398413	0.000322711	0.000421637	0.000582605	0.000409749	0.000422243	0.00035288	0.000415384	0.000450939	0.000504999	0.000620317	0.00109013	0.000825576	0.000622306	0.000671348	0.000359395	0.000379053	0.000412639
	Glycerolipid Metabolism,Glycine and Serine Metabolism	Organic acids and derivatives	Glyceric acid	1.37999e-05	1.25691e-05	1.03973e-05	1.42823e-05	1.36953e-05	1.298e-05	1.11878e-05	1.17861e-05	1.23928e-05	1.85529e-05	1.23273e-05	1.30639e-05	1.31957e-05	1.27195e-05	1.88878e-05	1.4448e-05	1.41311e-05	1.04485e-05	9.85918e-06	1.66289e-05	1.56651e-05	1.31184e-05	1.78301e-05	1.11319e-05	1.57882e-05	1.24257e-05	1.86768e-05	1.6707e-05	1.68993e-05	1.19482e-05	2.01855e-05	1.67676e-05	1.47978e-05	1.96171e-05	1.8582e-05	2.0463e-05	2.11031e-05	1.03532e-05	7.03641e-06	1.40945e-05	1.1251e-05	6.34362e-06	6.07385e-06	8.64698e-06	9.77657e-06	8.51939e-06
	Glycerolipid Metabolism	sugar alcohols	Glycerol	0.00595238	0.00657529	0.00579863	0.00711283	0.00746101	0.00628898	0.00640936	0.00770616	0.00755386	0.00861486	0.00596989	0.00837712	0.00829555	0.00745882	0.00663345	0.00592064	0.00736525	0.00659402	0.00647037	0.00740365	0.00698306	0.00781467	0.00853762	0.0078404	0.00761989	0.00781586	0.00715887	0.00854041	0.00884656	0.00946103	0.0082023	0.00859772	0.00835533	0.0076459	0.00918171	0.00877142	0.00819341	0.00808393	0.00833376	0.00799652	0.00870787	0.0103608	0.00888252	0.00744541	0.00968099	0.00875821
	Glycerolipid Metabolism	Glycerophosphates	Glycerol 2-Phosphate	0.000270688	0.000394666	0.000250601	0.000264164	0.000246124	0.000330774	0.000279215	0.000253683	0.00031923	0.000237057	0.000286733	0.000259761	0.000304479	0.000273892	0.000315316	0.000290448	0.000305593	0.000278021	0.000269113	0.000322165	0.000192171	0.000335064	0.000480409	0.000479681	0.000375541	0.00037091	0.000333095	0.00034206	0.000369381	0.000336444	0.000334231	0.000517462	0.000401949	0.000174212	0.000304362	0.00030619	0.000337917	0.000410579	0.000292429	0.000388455	0.000312961	0.000352962	0.000441348	0.000206851	0.000292431	0.000345208
	Glycerolipid Metabolism	Glycerophosphates	Glycerol-3-Phosphate	0.00484407	0.00725676	0.00295126	0.00204912	0.00211521	0.00449095	0.00318657	0.00228435	0.00393757	0.00191275	0.00236005	0.00307984	0.00376599	0.00244928	0.00493866	0.00425326	0.00326994	0.00437477	0.00314753	0.00334946	0.00151338	0.00534088	0.0082358	0.00593733	0.00591931	0.00689223	0.00368285	0.00439261	0.00563909	0.00568124	0.00516601	0.00805882	0.00509654	0.00138549	0.00444586	0.00419852	0.00494533	0.0070318	0.00402113	0.00476894	0.0051582	0.0042579	0.00397751	0.00183329	0.00296513	0.00426244
	Glycerolipid Metabolism	Organic acids and derivatives	Glycerophosphoric acid	0.000235091	0.000238982	0.00017954	0.000170985	0.000228552	0.000308274	0.00030312	0.000196387	0.000287226	0.000237787	0.00016628	0.000279357	0.000262917	0.00019267	0.000264458	0.000237324	0.000248489	0.000259147	0.000132663	0.000248005	0.000178552	0.000307739	0.000407415	0.000276126	0.000228908	0.000276867	0.000246282	0.000219849	0.0003059	0.000339752	0.000263987	0.000317557	0.000279598	0.000141791	0.000268313	0.000257674	0.00030535	0.000299002	0.000232202	0.000194528	0.000216065	0.00023512	0.000344766	0.000170628	0.000209524	0.000260255
	Ascorbate and aldarate metabolism	vitamin	L-Ascorbic acid	0.00117702	0.00127599	0.00113185	0.000863073	0.000918112	0.00106092	0.00106905	0.00093054	0.00106509	0.000969086	0.000950507	0.00232129	0.00132291	0.000748761	0.00101535	0.00127189	0.00116738	0.00111354	0.00105868	0.00101601	0.000938856	0.00239525	0.00344423	0.00219447	0.00214052	0.00245074	0.00171934	0.00199519	0.00273801	0.00217244	0.00243399	0.00278096	0.00238058	0.00200329	0.00326156	0.00256829	0.00244669	0.00275259	0.00245688	0.00211038	0.00204685	0.00259264	0.00232269	0.00169302	0.00169718	0.00285751
	Ubiquinone and other terpenoid-quinone biosynthesis,Vitamin digestion and absorption	vitamin	α-Tocopherol	0.000346027	0.000352128	0.000312835	0.000396305	0.000407594	0.000265405	0.000271065	0.000242424	0.000300358	0.00031848	0.000227455	0.000286647	0.000240687	0.000316345	0.000329901	0.000251506	0.000306103	0.000274725	0.000219836	0.00024739	0.000246367	0.00023707	0.000241477	0.000337161	0.000168005	0.000222165	0.000228302	0.000188762	0.000215987	0.00026754	0.000249891	0.000242049	0.000286962	0.000151107	0.000215846	0.00016931	0.000230822	0.000273256	0.000351503	0.000261416	0.000375626	0.00037775	0.000281534	0.000306197	0.000349814	0.000237491
	Pantothenate and CoA biosynthesis, Beta-Alanine Metabolism	vitamin	Pantothenic acid	0.00038447	0.000383803	0.000442802	0.000331833	0.000309189	0.000304032	0.000315466	0.000289368	0.000282914	0.000271036	0.000222425	0.000456773	0.000362728	0.000328595	0.000224834	0.000195425	0.000220273	0.000241628	0.000360278	0.000268369	0.000322048	0.000795936	0.000855556	0.000897633	0.000831251	0.000753254	0.000575084	0.000617275	0.000557065	0.000685554	0.000512089	0.0005144	0.000659178	0.00063939	0.000597302	0.000716442	0.000616195	0.000499115	0.000429201	0.000317126	0.000315552	0.000383823	0.000425057	0.000252323	0.000289013	0.000293333
	Nicotinate and nicotinamide metabolism	Organic acids and derivatives	3-Hydroxymethylglutaric acid	0.000129172	0.00012312	8.66379e-05	9.20179e-05	0.000118404	0.000119029	0.000102242	0.000114792	0.000113038	0.000123229	0.000108587	0.000106176	0.000131765	9.23221e-05	0.000127132	0.000126786	0.000130405	0.000123129	0.000123453	0.000134107	0.000126518	0.000117341	9.04896e-05	0.000116269	8.01883e-05	9.80499e-05	6.55572e-05	8.56713e-05	9.54867e-05	9.20383e-05	0.000132142	0.000124462	0.000103447	9.97131e-05	0.000116601	0.000111026	0.000132156	0.000105568	0.00016311	0.000111436	0.000164697	0.000129401	0.000162232	9.87072e-05	0.000137784	0.000192997
	Nicotinate and Nicotinamide Metabolism	Amines	Nicotinamide	0.00470132	0.00471412	0.00420891	0.00401534	0.00406576	0.00453823	0.00460406	0.0047137	0.00414206	0.00473005	0.00452056	0.00469972	0.00498341	0.00367669	0.00426078	0.00488405	0.00447613	0.00458497	0.00477121	0.00477139	0.00452875	0.00517992	0.00544475	0.00495535	0.0047281	0.00476454	0.00449808	0.00485364	0.00576072	0.00530096	0.0053303	0.00556734	0.00477273	0.00506897	0.00509913	0.00533543	0.00523823	0.00486038	0.00371857	0.00398526	0.00407338	0.00389376	0.00438313	0.00406557	0.00417241	0.0049504
	Phospholipid Biosynthesis	Amines	O-Phosphoethanolamine	0.00292642	0.003068	0.00314071	0.00261518	0.00248291	0.00290962	0.00306656	0.00253768	0.00253519	0.00292887	0.00273903	0.00301249	0.0030704	0.00275985	0.0031873	0.00353882	0.00345151	0.00303468	0.0029401	0.00323729	0.00266401	0.00265186	0.00253656	0.00258404	0.00217527	0.00247881	0.00223373	0.00195682	0.00300478	0.00302703	0.00289761	0.0030955	0.00262067	0.00247169	0.00279255	0.00303473	0.00333528	0.00298548	0.00684575	0.00601712	0.00639159	0.00727039	0.00735939	0.00487464	0.00596562	0.0072545
EPA	Not Available	Amines	Palmitoylethanolamide	0.000630941	0.000780031	0.000559173	0.000681572	0.000630986	0.000433128	0.000466721	0.000361574	0.000662285	0.000594605	0.000521891	0.000454519	0.000440272	0.000700347	0.000622633	0.000495765	0.00054712	0.000516875	0.000398248	0.000479008	0.000488195	0.00049914	0.000564985	0.000411792	0.00060858	0.000429679	0.000528693	0.000534799	0.000433216	0.000402257	0.000615827	0.00111555	0.000673723	0.000361049	0.000453709	0.000731946	0.000409061	0.000582437	0.000437311	0.000361124	0.000563916	0.00063987	0.00203851	0.000382667	0.00390204	0.00137773
	Sphingolipid Metabolism	Amines	O-phosphocolamine	0.000190465	0.000169407	0.00013322	0.000157105	0.000187466	0.000211413	0.000218425	0.000227841	0.00019651	0.000200339	0.000165487	0.000193388	0.00017795	0.000154347	0.000184892	0.000197248	0.000178645	0.000190867	0.0002361	0.00024493	0.000190043	0.000123804	0.000141927	0.000117143	0.000109556	0.000129519	0.00012797	0.000118425	0.000160937	0.000127861	0.000130801	0.000134826	0.000106567	0.000157384	0.000159542	0.000140481	0.000162939	0.0001226	0.000127311	0.000134155	0.000137717	0.000136918	0.000157901	0.000155495	0.000142888	0.000169491
	beta-Alanine metabolism	Amino acids, peptides, and analogues	β-Alanine	0.00094332	0.000999979	0.0011397	0.00127316	0.000758957	0.00141044	0.00110663	0.00130434	0.00112919	0.00127084	0.00118205	0.00113839	0.00115313	0.0012945	0.000921198	0.00106786	0.000919215	0.00107905	0.00155136	0.000926033	0.0012473	0.000638728	0.000733066	0.000620566	0.000915039	0.00106918	0.000720413	0.00075437	0.000849611	0.000876442	0.000943627	0.000832342	0.000659269	0.00123388	0.000767775	0.00114921	0.0011271	0.000835136	0.000790026	0.000743406	0.000516298	0.000645198	0.000788364	0.000901467	0.000910383	0.000670893
	Alanine metabolism, urea cycle	Amino acids, peptides, and analogues	Alanine	0.013763	0.0131612	0.00961528	0.00802777	0.0126991	0.0230045	0.0174857	0.0218361	0.0138039	0.0144696	0.00952766	0.0166567	0.0185939	0.0109944	0.0128701	0.0117311	0.0115602	0.0122504	0.0148349	0.01519	0.0131622	0.0184676	0.0144088	0.012492	0.00787799	0.0194662	0.0111765	0.0155947	0.016155	0.0146577	0.0145202	0.0150167	0.0124922	0.0149862	0.0176202	0.0148861	0.0151422	0.0163647	0.0225067	0.0178097	0.0201524	0.0189815	0.0210019	0.0203772	0.0259358	0.024021
	Alanine Metabolism	Organic acids and derivatives	Pyrophosphate	0.00177192	0.00265689	0.00503697	0.005167	0.00250353	0.00165053	0.00185041	0.00141684	0.00253086	0.00317409	0.00347804	0.00217164	0.00133568	0.00437638	0.0026116	0.00333832	0.00322469	0.00203603	0.00293447	0.00226559	0.00356182	0.00202196	0.00215687	0.0034113	0.00410944	0.00220702	0.00354707	0.00317001	0.00460264	0.00229249	0.00223818	0.00228104	0.00484133	0.00302617	0.00266785	0.00164232	0.00334904	0.00330655	0.00228554	0.00348144	0.00203332	0.00253408	0.00254502	0.00304188	0.0012978	0.00156615
	Alanine, aspartate and glutamate metabolism	Amino acids, peptides, and analogues	N-Acetylaspartylglutamic acid	0.00168849	0.00196251	0.00432249	0.00265026	0.00181023	0.00157837	0.00125771	0.00203675	0.00187544	0.00169039	0.00402714	0.00262625	0.00215763	0.00226651	0.00149078	0.0021086	0.00221918	0.00151734	0.00386591	0.00192462	0.00535017	0.00154418	0.000906369	0.00110896	0.00178598	0.000909709	0.00138692	0.0016995	0.00129841	0.00112997	0.000955487	0.00100013	0.00116203	0.00183859	0.000966333	0.00106304	0.00174688	0.000548274	0.000822127	0.000851876	0.000438154	0.000569255	0.000282097	0.000389659	0.000199337	0.000493469
	Arginine and proline metabolism	Amino acids, peptides, and analogues	Proline	0.000430148	0.000222279	0.000419557	0.000513334	0.000296024	0.00036815	0.00055122	0.000281523	0.000300851	0.000414051	0.000485609	0.000246128	0.000600002	0.000413009	0.000364528	0.000197492	0.000236446	0.000280336	0.000385603	0.000332028	0.000538516	0.000453065	0.000511026	0.000432712	0.000652959	0.000547622	0.000644557	0.000532124	0.000352816	0.000426784	0.000480661	0.000466517	0.000571079	0.000403359	0.000292717	0.000620661	0.000381087	0.000545295	0.00036649	0.000412289	0.000469112	0.000695405	0.000589689	0.000398851	0.000545049	0.000475327
	Arginine and Proline Metabolism, Aspartate Metabolism	Amino acids, peptides, and analogues	Aspartic acid	0.061401	0.0631069	0.0756584	0.0707948	0.0608083	0.0701878	0.061771	0.0785948	0.0623325	0.0747721	0.084144	0.0650522	0.0615476	0.0705498	0.0558487	0.062917	0.0670409	0.0605692	0.0736323	0.0643247	0.0912356	0.0462223	0.0380109	0.047204	0.0529785	0.0536576	0.0533554	0.0576298	0.0521676	0.0480375	0.0498597	0.0480348	0.0432662	0.0604678	0.0460332	0.057942	0.0548114	0.0390979	0.0455127	0.0486875	0.0465255	0.0413465	0.0446803	0.0666743	0.04838	0.0516091
	Arginine and Proline Metabolism	Amino acids, peptides, and analogues	Citrulline	6.714e-05	7.20021e-05	3.46514e-05	4.17811e-05	9.02882e-05	0.000104407	8.5351e-05	0.000127232	8.23145e-05	0.000103604	4.30993e-05	0.000111591	9.42687e-05	4.45887e-05	7.13923e-05	7.69298e-05	7.87766e-05	6.47762e-05	5.61286e-05	7.69498e-05	5.4096e-05	9.4218e-05	6.31977e-05	8.47774e-05	4.10656e-05	5.68669e-05	4.4301e-05	4.67519e-05	0.000101277	9.54552e-05	8.25517e-05	7.62787e-05	8.4267e-05	6.57541e-05	8.54149e-05	8.30595e-05	9.74969e-05	7.52037e-05	7.06225e-05	4.09631e-05	5.63688e-05	5.81761e-05	6.05698e-05	4.26522e-05	8.51405e-05	7.69677e-05
	Arginine and proline metabolism	Organic acids and derivatives	Creatinine	0.0032358	0.00469273	0.0014427	0.0013491	0.00442658	0.00332666	0.00376504	0.00327273	0.00320406	0.00444742	0.00138555	0.00353785	0.00274423	0.00160432	0.00431632	0.00529871	0.00490408	0.00424291	0.00150199	0.00378515	0.00158616	0.00370863	0.00237127	0.003594	0.00124508	0.00327507	0.00148795	0.00141581	0.00465045	0.00391527	0.00373275	0.00432219	0.00702403	0.00197393	0.00656568	0.00327544	0.00379229	0.00467648	0.00270878	0.00134618	0.00304358	0.00227715	0.00234449	0.00150254	0.00248947	0.0030109
	Aspartate Metabolism	Amino acids, peptides, and analogues	N-acetyl-L-aspartic acid	0.0686893	0.0691264	0.066988	0.0648999	0.0651112	0.0661622	0.0652874	0.0598003	0.0690093	0.0587177	0.0638128	0.0648976	0.0621772	0.0677895	0.0708051	0.067269	0.0665377	0.0662067	0.0660596	0.068506	0.0593328	0.0676384	0.0695626	0.0662163	0.0672176	0.0685123	0.0654216	0.0671284	0.0676352	0.0638712	0.0669107	0.0679086	0.0635347	0.0675343	0.0722589	0.0689413	0.070856	0.0706156	0.068926	0.0699154	0.0703812	0.0690786	0.0638264	0.0734379	0.0613114	0.0631317
	Aspartate Metabolism, Protein digestion and absorption	Amino acids, peptides, and analogues	Asparagine	0.000308593	0.000310215	0.000156539	0.000196163	0.0003551	0.000299262	0.000210078	0.000500828	0.00027439	0.000300269	0.000120656	0.00023633	0.00028108	0.000161552	0.000383792	0.000308675	0.000301045	0.000388032	0.000149633	0.000305537	0.000142216	0.000393211	0.000408308	0.00039235	0.000170152	0.000404909	0.000161747	0.000139613	0.000348582	0.000392289	0.000511429	0.000362528	0.000403784	0.00019492	0.000449806	0.000379805	0.000272987	0.000561756	0.000347825	0.00014398	0.000472203	0.000407752	0.00035234	0.000143014	0.000451841	0.00041357
	Arginine and ornithine metabolism	Amino acids, peptides, and analogues	Ornithine	0.000183408	0.000190267	0.000213706	0.000223282	0.000240573	0.000443488	0.000283433	0.000507802	0.000243617	0.000297371	0.000243007	0.000285931	0.000289078	0.000211515	0.000181715	0.000242259	0.000351165	0.000203276	0.000408627	0.000240778	0.000298285	0.000202621	0.000160962	0.000243872	0.000181012	0.00029844	0.000417649	0.000256389	0.000312597	0.00023681	0.000291454	0.000193117	0.000196019	0.000394936	0.000235833	0.000179553	0.000226085	0.000182982	0.000252257	0.000211777	0.00018654	0.000151253	0.000201056	0.000250274	0.000320576	0.000261307
	GABAergic synapse, Glutamate Metabolism	Amino acids, peptides, and analogues	γ-aminobutyric acid(not sure)	0.00973003	0.00798399	0.0167398	0.0136675	0.00656064	0.0179459	0.0116332	0.0169856	0.0111231	0.0118185	0.0139337	0.00869856	0.0134746	0.0173702	0.00865471	0.0114637	0.0108792	0.012898	0.0182936	0.0101325	0.0189951	0.00528888	0.0101243	0.00876254	0.0125794	0.0170765	0.0113014	0.014584	0.00937365	0.0111454	0.00933375	0.0102048	0.00729321	0.0201739	0.00929699	0.0141154	0.0122811	0.00677205	0.00993782	0.0100573	0.00434547	0.00509223	0.0129368	0.0131472	0.0168961	0.00861707
	GABAergic synapse, Glutamate Metabolism	Amino acids, peptides, and analogues	γ-aminobutyric acid	0.000158766	0.000163327	0.000143169	0.00012892	0.000173687	0.000116565	0.000161983	0.000171071	0.000158741	0.000158213	0.000133057	0.000166375	0.000163661	0.000131372	0.000130193	0.000165685	0.00016586	0.000208177	0.000203292	0.000135096	0.000142382	0.000201682	0.000204834	0.000184181	0.000165551	0.000187802	0.000209305	0.000198296	0.000221305	0.000198658	0.000184203	0.00020558	0.000243303	0.000230166	0.000191107	0.000258213	0.000203689	0.000187128	0.000169927	0.000150358	0.000179107	0.000171797	0.000214647	0.000145175	0.00015957	0.000207483
	Glutamine and glutamate metabolism	Amino acids, peptides, and analogues	Glutamic acid	0.0370737	0.040242	0.0419296	0.0331458	0.0378265	0.0476102	0.0372931	0.0436071	0.0362671	0.0367545	0.0396776	0.0354551	0.0370989	0.0304154	0.0352565	0.0378325	0.0374465	0.0385427	0.0425625	0.0343208	0.0344809	0.03923	0.0411115	0.0491188	0.0470262	0.0601134	0.0554015	0.0497442	0.0535567	0.0442639	0.0362426	0.0424798	0.0412301	0.0509424	0.0464935	0.0455144	0.0415744	0.0419657	0.052578	0.0643344	0.0528185	0.0534153	0.0587621	0.0562612	0.0614811	0.0559864
	Glutamine and glutamate metabolism	Amino acids, peptides, and analogues	Glutamine	0.00219001	0.00352363	0.00154305	0.0014238	0.00396895	0.0067241	0.00272883	0.0054711	0.00381603	0.00200248	0.000997733	0.003499	0.0021449	0.000659044	0.00323221	0.00552921	0.00414059	0.0025503	0.00215446	0.00231385	0.000804888	0.00215123	0.00178096	0.00526861	0.000908903	0.00229087	0.00108947	0.000873785	0.00212182	0.00248784	0.00245847	0.00150928	0.00211897	0.0023735	0.00301085	0.00193133	0.00149986	0.00298089	0.0029542	0.00202101	0.00355937	0.00272216	0.00188033	0.0018692	0.00605641	0.00191015
	Glutathione metabolism	Amino acids, peptides, and analogues	Glutathione	0.000677941	0.000379717	0.000502623	0.000470274	0.000411415	0.000552	0.000509003	0.000335369	0.000389078	0.000270489	0.000585683	0.000474915	0.000712491	0.000406367	0.000595687	0.000454644	0.000495631	0.000539274	0.000437926	0.000438568	0.000342902	0.00150358	0.00153428	0.00118702	0.0012279	0.0017087	0.00137772	0.00119438	0.00114913	0.00105022	0.00128516	0.00119027	0.00111791	0.000710581	0.00152859	0.00105748	0.00133212	0.00146552	0.00126391	0.00177954	0.00139302	0.0015573	0.000390545	0.00114155	0.000227596	0.000944687
	Glutathione Metabolism	Amino acids, peptides, and analogues	Pyroglutamic acid	0.154084	0.169496	0.211726	0.159755	0.163071	0.154846	0.16173	0.150319	0.154008	0.158242	0.16694	0.158292	0.159247	0.153845	0.156855	0.15645	0.152528	0.152553	0.155071	0.149632	0.151091	0.193423	0.209117	0.223038	0.209748	0.187488	0.21129	0.193135	0.197025	0.194125	0.185853	0.195023	0.195987	0.186646	0.193769	0.182199	0.185181	0.19898	0.192004	0.21114	0.20167	0.196729	0.198882	0.190486	0.18162	0.190796
	Cysteine and methionine metabolism, Glutathione Metabolism	Amino acids, peptides, and analogues	Cysteine	0.00236036	0.00195478	0.000909091	0.00212579	0.00265208	0.00256974	0.0024443	0.00335723	0.00198289	0.00325743	0.0017063	0.00259337	0.00251572	0.00154948	0.00217871	0.0020459	0.00218294	0.00210414	0.00327507	0.00192102	0.00193053	0.0012997	0.00134947	0.00115862	0.0009033	0.00159869	0.000688614	0.00081472	0.00197981	0.00201318	0.00254492	0.00154367	0.00152573	0.00316027	0.00212043	0.00281501	0.00205607	0.00159435	0.00162324	0.00102019	0.00112667	0.0013981	0.00175964	0.00177026	0.00285177	0.00152495
	Cysteine and methionine metabolism, Sulfur metabolism	Amino acids, peptides, and analogues	Homocysteine	0.00042242	0.000150349	0.000143299	0.000240147	9.63409e-05	3.92331e-05	8.36466e-05	0.000109144	7.10797e-05	9.0779e-05	0.000132744	0.000112181	5.88053e-05	8.37563e-05	0.000116417	6.36155e-05	0.000175304	0.0116159	0.000164802	0.00025409	0.000142565	0.000128198	0.000117402	7.99394e-05	0.000108083	3.54153e-05	7.37659e-05	8.42299e-05	0.000125523	7.7239e-05	9.59448e-05	0.000128809	8.25004e-05	7.34257e-05	7.25881e-05	0.00176586	0.000129777	0.000104227	0.000142795	6.80204e-05	0.000940087	0.000176583	8.00099e-05	5.44196e-05	5.19138e-05	6.05325e-05
	Cysteine and methionine metabolism	Amino acids, peptides, and analogues	Methionine	0.000655651	0.00104764	0.00176537	0.000892964	0.000457187	0.000623702	0.000531903	0.000836651	0.000543187	0.000527354	0.000433333	0.000606018	0.00056496	0.000532506	0.000348731	0.000392473	0.000472776	0.000386509	0.000690699	0.000587437	0.000798453	0.000801653	0.00119897	0.00181003	0.00106468	0.000620517	0.000727737	0.000749889	0.000486966	0.000543916	0.000531742	0.000566587	0.000592737	0.000884739	0.000715486	0.000806553	0.000716215	0.000562674	0.000995414	0.0015841	0.00121445	0.00105796	0.000616852	0.000749355	0.00051066	0.000528754
	Cysteine and methionine metabolism	Amino acids, peptides, and analogues	O-succinylhomoserine	6.65799e-05	5.53715e-05	3.79053e-05	3.71861e-05	5.27448e-05	5.46175e-05	5.71847e-05	4.77256e-05	4.5087e-05	4.74662e-05	4.18647e-05	3.91496e-05	3.99899e-05	3.82524e-05	6.48654e-05	5.97479e-05	4.9888e-05	5.64133e-05	7.05925e-05	6.73503e-05	2.62747e-05	6.00888e-05	6.60317e-05	6.38798e-05	3.60142e-05	6.63784e-05	4.43386e-05	4.48242e-05	5.38885e-05	5.1645e-05	8.00179e-05	5.98323e-05	3.77171e-05	6.88478e-05	5.46976e-05	4.86454e-05	3.62383e-05	9.34522e-05	6.28308e-05	7.8737e-05	6.14375e-05	6.93508e-05	6.78622e-05	5.17315e-05	7.11935e-05	5.71524e-05
	Cysteine and methionine metabolism	Nucleosides, nucleotides, and analogues	5'-methylthioadenosine	6.97162e-05	8.25525e-05	4.57219e-05	4.81051e-05	9.58947e-05	8.68914e-05	8.58098e-05	8.2412e-05	6.95275e-05	7.47136e-05	5.00645e-05	8.05116e-05	7.16941e-05	4.93057e-05	8.03742e-05	9.60233e-05	9.26988e-05	9.3619e-05	7.49186e-05	9.64124e-05	6.12468e-05	6.74692e-05	8.6986e-05	7.16968e-05	3.68322e-05	6.24322e-05	4.88384e-05	3.59149e-05	7.25014e-05	7.08841e-05	7.74202e-05	7.57006e-05	7.7912e-05	6.26962e-05	7.08705e-05	9.51777e-05	7.11026e-05	7.7463e-05	5.28526e-05	5.31886e-05	5.4005e-05	4.54438e-05	6.17508e-05	5.1224e-05	6.87094e-05	5.90839e-05
	Valine, leucine and isoleucine degradation,Valine, leucine and isoleucine biosynthesis	Amino acids, peptides, and analogues	Isoleucine	0.000834534	0.000815311	0.00108154	0.00100483	0.000986281	0.0012503	0.00110843	0.00147475	0.000872741	0.00103709	0.00127973	0.0013179	0.00164588	0.00114138	0.00130944	0.000976504	0.000961608	0.00125379	0.00173152	0.00126109	0.00164237	0.00134981	0.00110279	0.000964805	0.00113865	0.00135782	0.00133991	0.00181082	0.00110208	0.00139281	0.00149145	0.00143381	0.00129404	0.00191061	0.00134823	0.00136981	0.00139894	0.00142736	0.000915131	0.0011784	0.000812461	0.000987076	0.00118701	0.00130645	0.00152881	0.00134927
	Valine, leucine and isoleucine degradation,Valine, leucine and isoleucine biosynthesis	Amino acids, peptides, and analogues	Leucine	0.00092085	0.0011374	0.00150692	0.00165492	0.0014546	0.0016558	0.00142866	0.00198604	0.00117285	0.00119841	0.0015159	0.00162131	0.00179661	0.00187411	0.0017269	0.000965057	0.00104656	0.00130725	0.00179745	0.00132003	0.00151788	0.00147129	0.00115014	0.00124606	0.00147112	0.0014445	0.00163217	0.00202206	0.000969679	0.00154352	0.00129911	0.0012086	0.00126758	0.00175031	0.00126003	0.00120471	0.00117915	0.00158221	0.00103018	0.00134081	0.00106537	0.00111754	0.00103383	0.00165941	0.00217518	0.00114313
	Valine, leucine and isoleucine degradation,Valine, leucine and isoleucine biosynthesis	Amino acids, peptides, and analogues	Valine	0.00178321	0.00180123	0.00185259	0.00179389	0.00205384	0.0023994	0.00222988	0.00284087	0.00179012	0.00222913	0.00213757	0.00245247	0.00338533	0.00190206	0.00258361	0.00181068	0.00202476	0.00248571	0.00245172	0.00235238	0.00235536	0.00246782	0.00187959	0.0018554	0.00191726	0.00264725	0.00192556	0.00248864	0.00229775	0.00287932	0.00251183	0.00252917	0.00233468	0.00256852	0.0024013	0.00249966	0.00239216	0.00274132	0.00209981	0.00189946	0.00193011	0.00251133	0.00285749	0.00216067	0.00340261	0.00337183
	Lysine degradation, Lysine biosynthesis	Amino acids, peptides, and analogues	Lysine	0.00169093	0.0019361	0.00118815	0.00134081	0.00147223	0.00253793	0.00147592	0.00250667	0.00181375	0.00187008	0.00121889	0.00170058	0.00186568	0.00111322	0.00140009	0.00244399	0.00154291	0.00142276	0.00179068	0.00184901	0.000922293	0.00164878	0.00134241	0.00199743	0.000767096	0.00120515	0.000997403	0.000987678	0.00174775	0.0015828	0.00171512	0.00108643	0.00111951	0.0013389	0.00159	0.00104172	0.00103063	0.00143041	0.00171225	0.0011303	0.00174655	0.0012457	0.00100835	0.000860525	0.00223918	0.00138478
	Lysine Degradation	Amino acids, peptides, and analogues	2-Aminoadipic acid	0.000109996	0.000246504	0.00012185	0.000158432	0.00013302	0.000266812	0.000156717	0.000309508	0.000327336	0.000276468	0.000213267	0.000191028	0.000227453	0.000297829	0.000192892	0.000115184	0.00024886	0.00014436	0.000247631	0.000187135	0.000324011	0.000218704	0.000238955	0.00026412	0.000290056	0.000342173	0.000566819	0.000649734	0.000736536	0.000346694	0.000240416	0.000365932	0.000382998	0.000819664	0.00076744	0.000406716	0.000465438	0.000452339	0.000281794	0.000328134	0.000363215	0.000286095	0.000283821	0.000246138	0.000521235	0.000457236
	Lysine degradation	Amino acids, peptides, and analogues	N-Acetyl-lysine	0.000367153	0.000317713	0.000409253	0.000304642	0.000239904	0.000288941	0.000270977	0.000241243	0.00028119	0.000147168	0.000274848	0.000292863	0.000214411	0.000236907	0.000335042	0.000406121	0.00028645	0.000377834	0.000253089	0.00027441	0.000252104	0.000161261	0.000120906	0.00012823	0.000124812	9.5844e-05	0.00010903	0.000140499	5.12886e-05	0.000106359	0.000123306	0.000141251	0.000171264	5.78858e-05	0.000120103	0.000156308	0.000221593	8.69224e-05	0.000174916	0.000148386	0.000182767	0.00016306	0.000142229	0.00012931	0.000112214	0.000182753
	Lysine degradation	Amino acids, peptides, and analogues	Pipecolic acid	0.0238245	0.022795	0.0199085	0.0209478	0.0274985	0.0199161	0.0224573	0.0200506	0.0232481	0.0222259	0.0216972	0.0202924	0.0204357	0.0235514	0.024812	0.0203418	0.0233912	0.0218639	0.019479	0.0214947	0.0212239	0.0219382	0.0235518	0.0224472	0.0263471	0.0305821	0.0252975	0.0285449	0.0250153	0.0240973	0.0212492	0.0220488	0.0225457	0.0203852	0.0235548	0.0252707	0.0206425	0.0251292	0.0270856	0.0258047	0.0266552	0.0265019	0.0311493	0.0261609	0.0287199	0.0254797
	Glycine, serine and threonine metabolism, Primary bile acid biosynthesis	Amino acids, peptides, and analogues	Glycine	0.101187	0.107099	0.0822045	0.104388	0.0959826	0.105763	0.111734	0.11008	0.107243	0.10873	0.113848	0.109416	0.0931287	0.107168	0.0991972	0.116891	0.0977781	0.112341	0.117615	0.119337	0.107457	0.0337624	0.0296707	0.0324686	0.0309949	0.0287924	0.0274752	0.0267513	0.0337388	0.0364718	0.0446896	0.0386525	0.0347991	0.0515967	0.0288814	0.0433391	0.0416965	0.0286356	0.0262361	0.0231646	0.0265958	0.0267795	0.0303071	0.0249435	0.0309629	0.0369067
	Glycine, serine and threonine metabolism	Amino acids, peptides, and analogues	Threonine	0.00205757	0.00200029	0.00255603	0.00270111	0.00208349	0.00300709	0.00196497	0.0025067	0.00141849	0.00246667	0.00249136	0.00186483	0.00273671	0.00216478	0.00190039	0.00179404	0.00184548	0.00171263	0.00375609	0.00179695	0.00353036	0.00289036	0.00333702	0.0025306	0.00401696	0.00372278	0.00331943	0.0039017	0.00340455	0.00227972	0.00294392	0.00336327	0.00279779	0.00548776	0.00284381	0.00421456	0.00325193	0.00270897	0.00228137	0.00366846	0.00184685	0.00199849	0.00223863	0.00256842	0.00292983	0.00205405
	Glycine and Serine Metabolism, Methionine Metabolism	Amino acids, peptides, and analogues	Sarcosine	0.000108495	0.000129849	0.000261821	0.000194339	8.76106e-05	6.26126e-05	6.50293e-05	5.77501e-05	9.75652e-05	0.000128341	0.000213101	9.92435e-05	8.16484e-05	0.000197927	8.26268e-05	6.37044e-05	6.16291e-05	6.0772e-05	7.0054e-05	6.5549e-05	0.000205741	8.32966e-05	0.000132443	6.95018e-05	0.000242099	8.42075e-05	0.000180725	0.000258872	0.000152527	7.7609e-05	0.0001018	0.000158596	0.000164473	7.6126e-05	0.000108615	0.000333596	0.000147291	9.55129e-05	9.02211e-05	6.80547e-05	0.000112851	9.80664e-05	0.000474098	4.80471e-05	0.000478664	0.000196429
	Glycine, serine and threonine metabolism	Amino acids, peptides, and analogues	Serine	0.00512681	0.00616865	0.00845523	0.00724428	0.00457034	0.00692703	0.00504307	0.00794357	0.00366478	0.00559202	0.00699252	0.00568876	0.00782179	0.00667166	0.00507296	0.00427206	0.00455804	0.00532598	0.00926982	0.00416581	0.00733742	0.00730303	0.00652757	0.00651545	0.0094241	0.00909624	0.0093454	0.0092487	0.00761349	0.00588703	0.00706093	0.00959836	0.00733703	0.0122377	0.00707721	0.0079981	0.0063583	0.00671641	0.0109519	0.0168083	0.0101376	0.00994092	0.0110792	0.0156079	0.0162584	0.0126448
	Tyrosine metabolism	Amino acids, peptides, and analogues	Tyrosine	0.00106015	0.00100954	0.00245943	0.00120812	0.000755805	0.000737824	0.000858754	0.000782387	0.000957987	0.00103269	0.000838898	0.000943298	0.000858795	0.00105518	0.000587139	0.000474649	0.00070001	0.000691537	0.000629483	0.00085552	0.00111764	0.00106374	0.00109627	0.00200874	0.00155965	0.000925838	0.00108145	0.0013035	0.000953882	0.000836049	0.000624322	0.000945432	0.000914732	0.000799081	0.000951342	0.00104109	0.00101798	0.000640634	0.00131293	0.00146288	0.00094886	0.00136663	0.00121475	0.000923893	0.000826428	0.00103602
	Phenylalanine metabolism	Amino acids, peptides, and analogues	Phenylalanine	0.000668174	0.000643934	0.00139782	0.000658644	0.000677873	0.000854468	0.000732017	0.00100473	0.000701435	0.000950099	0.000760531	0.000793906	0.000849492	0.000771525	0.000580149	0.000565715	0.000649217	0.000642298	0.000891949	0.000757877	0.000979067	0.000742545	0.000674108	0.00141266	0.000744068	0.000870914	0.00081937	0.000941499	0.000874074	0.000824057	0.0006536	0.000678628	0.00075604	0.00100537	0.000736411	0.000924177	0.000837132	0.000629908	0.000853831	0.000849063	0.000705088	0.000722201	0.000855795	0.000818587	0.00106195	0.000948429
	Not Available	Amino acids, peptides, and analogues	Mimosine	0.001669	0.00175026	0.00297062	0.00313505	0.00180141	0.00126381	0.00161787	0.00154671	0.00157356	0.00192564	0.00244555	0.00140892	0.00181585	0.00259248	0.00207976	0.00197521	0.00207817	0.00188664	0.00246502	0.00182401	0.00270868	0.0019055	0.0022877	0.00209292	0.00371922	0.00212029	0.00306377	0.00267646	0.00246505	0.00203642	0.00251464	0.00232693	0.00286411	0.00300107	0.00218481	0.00185461	0.00236731	0.00251459	0.0020496	0.00249354	0.00197509	0.00205547	0.0016743	0.00260586	0.00167143	0.00184766
	Taurine and Hypotaurine Metabolism, Bile Acid Biosynthesis	Organic acids and derivatives	Hypotaurine	0.000225883	0.000225355	0.00027996	0.000224325	0.000198902	0.000218528	0.000196923	0.000183765	0.000171429	0.000236144	0.000216307	0.00019756	0.000197763	0.000171807	0.000171636	0.00019198	0.000174376	0.000157269	0.000384322	0.000193901	0.000193286	0.000280756	0.00025625	0.000433742	0.000317563	0.000288099	0.000244663	0.000254774	0.000261643	0.000208212	0.000320817	0.000279482	0.000246974	0.000362551	0.000219125	0.000361326	0.000226331	0.000225288	0.000241663	0.000463763	0.000235431	0.000363595	0.000428413	0.000300765	0.00061467	0.000308837
	Taurine and Hypotaurine Metabolism	Organic acids and derivatives	Taurine	0.0103228	0.0103929	0.0191668	0.0178011	0.0101957	0.0187209	0.0101347	0.01895	0.00966524	0.0156399	0.0203603	0.0110395	0.0171443	0.013961	0.00774457	0.0162454	0.0153406	0.0133319	0.0169282	0.0100826	0.0211525	0.0232461	0.024352	0.0292523	0.0375124	0.0366841	0.0375063	0.0363452	0.0498565	0.0290774	0.0298281	0.0311127	0.0354291	0.0389623	0.0417883	0.0207563	0.0350973	0.0237588	0.0449528	0.0440187	0.0327153	0.0274885	0.0106924	0.0405124	0.00947643	0.0372058
	Pyrimidine Metabolism, Beta-Alanine Metabolism	Pyrimidines and pyrimidine derivatives	Uracil	0.000806509	0.000700218	0.000768259	0.000885006	0.000822747	0.000584938	0.000673521	0.000804634	0.000652923	0.00124475	0.000775419	0.000812217	0.000819112	0.00107778	0.000707223	0.000711662	0.000705323	0.000715688	0.00108863	0.00093493	0.00117604	0.000438369	0.000261962	0.000297942	0.000445729	0.000343387	0.0003889	0.000433688	0.000474302	0.00053051	0.000425087	0.000317664	0.000483348	0.000542771	0.000283013	0.000463382	0.000465643	0.000316084	0.000653889	0.000505566	0.000553551	0.000552798	0.000710941	0.000654671	0.000863961	0.000625572
	Pyrimidine metabolism, Arginine biosynthesis, urea cycle	Organic acids and derivatives	Urea	0.0304834	0.0234404	0.022688	0.0273664	0.0261952	0.0243777	0.0282914	0.0235619	0.0200365	0.0273956	0.0245281	0.0221444	0.0272191	0.0171141	0.0297586	0.042935	0.0442305	0.0391989	0.0351684	0.0300355	0.0321842	0.0326594	0.036032	0.0291576	0.0306765	0.0309688	0.023792	0.0212263	0.0333092	0.0279565	0.0507672	0.0510354	0.0404146	0.0383795	0.0335787	0.0508432	0.0420624	0.0347884	0.0309832	0.0342233	0.0266173	0.0387677	0.0335613	0.0308862	0.0298779	0.0326349
	Pyrimidine metabolism	Pyrimidines and pyrimidine derivatives	Uridine	0.00261918	0.00228612	0.0024435	0.00232719	0.00212723	0.00189204	0.00213801	0.00209145	0.00196495	0.00242433	0.00243812	0.00225338	0.00256499	0.002338	0.00229706	0.00216159	0.00217263	0.0023016	0.00321264	0.00265568	0.00299941	0.00323861	0.00304342	0.00294952	0.00381724	0.0037574	0.00328004	0.00385432	0.00356535	0.00322926	0.00330858	0.00306008	0.00318872	0.00436913	0.0033385	0.003297	0.00300495	0.00321757	0.00229427	0.00168069	0.00190947	0.00194993	0.00284631	0.00165075	0.00215069	0.00239771
	Pyrimidine Metabolism,Lactose Synthesis	Pyrimidines and pyrimidine derivatives	Uridine 5'-monophosphate	0.000270307	0.000370297	0.00010502	0.000142065	0.000241578	0.000288491	0.00026818	0.000252811	0.000257513	0.000183224	0.000175106	0.000237995	0.000333652	0.000122689	0.000282884	0.000263797	0.000297657	0.000292807	0.000268333	0.000308348	0.00011215	0.000335192	0.000480811	0.000420751	0.000308687	0.000709015	0.000401326	0.000275354	0.000412377	0.000411767	0.000343387	0.000412124	0.000499109	0.000471294	0.000518066	0.000391557	0.000448232	0.000483821	0.000555698	0.000608394	0.000576735	0.00050241	0.00032572	0.000363925	0.000216748	0.000571403
	Purine metabolism, Caffeine metabolism	Purines and purine derivatives	Xanthine	0.000728772	0.000667654	0.000196221	0.000461439	0.00117648	0.00064286	0.000940762	0.00127088	0.000617494	0.00144754	0.000445052	0.00120129	0.00139347	9.93624e-05	0.000563572	0.000719731	0.000854685	0.000660839	0.00113891	0.00107389	0.000576631	0.000772899	0.000471617	0.00051068	0.000217537	0.000396773	0.000277366	0.000270317	0.000802833	0.000982605	0.000678832	0.000386276	0.000492846	0.00122683	0.000460915	0.000733822	0.000541996	0.000396452	0.00105053	0.000523793	0.000882945	0.000885217	0.000989813	0.000853438	0.00112738	0.000953413
	Purine metabolism, Caffeine metabolism	Purines and purine derivatives	Xanthosine	1.05739e-05	1.62942e-05	1.3034e-05	3.75177e-05	7.67046e-06	1.25303e-05	1.87047e-05	2.63871e-05	1.79116e-05	3.70373e-05	8.60512e-06	2.14079e-05	1.83551e-05	1.26726e-05	2.51548e-05	1.82489e-05	2.32733e-05	1.1095e-05	3.23255e-05	3.09513e-05	2.81871e-05	1.81738e-05	3.32502e-06	8.33215e-06	2.80588e-05	1.66958e-05	2.45698e-05	1.1358e-05	2.02673e-05	1.24488e-05	1.80136e-05	1.09857e-05	1.61055e-05	2.21565e-05	8.7891e-06	1.2032e-05	1.7145e-05	1.24388e-05	1.98769e-05	1.67693e-05	1.75925e-05	2.27557e-05	2.57201e-05	2.18054e-05	2.51821e-05	1.64524e-05
	Purine metabolism	Organic acids and derivatives	Oxalic acid	5.44826e-05	6.45039e-05	5.03035e-05	7.56749e-05	7.36085e-05	5.49107e-05	5.1853e-05	4.9015e-05	7.16217e-05	6.51291e-05	5.59241e-05	4.83154e-05	4.86783e-05	6.70473e-05	7.11324e-05	6.15928e-05	6.69427e-05	5.83737e-05	5.09298e-05	5.68941e-05	4.56316e-05	5.46921e-05	5.50748e-05	7.0129e-05	5.25999e-05	6.73498e-05	5.2039e-05	5.63559e-05	5.23325e-05	5.22762e-05	6.09822e-05	5.98538e-05	5.4075e-05	5.32542e-05	5.63261e-05	4.82142e-05	4.66156e-05	6.04807e-05	6.45203e-05	4.29178e-05	6.70289e-05	6.49261e-05	5.80765e-05	5.22579e-05	6.36958e-05	3.85097e-05
	Purine metabolism	Organic acids and derivatives	Hypoxanthine	0.00795101	0.00669581	0.00260187	0.00455641	0.00848302	0.00658346	0.00964059	0.0128503	0.00763832	0.0134581	0.00584649	0.0110336	0.0120993	0.00327283	0.00661205	0.00706716	0.00784708	0.00751169	0.0121507	0.0109635	0.00842363	0.00701008	0.00529626	0.0052648	0.00389857	0.0045175	0.00370714	0.00360094	0.00759338	0.00945	0.00696771	0.00489936	0.00580531	0.0137276	0.00579452	0.008385	0.00700181	0.00443786	0.00532348	0.00399268	0.00401749	0.00442082	0.0055695	0.00483265	0.00732769	0.00648431
	Purine metabolism	Purines and purine derivatives	Inosine	0.0146962	0.0125731	0.00942134	0.0136237	0.0152527	0.0126246	0.0184435	0.0212909	0.0165416	0.0195904	0.014603	0.0192476	0.018698	0.0166578	0.0123231	0.0131669	0.0134694	0.0136697	0.0185551	0.0207972	0.0207078	0.00977004	0.00652958	0.00726239	0.00624929	0.00551123	0.00634675	0.00673618	0.00961095	0.0121232	0.00759967	0.00584571	0.00799871	0.0159495	0.00720882	0.0114487	0.0101828	0.00559131	0.007468	0.00546667	0.00539675	0.00607651	0.00860455	0.00689484	0.0110026	0.00790027
	Purine metabolism	Purines and purine derivatives	Guanosine	0.00129927	0.000829514	0.000407383	0.000936332	0.00130027	0.000916553	0.00134237	0.00159231	0.000947565	0.00150443	0.000811369	0.00141524	0.00156486	0.000935142	0.000964519	0.0011515	0.00111269	0.00101669	0.00127428	0.00137554	0.00119118	0.00102181	0.000822462	0.000732356	0.00055821	0.000830095	0.000510977	0.000544907	0.00103306	0.00118503	0.000955402	0.000613249	0.000745555	0.0011793	0.000880025	0.000937913	0.000634632	0.000865053	0.000833735	0.000455258	0.000798142	0.000677593	0.000822276	0.000625609	0.000887731	0.00062859
	Purine metabolism	Purines and purine derivatives	adenine	0.00111725	0.00106532	0.00121323	0.00118889	0.00106633	0.000901716	0.000995062	0.000833582	0.000851651	0.00116034	0.00104205	0.00112063	0.00119164	0.00104842	0.000969486	0.00106012	0.00103124	0.00106814	0.000935861	0.0011327	0.00122114	0.00115073	0.00117253	0.00108701	0.00129203	0.00110441	0.00114644	0.00141782	0.00137122	0.0011797	0.00116386	0.00124414	0.00126992	0.00107327	0.00142171	0.00123815	0.00139012	0.00106599	0.000957708	0.000708187	0.000881809	0.000855011	0.00112224	0.000739543	0.000732012	0.00109509
	Purine metabolism	Purines and purine derivatives	adenosine	0.00611785	0.00533143	0.00327197	0.00621127	0.011314	0.00438767	0.0027946	0.0015916	0.00359215	0.00436013	0.00461874	0.00721155	0.00828264	0.00162737	0.00621131	0.00533999	0.0106648	0.00876402	0.00071363	0.000834959	0.000665715	0.0101089	0.0118	0.010821	0.00650253	0.0117806	0.00608145	0.00705301	0.0106906	0.011159	0.014307	0.010054	0.00883922	0.00452766	0.0108991	0.00858562	0.00509244	0.0129204	0.0137139	0.00958596	0.0171946	0.0118439	0.0134224	0.011587	0.00824639	0.01229
	Purine metabolism, urea cycle	Purines and purine derivatives	adenosine-5-monophosphate	0.00762907	0.0096684	0.00351	0.00275788	0.00311222	0.00883077	0.00431328	0.00241775	0.00488674	0.00218945	0.00290105	0.00307324	0.00310843	0.00168714	0.00724222	0.0104394	0.00657825	0.00739655	0.00478775	0.00524256	0.000646741	0.00968293	0.0122564	0.0109402	0.00582027	0.0131311	0.00739836	0.00601351	0.00795226	0.00680472	0.00946734	0.0116983	0.00828115	0.00540144	0.0106204	0.00946065	0.00960558	0.0107172	0.0116222	0.0115459	0.0103232	0.0114336	0.00959515	0.00760944	0.00759113	0.0096835
	Propanoate Metabolism	Organic acids and derivatives	2-Hydroxybutyric acid	0.000471929	0.000493681	0.000297052	0.00034081	0.000637066	0.000259091	0.00057519	0.000404033	0.000561665	0.000717766	0.000678054	0.000664342	0.000690396	0.000326225	0.000825257	0.000762119	0.00130625	0.0012252	0.00103055	0.00122961	0.00135433	0.000406692	0.000252143	0.000286787	0.00035597	0.000244103	0.000351245	0.00044885	0.000504811	0.000610883	0.000772945	0.00135342	0.00128183	0.00105933	0.00110169	0.00166982	0.00157273	0.000640162	0.000319541	0.000210988	0.000326507	0.000510379	0.000340792	0.000267944	0.000323743	0.000876273
	Not Available	Organic acids and derivatives	Aminomalonic acid	6.74312e-05	4.19372e-05	4.76294e-05	7.51065e-05	4.83936e-05	7.11747e-05	7.0514e-05	4.88697e-05	5.46217e-05	5.31028e-05	6.30551e-05	5.64487e-05	7.13105e-05	8.62204e-05	4.77393e-05	3.99208e-05	2.93759e-05	4.44424e-05	5.09855e-05	5.30279e-05	5.49774e-05	5.98328e-05	8.25452e-05	6.28047e-05	8.92277e-05	8.92264e-05	8.97128e-05	8.91274e-05	9.52307e-05	9.63692e-05	7.49715e-05	8.97485e-05	7.97015e-05	8.74635e-05	6.71005e-05	9.7679e-05	6.2202e-05	8.55569e-05	6.90324e-05	8.16519e-05	5.91191e-05	9.58089e-05	0.000136962	9.78613e-05	0.000127574	0.000111528
	Not Available	Organic acids and derivatives	Decanedioic acid	0.00307415	0.00228354	0.00327868	0.00394061	0.00331029	0.00211139	0.00225592	0.00170368	0.00230697	0.00250156	0.00375019	0.00228985	0.00219814	0.00376465	0.00287031	0.00210782	0.00222452	0.00220798	0.00304712	0.00284435	0.00394146	0.00319996	0.00245105	0.00259034	0.00460239	0.00383694	0.00390442	0.00369533	0.00284095	0.00256391	0.00316841	0.00234965	0.00304591	0.00380743	0.00275164	0.00272499	0.00261353	0.00349378	0.00223945	0.0028609	0.00258806	0.00246168	0.00203579	0.00268782	0.00196504	0.00188215
	Not Available	Organic acids and derivatives	dihydroxyacetone phosphate	8.85567e-05	0.000195434	9.00601e-05	0.000187968	0.000220519	0.000214287	0.000236474	0.000424718	0.000290848	0.000317476	0.000189423	0.000260288	0.000311883	0.000241342	0.000201527	0.000157505	0.000282018	0.000262338	0.000124604	0.000247237	0.000247481	7.57029e-05	0.000106825	8.17089e-05	0.000100537	7.20854e-05	4.82547e-05	6.50046e-05	0.000144885	0.000141703	0.000143811	0.000121078	0.000137837	6.65588e-05	6.88851e-05	0.000166097	0.000173829	6.16725e-05	1.52058e-05	1.8484e-05	1.75925e-05	1.60509e-05	2.32831e-05	1.3572e-05	3.86277e-05	4.51321e-05
	Not Available	Organic acids and derivatives	methylphosphate	0.0137074	0.0125077	0.00720458	0.0107105	0.0169975	0.0131989	0.0154223	0.0133154	0.0140482	0.0176035	0.0110703	0.0160055	0.0175289	0.0128939	0.0195675	0.0182347	0.0194187	0.01647	0.0135985	0.0141909	0.00714851	0.0226495	0.0179465	0.02355	0.0126299	0.0188679	0.0169667	0.0158703	0.0192776	0.022796	0.027337	0.0177605	0.0225836	0.0169364	0.0182922	0.0156388	0.0184375	0.0232462	0.0132271	0.0140079	0.0137918	0.0125192	0.00884857	0.0170093	0.0117948	0.00931996
	Not Available	Organic acids and derivatives	Iminodiacetic acid	0.000372821	0.00014261	0.000206319	0.000307224	0.000238398	0.000364553	0.000409339	0.000232671	0.000233171	0.000266313	0.000301769	0.000201606	0.000360273	0.000308577	0.000282624	0.000190291	0.000192011	0.000188051	0.000277561	0.000244425	0.00039447	0.000258763	0.000305812	0.00019659	0.000234327	0.00039647	0.000342377	0.000274555	0.000179904	0.000239204	0.000258621	0.000229265	0.00024757	0.000274712	0.000192758	0.000331677	0.000206786	0.000311714	0.000299604	0.000301008	0.000311438	0.00049207	0.000395194	0.000349846	0.00061638	0.000345673
		unknown	unknown-1	0.000744185	0.000775969	0.000509823	0.000655707	0.000854461	0.000733465	0.000651801	0.000662184	0.000741446	0.000708045	0.00059005	0.00061158	0.000625779	0.000673852	0.000883336	0.000774255	0.000878608	0.000718628	0.000506067	0.000799219	0.000450346	0.000866306	0.000614615	0.000748057	0.000614941	0.000712678	0.000653237	0.000551089	0.000638863	0.000818507	0.000743348	0.000743729	0.000755397	0.00054345	0.000657063	0.000699602	0.000638775	0.000859541	0.000700401	0.000668116	0.000841146	0.000684411	0.00057771	0.000508837	0.000683038	0.000562952
		unknown	unknown-2	0.000108674	0.000127374	0.00019364	0.000179204	0.000144707	0.000107808	0.000112031	0.000106275	0.000133881	0.000157391	0.00022471	0.000107103	9.97349e-05	0.000301842	0.000152633	0.000133988	0.000134582	0.000137248	0.000172563	0.000176767	0.000181961	0.000137029	0.000141681	0.00013	0.000182505	0.000118692	0.000158132	0.000155903	0.000163872	0.000130277	0.000164784	0.000162622	0.000168924	0.000171154	0.000144552	0.000172415	0.000133058	0.000138515	9.00422e-05	0.000130382	0.00011517	0.000118407	0.000122621	0.000122938	0.000172856	0.000174458
		unknown	unknown-3	0.00914347	0.000377314	0.00845319	0.00972069	0.00041016	0.000287299	0.000320558	0.000283157	0.00983233	0.000407068	0.00767925	0.00825675	0.000282749	0.0101701	0.000441726	0.000329925	0.000351583	0.000324611	0.00765317	0.000335961	0.00743228	0.000315546	0.000322549	0.000335481	0.00829155	0.000304673	0.00792419	0.00740521	0.000336823	0.000334028	0.000328163	0.000351328	0.000412617	0.0075626	0.000364948	0.000319775	0.000360538	0.000392281	0.000303619	0.00716853	0.000347464	0.000353301	0.00787738	0.00786902	0.00922703	0.000311234
		unknown	unknown-4	5.49531e-05	6.09711e-05	0.000151359	0.000183823	7.1656e-05	6.91026e-05	6.01346e-05	6.47601e-05	6.66203e-05	6.13637e-05	0.000135158	5.58587e-05	5.7923e-05	0.000156459	6.24683e-05	7.41958e-05	7.12818e-05	5.76229e-05	0.000168683	6.10678e-05	0.000129894	5.80623e-05	6.81963e-05	6.67244e-05	0.0001442	7.15997e-05	0.000119686	0.00012374	4.98902e-05	6.59873e-05	6.68164e-05	5.68986e-05	6.49266e-05	0.000131186	6.54052e-05	6.5529e-05	5.58854e-05	6.85746e-05	6.60111e-05	0.000124981	5.70735e-05	5.75892e-05	5.72892e-05	0.000139536	8.41833e-05	5.29099e-05
		unknown	unknown-5	0.00155249	0.00145098	0.00118698	0.00108133	0.00128755	0.00143002	0.00149729	0.00129311	0.00130117	0.00163699	0.00136799	0.00131448	0.00148628	0.00127587	0.00145687	0.00146596	0.00159885	0.00150157	0.00144304	0.00178586	0.00171044	0.000806687	0.000677299	0.000717013	0.000578088	0.000676048	0.000608371	0.000725158	0.000827354	0.000790933	0.000861565	0.000876542	0.000798139	0.000790891	0.000740783	0.000951734	0.00112025	0.000624545	0.000940176	0.00123781	0.00116761	0.000965178	0.00112501	0.00101929	0.00118025	0.00118861
		unknown	unknown-6	0.0262287	0.0217031	0.0207914	0.0193583	0.0215648	0.0239782	0.0242217	0.0221412	0.0256838	0.0176264	0.0191162	0.0238107	0.0241823	0.0208519	0.0224793	0.0196913	0.0195194	0.0213095	0.0186228	0.0229173	0.0200308	0.0257746	0.0233286	0.0218582	0.0191306	0.0209472	0.0234077	0.0262645	0.0168362	0.0228448	0.0187699	0.0192382	0.0205551	0.0164609	0.0223063	0.0208491	0.0222771	0.0214035	0.0225491	0.0221506	0.022696	0.0232776	0.0224435	0.023043	0.0198761	0.0217109
		unknown	unknown-7	0.000120099	0.000171257	0.000181205	0.00021035	0.000634416	0.000107788	0.000136483	0.000172342	0.000152187	0.00019687	0.000162447	0.000145304	0.000276458	0.000287667	0.000115175	0.000128876	0.000193357	0.00035969	0.000135745	0.000350964	0.000217465	0.000163714	0.000269817	0.000147336	0.000214551	0.000126989	0.000169146	0.000173791	0.000151108	0.000638958	0.000279211	0.000205259	0.000133891	0.000147871	0.000123962	0.000143392	0.000127911	0.000159767	0.000215545	0.000122718	0.000222725	0.000177125	0.000360813	0.000132261	0.000470073	0.000248666
		unknown	unknown-8	0.000173843	0.000204591	0.000392779	0.000488843	0.000227297	0.00015402	0.000172319	0.000151749	0.00019959	0.000187765	0.000367717	0.000161571	0.000163393	0.000465576	0.000219693	0.000183667	0.000200178	0.000168239	0.000394479	0.000179513	0.000370923	0.000172182	0.000169464	0.000179231	0.000416239	0.000165865	0.000395602	0.000372279	0.000166176	0.00018869	0.000179284	0.000174101	0.000181749	0.000385029	0.000166279	0.000158055	0.000165749	0.000210094	0.000165674	0.000383912	0.000190472	0.000182497	0.000136999	0.000435338	0.000171033	0.000140104
		unknown	unknown-9	0.00105188	0.00110839	0.00178931	0.0015752	0.000987425	0.000813417	0.000920527	0.000654411	0.00100874	0.00120023	0.00139397	0.000791104	0.000668531	0.00506551	0.00125254	0.000826179	0.000892206	0.000763863	0.000851547	0.000883703	0.0012558	0.00074359	0.000787985	0.000705411	0.00164397	0.000782699	0.00148891	0.00166567	0.000849729	0.000716523	0.000782037	0.000806623	0.00135628	0.000778874	0.00101449	0.000739191	0.000704402	0.000778106	0.000703025	0.000670671	0.000857261	0.000695947	0.000655226	0.000833362	0.000689328	0.000503713
		unknown	unknown-10	9.86601e-05	0.00012747	0.000228815	0.000199739	0.000131597	7.7782e-05	0.000103837	7.75995e-05	0.000103651	0.000156638	0.000189976	9.59354e-05	7.76398e-05	0.000546869	0.000117601	9.45563e-05	0.000106412	9.69558e-05	4.18876e-05	0.000107923	0.00017358	9.97213e-05	0.000112805	0.000100859	0.000242467	9.51964e-05	0.000201962	0.000261686	0.000192805	0.000101614	0.000107102	0.000144934	0.000200447	5.47385e-05	0.000129293	9.83043e-05	0.000168189	0.000134542	0.00011779	5.40803e-05	0.000153514	0.000109264	0.00012712	8.00974e-05	0.000111143	0.000140777
		unknown	unknown-11	0.00214781	0.000870851	0.00293943	0.00542574	0.00186847	0.00133525	0.00200225	0.000813859	0.00146323	0.00131721	0.00406368	0.00114958	0.00179272	0.00394373	0.00222356	0.00109507	0.00136006	0.00113644	0.00264252	0.00149416	0.00353224	0.00143334	0.00137917	0.00148588	0.00408733	0.00164989	0.00379623	0.00218619	0.000678826	0.00163819	0.00131269	0.00143458	0.00187351	0.00237308	0.000811631	0.00170399	0.000906574	0.00174788	0.000980963	0.00229172	0.00139206	0.00265949	0.00143081	0.00251911	0.00249444	0.00107418
		unknown	unknown-12	0.000189255	0.000213435	0.000214192	0.000241828	0.000258815	0.000194856	0.000193733	0.000189068	0.000190425	0.000200385	0.000213543	0.000171011	0.000234166	0.000268072	0.000277512	0.000182889	0.000235634	0.000217895	0.000208398	0.000211782	0.000209233	0.000369236	0.00034212	0.000352728	0.000446875	0.000328897	0.000333528	0.000258785	0.000352284	0.000317096	0.000325522	0.0003615	0.000292537	0.000310906	0.000327227	0.000323656	0.000245609	0.000391138	0.000309861	0.000292177	0.000275548	0.00027194	0.000299812	0.000280895	0.000267181	0.000350571
		unknown	unknown-13	0.000523925	0.00235422	0.000470646	0.00057359	0.00259959	0.00184786	0.00214212	0.00172206	0.000635085	0.0024616	0.000454745	0.000466381	0.00182024	0.000550764	0.00270612	0.00214061	0.00222558	0.00200477	0.000461265	0.0021049	0.000437907	0.00200388	0.00205075	0.00209885	0.000452703	0.00192273	0.000458128	0.000418631	0.00206206	0.00211285	0.00207235	0.00214775	0.00236021	0.000455504	0.00211052	0.00203994	0.00201879	0.00237377	0.00181951	0.000420965	0.00219502	0.00211974	0.000449671	0.000392498	0.000518226	0.00184917
		unknown	unknown-14	0.00416969	0.00514786	0.0055265	0.00266724	0.00770831	0.00217344	0.00701849	0.00652046	0.00383217	0.00559446	0.00405966	0.00953115	0.0104121	0.00260086	0.00839669	0.00310064	0.00328337	0.00421179	0.00381177	0.00592085	0.00611761	0.00648415	0.00475462	0.00422736	0.00473011	0.00233602	0.00384569	0.00654199	0.00613435	0.00706029	0.00495376	0.0037243	0.00611575	0.00524888	0.00557713	0.00632869	0.00936612	0.00495525	0.00615939	0.00384484	0.00650712	0.00427668	0.00245554	0.00444868	0.0012676	0.00511639
		unknown	unknown-15	0.000781351	0.00102115	0.00134452	0.00193856	0.00148921	0.000573425	0.000949786	0.000875569	0.0011098	0.00171145	0.00106497	0.000811395	0.00118148	0.00159886	0.00159154	0.00180279	0.0018139	0.00148433	0.000859401	0.00112584	0.00107859	0.00080097	0.000825966	0.00135261	0.00147971	0.000792939	0.00116962	0.000963416	0.00172849	0.00107125	0.00131203	0.000969567	0.0023138	0.000926834	0.00118793	0.000500966	0.00138801	0.00142415	0.00129824	0.000842616	0.00107599	0.000864493	0.000336836	0.000998896	0.000179761	0.000685828
		unknown	unknown-16	0.00132781	0.001015	0.000987164	0.0015212	0.00119386	0.00117398	0.00131392	0.00117883	0.0010861	0.000964088	0.000939617	0.00112577	0.00122008	0.00104647	0.00091392	0.000849695	0.000904597	0.000839171	0.000992695	0.00102855	0.000969604	0.00143016	0.00107516	0.000944266	0.00144202	0.00123895	0.00122779	0.0012057	0.000895168	0.00108226	0.000825687	0.000873908	0.00091558	0.0011026	0.00102926	0.000884221	0.00103918	0.0011038	0.00110219	0.0010242	0.000948679	0.00160342	0.00123775	0.00130229	0.000871755	0.000978419
		unknown	unknown-17	1.43375e-05	1.12954e-05	1.55585e-05	2.35196e-05	1.55641e-05	1.11424e-05	1.07727e-05	1.11142e-05	1.65319e-05	1.17296e-05	2.02875e-05	9.20795e-06	1.30423e-05	7.02624e-05	1.51911e-05	1.52704e-05	1.71011e-05	1.19917e-05	7.0741e-06	5.64547e-06	1.33702e-05	1.0964e-05	1.39026e-05	6.78667e-06	1.67289e-05	1.31138e-05	2.08796e-05	1.89647e-05	1.59341e-05	1.12735e-05	1.31163e-05	1.69818e-05	1.81932e-05	6.81325e-06	1.7712e-05	1.1191e-05	1.6981e-05	1.80747e-05	8.42779e-06	1.03565e-05	1.79335e-05	1.58252e-05	1.37599e-05	9.75605e-06	1.07337e-05	1.15891e-05
		unknown	unknown-18	5.79774e-05	8.46193e-05	0.000100626	0.000132567	0.00011012	0.000132341	0.00012252	0.000177918	0.000164038	0.000153056	0.000145274	0.000117596	0.000141777	0.00016648	0.000153124	0.000153571	0.000189319	0.00014559	9.31887e-05	8.38693e-05	9.52709e-05	0.000278345	0.0001912	0.000265352	0.000121336	0.00019272	0.000262379	0.000163093	0.000207124	0.000111038	0.000171087	0.000331134	0.000201754	7.59114e-05	0.000201725	0.000108784	0.000172968	0.000297264	0.000346374	0.0002769	0.000258047	0.000295938	0.00031091	0.00024471	0.00021554	0.000260497
[truncated: 106 more columns]
