# Supplementary material for: A metabolome atlas of mouse brain on the global metabolic signature dynamics following short-term fasting
Source: Signal Transduct Target Ther. 2023 Sep 8;8:334. doi: 10.1038/s41392-023-01552-y (PMC10484938; doi:10.1038/s41392-023-01552-y)
Supplement: Supplementary file 3 — Dataset 2 [file 41392_2023_1552_MOESM3_ESM.xlsx]

## Sheet: Qualitative information
Supplementary Table 4. Detalied qualitative information of the identified Lipids.
BMP: Bismonoacylglycerophosphate	FA: Fatty acid		NAE: N-acylethanolamine	SM: Sphingomyelin
CAR: Acylcarnitine	HexCer: Hexosyl ceramide		PC: Phosphatidylcholine	ST: Sterol Lipids
CE: Cholesteryl ester	LPC: Lysophosphatidylcholine		PE: Phosphatidylethanolamine	TG: Triacylglycerol
Cer: Ceramide	LPE: Lysophosphatidylethanolamine		PG: Phosphatidylglycerol
CL: Cardiolipin	LPG: Lysophosphatidylglycerol		PI: Phosphatidylinositol
DG: Diacylglycerol	MG: Monoacylglycerol		PS: Phosphatidylserine
	m/z	Rt/min	Adduct type	Total score	Formula	m/z matched	MS/MS matched
BMP 42:10|BMP 20:4_22:6	860.546	1.389	[M+NH4]+	100	C48H75O10P	TRUE	TRUE
BMP 44:12|BMP 22:6_22:6	884.542	1.311	[M+NH4]+	100	C50H75O10P	TRUE	TRUE
CAR 14:0	372.311	1.044	[M+H]+	100	C21H41NO4	TRUE	TRUE
CAR 16:0	400.343	1.127	[M+H]+	100	C23H45NO4	TRUE	TRUE
CAR 16:1	398.325	1.069	[M+H]+	100	C23H43NO4	TRUE	TRUE
CAR 18:1	426.358	1.149	[M+H]+	100	C25H47NO4	TRUE	TRUE
CAR 18:2	424.341	1.084	[M+H]+	100	C25H45NO4	TRUE	TRUE
CAR 20:1	454.39	1.264	[M+H]+	100	C27H51NO4	TRUE	TRUE
CAR 20:4	448.341	1.081	[M+H]+	100	C27H45NO4	TRUE	TRUE
CE 16:0	642.618	7.266	[M+NH4]+	97.5	C43H76O2	TRUE	TRUE
CE 18:1	668.632	7.302	[M+NH4]+	100	C45H78O2	TRUE	TRUE
CE 18:2	666.616	6.95	[M+NH4]+	100	C45H76O2	TRUE	TRUE
CE 18:3	664.597	6.598	[M+NH4]+	100	C45H74O2	TRUE	TRUE
CE 20:3	692.628	6.989	[M+NH4]+	100	C47H78O2	TRUE	TRUE
CE 20:4	690.613	6.68	[M+NH4]+	100	C47H76O2	TRUE	TRUE
CE 20:5	688.597	6.331	[M+NH4]+	100	C47H74O2	TRUE	TRUE
CE 22:4	718.644	7.046	[M+NH4]+	100	C49H80O2	TRUE	TRUE
CE 22:5	716.629	6.719	[M+NH4]+	100	C49H78O2	TRUE	TRUE
CE 22:6	714.614	6.449	[M+NH4]+	100	C49H76O2	TRUE	TRUE
CE 24:4	746.681	7.427	[M+NH4]+	100	C51H84O2	TRUE	TRUE
CE 24:5	744.663	7.117	[M+NH4]+	100	C51H82O2	TRUE	TRUE
CE 24:6	742.651	6.796	[M+NH4]+	100	C51H80O2	TRUE	TRUE
Cer 30:1;2O|Cer 18:1;2O/12:0	464.44296,482.45462	2.19	[M+H-H2O]+,[M+H]+	100	C30H59NO3	TRUE	TRUE
Cer 36:0;2O|Cer 18:0;2O/18:0	568.563	3.816	[M+H]+	100	C36H73NO3	TRUE	TRUE
Cer 36:1;2O|Cer 18:1;2O/18:0	548.53705,566.54938	3.674	[M+H-H2O]+,[M+H]+	100	C36H71NO3	TRUE	TRUE
Cer 36:2;2O|Cer 18:2;2O/18:0	564.53333,546.52179	3.194	[M+H-H2O]+,[M+H]+	100	C36H69NO3	TRUE	TRUE
Cer 37:1;2O|Cer 18:1;2O/19:0	562.55194,580.56433	3.952	[M+H-H2O]+,[M+H]+	100	C37H73NO3	TRUE	TRUE
Cer 37:3;3O|Cer 18:1;2O/19:2;O	574.513	3.375	[M+H-H2O]+	100	C37H69NO4	TRUE	TRUE
Cer 38:1;2O|Cer 18:1;2O/20:0	576.57068,594.58002	4.232	[M+H-H2O]+,[M+H]+	100	C38H75NO3	TRUE	TRUE
Cer 38:2;2O|Cer 18:2;2O/20:0	574.552	3.771	[M+H-H2O]+	100	C38H73NO3	TRUE	TRUE
Cer 38:7;4O	596.468	1.784	[M+H-H2O]+	80.9	C38H63NO5	TRUE	TRUE
Cer 39:1;2O|Cer 18:1;2O/21:0	590.58801,608.59784	4.55	[M+H-H2O]+,[M+H]+	100	C39H77NO3	TRUE	TRUE
Cer 40:1;2O|Cer 18:1;2O/22:0	604.599	4.818	[M+H-H2O]+	100	C40H79NO3	TRUE	TRUE
Cer 40:2;2O|Cer 18:2;2O/22:0	602.584	4.368	[M+H-H2O]+	100	C40H77NO3	TRUE	TRUE
Cer 40:3;2O|Cer 18:1;2O/22:2	600.57	3.744	[M+H-H2O]+	100	C40H75NO3	TRUE	TRUE
Cer 40:7;4O|Cer 20:2;3O/20:5;(2OH)	624.498	2.075	[M+H-H2O]+	100	C40H67NO5	TRUE	TRUE
Cer 41:0;4O|Cer 17:0;3O/24:0;(2OH)	652.631	4.247	[M+H-H2O]+	100	C41H83NO5	TRUE	TRUE
Cer 41:1;2O|Cer 18:1;2O/23:0	618.61597,636.62372	5.098	[M+H-H2O]+,[M+H]+	100	C41H81NO3	TRUE	TRUE
Cer 41:2;2O|Cer 17:1;2O/24:1	616.602	4.569	[M+H-H2O]+	100	C41H79NO3	TRUE	TRUE
Cer 42:1;2O|Cer 18:1;2O/24:0	632.63043,650.64081	5.36	[M+H-H2O]+,[M+H]+	100	C42H83NO3	TRUE	TRUE
Cer 42:2;2O|Cer 18:1;2O/24:1	630.616	4.803	[M+H-H2O]+	100	C42H81NO3	TRUE	TRUE
Cer 42:3;2O|Cer 18:2;2O/24:1	628.598	4.344	[M+H-H2O]+	100	C42H79NO3	TRUE	TRUE
Cer 43:1;2O|Cer 18:1;2O/25:0	664.656	5.599	[M+H]+	100	C43H85NO3	TRUE	TRUE
Cer 43:1;3O|Cer 18:1;2O/25:0;O	662.642	5.065	[M+H-H2O]+	100	C43H85NO4	TRUE	TRUE
Cer 43:2;3O|Cer 18:1;2O/25:1;O	660.626	4.433	[M+H-H2O]+	100	C43H83NO4	TRUE	TRUE
Cer 44:1;3O|Cer 20:1;2O/24:0;O	694.68	5.104	[M+H]+	100	C44H87NO4	TRUE	TRUE
Cer 45:1;3O|Cer 20:1;2O/25:0;O	708.694	5.361	[M+H]+	100	C45H89NO4	TRUE	TRUE
Cer 45:2;3O|Cer 18:1;2O/27:1;O	706.678	4.801	[M+H]+	96.1	C45H87NO4	TRUE	TRUE
CL 68:4|CL 16:1_18:1_16:1_18:1	1399.96	5.952	[M-H]-	100	C77H142O17P2	TRUE	TRUE
CL 72:4|CL 18:1_18:1_18:1_18:1	727.504	6.544	[M-2H]2-	100	C81H150O17P2	TRUE	TRUE
CL 72:5|CL 18:1_18:1_18:1_18:2	726.5	6.303	[M-2H]2-	100	C81H148O17P2	TRUE	TRUE
CL 72:7|CL 18:1_18:2_18:2_18:2	724.481	5.77	[M-2H]2-	100	C81H144O17P2	TRUE	TRUE
CL 74:11|CL 36:5_38:6	1469.94	5.489	[M-H]-	100	C83H140O17P2	TRUE	TRUE
CL 74:9|CL 18:1_18:2_18:2_20:4	736.482	5.801	[M-2H]2-	100	C83H144O17P2	TRUE	TRUE
CL 76:9|CL 18:1_18:1_18:1_22:6	750.496	6.132	[M-2H]2-	100	C85H148O17P2	TRUE	TRUE
CL 78:12|CL 18:1_18:1_20:4_22:6	761.487	5.84	[M-2H]2-	100	C87H146O17P2	TRUE	TRUE
CL 78:13|CL 18:1_18:2_20:4_22:6	760.481	5.595	[M-2H]2-	100	C87H144O17P2	TRUE	TRUE
CL 78:14|CL 16:1_18:1_22:6_22:6	759.471	5.365	[M-2H]2-	100	C87H142O17P2	TRUE	TRUE
CL 80:14|CL 18:1_18:1_22:6_22:6	773.488	5.686	[M-2H]2-	100	C89H146O17P2	TRUE	TRUE
CL 80:15|CL 18:1_20:4_20:4_22:6	772.484	5.507	[M-2H]2-	100	C89H144O17P2	TRUE	TRUE
CL 82:17|CL 18:1_20:4_22:6_22:6	784.48	5.37	[M-2H]2-	100	C91H144O17P2	TRUE	TRUE
CL 84:19|CL 18:1_22:6_22:6_22:6	796.483	5.206	[M-2H]2-	100	C93H144O17P2	TRUE	TRUE
DG 27:5	511.348	1.219	[M+Na]+	96.7	C30H48O5	TRUE	TRUE
DG 30:0|DG 14:0_16:0	558.509	3.426	[M+NH4]+	100	C33H64O5	TRUE	TRUE
DG 30:1|DG 14:0_16:1	556.487	2.958	[M+NH4]+	100	C33H62O5	TRUE	TRUE
DG 30:8	547.342	0.956	[M+Na]+	100	C33H48O5	TRUE	TRUE
DG 32:0|DG 16:0_16:0	586.538	3.988	[M+NH4]+	100	C35H68O5	TRUE	TRUE
DG 32:1|DG 16:0_16:1	584.521	3.517	[M+NH4]+	100	C35H66O5	TRUE	TRUE
DG 32:2|DG 14:0_18:2	582.508	3.049	[M+NH4]+	100	C35H64O5	TRUE	TRUE
DG 33:1|DG 15:0_18:1	598.535	3.8	[M+NH4]+	100	C36H68O5	TRUE	TRUE
DG 33:2|DG 15:0_18:2	596.52	3.348	[M+NH4]+	100	C36H66O5	TRUE	TRUE
DG 34:0|DG 16:0_18:0	614.569	4.551	[M+NH4]+	100	C37H72O5	TRUE	TRUE
DG 34:1|DG 16:0_18:1	612.553	4.072	[M+NH4]+	100	C37H70O5	TRUE	TRUE
DG 34:2|DG 16:0_18:2	610.538	3.636	[M+NH4]+	100	C37H68O5	TRUE	TRUE
DG 34:3|DG 16:1_18:2	608.523	3.192	[M+NH4]+	100	C37H66O5	TRUE	TRUE
DG 34:4|DG 16:2_18:2	606.508	2.785	[M+NH4]+	100	C37H64O5	TRUE	TRUE
DG 35:1|DG 17:0_18:1	626.568	4.359	[M+NH4]+	100	C38H72O5	TRUE	TRUE
DG 35:2|DG 17:0_18:2	624.554	3.904	[M+NH4]+	100	C38H70O5	TRUE	TRUE
DG 35:3|DG 17:1_18:2	622.536	3.442	[M+NH4]+	100	C38H68O5	TRUE	TRUE
DG 36:0|DG 16:0_20:0	642.598	5.08	[M+NH4]+	100	C39H76O5	TRUE	TRUE
DG 36:1|DG 18:0_18:1	640.586	4.636	[M+NH4]+	100	C39H74O5	TRUE	TRUE
DG 36:2|DG 18:1_18:1	638.57	4.155	[M+NH4]+	100	C39H72O5	TRUE	TRUE
DG 36:3|DG 18:1_18:2	636.556	3.742	[M+NH4]+	100	C39H70O5	TRUE	TRUE
DG 36:4|DG 16:0_20:4	634.538	3.524	[M+NH4]+	100	C39H68O5	TRUE	TRUE
DG 36:5|DG 18:2_18:3	632.524	2.809	[M+NH4]+	100	C39H66O5	TRUE	TRUE
DG 37:3|DG 19:1_18:2	650.568	4.003	[M+NH4]+	100	C40H72O5	TRUE	TRUE
DG 37:4|DG 17:0_20:4	648.555	3.821	[M+NH4]+	100	C40H70O5	TRUE	TRUE
DG 38:1|DG 18:0_20:1	668.619	5.12	[M+NH4]+	100	C41H78O5	TRUE	TRUE
DG 38:2|DG 18:1_20:1	666.601	4.665	[M+NH4]+	100	C41H76O5	TRUE	TRUE
DG 38:3|DG 20:1_18:2	664.584	4.248	[M+NH4]+	100	C41H74O5	TRUE	TRUE
DG 38:4|DG 18:1_20:3	662.568	3.821	[M+NH4]+	100	C41H72O5	TRUE	TRUE
DG 38:5|DG 18:1_20:4	660.55	3.626	[M+NH4]+	100	C41H70O5	TRUE	TRUE
DG 38:6|DG 16:0_22:6	658.538	3.305	[M+NH4]+	100	C41H68O5	TRUE	TRUE
DG 38:7|DG 16:1_22:6	656.523	2.837	[M+NH4]+	100	C41H66O5	TRUE	TRUE
DG 40:1|DG 22:0_18:1	696.647	5.671	[M+NH4]+	100	C43H82O5	TRUE	TRUE
DG 40:2|DG 18:1_22:1	694.63	5.168	[M+NH4]+	100	C43H80O5	TRUE	TRUE
DG 40:4|DG 18:0_22:4	690.601	4.489	[M+NH4]+	100	C43H76O5	TRUE	TRUE
DG 40:4|DG 20:0_20:4	690.604	4.678	[M+NH4]+	100	C43H76O5	TRUE	TRUE
DG 40:5|DG 18:1_22:4	688.586	4.005	[M+NH4]+	100	C43H74O5	TRUE	TRUE
DG 40:6|DG 18:0_22:6	686.568	3.903	[M+NH4]+	100	C43H72O5	TRUE	TRUE
DG 40:7|DG 18:1_22:6	684.554	3.396	[M+NH4]+	100	C43H70O5	TRUE	TRUE
DG 40:8|DG 18:2_22:6	682.54	2.931	[M+NH4]+	100	C43H68O5	TRUE	TRUE
DG 41:1|DG 23:0_18:1	710.663	5.917	[M+NH4]+	100	C44H84O5	TRUE	TRUE
DG 42:1|DG 24:0_18:1	724.678	6.145	[M+NH4]+	100	C45H86O5	TRUE	TRUE
DG 42:2|DG 18:1_24:1	722.66	5.661	[M+NH4]+	100	C45H84O5	TRUE	TRUE
DG 42:6|DG 18:1_24:5	714.601	4.049	[M+NH4]+	100	C45H76O5	TRUE	TRUE
DG 44:2|DG 18:1_26:1	750.696	6.114	[M+NH4]+	100	C47H88O5	TRUE	TRUE
DG 48:6	803.655	6.751	[M+Na]+	100	C51H88O5	TRUE	TRUE
DG 49:8	813.628	6.304	[M+Na]+	100	C52H86O5	TRUE	TRUE
DG 50:0	843.777	8.055	[M+Na]+	100	C53H104O5	TRUE	TRUE
DG 51:6	845.695	7.273	[M+Na]+	100	C54H94O5	TRUE	TRUE
DG 52:0	871.802	8.352	[M+Na]+	100	C55H108O5	TRUE	TRUE
DG 52:1	869.787	8.072	[M+Na]+	100	C55H106O5	TRUE	TRUE
DG 52:2	867.776	7.802	[M+Na]+	100	C55H104O5	TRUE	TRUE
DG O-40:7|DG O-18:1_22:6	670.578	4.356	[M+NH4]+	100	C43H72O4	TRUE	TRUE
FA 9:0	157.123	0.968	[M-H]-	100	C9H18O2	TRUE	TRUE
FA 12:0	199.171	1.061	[M-H]-	100	C12H24O2	TRUE	TRUE
FA 13:0	213.187	1.111	[M-H]-	99.8	C13H26O2	TRUE	FALSE
FA 14:0	227.201	1.144	[M-H]-	100	C14H28O2	TRUE	TRUE
FA 15:0	241.218	1.213	[M-H]-	100	C15H30O2	TRUE	TRUE
FA 15:4	233.156	1.064	[M-H]-	100	C15H22O2	TRUE	TRUE
FA 16:0	255.232	1.27	[M-H]-	100	C16H32O2	TRUE	TRUE
FA 16:1	253.217	1.18	[M-H]-	100	C16H30O2	TRUE	TRUE
FA 17:0	269.249	1.347	[M-H]-	100	C17H34O2	TRUE	TRUE
FA 17:1	267.233	1.236	[M-H]-	100	C17H32O2	TRUE	TRUE
FA 18:0	283.264	1.433	[M-H]-	100	C18H36O2	TRUE	TRUE
FA 18:1	281.247	1.306	[M-H]-	100	C18H34O2	TRUE	TRUE
FA 18:1;O	297.242	1.034	[M-H]-	100	C18H34O3	TRUE	TRUE
FA 18:2	279.232	1.198	[M-H]-	100	C18H32O2	TRUE	TRUE
FA 18:3	277.217	1.121	[M-H]-	100	C18H30O2	TRUE	TRUE
FA 19:0	297.28	1.541	[M-H]-	100	C19H38O2	TRUE	TRUE
FA 20:0	311.294	1.655	[M-H]-	100	C20H40O2	TRUE	TRUE
FA 20:1	309.28	1.47	[M-H]-	100	C20H38O2	TRUE	TRUE
FA 20:2	307.263	1.329	[M-H]-	100	C20H36O2	TRUE	TRUE
FA 20:4	303.233	1.172	[M-H]-	100	C20H32O2	TRUE	TRUE
FA 20:5	301.217	1.092	[M-H]-	100	C20H30O2	TRUE	TRUE
FA 21:0	325.31	1.784	[M-H]-	100	C21H42O2	TRUE	TRUE
FA 22:0	339.324	1.938	[M-H]-	100	C22H44O2	TRUE	TRUE
FA 22:1	337.311	1.67	[M-H]-	100	C22H42O2	TRUE	TRUE
FA 22:2	335.294	1.504	[M-H]-	100	C22H40O2	TRUE	TRUE
FA 22:3	333.28	1.378	[M-H]-	100	C22H38O2	TRUE	TRUE
FA 22:4	331.263	1.27	[M-H]-	100	C22H36O2	TRUE	TRUE
FA 22:5	329.248	1.18	[M-H]-	100	C22H34O2	TRUE	TRUE
FA 22:6	327.232	1.108	[M-H]-	100	C22H32O2	TRUE	TRUE
FA 23:1	351.326	1.802	[M-H]-	100	C23H44O2	TRUE	TRUE
FA 24:0	367.357	2.331	[M-H]-	100	C24H48O2	TRUE	TRUE
FA 24:1	365.342	1.951	[M-H]-	100	C24H46O2	TRUE	TRUE
FA 24:2	363.325	1.718	[M-H]-	100	C24H44O2	TRUE	TRUE
FA 24:3	361.311	1.58	[M-H]-	—	—	—	—
FA 24:6	355.265	1.218	[M-H]-	100	C24H36O2	TRUE	FALSE
FA 26:1	393.37	2.329	[M-H]-	100	C26H50O2	TRUE	TRUE
HexCer 32:1;2O|HexCer 18:1;2O/14:0	672.538	2.227	[M+H]+	100	C38H73NO8	TRUE	TRUE
HexCer 36:1;3O|HexCer 18:1;2O/18:0;O	726.583	2.722	[M+H-H2O]+	100	C42H81NO9	TRUE	TRUE
HexCer 36:2;2O|HexCer 18:2;2O/18:0	708.577	2.724	[M+H-H2O]+	100	C42H79NO8	TRUE	TRUE
HexCer 36:2;3O|HexCer 18:2;2O/18:0;O	724.57025,742.57764	2.605	[M+H-H2O]+,[M+H]+	100	C42H79NO9	TRUE	TRUE
HexCer 41:2;2O|HexCer 18:1;2O/23:1	778.656	4.05	[M+H-H2O]+	100	C47H89NO8	TRUE	TRUE
HexCer 42:1;3O|HexCer 18:1;2O/24:0;O	828.689	4.747	[M+H]+	100	C48H93NO9	TRUE	TRUE
HexCer 42:2;2O|HexCer 18:1;2O/24:1	792.666	4.323	[M+H-H2O]+	100	C48H91NO8	TRUE	TRUE
HexCer 42:2;3O|HexCer 18:1;2O/24:1;O	808.66	4.161	[M+H-H2O]+	100	C48H91NO9	TRUE	TRUE
HexCer 42:3;3O|HexCer 18:1;2O/24:2;O	806.649	3.706	[M+H-H2O]+	100	C48H89NO9	TRUE	TRUE
HexCer 43:2;2O|HexCer 18:1;2O/25:1	806.682	4.599	[M+H-H2O]+	100	C49H93NO8	TRUE	TRUE
HexCer 44:2;2O|HexCer 18:1;2O/26:1	820.698	4.855	[M+H-H2O]+	100	C50H95NO8	TRUE	TRUE
HexCer 44:2;3O|HexCer 18:1;2O/26:1;O	854.706	4.687	[M+H]+	100	C50H95NO9	TRUE	TRUE
LPC 14:0	468.326	1.029	[M+H]+	100	C22H46NO7P	TRUE	TRUE
LPC 16:0	554.345	1.134	[M+CH3COO]-	100	C24H50NO7P	TRUE	TRUE
LPC 16:1	552.331	1.06	[M+CH3COO]-	—	C24H48NO7P	—	—
LPC 17:0	568.362	1.19	[M+CH3COO]-	—	C25H52NO7P	—	—
LPC 18:0	582.377	1.252	[M+CH3COO]-	100	C26H54NO7P	TRUE	TRUE
LPC 18:1	580.362	1.152	[M+CH3COO]-	100	C26H52NO7P	TRUE	TRUE
LPC 18:2	520.338	1.076	[M+H]+	100	C26H50NO7P	TRUE	TRUE
LPC 20:0	610.41	1.41	[M+CH3COO]-	100	C28H58NO7P	TRUE	TRUE
LPC 20:1	608.391	1.27	[M+CH3COO]-	100	C28H56NO7P	TRUE	TRUE
LPC 20:4	602.348	1.066	[M+CH3COO]-	100	C28H50NO7P	TRUE	TRUE
LPC 21:0	566.417	1.509	[M+H]+	100	C29H60NO7P	TRUE	TRUE
LPC 22:0	638.437	1.618	[M+CH3COO]-	100	C30H62NO7P	TRUE	TRUE
LPC 22:1	578.417	1.427	[M+H]+	100	C30H60NO7P	TRUE	TRUE
LPC 22:6	626.346	1.042	[M+CH3COO]-	100	C30H50NO7P	TRUE	TRUE
LPC 23:0	594.449	1.758	[M+H]+	100	C31H64NO7P	TRUE	TRUE
LPC 23:1	592.434	1.514	[M+H]+	100	C31H62NO7P	TRUE	TRUE
LPC 24:0	608.463	1.909	[M+H]+	100	C32H66NO7P	TRUE	TRUE
LPC 24:1	664.451	1.626	[M+CH3COO]-	100	C32H64NO7P	TRUE	TRUE
LPC 25:0	622.481	2.088	[M+H]+	100	C33H68NO7P	TRUE	TRUE
LPC 26:0	636.497	2.262	[M+H]+	100	C34H70NO7P	TRUE	TRUE
LPC 26:1	634.477	1.903	[M+H]+	100	C34H68NO7P	TRUE	TRUE
LPC 27:0	650.521	1.716	[M+H]+	100	C35H72NO7P	TRUE	TRUE
LPC 28:0	664.523	2.277	[M+H]+	100	C36H74NO7P	TRUE	TRUE
LPC 28:2	660.512	1.893	[M+H]+	100	C36H70NO7P	TRUE	TRUE
LPE 16:0	452.276	1.157	[M-H]-	100	C21H44NO7P	TRUE	TRUE
LPE 16:1	452.275	1.068	[M+H]+	100	C21H42NO7P	TRUE	TRUE
LPE 17:0	468.304	1.216	[M+H]+	100	C22H46NO7P	TRUE	TRUE
LPE 18:0	480.31	1.272	[M-H]-	100	C23H48NO7P	TRUE	TRUE
LPE 18:1	478.293	1.165	[M-H]-	100	C23H46NO7P	TRUE	TRUE
LPE 18:2	478.292	1.088	[M+H]+	100	C23H44NO7P	TRUE	TRUE
LPE 20:0	508.338	1.258	[M-H]-	95.5	C25H52NO7P	TRUE	TRUE
LPE 20:1	506.324	1.272	[M-H]-	100	C25H50NO7P	TRUE	TRUE
LPE 20:2	506.322	1.178	[M+H]+	100	C25H48NO7P	TRUE	TRUE
LPE 20:4	500.279	1.079	[M-H]-	100	C25H44NO7P	TRUE	TRUE
LPE 22:1	536.369	1.423	[M+H]+	100	C27H54NO7P	TRUE	TRUE
LPE 22:3	532.341	1.216	[M+H]+	100	C27H50NO7P	TRUE	TRUE
LPE 22:4	528.31	1.147	[M-H]-	100	C27H48NO7P	TRUE	TRUE
LPE 22:5	526.295	1.11	[M-H]-	—	C27H46NO7P	—	—
LPE 22:6	524.278	1.053	[M-H]-	100	C27H44NO7P	TRUE	TRUE
LPE O-16:1	436.285	1.221	[M-H]-	100	C21H44NO6P	TRUE	TRUE
LPE O-16:2	436.283	1.151	[M+H]+	97.6	C21H42NO6P	TRUE	TRUE
LPE O-18:1	464.315	1.357	[M-H]-	100	C23H48NO6P	TRUE	TRUE
LPE O-18:2	462.298	1.242	[M-H]-	100	C23H46NO6P	TRUE	TRUE
LPE O-20:2	492.343	1.373	[M+H]+	100	C25H50NO6P	TRUE	TRUE
LPE O-26:7	564.347	1.818	[M-H]-	93.2	C31H52NO6P	TRUE	TRUE
LPG 22:6	555.269	0.845	[M-H]-	100	C28H45O9P	TRUE	TRUE
MG 16:0	348.311	1.306	[M+NH4]+	100	C19H38O4	TRUE	TRUE
MG 18:1	374.325	1.337	[M+NH4]+	100	C21H40O4	TRUE	TRUE
MG 20:0	404.388	2.138	[M+NH4]+	100	C23H46O4	TRUE	TRUE
MG 20:4	396.311	1.222	[M+NH4]+	100	C23H38O4	TRUE	TRUE
MG 22:6	420.309	1.179	[M+NH4]+	100	C25H38O4	TRUE	TRUE
NAE 13:0	258.241	1.115	[M+H]+	100	C15H31NO2	TRUE	TRUE
NAE 16:0	300.29	1.274	[M+H]+	100	C18H37NO2	TRUE	TRUE
NAE 16:1	298.274	1.184	[M+H]+	100	C18H35NO2	TRUE	TRUE
NAE 16:2	296.255	1.163	[M+H]+	100	C18H33NO2	TRUE	TRUE
NAE 17:1	312.29	1.593	[M+H]+	100	C19H37NO2	TRUE	TRUE
NAE 17:2	310.272	1.239	[M+H]+	100	C19H35NO2	TRUE	TRUE
NAE 18:0	328.32	1.429	[M+H]+	100	C20H41NO2	TRUE	TRUE
NAE 18:1	326.305	1.299	[M+H]+	100	C20H39NO2	TRUE	TRUE
NAE 18:3	322.273	1.164	[M+H]+	100	C20H35NO2	TRUE	TRUE
NAE 19:0	342.337	1.361	[M+H]+	100	C21H43NO2	TRUE	TRUE
NAE 20:0	356.352	1.651	[M+H]+	100	C22H45NO2	TRUE	TRUE
NAE 20:2	352.32	1.162	[M+H]+	100	C22H41NO2	TRUE	TRUE
NAE 20:5	346.274	1.106	[M+H]+	100	C22H35NO2	TRUE	TRUE
NAE 21:1	368.352	1.397	[M+H]+	100	C23H45NO2	TRUE	TRUE
NAE 22:5	374.301	1.171	[M+H]+	100	C24H39NO2	TRUE	TRUE
NAE 24:0	412.417	2.289	[M+H]+	100	C26H53NO2	TRUE	TRUE
NAE 24:1	410.399	1.934	[M+H]+	100	C26H51NO2	TRUE	TRUE
NAE 26:1	438.43	2.282	[M+H]+	100	C28H55NO2	TRUE	TRUE
NAE 6:0	160.133	0.86	[M+H]+	100	C8H17NO2	TRUE	TRUE
PC 28:0|PC 14:0_14:0	678.504	2.069	[M+H]+	100	C36H72NO8P	TRUE	TRUE
PC 28:6	688.391	1.164	[M+Na]+	94.9	C36H60NO8P	TRUE	TRUE
PC 29:0|PC 14:0_15:0	692.519	2.228	[M+H]+	100	C37H74NO8P	TRUE	TRUE
PC 30:0|PC 14:0_16:0	706.537	2.437	[M+H]+	100	C38H76NO8P	TRUE	TRUE
PC 30:1|PC 14:0_16:1	704.519	2.139	[M+H]+	100	C38H74NO8P	TRUE	TRUE
PC 30:2|PC 12:0_18:2	702.504	1.878	[M+H]+	100	C38H72NO8P	TRUE	TRUE
PC 31:0	720.551	2.667	[M+H]+	91.7	C39H78NO8P	TRUE	TRUE
PC 31:1|PC 15:0_16:1	718.532	2.292	[M+H]+	100	C39H76NO8P	TRUE	TRUE
PC 32:0|PC 16:0_16:0	734.567	2.884	[M+H]+	100	C40H80NO8P	TRUE	TRUE
PC 32:1|PC 16:0_16:1	732.552	2.51	[M+H]+	100	C40H78NO8P	TRUE	TRUE
PC 32:2|PC 16:1_16:1	730.536	2.209	[M+H]+	100	C40H76NO8P	TRUE	TRUE
PC 33:0|PC 16:0_17:0	748.58	3.204	[M+H]+	100	C41H82NO8P	TRUE	TRUE
PC 33:1	746.566	2.754	[M+H]+	91	C41H80NO8P	TRUE	TRUE
PC 33:2|PC 15:0_18:2	744.551	2.359	[M+H]+	100	C41H78NO8P	TRUE	TRUE
PC 34:0|PC 16:0_18:0	762.598	3.465	[M+H]+	100	C42H84NO8P	TRUE	TRUE
PC 34:1|PC 16:0_18:1	760.584	2.995	[M+H]+	100	C42H82NO8P	TRUE	TRUE
PC 34:2|PC 16:0_18:2	758.568	2.598	[M+H]+	100	C42H80NO8P	TRUE	TRUE
PC 34:3	756.551	2.257	[M+H]+	91.1	C42H78NO8P	TRUE	TRUE
PC 34:4|PC 14:0_20:4	754.536	2.15	[M+H]+	100	C42H76NO8P	TRUE	TRUE
PC 35:0	776.622	3.859	[M+H]+	87.4	C43H86NO8P	TRUE	TRUE
PC 35:1	774.599	3.295	[M+H]+	89.9	C43H84NO8P	TRUE	TRUE
PC 35:2	772.583	2.815	[M+H]+	90.7	C43H82NO8P	TRUE	TRUE
PC 36:0|PC 18:0_18:0	790.626	4.04	[M+H]+	100	C44H88NO8P	TRUE	TRUE
PC 36:1	788.616	3.583	[M+H]+	91.9	C44H86NO8P	TRUE	TRUE
PC 36:2|PC 18:1_18:1	786.595	3.149	[M+H]+	100	C44H84NO8P	TRUE	TRUE
PC 36:3|PC 18:1_18:2	784.585	2.709	[M+H]+	100	C44H82NO8P	TRUE	TRUE
PC 36:4|PC 16:0_20:4	782.565	2.551	[M+H]+	100	C44H80NO8P	TRUE	TRUE
PC 36:5	780.551	2.227	[M+H]+	90.1	C44H78NO8P	TRUE	TRUE
PC 36:6|PC 14:0_22:6	778.538	2.019	[M+H]+	100	C44H76NO8P	TRUE	TRUE
PC 36:7	776.522	1.784	[M+H]+	85.6	C44H74NO8P	TRUE	TRUE
PC 37:0|PC 16:0_21:0	804.645	4.333	[M+H]+	100	C45H90NO8P	TRUE	TRUE
PC 37:1	802.633	3.863	[M+H]+	90.3	C45H88NO8P	TRUE	TRUE
PC 37:2|PC 19:0_18:2	800.612	3.383	[M+H]+	100	C45H86NO8P	TRUE	TRUE
PC 37:4|PC 17:0_20:4	796.58	2.8	[M+H]+	100	C45H82NO8P	TRUE	TRUE
PC 37:6|PC 15:0_22:6	792.552	2.193	[M+H]+	100	C45H78NO8P	TRUE	TRUE
PC 38:1	816.642	4.079	[M+H]+	89.8	C46H90NO8P	TRUE	TRUE
PC 38:2|PC 18:1_20:1	814.629	3.659	[M+H]+	100	C46H88NO8P	TRUE	TRUE
PC 38:3|PC 18:0_20:3	812.612	3.285	[M+H]+	100	C46H86NO8P	TRUE	TRUE
PC 38:4|PC 18:0_20:4	810.598	3.121	[M+H]+	100	C46H84NO8P	TRUE	TRUE
PC 38:5	808.582	2.653	[M+H]+	92.5	C46H82NO8P	TRUE	TRUE
PC 38:6|PC 16:0_22:6	806.568	2.379	[M+H]+	100	C46H80NO8P	TRUE	TRUE
PC 38:7	804.552	2.096	[M+H]+	90	C46H78NO8P	TRUE	TRUE
PC 39:1|PC 21:0_18:1	830.661	4.45	[M+H]+	100	C47H92NO8P	TRUE	TRUE
PC 39:2	828.644	3.894	[M+H]+	88.9	C47H90NO8P	TRUE	TRUE
PC 39:4|PC 19:0_20:4	824.611	3.39	[M+H]+	100	C47H86NO8P	TRUE	TRUE
PC 39:6	820.586	2.633	[M+H]+	92.4	C47H82NO8P	TRUE	TRUE
PC 39:7	818.565	2.258	[M+H]+	90.8	C47H80NO8P	TRUE	TRUE
PC 40:0|PC 16:0_24:0	846.69	5.153	[M+H]+	100	C48H96NO8P	TRUE	TRUE
PC 40:1	844.675	4.721	[M+H]+	90.7	C48H94NO8P	TRUE	TRUE
PC 40:2|PC 20:1_20:1	842.662	4.153	[M+H]+	100	C48H92NO8P	TRUE	TRUE
PC 40:4|PC 18:0_22:4	838.629	3.447	[M+H]+	100	C48H88NO8P	TRUE	TRUE
PC 40:6	834.599	2.86	[M+H]+	92.7	C48H84NO8P	TRUE	TRUE
PC 40:7	832.584	2.464	[M+H]+	86.1	C48H82NO8P	TRUE	TRUE
PC 40:8|PC 18:2_22:6	830.567	2.151	[M+H]+	100	C48H80NO8P	TRUE	TRUE
PC 40:9	850.53	1.923	[M+Na]+	90.6	C48H78NO8P	TRUE	TRUE
PC 41:1	858.69	4.999	[M+H]+	89.9	C49H96NO8P	TRUE	TRUE
PC 41:2	856.675	4.433	[M+H]+	90.9	C49H94NO8P	TRUE	TRUE
PC 41:3	854.662	3.989	[M+H]+	83.8	C49H92NO8P	TRUE	TRUE
PC 41:6	848.616	3.198	[M+H]+	90.8	C49H86NO8P	TRUE	TRUE
PC 41:7	846.598	2.689	[M+H]+	89.5	C49H84NO8P	TRUE	TRUE
PC 41:8	844.584	2.277	[M+H]+	80.1	C49H82NO8P	TRUE	TRUE
PC 42:0|PC 16:0_26:0	874.719	5.648	[M+H]+	100	C50H100NO8P	TRUE	TRUE
PC 42:1|PC 24:0_18:1	872.708	5.258	[M+H]+	100	C50H98NO8P	TRUE	TRUE
PC 42:10|PC 20:4_22:6	854.569	2.091	[M+H]+	100	C50H80NO8P	TRUE	TRUE
PC 42:2	870.695	4.695	[M+H]+	92.1	C50H96NO8P	TRUE	TRUE
PC 42:4	866.66	3.876	[M+H]+	91.7	C50H92NO8P	TRUE	TRUE
PC 42:5	864.644	3.42	[M+H]+	85.4	C50H90NO8P	TRUE	TRUE
PC 42:7-1	860.615	2.763	[M+H]+	88.4	C50H86NO8P	TRUE	TRUE
PC 42:8	858.599	2.497	[M+H]+	93.3	C50H84NO8P	TRUE	TRUE
PC 42:9	856.584	2.226	[M+H]+	89.3	C50H82NO8P	TRUE	TRUE
PC 43:10|PC 21:4_22:6	868.583	2.806	[M+H]+	100	C51H82NO8P	TRUE	TRUE
PC 43:2	884.707	4.966	[M+H]+	91.8	C51H98NO8P	TRUE	TRUE
PC 43:4	880.677	4.558	[M+H]+	93	C51H94NO8P	TRUE	TRUE
PC 43:5|PC 23:1_20:4	878.654	3.97	[M+H]+	100	C51H92NO8P	TRUE	TRUE
PC 43:9	870.591	2.132	[M+H]+	82.3	C51H84NO8P	TRUE	TRUE
PC 44:1|PC 26:0_18:1	900.738	5.749	[M+H]+	100	C52H102NO8P	TRUE	TRUE
PC 44:12|PC 22:6_22:6	878.566	1.97	[M+H]+	100	C52H80NO8P	TRUE	TRUE
PC 44:2	898.723	5.224	[M+H]+	92.3	C52H100NO8P	TRUE	TRUE
PC 44:4|PC 24:0_20:4	894.692	4.832	[M+H]+	100	C52H96NO8P	TRUE	TRUE
PC 44:7	888.644	3.475	[M+H]+	91.3	C52H90NO8P	TRUE	TRUE
PC 45:4|PC 25:0_20:4	908.704	5.509	[M+H]+	100	C53H98NO8P	TRUE	TRUE
PC 46:10	910.636	2.72	[M+H]+	83.5	C54H88NO8P	TRUE	TRUE
PC 46:12	928.579	2.169	[M+Na]+	91.6	C54H84NO8P	TRUE	TRUE
PC 46:2	926.757	5.697	[M+H]+	91.6	C54H104NO8P	TRUE	TRUE
PC 46:4|PC 26:0_20:4	922.724	5.356	[M+H]+	100	C54H100NO8P	TRUE	TRUE
PC 46:5	920.706	4.794	[M+H]+	89.6	C54H98NO8P	TRUE	TRUE
PC 46:7	916.676	4.04	[M+H]+	90.1	C54H94NO8P	TRUE	TRUE
PC 50:4	978.788	5.753	[M+H]+	88.5	C58H108NO8P	TRUE	TRUE
PC 50:6	974.755	4.986	[M+H]+	89.4	C58H104NO8P	TRUE	TRUE
PC 52:4	1006.82	6.198	[M+H]+	93	C60H112NO8P	TRUE	TRUE
PC 52:6	1002.79	5.465	[M+H]+	91	C60H108NO8P	TRUE	TRUE
PC 52:7	1000.77	5.085	[M+H]+	88.8	C60H106NO8P	TRUE	TRUE
PC 54:5	1032.83	6.274	[M+H]+	89	C62H114NO8P	TRUE	TRUE
PC 54:6	1030.82	5.922	[M+H]+	91.2	C62H112NO8P	TRUE	TRUE
PC 54:7	1028.8	5.556	[M+H]+	89.5	C62H110NO8P	TRUE	TRUE
PC 54:8	1026.78	5.464	[M+H]+	84.8	C62H108NO8P	TRUE	TRUE
PC 56:10	1050.79	5.171	[M+H]+	91.5	C64H108NO8P	TRUE	TRUE
PC 56:12	1046.75	4.47	[M+H]+	90.1	C64H104NO8P	TRUE	TRUE
PC 56:6	1058.85	6.357	[M+H]+	92.8	C64H116NO8P	TRUE	TRUE
PC 56:7	1056.84	6.004	[M+H]+	88	C64H114NO8P	TRUE	TRUE
PC 56:8	1054.82	5.928	[M+H]+	91.4	C64H112NO8P	TRUE	TRUE
PC 56:9	1052.8	5.54	[M+H]+	88.5	C64H110NO8P	TRUE	TRUE
PC 58:12	1074.78	4.988	[M+H]+	88.2	C66H108NO8P	TRUE	TRUE
PC 58:7	1084.86	6.441	[M+H]+	88.8	C66H118NO8P	TRUE	TRUE
PC 58:8	1082.85	6.354	[M+H]+	87.1	C66H116NO8P	TRUE	TRUE
PC 58:9	1080.83	5.986	[M+H]+	88.6	C66H114NO8P	TRUE	TRUE
PC 60:10|PC 30:5_30:5	1106.85	6.096	[M+H]+	100	C68H116NO8P	TRUE	TRUE
PC 60:12|PC 30:6_30:6	1102.81	5.476	[M+H]+	100	C68H112NO8P	TRUE	TRUE
PC 62:12	1130.85	5.927	[M+H]+	88.8	C70H116NO8P	TRUE	TRUE
PC O-29:1	676.529	1.882	[M+H]+	93.1	C37H74NO7P	TRUE	TRUE
PC O-30:0	692.556	2.753	[M+H]+	100	C38H78NO7P	TRUE	TRUE
PC O-30:1	690.54	2.733	[M+H]+	97.5	C38H76NO7P	TRUE	TRUE
PC O-32:0	720.588	3.289	[M+H]+	100	C40H82NO7P	TRUE	TRUE
PC O-32:1	718.574	2.811	[M+H]+	100	C40H80NO7P	TRUE	TRUE
PC O-33:0	734.605	3.737	[M+H]+	92.4	C41H84NO7P	TRUE	TRUE
PC O-34:0	748.619	3.866	[M+H]+	100	C42H86NO7P	TRUE	TRUE
PC O-34:1	746.603	3.378	[M+H]+	97.6	C42H84NO7P	TRUE	TRUE
PC O-35:0	762.644	4.278	[M+H]+	92.7	C43H88NO7P	TRUE	TRUE
PC O-35:1	760.622	3.821	[M+H]+	94.2	C43H86NO7P	TRUE	TRUE
PC O-36:0	776.651	4.43	[M+H]+	100	C44H90NO7P	TRUE	TRUE
PC O-36:1	774.633	3.958	[M+H]+	98.1	C44H88NO7P	TRUE	TRUE
PC O-36:3	770.598	3.413	[M+H]+	92.5	C44H84NO7P	TRUE	TRUE
PC O-36:5	766.572	2.829	[M+H]+	90.3	C44H80NO7P	TRUE	TRUE
PC O-38:0	804.678	4.985	[M+H]+	100	C46H94NO7P	TRUE	TRUE
PC O-38:3	798.633	3.942	[M+H]+	95.7	C46H88NO7P	TRUE	TRUE
PC O-38:4	796.619	3.269	[M+H]+	100	C46H86NO7P	TRUE	TRUE
PC O-38:6	792.585	2.699	[M+H]+	99.6	C46H82NO7P	TRUE	TRUE
PC O-39:10	798.54	3.343	[M+H]+	89.8	C47H76NO7P	TRUE	TRUE
PC O-39:8	802.572	3.924	[M+H]+	92.5	C47H80NO7P	TRUE	TRUE
PC O-39:9	800.552	3.411	[M+H]+	92.7	C47H78NO7P	TRUE	TRUE
PC O-40:1	830.698	4.957	[M+H]+	100	C48H96NO7P	TRUE	TRUE
PC O-40:4	824.647	4.069	[M+H]+	95.7	C48H90NO7P	TRUE	TRUE
PC O-40:6	820.615	3.272	[M+H]+	96.2	C48H86NO7P	TRUE	TRUE
PC O-40:7	818.605	2.76	[M+H]+	100	C48H84NO7P	TRUE	TRUE
PC O-41:1	844.718	5.335	[M+H]+	92.8	C49H98NO7P	TRUE	TRUE
PC O-41:10	826.57	3.925	[M+H]+	91.2	C49H80NO7P	TRUE	TRUE
PC O-41:11	824.546	3.917	[M+H]+	91.7	C49H78NO7P	TRUE	TRUE
PC O-41:9	828.603	2.945	[M+H]+	85.2	C49H82NO7P	TRUE	TRUE
PC O-42:2	856.715	5.016	[M+H]+	100	C50H98NO7P	TRUE	TRUE
PC O-43:3	868.73	4.324	[M+H]+	84.8	C51H98NO7P	TRUE	TRUE
PE 19:1	508.302	1.164	[M+H]+	96.1	C24H46NO8P	TRUE	TRUE
PE 21:1	536.335	1.279	[M+H]+	98.6	C26H50NO8P	TRUE	TRUE
PE 21:3	554.288	1.054	[M+Na]+	95.1	C26H46NO8P	TRUE	TRUE
PE 23:4	558.319	1.147	[M+H]+	96.6	C28H48NO8P	TRUE	TRUE
PE 32:1|PE 16:0_16:1	690.504	2.613	[M+H]+	100	C37H72NO8P	TRUE	TRUE
PE 32:2|PE 16:1_16:1	688.489	2.245	[M+H]+	100	C37H70NO8P	TRUE	TRUE
PE 33:1|PE 16:0_17:1	702.506	2.906	[M-H]-	100	C38H74NO8P	TRUE	TRUE
PE 34:1|PE 16:0_18:1	716.52	3.155	[M-H]-	100	C39H76NO8P	TRUE	TRUE
PE 34:2|PE 16:0_18:2	716.519	2.694	[M+H]+	100	C39H74NO8P	TRUE	TRUE
PE 34:3|PE 16:1_18:2	714.505	2.312	[M+H]+	100	C39H72NO8P	TRUE	TRUE
PE 34:4|PE 16:1_18:3	712.501	2.186	[M+H]+	100	C39H70NO8P	TRUE	TRUE
PE 35:1|PE 17:0_18:1	732.546	3.415	[M+H]+	100	C40H78NO8P	TRUE	TRUE
PE 36:0|PE 18:0_18:0	748.582	4.105	[M+H]+	100	C41H82NO8P	TRUE	TRUE
PE 36:1|PE 18:0_18:1	746.567	3.709	[M+H]+	100	C41H80NO8P	TRUE	TRUE
PE 36:2|PE 18:1_18:1	744.551	3.247	[M+H]+	100	C41H78NO8P	TRUE	TRUE
PE 36:3|PE 18:1_18:2	742.536	2.788	[M+H]+	100	C41H76NO8P	TRUE	TRUE
PE 36:4|PE 16:0_20:4	740.519	2.654	[M+H]+	100	C41H74NO8P	TRUE	TRUE
PE 36:4|PE 18:2_18:2	740.522	2.367	[M+H]+	100	C41H74NO8P	TRUE	TRUE
PE 36:5|PE 16:1_20:4	738.504	2.282	[M+H]+	100	C41H72NO8P	TRUE	TRUE
PE 36:6|PE 14:0_22:6	736.492	2.098	[M+H]+	100	C41H70NO8P	TRUE	TRUE
PE 37:1|PE 18:0_19:1	758.562	3.977	[M-H]-	100	C42H82NO8P	TRUE	TRUE
PE 37:2|PE 18:1_19:1	756.555	3.463	[M-H]-	100	C42H80NO8P	TRUE	TRUE
PE 37:4|PE 17:0_20:4	752.522	2.933	[M-H]-	100	C42H76NO8P	TRUE	TRUE
PE 37:5;2O|PE 20:4_17:1;2O	782.494	2.148	[M-H]-	100	C42H74NO10P	TRUE	TRUE
PE 37:6|PE 15:0_22:6	750.507	2.25	[M+H]+	100	C42H72NO8P	TRUE	TRUE
PE 38:1|PE 18:0_20:1	774.598	4.203	[M+H]+	100	C43H84NO8P	TRUE	TRUE
PE 38:2|PE 18:1_20:1	772.582	3.735	[M+H]+	100	C43H82NO8P	TRUE	TRUE
PE 38:4|PE 18:0_20:4	768.55	3.217	[M+H]+	100	C43H78NO8P	TRUE	TRUE
PE 38:5|PE 18:1_20:4	766.536	2.731	[M+H]+	100	C43H76NO8P	TRUE	TRUE
PE 38:6|PE 16:0_22:6	764.521	2.47	[M+H]+	100	C43H74NO8P	TRUE	TRUE
PE 38:7|PE 16:1_22:6	762.508	2.149	[M+H]+	100	C43H72NO8P	TRUE	TRUE
PE 38:8	760.491	1.931	[M+H]+	91.8	C43H70NO8P	TRUE	TRUE
PE 39:6|PE 17:0_22:6	778.536	2.715	[M+H]+	100	C44H76NO8P	TRUE	TRUE
PE 40:10|PE 20:5_20:5	784.488	2.145	[M+H]+	100	C45H70NO8P	TRUE	TRUE
PE 40:2|PE 20:1_20:1	800.611	4.251	[M+H]+	100	C45H86NO8P	TRUE	TRUE
PE 40:3|PE 18:0_22:3	798.597	4.005	[M+H]+	100	C45H84NO8P	TRUE	TRUE
PE 40:4	796.583	3.785	[M+H]+	91	C45H82NO8P	TRUE	TRUE
PE 40:4|PE 18:0_22:4	796.582	3.569	[M+H]+	100	C45H82NO8P	TRUE	TRUE
PE 40:6|PE 18:0_22:6	790.536	3.04	[M-H]-	100	C45H78NO8P	TRUE	TRUE
PE 40:7|PE 18:1_22:6	788.524	2.556	[M-H]-	100	C45H76NO8P	TRUE	TRUE
PE 40:8	810.509	2.184	[M+Na]+	95.1	C45H74NO8P	TRUE	TRUE
PE 40:9|PE 18:3_22:6	786.507	1.964	[M+H]+	100	C45H72NO8P	TRUE	TRUE
PE 41:1|PE 23:0_18:1	814.629	5.1	[M-H]-	100	C46H90NO8P	TRUE	TRUE
PE 42:1|PE 24:0_18:1	828.644	5.36	[M-H]-	100	C47H92NO8P	TRUE	TRUE
PE 42:4|PE 18:0_24:4	824.612	3.983	[M+H]+	100	C47H86NO8P	TRUE	TRUE
PE 42:5|PE 18:0_24:5	822.598	3.757	[M+H]+	100	C47H84NO8P	TRUE	TRUE
PE 42:7|PE 20:1_22:6	816.554	3.087	[M-H]-	100	C47H80NO8P	TRUE	TRUE
PE 42:9;2O|PE 22:6_20:3;2O	844.514	2.477	[M-H]-	93.9	C47H76NO10P	TRUE	TRUE
PE 42:9;O|PE 22:6_20:3;O	828.515	2.782	[M-H]-	100	C47H76NO9P	TRUE	TRUE
PE 44:10|PE 22:4_22:6	838.54	2.406	[M-H]-	100	C49H78NO8P	TRUE	TRUE
PE 44:12|PE 22:6_22:6	836.521	2.045	[M+H]+	100	C49H74NO8P	TRUE	TRUE
PE 46:12	864.553	2.239	[M+H]+	92.8	C51H78NO8P	TRUE	TRUE
PE O-36:4|PE O-16:0_20:4	724.525	3.158	[M-H]-	100	C41H76NO7P	TRUE	TRUE
PE O-36:6|PE O-16:1_20:5	720.494	2.585	[M-H]-	100	C41H72NO7P	TRUE	TRUE
PE O-37:6|PE O-17:2_20:4	734.51	2.901	[M-H]-	100	C42H74NO7P	TRUE	TRUE
PE O-38:4|PE O-18:2_20:2	752.554	3.767	[M-H]-	100	C43H80NO7P	TRUE	TRUE
PE O-39:5|PE O-17:1_22:4	764.559	3.652	[M-H]-	100	C44H80NO7P	TRUE	TRUE
PE O-39:5|PE O-19:1_20:4	764.557	3.851	[M-H]-	100	C44H80NO7P	TRUE	TRUE
PE O-39:8|PE O-17:2_22:6	758.51	2.59	[M-H]-	100	C44H74NO7P	TRUE	TRUE
PE O-42:2|PE O-18:1_24:1	812.645	5.57	[M-H]-	100	C47H92NO7P	TRUE	TRUE
PE O-42:9|PE O-20:3_22:6	798.535	2.912	[M-H]-	100	C47H80NO7P	TRUE	TRUE
PE P-32:0|PE P-16:0_16:0	676.523	3.409	[M+H]+	100	C37H74NO7P	TRUE	TRUE
PE P-32:1|PE P-18:1_14:0	674.513	2.927	[M+H]+	100	C37H72NO7P	TRUE	TRUE
PE P-33:1|PE P-16:0_17:1	688.524	3.238	[M+H]+	100	C38H74NO7P	TRUE	TRUE
PE P-34:1|PE P-18:1_16:0	702.54	3.491	[M+H]+	100	C39H76NO7P	TRUE	TRUE
PE P-34:2|PE P-16:0_18:2	700.524	3.093	[M+H]+	100	C39H74NO7P	TRUE	TRUE
PE P-35:1|PE P-17:0_18:1	716.556	3.784	[M+H]+	100	C40H78NO7P	TRUE	TRUE
PE P-35:2|PE P-17:1_18:1	714.541	3.299	[M+H]+	100	C40H76NO7P	TRUE	TRUE
PE P-36:1|PE P-18:0_18:1	730.57	4.059	[M+H]+	100	C41H80NO7P	TRUE	TRUE
PE P-36:2|PE P-18:1_18:1	728.555	3.567	[M+H]+	100	C41H78NO7P	TRUE	TRUE
PE P-36:4|PE P-16:0_20:4	724.524	2.958	[M+H]+	100	C41H74NO7P	TRUE	TRUE
PE P-36:6|PE P-14:0_22:6	720.494	2.294	[M+H]+	100	C41H70NO7P	TRUE	TRUE
PE P-37:1|PE P-17:0_20:1	744.585	4.284	[M+H]+	100	C42H82NO7P	TRUE	TRUE
PE P-37:2|PE P-18:1_19:1	742.572	3.821	[M+H]+	100	C42H80NO7P	TRUE	TRUE
PE P-37:4|PE P-17:0_20:4	738.544	3.268	[M+H]+	100	C42H76NO7P	TRUE	TRUE
PE P-38:1|PE P-18:0_20:1	758.603	4.562	[M+H]+	100	C43H84NO7P	TRUE	TRUE
PE P-38:2|PE P-18:1_20:1	756.588	4.073	[M+H]+	100	C43H82NO7P	TRUE	TRUE
PE P-38:4|PE P-16:0_22:4	752.557	3.36	[M+H]+	100	C43H78NO7P	TRUE	TRUE
PE P-38:4|PE P-18:0_20:4	752.557	3.546	[M+H]+	100	C43H78NO7P	TRUE	TRUE
PE P-38:5|PE P-18:1_20:4	750.541	3.081	[M+H]+	100	C43H76NO7P	TRUE	TRUE
PE P-38:6|PE P-16:0_22:6	748.526	2.765	[M+H]+	100	C43H74NO7P	TRUE	TRUE
PE P-39:2|PE P-18:1_21:1	770.602	4.322	[M+H]+	100	C44H84NO7P	TRUE	TRUE
PE P-40:1|PE P-18:0_22:1	786.632	5.066	[M+H]+	100	C45H88NO7P	TRUE	TRUE
PE P-40:2|PE P-18:1_22:1	784.617	4.598	[M+H]+	100	C45H86NO7P	TRUE	TRUE
PE P-40:4|PE P-18:0_22:4	780.588	3.918	[M+H]+	100	C45H82NO7P	TRUE	TRUE
PE P-40:5|PE P-18:0_22:5	778.573	3.755	[M+H]+	100	C45H80NO7P	TRUE	TRUE
PE P-40:6|PE P-18:0_22:6	776.556	3.338	[M+H]+	100	C45H78NO7P	TRUE	TRUE
PE P-40:7|PE P-18:1_22:6	774.541	2.814	[M+H]+	100	C45H76NO7P	TRUE	TRUE
PE P-40:8|PE P-18:2_22:6	772.527	2.435	[M+H]+	100	C45H74NO7P	TRUE	TRUE
PE P-40:9|PE P-18:3_22:6	770.512	2.17	[M+H]+	100	C45H72NO7P	TRUE	TRUE
PE P-41:2|PE P-18:1_23:1	798.635	4.839	[M+H]+	100	C46H88NO7P	TRUE	TRUE
PE P-42:1|PE P-18:1_24:0	814.667	5.216	[M+H]+	100	C47H92NO7P	TRUE	TRUE
PE P-42:2|PE P-18:1_24:1	812.651	5.105	[M+H]+	100	C47H90NO7P	TRUE	TRUE
PE P-42:4|PE P-18:0_24:4	808.621	4.333	[M+H]+	100	C47H86NO7P	TRUE	TRUE
PE P-42:6|PE P-18:0_24:6	804.588	3.689	[M+H]+	100	C47H82NO7P	TRUE	TRUE
PE P-42:6|PE P-20:0_22:6	804.589	3.919	[M+H]+	100	C47H82NO7P	TRUE	TRUE
PE P-42:7|PE P-18:1_24:6	802.577	3.181	[M+H]+	100	C47H80NO7P	TRUE	TRUE
PE P-42:7|PE P-20:1_22:6	802.571	3.377	[M+H]+	100	C47H80NO7P	TRUE	TRUE
PE P-44:7|PE P-22:1_22:6	830.6	3.92	[M+H]+	100	C49H84NO7P	TRUE	TRUE
PEtOH 40:2|PEtOH 20:1_20:1	783.6	3.925	[M-H]-	100	C45H85O8P	TRUE	TRUE
PG 34:1|PG 16:0_18:1	747.516	2.104	[M-H]-	100	C40H77O10P	TRUE	TRUE
PG 34:2|PG 16:0_18:2	764.54	1.796	[M+NH4]+	100	C40H75O10P	TRUE	TRUE
PG 36:2|PG 18:1_18:1-1	773.533	2.12	[M-H]-	100	C42H79O10P	TRUE	TRUE
PG 36:4|PG 16:0_20:4	769.501	1.765	[M-H]-	100	C42H75O10P	TRUE	TRUE
PG 40:7|PG 18:1_22:6	819.517	1.517	[M-H]-	100	C46H77O10P	TRUE	TRUE
PG 40:8|PG 18:2_22:6	817.502	1.394	[M-H]-	100	C46H75O10P	TRUE	TRUE
PG 42:9|PG 20:3_22:6	843.513	1.444	[M-H]-	93.4	C48H77O10P	TRUE	TRUE
PI 32:0	828.551	1.944	[M+NH4]+	100	C41H79O13P	TRUE	TRUE
PI 36:1	882.598	2.328	[M+NH4]+	100	C45H85O13P	TRUE	TRUE
PI 36:2	880.588	2.054	[M+NH4]+	100	C45H83O13P	TRUE	TRUE
PI 36:4|PI 16:0_20:4	857.517	1.726	[M-H]-	100	C45H79O13P	TRUE	TRUE
PI 36:5	874.541	1.563	[M+NH4]+	100	C45H77O13P	TRUE	TRUE
PI 37:4	895.528	1.885	[M+Na]+	100	C46H81O13P	TRUE	TRUE
PI 38:3	906.6	2.196	[M+NH4]+	100	C47H85O13P	TRUE	TRUE
PI 38:4	904.59	2.032	[M+NH4]+	100	C47H83O13P	TRUE	TRUE
PI 38:5|PI 18:1_20:4	883.534	1.763	[M-H]-	100	C47H81O13P	TRUE	TRUE
PI 38:6|PI 16:0_22:6	881.516	1.634	[M-H]-	100	C47H79O13P	TRUE	TRUE
PI 39:6|PI 17:0_22:6	895.53	1.752	[M-H]-	100	C48H81O13P	TRUE	TRUE
PI 40:3	915.591	1.657	[M-H]-	88	C49H89O13P	TRUE	TRUE
PI 40:4	932.618	2.281	[M+NH4]+	100	C49H87O13P	TRUE	TRUE
PI 40:7	926.575	1.678	[M+NH4]+	100	C49H81O13P	TRUE	TRUE
PI 40:8|PI 20:4_20:4	905.519	1.525	[M-H]-	100	C49H79O13P	TRUE	TRUE
PI 42:10|PI 20:4_22:6	929.518	1.457	[M-H]-	100	C51H79O13P	TRUE	TRUE
PS 32:1|PS 16:0_16:1	734.494	1.801	[M+H]+	100	C38H72NO10P	TRUE	TRUE
PS 35:1|PS 17:0_18:1	776.544	2.27	[M+H]+	100	C41H78NO10P	TRUE	TRUE
PS 36:2|PS 18:1_18:1	788.543	2.149	[M+H]+	100	C42H78NO10P	TRUE	TRUE
PS 38:2|PS 18:1_20:1	816.57	2.522	[M+H]+	100	C44H82NO10P	TRUE	TRUE
PS 38:4|PS 18:0_20:4	812.533	2.144	[M+H]+	100	C44H78NO10P	TRUE	TRUE
PS 40:6|PS 18:0_22:6	836.545	1.999, 2,126	[M+H]+	100	C46H78NO10P	TRUE	TRUE
PS 41:6|PS 19:0_22:6	850.553	2.149	[M+H]+	100	C47H80NO10P	TRUE	TRUE
PS 42:10|PS 20:4_22:6	856.51	1.533	[M+H]+	100	C48H74NO10P	TRUE	TRUE
PS 42:8	882.531	1.502	[M+Na]+	87	C48H78NO10P	TRUE	TRUE
PS 44:10|PS 22:4_22:6	884.538	1.693	[M+H]+	100	C50H78NO10P	TRUE	TRUE
PS 44:12|PS 22:6_22:6	880.511	1.46	[M+H]+	100	C50H74NO10P	TRUE	TRUE
PS 46:11|PS 24:5_22:6	910.554	1.757	[M+H]+	100	C52H80NO10P	TRUE	TRUE
PS 46:12|PS 22:6_24:6	908.542	1.609	[M+H]+	100	C52H78NO10P	TRUE	TRUE
SM 31:1;2O	661.524	1.961	[M+H]+	100	C36H73N2O6P	TRUE	TRUE
SM 32:1;2O	675.541	2.12	[M+H]+	100	C37H75N2O6P	TRUE	TRUE
SM 32:2;2O	673.524	1.848	[M+H]+	100	C37H73N2O6P	TRUE	TRUE
SM 33:1;2O|SM 17:1;2O/16:0	689.556	2.282	[M+H]+	100	C38H77N2O6P	TRUE	TRUE
SM 34:0;2O	705.585	2.66	[M+H]+	100	C39H81N2O6P	TRUE	TRUE
SM 34:0;3O	721.582	2.27	[M+H]+	100	C39H81N2O7P	TRUE	TRUE
SM 34:1;2O	703.573	2.492	[M+H]+	100	C39H79N2O6P	TRUE	TRUE
SM 34:1;3O	719.572	2.329	[M+H]+	100	C39H79N2O7P	TRUE	TRUE
SM 34:2;2O|SM 18:2;2O/16:0	701.561	2.169	[M+H]+	100	C39H77N2O6P	TRUE	TRUE
SM 34:2;3O	717.554	2.051	[M+H]+	100	C39H77N2O7P	TRUE	TRUE
SM 35:1;2O	717.583	2.749	[M+H]+	100	C40H81N2O6P	TRUE	TRUE
SM 36:0;2O	733.615	3.202	[M+H]+	100	C41H85N2O6P	TRUE	TRUE
SM 36:1;2O|SM 18:1;2O/18:0	731.604	2.997	[M+H]+	100	C41H83N2O6P	TRUE	TRUE
SM 36:2;2O|SM 18:1;2O/18:1	729.59	2.582	[M+H]+	100	C41H81N2O6P	TRUE	TRUE
SM 36:3;2O	727.572	2.242	[M+H]+	100	C41H79N2O6P	TRUE	TRUE
SM 38:1;2O|SM 18:1;2O/20:0	759.634	3.572	[M+H]+	100	C43H87N2O6P	TRUE	TRUE
SM 38:2;2O|SM 18:2;2O/20:0	757.621	3.162	[M+H]+	100	C43H85N2O6P	TRUE	TRUE
SM 39:1;2O	773.648	3.93	[M+H]+	100	C44H89N2O6P	TRUE	TRUE
SM 40:0;3O	805.676	3.895	[M+H]+	100	C45H93N2O7P	TRUE	TRUE
SM 40:1;2O	787.663	4.189	[M+H]+	100	C45H91N2O6P	TRUE	TRUE
SM 40:2;2O|SM 18:1;2O/22:1	785.65	3.726	[M+H]+	100	C45H89N2O6P	TRUE	TRUE
SM 40:7;2O|SM 18:2;2O/22:5	775.565	2.116	[M+H]+	100	C45H79N2O6P	TRUE	TRUE
SM 41:0;3O	819.692	4.193	[M+H]+	100	C46H95N2O7P	TRUE	TRUE
SM 41:1;2O	801.68	4.542	[M+H]+	100	C46H93N2O6P	TRUE	TRUE
SM 41:2;2O|SM 18:1;2O/23:1	799.664	4.029	[M+H]+	100	C46H91N2O6P	TRUE	TRUE
SM 41:2;2O|SM 18:2;2O/23:0	799.666	3.886	[M+H]+	100	C46H91N2O6P	TRUE	TRUE
SM 41:3;2O	797.654	3.408	[M+H]+	100	C46H89N2O6P	TRUE	TRUE
SM 42:1;2O	815.696	4.759	[M+H]+	100	C47H95N2O6P	TRUE	TRUE
SM 42:1;3O	831.686	3.886	[M+H]+	100	C47H95N2O7P	TRUE	TRUE
SM 42:2;2O	813.677	4.156	[M+H]+	100	C47H93N2O6P	TRUE	TRUE
SM 42:3;2O	811.664	3.7	[M+H]+	100	C47H91N2O6P	TRUE	TRUE
SM 42:4;2O	809.657	3.24	[M+H]+	91.3	C47H89N2O6P	TRUE	TRUE
SM 43:2;2O	827.7	4.596	[M+H]+	100	C48H95N2O6P	TRUE	TRUE
SM 43:2;2O|SM 18:2;2O/25:0	827.693	4.428	[M+H]+	100	C48H95N2O6P	TRUE	TRUE
ST 27:1;O	369.351	2.137	[M+H-H2O]+	99.9	C27H46O	TRUE	TRUE
ST 27:2;O	367.335	1.811	[M+H-H2O]+	100	C27H44O	TRUE	TRUE
ST 28:2;O	399.359	1.818	[M+H]+	93.7	C28H46O	TRUE	TRUE
TG 36:0|TG 10:0_12:0_14:0	656.578	4.915	[M+NH4]+	100	C39H74O6	TRUE	TRUE
TG 38:1|TG 8:0_12:0_18:1	682.594	4.985	[M+NH4]+	100	C41H76O6	TRUE	TRUE
TG 40:0|TG 12:0_14:0_14:0	712.643	5.805	[M+NH4]+	100	C43H82O6	TRUE	TRUE
TG 40:1|TG 8:0_16:0_16:1	710.625	5.457	[M+NH4]+	100	C43H80O6	TRUE	TRUE
TG 40:2|TG 8:0_14:0_18:2	708.609	5.043	[M+NH4]+	100	C43H78O6	TRUE	TRUE
TG 41:2|TG 8:0_15:0_18:2	722.627	5.281	[M+NH4]+	100	C44H80O6	TRUE	TRUE
TG 42:0|TG 12:0_14:0_16:0	740.672	6.212	[M+NH4]+	100	C45H86O6	TRUE	TRUE
TG 42:1|TG 8:0_16:0_18:1	738.656	5.87	[M+NH4]+	100	C45H84O6	TRUE	TRUE
TG 42:2|TG 8:0_16:0_18:2	736.64	5.497	[M+NH4]+	100	C45H82O6	TRUE	TRUE
TG 42:3|TG 8:0_16:1_18:2	734.624	5.105	[M+NH4]+	100	C45H80O6	TRUE	TRUE
TG 42:4|TG 8:0_16:2_18:2	732.612	4.67	[M+NH4]+	100	C45H78O6	TRUE	TRUE
TG 43:0|TG 12:0_15:0_16:0	754.688	6.387	[M+NH4]+	100	C46H88O6	TRUE	TRUE
TG 43:2|TG 9:0_16:0_18:2	750.659	5.709	[M+NH4]+	100	C46H84O6	TRUE	TRUE
TG 44:0|TG 14:0_14:0_16:0	768.702	6.601	[M+NH4]+	100	C47H90O6	TRUE	TRUE
TG 44:1|TG 10:0_16:0_18:1	766.688	6.264	[M+NH4]+	100	C47H88O6	TRUE	TRUE
TG 44:2|TG 10:0_16:0_18:2	764.675	5.911	[M+NH4]+	100	C47H86O6	TRUE	TRUE
TG 44:3|TG 10:0_16:1_18:2	762.658	5.548	[M+NH4]+	100	C47H84O6	TRUE	TRUE
TG 44:4|TG 10:0_16:1_18:3	760.641	5.347	[M+NH4]+	100	C47H82O6	TRUE	TRUE
TG 44:4|TG 8:0_18:2_18:2	760.645	5.155	[M+NH4]+	100	C47H82O6	TRUE	TRUE
TG 45:1|TG 14:0_15:0_16:1	780.703	6.445	[M+NH4]+	100	C48H90O6	TRUE	TRUE
TG 45:2|TG 11:0_16:0_18:2	778.69	6.114	[M+NH4]+	100	C48H88O6	TRUE	TRUE
TG 45:4|TG 9:0_18:2_18:2	774.663	5.543	[M+NH4]+	100	C48H84O6	TRUE	TRUE
TG 46:1|TG 14:0_16:0_16:1	794.719	6.641	[M+NH4]+	100	C49H92O6	TRUE	TRUE
TG 46:2|TG 12:0_16:0_18:2	792.704	6.306	[M+NH4]+	100	C49H90O6	TRUE	TRUE
TG 46:3|TG 12:0_16:1_18:2	790.688	5.97	[M+NH4]+	100	C49H88O6	TRUE	TRUE
TG 46:5|TG 14:1_14:1_18:3	791.609	5.374	[M+Na]+	100	C49H84O6	TRUE	TRUE
TG 46:6|TG 8:0_16:0_22:6	784.641	5.185	[M+NH4]+	100	C49H82O6	TRUE	TRUE
TG 47:1|TG 15:0_16:0_16:1	808.73	6.836	[M+NH4]+	100	C50H94O6	TRUE	TRUE
TG 47:2|TG 13:0_16:0_18:2	806.717	6.493	[M+NH4]+	100	C50H92O6	TRUE	TRUE
TG 47:4|TG 11:0_18:2_18:2	802.692	5.984	[M+NH4]+	100	C50H88O6	TRUE	TRUE
TG 48:1|TG 14:0_16:0_18:1	822.751	6.994	[M+NH4]+	100	C51H96O6	TRUE	TRUE
TG 48:2|TG 14:0_16:0_18:2	820.735	6.682	[M+NH4]+	100	C51H94O6	TRUE	TRUE
TG 48:3|TG 14:0_16:1_18:2	818.718	6.36	[M+NH4]+	100	C51H92O6	TRUE	TRUE
TG 48:5|TG 12:0_18:2_18:3	814.688	5.79	[M+NH4]+	100	C51H88O6	TRUE	TRUE
TG 49:2|TG 15:0_16:0_18:2	834.753	6.886	[M+NH4]+	100	C52H96O6	TRUE	TRUE
TG 49:3|TG 15:0_16:1_18:2	832.737	6.568	[M+NH4]+	100	C52H94O6	TRUE	TRUE
TG 49:4|TG 13:0_18:2_18:2	830.72	6.24	[M+NH4]+	100	C52H92O6	TRUE	TRUE
TG 50:1|TG 16:0_16:0_18:1	850.782	7.325	[M+NH4]+	100	C53H100O6	TRUE	TRUE
TG 50:2|TG 16:0_16:1_18:1	848.766	7.035	[M+NH4]+	100	C53H98O6	TRUE	TRUE
TG 50:3|TG 16:0_16:1_18:2	846.752	6.73	[M+NH4]+	100	C53H96O6	TRUE	TRUE
TG 50:4|TG 16:1_16:1_18:2	844.732	6.41	[M+NH4]+	100	C53H94O6	TRUE	TRUE
TG 50:7|TG 12:0_16:1_22:6	843.647	5.647	[M+Na]+	100	C53H88O6	TRUE	TRUE
TG 51:1|TG 16:0_17:0_18:1	864.795	7.494	[M+NH4]+	100	C54H102O6	TRUE	TRUE
TG 51:2|TG 16:0_17:1_18:1	862.78	7.221	[M+NH4]+	100	C54H100O6	TRUE	TRUE
TG 51:3|TG 15:0_18:1_18:2	860.766	6.926	[M+NH4]+	100	C54H98O6	TRUE	TRUE
TG 51:4|TG 15:0_18:2_18:2	858.748	6.619	[M+NH4]+	100	C54H96O6	TRUE	TRUE
TG 51:5|TG 15:0_18:2_18:3	856.732	6.305	[M+NH4]+	100	C54H94O6	TRUE	TRUE
TG 52:1|TG 16:0_18:0_18:1	878.813	7.645	[M+NH4]+	100	C55H104O6	TRUE	TRUE
TG 52:2|TG 16:0_18:1_18:1	876.798	7.368	[M+NH4]+	100	C55H102O6	TRUE	TRUE
TG 52:3|TG 16:0_18:1_18:2	874.783	7.082	[M+NH4]+	100	C55H100O6	TRUE	TRUE
TG 52:4|TG 16:0_18:2_18:2	872.765	6.776	[M+NH4]+	100	C55H98O6	TRUE	TRUE
TG 52:5|TG 16:1_18:2_18:2	870.749	6.469	[M+NH4]+	100	C55H96O6	TRUE	TRUE
TG 52:6|TG 16:1_18:2_18:3	868.733	6.239	[M+NH4]+	100	C55H94O6	TRUE	TRUE
TG 52:7|TG 18:2_18:2_16:3	866.721	6.015	[M+NH4]+	100	C55H92O6	TRUE	TRUE
TG 53:2|TG 16:0_18:1_19:1	890.813	7.531	[M+NH4]+	100	C56H104O6	TRUE	TRUE
TG 53:3|TG 17:0_18:1_18:2	888.796	7.262	[M+NH4]+	100	C56H102O6	TRUE	TRUE
TG 53:4|TG 17:1_18:1_18:2	886.78	6.97	[M+NH4]+	100	C56H100O6	TRUE	TRUE
TG 53:5|TG 17:1_18:2_18:2	884.767	6.666	[M+NH4]+	100	C56H98O6	TRUE	TRUE
TG 53:6|TG 17:1_18:2_18:3	882.751	6.364	[M+NH4]+	100	C56H96O6	TRUE	TRUE
TG 53:7|TG 15:0_18:2_20:5	880.732	6.272	[M+NH4]+	100	C56H94O6	TRUE	TRUE
TG 54:1|TG 16:0_18:0_20:1	906.846	7.942	[M+NH4]+	100	C57H108O6	TRUE	TRUE
TG 54:10|TG 18:2_16:3_20:5	888.702	5.562	[M+NH4]+	100	C57H90O6	TRUE	TRUE
TG 54:2|TG 18:0_18:1_18:1	904.827	7.68	[M+NH4]+	100	C57H106O6	TRUE	TRUE
TG 54:3|TG 18:0_18:1_18:2	902.813	7.415	[M+NH4]+	100	C57H104O6	TRUE	TRUE
TG 54:5|TG 18:1_18:2_18:2	898.78	6.848	[M+NH4]+	100	C57H100O6	TRUE	TRUE
TG 54:6|TG 18:1_18:2_18:3	896.765	6.515	[M+NH4]+	100	C57H98O6	TRUE	TRUE
TG 55:3|TG 18:1_18:1_19:1	916.827	7.577	[M+NH4]+	100	C58H106O6	TRUE	TRUE
TG 55:4|TG 18:1_19:1_18:2	914.809	7.306	[M+NH4]+	100	C58H104O6	TRUE	TRUE
TG 55:5|TG 19:1_18:2_18:2	912.801	7.011	[M+NH4]+	100	C58H102O6	TRUE	TRUE
TG 55:8|TG 15:0_18:2_22:6	906.75	6.343	[M+NH4]+	100	C58H96O6	TRUE	TRUE
TG 56:1|TG 16:0_22:0_18:1	934.876	8.228	[M+NH4]+	100	C59H112O6	TRUE	TRUE
TG 56:10|TG 18:2_18:3_20:5	916.735	5.888	[M+NH4]+	100	C59H94O6	TRUE	TRUE
TG 56:2|TG 18:0_18:1_20:1	932.859	7.969	[M+NH4]+	100	C59H110O6	TRUE	TRUE
TG 56:3|TG 18:1_18:1_20:1	930.843	7.708	[M+NH4]+	100	C59H108O6	TRUE	TRUE
TG 56:4|TG 18:1_20:1_18:2	928.827	7.47	[M+NH4]+	100	C59H106O6	TRUE	TRUE
TG 56:5|TG 18:1_18:2_20:2	926.813	7.242	[M+NH4]+	100	C59H104O6	TRUE	TRUE
TG 56:6|TG 16:0_18:1_22:5	924.794	6.974	[M+NH4]+	100	C59H102O6	TRUE	TRUE
TG 56:8|TG 16:0_18:2_22:6	920.764	6.536	[M+NH4]+	100	C59H98O6	TRUE	TRUE
TG 56:9|TG 16:1_18:2_22:6	918.752	6.208	[M+NH4]+	100	C59H96O6	TRUE	TRUE
TG 57:1|TG 16:0_23:0_18:1	948.887	8.387	[M+NH4]+	100	C60H114O6	TRUE	TRUE
TG 57:2|TG 16:0_23:0_18:2	946.875	8.138	[M+NH4]+	100	C60H112O6	TRUE	TRUE
TG 57:4|TG 18:1_21:1_18:2	942.842	7.618	[M+NH4]+	100	C60H108O6	TRUE	TRUE
TG 58:1|TG 16:0_24:0_18:1	967.85785,962.91156	8.51	[M+NH4]+,[M+Na]+	100	C61H116O6	TRUE	TRUE
TG 58:10|TG 18:2_18:2_22:6	944.76636,949.72321	6.264	[M+NH4]+,[M+Na]+	100	C61H116O6	TRUE	TRUE
TG 58:12|TG 18:2_18:4_22:6	940.74	5.685	[M+NH4]+	100	C61H94O6	TRUE	TRUE
TG 58:2|TG 16:0_18:1_24:1	960.89	8.254	[M+NH4]+	100	C61H114O6	TRUE	TRUE
TG 58:2|TG 22:0_18:1_18:1	965.846	8.257	[M+Na]+	100	C61H114O6	TRUE	TRUE
TG 58:3|TG 18:1_18:1_22:1	963.832	8.002	[M+Na]+	100	C61H112O6	TRUE	TRUE
TG 58:3|TG 22:0_18:1_18:2	958.878	8.004	[M+NH4]+	100	C61H112O6	TRUE	TRUE
TG 58:5|TG 18:0_18:1_22:4	954.847	7.545	[M+NH4]+	100	C61H108O6	TRUE	TRUE
TG 58:6|TG 18:1_18:1_22:4	952.826	7.29	[M+NH4]+	100	C61H106O6	TRUE	TRUE
TG 58:9|TG 18:1_18:2_22:6	946.78	6.605	[M+NH4]+	100	C61H100O6	TRUE	TRUE
TG 59:1|TG 16:0_25:0_18:1	976.925	8.645	[M+NH4]+	100	C62H118O6	TRUE	TRUE
TG 59:11|TG 16:0_21:5_22:6	956.769	6.279	[M+NH4]+	100	C62H98O6	TRUE	TRUE
TG 59:2|TG 23:0_18:1_18:1	974.908	8.415	[M+NH4]+	100	C62H116O6	TRUE	TRUE
TG 59:3|TG 23:0_18:1_18:2	972.893	8.173	[M+NH4]+	100	C62H114O6	TRUE	TRUE
TG 59:4|TG 18:1_23:1_18:2	970.873	7.916	[M+NH4]+	100	C62H112O6	TRUE	TRUE
TG 60:1|TG 18:0_24:0_18:1	990.938	8.763	[M+NH4]+	100	C63H120O6	TRUE	TRUE
TG 60:12|TG 16:0_22:6_22:6	968.766	6.274	[M+NH4]+	100	C63H98O6	TRUE	TRUE
TG 60:13|TG 18:2_20:5_22:6	966.75	5.845	[M+NH4]+	100	C63H96O6	TRUE	TRUE
TG 60:14|TG 18:3_20:5_22:6	964.739	5.572	[M+NH4]+	100	C63H94O6	TRUE	TRUE
TG 60:2|TG 24:0_18:1_18:1	988.922	8.537	[M+NH4]+	100	C63H118O6	TRUE	TRUE
TG 60:3|TG 24:0_18:1_18:2	986.905	8.299	[M+NH4]+	100	C63H116O6	TRUE	TRUE
TG 60:4|TG 18:1_24:1_18:2	984.889	8.05	[M+NH4]+	100	C63H114O6	TRUE	TRUE
TG 60:4|TG 24:0_18:2_18:2	989.845	8.053	[M+Na]+	100	C63H114O6	TRUE	TRUE
TG 60:6|TG 18:1_18:1_24:4	980.857	7.572	[M+NH4]+	100	C63H110O6	TRUE	TRUE
TG 61:3|TG 25:0_18:1_18:2	1000.92	8.453	[M+NH4]+	100	C64H118O6	TRUE	TRUE
TG 61:4|TG 25:0_18:2_18:2	998.905	8.199	[M+NH4]+	100	C64H116O6	TRUE	TRUE
TG 62:13|TG 18:1_22:6_22:6	994.78	6.33	[M+NH4]+	100	C65H100O6	TRUE	TRUE
TG 62:14|TG 18:2_22:6_22:6	992.765	5.994	[M+NH4]+	100	C65H98O6	TRUE	TRUE
TG 62:2|TG 26:0_18:1_18:1	1016.95221,1021.90369	8.781	[M+NH4]+,[M+Na]+	100	C65H122O6	TRUE	TRUE
TG 62:3|TG 18:1_18:1_26:1	1014.94	8.567	[M+NH4]+	100	C65H120O6	TRUE	TRUE
TG 62:3|TG 26:0_18:1_18:2	1019.89	8.575	[M+Na]+	100	C65H120O6	TRUE	TRUE
TG 62:4|TG 18:1_26:1_18:2	1012.92	8.312	[M+NH4]+	100	C65H118O6	TRUE	TRUE
TG 62:5|TG 26:1_18:2_18:2	1015.86	8.082	[M+Na]+	100	C65H116O6	TRUE	TRUE
TG 64:16|TG 20:4_22:6_22:6	1016.77	5.906	[M+NH4]+	100	C67H98O6	TRUE	TRUE
TG 66:2|TG 16:0_18:1_32:1	1077.97	9.206	[M+Na]+	100	C69H130O6	TRUE	TRUE
TG 66:3|TG 16:0_32:1_18:2	1075.95	9.027	[M+Na]+	100	C69H128O6	TRUE	TRUE
TG 67:3|TG 16:0_33:1_18:2	1089.98	9.132	[M+Na]+	100	C70H130O6	TRUE	TRUE
TG 68:3|TG 18:1_18:1_32:1	1099.0304,1103.97961	9.226	[M+NH4]+,[M+Na]+	100	C71H132O6	TRUE	TRUE
TG 68:4|TG 18:1_32:1_18:2	1097.0105,1101.96399	9.055	[M+NH4]+,[M+Na]+	100	C71H130O6	TRUE	TRUE
TG 69:3|TG 18:1_18:1_33:1	1113.04	9.323	[M+NH4]+	100	C72H134O6	TRUE	TRUE
TG 69:4|TG 18:1_33:1_18:2	1111.0354,1115.98438	9.155	[M+NH4]+,[M+Na]+	100	C72H132O6	TRUE	TRUE
TG 70:3|TG 18:1_18:1_34:1	1132.02	9.402	[M+Na]+	100	C73H136O6	TRUE	TRUE
TG 70:5|TG 34:1_18:2_18:2	1127.99	9.085	[M+Na]+	100	C73H132O6	TRUE	TRUE

## Sheet: Raw data of lipidomics
			Supplementary Table 5. Raw data of lipidomics.
Ctrl: mice fed ad libitum			BST: brainstem	HYT: hypothalamus
F-3h: mice subjected to 3 h of fasting			CBL: cerebellum	OB: olfactory bulb
F-6h: mice subjected to 6 h of fasting			COR: cerebral cortex	SC: spinal cord
F-12h: mice subjected to 12 h of fasting			HIP: hippocampus	QC: quality control
F-24h: mice subjected to 24 h of fasting
Ref: mice fed ad libitum for one day after subjected to 24 h of fasting
class				SC	SC	SC	SC	SC	SC	SC	SC	SC	SC	SC	SC	SC	SC	SC	SC	SC	SC	SC	SC	SC	SC	SC	BST	BST	BST	BST	BST	BST	BST	BST	BST	BST	BST	BST	BST	BST	BST	BST	BST	BST	BST	BST	BST	BST	BST
Sample Name	m/z	Rt/min	Adduct type	Ctrl-1	Ctrl-2	Ctrl-3	F-3h-1	F-3h-2	F-3h-3	F-3h-4	F-6h-1	F-6h-2	F-6h-3	F-6h-4	F-12h-1	F-12h-2	F-12h-3	F-12h-4	F-24h-1	F-24h-2	F-24h-3	F-24h-4	Ref-1	Ref-2	Ref-3	Ref-4	Ctrl-1	Ctrl-2	Ctrl-3	Ctrl-4	F-3h-1	F-3h-2	F-3h-3	F-3h-4	F-6h-1	F-6h-2	F-6h-3	F-6h-4	F-12h-1	F-12h-2	F-12h-3	F-12h-4	F-24h-1	F-24h-2	F-24h-3	F-24h-4	Ref-1	Ref-2	Ref-3
BMP 42:10|BMP 20:4_22:6	860.546	1.389	[M+NH4]+	6614	8845	7038	10770	12730	5820	7534	9802	9723	16690	10910	15310	11310	8043	14250	16770	5854	9413	8336	11360	15930	6620	10050	20960	8686	9212	15450	13420	9248	12230	17350	10370	12760	16550	11030	12210	8486	14830	15500	13500	11390	9652	14940	25090	21290	29350
BMP 44:12|BMP 22:6_22:6	884.542	1.311	[M+NH4]+	86870	110500	69280	115000	153700	70210	91470	101800	96830	133600	116400	153500	119300	90510	124000	107700	60120	119400	77800	138500	148700	87280	123000	246600	106500	96730	189500	147900	114500	141900	203000	134300	148600	180600	134500	131700	87450	175300	203800	136300	139400	97580	187200	289900	256300	376400
CAR 14:0	372.311	1.044	[M+H]+	58560	56320	55260	85770	67310	56940	80790	49330	56270	67590	55120	99280	92300	73130	61510	69230	54960	77880	69960	69700	66290	48750	69230	75120	63560	47910	62790	79610	54490	53330	74280	55860	65570	58510	54580	81240	74160	75060	94100	45570	104600	90770	80010	90130	79060	84680
CAR 16:0	400.343	1.127	[M+H]+	174600	179700	205800	273400	239600	171600	218400	214800	202500	252900	187700	315300	270100	269200	230600	183100	173300	255500	204600	265700	265800	214100	203300	375400	180900	267300	260800	287900	273400	268700	367800	287800	278600	255600	223900	345900	316100	356200	389700	214400	414600	298200	318200	392100	331700	349700
CAR 16:1	398.325	1.069	[M+H]+	23020	21840	27010	35540	31280	23990	34460	30810	26900	39750	26080	43020	33700	33770	34070	24400	25420	34920	31760	27740	30660	24270	25230	41350	21640	31150	33010	33290	33760	35510	38010	32820	38880	35150	29360	42310	38440	38130	40670	22420	44820	34850	36380	44670	42820	43490
CAR 18:1	426.358	1.149	[M+H]+	146400	152700	186600	256000	224300	159600	178100	204100	188900	236800	173800	262100	236600	236200	198700	157600	154600	209600	172700	225600	227700	202100	175700	312500	145200	207200	226500	239700	231000	241500	272700	230600	246900	232100	184000	273000	260100	281000	306300	154700	310500	226300	254900	315400	281000	299500
CAR 18:2	424.341	1.084	[M+H]+	9654	13750	15470	20760	22070	13480	21570	20730	22100	28210	17400	49180	26550	27550	29420	26450	22780	34720	31790	18340	17730	17040	13370	27530	11550	24910	30030	24550	20340	22790	34400	26220	32280	35420	24460	40810	30100	41230	35310	31580	43500	37600	42570	36450	46990	34530
CAR 20:1	454.39	1.264	[M+H]+	13430	15100	17470	24150	21180	11590	13470	18240	25510	24730	18170	27330	20260	22000	20300	21470	13750	26430	16240	26380	25140	18760	16940	38220	13660	18350	27010	25640	16700	18190	36720	17910	25170	23740	19700	25350	21840	36860	31290	21330	28030	22340	39930	33920	28090	36220
CAR 20:4	448.341	1.081	[M+H]+	29180	32310	31550	40240	54020	30700	39020	34360	46440	47330	37740	47520	42070	38590	39400	24640	29180	44630	28760	39080	52280	34420	32910	66310	37740	36380	53050	53780	36930	46960	62730	43880	50800	50120	46090	54330	39570	57270	56340	39530	49210	40190	71230	62650	50960	90610
CE 16:0	642.618	7.266	[M+NH4]+	0	0	0	0	0	0	0	0	0	0	0	0	0	0	0	0	0	0	0	0	0	0	0	0	0	0	0	0	0	0	0	0	0	0	0	0	0	0	0	0	0	0	0	0	0	0
CE 18:1	668.632	7.302	[M+NH4]+	52.47	314	0	165	62.46	54.88	216	244.5	117.3	246	192.4	202.1	132.4	372.7	50.19	0	0	0	270.6	205.3	459.4	0	0	147.7	278	273.7	54.47	397.8	53.25	211.2	312	224.5	110.3	155.9	203.1	91.44	212.3	198.8	0	0	0	239.2	109.2	48.72	157.5	416.9
CE 18:2	666.616	6.95	[M+NH4]+	1799	1912	1195	1462	1239	624.9	1245	482.2	1830	1996	1093	785.6	967.8	1371	1150	1035	437.5	1236	1376	988.1	7704	2107	2024	2013	802.9	556.6	878	912.9	1293	811.8	1657	593.8	751	579	1173	1396	0	1359	1510	984.2	1003	1299	1751	2205	3868	2275
CE 18:3	664.597	6.598	[M+NH4]+	3207	2458	3858	2422	3029	2470	2098	639.4	4421	653.8	3241	3530	1999	3805	1938	1255	2139	3746	2204	3324	1433	5170	1086	1762	1221	1718	884.4	2068	1569	1956	1026	1134	4656	1749	2302	1135	1318	881.7	2471	1640	1412	2520	1151	2652	3049	1358
CE 20:3	692.628	6.989	[M+NH4]+	51.73	0	105.4	0	81.99	0	0	0	51.21	64.99	178.9	50.28	54.7	69.45	220.4	95.54	52.77	151.7	71.09	0	119.3	54.94	0	77.75	53.54	53.83	53.31	54.79	0	0	55.8	50.58	193.2	53.08	193.4	0	0	123.6	159.2	0	104.8	54.87	0	103.4	53.45	209.1
CE 20:4	690.613	6.68	[M+NH4]+	1047	1149	676.4	3273	1868	1436	698	1552	6259	2961	1225	1935	1519	1928	2603	521.4	351.4	1513	2614	1977	11870	3109	1474	3592	1673	1822	1749	717.9	500.5	2197	1901	1433	4457	1430	2782	1921	294.3	2439	2248	1431	380.8	1118	4835	2566	7277	7179
CE 20:5	688.597	6.331	[M+NH4]+	2401	225.9	1008	825.4	866.1	362.7	1445	271.9	2769	525.5	456.6	1134	1432	1126	1322	1037	922.2	293.4	887.7	930.4	888	547.1	615.1	957	1291	472.7	375.3	1319	975.3	1049	822	1027	700.9	1031	344.4	1657	1014	659.3	1012	790.4	465.2	1573	289.8	759.1	447.5	779.4
CE 22:4	718.644	7.046	[M+NH4]+	0	0	0	0	0	0	0	0	0	0	0	0	0	0	0	0	0	0	0	0	0	0	0	0	0	0	0	0	0	0	0	0	0	0	0	0	0	0	0	0	0	0	0	0	0	0
CE 22:5	716.629	6.719	[M+NH4]+	0	0	0	0	0	0	0	0	0	0	0	0	0	0	0	0	0	0	46.75	0	0	0	0	0	0	0	0	0	0	0	0	0	0	0	0	1414	0	0	0	0	0	0	864.7	0	0	980.4
CE 22:6	714.614	6.449	[M+NH4]+	2290	1216	2218	3719	3614	2127	3604	2004	4017	1941	1665	5924	5225	2347	2666	2324	2795	3629	5710	2637	5751	2629	2522	4052	2040	759	2600	2114	2262	3212	9623	1848	4248	1731	4635	11050	1232	4559	4366	3261	4010	3385	9438	4532	6535	14910
CE 24:4	746.681	7.427	[M+NH4]+	0	0	0	0	0	0	0	0	0	0	0	0	0	0	0	0	0	0	0	0	0	0	0	0	0	0	0	0	0	0	0	0	0	0	0	0	0	0	0	0	0	0	0	0	0	0
CE 24:5	744.663	7.117	[M+NH4]+	0	0	0	0	0	0	0	0	0	0	0	0	0	0	0	0	0	0	0	0	0	0	0	0	0	0	0	0	0	0	0	0	0	0	0	0	0	0	0	0	0	0	0	0	0	0
CE 24:6	742.651	6.796	[M+NH4]+	0	0	0	0	0	0	0	0	0	0	0	0	0	0	0	0	0	0	0	0	0	0	0	0	0	0	0	0	0	0	0	0	0	0	0	0	0	0	0	0	0	0	0	0	0	0
Cer 30:1;2O|Cer 18:1;2O/12:0-1	464.443	2.191	[M+H-H2O]+	11450	9879	13600	10060	12720	8356	11810	17910	17000	11550	10740	11380	11010	10220	12290	10380	6750	8697	8051	12210	13980	11000	11960	13290	10720	14780	14650	9451	10220	13270	15230	11420	10460	13030	10930	11830	12470	13680	12160	11540	9446	11040	11780	13490	14850	18890
Cer 30:1;2O|Cer 18:1;2O/12:0-2	482.455	2.19	[M+H]+	3546	5822	5994	3993	5291	3906	4980	7572	8062	4460	6669	3126	4158	4099	4414	4495	2892	3972	2941	4231	6393	5256	2888	4819	4744	6195	5486	4582	6342	5273	5312	5006	4208	5936	4103	3249	5019	5113	7943	5449	4256	2823	4805	6130	7313	9208
Cer 36:0;2O|Cer 18:0;2O/18:0	568.563	3.816	[M+H]+	15650	19590	21320	25480	22600	26640	26360	27640	22870	23420	29100	20670	21950	19610	19780	22850	26340	19980	17740	24120	20210	43770	19350	15090	14910	11870	16680	23840	16800	20200	25380	19090	16490	17470	20130	15900	13820	16600	16740	16110	13720	12040	15620	19150	23190	24840
Cer 36:1;2O|Cer 18:1;2O/18:0-1	548.537	3.675	[M+H-H2O]+	111500	121700	119400	136100	160900	150400	163200	161800	190200	138600	148500	146200	146300	146500	151000	134200	144000	149400	131500	125500	124600	150300	125100	119500	148600	121500	157700	189300	151800	152000	213400	156600	166400	172900	183400	160600	132500	167200	137700	169800	137400	147400	178800	133800	160100	184000
Cer 36:1;2O|Cer 18:1;2O/18:0-2	566.549	3.674	[M+H]+	75730	86190	71300	92260	99160	98750	97260	122600	122400	96120	105300	97960	82850	89600	87880	90980	107600	97380	81730	78030	83190	92930	88710	71890	109000	78160	101300	129100	87130	101600	115500	93980	97140	117000	109400	116300	92310	107900	92310	124900	86540	86890	111800	85140	105400	122200
Cer 36:2;2O|Cer 18:2;2O/18:0-1	546.522	3.194	[M+H-H2O]+	6604	9815	7748	12040	15230	8969	6832	17430	23110	15150	11580	17140	14300	14810	14190	12020	9578	19440	10830	9267	12690	12580	10800	12860	12220	14110	15190	28960	11860	16150	10180	11980	15700	16620	15760	24730	13070	14870	13900	22450	14430	13440	20800	14890	15900	24570
Cer 36:2;2O|Cer 18:2;2O/18:0	564.533	3.192	[M+H]+	4974	7712	5348	9373	10960	9083	5685	14770	14860	10960	9037	10360	8991	11030	10270	8628	12580	9672	10370	8096	9401	5547	6715	9081	13540	13340	9977	25730	6877	9004	8417	11110	9966	11830	12880	14010	8926	10510	11730	16010	13100	10240	15780	9953	10170	17770
Cer 37:1;2O|Cer 18:1;2O/19:0-1	562.552	3.954	[M+H-H2O]+	5291	4752	3202	3856	5030	3976	5452	5335	5044	4485	4212	5075	4200	3558	4508	3028	3446	4628	3487	3710	4361	4068	3926	4134	2948	2837	4215	4473	3957	4705	9019	4431	4405	5283	3750	4734	3429	5569	3673	4682	3400	3514	3828	4893	3868	6747
Cer 37:1;2O|Cer 18:1;2O/19:0-2	580.564	3.952	[M+H]+	9300	6962	6992	13760	11040	11830	7588	15650	12880	11570	8587	10290	9927	11470	8045	9919	8434	9050	7770	10550	11430	9907	9843	11310	9794	7332	8067	11340	11700	9560	11180	10620	10660	12820	7222	10610	9932	10660	10130	10220	9169	8517	10970	9315	11750	10430
Cer 37:3;3O|Cer 18:1;2O/19:2;O	574.513	3.375	[M+H-H2O]+	17900	26580	22350	19340	18050	25350	20920	34680	36180	18340	20250	16540	16200	23300	22810	24940	30160	20560	19640	17150	21110	17130	19750	10650	24790	32970	17770	23440	20950	19430	20520	20620	19770	15320	24840	20990	27190	19200	15470	29020	18320	27310	18310	15840	17230	11930
Cer 38:1;2O|Cer 18:1;2O/20:0-1	576.571	4.233	[M+H-H2O]+	67700	66820	60740	76510	100500	67070	77860	98330	97990	85650	92390	89780	79720	80010	83230	65520	68620	78950	69210	74490	83450	89940	69660	79700	71980	59600	82700	87710	86300	86510	109000	89180	92440	103000	85990	76120	65640	80820	84010	96290	87860	70880	82910	106400	108700	96490
Cer 38:1;2O|Cer 18:1;2O/20:0-2	594.58	4.232	[M+H]+	39620	47930	38110	47090	60410	42940	46530	66110	62340	54700	50850	56690	50420	44020	50980	43150	44730	49620	43260	47710	51450	53830	47750	52520	49690	41810	56690	64760	49770	59300	78080	55090	61960	61150	59520	53920	43390	65600	55530	65390	52460	44360	52590	69630	72030	62450
Cer 38:2;2O|Cer 18:2;2O/20:0-1	574.552	3.771	[M+H-H2O]+	4560	4203	4414	7567	8605	3883	3374	7732	9667	7480	5507	8496	8128	5827	7190	4957	5394	8665	5648	6252	7876	5700	6509	8522	6694	4914	7859	11550	6402	7418	6152	6108	8973	10030	9361	7448	4152	9471	8671	9740	7914	6245	13410	9311	8967	10970
Cer 38:7;4O	596.468	1.784	[M+H-H2O]+	12080	10430	8377	17720	9404	9795	23890	2837	2318	14950	9700	20550	15570	17110	10850	11080	10630	12800	11640	15430	11740	11370	16660	41450	15590	29430	27000	13000	22800	17000	46710	23460	19100	17020	21230	25320	24980	21860	17150	12450	29300	23200	22680	25420	23990	27220
Cer 39:1;2O|Cer 18:1;2O/21:0-1	590.588	4.546	[M+H-H2O]+	4376	5667	5621	6939	7340	4854	6166	7831	5787	6294	7618	8986	5863	5847	6890	5953	4749	4436	5111	5110	5972	7892	6656	8112	4601	3196	5744	9060	6399	6045	8973	6665	7980	8710	6822	6116	4923	6007	7100	7285	8564	4141	5313	11010	8946	9982
Cer 39:1;2O|Cer 18:1;2O/21:0-2	608.598	4.55	[M+H]+	2733	4168	4411	5066	6130	3558	4257	5684	4552	5330	4206	6412	5550	5110	2481	5040	2862	5420	4061	5433	4797	5852	3884	5614	3774	2665	4408	7695	5088	4774	5068	5112	4771	6823	3534	3920	4763	7083	4174	3848	6325	3194	5276	7938	7100	8339
Cer 40:1;2O|Cer 18:1;2O/22:0	604.599	4.818	[M+H-H2O]+	75250	71240	95660	115000	83390	103900	92580	84030	71480	99000	109300	72090	89020	76710	65510	79230	80500	97420	79050	89280	76130	181600	67350	31140	28360	18680	23320	41810	34690	39100	35870	38110	28260	31940	34540	23770	27610	32930	33020	22960	39400	22810	25140	39050	37930	32540
Cer 40:2;2O|Cer 18:2;2O/22:0	602.584	4.368	[M+H-H2O]+	21460	15280	27240	27270	23040	24440	25950	18820	22390	25170	27060	23470	22700	21790	17800	24230	22910	26990	20950	22330	21490	44270	16160	10480	7018	5872	7644	12530	7132	9614	15420	8597	9326	8524	10360	8406	9314	11170	10890	6877	9208	9176	10020	12790	8554	12890
Cer 40:3;2O|Cer 18:1;2O/22:2	600.57	3.744	[M+H-H2O]+	6824	7220	7257	7090	8653	7500	5729	11030	9989	5568	4827	8396	8504	7821	7711	7893	8404	6066	6639	7538	6896	7505	5091	5498	6140	8096	9020	7614	4974	7764	5114	7931	7953	9775	7529	11840	8969	7206	7115	7909	8378	6006	7226	7127	10050	6388
Cer 40:7;4O|Cer 20:2;3O/20:5;(2OH)	624.498	2.075	[M+H-H2O]+	137900	127600	120300	144500	147100	110900	199000	46830	52520	144700	127400	141900	129800	140600	115300	115500	93450	141400	113500	157800	132600	146300	118300	246900	137100	206000	156600	134400	190700	141800	266300	152100	165900	138000	155000	183500	172300	165100	195700	106400	191000	164100	161300	184000	190000	212200
Cer 41:0;4O|Cer 17:0;3O/24:0;(2OH)	652.631	4.247	[M+H-H2O]+	17950	17900	16760	17980	20780	18350	21790	28500	28550	18350	19480	19340	20550	19850	18570	21110	22590	16770	18560	17910	17230	20250	17820	20240	23090	18290	25360	20380	21340	25290	32550	23140	26870	27280	24630	22440	22160	23440	21540	25800	20800	19710	23230	28720	26050	22050
Cer 41:1;2O|Cer 18:1;2O/23:0-1	618.616	5.095	[M+H-H2O]+	19280	18220	24830	26770	25980	23330	22410	24700	21060	26350	25320	20140	22110	19810	15940	24630	21080	23980	19740	22490	17520	34600	19670	15460	12330	7997	9991	16530	13850	15220	16120	13690	12580	13090	13890	11170	12580	15320	13950	12420	19610	8372	14520	15070	15170	15320
Cer 41:1;2O|Cer 18:1;2O/23:0-2	636.624	5.098	[M+H]+	10820	11660	13800	17670	18000	16600	14890	15190	11920	14900	14830	16380	11500	13550	10630	13210	11800	13880	12750	16600	12260	23240	13380	11620	7258	5031	6314	12230	9285	9934	8547	8020	8062	8867	9013	7788	8318	9436	9979	8515	13100	7001	9016	11490	9153	10080
Cer 41:2;2O|Cer 17:1;2O/24:1	616.602	4.569	[M+H-H2O]+	7159	5561	8176	11650	9541	7356	12370	8612	8901	10030	9290	11010	7888	10290	7229	8471	6608	11730	6352	9933	9134	12990	8922	9960	5723	4075	7108	9460	7414	7674	12260	6371	9068	7952	5869	6537	5846	8361	8797	4601	6932	4982	6574	9583	10180	13890
Cer 42:1;2O|Cer 18:1;2O/24:0-1	632.63	5.36	[M+H-H2O]+	36630	32600	48360	77760	46050	71230	42630	42160	39230	47610	51550	35970	44620	40560	30700	36660	46130	48570	39860	41730	39180	94680	43320	46330	20230	9870	12640	38200	26500	19780	17550	50760	14830	14860	17370	16570	22840	21380	19740	12240	27310	13150	19970	17130	17240	22460
Cer 42:1;2O|Cer 18:1;2O/24:0-2	650.641	5.361	[M+H]+	21940	20370	29030	46980	26650	37530	26130	28400	27010	29960	32840	27050	28500	26470	20130	25870	30260	28370	24570	27120	22290	62010	25740	21010	10090	7236	7812	17630	16710	14850	11430	25410	9130	9151	10940	10120	12380	13960	11750	9276	14650	7115	10180	11300	11440	11680
Cer 42:2;2O|Cer 18:1;2O/24:1	630.616	4.803	[M+H-H2O]+	350900	309800	421200	593300	406100	521800	379200	358100	325400	450900	444200	365800	405800	359400	285900	381600	340100	495000	349400	424100	380800	797100	314200	289100	148900	104600	156100	298300	185400	215400	218000	253400	158800	185100	182600	146200	154500	237900	228200	134900	219800	162700	179000	202100	205000	244400
Cer 42:3;2O|Cer 18:2;2O/24:1	628.598	4.344	[M+H-H2O]+	51840	58410	62070	53360	52890	81830	66410	82230	121700	57920	54040	50240	58330	70090	56730	61590	70120	61860	48390	48740	53060	57120	60210	52560	65350	73100	57370	72690	62170	88230	67360	80990	73850	70970	71080	85820	95950	85250	69240	73430	73540	92840	76850	67100	73440	74080
Cer 43:1;2O|Cer 18:1;2O/25:0-2	664.656	5.599	[M+H]+	0	0	0	0	0	0	0	0	0	0	0	0	0	0	0	0	0	0	0	0	0	0	0	0	0	0	0	0	0	0	0	0	0	0	0	0	0	0	0	0	0	0	0	0	0	0
Cer 43:1;3O|Cer 18:1;2O/25:0;O	662.642	5.065	[M+H-H2O]+	2183	2558	2795	4464	4057	2974	3700	2951	3220	3979	3149	3786	3077	2595	1340	2897	1956	2860	1411	4367	4112	5724	2404	3977	1534	1815	1621	2665	3230	3765	2548	2579	2264	2304	2271	2609	1999	3624	2594	2531	3378	1848	2338	3555	2863	3731
Cer 43:2;3O|Cer 18:1;2O/25:1;O	660.626	4.433	[M+H-H2O]+	6490	7150	9207	7587	5451	9630	8170	12150	14210	5404	6754	5959	7297	5993	8586	8035	8890	5169	6266	4880	5002	6051	6107	5969	9139	6327	4747	7577	8484	9584	9543	9752	13050	9549	8047	14740	9954	10590	8900	11330	8755	7779	5980	9664	10210	5630
Cer 44:1;3O|Cer 20:1;2O/24:0;O	694.68	5.104	[M+H]+	12490	11170	15210	16210	14480	17960	14610	15250	15670	16190	14610	13790	14380	12060	11770	13820	13650	12760	13480	14580	12590	18850	14290	11460	10160	6695	8431	10890	11950	11290	10810	11810	9573	9071	11490	12780	11060	10550	10140	11160	14340	9131	9846	13650	12900	9686
Cer 45:1;3O|Cer 20:1;2O/25:0;O	708.694	5.361	[M+H]+	14460	12210	19210	20010	19300	17600	15830	13100	10040	18510	19140	17830	15540	15330	13110	14210	14650	17020	16030	18230	15060	37940	16400	7606	7506	3592	4414	9294	9662	9888	6746	6457	5306	4651	6210	5590	6630	9929	6970	2797	9487	3666	5407	7870	7943	9033
Cer 45:2;3O|Cer 18:1;2O/27:1;O	706.678	4.801	[M+H]+	134700	123200	209300	202600	162500	165600	160200	128400	118200	178300	173300	158900	177700	146700	108300	170000	145100	181800	158700	163100	139800	303400	158300	72870	53580	44700	56750	92070	77770	86840	83460	51440	60970	68220	70970	64710	59140	100500	87210	47380	76660	53150	73430	71610	65550	92980
Cer 50:2;3O|Cer 18:1;2O/32:1;O	758.737	6.336	[M+H-H2O]+	0	0	0	0	0	0	0	0	0	0	0	0	0	0	0	0	0	0	0	0	0	0	0	0	0	0	0	0	0	0	0	0	0	0	0	0	0	0	0	0	0	0	0	0	0	0
CL 68:4|CL 16:1_18:1_16:1_18:1	1399.96	5.952	[M-H]-	16530	16940	13970	16690	18730	13390	21580	0	0	19610	18390	19690	17270	17220	18700	13530	11950	16850	14880	14980	21240	17190	18400	19990	17990	12620	21300	19230	16980	21980	25050	22620	19950	24820	21170	20280	14580	20400	18380	20410	18030	13190	19740	21340	22170	33920
CL 70:4|CL 16:1_18:1_18:1_18:1-1	713.49	6.252	[M-2H]2-	157600	153900	126400	156500	150600	231700	173700	3748	888.1	139800	198900	142600	159200	161900	133500	238300	131100	249400	150000	123900	157800	153300	152900	148100	172800	121300	179500	156200	168400	190000	194500	192400	268700	203600	203300	172100	147100	176800	165100	177600	171000	122300	167800	273500	181500	167600
CL 72:4|CL 18:1_18:1_18:1_18:1-1	727.504	6.544	[M-2H]2-	369300	402300	319000	371600	362000	335000	381400	66390	11760	380000	403700	372800	345000	347500	393700	358500	289400	358900	354600	357400	357100	330100	395200	329600	445300	372800	482600	423400	409700	495000	481800	549300	446800	509000	516800	433000	396700	467900	468800	496300	442400	384900	417100	437400	460600	429300
CL 72:5|CL 18:1_18:1_18:1_18:2-1	726.5	6.303	[M-2H]2-	174800	195200	153300	202700	208600	168600	197300	73120	366.7	207100	207500	216300	190200	200300	223900	239900	169500	210300	203300	204900	240700	197400	229600	206700	243700	168300	254800	253000	227100	275000	261000	303300	265700	285400	277300	235100	203800	278500	257400	290700	262600	213000	280800	309200	286300	335800
CL 72:7|CL 18:1_18:2_18:2_18:2-2	724.481	5.77	[M-2H]2-	145000	156100	131800	158800	186200	142800	3105	578.7	377.4	195500	175200	190500	168600	156300	192600	125900	127200	180900	145000	177000	214100	151700	185900	259400	205100	167500	222900	200500	201200	219800	236600	226500	213400	243200	226600	220800	185600	230400	218700	221400	231100	178700	217200	264800	271000	300800
CL 74:11|CL 36:5_38:6	1469.94	5.489	[M-H]-	6937	8629	7402	9788	10290	6314	11600	0	0	12340	9364	11520	8886	8426	13860	6333	6482	9482	6698	8785	15400	9433	10840	15970	10250	8558	12790	11730	10820	11500	16800	11470	13100	14410	12080	13070	9306	11590	11930	12240	12790	9333	12490	19630	18620	29060
CL 74:9|CL 18:1_18:2_18:2_20:4-2	736.482	5.801	[M-2H]2-	153800	171600	143600	174700	190600	142100	178500	4621	6378	192300	181400	197900	174300	168400	185800	135900	133600	178600	153800	179700	216400	170800	188200	230300	193700	161500	228700	199000	198900	217000	245900	230700	225200	237900	219700	212400	176300	228200	230500	219700	226200	175300	219200	294100	281200	340700
CL 76:9|CL 18:1_18:1_18:1_22:6-1	750.496	6.132	[M-2H]2-	273900	314500	253500	279300	285100	222000	278400	2736	0	282200	309500	334500	252500	298400	306500	244100	211500	294000	261000	275100	330100	240700	301900	446000	365700	331200	441500	413700	401500	404500	415700	485800	438600	418400	421800	402100	355700	418900	452700	410800	437800	340100	401500	542700	543900	594400
CL 78:12|CL 18:1_18:1_20:4_22:6-1	761.487	5.84	[M-2H]2-	226300	258600	221300	274500	289400	199200	231200	6675	7776	262200	266600	297800	249700	253700	253000	195200	169000	243000	219800	263700	298600	227800	259900	408700	292500	272000	382700	355300	333100	339900	347200	368400	375600	378400	335100	343600	276800	342800	376400	347500	370200	270700	343100	513000	488400	544700
CL 78:13|CL 18:1_18:2_20:4_22:6-1	760.481	5.595	[M-2H]2-	186900	211100	181300	224300	231500	180000	196200	6755	6547	219400	215800	224000	205800	200400	193700	166100	141200	205200	181100	232300	239500	187900	212700	285800	217500	195300	257500	231700	239200	245100	284100	264500	265300	257500	241700	233000	199600	254900	279200	240200	259900	204400	235200	359400	318400	351200
CL 78:14|CL 16:1_18:1_22:6_22:6-1	759.471	5.365	[M-2H]2-	68060	74370	67250	72830	75840	61700	77430	1872	8712	83690	81650	77280	71290	75220	76490	65470	55000	67110	68000	85550	91270	78230	79410	95580	77530	64650	92590	65490	83060	86400	104000	89880	92710	102600	83400	83890	62060	91410	94890	87020	95090	69770	84820	125400	115900	135700
CL 80:14|CL 18:1_18:1_22:6_22:6-1	773.488	5.686	[M-2H]2-	241500	275100	242300	294600	295600	222200	241100	10220	13040	276400	275500	292200	257100	251200	256400	241000	175400	255400	229000	298400	293100	240500	271100	395000	293500	263000	367700	325000	325400	324600	355800	362600	361400	350300	325500	304600	274300	343000	387200	321400	350600	275500	324900	482300	437700	485400
CL 80:15|CL 18:1_20:4_20:4_22:6-1	772.484	5.507	[M-2H]2-	103800	124300	107600	133800	138600	98950	117100	14270	14340	128800	127400	140400	119300	115100	122300	137400	88820	118900	102500	141200	144600	121100	124800	190500	136100	121000	170500	153300	151200	153600	175100	168500	175000	170900	151500	152700	125800	160300	172200	160900	168200	131300	158100	236500	221600	258700
CL 82:17|CL 18:1_20:4_22:6_22:6-1	784.48	5.37	[M-2H]2-	120200	118500	112000	121300	121200	97490	118800	4329	14810	123100	117900	126200	109800	111300	112500	67720	84500	107100	103200	121200	126200	106900	118900	157600	124000	114800	153200	132000	135700	137900	150800	149400	155000	155600	133400	130500	112600	142800	153300	139600	147900	109300	132700	200900	188800	200300
CL 84:19|CL 18:1_22:6_22:6_22:6	796.483	5.206	[M-2H]2-	120500	117800	79720	124000	168900	85970	117600	23100	12500	109700	92930	123100	89820	86150	93790	178900	66080	120000	83840	171000	121100	95260	82630	188000	118100	94240	148400	119600	128600	156600	233100	149300	161300	149500	112400	95590	114000	107900	131700	136600	133900	127400	157300	306200	158100	253200
DG 27:5	511.348	1.219	[M+Na]+	16730	19470	37550	20720	22220	42100	21980	36120	26320	22580	48350	75200	17380	19520	50860	189900	14340	22660	17580	39170	29370	33480	40630	20640	12990	15310	19830	15310	14180	18400	24440	14020	15400	14900	19540	42030	17230	19910	21020	14840	19230	15310	18730	30060	31070	29680
DG 30:0|DG 14:0_16:0	558.509	3.426	[M+NH4]+	216.1	936.2	705.8	773.6	858.7	1041	1033	2176	1378	1301	1635	427.2	1348	0	448.6	1117	1052	566.3	888.7	1143	2067	716.2	812	710	2037	889	1175	1415	1024	1452	1589	251.1	503.4	881.7	710.8	1710	913.3	1732	1464	2609	510.4	828.6	1079	1265	445.8	960.5
DG 30:1|DG 14:0_16:1	556.487	2.958	[M+NH4]+	0	0	0	0	0	0	0	0	0	0	0	0	0	911.3	0	0	0	0	0	1114	0	0	0	0	0	0	0	0	0	0	0	0	0	0	0	0	0	0	0	0	0	0	0	0	0	0
DG 30:8	547.342	0.956	[M+Na]+	91030	97280	109900	99060	101800	93920	92610	92020	94020	108900	118200	138500	95200	93280	116100	205200	80410	103400	93660	95610	105000	97800	93470	105500	88850	94240	92950	88900	86140	87980	92350	88000	83700	93760	95230	109500	87290	99380	95880	78910	98080	83760	99920	93360	92740	102900
DG 32:0|DG 16:0_16:0	586.538	3.988	[M+NH4]+	27360	25900	17660	38650	53530	21830	30860	45560	60490	40400	37170	41960	33020	34820	30280	28980	25260	42590	22940	35470	51960	30870	37310	60410	46860	35410	62390	62050	40400	47800	77540	41830	50030	54520	44210	54870	33360	64680	62300	50880	40190	44500	60270	53180	64740	76970
DG 32:1|DG 16:0_16:1	584.521	3.517	[M+NH4]+	1533	711.6	793.7	774.2	1925	1695	2797	1483	3780	2032	290.2	1539	655.9	1284	692.4	1166	3490	2075	765.8	2071	1484	2027	1933	1464	3882	1903	2008	3020	788.4	2152	6600	1386	1823	1874	1773	2182	2991	967.9	2989	915.1	3086	966.4	4039	2950	1857	2812
DG 32:2|DG 14:0_18:2	582.508	3.049	[M+NH4]+	0	0	0	0	0	0	0	0	0	0	0	0	0	0	0	0	0	0	0	0	0	0	0	0	0	0	0	0	0	0	0	0	0	0	0	0	0	0	0	0	0	0	0	0	0	0
DG 33:1|DG 15:0_18:1	598.535	3.8	[M+NH4]+	11490	11760	12100	13610	15180	11160	10110	16690	15120	14470	13430	16130	14000	12540	12610	13170	13950	16390	13160	14730	13540	15480	15310	12210	11230	13780	13420	13220	12450	14960	15800	11980	9950	13120	11930	13260	13260	15700	12970	10390	12560	12830	15900	11090	11230	13130
DG 33:2|DG 15:0_18:2	596.52	3.348	[M+NH4]+	17160	18360	19150	21540	18600	24470	16210	22440	18120	20030	20790	17360	20900	19470	17930	22270	18520	22920	21160	21140	18900	32800	19360	13560	15260	12350	10020	13840	13020	14520	11720	12970	11120	11740	10530	12260	16570	16620	16190	9638	13010	15950	13970	10640	8046	10410
DG 34:0|DG 16:0_18:0	614.569	4.551	[M+NH4]+	28400	28910	26420	49820	60360	19020	29630	48050	67440	56280	47110	47650	38940	39100	36690	32810	23820	52340	26330	48460	62510	34410	40530	69310	46350	33110	65310	95960	50250	64610	91340	46430	62260	79350	47150	48410	33890	83140	62620	47750	42920	39310	53020	73860	89540	85540
DG 34:1|DG 16:0_18:1	612.553	4.072	[M+NH4]+	246200	268900	240300	406700	468000	246700	317700	530000	698900	441100	348700	489100	361700	426500	369200	417300	328500	605100	306100	431600	498000	414900	384700	603500	474400	396300	633500	687900	422700	485100	904400	357900	464000	604900	463500	524200	465800	740400	714500	562500	488400	508400	842400	554400	629800	865600
DG 34:2|DG 16:0_18:2	610.538	3.636	[M+NH4]+	3268	1929	2621	4285	7130	2676	6384	5376	11520	5756	1560	8265	3676	4798	4011	6041	5305	9073	6333	5990	10170	3524	5292	7167	6344	5056	11110	13100	3428	6470	23400	7461	5599	6262	4915	9661	8047	11940	6553	9224	8388	7609	16690	8495	4068	11460
DG 34:3|DG 16:1_18:2	608.523	3.192	[M+NH4]+	0	0	0	0	0	0	0	0	0	0	0	0	0	0	0	0	0	0	0	0	0	0	0	0	0	0	0	0	0	0	0	0	0	0	0	0	0	0	0	0	0	0	0	0	0	0
DG 34:4|DG 16:2_18:2	606.508	2.785	[M+NH4]+	0	0	0	0	0	0	0	0	0	0	0	0	0	0	0	0	0	0	0	0	0	0	0	0	0	0	0	0	0	0	0	0	0	0	0	0	0	0	0	0	0	0	0	0	0	0
DG 35:1|DG 17:0_18:1	626.568	4.359	[M+NH4]+	4033	5237	6536	8096	9247	4164	6137	9465	10320	10440	5902	11660	7357	8089	5386	7178	3916	12640	5919	11120	11180	8993	7302	12540	6253	6131	10470	10700	7312	9050	17380	5465	7216	11160	6301	7424	8225	14040	12970	5645	6936	8661	11320	12520	12030	13860
DG 35:2|DG 17:0_18:2	624.554	3.904	[M+NH4]+	12710	14080	13390	16620	14410	14630	13240	18250	17380	18670	15940	17170	16510	16520	11440	16550	15140	21290	15030	17820	15650	20810	16510	15000	11030	12490	14910	17480	13780	14050	15430	12570	13840	13200	11740	13530	13850	19270	17350	11440	13770	13380	16940	15150	13630	14250
DG 35:3|DG 17:1_18:2	622.536	3.442	[M+NH4]+	0	806.1	701	0	0	1544	0	3649	0	0	0	0	920.6	0	0	0	0	3963	1352	0	864.6	838.3	0	0	0	0	0	902.6	0	954.9	1453	0	0	0	0	0	0	3359	0	0	0	1156	0	0	0	0
DG 36:0|DG 16:0_20:0	642.598	5.08	[M+NH4]+	6357	6644	6261	8479	12040	4466	5791	10530	12370	11680	8456	11370	9331	8065	8060	7204	5629	11930	6436	10930	13960	10600	10350	15390	8489	6419	13660	12030	10320	11040	15350	6965	8795	11330	8619	11090	7675	15350	14660	7248	8866	7747	11120	13050	15210	16190
DG 36:1|DG 18:0_18:1	640.586	4.636	[M+NH4]+	352700	381100	380600	748300	742000	242900	398800	705500	1061000	794100	542100	913400	582300	684400	519200	667900	388600	1041000	440700	852200	957700	664000	633200	1193000	643100	523000	1016000	1588000	656600	945200	1559000	567400	750200	1076000	586600	809300	707900	1419000	1108000	760200	778200	692600	1051000	1296000	1550000	1636000
DG 36:2|DG 18:1_18:1	638.57	4.155	[M+NH4]+	80800	83140	118900	126300	172500	116200	104000	198800	264300	125700	133300	194400	129000	149100	130700	185400	136100	239300	124500	143800	172100	156700	143100	162300	173900	157700	217900	216700	119800	143100	293900	117800	163600	201400	117000	191400	197100	217900	200900	213900	183700	156200	228800	162600	192600	243600
DG 36:3|DG 18:1_18:2	636.556	3.742	[M+NH4]+	41570	43230	37140	43970	44240	36830	41350	42940	48450	53190	45750	56020	41090	53100	42290	65010	64870	73720	42840	49860	61720	48060	52510	47920	54330	43290	57320	74730	49630	51830	74290	48040	44740	50300	42600	57100	57970	64940	56430	53750	45540	56810	73270	37430	52980	54840
DG 36:4|DG 16:0_20:4	634.538	3.524	[M+NH4]+	95820	104600	97610	134300	115300	103000	101100	173100	213200	126300	108200	140700	126500	117200	128500	154100	146800	185100	104300	166600	178100	148500	142500	105300	146700	117800	124900	180600	97020	149100	174900	99620	92000	128800	100200	109200	117400	154300	139500	126600	95910	115500	147700	101200	113400	98290
DG 36:5|DG 18:2_18:3	632.524	2.809	[M+NH4]+	0	0	0	0	0	0	0	0	0	0	0	0	0	0	0	1628	0	0	0	0	0	0	685	0	0	0	0	0	0	0	0	0	0	0	0	0	0	0	0	0	0	0	0	0	0	0
DG 37:3|DG 19:1_18:2	650.568	4.003	[M+NH4]+	0	0	0	1075	1087	0	0	1087	2902	1297	865.3	774.4	924.3	0	1091	1595	493.3	713.5	1201	2877	1987	876.3	2106	0	1025	0	725.3	1861	0	1234	2124	0	0	1194	0	1702	0	1823	1559	845.9	0	978.1	925	1538	1543	1698
DG 37:4|DG 17:0_20:4	648.555	3.821	[M+NH4]+	10620	11660	11470	17960	13760	9081	12040	17720	19690	17300	12570	16970	14620	13680	12760	16500	13260	23620	12470	20910	22320	16520	17300	13100	13450	11430	14970	21530	11170	18370	29560	13310	12760	16480	11810	12150	14250	22060	19100	12300	12660	12980	17080	15940	16970	15850
DG 38:1|DG 18:0_20:1	668.619	5.12	[M+NH4]+	65230	56970	64980	113200	119000	45770	64570	117500	167500	119800	86580	134300	97970	94180	78360	105300	62240	147100	68520	125800	140700	106400	105800	154400	91570	73170	126700	183300	95670	112100	178100	72430	99560	127700	89200	102400	91270	161800	154300	92910	108600	92520	131800	152700	159600	175400
DG 38:2|DG 18:1_20:1	666.601	4.665	[M+NH4]+	86900	90570	90740	190600	148600	61900	103100	156800	234600	178500	119100	199300	138500	144400	117500	183900	96930	272500	106600	205700	214300	218100	161500	231800	113800	93110	155000	261200	123200	168500	272800	96130	118500	164700	97500	140900	142600	246100	209200	115200	142900	127600	186200	203600	239700	287600
DG 38:3|DG 20:1_18:2	664.584	4.248	[M+NH4]+	118000	105700	115300	202300	157100	85270	107200	220500	254200	189700	133800	192000	162500	150800	150700	173900	131000	232200	114100	196000	266100	204800	185600	180000	148200	121300	190900	278300	148900	214800	289900	122300	148800	220100	139300	149300	157600	252000	224200	149800	152900	145000	222300	216300	208500	270600
DG 38:4|DG 18:1_20:3	662.568	3.821	[M+NH4]+	885900	866900	866000	1433000	1257000	709700	886800	1901000	2127000	1405000	1119000	1515000	1198000	1163000	1247000	1311000	1115000	1905000	916800	1540000	1963000	1475000	1422000	1321000	1269000	954400	1612000	2191000	1068000	1610000	2239000	1028000	1153000	1666000	1073000	1125000	1131000	1745000	1788000	1194000	1154000	1147000	1744000	1612000	1608000	2166000
DG 38:5|DG 18:1_20:4	660.55	3.626	[M+NH4]+	71600	82280	79640	99670	95760	77990	80090	130900	169000	103400	93770	97960	88800	85210	88020	135600	109700	167000	83070	105800	120800	132700	113900	59810	87790	64230	92620	131300	69240	100200	119300	63180	73490	93010	69800	71190	74510	107600	91350	80760	63970	78300	95290	65260	62930	69800
DG 38:6|DG 16:0_22:6	658.538	3.305	[M+NH4]+	107300	121400	110700	138800	150300	105900	108300	154300	148300	130300	123300	141900	132300	122500	124900	137200	125200	162200	111700	140900	141400	129000	137700	114600	132400	98670	139100	147900	119200	140600	208200	127300	137000	142600	121700	139200	120300	165100	168400	125600	119300	120900	157500	130600	115300	112100
DG 38:7|DG 16:1_22:6	656.523	2.837	[M+NH4]+	0	0	0	1017	1347	0	0	0	0	0	0	0	0	0	746.8	0	0	0	0	0	0	0	0	1248	0	0	0	823.1	0	1223	2428	972.9	0	0	967.2	0	0	1024	0	0	0	0	798.5	0	0	0
DG 40:1|DG 22:0_18:1	696.647	5.671	[M+NH4]+	34140	29340	31100	54420	51470	21640	25430	59690	79440	54630	42330	63060	46650	45980	33660	45960	33230	72920	35120	54110	59110	50310	50370	74150	48880	32950	65320	77980	53160	53710	77170	39360	47530	66780	41630	56130	49380	73080	70400	48180	51930	43780	66250	66390	76220	97320
DG 40:2|DG 18:1_22:1	694.63	5.168	[M+NH4]+	31610	28460	29990	47700	48340	20430	30920	48970	67730	46470	41010	58630	42710	41840	34520	52420	29470	70220	35350	55340	57510	55360	48280	61420	37230	31840	51030	72150	39030	46390	66610	30440	38360	47890	34130	43220	42390	69060	62240	37710	43620	42400	56760	60220	61810	71340
DG 40:4|DG 18:0_22:4	690.601	4.489	[M+NH4]+	50140	49550	50770	98050	78300	32440	41650	83450	105800	91360	63050	94010	66230	73260	59190	82550	48930	135300	52300	107400	125600	89890	86330	115900	68720	50560	86740	153200	68470	100000	115300	62070	75750	108900	56370	66530	75210	135100	119600	66950	77660	73070	102000	123500	122400	132300
DG 40:4|DG 20:0_20:4	690.604	4.678	[M+NH4]+	48960	48160	49680	97310	77570	32330	40690	82650	104800	89410	62260	93610	65160	72550	57970	81320	48900	132600	50880	105800	123900	87620	83440	115600	68290	49970	86310	151700	68370	100400	114300	61650	75710	109300	55880	66520	73630	134100	118800	66410	77010	72430	100600	123100	121000	132000
DG 40:5|DG 18:1_22:4	688.586	4.005	[M+NH4]+	38600	31740	39480	61700	59510	29310	35070	70440	80590	58130	45740	64080	49280	45540	50330	62310	45600	78250	37530	67400	76600	72870	67450	55820	57100	32550	59370	79540	46900	62200	84150	38500	48090	57370	34750	46410	45480	77300	74690	52310	47820	51130	67510	65100	54950	64150
DG 40:6|DG 18:0_22:6	686.568	3.903	[M+NH4]+	162200	173400	149100	250800	243000	152200	168800	246800	182700	242900	190300	259700	211100	175800	231300	195600	176700	276900	169500	239200	262400	250500	267400	168300	168900	125000	210200	291300	187000	244000	327700	190600	159800	228900	174700	169900	145100	222400	286500	173700	179700	177100	187700	272900	194500	221200
DG 40:7|DG 18:1_22:6	684.554	3.396	[M+NH4]+	14470	15480	15170	16250	21460	15150	18510	24650	22770	17830	16770	21540	19110	17650	20460	23170	17420	26580	15890	24560	21240	22450	17320	17490	19040	14680	18010	22710	17400	21090	35150	13730	22130	21540	18100	18290	20670	24990	25440	18260	16740	21010	26470	16380	12610	16160
DG 40:8|DG 18:2_22:6	682.54	2.931	[M+NH4]+	0	0	0	0	0	0	0	0	0	0	0	0	0	0	0	0	0	0	0	0	0	0	0	0	0	0	0	0	0	0	0	0	0	0	0	0	0	0	0	0	0	0	0	0	0	0
DG 41:1|DG 23:0_18:1	710.663	5.917	[M+NH4]+	6462	4169	5265	9551	12860	4183	4291	12180	21250	13810	6653	14710	9384	10460	8924	10460	6228	14740	8728	13320	14980	7524	10270	21970	13260	8021	16030	19930	11720	13300	17740	11780	13610	16950	11190	15450	13970	20070	24090	15980	12540	10200	19820	19760	18680	20870
DG 42:1|DG 24:0_18:1	724.678	6.145	[M+NH4]+	30850	24740	31320	58570	55050	24790	22000	61450	80990	59360	40610	65660	46830	43200	37980	49650	35010	66750	40180	56040	61200	56370	47880	95120	54380	35540	65100	78580	59350	61070	76560	44770	51190	67210	45790	69930	56100	85070	86320	51090	60070	47870	85390	68170	73960	103400
DG 42:2|DG 18:1_24:1	722.66	5.661	[M+NH4]+	35680	30490	35720	50710	45710	28210	33520	52400	68840	45820	39360	61520	46220	48480	34770	52460	36540	68110	40720	56830	55870	60360	44920	72640	44870	40760	58080	67360	49220	56330	69670	39470	49640	60020	45860	52240	51020	62190	72500	46400	54160	45710	72680	64470	65690	86780
DG 42:6|DG 18:1_24:5	714.601	4.049	[M+NH4]+	0	0	0	0	0	0	0	0	0	0	0	0	0	0	0	0	0	0	0	0	0	0	0	0	0	0	0	0	0	0	0	0	0	0	0	0	0	751.4	0	0	0	0	0	0	0	0
DG 44:2|DG 18:1_26:1	750.696	6.114	[M+NH4]+	10360	5632	7608	19250	14310	5165	4898	15470	20640	15530	9988	18090	10560	11380	9398	13780	9016	18370	9696	15670	15920	17000	12730	20520	12590	5680	14970	18320	13340	10790	17490	9930	9742	13240	10320	14210	11160	19030	20640	10660	12780	9982	20210	17020	15800	22000
DG 48:6	803.655	6.751	[M+Na]+	8306	6400	5353	5303	6002	7375	6486	10720	11160	7496	8799	7811	7875	9107	6808	9381	6964	8045	7125	8130	4448	6125	8838	4299	7844	11800	8386	6219	6720	7941	4162	8310	8247	9043	8746	8386	9262	9640	8549	9863	6452	7038	8008	11760	11750	10860
DG 49:8	813.628	6.304	[M+Na]+	0	0	0	0	0	0	0	0	0	0	0	0	0	0	0	0	0	0	0	0	0	0	0	0	0	0	0	0	0	0	0	0	0	0	0	0	0	0	0	0	0	0	0	0	0	0
DG 50:0	843.777	8.055	[M+Na]+	3074	1964	1897	3893	3224	787.4	2445	1966	1489	4114	2545	3098	3177	2199	3512	2039	1346	2742	1831	1958	4866	3241	2422	4727	1803	2328	2047	3548	2402	2872	3821	2735	2200	3472	2548	2665	2159	2340	3694	1819	2789	1734	2793	4091	3965	6834
DG 51:6	845.695	7.273	[M+Na]+	2170	1477	2058	1743	1566	1768	1265	1060	274	640.7	825.3	1536	1298	806.6	1205	706.4	484.9	533.4	1147	1795	3616	3373	1772	2379	1070	873.9	3341	684.8	1062	1244	1183	1250	430.2	839.7	1015	1501	905.4	1187	937.5	524.3	1032	397.8	601.4	2091	1742	3165
DG 52:0	871.802	8.352	[M+Na]+	1117	2797	2566	2243	1807	620.4	1114	1475	713.8	2429	1739	2192	1654	1252	1486	927	649.8	1581	1598	1638	3122	2672	2097	4040	1234	2178	1636	2012	1837	2923	889.5	2500	2171	1428	1548	1550	1179	1541	3225	961.7	2386	703.6	1744	3167	3368	2882
DG 52:1	869.787	8.072	[M+Na]+	10090	10460	11520	15210	14480	9315	11840	9212	7527	11850	13990	11150	11870	11650	10980	8623	6884	9456	7896	11680	15520	10860	10710	17330	8607	7805	9281	11520	10350	11110	9884	8852	8709	10210	11110	8501	8056	9122	13300	6705	11130	6302	10200	16720	10730	18230
DG 52:2	867.776	7.802	[M+Na]+	11990	11150	12710	19740	16290	13520	12780	10460	9137	16640	12550	14210	15260	10980	12760	9678	6847	10000	9521	12040	13360	9880	11960	17000	7022	5921	8847	10570	11390	11510	12140	7352	7881	8812	9053	10350	6967	6841	11820	5288	9270	6100	13700	9482	6537	14620
DG O-40:7|DG O-18:1_22:6	670.578	4.356	[M+NH4]+	711.3	632	1150	1602	1879	293.7	799.7	1653	1879	2053	1108	2374	1390	2312	799.5	2021	511.9	2387	645.9	1926	3182	1304	1037	2928	914.3	1182	3149	2025	1691	1799	3760	1342	2746	1732	2214	2469	1332	4613	3312	1740	2139	1949	3721	2461	3303	6248
FA 9:0	157.123	0.968	[M-H]-	364100	411300	422000	546800	420100	341800	334300	376100	320600	424100	326500	396700	359100	433600	349700	334100	259500	379800	330200	390700	353600	302100	366100	454300	357400	295300	402500	433700	379800	425300	370500	436900	456300	391000	344000	432000	435100	440500	452000	347900	473800	443200	359000	429800	458400	438700
FA 12:0	199.171	1.061	[M-H]-	209400	244500	229300	289200	223900	253600	199000	346200	250900	302700	213100	284200	260800	192500	308900	307000	201500	296000	252700	370600	249100	272200	255400	227800	175400	166400	200100	248000	164300	194500	196900	214800	223600	195000	175200	199200	284500	198000	219400	193200	248200	196500	231000	204900	308800	225800
FA 13:0	213.187	1.111	[M-H]-	51280	53130	56490	64420	49740	74020	44950	67030	56720	63690	55910	66730	57300	49470	67760	58460	42260	40000	47290	41780	48170	42730	37750	62680	60770	34270	48030	52280	58740	56930	41830	48410	53410	60210	48590	70010	60140	44050	59270	59780	67360	56740	50550	51470	39070	44440
FA 14:0	227.201	1.144	[M-H]-	298900	290300	279000	372400	325900	270500	275500	321700	290000	337000	317800	403300	341500	310000	328500	328700	285500	381300	294100	312300	298600	276800	248500	396100	274900	290600	343100	337400	259100	287100	336700	275800	350100	337100	319800	271500	324400	385300	327000	334200	350300	328600	395000	328100	316800	394800
FA 15:0	241.218	1.213	[M-H]-	175400	181900	165000	202300	181300	149300	130200	149400	149800	155100	158500	186400	147600	157500	176500	147000	139300	141200	136600	147100	114800	115000	124600	190200	133900	184100	182200	157000	141500	116100	128300	117700	173100	154700	157100	142800	167300	173100	158400	149200	128600	148000	164500	112000	124400	148300
FA 15:4	233.156	1.064	[M-H]-	89010	76210	79190	89440	108300	125100	91080	98200	100800	89060	86820	106500	82010	85670	90220	84960	79680	76830	78430	93310	101700	91560	78860	111800	68850	89670	75820	88040	97770	119100	111000	69840	81910	76790	89800	98830	78260	83830	89110	79230	105300	91760	92130	114000	112300	122100
FA 16:0	255.232	1.27	[M-H]-	8948000	12090000	10970000	13260000	16370000	9756000	11760000	12860000	16380000	15460000	13330000	15710000	12570000	12660000	11680000	12920000	9386000	16950000	10660000	16270000	16660000	13090000	12350000	19610000	11430000	12090000	17890000	19900000	11620000	12690000	20270000	14530000	16280000	15660000	14110000	13930000	11640000	18640000	15990000	17600000	14710000	14200000	18610000	20610000	20690000	21530000
FA 16:1	253.217	1.18	[M-H]-	301400	359900	314400	461100	534400	264400	436900	354500	570200	517100	410900	584100	387300	442500	348600	409900	298700	610900	307900	431700	531200	389100	358200	836000	448500	420900	644100	805400	420200	442800	1058000	467100	578400	727900	485300	568500	462700	737800	556800	642800	587100	492800	723600	718900	797300	985900
FA 17:0	269.249	1.347	[M-H]-	201200	323100	263600	284300	339700	225100	243800	272100	353900	308300	294200	328600	283400	280200	327100	265700	194600	300800	249800	262700	301400	256000	236400	374500	298300	298900	370600	382000	266500	274000	419900	316400	385400	336400	311700	295400	245000	348500	301800	321800	285300	269100	360800	366800	395300	376900
FA 17:1	267.233	1.236	[M-H]-	143800	184800	192000	193700	242700	115500	124600	136100	176100	186100	190900	196500	153100	185100	224600	172600	129600	174900	133100	123500	125800	121300	123300	240600	181000	221100	189100	197200	180700	141200	211700	169600	229500	174800	169700	167000	182000	189200	187200	166700	163100	146600	190000	166600	166900	145300
FA 18:0	283.264	1.433	[M-H]-	10880000	14670000	12840000	15930000	20280000	11330000	13760000	15610000	22760000	19000000	16920000	19400000	14780000	15200000	15560000	15210000	11010000	20920000	13120000	17710000	21080000	14630000	15260000	24870000	15960000	15300000	24820000	29890000	16650000	17220000	27390000	18930000	22610000	22600000	19020000	18460000	13590000	24680000	21040000	24420000	20100000	18180000	23090000	27930000	30170000	33240000
FA 18:1	281.247	1.306	[M-H]-	4810000	5692000	5565000	9831000	12330000	4457000	6606000	7600000	15350000	11070000	8514000	12370000	7863000	9317000	7198000	11160000	6242000	16510000	6550000	11340000	12800000	8958000	8081000	18800000	10240000	7925000	14420000	22030000	9336000	9465000	22760000	10060000	13740000	17330000	11150000	12910000	8975000	17890000	14860000	17490000	15040000	12460000	18240000	18330000	20500000	22250000
FA 18:1;O	297.242	1.034	[M-H]-	46580	60490	69080	62240	60830	58460	54730	73990	59580	73640	60270	98450	70630	52800	76940	70940	49020	68420	53600	117100	68000	68260	64240	78550	37150	54830	57190	71270	38830	59170	58760	55290	56750	56620	64050	75870	62330	61090	55460	91520	70260	50000	70930	102500	77200	75290
FA 18:2	279.232	1.198	[M-H]-	680200	536200	559200	1241000	1082000	448000	693000	584400	812600	1046000	664600	1254000	847700	1058000	974900	1182000	890700	1645000	803300	841800	1401000	628600	651300	1220000	771800	684700	892400	1496000	801300	619600	1656000	730900	899600	963100	735000	1160000	819500	1368000	1091000	1344000	1399000	1244000	1900000	1083000	1211000	1293000
FA 18:3	277.217	1.121	[M-H]-	138600	54700	58710	143400	109600	32470	50940	42400	47560	90060	81170	146600	103700	117900	114100	201400	86380	107800	70260	45930	72670	37930	39180	128000	127000	91980	76240	144600	87640	41910	93720	56160	70480	70130	65310	85140	63560	83190	84480	97510	97450	79600	122300	51720	54030	64910
FA 19:0	297.28	1.541	[M-H]-	46850	55700	52260	54950	66160	51060	60030	76170	92210	64360	65530	89420	59230	51960	53960	54600	50740	81680	52140	75200	81710	72230	65410	86290	53150	67040	83900	104900	51760	71410	105900	70890	72480	91360	73240	68260	61830	90960	66510	85450	86330	63180	85350	99540	119600	103700
FA 20:0	311.294	1.655	[M-H]-	160500	192400	180100	251400	272500	164800	189100	263200	403100	296800	230600	295500	225000	243100	207400	264800	196200	353900	213500	286100	309400	246200	231900	315600	216400	233900	371500	435700	215900	226300	370300	262100	321400	376900	273300	256100	225400	352400	270700	371800	323400	268400	318300	395300	466200	415200
FA 20:1	309.28	1.47	[M-H]-	699500	740000	848600	1404000	1465000	646100	838400	1006000	1891000	1437000	1089000	1508000	1063000	1310000	882800	1510000	911000	2142000	964900	1330000	1548000	1249000	1011000	2221000	1159000	1074000	1803000	2670000	1198000	1177000	2457000	1286000	1768000	2144000	1385000	1489000	1318000	2243000	1813000	1937000	1902000	1543000	1924000	2249000	2865000	2438000
FA 20:2	307.263	1.329	[M-H]-	102800	121900	122100	195900	250500	107200	157800	147800	228200	215700	160300	240100	178600	195700	163100	236300	160100	337900	158100	202100	241900	168400	170600	309300	174800	132200	255100	338400	210200	185200	361900	197800	248400	288200	197700	275900	190200	329600	281100	292300	305600	261800	375700	336200	300800	325100
FA 20:4	303.233	1.172	[M-H]-	10410000	12430000	11500000	15690000	20520000	10240000	10690000	11320000	18970000	15370000	15400000	17110000	12620000	13430000	14930000	14330000	8982000	18970000	10950000	14270000	18990000	11480000	13510000	26860000	15230000	10510000	19780000	24230000	17290000	15110000	22850000	14820000	19570000	18480000	15620000	18170000	9888000	22530000	20200000	20370000	18770000	14650000	21310000	24180000	23960000	29390000
FA 20:5	301.217	1.092	[M-H]-	208200	212800	225300	253100	216900	162600	206000	194900	207900	213500	210700	226700	200100	213700	223600	211100	161600	232500	192400	219800	238600	197000	181100	329400	208200	215300	251700	275800	225100	212000	267500	224800	223200	216200	210500	236400	218000	273400	231300	240900	248500	183600	294200	318200	265200	361300
FA 21:0	325.31	1.784	[M-H]-	19050	21480	20970	23900	28360	18650	22020	39450	59380	34570	27440	39650	27970	28050	23090	28230	23720	35870	25010	31460	39600	32170	28680	35510	28700	30640	45810	45640	25880	30080	42760	37210	40960	47250	34800	33890	30470	43000	31440	43120	34010	29250	38470	44220	50880	41770
FA 22:0	339.324	1.938	[M-H]-	39890	56860	51440	59950	70180	47690	53950	112600	209800	86090	66850	96380	53460	68620	59520	82240	60560	113400	57170	80620	98470	79510	71160	102600	77180	66990	123900	161000	59540	72020	129900	72620	101500	137900	84750	81370	66990	121800	89650	144300	86680	87670	105200	127500	169700	163400
FA 22:1	337.311	1.67	[M-H]-	201100	201000	254800	396000	358700	178700	220500	295700	458600	373000	288600	454300	287600	325600	237700	368000	228400	494400	256800	349200	416100	327800	279600	536600	307200	321400	519800	655800	316400	325100	572200	368200	498300	608500	381900	421300	354900	573600	414000	518600	505800	406200	446700	648000	840700	684800
FA 22:2	335.294	1.504	[M-H]-	14010	13370	15800	24700	25640	16760	22360	22430	28580	24900	17390	28800	20940	23030	18810	26340	19930	39400	20550	24850	27120	26230	20770	31950	17150	14920	23840	35330	21760	21970	41820	21510	25000	30050	18790	25280	21220	31760	27970	26770	32630	27780	30030	32400	35920	35160
FA 22:3	333.28	1.378	[M-H]-	34300	28660	34980	44640	54740	64320	57840	77330	107600	50450	37260	54650	41060	54740	37300	56120	37820	70600	41630	63110	79820	64690	60070	79580	53000	46520	63840	94950	43460	62130	103000	45250	58460	76910	49440	53900	53300	77950	64870	67850	64610	52530	86330	87590	93320	101000
FA 22:4	331.263	1.27	[M-H]-	212200	276400	270200	426800	614700	192300	337200	374300	841700	542200	385600	626500	378700	481500	351600	542200	293900	882300	307200	539700	710000	413800	458000	1083000	587900	450400	865900	1167000	507500	507000	1041000	546100	762700	943900	619600	710600	472400	1082000	845700	974500	826200	686700	1055000	1049000	1175000	1179000
FA 22:5	329.248	1.18	[M-H]-	135100	172000	174400	238300	328100	129800	221200	221800	304100	296700	255000	297600	220200	230400	212300	239000	153200	338200	165400	260400	301800	220200	231100	443100	250400	204500	324300	384400	272500	250700	472900	276000	323800	364200	296800	321300	236300	383500	353200	355300	333600	261800	398300	397500	380300	493500
FA 22:6	327.232	1.108	[M-H]-	1764000	2490000	2091000	3107000	5311000	1905000	2711000	3075000	4787000	4127000	3523000	4442000	3272000	3209000	2791000	3741000	2146000	5262000	2259000	4015000	3803000	2956000	3017000	6680000	3941000	2794000	4943000	5675000	4212000	3775000	7469000	4080000	5073000	5818000	4321000	4848000	3113000	5518000	5567000	6114000	5318000	4132000	5817000	6359000	5742000	7855000
FA 23:0	353.342	1.94	[M-H]-	22890	25790	22380	36990	45780	16620	19910	90530	178900	52530	34210	64550	33130	33100	28300	41290	26840	80920	23470	60360	64740	37810	34090	105900	36490	33030	67480	77860	33100	36380	61540	30970	50720	68290	37600	32410	31200	59430	55010	58520	55530	42390	52240	87680	90470	76930
FA 23:1	351.326	1.802	[M-H]-	21520	22770	23420	40110	45950	17810	25660	38490	83350	49120	39570	67060	34360	45250	28420	50380	28870	68230	27380	48770	58530	32280	32680	85770	55520	54600	90900	106500	43320	51080	106400	58960	90280	113900	65080	66460	59150	96960	62450	103300	77740	66470	69030	112200	148700	97830
FA 24:0	367.357	2.331	[M-H]-	46930	60970	57440	62590	85670	64790	74660	124300	230800	104300	80790	116200	75500	83340	82060	105100	99380	142700	66820	92450	109000	93310	83290	109000	120600	95420	168300	199700	81190	105100	173100	108800	137900	193700	130500	113600	108300	155400	112800	204900	110700	132800	150400	139700	194900	184200
FA 24:1	365.342	1.951	[M-H]-	201800	189700	216500	296100	297000	175700	232800	374700	606800	312500	281100	396000	243300	278100	211700	356800	263900	427300	222500	325500	357800	308100	253000	442900	329700	310500	443800	527100	290100	316500	469800	318900	420200	519800	320600	370400	339600	483100	392600	457400	398000	390800	442900	489800	614500	591600
FA 24:2	363.325	1.718	[M-H]-	10700	8881	9635	15210	14960	11340	14220	13260	27020	18080	12910	23770	13120	16380	12120	20260	12370	25420	13080	17710	22140	15890	14040	25900	17090	15380	22690	24890	14400	13800	29040	20090	21250	27430	18930	23310	19610	25470	18280	23970	26310	20130	21920	29050	33050	32080
FA 24:3	361.311	1.58	[M-H]-	4332	3060	3667	8169	5647	3006	3800	5027	5262	5595	3952	6221	4586	5670	4322	4787	3785	7127	3639	4096	6037	4958	4659	7753	4887	4556	5252	8672	5021	3680	8598	6224	8634	6339	4874	5464	8686	6881	5543	7339	8669	4588	6671	6581	6965	10150
FA 24:6	355.265	1.218	[M-H]-	66700	75510	80820	84860	87060	62850	77260	59610	72050	97650	88410	99700	82550	86620	86230	78480	66340	88480	72260	92040	101000	83420	86330	109000	79730	91080	101200	98230	77060	76250	103800	91850	86460	101300	85300	94290	89700	99220	95140	91130	92600	78860	98760	106900	111400	125000
FA 26:1	393.37	2.329	[M-H]-	16880	12790	16040	24570	29360	13570	16210	28920	67760	31120	25270	41500	21290	31000	21140	37810	24960	58230	23180	34090	41550	36170	26210	45910	40880	26890	57190	80400	28400	37020	66950	36080	50600	70760	42550	42420	36370	62860	42840	68940	43810	46430	55990	55200	83650	71930
HexCer 32:1;2O|HexCer 18:1;2O/14:0	672.538	2.227	[M+H]+	57760	44990	68990	56200	51500	62630	52050	62960	52990	51390	56890	48790	62940	48950	45200	54420	50460	53370	52880	56000	44900	82780	48330	31210	26450	26970	23420	28100	33290	32060	28650	22940	23160	24890	25480	26090	32300	28160	27700	21530	30570	25970	22110	28510	21460	30970
HexCer 34:1;2O|HexCer 18:1;2O/16:0-1	682.557	2.649	[M+H-H2O]+	55450	61480	63960	50010	47260	78460	77760	72800	52250	49300	48050	41280	52040	55370	40720	56540	73280	47150	69150	52850	32220	65160	60760	29830	54760	57950	36830	66000	45710	44180	48220	53790	47400	36400	38820	49600	64460	36310	30730	57500	49030	43790	30510	35590	43100	23920
HexCer 34:1;2O|HexCer 18:1;2O/16:0-2	700.572	2.651	[M+H]+	80420	77080	94630	64380	66430	110800	105700	94230	104500	78420	94680	55100	78130	76350	69160	85340	123800	75740	84740	69760	63490	85210	75900	34640	96190	78180	65710	104200	82970	66840	70980	90680	71250	59810	72720	72260	89580	60110	47140	86570	72400	72810	55860	50290	58310	37300
HexCer 36:1;2O|HexCer 18:1;2O/18:0-1	710.589	3.186	[M+H-H2O]+	145700	159200	172200	102300	111900	352100	227400	269300	248300	122700	158900	98730	135100	153900	144600	173100	327600	132900	217800	112000	88540	157700	148700	57150	226500	174000	123500	260000	175800	131800	122700	172600	137800	127300	148300	180600	245100	109700	72310	251600	141500	174500	91650	96100	121100	61480
HexCer 36:1;2O|HexCer 18:1;2O/18:0-2	728.6	3.187	[M+H]+	189200	237600	251900	171700	129600	475400	287400	343500	370100	173000	220500	149900	208800	201300	211500	257100	488700	187300	260900	157600	141000	207500	220600	78420	336900	262100	178200	401500	233500	201700	201500	299200	210200	167700	239200	230100	334700	152100	118700	336000	216100	235500	139000	129300	171400	88200
HexCer 36:1;3O|HexCer 18:1;2O/18:0;O-1	726.583	2.722	[M+H-H2O]+	101300	118500	110600	116500	93380	114000	111900	125400	111100	124600	129800	105600	108800	115800	102100	108300	105900	124900	113500	123300	128300	125800	110500	104000	105300	114000	103400	133900	105800	111300	96120	108900	106600	101800	119100	109100	112500	112100	94650	100500	121600	104100	91560	106600	115300	88780
HexCer 36:2;2O|HexCer 18:2;2O/18:0	708.577	2.724	[M+H-H2O]+	76880	73570	79480	80320	73010	80130	71260	88960	66610	79020	76090	78810	79300	78490	62890	67580	83760	72770	75480	86090	76320	90320	74530	61320	54660	80560	70020	83230	70530	81130	59900	66750	61400	67850	69900	67510	78320	63490	68970	60960	70420	67060	56210	75050	80690	53740
HexCer 36:2;3O	742.578	2.606	[M+H]+	68960	65730	66350	63540	53180	80050	92570	77460	80960	84770	73990	67100	75650	70510	52550	70010	86600	73090	65450	80180	69960	80470	64380	63110	67850	74250	62510	75980	75390	78990	69810	70280	63080	72340	87770	87310	89110	70060	80350	71440	82090	92110	68330	68750	71950	49190
HexCer 36:2;3O|HexCer 18:2;2O/18:0;O	724.57	2.605	[M+H-H2O]+	70760	71820	77220	81000	70240	76690	83290	83340	62760	73990	79150	69430	67060	77370	52690	75990	64760	72580	64360	83440	63840	88370	70660	60950	75230	80140	65330	81690	73330	74270	82610	70420	71670	62970	86830	72220	82630	83540	64240	65880	81900	58320	55470	75640	88340	59600
HexCer 38:1;2O|HexCer 18:1;2O/20:0-1	738.622	3.761	[M+H-H2O]+	33140	37280	39300	27390	19390	60210	34390	65570	54930	30530	29720	22050	31190	37070	33300	37210	57570	32130	40830	22770	26350	36650	36680	15830	48660	38650	30470	81260	40790	27260	22150	47620	40700	32780	28440	38340	50720	25030	18780	59680	39050	32150	24150	26990	34850	14980
HexCer 38:1;2O|HexCer 18:1;2O/20:0-2	756.625	3.76	[M+H]+	45970	58600	58330	41470	31900	86220	56090	80230	82630	41770	51340	36420	43390	43810	49320	52990	106300	44000	58440	37710	35690	52360	57470	18540	75210	58410	43040	104300	60360	42710	31490	67430	45840	40580	41680	50980	74180	34180	23240	95310	51120	48020	31350	35830	43240	22980
HexCer 39:1;2O|HexCer 18:1;2O/21:0	770.649	4.07	[M+H]+	371.3	1220	2808	397.8	506	2840	1291	3647	3792	311.9	1998	148.9	566.7	365	2049	1291	1888	489.6	1003	706.2	645.7	656.4	1218	499	2406	2474	1622	3139	1094	975.8	306.6	3170	1996	394.1	1487	1651	1873	1513	431.1	3941	1935	1032	476	1633	1406	538.2
HexCer 40:0;2O|HexCer 18:0;2O/22:0	786.677	4.512	[M+H]+	28510	33810	33140	37630	15550	46100	26290	57570	53260	28380	27500	23750	25570	30520	31300	28770	43630	28300	38940	29170	32290	38430	43890	26750	44130	28860	33670	83240	54060	29630	25140	56650	35260	30480	26420	38560	49330	27800	21400	58360	46490	25870	21660	33300	51610	24730
HexCer 40:1;2O|HexCer 18:1;2O/22:0-1	766.65	4.347	[M+H-H2O]+	63530	75640	68670	73380	33820	104000	56660	114200	107600	48140	60390	48020	50910	68370	65920	71950	111400	56730	85250	55210	49040	84440	78790	50380	113200	77750	80870	238600	103700	55110	54300	128800	88560	65030	64110	95260	113800	53710	45780	135700	102800	66900	61660	64040	113400	50820
HexCer 40:1;2O|HexCer 18:1;2O/22:0-2	784.663	4.348	[M+H]+	85540	111900	111600	91250	40830	147700	76600	171500	153800	74000	75430	58580	65610	98030	92780	81400	142200	76050	112000	82040	73670	105900	120400	61850	170600	110500	113400	264400	157900	88900	66050	184200	125600	88960	93150	135300	172400	93610	64230	210000	136100	88140	84320	87190	156400	71670
HexCer 41:1;2O|HexCer 18:1;2O/23:0-1	780.665	4.635	[M+H-H2O]+	16800	19140	19010	20460	8272	25730	14020	36560	35110	14740	16250	13800	12090	20400	20450	14360	23600	16630	21380	15610	16980	19750	28790	23810	50480	26680	38310	110900	50800	22320	19910	69420	37490	29630	22750	36780	44780	23630	19080	65450	40220	20430	19980	28210	56300	20060
HexCer 41:1;2O|HexCer 18:1;2O/23:0-2	798.677	4.633	[M+H]+	26560	40490	31360	36530	14200	47080	26470	58720	57810	27500	24860	28180	27060	34930	35600	32970	46840	30700	37060	32050	31630	35510	46030	40560	84430	42400	62450	186600	70680	44640	38480	97720	56480	49640	39150	65990	81090	45390	29490	108000	60660	39730	38740	49850	94700	36300
HexCer 41:2;2O|HexCer 18:1;2O/23:1	778.656	4.05	[M+H-H2O]+	94950	117000	107600	94870	96690	140400	130900	160900	164800	110800	107400	110500	101300	110600	105100	111500	133900	103600	106400	103400	104200	97320	110100	111300	131400	141000	123500	163400	122400	128000	143600	161100	133200	135800	113700	133500	152000	133900	102700	143000	122300	126300	101200	127700	132200	97470
HexCer 42:1;2O|HexCer 18:1;2O/24:0-1	794.682	4.911	[M+H-H2O]+	81380	94400	106200	103000	24660	145200	64690	173300	145700	55540	67690	57080	62630	86830	94580	87120	139200	69960	123100	64560	76140	101600	120800	78150	225400	127300	170600	494100	227300	84310	82750	285300	145200	97900	103800	161100	204800	88320	70090	303000	169800	109500	97040	105600	228600	86970
HexCer 42:1;2O|HexCer 18:1;2O/24:0-2	812.692	4.911	[M+H]+	93370	125400	121200	135400	44110	206500	79760	187100	150200	76090	88250	69540	75320	110800	106900	96110	176300	89760	133500	95100	77810	132800	174100	133000	269900	161700	192700	530700	232000	117000	86980	408900	161500	127200	134100	215200	245400	112800	90750	321700	201400	127900	119000	130700	243300	103500
HexCer 42:2;2O|HexCer 18:1;2O/24:1	792.666	4.323	[M+H-H2O]+	4365000	5285000	4641000	4447000	4258000	6234000	5322000	5903000	6338000	4383000	4901000	4511000	4512000	4973000	5160000	5523000	6638000	4845000	5753000	4013000	3824000	5024000	4839000	4642000	6750000	5827000	5193000	8652000	6313000	5528000	4722000	7066000	6388000	5599000	5152000	6627000	6970000	5295000	4070000	6852000	6282000	5932000	4521000	5412000	6194000	4411000
HexCer 42:2;3O|HexCer 18:1;2O/24:1;O-1	808.66	4.161	[M+H-H2O]+	1872000	2355000	2448000	1868000	1768000	3262000	2487000	3544000	4659000	1996000	2092000	1974000	2051000	2358000	2069000	2384000	2688000	1957000	2079000	1781000	1841000	1883000	2111000	1975000	3040000	3017000	2412000	2726000	2673000	3452000	2701000	3327000	3140000	2815000	3282000	3596000	3718000	3332000	2526000	3222000	2989000	3639000	2688000	2671000	3186000	2575000
HexCer 42:1;3O|HexCer 18:1;2O/24:0;O-2	828.689	4.747	[M+H]+	887100	1148000	1085000	926800	832400	1571000	1114000	1979000	2109000	1008000	1052000	1068000	929800	1019000	978600	1422000	1218000	945000	1061000	859500	997600	842100	993800	908600	1678000	1409000	1374000	1316000	1404000	1711000	1712000	1508000	1582000	1364000	1690000	1950000	1826000	1514000	1387000	1933000	1457000	1831000	1431000	1372000	1566000	1209000
HexCer 42:3;3O|HexCer 18:1;2O/24:2;O-1	806.649	3.706	[M+H-H2O]+	187500	182400	191900	166700	166800	261500	224300	266900	277900	189400	178900	192300	187500	199400	173100	210700	222600	191400	187700	190700	183500	183300	177400	160800	240200	224400	205400	211500	217700	245400	245200	240200	232100	231100	243000	250900	234700	242200	200400	239800	226800	286800	184300	211600	242300	177700
HexCer 43:1;2O|HexCer 18:1;2O/25:0-1	808.708	5.177	[M+H-H2O]+	509.2	675.8	672.9	1561	193.6	680.1	553	1988	626.9	264.6	190.7	373.1	164.1	0	552.3	938.2	1820	722.4	1462	324.8	577.4	782.2	1640	1137	3344	1233	2630	9209	3354	376.6	956.7	4571	1632	754.7	1034	1676	2880	609.8	572.2	5078	2145	918.8	922.8	607.9	2593	346.1
HexCer 43:1;3O|HexCer 18:1;2O/25:0;O	824.692	5.027	[M+H-H2O]+	1647	1966	1405	1235	2327	4779	1364	5537	971	1547	1489	2619	2434	2072	1368	1757	1942	2063	1519	3021	2978	1555	2136	3407	1935	1919	1832	4195	2557	2448	1683	5437	2351	2145	1786	1042	3692	913.3	2296	2433	1113	1470	2625	846.5	2803	2115
HexCer 43:2;2O|HexCer 18:1;2O/25:1	806.682	4.599	[M+H-H2O]+	54060	69070	63720	62980	53080	83230	77680	93130	100100	59940	63640	56310	50370	67420	69560	64480	79420	68190	69140	51820	59840	56320	76250	83100	128800	80990	88950	188500	115100	81070	88310	141500	113800	97480	72320	100800	122500	79130	63810	155500	109200	72380	63120	99390	135100	67450
HexCer 44:2;2O|HexCer 18:1;2O/26:1	820.698	4.855	[M+H-H2O]+	14100	19900	18470	16910	10050	29280	21070	31720	31590	15260	15730	11270	13920	16130	22380	21230	25100	15520	20230	13870	13230	19180	18070	14820	41110	20470	22600	62880	29870	18280	14760	38910	27100	20710	19610	24920	32520	17030	14080	51050	34890	20290	13750	22910	42150	14690
HexCer 44:2;3O|HexCer 18:1;2O/26:1;O	854.706	4.687	[M+H]+	12460	15840	26800	26900	20030	28170	22420	31080	39060	26590	20710	22900	23930	22120	18400	27050	20700	22890	21400	24550	24120	27650	25640	29880	27090	17430	18180	30790	28980	38870	26920	31060	28010	24450	26140	38230	33590	25570	28360	24540	23190	21390	18880	35140	35740	29720
LPC 14:0	468.326	1.029	[M+H]+	169300	169400	165100	179100	163500	153100	182500	166900	167000	169300	161200	152700	170000	174800	153600	114900	158500	172300	174900	176900	176900	164800	177300	178800	170700	170300	178700	166700	168500	173200	173600	174100	167000	170900	173400	155000	160900	181100	171900	152200	181900	166700	168200	181000	178800	183000
LPC 16:0	554.345	1.134	[M+CH3COO]-	1910000	1854000	1864000	2208000	2146000	1574000	1730000	1582000	1619000	2221000	1855000	2089000	1997000	1906000	1795000	1677000	1396000	1982000	1657000	1952000	2425000	1855000	1891000	3058000	1781000	1693000	1744000	1921000	1958000	1786000	1850000	1724000	1699000	1760000	1551000	1975000	1830000	1955000	2063000	1593000	2229000	1511000	2172000	2094000	1901000	2181000
LPC 16:1	552.331	1.06	[M+CH3COO]-	292400	389300	381100	324900	475700	244700	272200	321000	349300	435600	507800	403700	444000	448900	495100	252100	270300	300100	335600	244600	189100	231300	250700	551800	445600	551300	456600	434200	465000	369100	414100	470600	524900	430600	480800	474300	462600	405800	426400	359200	342700	383600	382800	382200	320000	329500
LPC 17:0	568.362	1.19	[M+CH3COO]-	46190	44830	47940	36970	27600	27050	27620	52230	32020	39620	32260	34160	34740	33420	41900	31370	38830	25810	30360	26160	47900	38950	44970	35420	28030	36370	18840	22800	28440	22270	27260	24790	19230	23550	22170	27460	37370	26910	28610	20020	33450	21260	25120	24170	19140	24680
LPC 18:0	582.377	1.252	[M+CH3COO]-	1448000	1333000	1427000	1561000	1408000	1259000	1151000	1141000	1103000	1596000	1350000	1446000	1540000	1398000	1354000	1247000	1064000	1463000	1229000	1340000	1673000	1218000	1304000	2088000	1258000	1285000	1190000	1225000	1322000	1225000	1188000	1158000	1137000	1221000	1118000	1338000	1308000	1347000	1414000	1098000	1611000	1032000	1436000	1432000	1355000	1545000
LPC 18:1	580.362	1.152	[M+CH3COO]-	1189000	1123000	1186000	1432000	1244000	1103000	1106000	1064000	976700	1363000	1167000	1262000	1225000	1179000	1075000	1033000	871800	1144000	1061000	1207000	1343000	1168000	1141000	1695000	981300	1055000	975900	1090000	1181000	1089000	1088000	1042000	1002000	1043000	936600	1132000	1123000	1154000	1203000	821600	1278000	864200	1158000	1270000	1173000	1219000
LPC 18:2	520.338	1.076	[M+H]+	37130	39670	44200	39250	37740	45370	47910	62470	80570	57360	62770	60110	39740	43900	51640	58610	38510	53370	42120	69420	83510	61400	56950	49270	25940	45470	43210	34000	31670	48750	58660	43620	39510	37880	40270	155200	36480	57030	46290	55770	49540	44530	64270	71410	62020	77240
LPC 20:0	610.41	1.41	[M+CH3COO]-	162100	100400	181600	177900	169700	151200	142900	211700	172500	163100	108800	169800	150800	148300	159300	144500	132500	166800	127600	179600	167200	171700	100900	188300	120600	69710	123400	121100	135400	113100	119500	109900	137000	107200	123700	124500	147100	130700	135700	96590	149800	107500	120400	150900	134000	126600
LPC 20:1	608.391	1.27	[M+CH3COO]-	245600	183800	193300	290200	262200	173600	170900	292900	238800	240900	207600	217000	200800	196100	197900	204900	152300	214100	170700	294100	259200	221500	211700	287500	175300	173400	158400	188900	217400	179300	215000	155500	187700	155900	170100	182000	160500	228200	205400	160600	263300	148100	197500	230000	317100	242100
LPC 20:4	602.348	1.066	[M+CH3COO]-	57160	47890	51540	71720	72490	52540	57160	85200	75170	74370	62840	63990	63710	64610	66210	46240	36610	65290	56720	75650	85100	70240	80660	106100	48290	44910	68600	74160	57170	66800	84240	53420	57650	65060	55380	73510	48680	79090	80500	58430	64930	44310	87650	105300	93110	110500
LPC 20:5	600.332	1.01	[M+CH3COO]-	73860	66940	68640	75380	69880	53330	57070	70380	59140	75050	66180	58480	65320	71680	62470	45470	54790	62780	65880	73110	76060	70350	77890	62610	38880	54490	56930	41570	41740	40280	45510	44370	40260	43170	42810	36630	42640	46940	54690	37700	42380	39210	49990	56510	49880	56500
LPC 21:0	566.417	1.509	[M+H]+	16920	17680	18310	21480	21420	14840	16030	14350	12650	22820	20090	24260	18810	18860	19200	18490	10840	21790	18950	26850	24690	19470	21960	26480	13120	15640	15790	17160	16720	17290	18670	15270	15770	16950	16510	15900	13720	21650	18790	11940	18250	13310	19190	24880	19450	23230
LPC 22:0	638.437	1.618	[M+CH3COO]-	65590	50040	52200	64550	59170	51210	47840	47250	45340	59870	53470	60870	55580	51660	48160	48920	44020	61490	56070	62650	60280	52800	54170	77930	48230	48630	42850	48040	56650	48520	46890	49380	47020	45560	46610	56370	56250	53400	56040	39990	60490	45120	50630	49480	42470	48630
LPC 22:1	578.417	1.427	[M+H]+	53230	55240	60260	72340	66370	44820	45550	46680	45800	73340	61440	82320	61440	58240	61030	70640	37280	74190	52890	80170	73900	66630	64580	96190	37100	39440	51390	47160	46330	47260	55650	43680	43730	48330	42070	52330	38350	66400	73820	38450	64100	42680	64670	74290	63990	76600
LPC 22:6	626.346	1.042	[M+CH3COO]-	104800	115300	109300	131500	159700	90590	94750	146900	141100	128900	119000	123800	112200	121600	113200	95700	80170	126300	100700	141700	146400	132600	149400	238300	130800	114700	154900	171500	140400	135200	188300	145100	151600	136300	133700	141200	121700	175500	188600	136000	136900	119800	208000	203300	193200	265100
LPC 23:0	594.449	1.758	[M+H]+	80830	68450	73110	86980	87110	61030	64020	52880	40160	95790	70840	112500	90590	82640	76830	71340	57420	87110	81260	101200	95380	69020	83500	137300	80970	73550	78260	66110	87940	87530	66260	87250	69750	80580	65420	87780	88010	108300	103100	54800	104100	77840	89180	90930	63620	78610
LPC 23:1	592.434	1.514	[M+H]+	6749	8742	7471	10750	10600	6362	6725	6491	6887	13180	8864	13520	9578	9474	10040	9815	5282	10630	7594	11610	12280	8135	10730	14330	7029	7091	8617	7397	6724	9442	10120	8045	8160	8426	8799	8309	7764	12290	13410	7795	11440	7562	11000	14640	10860	13640
LPC 24:0	608.463	1.909	[M+H]+	703500	662400	682000	832700	734700	589400	630600	344900	315400	847500	644000	865100	730600	677000	662300	618600	521600	835100	707400	821700	859200	726400	749400	1108000	662100	621100	609700	580900	847600	743300	670300	721100	603400	587100	615200	771800	804600	831000	912400	447900	896400	700600	851300	661100	577800	751700
LPC 24:1	664.451	1.626	[M+CH3COO]-	45910	35710	40520	45800	44110	35730	33390	40840	40810	43370	36650	55030	41860	41450	41410	70540	37350	47800	41280	48340	45570	39240	39480	62990	40480	34210	34070	34430	43390	33650	32370	36770	39580	31800	32540	53230	46630	43250	45000	31630	50440	36780	45050	44220	35180	37990
LPC 25:0	622.481	2.088	[M+H]+	73160	71030	72860	78090	83840	58370	68130	50340	49340	87960	71370	106900	76900	84230	71350	65070	73250	87190	63540	89380	100700	64710	83090	136500	94110	76660	84740	71620	101400	92530	103700	100200	75200	84160	81310	90950	95400	99640	112800	63870	112300	91320	111200	96600	83930	83760
LPC 26:0	636.497	2.262	[M+H]+	138400	141400	134200	160700	151700	123400	108900	104200	96890	156800	124600	160400	142000	136600	119900	124800	113500	155400	133800	178000	159800	128200	138100	209400	151000	140300	146300	131900	176400	165700	144100	159100	135700	133700	128200	154200	146600	169900	202300	111800	165500	155500	152800	147300	140700	113600
LPC 26:1	634.477	1.903	[M+H]+	209900	180100	193500	226800	208000	165500	160200	95110	88810	220300	180200	226400	212100	198300	169300	178800	140800	233200	188800	237500	216500	212000	192600	265900	154000	136700	148100	154800	190400	179600	159300	154600	149300	157900	149300	176500	157200	190000	219800	111200	210100	165600	175500	187600	164000	173500
LPC 27:0	650.521	1.716	[M+H]+	267300	300900	297200	326200	331900	263300	301300	172500	161700	362100	308400	323800	313900	295500	298700	283100	189500	322500	288600	306600	314300	322100	318400	397800	276800	293000	362500	356600	328900	366100	383600	385300	338300	347900	313600	321200	292400	362700	397000	323600	334300	318100	358900	395900	389500	450400
LPC 28:0	664.523	2.277	[M+H]+	22240	16680	23430	24430	22210	19150	27650	17580	16120	21110	17740	22720	20080	18180	17600	20640	17710	20740	19850	26850	17670	31720	20630	20260	13080	12460	13090	12810	15660	12810	20320	12810	10350	10850	12900	13950	16240	17490	18350	9868	16960	13670	11630	15120	9843	16670
LPC 28:2	660.512	1.893	[M+H]+	42860	34420	35400	52800	47070	35810	33540	33300	33140	51210	36040	49740	49410	43090	35380	37660	30750	46150	31710	55280	46930	43650	40990	43980	25680	31790	28340	35600	36270	33660	35150	29600	29260	29900	25150	34660	32780	38240	42030	19780	40690	31930	30900	44870	38640	45850
LPE 16:0	452.276	1.157	[M-H]-	244000	249800	235200	262100	289600	227000	283500	326400	261900	277300	266500	315600	265800	265400	287700	283500	220100	287700	241700	348700	342300	347400	415200	373200	259600	251200	268200	280600	280100	268900	341300	268300	267000	266400	248600	309900	272600	304000	326900	306300	352600	270600	312300	391900	380400	387600
LPE 16:1	452.275	1.068	[M+H]+	11320	12490	17890	10690	13330	17320	15650	22760	16930	16450	18730	30750	12700	12520	23890	69210	11110	13520	13180	21290	19370	22280	23880	15870	10420	12610	14120	12600	11190	14310	21570	12610	11270	12050	12910	17710	13250	14440	12480	12090	12020	13680	14520	21880	22810	24500
LPE 17:0	468.304	1.216	[M+H]+	19920	21430	23110	20560	21840	19360	22070	19430	18870	23100	22190	23080	22540	20070	23850	23830	18650	25450	19800	22360	23630	23420	24810	25160	17900	19730	22280	20850	19380	19240	23610	18380	19610	21990	21390	21530	19660	24270	23200	18410	23720	22660	23980	24430	24790	24400
LPE 18:0	480.31	1.272	[M-H]-	815000	801100	768900	863800	893800	644900	783300	785000	751800	905700	833500	992900	822900	868700	875900	779800	725400	938600	803500	907900	937500	829300	941800	1257000	897500	905600	967100	1015000	895900	824900	1067000	902800	895400	953900	877200	982500	897200	1024000	1054000	1047000	1193000	850800	1098000	1199000	1211000	1242000
LPE 18:1	478.293	1.165	[M-H]-	892200	1004000	1193000	1105000	1119000	1527000	1684000	3457000	2197000	1072000	1187000	1113000	1001000	1126000	1077000	1029000	787900	1055000	882200	2971000	2217000	3071000	4136000	1231000	796100	965800	847700	874300	875700	1416000	1852000	893200	893200	826100	892100	985800	979500	1049000	1044000	758600	982700	794200	918400	3031000	3063000	2373000
LPE 18:2	478.292	1.088	[M+H]+	8254	10340	12220	10500	12570	10970	13870	19290	14650	16290	14880	17330	13200	13060	14770	21220	10340	17600	11750	16030	20950	16380	21760	15260	8833	10600	10790	9733	10940	14500	18270	10710	13060	10800	11200	16040	13870	18600	14350	11610	14910	15830	17260	20450	19780	21420
LPE 20:0	508.338	1.258	[M-H]-	267900	282500	311200	293100	310600	271300	283000	400400	325600	319900	299900	307500	270100	295100	316900	243300	195700	267800	230500	365900	326700	350600	429500	346900	250700	275800	235400	246800	250200	263200	301700	240900	268200	241300	250000	250900	260700	259800	269400	205100	262000	199200	244600	358000	349800	319400
LPE 20:1	506.324	1.272	[M-H]-	1767000	2251000	2404000	2097000	2386000	2016000	2113000	3170000	2541000	2177000	2260000	2194000	1793000	2305000	2404000	1510000	1197000	1555000	1460000	2717000	1956000	2707000	3471000	2105000	1813000	2495000	1670000	1692000	1736000	1943000	2177000	1846000	2136000	1582000	1866000	1708000	2081000	1723000	1790000	1153000	1379000	1380000	1366000	2629000	2640000	1820000
LPE 20:2	506.322	1.178	[M+H]+	27010	25840	36910	28220	32440	40610	39060	83850	52870	33590	38190	41090	26550	32000	35520	50110	21330	30720	25030	70730	49280	72300	98280	28500	20910	27680	24490	21770	21550	36880	44240	24240	23470	26370	26240	32030	26340	31690	27380	18030	21160	24590	25920	62230	60280	57690
LPE 20:4	500.279	1.079	[M-H]-	134600	175700	189800	176600	225500	238800	259000	614300	432600	201500	221700	203200	174400	200400	213500	171100	123500	185100	143900	510300	393400	456000	776800	276300	158500	189000	193800	196600	164600	279600	378800	198000	190100	191000	199800	211700	177600	220300	213000	177500	173600	151900	239700	703100	693300	649000
LPE 22:1	536.369	1.423	[M+H]+	43510	47870	66110	59970	60610	71970	67150	142600	97020	55580	72390	92570	46880	50900	69410	155700	33420	53840	41070	124100	88640	131200	166700	53060	34470	36680	39950	38230	31110	50370	77520	37780	39100	38530	42810	52930	35330	50360	42280	27760	36770	33720	38600	86560	94590	88330
LPE 22:3	532.341	1.216	[M+H]+	26690	30670	36710	31820	35560	37090	36680	85610	59450	33520	39180	32510	30480	33270	38430	27470	24450	30060	27950	60270	46820	67230	81700	37190	27960	32980	24210	27590	22190	36020	39810	25630	23580	24510	33160	27590	27580	30240	28380	24020	24320	27740	31550	52640	56880	52260
LPE 22:4	528.31	1.147	[M-H]-	340100	446000	465500	384200	538000	449100	447900	951600	712100	455600	506600	477700	383000	501400	530400	331100	272900	366100	316000	758700	514600	681100	1115000	563000	458700	569800	443800	403900	423000	547700	542500	484600	533300	433100	472900	446300	482400	449500	441300	343500	339600	363200	394200	931600	927300	700500
LPE 22:5	526.295	1.11	[M-H]-	46230	55610	57530	57530	66140	61090	66310	137600	98210	64110	61000	61080	55570	58740	65220	53750	38180	52790	45700	101200	88760	112600	142300	82520	49100	57150	58500	63110	54970	72980	93610	55140	58940	55160	57180	61080	52420	66810	64720	60260	49950	46240	64090	139600	141900	154300
LPE 22:6	524.278	1.053	[M-H]-	240600	308300	305400	347600	487700	367700	398900	942300	759000	370600	411500	386400	346000	411500	383600	328500	235400	422800	315900	821300	696000	808500	1184000	637900	362800	314700	462200	530500	408200	535500	878400	414100	426300	435200	420400	483300	312300	584500	545600	482400	408600	341700	632800	1417000	1476000	1588000
LPE O-16:1	436.285	1.221	[M-H]-	430700	361900	452800	435100	413300	345100	501000	235900	229900	425900	378000	418300	406900	392100	326800	454700	345800	432900	392100	436800	437600	431100	371400	442800	305200	268300	281500	292800	340100	297000	414200	305500	286800	284000	295000	329400	324100	351000	361400	263600	415900	293400	320000	350300	304400	297500
LPE O-16:2	436.283	1.151	[M+H]+	14280	14370	15050	16620	15530	12150	18300	12980	9909	18110	14620	17640	18680	17840	15030	12640	14090	16590	14860	16060	14890	13430	14580	20070	12790	15400	15480	16900	17890	15360	19310	17890	20960	15600	15150	18990	17740	19000	20040	12960	21990	15930	17140	21350	18820	18590
LPE O-18:1	464.315	1.357	[M-H]-	714500	615600	669000	710400	712700	569600	748900	422500	418000	744300	636500	746300	685000	669600	595500	672400	614500	765000	680300	744200	756000	679100	649800	888400	605800	558400	586000	630000	664000	585800	783700	623200	574900	616700	574800	662000	641700	691100	717000	570400	803000	574000	677500	724500	661500	685200
LPE O-18:2	462.298	1.242	[M-H]-	1450000	1269000	1421000	1460000	1407000	1105000	1799000	817800	819100	1528000	1224000	1470000	1426000	1358000	1178000	1353000	1228000	1544000	1382000	1492000	1550000	1289000	1247000	1851000	1102000	1066000	1080000	1065000	1301000	1066000	1621000	1170000	1140000	1089000	1045000	1294000	1278000	1325000	1474000	1039000	1679000	1131000	1262000	1417000	1203000	1072000
LPE O-20:2	492.343	1.373	[M+H]+	34080	35400	37760	37660	35470	30810	37790	25050	25320	38140	35290	38480	34670	34670	33310	37480	28060	41300	36480	42050	40470	35290	36720	47010	25840	29830	31720	30560	30880	30470	43760	29350	27470	31370	27350	31310	29450	36410	37020	25450	38090	30850	35910	40510	33860	31790
LPE O-26:7	564.347	1.818	[M-H]-	186100	183100	177300	192700	180900	189700	189100	214800	226300	186900	180700	195000	182500	197000	182300	198800	188200	188200	198000	192100	189300	184400	194900	200100	189600	207300	203400	190700	192400	197700	188200	203800	184900	196000	201400	195300	199900	184600	184800	194300	202300	200100	181600	204400	191100	189700
LPG 22:6	555.269	0.845	[M-H]-	44190	60150	37140	59850	61860	33240	72310	55530	42770	71530	36390	16240	46800	51450	28100	4184	35340	43960	41290	55430	68890	54810	58730	68880	38760	39080	45060	43840	45720	71260	67470	68830	44270	53650	46150	16670	39470	45950	59850	44980	43060	41880	44380	89740	69340	84350
MG 16:0	348.311	1.306	[M+NH4]+	2307	3063	3983	3732	5441	1584	2771	3767	6761	5420	3303	6919	3097	3060	4063	4254	2105	6279	2842	4263	4223	2262	3299	7802	2261	4639	6531	9165	3877	3663	10240	4053	6116	8018	5187	4168	3176	7412	7225	10360	4908	4998	7848	8827	9790	12530
MG 18:1	374.325	1.337	[M+NH4]+	16780	14020	17300	28160	30610	12130	16270	25300	42500	33240	23590	40790	22790	23570	19190	28710	14190	41930	21570	23880	35630	20850	22640	56020	24580	27840	54530	67370	22680	28070	66510	30370	44020	66860	35760	37650	33460	66830	45050	51740	36320	37230	47670	73180	102800	79720
MG 20:0	404.388	2.138	[M+NH4]+	87330	78420	85070	107500	90270	86150	88280	93030	88800	89750	91500	99420	80990	89560	84930	94330	84550	94100	97090	104700	101600	91520	85610	85130	77090	85670	77600	96220	82800	92830	78130	81520	76180	80400	83030	81940	69940	88230	95900	75530	91410	77030	98830	91940	86370	95040
MG 20:4	396.311	1.222	[M+NH4]+	36640	32850	32700	40110	42430	26120	34950	35180	55160	46240	37230	43770	32730	35720	34060	32390	18230	38340	27180	25830	37510	25020	25950	58250	28810	47110	56860	61260	31720	38160	55590	49030	68380	66790	49090	44830	43640	62410	41950	47950	40040	38070	44430	84860	114300	77700
MG 22:6	420.309	1.179	[M+NH4]+	26230	30450	24710	36220	52660	23540	27350	31980	39310	46710	38870	39480	31120	29640	32640	26750	18930	45730	24980	26130	32690	23800	25910	49200	28850	35500	45600	43810	34270	33160	50560	41730	51870	57170	46570	42130	33300	48740	47180	37010	42460	37400	39620	63620	68860	56180
NAE 13:0	258.241	1.115	[M+H]+	5345	2732	20920	2720	4397	24180	869	2681	2338	2881	27750	66750	2149	2093	37720	211900	3124	3435	1633	7657	1282	4609	1827	2227	800.7	2092	5156	1428	1255	3223	1484	1102	2283	1507	7847	32350	5068	4965	3804	13550	4609	13810	5873	3109	6790	2430
NAE 16:0	300.29	1.274	[M+H]+	69650	94420	94890	120200	147900	63340	77830	138600	167700	114800	101500	133600	91380	87250	87220	98050	70160	132000	74090	137700	133500	117800	99360	204100	98380	96190	162500	184900	111900	119800	220200	113700	107800	152900	107700	131300	86430	154200	143800	126600	123900	93390	170700	185900	181900	237300
NAE 16:1	298.274	1.184	[M+H]+	7853	9619	11040	10050	10670	8632	6738	11150	11130	9635	13370	17160	7923	7328	13270	24410	6225	10590	5159	14360	11150	8785	10710	14550	8647	8598	12180	15270	9216	11550	13900	8247	9221	14570	11110	14090	9126	14940	14110	20240	10800	11720	15190	17880	16790	21770
NAE 16:2	296.255	1.163	[M+H]+	18180	22780	114500	12840	24980	186400	7021	16010	23150	22180	196000	405900	18280	17040	266200	1111000	20630	23260	17130	54840	16680	32760	19280	15270	9518	16440	33380	15640	12650	13820	18540	15330	29550	24060	62020	252100	38280	23070	40180	38540	40360	33900	36220	27150	40390	27400
NAE 17:0	314.305	1.795	[M+H]+	422.3	1581	340.3	2417	873	521.7	436.4	2766	4435	6906	2443	6246	2865	4814	2561	3925	1790	6508	4748	8968	10470	5232	5201	3215	2970	3236	5667	9936	399.4	2417	12970	2799	3324	9583	3217	2855	3519	11820	16400	1292	1553	2419	3889	16360	25640	29260
NAE 17:1	312.29	1.593	[M+H]+	2469	4123	5167	4313	4040	3901	5156	9221	7277	3354	3712	2980	2693	2818	4629	3068	2476	2881	2465	12160	6727	11120	8157	5388	2554	2532	3064	5525	3435	4641	6854	1842	3401	3496	4060	2557	1701	4831	6849	25810	0	4105	4680	10610	11340	13420
NAE 17:2	310.272	1.239	[M+H]+	17230	11950	12530	10610	12630	9553	9238	17270	12400	10290	9822	6496	7687	6585	9485	9050	6135	10290	6654	7612	11420	11290	9767	18130	11600	10350	9640	17120	12380	25830	19980	8681	18180	14060	22470	21760	9676	17430	23150	10310	8967	12670	11830	16130	11500	22390
NAE 18:0	328.32	1.429	[M+H]+	30080	41760	40100	52220	54370	26100	28890	51380	55580	48540	41350	54520	40210	36930	41370	43110	33590	57730	34220	57250	53010	53550	46200	61780	30530	30780	52000	65110	39640	40170	65390	43110	40340	48790	31400	41040	29320	52530	52220	45620	47320	36930	49840	70980	71670	69930
NAE 18:1	326.305	1.299	[M+H]+	22160	35160	37760	39570	47240	19150	25640	30970	34230	32360	29130	47880	26450	23300	28380	32200	22660	41530	24110	50610	40740	39830	32460	47210	20720	30870	48620	48800	34360	34290	56470	27340	25290	36110	25390	35280	21450	42240	42890	36320	36470	28950	43620	62940	42590	69120
NAE 18:3	322.273	1.164	[M+H]+	29860	36590	34600	46850	58700	28830	28540	44220	56940	44950	42940	50680	37210	34430	41110	38210	27720	54870	33420	46860	51250	37450	39380	76880	42030	35250	63610	66970	45010	46320	73860	42450	52920	54400	44460	48910	31430	65750	56990	53480	51280	44290	65210	66170	64050	88240
NAE 19:0	342.337	1.361	[M+H]+	13990	15190	15370	18050	20180	11360	14990	16970	15590	16370	14950	16070	16750	14480	13660	11190	13240	17310	12750	16360	17940	13900	14840	19790	13320	13850	13840	16980	16220	15970	22300	14340	14160	13930	11650	17580	16530	19790	22520	26820	19330	13900	18850	22510	18340	20370
NAE 20:0	356.352	1.651	[M+H]+	40420	42220	42090	55290	45270	29920	29790	37680	30370	51190	37170	45680	43670	35600	34720	42460	30240	44100	43360	46190	40200	40810	40570	44010	26460	29610	26790	44030	33340	30440	31840	28220	32460	33410	31900	31820	31100	35530	47080	25970	36390	27690	40770	42500	30780	37490
NAE 20:1	354.336	1.259	[M+H]+	33120	33570	42430	31450	43040	25680	27300	44250	39890	34950	26880	29740	31240	16770	31860	24490	23020	40940	20350	26540	33580	30270	26220	34660	23670	24450	27140	45970	27510	43680	42580	13960	28300	36040	28260	26010	15770	38260	47580	25000	19240	36610	40890	43850	32180	38780
NAE 20:2	352.32	1.162	[M+H]+	25990	29870	47120	22500	43830	25570	24780	39210	34660	30870	23510	24040	24300	9478	29210	20260	20430	38660	16470	16520	32610	24270	23260	30240	24050	24700	26780	54360	26350	40310	48720	7556	28570	40830	29120	22990	12030	37240	52510	26260	11100	47150	45780	46130	25490	36370
NAE 20:5	346.274	1.106	[M+H]+	15130	20530	17710	25260	42300	14860	20950	25410	37460	35240	26570	35790	26310	25130	25020	29950	16450	45930	19720	32500	30560	24520	26090	52860	28880	21820	41230	45750	34150	30320	64030	30170	37040	48060	34020	32880	22470	47400	49040	42310	37400	33930	52250	49210	45630	66930
NAE 21:1	368.352	1.397	[M+H]+	53160	46030	51270	62570	59180	48650	49630	50940	50600	59400	47740	59380	57180	55180	46690	51030	44890	56470	50310	68210	67590	62190	55370	72040	41460	46030	51800	55530	51080	54970	63590	44700	53500	51470	48500	53260	48810	59750	64120	48880	60410	46250	58020	67560	59980	73820
NAE 22:1	382.367	1.663	[M+H]+	9098	8716	9170	14170	10440	7136	6541	5902	3585	11230	10920	12010	10330	9287	7988	10890	5080	11100	9900	13040	12410	7394	9052	7745	4099	5112	6158	6885	7625	6299	4650	6207	6847	6878	3980	6917	6409	7414	8176	4138	11640	6576	7062	7212	6567	7318
NAE 22:5	374.301	1.171	[M+H]+	16380	15010	20650	10610	20020	15030	12620	21720	19530	15900	12070	12010	12960	6848	11960	5607	9087	18530	8932	10080	15700	15140	12110	18390	12720	14220	15160	24700	13930	22230	25420	6923	17380	23210	17140	11770	8806	18950	24210	17080	10310	22990	23100	20900	16090	21050
NAE 24:0	412.417	2.289	[M+H]+	37470	35610	37060	40830	36190	26640	14420	41040	38470	41650	27420	39190	38760	41110	34090	36270	36700	48440	43920	44320	38870	32100	28460	40340	30760	26330	28690	32680	33830	32430	14510	27360	27130	28030	22890	35230	34620	37550	38180	29380	39460	35310	39780	30230	21860	23570
NAE 24:1	410.399	1.934	[M+H]+	44260	38640	46120	60390	50930	35760	26060	39280	36820	51890	37320	60410	53910	46710	43200	51040	38370	56340	51900	48210	48540	43590	45010	61650	30560	29370	39580	42710	44010	34940	25550	39080	36550	37160	28870	41840	40150	47090	52150	30120	54160	38060	46530	46920	30660	34790
NAE 26:1	438.43	2.282	[M+H]+	17480	14350	18780	19570	22300	13730	7580	21420	18210	18970	13130	21290	19300	23760	16420	19420	17510	23430	23420	22380	17590	17690	14570	19490	12160	11000	16950	14140	15000	16150	8699	12480	14880	15630	12320	14330	17530	18570	20120	12210	20740	16540	19460	16940	11710	15370
NAE 6:0	160.133	0.86	[M+H]+	1868	7683	5613	8189	11600	6446	6746	12460	14170	5781	4783	8410	6148	8761	8308	4962	9304	8620	6284	9903	14100	4603	6934	4417	4047	7412	8605	3778	6731	17090	7570	9538	7922	3165	3943	5469	7442	7951	7510	4478	10030	10420	8172	15200	11310	7022
PC 28:0|PC 14:0_14:0	678.504	2.069	[M+H]+	1454000	1041000	1270000	1622000	1207000	1180000	1497000	1004000	840400	1482000	1075000	1300000	1365000	1120000	996000	1242000	986300	1320000	1238000	1469000	1356000	1805000	1325000	1069000	585200	677000	524400	667900	735100	733700	932400	582000	514500	604400	532200	672200	775400	756800	764000	421200	750200	615900	743900	696100	509300	917000
PC 28:6	688.391	1.164	[M+Na]+	6321	11900	11600	7271	10050	6219	7395	10730	9430	12120	13350	10330	9104	10850	13450	10100	3550	7716	5786	6174	5039	7235	6505	9419	9576	9816	12770	7865	8722	8029	7778	11690	13080	11100	13540	8557	8875	9553	8601	6271	5496	6879	7317	8995	8377	8442
PC 29:0|PC 14:0_15:0	692.519	2.228	[M+H]+	387700	381400	356100	402100	327200	349400	529800	295000	252400	393900	377700	334200	346700	344200	378900	326600	300500	423400	408400	394300	352800	482200	355400	270900	191900	223700	197500	169300	228400	207200	301400	184600	211300	175100	180800	262900	226200	221800	252500	158900	263800	193800	225000	183000	155700	240500
PC 30:0|PC 14:0_16:0	706.537	2.437	[M+H]+	11800000	9458000	10710000	11950000	10290000	10810000	12580000	10100000	8941000	12810000	10280000	10550000	11510000	10460000	8952000	10300000	10400000	12080000	10880000	11290000	11110000	13990000	10830000	8775000	7872000	8791000	7105000	9064000	8924000	8813000	8733000	7355000	7077000	7819000	7523000	8647000	9573000	9237000	8074000	6336000	8915000	8359000	8724000	7412000	7214000	9277000
PC 30:1|PC 14:0_16:1	704.519	2.139	[M+H]+	795800	624700	728500	870600	720300	568700	834700	548100	473300	887900	650300	804600	743600	695500	646900	635200	535700	775400	676300	753200	848400	863800	772300	783900	423800	482400	497800	555700	521800	533400	658300	445100	411400	492700	402800	496900	493900	507000	500300	347900	490600	426500	559600	523600	411300	711300
PC 30:2|PC 12:0_18:2	702.504	1.878	[M+H]+	20860	14860	22280	28070	20370	15260	24330	28490	23310	26250	14260	20020	22640	24210	19230	20510	17630	27240	19330	25370	23500	24770	25890	14280	12780	15090	10290	15640	12920	9705	16870	11040	9874	14490	9781	17010	14950	15030	16630	8837	17270	15650	21360	14400	11450	12540
PC 31:0	720.551	2.667	[M+H]+	2672000	2514000	2571000	2814000	2752000	2446000	3763000	2877000	2477000	2822000	2613000	2814000	2739000	2540000	2338000	2426000	2358000	2796000	2635000	2874000	2687000	3212000	2791000	2424000	2295000	2278000	2280000	2417000	2338000	2573000	3435000	2320000	2281000	2316000	2236000	2530000	2365000	2561000	2419000	1997000	2414000	2130000	2391000	2274000	2343000	2811000
PC 31:1|PC 15:0_16:1	718.532	2.292	[M+H]+	138100	123900	211800	198400	124800	115500	197300	132300	132800	164800	121600	131700	207900	117900	130900	227000	120600	205000	211300	144300	140900	164400	177900	131600	89680	106900	110300	81550	109300	105600	145600	97480	97480	96460	103200	134200	100700	108000	124200	80150	138800	101100	108300	103200	84330	138500
PC 32:0|PC 16:0_16:0	734.567	2.884	[M+H]+	56350000	61720000	57720000	56150000	58910000	65100000	61180000	70980000	64520000	60070000	60080000	58550000	61810000	61610000	57370000	57240000	64890000	64270000	58070000	58180000	56880000	60880000	60930000	42060000	62600000	66690000	58790000	63880000	60860000	67060000	58260000	60120000	60920000	61290000	65010000	61130000	63980000	61410000	55920000	60730000	58800000	63510000	58120000	47180000	54980000	45250000
PC 32:1|PC 16:0_16:1	732.552	2.51	[M+H]+	27520000	25600000	25650000	28830000	26480000	25120000	28750000	26190000	24240000	28490000	25350000	27320000	27420000	25870000	22930000	24930000	22720000	28110000	25240000	27540000	27630000	30410000	27100000	25490000	23230000	25640000	23920000	25130000	25310000	25560000	27270000	22680000	23150000	24140000	23280000	24570000	24430000	25570000	24230000	20830000	24550000	23100000	24770000	23360000	24080000	26530000
PC 32:2|PC 16:1_16:1	730.536	2.209	[M+H]+	677600	599200	639600	776300	693900	480200	1013000	623400	590800	928500	609800	909800	712400	735800	893900	595200	662800	910500	656200	728500	1003000	728900	844800	969900	528900	607800	735000	639200	645900	681000	1030000	609000	613400	714800	566800	795300	611400	831200	715900	613500	806600	711400	924700	818400	680400	1180000
PC 33:0|PC 16:0_17:0	748.58	3.204	[M+H]+	1428000	1494000	1454000	1469000	1484000	1642000	1782000	1750000	1536000	1533000	1457000	1438000	1474000	1476000	1395000	1452000	1588000	1649000	1538000	1530000	1350000	1734000	1517000	1102000	1410000	1451000	1316000	1410000	1389000	1497000	1654000	1323000	1293000	1376000	1370000	1499000	1475000	1486000	1338000	1313000	1320000	1498000	1326000	1225000	1148000	1315000
PC 33:1	746.566	2.754	[M+H]+	6310000	5788000	6347000	6612000	6266000	6104000	8190000	6505000	5554000	6490000	5596000	6545000	6477000	5941000	5499000	5995000	5413000	6647000	5739000	6818000	6147000	7260000	6099000	5668000	4809000	5595000	5261000	5116000	5701000	5842000	7490000	5257000	5116000	5343000	5121000	5402000	5568000	5987000	6113000	4388000	5770000	5354000	5518000	5430000	4892000	5309000
PC 33:2|PC 15:0_18:2	744.551	2.359	[M+H]+	49710	51960	56810	68610	55510	34800	69380	91960	26030	73500	65220	60880	56410	68750	66330	29660	76560	64420	74550	58390	70340	34570	31930	39770	32740	68860	38960	60810	26750	53160	62380	53830	45270	47290	39150	42550	87040	53740	29600	55170	92010	69780	66380	48910	38970	58980
PC 34:0|PC 16:0_18:0	762.598	3.465	[M+H]+	16320000	18400000	15910000	16390000	17940000	20750000	17550000	19840000	18710000	18670000	18200000	18510000	17330000	19400000	18100000	17230000	18640000	19100000	17440000	17710000	17280000	17590000	17870000	15370000	21090000	22800000	22420000	22740000	20640000	23220000	21790000	21480000	21280000	22730000	23420000	21260000	20510000	22110000	19360000	23260000	19770000	22500000	20930000	18690000	21480000	20920000
PC 34:1|PC 16:0_18:1	760.584	2.995	[M+H]+	66800000	71810000	70960000	62210000	61630000	101500000	71310000	88990000	84190000	67340000	63940000	62640000	68990000	74790000	61940000	77930000	97960000	77560000	74010000	66620000	61640000	76740000	65740000	39920000	71790000	80210000	59240000	63870000	63680000	68700000	58060000	59220000	62690000	61050000	69060000	61980000	73990000	66650000	59650000	65600000	61340000	81100000	59710000	47440000	48190000	42090000
PC 34:2|PC 16:0_18:2	758.568	2.598	[M+H]+	17040000	18240000	17770000	21550000	20160000	18180000	21530000	20860000	19180000	21850000	18190000	24360000	21750000	22610000	22620000	22510000	22300000	28610000	23800000	22520000	23710000	22240000	22010000	19250000	18520000	19260000	20630000	21650000	21360000	22070000	26160000	21420000	21980000	21670000	20390000	24400000	22920000	28210000	25690000	23480000	29050000	28240000	28960000	23480000	22050000	24490000
PC 34:3	756.551	2.257	[M+H]+	600500	651600	741400	1103000	915700	573000	1349000	1261000	972900	1321000	819600	1516000	1080000	1141000	1481000	949200	1053000	1612000	1105000	849400	1176000	918900	948200	1078000	622400	772300	989400	1045000	943400	985300	1807000	1077000	987900	1126000	958400	1476000	1125000	1505000	1302000	1037000	1519000	1413000	1803000	1194000	930800	1536000
PC 34:4|PC 14:0_20:4	754.536	2.15	[M+H]+	280200	247700	252400	310100	306500	198200	366400	247200	215000	341800	243300	365900	308900	292900	414200	232300	229400	310000	274600	301900	421100	310700	362900	437100	240200	241400	311700	261400	270100	305800	381700	270700	250000	272800	237500	308000	267300	330100	301600	216900	279000	270300	422800	371400	282700	487000
PC 35:0	776.622	3.859	[M+H]+	1233000	1218000	1215000	1382000	1332000	1346000	1180000	1482000	1306000	1392000	1308000	1339000	1314000	1244000	1154000	1264000	1180000	1450000	1309000	1319000	1202000	1601000	1282000	1117000	1039000	1030000	1021000	1158000	1132000	1214000	1110000	1094000	1012000	1128000	1066000	1137000	1115000	1270000	1191000	933100	1198000	1133000	1173000	1070000	1002000	1185000
PC 35:1	774.599	3.295	[M+H]+	6558000	6927000	7027000	7040000	6573000	8410000	8051000	8149000	7086000	7267000	6483000	7040000	7140000	7166000	6353000	7510000	7852000	7782000	7234000	7409000	6906000	8071000	6848000	5305000	6030000	6595000	5744000	6013000	6325000	6902000	7245000	5920000	5894000	6085000	6061000	5902000	6769000	6858000	6497000	5334000	6295000	7211000	6304000	5565000	4915000	5149000
PC 35:2	772.583	2.815	[M+H]+	615900	591400	630800	636500	570800	611800	714600	641500	562700	654400	551400	651700	630900	595400	588300	676700	634600	738800	635100	714200	605700	680200	589900	533600	501700	603900	549200	528300	588700	591500	770100	531200	559800	551200	509200	576200	616300	649000	668900	494100	680700	647400	584600	567900	481200	449900
PC 36:0|PC 18:0_18:0	790.626	4.04	[M+H]+	1742000	1714000	1519000	1803000	1908000	1900000	1715000	1741000	1439000	2046000	1899000	1816000	1729000	1835000	1697000	1758000	1673000	2012000	1764000	1916000	1844000	2018000	1822000	1872000	1820000	1588000	1887000	2117000	1840000	2080000	2015000	1981000	1888000	1976000	1910000	1752000	1783000	2041000	1823000	1765000	1885000	1763000	1724000	1984000	2040000	2405000
PC 36:1	788.616	3.583	[M+H]+	52720000	55600000	54110000	50780000	50100000	70370000	53560000	65180000	65480000	54920000	51390000	52520000	55260000	58210000	51830000	59330000	67030000	59180000	55860000	53060000	51160000	55060000	51960000	38910000	57940000	63600000	53640000	55030000	53920000	59830000	53900000	52420000	54250000	55930000	59040000	53200000	59260000	59490000	53220000	54620000	52050000	66110000	55820000	43980000	46020000	44960000
PC 36:2|PC 18:1_18:1	786.595	3.149	[M+H]+	12750000	13580000	13750000	12800000	12580000	18130000	14090000	15880000	14770000	13400000	12350000	12770000	13200000	14070000	12410000	15360000	17100000	15650000	14710000	13450000	12260000	15600000	12860000	9269000	13150000	15040000	12040000	12660000	12510000	13660000	12980000	11480000	12270000	12450000	13130000	12610000	13800000	13990000	12190000	12680000	12400000	16540000	12480000	11260000	10400000	10070000
PC 36:3|PC 18:1_18:2	784.585	2.709	[M+H]+	13770000	14760000	14240000	17340000	16700000	14850000	15650000	17250000	15720000	17920000	15320000	19280000	17900000	17910000	17250000	17060000	16640000	20870000	17510000	17600000	19010000	17590000	17300000	16260000	14950000	15910000	17620000	18050000	17000000	18790000	18430000	17080000	16920000	18260000	17200000	18390000	17840000	21420000	19620000	17550000	21030000	19840000	22050000	19460000	18350000	20520000
PC 36:4|PC 16:0_20:4	782.565	2.551	[M+H]+	37790000	42150000	36080000	41670000	42230000	36210000	40250000	42710000	40770000	44470000	40750000	44640000	42210000	41090000	43260000	36510000	34260000	44190000	38220000	40560000	47210000	39720000	44430000	39350000	39500000	39560000	42570000	42230000	39660000	43890000	41270000	40990000	41290000	43730000	41840000	40840000	37450000	44960000	41450000	38490000	40710000	37410000	43910000	42870000	43420000	48300000
PC 36:5	780.551	2.227	[M+H]+	2327000	2070000	1984000	2439000	2318000	1514000	2734000	2279000	2151000	3038000	2325000	2798000	2320000	2197000	2659000	1826000	1626000	2436000	1933000	2250000	3082000	2244000	2511000	3707000	2208000	1992000	2676000	2184000	1988000	2365000	3249000	2206000	2145000	2636000	2265000	2464000	1968000	2639000	2299000	1908000	2224000	1893000	3046000	3027000	2466000	5646000
PC 36:6|PC 14:0_22:6	778.538	2.019	[M+H]+	320100	283800	313300	404000	375500	250100	368300	361000	291900	407400	368700	457800	369800	323500	472600	296100	246700	346000	297100	356800	487500	353000	392100	479100	266600	239800	365800	354200	338000	380900	465500	369000	331400	382400	325300	345900	273200	353100	359000	299300	334600	276800	433400	473200	410100	698800
PC 36:7	776.522	1.784	[M+H]+	7768	8138	7028	11420	6016	9104	12990	4975	3685	9326	7325	13710	12300	9713	11180	13030	5300	10410	13820	13640	10150	12350	14190	13420	6037	7584	10120	13190	7882	9841	11270	9718	6852	7681	7951	7337	11460	10450	8785	5141	8045	4184	13070	17810	8333	18360
PC 37:0|PC 16:0_21:0	804.645	4.333	[M+H]+	183600	194400	190300	225700	214300	174700	170900	206800	166300	238400	195300	213400	187900	195800	172400	187900	141800	232700	209500	232800	211200	216900	197500	231000	152600	135900	148200	170400	179000	198800	165200	163800	158000	185100	158300	165300	169800	195300	205300	134000	208500	160500	177800	210900	170000	198800
PC 37:1	802.633	3.863	[M+H]+	2510000	2600000	2616000	2855000	2652000	2697000	2862000	2810000	2529000	2871000	2442000	2799000	2687000	2649000	2371000	2625000	2368000	2938000	2603000	2871000	2665000	2951000	2539000	2511000	2129000	2366000	2315000	2368000	2382000	2574000	2839000	2259000	2227000	2442000	2247000	2271000	2345000	2755000	2729000	1903000	2574000	2489000	2517000	2409000	2162000	2445000
PC 37:2|PC 19:0_18:2	800.612	3.383	[M+H]+	442200	485500	498800	505500	445100	585000	570700	532600	518100	496600	426100	465400	481800	479600	430200	563300	554900	574300	519400	502800	432300	561700	453400	354200	401700	433000	368700	365700	411400	438900	483300	386000	376600	385500	387400	376400	444800	453900	442300	313900	421700	491200	418200	353900	273700	279700
PC 37:4|PC 17:0_20:4	796.58	2.8	[M+H]+	461700	487700	489900	487300	530100	450200	616200	566800	496400	597200	494700	623700	550300	525500	590000	487700	460100	583400	479500	577800	560200	493700	539800	540900	447000	550900	560300	503100	514400	574300	726600	552100	532900	562800	546600	558000	526100	590800	608200	489400	563600	519700	632400	610800	529300	644500
PC 37:6|PC 15:0_22:6	792.552	2.193	[M+H]+	443600	512600	471500	563000	586900	384500	585200	421400	383400	553600	528700	659800	520600	508300	697900	567400	397700	524700	487100	484000	524100	481700	513400	679400	489000	453700	614700	505800	521400	574800	807500	598600	591500	584000	556900	573500	484000	590900	632700	513900	562500	485700	640700	647300	559100	804100
PC 38:1	816.642	4.079	[M+H]+	13010000	13360000	13080000	14190000	13940000	14560000	12770000	16180000	15480000	14640000	13470000	14180000	13650000	13890000	12930000	14090000	12940000	15360000	13330000	14590000	14230000	15410000	13200000	13750000	12150000	13990000	13080000	13200000	13160000	14490000	13790000	12290000	12820000	13750000	13540000	12460000	13510000	15720000	15030000	10890000	13410000	14790000	14040000	12890000	12800000	16440000
PC 38:2|PC 18:1_20:1	814.629	3.659	[M+H]+	5681000	5563000	5960000	5657000	5272000	7510000	5877000	6117000	5975000	5691000	5133000	5310000	5766000	5723000	5021000	6539000	6708000	6403000	6067000	5513000	5065000	6617000	5304000	3696000	4824000	5108000	4448000	4701000	4886000	5055000	4847000	4352000	4552000	4550000	5048000	4486000	5055000	5469000	4892000	4219000	4708000	6039000	4512000	3796000	3762000	3757000
PC 38:3|PC 18:0_20:3	812.612	3.285	[M+H]+	2402000	2645000	2634000	2653000	2608000	3155000	2648000	3197000	2985000	3008000	2570000	2913000	2708000	2887000	2697000	2815000	3091000	3118000	2755000	2804000	2894000	3070000	2769000	2542000	2850000	3329000	3111000	3165000	2935000	3339000	2955000	2876000	2936000	3170000	3227000	2905000	3219000	3376000	3071000	2842000	2995000	3437000	3358000	3054000	2855000	3462000
PC 38:4|PC 18:0_20:4	810.598	3.121	[M+H]+	8297000	9421000	8889000	8861000	9404000	9931000	9560000	11480000	11020000	10330000	9076000	10320000	9608000	9846000	9924000	9317000	9700000	10100000	9122000	9489000	10040000	9434000	9640000	8954000	10250000	11690000	11720000	11480000	10180000	11540000	10710000	10300000	11010000	11600000	12140000	10560000	10560000	11930000	10680000	10780000	10340000	11320000	11380000	11250000	11110000	11820000
PC 38:5	808.582	2.653	[M+H]+	33130000	35210000	33030000	36840000	37380000	32180000	33990000	36370000	34050000	37810000	35560000	39150000	35850000	35660000	35850000	32950000	28600000	35110000	32650000	35810000	37360000	34480000	34220000	37400000	34290000	33620000	39620000	38570000	35420000	39420000	39530000	36780000	37580000	40440000	37370000	35030000	32770000	40120000	38100000	33780000	36200000	31490000	36630000	40290000	39490000	41870000
PC 38:6|PC 16:0_22:6	806.568	2.379	[M+H]+	109800000	119200000	104000000	121700000	121600000	103400000	110400000	116200000	107900000	121500000	119000000	124300000	116000000	113500000	119100000	107800000	95420000	117900000	108800000	119400000	125600000	110700000	116400000	126300000	117000000	104500000	130700000	125700000	121400000	132200000	129400000	129100000	123500000	131500000	121900000	119500000	106900000	133600000	133600000	119300000	126000000	112100000	126100000	135100000	132100000	136900000
PC 38:7	804.552	2.096	[M+H]+	1857000	1918000	1749000	2434000	2425000	1474000	2288000	1828000	1639000	2395000	2196000	2660000	2156000	1898000	2727000	1641000	1365000	2004000	1755000	1956000	2657000	1951000	2296000	3307000	1913000	1498000	2613000	2153000	2097000	2570000	3226000	2445000	2198000	2719000	2115000	2361000	1607000	2357000	2335000	2013000	2005000	1647000	2517000	2905000	2756000	4744000
PC 39:1|PC 21:0_18:1	830.661	4.45	[M+H]+	763400	785900	791900	910100	922800	657300	723900	761500	691600	1018000	842600	1091000	807000	877100	770400	773800	544900	955400	750800	1000000	972900	861400	831400	1236000	689900	636800	791000	800800	843000	967400	912600	807300	861500	949900	751500	783000	744000	1043000	988800	609800	939400	787500	842300	1053000	873900	932500
PC 39:2	828.644	3.894	[M+H]+	290800	286900	306900	328300	304300	310600	385900	341400	307100	329800	284300	341900	300000	296100	276100	315100	280500	348700	312500	325100	305600	347800	300600	294400	256600	260800	261200	261600	273500	310300	370300	272300	275700	278600	265200	276400	280100	320400	316900	226300	295200	302800	274800	271100	242300	264600
PC 39:4|PC 19:0_20:4	824.611	3.39	[M+H]+	48950	59100	50390	49100	48770	61360	57200	66350	63390	53890	46310	56790	50630	58340	49810	57090	54690	63400	57280	55990	48220	46930	55140	48090	52590	64940	50740	53160	53260	64230	57160	51250	53220	55860	59320	48820	55980	58040	53950	49800	54780	61100	62090	55450	38380	48090
PC 39:6	820.586	2.633	[M+H]+	764300	863100	759300	847200	887500	797200	917300	963200	856200	852100	840900	920700	808900	853900	843800	862400	720600	855000	814200	937500	811300	861600	861400	896100	961100	783000	1058000	897600	963100	999600	1388000	1055000	984400	988100	962800	844500	825300	1064000	1137000	948000	973800	880400	939800	1074000	1017000	936700
PC 39:7	818.565	2.258	[M+H]+	161300	169500	172700	208300	207600	144800	199700	198900	185100	197400	180900	228500	198600	175700	216700	172200	134600	193600	178300	207000	205200	175900	195800	251300	159100	140300	232800	173200	182400	215300	298100	221700	202100	230800	172300	182200	150500	217800	224600	180800	207600	150200	212500	255600	227300	281500
PC 40:0|PC 16:0_24:0	846.69	5.153	[M+H]+	132900	113700	111000	142700	153400	113300	121200	72460	59880	152200	133800	147500	130800	121900	121700	109300	94760	147800	124500	136100	138500	141100	134600	215300	149700	98400	121100	158100	162600	146000	132500	169700	141600	133300	119300	139100	130700	132700	147800	122200	175600	109400	137800	162500	148300	148700
PC 40:1	844.675	4.721	[M+H]+	5429000	5038000	5390000	7121000	6434000	4726000	4793000	4935000	4637000	7045000	5783000	7411000	5615000	5726000	5179000	5408000	4017000	7085000	5413000	6710000	6843000	7100000	5792000	8428000	4891000	4389000	5354000	5692000	6052000	6373000	5778000	5247000	5532000	5992000	5038000	5930000	5505000	6902000	7395000	4009000	6735000	5392000	6029000	7056000	6161000	7592000
PC 40:10	826.542	1.714	[M+H]+	20450	15560	20950	28270	17020	21080	18280	30840	16860	27870	22260	26650	25380	24300	21890	29800	18960	18440	21890	27290	20780	35320	23790	16090	16880	16960	15510	8186	18460	13140	16760	21290	21810	8130	20230	22960	22790	14890	8599	4133	18660	13260	9441	20160	16280	25750
PC 40:2|PC 20:1_20:1	842.662	4.153	[M+H]+	3135000	3028000	3214000	3467000	3493000	3495000	3040000	3982000	3935000	3513000	3033000	3872000	3221000	3391000	2971000	3417000	3071000	3732000	3059000	3501000	3351000	3874000	3048000	3562000	2963000	3269000	3230000	3181000	3438000	3565000	3257000	2977000	3285000	3403000	3250000	3400000	3332000	4005000	3898000	2665000	3558000	3893000	3506000	3231000	3168000	3872000
PC 40:4|PC 18:0_22:4	838.629	3.447	[M+H]+	1085000	1228000	1164000	1083000	1078000	1336000	1108000	1431000	1429000	1345000	1141000	1339000	1165000	1308000	1242000	1560000	1280000	1304000	1147000	1214000	1261000	1113000	1202000	1285000	1487000	1696000	1655000	1498000	1380000	1579000	1296000	1488000	1523000	1543000	1791000	1467000	1544000	1759000	1672000	1343000	1357000	1730000	1771000	1393000	1451000	1445000
PC 40:6	834.599	2.86	[M+H]+	21690000	25360000	23140000	23780000	23050000	25870000	22000000	26450000	24480000	23340000	23420000	23640000	23840000	24580000	23040000	26040000	23330000	25290000	23640000	25410000	22630000	24020000	23180000	20650000	25730000	25980000	28150000	26350000	26840000	26920000	26800000	28140000	27330000	25780000	29150000	23560000	25790000	29730000	30810000	26960000	26930000	30030000	26370000	25520000	25790000	25420000
PC 40:7	832.584	2.464	[M+H]+	17510000	19490000	17630000	20310000	19780000	17590000	17770000	18850000	17750000	19670000	19640000	20350000	19310000	19280000	19400000	19240000	16520000	20170000	19330000	20120000	19370000	18640000	18790000	19780000	19500000	19150000	23450000	23190000	21760000	22170000	22460000	22450000	22600000	22210000	21320000	20470000	19340000	24510000	24160000	22340000	22890000	21150000	22180000	24450000	24180000	24060000
PC 40:8|PC 18:2_22:6	830.567	2.151	[M+H]+	2068000	2555000	2436000	3715000	3422000	2279000	3207000	2799000	2515000	3530000	2929000	4980000	3815000	3895000	5354000	3674000	3223000	5025000	4067000	2945000	3438000	2724000	3074000	3670000	2482000	2324000	3713000	3635000	3631000	4001000	4954000	4250000	4025000	4055000	3236000	5125000	3703000	5376000	5398000	4663000	5856000	5086000	6499000	4424000	3635000	5884000
PC 40:9	850.53	1.923	[M+Na]+	23140	35440	33280	25400	26730	21230	25080	25340	16610	29630	38360	36810	29070	30340	41410	27300	21520	33360	28280	27480	30910	29510	33240	31920	27600	34780	42900	35800	33670	37210	27790	35920	37780	34910	39520	31130	24950	39470	40430	37530	36360	33560	35610	40740	41310	44740
PC 41:1	858.69	4.999	[M+H]+	765500	728000	725900	812900	982500	594400	630100	745100	731200	970500	837500	1087000	757900	820900	793000	684000	521300	878100	700400	929900	970100	715100	807000	1365000	813000	701000	954400	819600	954000	1066000	873800	912600	968200	1040000	880200	941700	801400	1092000	1197000	784000	1082000	920500	1153000	1187000	914800	992800
PC 41:2	856.675	4.433	[M+H]+	432100	462400	440200	526800	543800	370800	412900	442300	435300	573900	481800	710900	446700	520700	461900	423500	314500	532000	401400	583600	555800	441000	466400	853000	446000	425900	549300	548600	568600	626200	638200	534800	616500	651100	502600	601000	489400	706000	697400	439700	628200	536300	540100	780900	639400	591100
PC 41:3	854.662	3.989	[M+H]+	16870	16780	15530	16570	22250	16120	20600	21490	21660	21610	15120	22720	16700	16730	17260	17760	17710	21240	18740	21290	23000	19660	19150	22270	21910	18320	23950	20390	26540	23620	33500	27260	28030	27920	24640	25820	22900	27820	25820	20860	25880	29860	23500	27320	25350	22760
PC 41:6	848.616	3.198	[M+H]+	18980	23070	17830	18740	17400	24550	21180	26070	23600	18630	18430	20080	19600	20440	22220	25470	23980	20400	19820	22590	18580	21750	20130	19630	23300	25880	27020	23370	27940	27810	29120	26670	27300	27580	25330	24990	28900	32410	28880	27600	24250	34720	25640	27130	21570	24670
PC 41:7	846.598	2.689	[M+H]+	89660	98160	97020	97800	110600	101000	104400	99190	83950	98220	94490	108000	99110	103900	102800	104000	92520	103400	98760	113900	92870	100000	107900	105000	107800	107300	121100	112400	110300	105500	146500	130600	119300	110500	109300	99480	107400	135100	127800	105400	115900	116700	104900	125300	111400	92930
PC 41:8	844.584	2.277	[M+H]+	66770	57700	67750	78480	57370	55850	65320	75730	64920	64580	62480	56770	61300	62480	55860	56830	48730	63450	63260	69260	61410	65830	67580	51090	37380	50870	46700	47510	42240	43620	42650	45650	41450	42870	41450	42480	49430	49390	47990	34450	52520	45320	36830	46420	46970	38710
PC 42:0|PC 16:0_26:0	874.719	5.648	[M+H]+	31300	24800	28550	34740	37620	24200	24260	15940	13430	36930	32830	34470	29470	29770	31070	27040	24540	35270	33730	29460	34920	31890	34360	44990	34180	19620	34390	35210	38030	34040	27320	43620	32020	29040	26590	30910	29590	29490	35720	33250	38500	23450	29000	40700	36930	29080
PC 42:1|PC 24:0_18:1	872.708	5.258	[M+H]+	3311000	2959000	3235000	3933000	3860000	2785000	2952000	2951000	2784000	4143000	3273000	4323000	3364000	3389000	3280000	3037000	2650000	3950000	3256000	3930000	4304000	3708000	3484000	5439000	3435000	2888000	3816000	3515000	4123000	4202000	3594000	3696000	3657000	3746000	3479000	4051000	3576000	4384000	5146000	2879000	4308000	3637000	4384000	4543000	3778000	4727000
PC 42:10|PC 20:4_22:6	854.569	2.091	[M+H]+	2718000	2998000	2622000	3264000	3642000	2268000	2939000	2584000	2533000	3593000	3277000	4073000	3358000	3177000	3580000	2748000	2138000	3193000	2858000	3420000	4005000	2795000	3529000	5553000	3247000	3609000	4736000	3818000	3741000	4168000	4440000	4001000	3953000	4354000	3833000	4113000	3365000	4395000	4543000	3782000	4343000	3181000	5061000	5785000	5400000	8246000
PC 42:2	870.695	4.695	[M+H]+	3695000	3316000	3636000	4922000	4445000	3163000	3148000	3507000	3367000	4783000	3716000	5375000	3689000	3971000	3462000	3676000	2615000	4767000	3536000	4641000	4739000	4663000	3814000	6243000	3504000	2874000	3944000	4099000	4388000	4563000	4217000	3826000	4111000	4449000	3504000	4308000	3739000	5167000	5578000	2867000	4700000	3918000	4243000	5373000	4542000	5271000
PC 42:4	866.66	3.876	[M+H]+	115100	119600	124000	125900	128300	130600	129400	144900	142400	171300	119400	165000	132300	134600	135600	127700	114500	155500	121400	136300	179700	141100	138500	183800	159200	159200	177700	156600	156300	173800	160400	160500	172000	170000	181100	191800	161700	205600	190900	138700	167200	176500	184700	185200	186300	242400
PC 42:5	864.644	3.42	[M+H]+	146800	151200	160100	144000	144800	186300	149600	172100	189200	165200	139300	176000	150000	169000	147200	176500	167100	178500	163800	160700	151900	172100	153700	139800	163900	166400	168500	160000	160600	175800	160200	154100	157600	169000	170500	168500	170000	183300	177800	150500	153300	182000	166800	156300	142000	152400
PC 42:7-1	860.615	2.763	[M+H]+	651500	702500	746100	691400	620200	885400	656100	804800	695000	677100	648700	674000	723800	746000	638700	814400	804300	764900	755500	749800	622900	792200	650200	515400	711800	749700	703700	707500	716900	725400	685700	768500	693600	677900	759400	589300	832000	832400	851800	664500	781100	911800	729500	611100	595200	477700
PC 42:8	858.599	2.497	[M+H]+	562300	676700	565200	669300	671300	601000	588700	586700	553200	661800	619800	719600	663000	673400	676200	679900	590900	761200	676100	751300	689000	666000	695600	778300	726100	669500	876000	773400	812200	811800	830000	890500	846500	781400	861200	776300	761900	1002000	1003000	800100	856400	920800	954900	953500	920100	895400
PC 42:9	856.584	2.226	[M+H]+	867600	908300	834600	1085000	1138000	711300	902000	984600	920500	1125000	973900	1241000	986800	992500	1064000	833500	690000	999400	898800	1128000	1255000	951000	1075000	1833000	1084000	1152000	1589000	1244000	1264000	1317000	1452000	1315000	1266000	1436000	1249000	1301000	1137000	1528000	1525000	1243000	1433000	1081000	1704000	1942000	1774000	2699000
PC 43:10|PC 21:4_22:6	868.583	2.806	[M+H]+	51470	60640	49120	51560	55280	55890	48600	46820	49780	51990	52880	59860	52240	55280	54160	59070	61630	62540	56890	54750	51900	57460	56290	55200	62990	63060	69590	73260	63500	67380	58060	69930	70380	63590	74620	63840	55960	80940	84360	61980	64150	76230	61410	61310	64110	42570
PC 43:2	884.707	4.966	[M+H]+	113400	108400	113900	127600	146300	90020	102300	114300	106200	145100	118200	170600	114000	124200	119700	106100	79010	132000	106100	142600	152500	110700	118900	202300	111200	92810	132100	109800	135700	150200	140100	124600	135300	151200	121500	133600	106200	160100	180000	108200	141400	126200	145500	174000	130000	133000
PC 43:4	880.677	4.558	[M+H]+	50540	44800	41060	50930	55230	41230	35150	47510	46780	57670	49980	74240	45880	50150	43380	50610	34760	59050	42340	61210	53690	46380	51990	92050	52730	37110	59530	52050	63280	67300	54880	59710	60680	69550	54810	65110	54770	73100	73020	44750	59810	49920	63270	71150	54980	70400
PC 43:5|PC 23:1_20:4	878.654	3.97	[M+H]+	21380	25170	20100	23300	27700	18090	19790	27620	23960	26060	26950	32110	23640	25180	22850	20890	18250	28740	19780	27510	24110	21360	23800	29720	24210	26140	30390	31710	25620	32970	33900	31650	33310	32030	29170	30810	25880	34350	29400	28050	26630	25150	26130	36920	27680	28900
PC 43:9	870.591	2.132	[M+H]+	48390	62150	54770	51050	49450	54630	56710	23090	19470	57520	57980	60360	61780	60940	62850	58720	52810	51430	60140	46200	49240	53800	60370	57410	77260	66200	71210	76800	65580	72770	61530	88610	69780	67510	75040	82000	64170	64270	58220	83350	73080	69120	65200	67900	73550	57890
PC 44:1|PC 26:0_18:1	900.738	5.749	[M+H]+	431600	350100	409100	545900	475500	317800	296700	353000	328600	470000	374600	503800	414500	396700	385000	371800	304900	477800	422200	472200	513200	453400	421400	609600	380200	265000	417500	393400	437400	462000	360200	428200	386800	395000	358000	419500	337100	475500	594900	303100	428000	347700	473400	514800	403500	469400
PC 44:12|PC 22:6_22:6	878.566	1.97	[M+H]+	12120000	12840000	11920000	15150000	14680000	10890000	12000000	9096000	7728000	14420000	13680000	14920000	12860000	12020000	12890000	12410000	8448000	13410000	12470000	15100000	15140000	13000000	13970000	21400000	12180000	10640000	16320000	13790000	14630000	15830000	17220000	16390000	14810000	15650000	14250000	12990000	11500000	16270000	18710000	13160000	15220000	12360000	15650000	20880000	17730000	21900000
PC 44:2	898.723	5.224	[M+H]+	715800	595600	722000	883900	810200	580100	555700	601100	566500	828200	650200	867500	706800	696100	640800	644700	491400	820800	677900	837600	835600	835700	681300	1007000	585100	426600	673700	648200	710100	740800	639700	633000	666100	686600	590200	653400	543300	809600	917700	487900	721300	613700	706800	822900	694900	789100
PC 44:4|PC 24:0_20:4	894.692	4.832	[M+H]+	177200	147200	159800	207100	201100	151400	133900	183300	168000	216100	169200	241700	170900	176300	163500	165600	126300	218700	164100	215300	227400	214400	174500	309700	185600	128500	188400	159800	204900	214700	174300	191400	200000	205400	179000	208700	175400	231600	272800	137100	211300	187900	220000	242400	186800	264600
PC 44:7	888.644	3.475	[M+H]+	13470	16180	14910	15540	14330	22080	13710	22280	24360	16760	16010	24050	16040	20690	17990	20180	20040	18740	15630	21070	18800	20000	15140	13730	16600	16270	14590	19570	22750	25060	16870	16880	22700	21870	20600	14430	23510	22950	20100	17100	20290	18390	21340	16040	18470	14620
PC 45:4|PC 25:0_20:4-1	908.704	5.509	[M+H]+	53050	47300	49490	62450	67550	39080	42000	47980	45280	58200	50950	66130	48300	49470	55010	44130	31480	59840	48450	59510	65490	44550	56150	82650	49990	36410	61500	50500	54130	62080	58130	57670	54540	56950	52510	50780	47090	65860	71320	40770	51500	46710	65050	63610	49050	59160
PC 46:10	910.636	2.72	[M+H]+	19240	21380	19910	20690	25170	19690	19440	29590	23240	23010	22190	28410	21080	23800	20440	21430	16860	23360	18890	22130	28320	20560	20090	34140	31390	26840	39000	28410	35650	32430	34980	40850	33260	31010	34860	38370	30840	45620	46690	31240	32380	28040	30220	39210	39900	37230
PC 46:12	928.579	2.169	[M+Na]+	558100	722200	702500	548900	526600	625400	578900	97600	113800	652000	659400	642300	615500	677800	730100	632000	535300	666200	755600	561300	536000	605300	738000	424200	680400	607700	626500	628900	679500	723600	795100	703700	694200	591000	645900	623300	566100	680500	700800	652600	617200	698500	566500	564400	652400	408300
PC 46:2	926.757	5.697	[M+H]+	79630	63530	71790	95910	83280	60430	49310	63630	66580	82470	65310	86000	72380	69620	62590	70360	53670	83320	68450	83640	80080	87050	67800	98710	61800	47010	65390	65240	68470	74310	56040	71090	64320	67800	60440	60530	54020	78170	91670	52060	68980	57980	66590	88680	70080	75830
PC 46:4|PC 26:0_20:4	922.724	5.356	[M+H]+	51470	39420	45090	58060	54700	43920	35790	45490	42850	52860	41440	57060	48300	45890	40630	46080	39150	57890	42090	56940	57790	57500	45570	69930	43370	30360	48570	45250	49300	53290	41920	46630	45970	48250	41740	46860	41280	56870	61650	36230	48780	43180	54710	52100	41560	60620
PC 46:5	920.706	4.794	[M+H]+	63940	48800	59090	78790	73060	55160	45360	58680	53300	78430	59460	88020	59280	62710	57460	60100	41940	77880	60730	76810	72640	82600	60740	103200	57930	34720	59040	54020	63330	71230	60570	63100	62970	67170	55180	63320	49070	76840	84540	44230	63940	57660	64940	77040	62060	88710
PC 46:7	916.676	4.04	[M+H]+	3299	6069	3025	4756	4940	4460	2515	7584	10270	7012	5165	8196	3764	5765	4854	6965	3813	5525	4375	5898	5065	7494	3243	4940	6657	3292	6343	6161	5330	6859	5889	5513	8857	8377	6569	7315	4820	9016	10850	6738	9763	6367	7453	7430	6878	7988
PC 50:4	978.788	5.753	[M+H]+	1181	1603	1190	1098	1964	0	1472	1221	0	1367	1257	2811	2198	1167	1645	1547	1010	858.5	1060	2570	2845	1485	1221	4992	1349	1923	4100	3001	2828	2184	2152	3311	1777	3032	2553	2959	2135	3754	3721	2541	3316	1012	3109	4113	5406	7614
PC 50:6	974.755	4.986	[M+H]+	2216	2273	2026	2368	2701	1446	1707	1770	990.5	2774	2491	3149	2054	2533	2276	1655	1409	1382	1703	2582	2883	1874	2366	4033	1629	1418	3372	2849	2954	3431	4030	2966	2814	2869	2930	2618	1996	2818	3374	1956	3899	2502	3703	4253	4702	6397
PC 52:4	1006.82	6.198	[M+H]+	7449	7681	5894	10560	10970	5146	8294	5140	5418	11210	11120	13470	10340	9165	9958	5616	5479	9325	8717	9730	12650	7564	9482	17230	10610	12910	16810	15280	13700	12130	15590	16640	15020	15060	14330	15350	10250	14720	14370	13040	18320	9119	13570	27080	28000	35270
PC 52:6	1002.79	5.465	[M+H]+	13280	15630	11590	15640	19570	9614	14730	12850	10060	16450	15300	16050	15920	12700	13480	12350	9363	13540	12080	18440	18490	13720	15270	25220	13910	13370	20940	20110	16320	19690	24360	17730	17380	18800	19930	17410	13260	19210	20660	15170	19060	12800	17970	29190	27970	41240
PC 52:7	1000.77	5.085	[M+H]+	0	0	0	0	0	0	0	0	0	0	0	0	0	0	0	0	0	0	0	0	0	0	0	2523	209.6	416	1490	729.2	917.5	1111	1114	353	533	1036	1221	442.2	313.7	962.7	1179	918.5	1440	886.5	1091	2056	1519	3606
PC 54:5	1032.83	6.274	[M+H]+	14210	16550	14450	18140	18650	10750	14830	14990	13630	18920	17760	23380	16670	17240	16590	12040	9224	16780	12820	18200	21930	13440	19230	30260	16570	22670	29290	23660	20080	24860	21510	22950	24750	24590	23410	25830	16100	23470	26760	21040	27560	14710	23280	40010	41890	49300
PC 54:6	1030.82	5.922	[M+H]+	40360	41540	36470	45340	48260	31360	42300	32070	30820	47700	43200	51640	43420	39580	41280	34840	29560	43770	38930	43990	47260	37070	43880	59870	37770	40170	48740	49970	44230	46530	56770	50170	45110	47160	43920	50200	37880	47080	50550	45000	56090	34190	45160	72580	71010	84580
PC 54:7	1028.8	5.556	[M+H]+	6567	7306	5846	8672	10130	5127	7166	7354	9034	9866	9561	13790	9472	7833	8768	6692	5683	7005	5721	9961	12900	6952	8152	16230	8047	9433	14680	11230	10630	12820	14890	10880	12470	12550	12300	10670	7940	14060	13930	9210	12370	8169	13010	20410	22290	30040
PC 54:8	1026.78	5.464	[M+H]+	906.4	306.9	938.3	1095	1479	478.7	1009	536.1	1054	633.6	932.6	1152	1201	1095	1729	345.5	669.3	714.8	423.1	1613	1825	1261	1122	2471	1243	1919	2010	1973	1530	1017	1597	1141	1268	1239	1052	1794	1551	1260	1904	970.5	1287	562.9	1571	2791	3569	5096
PC 56:10	1050.79	5.171	[M+H]+	2196	2069	1417	2721	3592	812.2	3771	2171	1725	4249	2996	4803	2952	2615	3739	1721	302.4	1886	1159	2636	4101	2060	2501	7427	2730	2816	6340	4499	3505	4546	5971	3044	3664	5890	5068	5833	2674	5849	5574	4218	5044	2296	5672	7803	10020	15580
PC 56:12	1046.75	4.47	[M+H]+	561.2	563.5	307.4	732.9	407.2	397.5	265.8	665.2	216	374.3	567.9	626.8	607.3	905.5	344.3	283.7	237.3	406.5	409.4	619.4	1047	565.5	257.9	1989	472.1	339.1	890.5	776.7	352.2	1300	1771	592.4	965.9	1008	1145	734.1	434.7	1593	737.3	78.01	577.7	556.9	582.2	1656	2261	3564
PC 56:6	1058.85	6.357	[M+H]+	46020	43560	37850	50730	49420	36950	45530	42750	35970	54450	45250	55370	44410	43350	38180	39040	33650	44650	40400	47110	52620	35980	52410	53040	42460	38160	47790	50880	49850	46400	54260	55070	47560	49050	41260	51220	42830	43020	49030	50730	57370	33030	45540	70810	70600	63410
PC 56:7	1056.84	6.004	[M+H]+	11000	11310	9929	16950	16040	8333	10120	12280	12620	14060	12620	18410	13390	13450	12480	10410	5764	12290	10320	15760	17450	11860	13030	22820	11100	14540	19960	16860	16310	17780	18750	15900	16280	17990	15400	16770	10910	18110	17420	14570	19390	11530	16580	29570	28720	36050
PC 56:8	1054.82	5.928	[M+H]+	4714	5058	4124	6235	6586	2558	4396	5118	3988	6335	4803	8277	6539	5792	5702	4177	4006	4753	3395	4543	6815	3324	5674	12550	5714	5348	10180	8317	7101	8002	8544	8104	7058	9051	7099	9458	4285	7806	8632	7130	8679	5417	9286	14900	14080	20020
PC 56:9	1052.8	5.54	[M+H]+	1017	1625	452.5	1647	1881	7790	1077	1773	724.8	1175	1411	1520	490.8	1752	2275	345.4	569.7	589.1	1284	2100	1760	608	1054	3325	407.1	492.2	2952	2777	1396	1988	3019	1585	1482	2831	1685	2837	1094	3055	3046	2259	3254	954	2682	6001	5722	9250
PC 58:12	1074.78	4.988	[M+H]+	5841	7152	6002	6604	8259	5236	7190	6924	6064	7586	8706	9789	7053	6886	8230	5269	4285	4964	5790	8482	9211	6482	7613	11790	7299	6256	10740	8910	9507	9448	13320	9311	8207	9624	10790	8767	7390	11430	12330	9825	10260	7561	10950	16290	13360	24540
PC 58:6	1086.88	6.819	[M+H]+	104100	108100	97990	114900	106500	101800	111600	141600	141500	120100	105400	114800	115000	107300	90610	102800	88930	120500	108400	115800	114500	85800	117200	118400	104100	111700	86830	120100	115300	105700	115600	130200	116700	101600	88280	124000	122300	95340	99880	115100	148800	79560	90040	164600	148800	84020
PC 58:7	1084.86	6.441	[M+H]+	26720	31160	25210	29510	28330	22030	29840	26280	22780	33620	29930	36250	28860	25370	25590	25990	19370	31210	28900	33190	32180	23490	30140	34020	23010	29070	30190	33510	30240	30800	36960	30830	28310	30200	27880	29710	26320	30450	33880	25810	35610	25910	27850	45760	41270	41460
PC 58:8	1082.85	6.354	[M+H]+	4028	4880	4420	6264	6603	3227	5248	4428	3862	7534	5345	8346	7099	4231	4839	4189	2893	3928	4746	8214	8763	3488	5626	9692	5608	6352	8021	8075	6766	8629	7575	8163	6384	8412	7293	9675	3481	6420	7423	6476	9117	4645	7199	16540	12610	16570
PC 58:9	1080.83	5.986	[M+H]+	12270	12500	8446	16340	16640	9307	10730	8234	6995	15130	13260	20430	15380	12840	12200	11350	9517	13100	12140	15010	20810	11620	13340	17920	11980	11020	21410	18640	14340	17160	16430	18230	15900	15290	11850	17190	10140	16080	16470	14720	18460	10730	17030	27480	30110	31740
PC 60:10|PC 30:5_30:5	1106.85	6.096	[M+H]+	7352	7435	5987	9701	9126	4742	6164	6514	5297	8098	6154	12490	8066	8430	8682	4933	0	8599	5635	9108	10180	7503	8434	15220	7425	8825	12810	11340	9575	9647	12230	11830	9921	10260	10770	12210	6775	10910	12380	8507	13240	7060	13630	19300	18530	23180
PC 60:12|PC 30:6_30:6	1102.81	5.476	[M+H]+	6331	6168	5127	7359	7714	3530	6307	6240	6462	7616	7502	9167	7248	5565	8036	4907	4025	6287	5015	7553	8286	4726	6774	11380	5457	6218	11130	8910	9275	9586	10770	8264	7520	7924	8546	8750	6344	10540	11980	8032	8662	4784	8782	15830	11770	21280
PC 60:6	1114.91	7.181	[M+H]+	46680	46880	45910	55290	46450	53210	52340	78030	84570	56510	53540	54160	53120	53250	45310	44620	48880	57990	50550	61550	49270	41730	60940	64150	57660	54880	46260	65180	63910	53360	61460	74530	67810	55140	45750	69770	65830	51520	53930	64500	85500	42960	55420	79970	77320	47970
PC 60:7	1112.9	6.823	[M+H]+	67880	71670	60660	80700	65620	62940	79510	72580	70860	78540	69120	74000	77930	71020	61430	70440	59530	74330	68590	80650	68730	55230	71620	91500	64710	87330	67400	77430	73150	75900	91190	78830	77450	78400	66640	82010	72760	72130	81310	66880	88810	63680	65740	109300	94020	62360
PC 62:12	1130.85	5.927	[M+H]+	3483	3852	3621	5494	5407	1902	4482	4656	3259	4541	5130	7457	6019	5009	5798	2609	2779	4916	4288	5032	6769	3529	4164	5949	3339	4052	7244	5981	5860	7262	7869	6215	6455	5929	5590	4932	4974	6314	7720	5209	6741	3153	6015	9370	9422	13850
PC O-29:1	676.529	1.882	[M+H]+	231800	225700	243700	256000	214800	193800	261700	106200	90220	264200	220100	208600	226700	218300	210700	196900	167300	243400	249400	234400	222300	272300	250100	164100	114500	133100	129500	136000	127500	145300	153600	130400	118700	128400	121700	130000	135000	143800	137700	94410	145700	120700	140000	131700	115500	162100
PC O-30:0	692.556	2.753	[M+H]+	462000	349600	466800	469300	406800	441200	566300	378600	309000	449800	374000	400200	414900	379800	322600	388800	374100	452700	383200	466300	383700	575700	392100	295500	242200	267200	245200	269000	307800	309100	318700	244400	222200	233900	256700	269100	306300	294800	274800	182400	280900	263100	264400	237700	210900	251000
PC O-30:1	690.54	2.733	[M+H]+	175500	128800	169400	170900	151200	166800	204000	142100	122400	143100	143400	141700	153500	134500	108100	146100	132100	158100	141000	166600	135600	203400	129000	104400	95640	91210	85310	88750	107500	114600	116000	88150	76100	88610	94970	86290	106000	109500	113000	67940	99360	96260	79340	89730	68670	78810
PC O-30:7	678.471	1.273	[M+H]+	34370	44860	41820	35590	40770	33430	34370	45700	48110	55200	90300	46900	34460	41050	56820	31080	22430	35090	28270	31200	27340	32880	28080	41800	32970	45230	46940	41350	30860	33460	43520	44040	48030	50650	52750	44030	32400	44880	42760	32980	29570	37780	35490	40670	36670	43500
PC O-32:0	720.588	3.289	[M+H]+	968600	971600	917600	1016000	1056000	1130000	1148000	1072000	921500	1130000	1015000	1024000	1035000	1038000	966200	938900	1059000	1072000	953900	1000000	1136000	1082000	1058000	873800	928700	931700	927200	1009000	932300	1092000	962900	914600	857000	1020000	982600	931200	930700	932400	809200	845700	852700	870900	928300	825100	900900	1045000
PC O-32:1	718.574	2.811	[M+H]+	761100	606000	834700	777400	668600	771600	1020000	658600	541500	778100	651700	661100	736600	653500	609600	756500	735400	846700	656500	766300	705400	999700	668700	454700	407700	454200	403100	436700	492400	482400	549900	402300	383800	383400	438000	426600	501300	460900	472000	302600	466800	437100	416600	346400	342200	407800
PC O-33:0	734.605	3.737	[M+H]+	198700	209600	190700	203900	184700	232500	187800	261100	223200	226700	216400	205100	187500	206700	176700	211000	238600	236400	210400	199100	202300	221400	208800	154100	199800	188400	154300	175100	185100	208000	151600	170100	147200	176300	175900	180100	202500	199800	174900	167900	175000	194100	185400	158000	146700	146200
PC O-33:4	726.542	2.172	[M+H]+	50560	62850	58780	64330	56020	38860	49480	25090	17280	70500	51070	67020	59720	58090	51710	48220	37090	59590	47700	61790	61500	47240	51950	87570	48480	68550	61270	59240	67890	59360	66240	52470	54980	54930	46920	56410	55670	64300	73010	41150	78880	52100	67400	79990	63780	63360
PC O-34:0	748.619	3.866	[M+H]+	720500	699100	676700	805800	835200	732400	776300	675400	546700	884900	800100	831500	743700	771000	740000	674600	655600	787900	699800	803400	836200	821800	771200	880400	766100	773600	885600	969200	832500	953700	970200	838100	794100	935300	875000	849500	759400	881000	783100	845000	865000	688600	780400	981200	1084000	1335000
PC O-34:1	746.603	3.378	[M+H]+	8671000	8410000	9820000	9348000	8312000	10980000	10370000	9700000	8748000	9124000	8122000	8196000	8878000	8857000	7568000	9594000	9817000	10060000	8679000	9156000	8423000	10930000	8179000	5764000	6068000	6921000	5986000	6302000	6873000	7423000	7116000	5689000	5656000	5957000	6657000	5969000	7104000	7139000	6778000	4949000	6592000	7210000	6402000	5403000	5247000	5742000
PC O-35:0	762.644	4.278	[M+H]+	166300	159600	160300	191500	160000	169500	115200	223000	179500	185000	154400	167400	168400	169600	144400	163300	133600	175700	157200	188700	186300	179000	161600	161200	131900	136500	116500	119200	137900	168300	118700	126100	111300	138800	121200	137000	147100	165200	167000	107400	150600	123100	168400	144700	142400	147200
PC O-35:1	760.622	3.821	[M+H]+	1240000	1388000	1280000	1423000	1319000	1393000	1062000	1336000	1224000	1455000	1371000	1435000	1412000	1322000	1279000	1339000	1370000	1460000	1336000	1442000	1366000	1501000	1382000	1050000	1068000	1273000	1090000	1116000	1097000	1212000	898500	1001000	873700	1132000	1081000	1042000	1093000	1292000	1222000	951600	1125000	1040000	1303000	971000	960900	1074000
PC O-36:0	776.651	4.43	[M+H]+	88540	84870	81970	108000	100900	81680	81350	60320	44370	105100	97920	99060	89520	87730	81600	85440	67030	102000	82310	104200	95910	106000	93020	101300	63400	58840	61190	85950	74080	82770	76050	72800	65080	73130	62910	67540	72600	80500	71660	55830	86030	61590	62150	93080	89530	97790
PC O-36:1	774.633	3.958	[M+H]+	4453000	4339000	4979000	4992000	4399000	4888000	4591000	4473000	3767000	4832000	4232000	4352000	4582000	4313000	3887000	4695000	4064000	4876000	4514000	5001000	4371000	5328000	4108000	3377000	2859000	3199000	2822000	3155000	3254000	3606000	3525000	2731000	2689000	3031000	3113000	2832000	3245000	3794000	3739000	2237000	3377000	3211000	3081000	3093000	2751000	3179000
PC O-36:3	770.598	3.413	[M+H]+	598900	649500	670900	586700	578800	757400	706000	702000	720100	690500	517400	636200	630400	643900	587700	649400	691000	678100	616300	646300	585100	542100	571700	492400	530100	682200	574800	527900	580800	652900	686100	525700	536100	590200	546700	539800	606700	600100	639400	504100	560800	654600	592200	499800	443700	352300
PC O-36:5	766.572	2.829	[M+H]+	542600	473300	522100	553500	593900	602500	664000	610100	550500	777900	402900	668500	598000	605000	437900	581500	656300	680400	469000	620800	765300	488500	565900	570800	559000	653100	549200	545000	657500	618800	670100	569900	549500	671700	581100	611100	713300	587000	688400	542500	665100	585400	607800	565800	476700	480200
PC O-38:0	804.678	4.985	[M+H]+	14620	15090	15320	17410	19880	14460	15680	11630	7614	21990	17460	18180	16520	14860	14790	13350	11480	17460	15070	17420	17720	16970	17200	21680	13510	12480	12790	16630	17220	15950	16830	16690	14040	13860	12820	15460	13150	12250	15270	12070	18500	11790	13570	20420	18980	17720
PC O-38:3	798.633	3.942	[M+H]+	802800	840200	856600	797700	751000	922800	937500	886400	869300	834100	741500	802800	767100	780800	734500	832500	777300	862800	774300	880700	781100	748200	756100	640700	663900	768300	657000	638300	700300	802500	874200	658500	677900	704500	708000	662700	715400	794700	808100	601300	705700	798200	614800	705300	657200	536800
PC O-38:4	796.619	3.269	[M+H]+	109700	105000	108800	107000	108800	138500	122500	138000	122900	124200	101100	114900	117000	121500	105700	118700	132000	122200	100400	107400	133700	114500	109100	82480	112200	123800	111800	113700	105400	125200	106400	108100	110500	116200	115700	105400	116100	109400	111000	103100	99430	116900	121500	96040	96470	92750
PC O-38:6	792.585	2.699	[M+H]+	652000	683100	689300	683700	665900	860800	817900	749800	753800	706400	697100	744200	729700	758500	677200	780400	973600	730100	729400	721500	710300	689700	797400	581600	896300	872600	785800	871000	878600	795500	876100	846300	786800	806200	861300	811200	888600	755600	811500	866200	781900	956900	808700	660200	671100	690500
PC O-39:10	798.54	3.343	[M+H]+	130300	169000	143500	136500	146400	177800	143700	182500	202400	148900	153800	148600	140900	172100	143400	158100	199200	159900	155100	138600	151100	142700	147600	119000	174400	208400	191000	182500	176000	223800	167100	172800	191500	188900	203200	166500	189400	180900	169800	208900	170700	201400	194300	165200	173100	193700
PC O-39:8	802.572	3.924	[M+H]+	95330	108100	103100	81420	78780	112500	82360	78570	92850	93560	98360	98000	91540	92230	99270	105800	119500	101400	110400	95530	95040	78540	101800	72550	132200	124500	110300	106000	93430	124900	84400	113400	104500	133800	130800	109500	106800	130900	94870	106900	93500	125900	104100	94650	95150	86200
PC O-39:9	800.552	3.411	[M+H]+	79900	102500	92570	74670	80280	111900	73250	98060	106500	82980	83880	84110	84140	97770	89760	91960	114300	98650	92050	87920	72050	75280	87700	66200	86860	117000	93690	85260	90530	98310	71620	89650	86550	97080	90000	96600	99770	101900	93630	91880	86380	114800	104400	67310	80740	62660
PC O-40:1	830.698	4.957	[M+H]+	112500	103500	110900	126900	122800	97240	104300	84120	74990	128500	106800	116700	114500	106600	95100	103100	79580	118600	103900	129500	122400	120700	104700	123600	70580	73000	73750	78160	86080	92000	84660	72240	71860	80440	75040	73420	77640	95330	104300	60090	97550	76260	88060	100600	84920	94270
PC O-40:4	824.647	4.069	[M+H]+	35590	36810	29710	36240	38850	181100	49840	54050	44110	47170	147700	41960	36580	41150	38580	40830	36140	40760	35650	39430	43200	36920	32650	42220	37550	40650	43540	35810	36830	47340	57860	43970	41960	45970	36940	43780	44710	54630	47110	37280	41160	51640	42790	38730	27290	41330
PC O-40:6	820.615	3.272	[M+H]+	97360	133100	110700	107100	124700	131500	121200	137900	133000	123800	121800	124300	108100	116800	127300	111200	120400	124200	109100	115500	115100	107200	112600	108500	127400	130500	140000	134200	133000	149600	139800	131900	134200	138900	139100	119200	118300	148000	141300	126600	118500	138300	122100	120600	116800	120900
PC O-40:7	818.605	2.76	[M+H]+	166100	159600	163900	170100	166100	192200	200600	153700	144800	179800	181200	196800	196200	195600	180900	167900	213900	199700	205200	163100	175500	182600	175800	151300	184100	175100	183900	176700	189100	183500	215500	186500	179800	179100	188100	176600	186500	182400	189100	179700	172900	169600	173400	168000	166200	162600
PC O-41:1	844.718	5.335	[M+H]+	43520	44140	43750	50600	48050	36200	30640	52660	42020	47930	41920	51930	47960	46340	38680	41300	31870	41460	46940	51600	44550	47140	42750	43880	33840	34260	32510	38980	39360	47030	36990	33900	32950	34210	32700	40350	35700	45170	41610	30150	39780	30640	39330	48980	43870	34110
PC O-41:10	826.57	3.925	[M+H]+	5266	4642	5330	4504	5528	5432	4176	6276	7194	4979	3083	4159	4183	3553	4405	5880	5596	4625	4396	4634	4635	3238	3806	4587	6140	8852	7514	6467	5882	5644	8882	6914	4803	7399	9803	7439	5544	8193	5295	8283	5603	6469	8103	5442	6525	11030
PC O-41:11	824.546	3.917	[M+H]+	11170	13430	12940	10670	9872	13950	8996	15060	12820	9796	11700	10790	12470	12410	13540	13070	15230	12220	14000	11770	10030	11570	11250	6625	15200	15050	12840	12000	11890	16210	11840	11720	12690	14720	15170	11200	13920	13480	11280	16330	12480	15500	13880	9282	11230	9595
PC O-41:9	828.603	2.945	[M+H]+	1806	4217	2553	1964	1989	4274	3148	3796	3517	1462	3521	3064	3301	3628	3244	2788	3210	3602	4238	1716	1900	2028	3640	2948	5074	3512	3504	3148	3821	3304	4305	3336	2325	3109	2753	3217	3274	3979	2380	2761	2438	5339	4123	2716	1987	1745
PC O-42:2	856.715	5.016	[M+H]+	63180	57420	69960	73870	69960	62080	60960	59120	57440	74820	61370	71240	63560	61200	54900	60900	47750	71210	55320	73020	69850	74830	60350	72060	45190	43380	45650	45880	52330	58720	53160	44870	45900	49100	46340	49200	51370	59550	66480	37080	62670	50550	54440	62630	53040	63720
PC O-43:2	870.745	4.909	[M+H]+	12860	15900	15050	39000	3904	18330	12020	18820	15320	8202	12590	8347	7434	15470	13510	14210	23120	12400	19490	10580	10340	12880	21420	6646	33340	13980	26900	87780	28490	13240	13160	67850	21560	12870	16940	21550	28980	15620	11450	40830	24160	13850	14130	9291	30290	16110
PC O-43:3	868.73	4.324	[M+H]+	852300	1030000	999100	785400	749100	1371000	1063000	1077000	1169000	819200	904600	749600	874900	961900	926800	945000	1259000	831700	1070000	734000	756200	832600	990400	706700	1419000	1190000	1045000	1614000	1243000	1075000	876600	1501000	1179000	1006000	1056000	1238000	1390000	976100	751300	1490000	1144000	1092000	809200	1024000	1199000	716400
PC O-44:3	882.745	4.587	[M+H]+	14270	16820	14790	8172	10100	19510	19210	17370	17950	11800	14720	10350	12740	16250	15890	13370	22140	13010	17810	10660	9914	12230	16670	10180	28340	19980	18310	30670	22250	15130	15140	28540	21510	15890	15880	20370	27520	12410	10420	31290	21670	16190	12570	16020	17760	8077
PE 19:1	508.302	1.164	[M+H]+	435100	681300	657200	535200	677800	434200	497800	441500	547600	667700	612800	642700	460900	612300	718200	357000	270700	408600	371600	336500	226900	309600	294800	540300	448900	730600	480500	450600	432500	474400	506600	466000	602500	420200	528900	461200	525600	474500	546000	276000	319500	384200	389400	318400	255500	225000
PE 21:1	536.335	1.279	[M+H]+	264400	429200	421500	345000	415600	275400	278300	297000	393400	435700	407400	476400	287800	374500	480900	386300	153200	268000	226800	242500	146900	191800	190100	343300	255900	425300	303100	288600	245500	277800	328700	274700	363400	257200	321800	279500	292900	321000	353600	165800	197200	241700	243300	217500	178600	150300
PE 21:3	554.288	1.054	[M+Na]+	81030	132400	123300	93850	157500	85810	97690	113400	133800	150200	163300	154100	130500	136900	164300	88520	69690	99020	95930	75750	48070	65880	73270	156600	121200	176600	150000	128500	121300	137800	148100	142600	162200	135000	156600	145700	138200	129400	152400	101400	92850	124700	127700	119900	87250	109800
PE 23:4	558.319	1.147	[M+H]+	121000	179400	164800	141900	192700	112200	109400	126300	159100	179600	166400	179900	125200	167100	194700	117500	81870	117300	106200	93590	65350	80430	89880	170500	143200	197300	142800	133600	128200	144300	114400	145600	178400	130400	156100	126800	148600	140800	162500	89600	95270	123700	117000	98780	80980	70270
PE 32:1|PE 16:0_16:1	690.504	2.613	[M+H]+	159800	178400	171300	176800	148800	153000	195200	155000	148800	177100	153500	148300	166300	157100	133500	150100	135100	176900	166900	171400	167300	184900	158100	158400	171100	203000	180800	176900	173300	179100	219000	173100	155000	156700	158500	165300	163300	190700	169200	148900	175700	181900	170900	180500	189200	153800
PE 32:2|PE 16:1_16:1	688.489	2.245	[M+H]+	9519	10460	11100	11540	12210	7639	12320	11670	8953	14000	8702	12210	10930	7753	7394	7832	8000	10140	8096	12610	13510	11840	13640	15450	10750	10330	13060	8964	10560	10070	16730	7533	9749	10370	8375	10350	9866	10910	9942	7261	12520	8720	11090	14120	12790	17810
PE 33:1|PE 16:0_17:1	702.506	2.906	[M-H]-	78150	87110	81670	76000	81600	67080	92240	57210	55790	97920	83520	66790	75890	77800	81030	68290	63180	83720	83470	67400	72360	94250	66480	81800	68580	78190	63110	65440	73580	71220	79990	74440	49090	53620	46320	80100	51370	69570	66890	47190	70650	54960	73050	68960	60360	73740
PE 34:1|PE 16:0_18:1	716.52	3.155	[M-H]-	11980000	12520000	11750000	14120000	13010000	10630000	11950000	10140000	10080000	13120000	12440000	12780000	12060000	11450000	10960000	10920000	9299000	12420000	10700000	13500000	14440000	12440000	13330000	15850000	12080000	11980000	13180000	13590000	12950000	12980000	14260000	13460000	12860000	12900000	12650000	12680000	11630000	12800000	13620000	11300000	13110000	10690000	12230000	15750000	15500000	15120000
PE 34:2|PE 16:0_18:2	716.519	2.694	[M+H]+	739500	748400	758400	786100	761600	689400	889600	718500	656200	786600	735100	723100	723400	716800	608600	671000	657400	813900	682400	821200	887200	856000	838200	775200	752100	880100	855500	825800	789700	824100	1156000	790200	776500	800800	863400	777500	764600	891800	794600	710000	762300	816600	788100	875600	900000	902400
PE 34:3|PE 16:1_18:2	714.505	2.312	[M+H]+	179300	236000	196100	164000	194100	172400	180000	43410	36930	237100	171100	182900	186200	213100	191600	196300	183200	198600	200900	192400	198700	170000	168200	190200	132400	208800	154500	140600	188400	134600	92860	171500	155500	142600	139900	178500	155400	161300	196400	122000	239000	210300	187300	139700	103900	133700
PE 34:4|PE 16:1_18:3	712.501	2.186	[M+H]+	101500	63010	51590	100900	64820	29600	53790	93340	96220	671600	149100	137000	120200	105000	100900	106200	69020	252700	90960	105000	232300	183200	161800	149500	91860	68790	67660	386500	88960	102800	259000	90620	59640	276500	86710	78670	83810	246900	155400	55700	52230	92900	340200	229700	156500	249400
PE 35:1|PE 17:0_18:1	732.546	3.415	[M+H]+	110700	133700	122400	104300	100900	139400	165300	112100	113100	114300	110700	110600	121900	122800	110900	128100	151100	135800	133800	115300	103000	123300	125200	78720	125100	152300	115100	105200	112100	124200	158600	116800	108500	111400	129800	131400	134100	127800	114500	111800	115800	143800	120300	94340	88330	75070
PE 36:0|PE 18:0_18:0	748.582	4.105	[M+H]+	652400	736300	658300	637400	614300	785000	719000	580900	589800	675600	653800	665900	668200	715800	643500	720800	792900	737300	692600	686600	661800	646100	674900	544000	791000	905300	749000	784600	743300	819300	849400	782600	765100	783600	810300	780200	813900	797700	708800	815000	770400	867300	737900	688800	729600	563400
PE 36:1|PE 18:0_18:1	746.567	3.709	[M+H]+	6490000	7660000	6805000	6381000	6172000	8165000	7248000	6096000	6314000	6786000	6719000	6566000	6725000	7141000	6538000	7216000	8015000	7500000	7373000	6834000	6459000	6791000	7019000	5357000	7763000	9214000	7554000	7769000	7374000	8011000	8444000	7514000	7353000	7514000	8103000	7633000	7877000	7880000	7158000	7883000	7668000	8675000	7303000	6437000	7116000	5584000
PE 36:2|PE 18:1_18:1	744.551	3.247	[M+H]+	8387000	9417000	9066000	8809000	8076000	11310000	9297000	8756000	8350000	8739000	8558000	7991000	8822000	8859000	7930000	9652000	10550000	10020000	9414000	8670000	8221000	10000000	8885000	5915000	8245000	9289000	7818000	8357000	8014000	8805000	8658000	7700000	7730000	7918000	8454000	7665000	8426000	8858000	7746000	7601000	7438000	9904000	7593000	6792000	6785000	5899000
PE 36:3|PE 18:1_18:2	742.536	2.788	[M+H]+	1613000	1851000	1694000	1741000	1701000	1778000	1863000	1501000	1418000	1785000	1620000	1868000	1808000	1940000	1638000	2009000	1942000	2364000	1976000	1962000	1805000	1953000	1826000	1462000	1605000	1993000	1745000	1821000	1850000	1865000	2045000	1943000	1765000	1724000	1916000	1937000	1985000	2197000	2077000	1881000	2189000	2473000	2306000	1906000	1767000	1557000
PE 36:4|PE 16:0_20:4	740.519	2.654	[M+H]+	4826000	5410000	4665000	5091000	5202000	4673000	4975000	5435000	5202000	5140000	5042000	5277000	4926000	4998000	4471000	4615000	4116000	5333000	4875000	5558000	5508000	4944000	5468000	5322000	5401000	5601000	5809000	5671000	5130000	5888000	6286000	5584000	5575000	5612000	5876000	5097000	4954000	6120000	5774000	5415000	5287000	5219000	5665000	5993000	5951000	5412000
PE 36:4|PE 18:2_18:2	740.522	2.367	[M+H]+	4810000	5386000	4651000	5098000	5204000	4638000	4970000	5313000	5178000	5150000	5023000	5306000	4945000	5010000	4445000	4623000	4126000	5320000	4846000	5575000	5520000	4903000	5444000	5353000	5440000	5606000	5810000	5709000	5173000	5908000	6314000	5598000	5572000	5644000	5649000	5115000	4983000	6124000	5825000	5228000	5302000	5239000	5697000	6019000	5982000	5442000
PE 36:5|PE 16:1_20:4	738.504	2.282	[M+H]+	627200	582000	558500	658300	654500	441900	639400	626200	635100	689900	622800	581800	529600	543000	446400	444600	342600	529400	423600	683300	773800	592700	650600	872200	558200	560900	670000	535600	563400	609400	793100	630300	533500	648100	578300	497600	463100	610300	569300	389000	533400	428100	560300	728300	660800	1013000
PE 36:6|PE 14:0_22:6	736.492	2.098	[M+H]+	71990	56680	51540	75690	75480	41630	73330	78360	68910	127900	78720	87600	76610	64860	67800	52860	46990	91420	59240	71950	106200	72450	85070	108000	62440	56680	75960	64130	60610	65240	91960	67100	61920	95970	60410	67020	56850	88460	76290	50260	61840	51020	98710	87010	82940	163200
PE 37:1|PE 18:0_19:1	758.562	3.977	[M-H]-	789900	722800	783900	863800	751600	674800	735600	597600	584800	786300	723100	780700	791500	709200	667400	727400	649900	798800	738800	840500	762400	832100	759400	816400	615900	621400	606700	690400	671000	661000	699900	656300	629800	627500	586400	659700	672600	681100	717100	549900	726500	602600	650200	733000	661400	665100
PE 37:2|PE 18:1_19:1	756.555	3.463	[M-H]-	368100	341800	368900	447400	434700	382500	372500	334300	337700	455500	355300	428600	388800	355100	313800	364800	305400	472400	344200	457700	390200	517500	428600	463400	335400	263000	282800	360900	376700	355900	399500	299300	296800	336000	275000	367900	362900	369000	338900	242700	351200	276600	315500	346900	314900	368200
PE 37:4|PE 17:0_20:4	752.522	2.933	[M-H]-	329900	332700	314800	359800	347100	260900	391800	331000	325400	375300	323100	391100	333500	328700	322200	283300	247200	340000	303700	390500	388800	308700	362300	500300	340500	331600	371800	359900	362300	358300	471500	378700	382000	365500	332700	383900	332300	369200	389200	342900	386800	309700	397900	482500	413300	478100
PE 37:5;2O|PE 20:4_17:1;2O	782.494	2.148	[M-H]-	349900	323500	342400	420300	382000	279000	360600	344900	174200	360700	323900	360100	360100	334200	311000	297600	272700	370800	309300	394300	402300	352100	325000	515700	264300	263700	274600	273100	327900	262600	335600	252600	290500	245400	245500	294700	291700	310300	367300	215500	369000	257700	302900	378200	304400	326600
PE 37:6|PE 15:0_22:6	750.507	2.25	[M+H]+	67170	78230	66650	89960	72330	59890	76510	68550	66840	73660	72190	70760	78790	63250	75760	60790	46760	77830	84120	93250	69410	86830	90620	101700	58450	56280	66350	105700	60640	78560	82490	68740	73730	65570	66820	71910	74350	64900	78530	61460	73070	60230	105800	109800	74470	121200
PE 38:1|PE 18:0_20:1	774.598	4.203	[M+H]+	1372000	1454000	1334000	1446000	1343000	1544000	1323000	1189000	1154000	1427000	1399000	1354000	1438000	1417000	1283000	1542000	1601000	1643000	1537000	1457000	1312000	1609000	1479000	1042000	1135000	1277000	1044000	1126000	1209000	1274000	1158000	1083000	1060000	1179000	1162000	1118000	1271000	1274000	1095000	1018000	1284000	1262000	1169000	948900	1053000	1062000
PE 38:2|PE 18:1_20:1	772.582	3.735	[M+H]+	4050000	3994000	4208000	4147000	3469000	5085000	4030000	3253000	3153000	3895000	3757000	3376000	4127000	3796000	3345000	4642000	4613000	4643000	4401000	3835000	3467000	5077000	3922000	1953000	2578000	2697000	2265000	2594000	2578000	2780000	2581000	2375000	2356000	2389000	2662000	2416000	2655000	2837000	2484000	2113000	2559000	2983000	2390000	1910000	1953000	1865000
PE 38:4|PE 18:0_20:4	768.55	3.217	[M+H]+	7594000	8877000	7800000	7498000	8209000	9426000	8616000	9317000	9252000	8535000	8260000	8739000	8273000	8985000	8314000	8131000	9274000	8945000	8420000	8407000	8464000	7957000	8628000	7285000	9591000	11380000	9815000	10090000	9262000	10430000	9762000	9185000	9686000	10350000	10200000	9679000	9735000	10270000	8727000	10310000	9140000	11020000	9542000	9713000	9367000	9699000
PE 38:5|PE 18:1_20:4	766.536	2.731	[M+H]+	18500000	18870000	18430000	19670000	18700000	18460000	18390000	19030000	17740000	19020000	18370000	18820000	19120000	18490000	16460000	18590000	16620000	20770000	17970000	20520000	18750000	19930000	19090000	17050000	16730000	17400000	18230000	17560000	17240000	19350000	19620000	18010000	17680000	18050000	18100000	16430000	16560000	19960000	19670000	16170000	17150000	17750000	18500000	17850000	17350000	16860000
PE 38:6|PE 16:0_22:6	764.521	2.47	[M+H]+	17890000	19700000	16790000	20740000	20510000	16750000	18230000	20800000	20200000	19790000	19420000	20430000	19780000	18790000	18460000	17130000	16260000	20600000	18530000	20090000	20490000	18680000	19960000	19640000	19430000	18080000	21300000	21550000	20610000	22220000	21890000	20790000	21430000	21510000	20820000	20020000	17770000	22640000	22620000	20320000	20310000	18980000	21570000	22080000	23000000	23750000
PE 38:7|PE 16:1_22:6	762.508	2.149	[M+H]+	1032000	1168000	989600	1248000	1188000	904500	1361000	631700	584200	1327000	1243000	1305000	1188000	1104000	1306000	988200	937800	1245000	1139000	1001000	1267000	1086000	1240000	1693000	1177000	1108000	1376000	1256000	1291000	1348000	1826000	1440000	1251000	1348000	1299000	1380000	1113000	1410000	1413000	1198000	1286000	1141000	1423000	1405000	1400000	2135000
PE 38:8	760.491	1.931	[M+H]+	18420	21120	18890	20350	19740	18970	29200	5803	5512	24490	24680	23870	21900	20650	27330	21600	19540	26710	22900	17820	23410	19470	23540	20920	19650	21300	22850	24750	21710	21200	26370	24130	21560	25010	28460	20530	20240	24600	18890	18800	25880	21260	25500	22860	19720	31680
PE 39:6|PE 17:0_22:6	778.536	2.715	[M+H]+	374600	397900	401600	414300	452500	386500	507300	466100	416100	396300	407700	439900	414600	407400	410400	391700	357800	418900	379700	494200	398400	438500	447700	425300	402400	435500	509000	496400	473800	511500	680700	524200	487100	501800	491300	443100	410100	509600	528400	499300	477600	434200	461200	562200	552700	552100
PE 40:10|PE 20:5_20:5	784.488	2.145	[M+H]+	86650	92830	94640	91610	106600	69510	112000	48380	41200	97740	93340	96880	98850	99910	104400	78900	77550	116000	98590	90140	103100	93510	112800	112800	63240	92380	91320	74080	86570	91360	116100	83170	82220	80650	79800	79070	77140	103200	104600	71030	87660	87880	102300	103200	89700	142600
PE 40:2|PE 20:1_20:1	800.611	4.251	[M+H]+	681900	667400	683600	716800	640800	747400	673300	522500	498800	679500	656400	629600	683400	650300	577300	775800	701600	833300	739300	653800	595200	881300	687000	420700	444600	448400	392500	432100	461900	518300	471300	399200	403200	453500	457300	441700	467300	516000	463900	377200	472900	541500	437300	382700	377100	403200
PE 40:3|PE 18:0_22:3	798.597	4.005	[M+H]+	278100	288300	302500	278500	262000	348600	305900	287800	261400	306200	269100	274300	285900	281900	262900	316200	330100	332800	300800	285900	268000	351600	295700	211200	271300	303100	259100	273700	258000	275900	251000	246300	248600	271300	288800	263700	280100	290000	239000	247700	257800	299900	284300	218000	220800	231300
PE 40:4	796.583	3.785	[M+H]+	794400	949100	802400	735000	768300	1046000	838700	908900	985700	869200	796900	869200	859200	923900	824700	902300	1032000	941100	898400	805600	807400	804600	880900	711500	1156000	1234000	1073000	1033000	948300	1157000	937800	1028000	1093000	1117000	1219000	1044000	1059000	1128000	956900	1159000	938700	1329000	1109000	883800	967100	830200
PE 40:4|PE 18:0_22:4	796.582	3.569	[M+H]+	457500	592900	435000	388200	448100	609100	621300	563700	773800	517900	477000	527500	513000	568200	699200	517100	769100	527800	545400	430600	480300	427300	533400	433900	1159000	1242000	1078000	1039000	775000	944700	617800	1032000	940900	1121000	1228000	895700	867800	948100	632000	1169000	631600	1109000	957500	564600	973300	561200
PE 40:6|PE 18:0_22:6	790.536	3.04	[M-H]-	76040000	81740000	76240000	95060000	94180000	67430000	79320000	77960000	76550000	88700000	86010000	92660000	82580000	81680000	82090000	74980000	60890000	84120000	75390000	89110000	95990000	81040000	87130000	122300000	87900000	76150000	104900000	102800000	96620000	95610000	103600000	101400000	102200000	100400000	94290000	94100000	79800000	100600000	106900000	97500000	103200000	78980000	94100000	132300000	129100000	142100000
PE 40:7|PE 18:1_22:6	788.524	2.556	[M-H]-	12100000	12240000	11110000	11910000	13260000	11090000	11850000	6417000	6318000	13440000	13040000	13950000	12330000	12140000	14230000	11480000	11840000	12620000	12520000	11430000	12760000	10620000	11760000	15800000	14880000	12480000	15420000	16850000	14900000	15020000	15420000	17300000	14530000	16760000	15400000	16360000	12700000	14960000	14910000	17110000	15040000	13150000	15450000	15330000	14960000	16670000
PE 40:8	810.509	2.184	[M+Na]+	852400	925200	984400	782800	779900	789200	967800	55270	48680	826400	932700	762000	873800	921200	951900	908500	797000	1014000	1027000	721400	728600	900200	970500	699900	669800	724400	785500	692500	777600	792600	707000	801100	715300	678400	804800	736500	694100	806800	845100	694000	781300	837200	866600	670300	624300	764500
PE 40:9|PE 18:3_22:6	786.507	1.964	[M+H]+	115100	126300	112900	131100	127000	115000	144000	71630	56310	184200	149100	151600	151000	145300	176400	140100	129600	190300	167200	129800	152100	155700	156100	141500	105200	116600	133000	164200	135500	145100	163100	159400	132100	165400	146100	149900	126700	188300	183700	137500	167600	157400	220100	170000	149300	209600
PE 41:1|PE 23:0_18:1	814.629	5.1	[M-H]-	112100	95120	114700	106600	100400	100700	110700	93730	92910	106400	101600	111600	99370	100700	99330	142400	105200	115000	105400	116300	113700	106600	114400	124900	122500	97900	98440	108900	109400	125400	127600	130800	99500	118100	118300	121900	107300	119200	114600	115400	115500	97800	110300	115400	100000	98960
PE 42:1|PE 24:0_18:1	828.644	5.36	[M-H]-	276200	203200	259600	262600	259900	230500	319700	148300	152700	278700	247300	278100	232000	236500	240000	330900	264800	298400	257900	270900	307000	296900	287200	301000	280700	198900	232000	237500	280400	327900	361500	325700	254000	252800	261000	299000	262900	280300	273000	242800	280300	237300	276400	282800	221800	309700
PE 42:2|PE 18:1_24:1	826.63	4.807	[M-H]-	1055000	1084000	1442000	1172000	768400	1218000	821500	1248000	1750000	851700	865800	861100	906100	883900	763900	1426000	1092000	964200	1003000	900800	961500	1045000	1073000	1094000	1130000	967200	845600	1075000	1085000	1512000	919200	1399000	938400	912000	1075000	1515000	1292000	1479000	1247000	879100	1266000	1373000	1090000	1178000	1054000	958800
PE 42:4|PE 18:0_24:4	824.612	3.983	[M+H]+	111400	118000	109300	111400	110300	114400	124800	126500	120100	122300	103300	128500	109400	108400	111400	110500	118400	126300	118200	118600	118000	120200	115300	126700	129500	138400	129700	131300	122500	142300	147900	124000	127600	137200	139500	135600	134200	145500	134900	115600	132800	138200	140300	128100	125600	148900
PE 42:5|PE 18:0_24:5	822.598	3.757	[M+H]+	73150	89220	69360	55820	59190	86730	56630	93860	75260	81030	61400	79020	78380	74190	79570	60120	81430	85310	78760	57730	75230	78810	60330	70470	81730	104600	80670	86520	71980	102500	82760	72910	87270	83890	92610	75740	81530	75200	81540	69180	76780	90260	82950	65980	88000	70660
PE 42:7|PE 20:1_22:6	816.554	3.087	[M-H]-	2518000	2435000	2324000	2516000	2536000	2322000	2197000	816200	783800	2453000	2408000	2375000	2337000	2337000	2450000	2611000	2686000	2578000	2831000	2153000	2146000	2281000	2155000	2207000	2399000	2306000	2161000	2806000	2334000	2260000	1981000	2560000	1998000	2310000	2382000	2231000	2090000	2363000	2318000	2478000	2456000	2238000	2185000	1962000	1906000	1652000
PE 42:9;2O|PE 22:6_20:3;2O	844.514	2.477	[M-H]-	186100	186500	174900	207600	213000	168500	183700	298500	308500	190900	202300	205100	197200	183200	183200	168400	164300	188000	159700	212600	216100	189900	205700	245200	205300	172500	214400	220100	209800	216300	224900	206500	232900	215400	201800	214500	191300	213800	220900	209400	203500	180800	210400	260800	243200	281100
PE 42:9;O|PE 22:6_20:3;O	828.515	2.782	[M-H]-	129900	139700	135900	131400	140600	136800	141200	155500	146500	131200	126300	131200	148200	133100	140700	133900	132500	131800	139500	119100	138300	133800	138700	130700	118500	116100	133700	124500	124200	135600	128500	122700	128200	139500	121400	124400	126600	121900	126000	128800	122200	119000	130100	124700	130500	177300
PE 44:10|PE 22:4_22:6	838.54	2.406	[M-H]-	10040000	9787000	9322000	11940000	11310000	8077000	9050000	7343000	6802000	11150000	10230000	11360000	10200000	9886000	9960000	10180000	7567000	10670000	9264000	10800000	11960000	10630000	10430000	17110000	11710000	8977000	11910000	12500000	12440000	12140000	11080000	13420000	11650000	12830000	11860000	11350000	11040000	12070000	13280000	10670000	12170000	10530000	11720000	15390000	14250000	15070000
PE 44:12|PE 22:6_22:6	836.521	2.045	[M+H]+	17740000	21810000	19130000	19870000	20570000	16280000	19810000	8027000	7395000	20470000	22590000	20510000	19000000	18500000	23590000	17770000	14200000	21350000	20720000	18770000	19660000	19440000	22210000	23930000	18500000	17390000	22020000	21490000	19990000	21960000	22660000	22870000	21000000	21290000	22400000	20420000	17290000	21340000	23380000	21260000	20610000	19070000	21000000	23770000	22350000	26960000
PE 46:12	864.553	2.239	[M+H]+	765800	858200	741200	932200	868700	660800	688100	662200	643300	771800	797100	773100	745100	720900	728600	764900	594400	835600	751400	891500	787100	799500	795200	1067000	753800	671800	875300	676000	854500	864200	971500	892300	828400	792700	794900	738400	717500	922000	1097000	766400	832200	748500	809200	962700	908900	908900
PE P-32:0|PE P-16:0_16:0	676.523	3.409	[M+H]+	31900	24910	26130	29430	25560	36890	35210	31310	29180	26750	28770	21870	27040	28550	25760	31930	41880	32300	28770	26620	25360	34380	30350	12110	20170	15670	13450	18150	22150	20910	19100	18190	14080	18400	17500	19240	20540	16090	13970	20550	21280	16560	13610	14540	15060	14570
PE P-32:1|PE P-18:1_14:0	674.513	2.927	[M+H]+	145600	127700	145600	135400	106000	186600	144400	137900	117300	117900	105800	107600	123500	137800	106200	149600	222200	144100	127000	132200	101600	180400	128000	41810	114500	123500	57860	75220	91760	91430	79170	91320	80110	80200	88690	99520	126400	94360	78680	85090	99150	129700	80560	50120	47640	34350
PE P-33:1|PE P-16:0_17:1	688.524	3.238	[M+H]+	35680	31640	38800	32160	30060	43930	58380	35950	29130	31470	30230	33060	38500	37070	29770	36570	46710	34790	41070	35670	31150	42190	34130	17800	27140	32720	23630	24370	28510	27090	42200	23780	21860	25300	26660	28370	34350	30670	25460	17930	26990	33720	27370	20910	17480	16570
PE P-34:0|PE P-18:0_16:0	704.557	3.973	[M+H]+	63830	36900	45700	3327	45030	1876000	56290	48340	38130	46630	41970	38210	39130	45680	40630	37480	43820	46010	44210	43730	50030	60180	49580	44950	42970	1735	38820	54180	46220	34570	50460	47560	39470	39510	33570	38300	37380	2961	28550	41750	56530	2534	2279	43290	48310	47360
PE P-34:1|PE P-18:1_16:0	702.54	3.491	[M+H]+	11980000	12040000	12860000	11050000	10020000	16450000	12910000	11550000	11860000	11170000	11010000	10320000	12160000	12860000	10640000	13590000	16390000	12950000	13370000	11430000	10090000	13450000	11150000	5807000	10730000	11590000	8389000	9549000	10110000	10680000	9741000	8886000	8541000	9091000	10210000	9939000	11550000	10180000	8588000	9192000	9565000	12000000	9313000	6565000	6563000	5498000
PE P-34:2|PE P-16:0_18:2	700.524	3.093	[M+H]+	94270	89090	105600	85810	89590	146200	142100	97680	92990	100100	86530	86510	100400	107200	82450	87920	171700	108500	106600	88410	97740	114600	93950	57250	105600	128300	89440	88650	92840	108100	103000	82560	96500	79090	89020	101900	109500	100100	82730	90800	104400	134300	91180	63560	56530	58350
PE P-35:1|PE P-17:0_18:1	716.556	3.784	[M+H]+	789000	849300	909700	781800	710800	908800	1155000	652000	617200	790400	739600	790500	844000	814500	729600	823800	897800	836300	881200	815000	753400	826600	772100	540600	668100	819400	649400	670700	711200	753300	977800	667800	610100	645000	701300	738700	784500	781900	721500	577700	764100	758900	733300	604200	559800	509100
PE P-35:2|PE P-17:1_18:1	714.541	3.299	[M+H]+	80610	88920	92700	77980	71120	105500	136000	83130	77100	91710	74510	80560	87510	87820	74320	88550	117100	95020	95430	86330	86340	83380	80300	56970	74480	100700	62970	73060	82420	80820	103400	68590	67080	67350	70220	78660	91400	83060	78340	61160	75350	94150	78040	60860	53170	44310
PE P-36:1|PE P-18:0_18:1	730.57	4.059	[M+H]+	21670000	22730000	22360000	21830000	20560000	26040000	22320000	20330000	19890000	22700000	21690000	21430000	22550000	23300000	21200000	24290000	26160000	24260000	24360000	22660000	21410000	24270000	22370000	16520000	21150000	22950000	20110000	21880000	21190000	23300000	21760000	20080000	19740000	21150000	21840000	21100000	22750000	23530000	20550000	19890000	21400000	23110000	20400000	18760000	18910000	17700000
PE P-36:2|PE P-18:1_18:1	728.555	3.567	[M+H]+	9452000	10600000	10360000	8637000	8357000	13190000	11270000	9796000	10290000	9436000	9036000	8636000	9898000	10380000	9307000	10970000	14060000	10420000	11000000	9186000	8665000	9711000	9580000	5507000	10320000	12270000	8614000	9070000	9461000	9917000	9619000	8572000	8790000	8781000	9853000	9373000	10860000	9754000	8421000	9620000	8987000	11790000	9146000	6696000	6829000	5300000
PE P-36:4|PE P-16:0_20:4	724.524	2.958	[M+H]+	572200	557400	640000	500900	475600	888900	691900	675200	643600	597100	518300	453200	600000	624700	489500	663900	967000	764500	637000	565200	556600	706400	616100	254700	519700	647000	339400	393200	508100	459900	386100	419400	406200	384700	484800	443700	620100	458100	414900	444800	459000	619000	446800	283500	232900	212300
PE P-36:6|PE P-14:0_22:6	720.494	2.294	[M+H]+	10880	11400	13010	11680	11690	9637	7273	7690	6707	15340	9801	13130	9898	8105	9937	8315	6194	9566	10780	17260	12710	11120	13460	14750	10450	14910	13620	10860	11890	11090	14000	10900	13500	13120	10630	11950	13350	13730	15230	9971	13920	11850	22630	19580	12040	9996
PE P-37:1|PE P-17:0_20:1	744.585	4.284	[M+H]+	437800	460200	452200	448500	404700	448400	590500	302000	292500	440200	412800	455800	457100	442800	417500	473300	473200	477300	490400	477300	401600	466300	425200	345600	325700	388600	318300	329300	375000	403900	506700	336000	323300	340100	350100	378300	388200	406200	397500	267900	414700	406900	379700	331200	303000	287700
PE P-37:2|PE P-18:1_19:1	742.572	3.821	[M+H]+	475200	522300	550400	488300	435500	521800	660000	397700	380400	469300	416600	467500	494700	490400	427600	488300	512000	501400	516600	524200	442600	468000	460500	362100	388200	515600	384900	388700	428500	452800	601200	389100	366900	396100	403600	425200	462800	468300	466300	322300	458600	471000	417500	371900	348000	281500
PE P-37:4|PE P-17:0_20:4	738.544	3.268	[M+H]+	116400	120400	109800	102200	110800	134600	166300	131600	127600	118900	106800	126800	118300	132300	116500	115500	140400	132100	117700	123300	127400	110400	114000	93520	118100	140100	102900	97430	116400	124300	146000	114700	105600	118600	111600	113600	133000	125300	112500	105500	117600	134800	121300	92820	81810	84210
PE P-38:1|PE P-18:0_20:1	758.603	4.562	[M+H]+	9904000	10290000	10680000	11720000	9559000	10350000	9660000	6924000	6713000	10970000	10160000	10300000	10270000	10510000	9478000	11190000	9845000	12270000	11330000	10910000	10260000	11980000	11350000	9226000	8484000	7740000	7642000	9721000	9531000	9993000	9342000	8519000	8144000	8930000	8136000	8976000	9533000	10230000	9260000	7640000	10440000	8576000	8001000	9584000	9539000	8078000
PE P-38:2|PE P-18:1_20:1	756.588	4.073	[M+H]+	12590000	13930000	13300000	12510000	12230000	14770000	13230000	12310000	12500000	13020000	12130000	12540000	12930000	13580000	12100000	14180000	14230000	13890000	13610000	13640000	12560000	12980000	12430000	10530000	12480000	15130000	12550000	12780000	12750000	13620000	13430000	11950000	12200000	12670000	13260000	12400000	13520000	14430000	13240000	11610000	12750000	14710000	12300000	11510000	11790000	9726000
PE P-38:4|PE P-16:0_22:4-1	752.557	3.36	[M+H]+	7391000	7317000	7424000	6944000	6681000	9446000	6569000	7724000	7683000	7294000	6790000	6869000	7394000	7893000	6627000	7976000	9062000	8324000	7724000	7268000	6909000	7733000	7402000	5073000	7449000	7696000	6226000	6522000	6845000	7788000	5483000	6572000	6462000	6889000	6949000	6688000	7668000	7393000	6311000	6454000	6593000	8259000	7103000	5278000	5090000	4894000
PE P-38:4|PE P-18:0_20:4-2	752.557	3.546	[M+H]+	7443000	7311000	7447000	6981000	6654000	9416000	6539000	7716000	7672000	7269000	6757000	6835000	7354000	7895000	6629000	7938000	9036000	8308000	7693000	7239000	6943000	7718000	7393000	5102000	7427000	7666000	6194000	6518000	6839000	7774000	5443000	6551000	6452000	6902000	6917000	6664000	7657000	7363000	6301000	6425000	6571000	8219000	7147000	5287000	5112000	4929000
PE P-38:5|PE P-18:1_20:4	750.541	3.081	[M+H]+	3970000	4182000	4033000	4064000	4222000	4588000	4086000	4552000	4331000	4296000	4047000	4320000	4463000	4336000	4009000	4039000	4286000	4354000	4054000	4314000	4298000	4173000	4263000	3761000	4233000	5120000	4512000	4220000	4419000	4761000	4226000	4287000	4269000	4627000	4510000	4494000	4566000	4595000	4425000	4348000	4214000	4638000	4552000	4140000	4251000	4690000
PE P-38:6|PE P-16:0_22:6	748.526	2.765	[M+H]+	14420000	14750000	14580000	15890000	16290000	14320000	13950000	15680000	14250000	16000000	15020000	15930000	16510000	14960000	15030000	13810000	13260000	15900000	14090000	15630000	16070000	16550000	15610000	14080000	13550000	14330000	15270000	15000000	15270000	16950000	15020000	15230000	14480000	16320000	14620000	15010000	14070000	15960000	15850000	14290000	14900000	13620000	15480000	15170000	15120000	18380000
PE P-39:2|PE P-18:1_21:1	770.602	4.322	[M+H]+	184100	204100	194700	190900	173000	181500	250900	125700	125400	174200	165700	194500	187900	191600	171600	188800	178500	206700	200700	198300	171900	183700	163500	158400	136400	177400	143900	133900	155700	175000	229500	142700	142600	145500	149200	155900	155300	178200	180000	111800	169600	177100	157000	144600	136300	120100
PE P-39:6|PE P-17:0_22:6	762.566	3.028	[M+H]+	1310000	1865000	1774000	1314000	1254000	1963000	1884000	1731000	1572000	1440000	1866000	1164000	1419000	1464000	1556000	1660000	1842000	2143000	2050000	1399000	1173000	2009000	1816000	738300	1398000	1625000	1097000	1103000	1174000	1307000	1089000	1145000	1180000	1001000	1454000	1323000	1424000	1402000	1096000	1308000	1171000	1617000	1197000	833200	798800	809300
PE P-40:1|PE P-18:0_22:1	786.632	5.066	[M+H]+	628900	566600	615600	623000	566800	619600	623400	407300	384900	621500	618200	553600	613500	583300	568400	631900	636600	672600	668900	600600	576100	706700	677400	433200	506300	424300	389600	526600	545000	532800	508000	497900	468700	461900	477700	488500	522800	490900	432900	511900	637200	463400	439900	503800	505200	405800
PE P-40:2|PE P-18:1_22:1	784.617	4.598	[M+H]+	3060000	2933000	3350000	3527000	2971000	2977000	3441000	2056000	2092000	3395000	3046000	3081000	3077000	3102000	2718000	3432000	2805000	3822000	3241000	3287000	3122000	3935000	3331000	2734000	2263000	1982000	2144000	2563000	2585000	2771000	3097000	2204000	2206000	2453000	2201000	2309000	2449000	2891000	2621000	1857000	2715000	2354000	2160000	2540000	2521000	2522000
PE P-40:4|PE P-18:0_22:4	780.588	3.918	[M+H]+	8523000	8602000	8656000	8726000	8288000	9364000	7022000	8071000	7697000	9198000	8217000	8792000	8626000	8919000	8221000	8927000	8450000	9662000	8857000	9148000	8769000	8569000	8857000	8156000	9375000	9387000	8785000	9188000	8759000	10380000	7686000	8977000	8773000	9867000	9348000	8818000	9028000	10750000	9528000	8420000	9091000	9808000	9297000	8958000	8652000	8454000
PE P-40:5|PE P-18:0_22:5	778.573	3.755	[M+H]+	134700	119500	108500	122600	132600	121300	159300	113300	110900	128400	122600	131400	127300	137400	138300	103800	114800	134800	126900	126100	141900	138400	129300	139100	132200	150000	145000	154000	140200	155400	166300	137100	144300	142800	166900	145200	129200	169300	150900	135100	147200	156400	149600	148100	149300	165100
PE P-40:6|PE P-18:0_22:6	776.556	3.338	[M+H]+	10100000	12390000	10990000	11280000	11660000	12840000	11480000	12700000	12730000	12080000	12140000	12190000	11630000	12640000	11700000	11610000	12440000	12510000	11780000	11590000	11830000	11740000	12000000	10600000	13130000	14870000	14330000	14430000	13450000	15590000	14150000	13480000	13650000	14540000	15000000	13280000	13600000	14420000	13430000	14570000	13620000	14940000	14110000	13210000	13700000	15180000
PE P-40:7|PE P-18:1_22:6	774.541	2.814	[M+H]+	7256000	7786000	7738000	8022000	8039000	7399000	8043000	8302000	7740000	8312000	7961000	8391000	8279000	7966000	7769000	7455000	7087000	8237000	7433000	8384000	7741000	8197000	7869000	7490000	7310000	9090000	8644000	8368000	8595000	8996000	9318000	8300000	8138000	8467000	8625000	8237000	8527000	8736000	9416000	7795000	8657000	8412000	8624000	8022000	8191000	7726000
PE P-40:8|PE P-18:2_22:6	772.527	2.435	[M+H]+	79770	77480	89060	92530	83920	88880	128000	90700	93080	93580	76650	99170	96890	87550	95920	88350	97740	115700	101200	89980	110600	99100	102800	92740	74950	101100	91510	87930	87270	92860	146300	98220	104200	94900	89080	115000	94750	125700	122300	91090	123100	122600	117900	102400	102500	121300
PE P-40:9|PE P-18:3_22:6	770.512	2.17	[M+H]+	9309	11230	12120	9332	10960	10640	14060	11610	6201	9003	9743	10560	11550	10290	13120	10140	6727	11260	12750	14580	15200	13000	11310	12950	8490	12730	18280	8151	14720	12210	18680	13240	12590	11610	10790	14290	14340	13100	14770	10290	12180	13200	18940	20160	15070	19940
PE P-41:2|PE P-18:1_23:1	798.635	4.839	[M+H]+	98530	109100	107600	99660	94850	91380	137800	73970	77000	107700	102900	103500	102600	110100	99310	99260	99580	107700	102200	115800	100000	92940	100700	96670	87080	96200	85570	84210	93360	107100	148800	86080	88290	102000	91960	96180	101200	108500	94670	77570	101400	91970	87070	93180	94180	72150
PE P-42:1|PE P-18:1_24:0	814.667	5.216	[M+H]+	75420	68410	66450	81630	89410	69580	85690	39610	38100	73630	58330	78170	66860	63690	63270	68500	64270	83260	73860	97130	74960	85380	61260	86670	73350	55190	67800	74570	77420	100000	123400	71660	56840	57970	55040	51900	54360	61360	64070	61840	79450	68010	76020	142500	77660	144000
PE P-42:2|PE P-18:1_24:1	812.651	5.105	[M+H]+	332000	293900	332100	316900	292100	320500	348000	201900	206200	306300	297700	296000	314500	302100	292000	331600	312500	331200	332300	329500	293100	353400	317200	252500	269400	238400	238300	274500	293000	296400	314000	268600	238900	242900	273600	265800	276900	288800	263500	247800	312200	277800	258500	257100	255700	229600
PE P-42:4|PE P-18:0_24:4	808.621	4.333	[M+H]+	332000	352200	332000	353700	334900	332300	311600	279800	267500	384100	354500	378800	318300	362300	346600	344500	302500	392900	351800	358200	353500	349200	364700	432000	359700	384000	376500	374600	380100	435100	364300	364300	372500	402200	385500	381500	389400	461600	435800	330000	408400	427200	411900	410900	413500	446500
PE P-42:6|PE P-18:0_24:6	804.588	3.689	[M+H]+	232500	248700	246500	227400	228700	237600	226800	231600	257100	230100	228800	244100	242100	225800	261100	214800	257100	232900	239700	249400	234400	247600	223600	262400	282200	353400	303100	315100	300100	335500	332600	307900	301800	306700	359300	320800	303800	352300	321100	295900	314100	328000	311500	300500	312500	389600
PE P-42:6|PE P-20:0_22:6	804.589	3.919	[M+H]+	232900	248800	246600	228200	229700	238600	227500	232400	257900	230700	229600	245100	242900	226600	261800	215700	257500	233400	240100	250300	235300	248200	224000	263400	283300	354400	304500	316300	300900	336500	333700	309000	302600	308100	358700	321800	304800	353000	322200	297200	315100	328900	313000	301500	313700	391000
PE P-42:7|PE P-18:1_24:6	802.577	3.181	[M+H]+	95300	122600	106400	107100	100000	121200	97650	114100	111100	100500	96560	104300	102000	105600	92250	112500	117900	116600	105200	109600	91860	104200	102200	95260	114000	150000	115100	109800	123800	126600	119600	114300	107900	113500	115100	109200	124000	121700	118900	107400	113800	140900	124100	102100	98720	99730
PE P-42:7|PE P-20:1_22:6	802.571	3.377	[M+H]+	93640	122800	108200	105200	100200	121200	97840	112100	110900	99520	98100	105500	100500	105900	94500	112500	115900	119400	105400	111300	90310	105300	102700	94500	114800	152100	116200	109400	119300	126900	117200	115300	110300	111400	113300	109600	122200	122800	117800	105600	112600	140400	127400	101400	96590	101700
PE P-44:7|PE P-22:1_22:6	830.6	3.92	[M+H]+	13750	16170	14460	14150	13930	15030	13410	14130	15580	13980	13760	14770	12820	15400	14640	14780	14550	15440	17380	13680	13190	14060	13860	15270	16290	17340	17100	17030	17010	17520	19120	17110	15410	17320	18240	18390	18240	18780	16590	17840	15770	17060	16850	17730	17780	21080
PE O-36:4|PE O-16:0_20:4	724.525	3.158	[M-H]-	4776000	3809000	4468000	5105000	4656000	4072000	4557000	3762000	3530000	4805000	4114000	4616000	4618000	4538000	3897000	4204000	3769000	4845000	4125000	4845000	5033000	5701000	4565000	5425000	3926000	3513000	3630000	3873000	4571000	4132000	4062000	4040000	3787000	3789000	3606000	4193000	4452000	4295000	4290000	3304000	4740000	3738000	4253000	4691000	3935000	4907000
PE O-36:6|PE O-16:1_20:5	720.494	2.585	[M-H]-	25120	18260	18830	31550	28450	19890	31150	39030	35820	32150	20710	24610	24700	18380	20840	19680	14240	23610	16410	21800	35560	29960	25780	45730	25980	7427	24210	29920	25740	26510	35500	22250	29740	24640	25960	32810	29550	27610	24530	18660	25300	19360	36570	42200	28720	47690
PE O-37:6|PE O-17:2_20:4	734.51	2.901	[M-H]-	48590	45430	47320	50190	53560	38300	58680	54600	42330	64860	47260	56950	46290	48620	48330	41100	34920	49780	40490	51500	59680	46280	52170	91020	47760	46230	59950	53870	56800	53050	66230	57120	54940	52470	55470	50800	54070	54460	57280	48800	56750	43140	55490	68810	60020	67980
PE O-38:4|PE O-18:2_20:2	752.554	3.767	[M-H]-	14060000	12160000	13650000	15480000	14080000	12060000	11440000	11190000	10180000	14870000	12700000	14010000	13880000	13460000	12420000	12540000	10830000	14330000	12930000	15320000	14660000	15760000	13750000	16660000	12260000	11530000	11910000	12680000	13520000	12670000	11120000	12500000	11790000	12310000	11040000	12880000	13150000	13230000	13580000	10220000	14480000	10950000	13460000	14920000	12880000	14960000
PE O-39:5|PE O-17:1_22:4	764.559	3.652	[M-H]-	567900	562700	564700	606300	602800	460000	613100	490400	461700	602600	536400	628000	576800	555800	561100	514000	441800	590800	521500	629400	655300	529200	597900	793400	569100	544900	587700	580600	596400	589100	603500	625300	600500	588600	530500	603100	569000	628200	680800	501700	633900	533700	633400	725600	650200	639700
PE O-39:5|PE O-19:1_20:4	764.557	3.851	[M-H]-	567900	562700	564700	606300	602800	460100	613100	490400	461700	602600	536400	628000	576800	555800	561100	514000	441800	590800	521500	629400	655300	529300	597900	793400	569100	544900	587700	580600	596500	589100	603500	625300	600500	588600	530500	603100	569000	628200	680800	501700	633900	533700	633400	725600	650200	639700
PE O-39:8|PE O-17:2_22:6	758.51	2.59	[M-H]-	47430	43320	47570	43920	26890	53530	69710	62190	59500	51430	47980	50340	46150	46750	47930	55760	50280	41050	38920	43100	48490	50680	46480	51080	53100	49700	39360	55470	56960	54840	65850	58740	50270	59550	56000	61120	54590	48620	45120	54110	46010	44860	48210	49610	51260	66070
PE O-42:2|PE O-18:1_24:1	812.645	5.57	[M-H]-	91410	73400	121900	85220	90740	75300	88850	49750	60730	80320	84630	90280	80080	82350	80870	167600	85090	94990	93970	101000	82620	96410	97450	107200	82890	71370	77320	95310	88650	104400	119300	98390	71620	84660	89870	86360	80530	89730	94290	86610	94580	76930	83330	90380	88500	90710
PE O-42:9|PE O-20:3_22:6	798.535	2.912	[M-H]-	71000	67970	63050	68870	73270	65500	72870	48900	44400	74670	74080	81430	72630	65560	73180	66850	64940	67960	68630	66580	83280	59260	72730	83900	66100	50640	71400	65940	64120	73640	77900	68960	68870	75720	64470	75370	61430	68490	70500	66490	68160	57440	69770	78560	76830	87100
PEtOH 40:2|PEtOH 20:1_20:1	783.6	3.925	[M-H]-	448100	402300	422100	540200	457100	403900	425400	417900	421500	485600	425800	437900	478600	421900	394200	425500	383700	455700	412700	479900	463300	503800	449800	520700	358400	303500	356100	434000	401200	376400	354000	381500	369200	396200	343100	380000	359400	393900	410900	322800	419500	325000	367900	452800	407200	448400
PG 34:1|PG 16:0_18:1	747.516	2.104	[M-H]-	21870000	21820000	19210000	29720000	29500000	17450000	19100000	13680000	14370000	25140000	21740000	25680000	21850000	19690000	19900000	18290000	15060000	22380000	18000000	25810000	30400000	21820000	23130000	45870000	21780000	15530000	24670000	27340000	26090000	23120000	24870000	26600000	27490000	23800000	20620000	20720000	19320000	25290000	31050000	19930000	27510000	17930000	21560000	41480000	33760000	33000000
PG 34:2|PG 16:0_18:2	764.54	1.796	[M+NH4]+	15240	12370	9257	29420	13420	12710	14470	11130	6266	22190	15480	25560	16000	27510	18460	25810	12490	18280	18540	16940	21620	15770	28980	23620	10440	15130	20030	14060	18880	21570	22860	35850	22820	20510	18610	20850	23010	20600	19780	14440	35020	17450	19040	27830	24480	27880
PG 36:2|PG 18:1_18:1-1	773.533	2.12	[M-H]-	2709000	3000000	2499000	3748000	3930000	2309000	2546000	2091000	2183000	3441000	2940000	3596000	3027000	2797000	2872000	2509000	2150000	3402000	2478000	3801000	4439000	3007000	3331000	6545000	2967000	2022000	3507000	3591000	3426000	3114000	3696000	3508000	3866000	3425000	2875000	2991000	2636000	3755000	4690000	2829000	3931000	2717000	3595000	6201000	4842000	5231000
PG 36:2|PG 18:1_18:1-2	773.534	1.821	[M-H]-	498200	521200	488800	655200	602000	429600	616000	266300	267300	619400	534400	606100	514200	562000	519100	444300	321700	437300	443600	542000	589200	452800	497500	955700	542100	524600	629000	703200	598300	582700	758600	705600	661700	677800	560500	574800	540300	591100	667000	481700	650800	393200	541700	785800	652200	690300
PG 36:4|PG 16:0_20:4	769.501	1.765	[M-H]-	254300	275100	243700	337500	345000	231600	281300	156200	151600	324900	294100	362000	297200	286100	294800	240800	190300	267900	233700	296300	385800	278600	314800	503100	297000	246100	398400	358100	335400	347200	352600	422300	375800	398500	350900	385200	282800	344900	371400	309000	379500	232500	330600	530500	503600	627300
PG 38:4|PG 18:0_20:4	797.532	2.122	[M-H]-	7847000	7804000	7583000	9737000	10020000	6870000	6978000	7252000	6637000	8893000	7817000	9150000	8429000	7610000	7272000	6697000	5924000	7883000	6744000	9348000	10050000	8080000	8145000	13750000	6955000	6375000	8550000	9203000	9076000	8078000	8442000	8290000	8590000	8191000	7304000	8570000	7125000	8221000	9731000	6872000	9431000	6280000	8136000	12920000	12120000	12930000
PG 40:6|PG 18:0_22:6	821.533	1.956	[M-H]-	78740000	74220000	87440000	102300000	81810000	71640000	69070000	65970000	59290000	88340000	78020000	80240000	86290000	78060000	70050000	78180000	61030000	82720000	75980000	88370000	84460000	99840000	76920000	78040000	48030000	48780000	48940000	55480000	58280000	54970000	49810000	49610000	46900000	50980000	46300000	52660000	55920000	56210000	65380000	39330000	65590000	44250000	55580000	63970000	52960000	66300000
PG 40:7|PG 18:1_22:6	819.517	1.517	[M-H]-	162400	235600	205700	236700	295500	171400	197000	179900	192900	287700	243900	332100	246200	258300	269000	175200	122800	255100	172800	251900	330100	164900	244400	493900	242100	176100	351700	385600	270300	269500	372400	341400	343000	355800	280400	305000	201900	326100	373500	298000	343800	215700	335100	494800	457100	558200
PG 40:8|PG 18:2_22:6	817.502	1.394	[M-H]-	75870	103000	79580	114500	135900	70800	114900	85890	94990	139800	98220	166200	119500	126200	127900	88160	78940	156500	110800	95480	146500	68080	103700	191000	93670	81110	142500	136400	117000	120300	165000	153900	158200	163800	113700	161100	122400	162600	171200	141300	184500	124400	206500	187600	164700	225300
PG 42:9|PG 20:3_22:6	843.513	1.444	[M-H]-	43130	50190	43840	47700	66710	27980	51650	35390	36920	64350	51600	56910	57570	55890	55760	32150	31370	54200	42580	49950	76710	35510	54310	102900	58080	51140	76240	68830	54480	56070	70250	64910	75190	80020	57100	71070	50060	69410	69720	64610	68380	41740	75650	107800	98770	126500
PI 32:0	828.551	1.944	[M+NH4]+	64670	48880	68410	81330	75250	53200	72230	77640	52240	89310	62830	110800	96080	81540	135200	63340	60570	104100	82340	67860	78530	85220	70390	81570	45900	51580	71430	64200	66630	70530	108300	76050	70810	69170	56650	93230	65710	87240	89900	54840	88110	70370	111900	77120	59340	109600
PI 34:2	852.553	1.842	[M+NH4]+	117500	118900	124600	216600	219100	109000	165400	966200	844700	155300	126400	217600	190700	197200	204600	187000	209000	281500	173400	222000	202400	159500	162100	190200	97760	128000	159200	122400	158800	146400	218000	145000	150800	144000	131500	167800	164500	225900	272600	132500	217400	205800	296300	212700	157200	283100
PI 36:1	882.598	2.328	[M+NH4]+	386200	452100	400200	448900	506100	381200	414000	395800	362700	510400	472900	506000	424500	452100	480900	372300	333200	383200	354100	455500	498800	409500	438000	704600	541200	555200	719400	600200	612200	567600	593300	678900	633900	602200	662000	573800	560800	689200	663700	519500	566400	525100	581400	765600	672300	780500
PI 36:2	880.588	2.054	[M+NH4]+	1734000	1603000	1472000	2220000	2127000	1553000	1628000	1499000	1270000	2093000	1683000	2238000	1863000	1695000	1585000	1703000	1227000	1686000	1527000	2265000	2196000	1697000	1796000	3390000	1856000	1587000	2479000	2041000	2274000	2384000	2735000	2498000	2273000	2509000	2047000	1963000	1734000	2501000	2770000	1905000	2317000	1789000	2359000	3292000	2831000	3404000
PI 36:4|PI 16:0_20:4	857.517	1.726	[M-H]-	3126000	3696000	3296000	3075000	3232000	3278000	3244000	589200	727600	3491000	3687000	3490000	3391000	3310000	3535000	3158000	2562000	3257000	3018000	3321000	3618000	3124000	3663000	3598000	4102000	3664000	4371000	4158000	3542000	4364000	4390000	4750000	4199000	4525000	4488000	4329000	3591000	4115000	4243000	4117000	3637000	3574000	4037000	4214000	4810000	5020000
PI 36:5	874.541	1.563	[M+NH4]+	2780	4790	6844	3683	3780	2987	3531	5838	0	6313	6137	7039	3350	3661	5512	5219	2689	3452	3374	3523	5422	5288	4160	8235	4160	5655	9227	5710	4361	5542	7163	8190	6902	8028	6325	6227	4018	6369	6312	4656	4041	3761	7629	6555	5987	15800
PI 37:4	895.528	1.885	[M+Na]+	2699	2543	6391	3332	2230	3693	4019	8295	3457	5634	4727	5668	2967	3506	5821	12400	3080	3746	3629	3427	3099	3086	2695	2956	4161	3094	4578	2152	3628	3902	4015	4022	3425	4726	5058	4833	2980	3646	3803	3907	4856	2859	3008	2423	5639	5819
PI 38:3	906.6	2.196	[M+NH4]+	321900	348400	358800	315300	314600	322700	326500	186600	167400	334300	344900	333700	323000	324100	350100	320500	333500	321100	330600	336700	341700	338300	367600	398800	420300	375800	435200	390900	407300	410400	460900	461800	423000	431900	422100	446800	375900	434400	383900	426700	388200	353300	410900	431500	486700	548200
PI 38:4	904.59	2.032	[M+NH4]+	1416000	1713000	1795000	1198000	1086000	1601000	1461000	381700	430100	1336000	1503000	1259000	1466000	1540000	1554000	1518000	1808000	1546000	1788000	1424000	1342000	1539000	1754000	1238000	2060000	1933000	2034000	1796000	1692000	1844000	1851000	1963000	2050000	1998000	1926000	2120000	1725000	1732000	1290000	2188000	1680000	1731000	1931000	1523000	2014000	1438000
PI 38:5|PI 18:1_20:4	883.534	1.763	[M-H]-	5531000	6173000	5864000	6040000	6006000	5354000	5921000	1018000	1273000	6400000	6273000	6556000	6119000	5972000	6174000	5569000	4463000	5837000	5397000	5701000	6442000	5567000	6082000	7063000	6286000	5665000	6908000	7032000	6005000	6881000	6847000	7248000	7018000	7534000	6631000	6857000	5942000	6862000	7026000	6404000	6513000	5494000	6775000	7681000	7768000	8882000
PI 38:6|PI 16:0_22:6	881.516	1.634	[M-H]-	3278000	3719000	3234000	3318000	3520000	3215000	3228000	699000	869900	3490000	3493000	3579000	3314000	3240000	3449000	3296000	2632000	3359000	3246000	3198000	3483000	2926000	3359000	3853000	3923000	2860000	4004000	3887000	3640000	4158000	4242000	4697000	4378000	4255000	3930000	3838000	3179000	4070000	4495000	4152000	3782000	3494000	3796000	4018000	4143000	3512000
PI 39:6|PI 17:0_22:6	895.53	1.752	[M-H]-	36140	50210	45740	37280	40120	40460	53250	7205	8768	50390	43620	48580	41780	43590	43140	40760	36470	42260	39370	45010	42070	26300	44140	21090	50600	35710	48550	27810	20060	46860	68460	63700	57270	48130	48910	54870	43030	23450	58120	52030	52550	52850	48240	56340	54140	52860
PI 40:3	915.591	1.657	[M-H]-	51300	41390	42250	64520	59010	50240	59790	61990	56460	46920	39250	41290	40050	39120	43960	41940	25350	36880	38520	48510	48000	46330	42190	69400	33880	46850	36980	53030	51670	34080	37770	41890	38550	34520	45180	33790	45740	39310	26870	69490	86870	60530	68570	50600	48250	32490
PI 40:4	932.618	2.281	[M+NH4]+	7646	8112	13270	4138	7739	10830	9940	1672	3334	7986	11590	5911	7295	8469	10140	14860	11460	12410	12250	6515	7696	9489	9108	6295	18490	13320	13650	15930	11830	12300	8605	14000	12880	9276	22140	13780	14490	9748	9275	15950	11640	17350	10310	8295	13190	6136
PI 40:6|PI 18:0_22:6-1	909.547	2.117	[M-H]-	6668000	6789000	6169000	6464000	6446000	5995000	5718000	1286000	1493000	6299000	6415000	6828000	6353000	6171000	6674000	6669000	5371000	6309000	6555000	6267000	6766000	5658000	6778000	6790000	7531000	5713000	7454000	7185000	7269000	7931000	7616000	8703000	8275000	7659000	7398000	6864000	6572000	8238000	8009000	8187000	7534000	6698000	7256000	8394000	8188000	6268000
PI 40:7	926.575	1.678	[M+NH4]+	55240	50980	49630	55730	48820	55400	54600	13840	14890	50350	60410	54420	49110	48580	52900	61810	40620	43750	42270	51520	56510	57490	60700	50440	51900	55180	74580	51310	61940	61930	74100	79600	64230	64480	65780	67820	62150	63620	53980	48130	64320	48100	59330	63630	61290	74350
PI 40:8|PI 20:4_20:4	905.519	1.525	[M-H]-	133600	125400	115200	158200	169800	112000	131000	43680	45010	150400	132900	160600	137000	131000	130800	110100	99960	139700	132700	117700	139200	122100	121700	203400	134200	135100	162600	176300	143900	154800	164000	181300	157700	165600	138000	166400	128800	158100	170200	141200	169900	136500	165800	179800	168800	243100
PI 42:10|PI 20:4_22:6	929.518	1.457	[M-H]-	45340	51080	50320	48390	63950	45950	49100	23320	26370	62780	57380	69910	54600	54770	57670	50920	35750	52240	49480	49270	58950	46950	49650	90750	55200	55540	76510	71200	61540	63950	83500	72540	74810	83650	67920	71610	58420	70650	72110	73900	76740	57300	84050	89750	84580	127600
PS 32:1|PS 16:0_16:1	734.494	1.801	[M+H]+	2248	2929	2073	2215	1512	2588	4120	8819	7949	4507	2098	3725	3546	3426	3336	2614	2977	2975	2342	2514	2066	3622	3845	2145	4039	4082	3501	2289	2805	1122	2344	2980	1335	3513	3563	3461	3901	2700	1364	1887	2330	3217	3470	1805	2104	3377
PS 35:1|PS 17:0_18:1	776.544	2.27	[M+H]+	145000	166500	168600	145800	134700	153300	116600	80900	65740	155300	153000	160300	104200	162400	162100	156600	155100	153900	125300	137500	135700	98210	146000	149000	145400	133700	146400	154500	169900	139000	112000	129100	148100	153600	127700	160400	166100	146300	154100	139200	150900	139600	147100	135100	137700	121700
PS 36:2|PS 18:1_18:1	788.543	2.149	[M+H]+	13350000	14020000	14480000	13000000	11570000	14700000	13320000	415900	366600	13180000	13310000	12900000	13460000	13710000	13980000	15620000	15980000	14150000	15310000	10490000	11150000	12770000	12470000	10310000	14200000	12760000	13260000	14290000	13910000	13980000	11360000	14900000	12820000	13200000	14570000	13630000	13550000	13920000	12440000	14300000	13590000	14710000	12810000	10370000	11380000	9706000
PS 38:2|PS 18:1_20:1	816.57	2.522	[M+H]+	976300	1044000	1190000	793100	723900	1449000	904900	177200	185500	778600	926300	740600	976400	950700	966300	1318000	1679000	992500	1268000	670800	617900	945500	802700	363900	936500	829600	652300	859600	848400	725400	546900	860100	691500	675900	855300	793200	968700	718900	580200	894000	759700	972000	629600	431700	483900	314100
PS 38:4|PS 18:0_20:4	812.533	2.144	[M+H]+	7558000	8401000	7559000	7488000	7503000	7228000	8109000	1329000	1284000	8595000	8334000	9030000	8031000	8282000	8503000	7730000	7254000	8464000	8356000	7230000	7910000	7081000	8413000	8801000	8772000	8780000	9245000	9177000	8838000	9727000	9062000	9677000	8935000	9455000	9081000	9330000	8186000	9185000	8679000	9097000	9361000	9003000	9287000	9422000	8895000	8955000
PS 40:6|PS 18:0_22:6-1	836.541	1.999	[M+H]+	31690000	34740000	30110000	34540000	35870000	31800000	32570000	3479000	3064000	37550000	36570000	40020000	36950000	36010000	39130000	32600000	29950000	33500000	33770000	31180000	35520000	29690000	34530000	42720000	41050000	39730000	45980000	46390000	43360000	45450000	40760000	48580000	44720000	48400000	46760000	45850000	39330000	43900000	43020000	48740000	44290000	41020000	43200000	45220000	49420000	51690000
PS 40:6|PS 18:0_22:6-2	836.545	2.126	[M+H]+	29290000	31490000	27230000	31850000	33070000	29830000	29740000	2041000	1819000	34830000	33300000	37530000	34660000	33760000	35820000	30260000	28450000	30340000	30780000	28510000	32880000	26740000	31240000	39380000	39190000	38150000	43640000	44190000	41350000	43010000	37740000	46230000	42450000	46440000	44300000	43960000	37660000	41480000	39910000	46760000	42080000	38920000	40770000	42200000	47120000	48380000
PS 41:6|PS 19:0_22:6	850.553	2.149	[M+H]+	84730	105900	101600	92650	93790	86370	81430	17000	12030	106000	116200	118500	105500	108100	127900	99500	86930	98490	99040	89320	110900	90090	107400	119100	116400	132900	150800	139800	125400	123300	96280	148900	128200	141500	152200	132500	121800	137400	127300	147700	131900	122100	132000	136700	146500	139200
PS 42:10|PS 20:4_22:6	856.51	1.533	[M+H]+	134600	153900	108900	148700	179800	108900	137900	5702	0	204900	161000	197000	176700	160500	191700	131000	110400	168400	147500	137600	192300	116900	172200	202600	137500	116900	171300	154900	136200	168600	155400	156300	163700	188700	145400	160600	118400	177300	189100	157800	160700	138900	216600	188600	181800	280700
PS 42:8	882.531	1.502	[M+Na]+	618100	685600	562100	803200	785200	553900	563400	0	12270	859500	672900	851300	720100	651300	700900	614500	441800	678700	631400	722000	807500	627700	689400	1127000	660100	520000	845900	772200	686600	863900	894500	881200	791600	949600	721000	734500	570700	907300	1024000	740600	790900	636600	953100	998700	914700	1324000
PS 44:10|PS 22:4_22:6	884.538	1.693	[M+H]+	3010000	3631000	2990000	3508000	3706000	2774000	3053000	73010	61310	4049000	3426000	3952000	3608000	3313000	3753000	2758000	2083000	3457000	3025000	3349000	3690000	2967000	3599000	5017000	3333000	3097000	4412000	3822000	3505000	4009000	3446000	4377000	4065000	4359000	3865000	3594000	2939000	4270000	4391000	3412000	3787000	3369000	3991000	4643000	4602000	4784000
PS 44:12|PS 22:6_22:6	880.511	1.46	[M+H]+	2259000	2767000	2169000	2763000	2954000	2025000	2260000	35510	27540	3190000	2563000	3214000	2680000	2468000	2783000	2380000	1644000	2887000	2517000	2886000	3021000	2384000	2705000	4194000	2479000	1916000	3186000	2812000	2431000	3215000	3534000	3232000	3099000	3596000	2604000	2691000	2030000	3432000	3838000	2904000	3017000	2486000	3697000	3864000	3372000	5113000
PS 46:11|PS 24:5_22:6	910.554	1.757	[M+H]+	57920	56800	55320	62970	69070	50050	56680	4080	5210	76940	58970	64610	57720	57310	58200	57400	38730	54500	51730	58200	63950	59010	62020	96130	58760	52780	72970	61300	68250	75370	76450	79630	70170	83300	65030	64590	55420	76400	79630	56980	67490	57180	68490	81740	83200	106000
PS 46:12|PS 22:6_24:6	908.542	1.609	[M+H]+	176000	186000	164600	192100	201900	157800	171400	23970	28380	213100	184500	193100	182900	177800	178000	184200	117400	179000	160000	186400	208200	187200	195100	258000	175400	168700	217000	185800	184600	208500	220800	220600	194700	211600	191100	187100	157700	222000	234200	176700	191600	163200	199900	236900	232800	334500
SM 31:1;2O	661.524	1.961	[M+H]+	13570	11420	13430	17170	13910	9128	13300	9466	6987	17930	11570	13550	15480	15570	11620	11290	8841	10810	10330	13720	14540	11590	12390	13730	8127	9851	8591	10420	10980	8553	7311	9565	8676	8968	9941	11230	8933	11990	10030	6010	13110	8671	9281	13490	13240	13420
SM 32:1;2O	675.541	2.12	[M+H]+	883400	814500	906100	1004000	830400	785500	892200	453500	370600	980000	776200	820000	880500	818600	721600	814900	647200	864600	844200	884400	901000	990000	882300	614500	398400	454300	441200	478400	455600	512300	447100	429100	358900	438300	384400	419600	461900	433300	450700	298500	448100	361200	494100	410500	388300	551300
SM 32:2;2O	673.524	1.848	[M+H]+	9794	9825	10050	14450	10590	7181	7515	6938	4936	16500	9691	13360	12180	10150	9674	9349	9311	10460	12830	12160	13780	11490	13210	13830	4623	6122	6222	6881	5879	6460	4628	4782	5325	6980	6117	4823	7100	6470	5760	3641	6562	3348	7259	7111	5404	10810
SM 33:1;2O|SM 17:1;2O/16:0	689.556	2.282	[M+H]+	84330	90410	70990	83820	87040	69540	135900	66840	60550	128500	75640	88600	85420	77920	88340	68460	73390	99260	72590	85750	125100	70740	110900	68420	60930	48840	61710	53560	46630	63850	78950	62500	47540	58140	63070	54280	50640	54340	53200	42190	49370	40460	78430	54700	45850	70170
SM 34:0;2O	705.585	2.66	[M+H]+	678500	752300	656900	692600	671500	739200	1023000	440100	372100	983200	656100	658900	733400	723400	661300	621000	811400	846800	774000	778800	898100	645000	870200	451400	547400	622400	542000	590000	524000	574300	592800	582300	464600	480900	576900	451700	559600	540800	477600	447600	515800	483300	630800	461000	430700	450600
SM 34:0;3O	721.582	2.27	[M+H]+	71730	84520	66340	100200	93140	62800	107100	56400	51290	118200	84970	89910	78920	85510	83460	70670	79370	109000	75960	91670	121200	68490	108000	118300	106900	115700	127200	173900	120000	110500	136600	139800	114800	115100	113900	111000	103800	123300	127100	130600	130300	103100	112900	136800	146200	146500
SM 34:1;2O	703.573	2.492	[M+H]+	5585000	6089000	5227000	5328000	5215000	5639000	7202000	3523000	3015000	7426000	5186000	5160000	5715000	5896000	5226000	4920000	5780000	6669000	6306000	6039000	6969000	4944000	6705000	3512000	4419000	5075000	4201000	4664000	4459000	4582000	4480000	4478000	3781000	3945000	4553000	3641000	4681000	4250000	3787000	3480000	4105000	3962000	5187000	3456000	3454000	3663000
SM 34:1;3O	719.572	2.329	[M+H]+	24350	17430	18990	16150	26360	16180	56220	16490	11250	69700	25530	28670	24620	29770	31270	15520	46710	50450	20120	26470	67310	19530	52220	31690	34660	41740	40380	35240	40740	37580	28370	34760	38260	33820	31640	42770	48060	33490	27140	22720	35500	37920	30610	31650	34100	38070
SM 34:2;2O|SM 18:2;2O/16:0	701.561	2.169	[M+H]+	462300	467200	436700	511600	472800	383200	512900	353200	290700	857600	433900	562100	493300	519700	508800	392300	433500	647700	428700	541800	1028000	420600	709100	653300	477200	473400	519000	453100	454500	525500	496100	489900	495900	486000	591400	485800	496700	505800	479300	351900	456600	423400	760200	775300	477300	660000
SM 34:2;3O	717.554	2.051	[M+H]+	33090	32750	33490	34400	32910	23570	39010	24710	25440	72370	29120	37800	32800	29360	35450	25230	34280	52610	25460	35020	78010	30970	53360	53220	31370	39980	35110	35210	43830	41870	26950	36680	33570	29830	34960	37680	45340	44500	41590	23310	47420	35130	41260	40350	36510	52070
SM 35:1;2O	717.583	2.749	[M+H]+	327700	333100	289000	288300	337300	277600	491300	239800	193000	380700	338700	346900	347400	297300	347500	264400	270100	355800	309100	309900	356300	292900	369000	212500	238900	255400	277400	283700	236800	260400	360300	263200	237200	252700	270500	238200	221500	246900	226500	228300	250300	206900	259500	237900	276000	266200
SM 36:0;2O	733.615	3.202	[M+H]+	521400	558000	492600	459700	526800	713300	710000	321200	249100	620100	618500	520000	577100	612500	574300	556000	881500	629300	699700	520600	515600	623600	579500	241200	523100	506400	433600	593200	453900	436000	424300	477300	417100	433200	507900	397100	452900	371900	335300	554100	438100	425100	366100	356400	418200	310900
SM 36:1;2O|SM 18:1;2O/18:0	731.604	2.997	[M+H]+	1732000	1987000	1644000	1420000	1739000	2625000	2324000	1365000	1157000	1960000	2084000	1791000	1899000	2219000	2051000	1849000	3184000	2128000	2325000	1658000	1700000	1950000	1976000	959400	2377000	2577000	2058000	2427000	1951000	1914000	1818000	2102000	1940000	1920000	2367000	1869000	2147000	1639000	1426000	2745000	1933000	2110000	1752000	1372000	1805000	1507000
SM 36:2;2O|SM 18:1;2O/18:1	729.59	2.582	[M+H]+	3611000	4040000	3689000	4041000	4101000	3429000	2675000	3941000	3722000	4210000	4014000	4498000	4152000	4148000	3757000	3165000	3007000	3576000	3458000	4188000	4511000	3578000	4063000	4725000	3929000	5677000	5224000	5174000	4384000	4677000	2904000	4237000	4581000	4880000	4802000	4991000	4432000	4584000	4357000	4240000	4766000	3988000	4419000	5341000	6783000	5496000
SM 36:3;2O	727.572	2.242	[M+H]+	45510	42640	42750	49710	41450	33730	39010	36680	31420	50920	36890	47290	44210	39400	39950	37160	29900	41970	36050	45080	50470	45990	40970	46750	26550	39680	36430	33340	34870	33180	31910	32220	31120	34940	28190	37440	33300	35990	37250	28590	34920	27800	34710	39560	44430	46350
SM 36:3;2O|SM 18:1;2O/18:2	727.566	1.885	[M+H]+	32560	33400	39130	34780	33620	30140	37210	14260	10400	37390	40790	38380	33470	35050	42140	30380	28730	38910	41140	31690	27120	40830	36840	33530	36430	33580	37580	47560	41360	36810	28960	45930	44850	40380	38380	41020	36170	33200	34100	46470	41010	34390	24280	42630	45560	41260
SM 38:1;2O|SM 18:1;2O/20:0	759.634	3.572	[M+H]+	241300	283100	206000	204200	252700	306400	308600	127900	95030	324100	294100	255000	266800	293500	333600	236700	455800	312900	312800	240400	266400	282900	311600	135400	343100	271500	300500	389800	313900	218800	242900	300900	290200	328900	261400	235100	215700	199100	158400	416300	279400	201400	218700	191700	266200	149800
SM 38:2;2O|SM 18:2;2O/20:0	757.621	3.162	[M+H]+	74510	85090	85360	78510	81660	112000	83450	89970	81200	108400	84820	82550	91130	84870	81130	83130	116800	88790	90150	79360	99690	83830	90450	51870	96580	67160	66100	85570	62080	82280	92280	70980	91570	82380	123600	69240	67680	77510	61650	81980	58090	85760	106900	114700	67630	57290
SM 39:1;2O	773.648	3.93	[M+H]+	253700	184400	194300	241100	254100	275100	225000	199400	179300	283100	192600	267800	248500	252500	199300	229800	235500	237200	212000	286300	261600	193700	210400	199400	209900	176900	203900	239800	215200	212700	219900	226600	198800	260400	188900	181400	199800	221400	211100	210700	216200	184600	172800	233600	197000	158800
SM 39:7;2O|SM 15:2;2O/24:5	761.559	3.027	[M+H]+	2673000	3952000	3678000	2715000	2624000	3871000	3760000	3610000	3313000	2900000	3995000	2314000	2853000	3000000	3351000	3404000	3571000	4446000	4286000	2841000	2434000	4252000	3688000	1493000	2776000	3287000	2228000	2306000	2465000	2630000	2250000	2324000	2186000	1952000	2926000	2666000	2744000	2830000	2142000	2543000	2392000	3198000	2463000	1643000	1618000	1700000
SM 40:0;3O	805.676	3.895	[M+H]+	13910	13520	10700	15160	16230	14460	20420	9604	4718	21480	17410	19940	18210	19410	19140	13690	21760	19550	18840	15210	22770	15320	22390	21830	32140	24320	32050	39440	27870	19760	26500	30150	24280	26210	25250	21170	23670	19780	19620	41990	30550	15580	22270	23760	29780	24030
SM 40:1;2O	787.663	4.189	[M+H]+	634200	666000	532300	602000	774500	625900	655800	262500	195600	838200	785000	661000	661000	733200	781300	579400	923200	857900	865600	671900	723800	912000	810600	430400	577200	506700	492200	808900	639400	481700	435200	547600	474200	535100	470500	403600	461800	385300	350900	656400	620700	362400	431300	510200	495600	322500
SM 40:2;2O|SM 18:1;2O/22:1	785.65	3.726	[M+H]+	1567000	1508000	1599000	1415000	1299000	2015000	1893000	1231000	1134000	1496000	1447000	1164000	1451000	1412000	1225000	1666000	1899000	1644000	1620000	1374000	1295000	1767000	1463000	518500	954200	762400	702800	909500	786200	839700	1101000	722800	895300	806200	1134000	696400	788200	836200	662500	766500	707800	906500	879100	995100	589000	483200
SM 40:7;2O|SM 18:2;2O/22:5	775.565	2.116	[M+H]+	74110	69670	71940	84200	73420	59900	63730	64660	48790	89490	75170	78340	71980	68160	68120	65410	47090	107900	63130	69970	87440	83100	78470	86390	58790	58210	66670	71760	63370	65340	70340	78500	69020	79590	65250	67900	59820	87060	79900	52690	67130	65530	73820	84830	82100	103700
SM 41:0;3O	819.692	4.193	[M+H]+	4962	2103	5273	5524	7850	9306	2929	11280	12170	7233	4251	8972	6094	6209	5269	7560	10180	5543	3915	7335	8855	2782	6115	8979	7951	8472	8492	8007	7808	8437	7784	8538	6584	10350	8293	6931	7924	9358	7596	8679	7299	9080	6371	7116	7948	7541
SM 41:1;2O	801.68	4.542	[M+H]+	203700	186300	156700	231600	229500	167500	199500	96870	77050	276600	220500	245600	195000	245800	218300	167300	200600	250600	211500	250200	247600	229000	231000	242400	180100	131100	167500	279100	215800	167400	178400	206400	170700	204100	128700	131200	149800	163900	157900	193900	233200	109100	137100	234300	206600	135000
SM 41:2;2O|SM 18:1;2O/23:1-1	799.664	4.029	[M+H]+	1451000	1482000	1490000	1531000	1448000	1549000	2081000	1175000	1016000	1615000	1360000	1402000	1445000	1414000	1293000	1433000	1406000	1591000	1451000	1569000	1495000	1586000	1433000	974500	1017000	1014000	1007000	1154000	1033000	1175000	1514000	1043000	1002000	1156000	1023000	910700	975400	1151000	1064000	974300	1068000	1037000	908400	1069000	966400	815100
SM 41:2;2O|SM 18:2;2O/23:0-2	799.666	3.886	[M+H]+	1427000	1444000	1452000	1505000	1415000	1520000	2037000	1146000	985800	1588000	1334000	1373000	1415000	1387000	1260000	1397000	1379000	1551000	1415000	1539000	1468000	1545000	1400000	953900	996500	988900	984900	1134000	1013000	1150000	1484000	1023000	979700	1134000	999400	889300	952000	1126000	1041000	954800	1044000	1014000	888700	1047000	946700	796600
SM 41:3;2O	797.654	3.408	[M+H]+	8652	9430	8775	8515	9846	12110	17020	12550	10940	13950	9261	7978	11900	10090	9274	9665	14210	13910	8010	11040	11930	9696	11470	5048	7952	7425	6566	8665	8397	8631	8460	5842	6753	5920	6295	8124	7674	8893	6707	7124	6821	8460	5475	5924	4112	3755
SM 42:1;2O	815.696	4.759	[M+H]+	338400	339900	282200	428400	422700	252100	387100	99410	6362	553100	435000	440200	367400	433400	450900	288200	395600	572700	460500	430600	499800	590400	511500	422700	369700	279400	314500	575900	491400	287700	314900	383700	304100	339600	249000	256600	294500	280300	286100	385500	526400	180900	249500	408600	384400	301000
SM 42:1;3O	831.686	3.886	[M+H]+	92470	100300	93230	101200	105200	103300	142200	73460	67400	157700	111900	112700	109300	112300	115900	99870	122800	144600	110100	106600	161700	107200	137300	106000	140200	117600	134300	132600	133600	137500	138000	136100	132700	134600	136100	128100	136100	129600	124600	156200	139000	128800	136700	128400	124100	163800
SM 42:2;2O	813.677	4.156	[M+H]+	23990000	25970000	24480000	25310000	25300000	26840000	27590000	20860000	19220000	27250000	25120000	23660000	25000000	25930000	24410000	24920000	25920000	29350000	25760000	25150000	25540000	29540000	25440000	18300000	20190000	20490000	20500000	23490000	20980000	22960000	22210000	19580000	20030000	22490000	21020000	18160000	19650000	23950000	21150000	20260000	21360000	22700000	20400000	19970000	20200000	19700000
SM 42:3;2O	811.664	3.7	[M+H]+	1229000	1047000	1086000	1136000	1104000	1471000	1848000	1052000	913200	1482000	1130000	1087000	1127000	1151000	1035000	1209000	1400000	1615000	1203000	1157000	1459000	1334000	1358000	817700	1028000	906200	872300	928600	1037000	1116000	1102000	984600	914300	979300	1029000	932600	969600	1110000	943300	894900	950000	1258000	908100	840700	848100	721900
SM 42:4;2O	809.657	3.24	[M+H]+	23780	18170	19130	18370	19900	26650	34860	23740	18500	34110	19220	17930	23320	20690	20160	20550	32850	36100	25380	19990	38670	24510	30100	15700	19690	21570	13100	15080	19380	20050	15370	19920	16990	15620	17240	18640	26720	21140	18520	11980	19840	26400	16730	14470	10710	15040
SM 43:2;2O	827.7	4.596	[M+H]+	307600	319700	290200	355700	330300	379600	367300	373500	376700	390300	299700	358400	317600	353700	297000	346600	326300	331400	277100	352500	378000	298300	324700	366900	409300	315000	342000	414200	390700	436400	476300	412400	398700	428800	372500	391900	423300	403600	360300	438400	428900	375000	325100	431500	441000	345900
SM 43:2;2O|SM 18:2;2O/25:0	827.693	4.428	[M+H]+	488300	508700	477100	543900	488600	656100	567600	730600	739200	590300	469800	557200	490200	553300	471800	598600	534500	502600	459100	524900	555800	448700	507400	555500	708500	553700	578900	658600	648000	749800	781400	680800	686300	679600	664000	747200	745100	678900	625700	760300	689800	689800	566000	693800	717100	567000
ST 27:1;O	369.351	2.137	[M+H-H2O]+	15690000	14060000	15540000	20040000	16700000	11900000	14120000	17050000	14460000	17480000	14380000	17020000	15650000	15140000	12760000	13780000	10950000	17020000	13530000	19270000	17590000	16310000	16210000	20490000	10370000	12600000	12970000	12760000	13970000	13950000	13940000	11710000	12000000	12040000	10990000	11930000	11840000	14810000	17270000	9207000	15270000	11530000	13500000	18930000	15320000	17330000
ST 27:2;O	367.335	1.811	[M+H-H2O]+	210900	176000	218300	249700	223100	180100	188300	167600	151700	221700	187400	234600	212600	210100	203400	200900	170200	219000	192100	241500	210900	242900	223600	251300	149900	176300	183200	166100	188900	195900	187200	176900	186500	187000	168400	185100	179800	185400	221800	140200	209000	166200	186900	224100	183000	251000
ST 28:1;O	383.367	2.272	[M+H-H2O]+	1348	2178	2771	1767	891.1	1302	1810	2462	2760	1729	2106	2446	1707	2495	2393	1535	1624	822.3	1407	3592	2801	1749	1338	2171	3782	2117	2927	1050	1415	2674	2060	1427	2635	1995	1850	1088	2367	1358	2508	1713	1760	3131	1102	3089	1834	3928
ST 28:2;O	399.359	1.818	[M+H]+	35640	32710	28680	42320	33980	32310	33450	30630	27940	36620	32790	40100	36730	40590	31880	32780	31080	36760	32990	41110	38620	46950	36110	34810	21440	30250	29160	26430	31550	29280	28490	34540	27710	27320	28020	26840	31810	29780	27100	20580	37360	28490	23730	34640	30350	39260
TG 24:0|TG 8:0_8:0_8:0	488.392	1.93	[M+NH4]+	4908	3733	2881	2637	1988	2860	889.3	3831	2474	6022	2416	3850	3678	1364	8196	2050	789.5	1856	1459	1201	606.4	1747	1481	1711	1255	6455	2370	500.4	6167	1598	2232	2265	2003	2465	3004	3811	1793	3706	3077	616.3	1280	1232	878.9	782	1011	1273
TG 36:0|TG 10:0_12:0_14:0	656.578	4.915	[M+NH4]+	1697	2219	2832	1083	3477	850.9	2925	939.5	1933	2729	1698	1930	1643	2822	3342	324.5	2689	1909	1285	3921	9031	4617	1703	561.1	128.4	3522	2928	481.7	0	258.5	515.2	296.3	1570	1312	478.8	521.3	734.9	1995	902.6	500.7	428.8	1821	770.4	1315	1428	972
TG 38:1|TG 8:0_12:0_18:1	682.594	4.985	[M+NH4]+	2471	5140	7473	4407	7754	1522	5003	481.2	2373	1228	1210	1815	961.8	1441	445.5	241.7	577	689.4	395.7	7139	15700	10640	3762	3513	2106	1559	8443	2242	1870	1967	1272	1071	840.3	372.4	996.5	1024	367.8	640.1	498.3	359.3	609.8	412.2	756.4	1972	1121	1754
TG 40:0|TG 12:0_14:0_14:0	712.643	5.805	[M+NH4]+	260.7	212.5	589.8	511.6	685.1	282.6	331.7	288.3	1029	612.4	411	475.2	431.2	385.2	264.9	151.8	675.8	688.8	296.2	551	2052	270.4	156.3	746.5	251.3	427.2	627	473.1	627.4	369.3	190.1	114	493.4	404.2	155.4	420.5	242.8	149.5	286.4	219.8	264.8	414.2	265.5	185.2	73.85	278.9
TG 40:1|TG 8:0_16:0_16:1	710.625	5.457	[M+NH4]+	793.8	1694	3952	2079	3055	627.7	1668	505.6	168.6	187.8	207.4	1119	295.4	583.2	330.9	168.6	95.07	177.6	268.1	2533	7316	4714	862.3	1748	273.7	189	5247	634.6	285.5	78.5	0	0	326	346.2	249.9	264.6	160.9	329.8	196.8	77.22	430.6	226.8	256.9	336.7	217.3	206.7
TG 40:2|TG 8:0_14:0_18:2	708.609	5.043	[M+NH4]+	611.5	2845	3959	2718	4542	405.7	1251	183.5	139.1	426	272.6	513.9	453.5	260.2	409.9	97.31	126.4	266	32.76	2099	9637	3952	875.3	2476	816.9	107.2	2596	1142	652.9	197.9	190.2	327	96.47	229.3	285.7	127.6	82.56	271.9	164.1	304.4	227.2	123.3	112.4	308.4	353.5	92.86
TG 41:2|TG 8:0_15:0_18:2	722.627	5.281	[M+NH4]+	836.2	1557	1858	1802	1569	508.9	1597	473.3	652.5	697.9	2984	1495	317.6	560.7	1863	3596	346.8	791	1567	1054	651.3	996.2	819.6	819.8	1283	471	913	1129	1137	1678	2155	1749	294	1625	1113	731.1	1272	619.5	662.8	817.8	651	205.8	871.9	2161	664.2	1254
TG 42:0|TG 12:0_14:0_16:0	740.672	6.212	[M+NH4]+	264.3	397.6	521.3	1076	1284	227.2	395.7	454.4	97.84	132.3	398.3	686.2	839.9	364.9	380.5	192.4	507.3	87.01	309.2	225.1	1114	463.4	255.8	1298	556.4	777.7	641.9	890.1	311.7	111.8	331.1	88.97	703	121.6	98.37	569.5	90.82	326.5	170.7	479	218.5	176.3	98.94	167.9	292.1	46.61
TG 42:1|TG 8:0_16:0_18:1	738.656	5.87	[M+NH4]+	1477	4004	3930	4910	4207	1496	4933	2234	1243	1421	2043	2704	945.9	2687	2334	2535	2868	1508	1264	5014	3999	4213	2376	4456	911.1	1338	5788	1485	3257	961	1439	2364	3405	2207	1724	2165	1700	1357	1514	1015	1745	1382	1248	2579	1443	1950
TG 42:2|TG 8:0_16:0_18:2	736.64	5.497	[M+NH4]+	1070	606.6	1838	1278	1629	272.5	739.3	56.28	846.2	433.3	640.1	366.7	337.2	362.8	489.6	72.4	256.1	445.3	358.1	574.4	2847	1976	357.5	1739	229.5	120.3	2353	223.1	672.3	330.9	333.1	180.5	394.3	244.9	262.4	343	431.7	223	44.39	363.4	282.2	568.9	510.1	431.2	109.8	213.7
TG 42:3|TG 8:0_16:1_18:2	734.624	5.105	[M+NH4]+	156.8	768.1	183.2	128.9	535.5	69.78	165.8	75.17	178.5	87.84	265.7	188.1	99.14	100.2	108	92.55	113.9	64.29	125.5	198.3	957.3	379.2	162.2	596.5	218.1	116.8	275.6	168.8	127.4	95.22	65.81	140.6	167.9	143	135.4	133.2	66.47	67.31	310.4	108.5	102.1	96.24	71.97	47.88	153.9	252.5
TG 42:4|TG 8:0_16:2_18:2	732.612	4.67	[M+NH4]+	4833	2622	525.4	107.2	1034	621.6	542.4	2962	2173	600.9	694.9	439.5	939.9	2430	113	84.67	2763	2891	887.2	59.56	2976	652.8	3157	5556	4000	269.7	556.3	1458	379.8	116.5	1790	1229	673.7	588.7	231.8	375.3	325.1	3615	394	235.7	698	565.3	242.3	286.4	5505	4922
TG 43:0|TG 12:0_15:0_16:0	754.688	6.387	[M+NH4]+	93.36	48.22	234.7	44.78	201.4	148.6	141.6	100.7	110.9	476.6	288.5	179.4	104.7	231.3	48.17	176.3	47.75	77.11	52.95	196.9	102.7	366.4	44.97	379.1	45.63	808.1	136.5	186.3	195.5	170.3	149.2	239.6	143	46.18	57.9	219.2	48.99	224.6	93.17	142.4	44.93	83.63	410.5	45.73	419.7	47.57
TG 43:2|TG 9:0_16:0_18:2	750.659	5.709	[M+NH4]+	0	0	0	0	0	0	0	0	0	0	0	0	0	0	0	0	0	0	0	0	0	0	0	0	0	0	0	0	0	0	0	0	0	0	0	0	0	0	0	0	0	0	0	0	0	0
TG 44:0|TG 14:0_14:0_16:0	768.702	6.601	[M+NH4]+	3047	3006	4709	7546	7696	1202	5330	923.1	1277	1528	1488	3079	1768	2605	1106	870.8	769.2	836.3	1367	2959	8983	4283	1427	5815	2068	3006	6250	3384	953.8	784.3	2098	387.1	110.2	0	907.6	1353	377.7	1111	1362	391.2	848.9	571.1	1343	738.2	1610	1988
TG 44:1|TG 10:0_16:0_18:1	766.688	6.264	[M+NH4]+	1297	929	3577	3693	4780	553.4	5024	153.8	471.7	469.6	568.9	1722	571.2	181.5	696.4	83.08	286.5	225.8	293.7	900.1	5526	2346	96.3	6359	404.8	336.7	3810	1606	303.6	46.7	1546	46.53	180.4	177.8	314.4	589.5	272.2	373.8	317.6	90.29	303.2	197.8	334.4	140.8	141.8	345.5
TG 44:2|TG 10:0_16:0_18:2	764.675	5.911	[M+NH4]+	638.5	951	1063	1592	1881	375.6	620.3	428.2	83.97	564.7	385.9	494.3	541.8	82.92	380.3	40.36	75.55	44.02	41.46	491.7	1449	1343	468.5	2935	86.16	170.2	1480	1108	410.8	85.87	650.6	185.9	0	127.3	240.8	345.5	113.2	538.5	215.3	295.2	293.5	161.8	162.7	72.35	126.6	162.8
TG 44:3|TG 10:0_16:1_18:2	762.658	5.548	[M+NH4]+	0	0	0	0	0	0	0	0	0	0	0	0	0	0	0	0	0	0	0	0	0	0	0	0	0	0	0	0	0	0	0	0	0	0	0	0	0	0	0	0	0	0	0	0	0	0
TG 44:4|TG 10:0_16:1_18:3	760.641	5.347	[M+NH4]+	0	0	0	0	0	0	0	0	0	0	0	0	0	0	0	0	0	0	0	0	0	0	0	0	0	0	0	0	0	0	0	0	0	0	0	0	0	0	0	0	0	0	0	0	0	0
TG 44:4|TG 8:0_18:2_18:2	760.645	5.155	[M+NH4]+	0	0	0	0	0	0	0	0	0	0	0	0	0	0	0	0	0	0	0	0	0	0	0	0	0	0	0	0	0	0	0	0	0	0	0	0	0	0	0	0	0	0	0	0	0	0
TG 45:1|TG 14:0_15:0_16:1	780.703	6.445	[M+NH4]+	197.6	381.9	199.6	240.9	241.6	100.9	280.3	174	544.7	242.9	101.6	397.9	151.1	97.93	194	255.4	138.2	86.95	95.7	275.2	344.9	100.9	196.7	739	200.6	293.7	337.3	184.4	135.1	178.8	683.5	95.02	242.5	38.57	285.5	289.2	188.7	235.5	186.5	293.9	285.9	258.3	647.2	232.4	238.6	259.5
TG 45:2|TG 11:0_16:0_18:2	778.69	6.114	[M+NH4]+	0	0	0	0	0	0	0	0	0	0	0	0	0	0	0	0	0	0	0	0	0	0	0	0	0	0	0	0	0	0	0	0	0	0	0	0	0	0	0	0	0	0	0	0	0	0
TG 45:4|TG 9:0_18:2_18:2	774.663	5.543	[M+NH4]+	0	0	0	0	0	0	0	0	0	0	0	0	0	0	0	0	0	0	0	0	0	0	0	0	0	0	0	0	0	0	0	0	0	0	0	0	0	0	0	0	0	0	0	0	0	0
TG 46:0|TG 14:0_16:0_16:0	796.734	6.949	[M+NH4]+	28490	23100	39530	44130	52450	16280	38610	15750	11530	20200	15920	24480	15360	16840	13550	10340	10700	11820	10020	29680	76350	41330	22210	40610	16280	18450	48300	24520	14690	14570	24750	10190	7499	10890	13840	10080	10270	11430	12250	8739	9425	6052	13630	17440	14000	22330
TG 46:1|TG 14:0_16:0_16:1	794.719	6.641	[M+NH4]+	19400	15490	36220	35010	45500	8536	39990	7622	5727	10680	9869	18290	10340	8438	6287	3838	4146	6147	6555	13920	42790	25250	8244	34300	8934	7202	47170	18710	7004	4787	13990	1494	2057	2636	6195	3676	1992	4737	3005	1185	3013	2465	4114	4477	1788	6070
TG 46:2|TG 12:0_16:0_18:2	792.704	6.306	[M+NH4]+	9417	5679	13440	17260	22550	3257	13560	1715	2189	5014	2144	7818	2958	3617	1775	610.4	2078	1620	1347	3535	17480	8360	1588	69320	3551	1017	14630	10330	2485	556.5	7014	364.5	261.8	266.5	846.5	1909	713.6	880.5	184.8	0	1009	332.2	759.7	1010	172.4	932.9
TG 46:3|TG 12:0_16:1_18:2	790.688	5.97	[M+NH4]+	1053	462.8	984.5	2959	3266	175.9	1130	44.06	190.9	75.45	127.8	551.6	214.5	262.5	130.5	41.66	41.4	44.01	191.9	504.1	1449	226.4	253.4	3743	299.2	167.2	958.2	519.8	172.3	44.02	1236	115.1	0	43.99	0	39.37	0	44.61	43.07	85.46	117.6	80.88	42.6	0	42.06	127.6
TG 46:5|TG 14:1_14:1_18:3	791.609	5.374	[M+Na]+	0	0	0	0	0	0	0	0	0	0	0	0	0	0	0	0	0	0	0	0	0	0	0	0	0	0	0	0	0	0	0	0	0	0	0	0	0	0	0	0	0	0	0	0	0	0
TG 46:6|TG 8:0_16:0_22:6	784.641	5.185	[M+NH4]+	1756	114.9	1003	8680	808.7	3375	478.8	67.95	433.8	937.8	484	763.5	0	1175	423.4	728.7	741.6	470.6	940.9	840.7	988.7	0	498.1	1588	648.8	422.4	509.1	807.4	578.7	479.5	742.4	2690	490.5	403.2	115.9	88.1	633.3	513.7	401.9	604.6	534.9	356.9	629.5	374.9	372.1	806
TG 47:0|TG 15:0_16:0_16:0	810.747	7.147	[M+NH4]+	2824	1592	3109	2064	3314	1653	2218	2593	1348	2628	1143	2311	2872	579.4	1684	347.9	1159	1059	1305	2022	4329	2246	927.9	3017	842.2	4204	2774	1449	1920	1252	3036	881.2	769.2	557.9	1712	1716	1440	1517	1036	831.4	1468	1013	1820	1435	1630	2712
TG 47:1|TG 15:0_16:0_16:1	808.73	6.836	[M+NH4]+	989	1172	1626	1774	2689	679.7	1914	108	577.7	948.4	564.5	1198	259.7	104.1	860.8	210.9	107.6	636.5	383	884.7	2209	589	630.5	1105	420.5	946.3	1355	1309	818.7	259.5	330.7	109.3	104.7	200	422.6	258.2	397	410.9	212.8	0	0	315.2	570.6	200.2	269	552.7
TG 47:2|TG 13:0_16:0_18:2	806.717	6.493	[M+NH4]+	244.3	498.3	329	440.4	1023	50.16	141.6	353.1	53.81	145.9	103.5	267	49.7	46.19	239.9	190.9	50.84	60.19	150.8	363.5	897	263	49.14	1781	173.4	95.49	294.8	238.3	149.3	45.49	138.1	51.65	94.04	82.4	341.3	181.2	147.2	0	132	0	45.46	47.22	50.45	205.1	0	149.1
TG 47:4|TG 11:0_18:2_18:2	802.692	5.984	[M+NH4]+	0	0	0	137.2	0	0	0	0	0	0	0	0	0	109.6	0	0	0	0	0	0	104.3	0	0	86.18	0	0	0	0	0	0	156	0	0	0	0	0	0	0	0	0	0	0	0	0	0	0
TG 48:0|TG 16:0_16:0_16:0	824.767	7.285	[M+NH4]+	144800	147700	172800	204300	236200	91680	188000	95160	69430	114100	100800	137200	104000	96100	103200	60600	63170	78870	66890	185600	465600	232800	150100	258100	100700	96630	201500	160100	106100	116100	140300	98230	80040	92600	89060	84660	70420	83920	100100	62720	86120	56240	84540	151500	141600	195000
TG 48:1|TG 14:0_16:0_18:1	822.751	6.994	[M+NH4]+	134700	121500	235600	240900	293200	71280	242800	50710	40100	78820	70450	109800	65430	65130	57150	32970	39800	40150	39190	120600	370800	208400	81860	209500	73510	47000	301200	129200	54210	48640	98990	31060	29300	27470	50360	34360	27210	35550	36360	19590	34640	24150	44440	57730	42150	76580
TG 48:2|TG 14:0_16:0_18:2	820.735	6.682	[M+NH4]+	83390	66950	137700	165500	189600	38220	134300	25100	22790	44670	32000	68090	32540	38960	24170	16750	24180	18960	22000	61750	211400	98490	33690	123300	41790	21200	157300	85040	34670	18630	64890	9128	8763	10160	21040	16920	12680	19670	11120	4599	18890	11550	18300	21370	13180	20250
TG 48:3|TG 14:0_16:1_18:2	818.718	6.36	[M+NH4]+	21450	12980	25690	34700	38250	7199	26170	4413	5761	10360	5091	14240	6662	8010	3901	2040	4894	2833	4723	7640	36710	14890	3945	31370	9170	3111	27850	20970	6455	1775	19520	520.7	1969	331	3306	2484	1228	1727	1188	384.6	2366	960.4	2281	1142	1130	2404
TG 48:5|TG 12:0_18:2_18:3	814.688	5.79	[M+NH4]+	142.4	148.8	9582	22240	31.33	2388	11180	10370	231	251	11010	158.9	113	12820	120	72.68	12190	56.37	10270	12560	83.8	13880	181	19790	14100	10140	148.5	16350	53.1	13730	144	25350	14590	14550	13800	14880	11290	191.2	12990	15290	16040	10650	12490	17540	95.48	20020
TG 49:0|TG 16:0_16:0_17:0	838.773	7.472	[M+NH4]+	2409	2183	4003	2769	2233	1807	2672	1458	1933	2147	918.1	2838	1762	648.7	2655	1697	1367	2011	1174	2279	5787	3156	2866	4816	939.9	2915	1860	2503	2132	1077	3846	2144	1749	1371	1769	1978	695.5	2024	4060	672.3	1046	453.8	2304	3450	2462	4680
TG 49:1|TG 15:0_16:0_18:1	836.771	7.182	[M+NH4]+	4006	8179	7652	10600	14900	3072	8109	2543	1162	3538	2142	3905	5090	3264	3173	2054	1917	1468	1594	6733	16940	8601	3886	10810	2333	2102	6385	6505	2735	2410	6216	476.1	1451	1949	1814	1927	1818	1328	2573	981.5	2231	1570	2500	3978	1960	4299
TG 49:2|TG 15:0_16:0_18:2	834.753	6.886	[M+NH4]+	3595	4578	6053	9789	9153	1710	6918	767.7	743.6	2123	886.7	3283	2627	1198	1661	741.9	1431	1199	1127	5765	13380	3775	2212	9426	1516	575.6	4338	6478	1727	1056	4958	257	203	101.4	1070	563.9	336.5	531.4	372.6	236.9	388.4	211.7	470	1592	360.1	740.9
TG 49:3|TG 15:0_16:1_18:2	832.737	6.568	[M+NH4]+	410.4	651.1	597.5	1692	2270	345.2	902.3	48.49	50.26	267.7	0	49.74	102.2	300	51.29	0	50.14	54.31	47.73	337.6	2055	247.1	49.94	624.7	485.7	48.13	446.7	514.8	217.6	157.6	1332	48.53	0	49.07	0	99.21	52.55	49.03	0	0	132.4	0	145	145	52.94	144.6
TG 49:4|TG 13:0_18:2_18:2	830.72	6.24	[M+NH4]+	0	0	98.08	325.1	0	0	0	174.5	153.1	0	0	0	0	0	0	0	0	98.01	0	205.6	912.7	176.2	0	165	0	0	283.3	0	0	0	96.1	0	124.9	144.9	0	0	0	144.9	0	0	0	0	0	144.8	0	0
TG 50:0|TG 16:0_16:0_18:0	852.796	7.609	[M+NH4]+	105500	124600	135300	156400	157900	78920	121800	96240	74450	106600	105500	116300	104500	92320	108100	71390	63420	89650	73820	148600	280800	155000	131700	196700	96920	95980	139700	133400	111900	108600	122000	112800	90630	105000	96900	96200	86390	83410	111800	73960	108600	65670	77840	185600	171500	211000
TG 50:1|TG 16:0_16:0_18:1	850.782	7.325	[M+NH4]+	502800	624100	909000	973800	1104000	356800	695100	310000	219600	444800	361000	483500	406100	362800	405900	211900	249100	267700	255600	667700	1752000	894200	492200	970600	376700	271700	938800	601800	354600	364600	471700	271900	212500	235500	286100	260700	207800	249800	324300	153600	307400	188800	281000	471700	369500	575600
TG 50:2|TG 16:0_16:1_18:1	848.766	7.035	[M+NH4]+	389800	577800	852400	981300	1169000	247000	622400	164700	104500	295700	190100	336500	240800	256700	222900	108700	172700	150700	148900	546600	1813000	745200	276600	938000	273500	99020	820400	567100	237400	147600	485100	80820	79850	65470	122100	131200	102400	116100	113400	50760	185500	99600	140700	177000	120300	187900
TG 50:3|TG 16:0_16:1_18:2	846.752	6.73	[M+NH4]+	164500	175100	289400	403000	469900	84450	231500	56420	43700	112100	64870	120700	78880	103800	63740	34260	64170	49090	58360	138500	515000	183100	63820	344400	112800	30680	268000	231000	88900	47680	239500	18220	25850	15830	39310	40440	37830	41850	34260	13460	55800	30290	44590	47390	28990	40260
TG 50:4|TG 16:1_16:1_18:2	844.732	6.41	[M+NH4]+	35250	37810	47410	69300	82500	14310	39730	10140	8654	20810	11980	21350	14200	20370	11570	8230	13530	9689	11050	24900	83060	28530	9746	71260	20650	6400	31590	43360	14960	7433	52090	1936	2628	1478	6918	8639	6610	8622	8389	1303	9108	5115	7621	7730	4429	8091
TG 50:7|TG 12:0_16:1_22:6	843.647	5.647	[M+Na]+	222.2	80.37	145	132.9	237.3	270.9	162.9	386.8	201.7	0	316	115.2	282.6	131.7	155.5	82.91	184.5	236.9	318.5	131.3	313.3	158.9	90.94	201.8	180	127.7	255.7	203	78.6	128.8	432.1	99.32	0	128.1	149.8	119	113.6	164.2	117.2	99.37	118.1	242.9	147.4	134.9	180.6	116.2
TG 51:0|TG 16:0_17:0_18:0	866.812	7.778	[M+NH4]+	1807	1728	1669	2945	1956	558.9	2572	1339	1694	1432	386.6	2626	1669	1216	1949	1274	697.2	999.8	1789	3283	3568	1915	2323	4661	1214	1195	1950	1800	860.1	2941	2685	1430	1147	1095	799.7	1434	1058	1373	1162	1651	1312	743.5	1046	2238	2176	2259
TG 51:1|TG 16:0_17:0_18:1	864.795	7.494	[M+NH4]+	8231	12560	15070	15510	16090	6654	12950	6166	3335	8945	7076	10120	6537	6819	9616	4119	5683	5706	5235	13520	25860	12290	9580	17010	7039	5761	12610	11540	6594	6593	10680	5210	4597	4988	4263	4414	4900	4745	6886	2978	6853	3692	5667	6961	6712	10220
TG 51:2|TG 16:0_17:1_18:1	862.78	7.221	[M+NH4]+	10670	16050	19660	24770	27070	8857	14190	4387	2622	9845	3924	9106	9143	7075	8609	3285	4634	5455	5310	18880	39240	17100	6417	24600	9073	3062	14250	16240	7246	4529	15760	1924	3018	2307	1940	3550	3701	2474	3335	1594	6569	3128	4626	6662	2926	6670
TG 51:3|TG 15:0_18:1_18:2	860.766	6.926	[M+NH4]+	6227	11110	12940	18150	21070	3822	6811	2201	1612	5909	1996	4035	3605	5174	4108	1936	2387	1669	3508	7571	25590	7636	1560	22220	5488	451.3	5628	12430	3461	1644	14330	613.7	896.9	403.9	419	2002	2010	1716	1248	477.3	4229	1691	1900	3061	777.5	1548
TG 51:4|TG 15:0_18:2_18:2	858.748	6.619	[M+NH4]+	714	3613	2614	2677	5792	596.3	588.2	153.7	152.7	600.9	235.8	1127	248.6	1047	246.2	30.1	362.4	314.7	343.8	1822	5531	647.1	433.4	5413	713.1	48.98	353.6	1900	452.2	203.5	3688	127.1	99.77	47.8	107.1	299.8	48.02	54.24	48.01	0	552.5	100.7	413.8	276.5	45.1	308.7
TG 51:5|TG 15:0_18:2_18:3	856.732	6.305	[M+NH4]+	109.5	90.62	99.19	3674	141.8	443.1	1578	322.2	243.3	798.5	103.6	376.8	733.5	1247	95.2	150.5	808.3	571.3	90.26	2547	7557	1045	668.8	3697	697.8	354.5	98.44	221.2	406.4	153.6	96.01	0	151.9	0	0	328	429.3	80.85	103.2	172.5	70.54	82.09	442	0	0	79.98
TG 52:0|TG 16:0_18:0_18:0	880.826	7.913	[M+NH4]+	54120	52950	60660	71080	70260	41960	49300	51890	38030	58950	56220	56260	56660	50820	50580	38040	34620	47130	41650	65540	95240	63790	64430	82000	45510	47410	52790	60700	54470	49990	46960	52960	49800	53030	44880	50830	45480	45020	53890	37400	52910	34080	41060	88840	89070	88520
TG 52:1|TG 16:0_18:0_18:1	878.813	7.645	[M+NH4]+	322000	374000	479200	531700	528900	247000	329500	240400	176400	320100	288000	318600	292800	262600	308400	183700	182900	223700	204900	421800	875200	481300	334100	517800	240900	221100	452100	346200	281100	287800	284400	249500	206400	216700	238200	220500	184600	212800	279700	154700	272500	159400	217100	402700	330800	477300
TG 52:2|TG 16:0_18:1_18:1	876.798	7.368	[M+NH4]+	597100	862900	1325000	1445000	1609000	505300	730600	380600	252200	640900	415200	569400	553600	519800	594600	287700	351000	348800	363200	854000	2459000	1036000	509800	1273000	488900	232400	1170000	841600	458500	381500	833100	255400	233200	218200	313300	299200	242300	286400	375100	163100	443500	251200	382000	494700	370500	589100
TG 52:3|TG 16:0_18:1_18:2	874.783	7.082	[M+NH4]+	527800	1012000	1296000	1661000	1884000	429100	667700	301100	170200	580600	279000	477300	452100	537600	491100	215500	350900	314000	341600	862600	2745000	900900	346900	1657000	535400	125000	871800	980700	459200	261100	1313000	105100	141800	88440	176100	225900	235700	210900	249900	87730	440400	220900	260200	302200	200100	266900
TG 52:4|TG 16:0_18:2_18:2	872.765	6.776	[M+NH4]+	245800	515000	545300	781900	913300	154900	265900	120800	77250	234500	115500	193600	157600	258000	178500	94540	155500	124700	160600	401600	1300000	343900	142800	896400	235300	47530	272400	460000	192500	96300	796300	38220	55860	32320	71860	97280	125300	86630	104600	31310	164200	85710	96200	120900	79530	100200
TG 52:5|TG 16:1_18:2_18:2	870.749	6.469	[M+NH4]+	45730	79640	78520	125600	138200	24730	42410	30740	24280	43860	19680	34810	31290	48000	27580	19000	29710	24010	25760	52050	176700	51050	23340	179300	41180	8181	33700	76600	34470	19280	155200	8261	9621	7205	11500	20790	25670	24130	27140	3435	27300	13060	18190	24090	19720	26330
TG 52:6|TG 16:1_18:2_18:3	868.733	6.239	[M+NH4]+	11710	10890	11460	16080	10980	6004	14350	7676	6167	7798	8800	8289	7221	8156	8735	4319	5365	5598	6316	9764	16040	9745	8706	395400	8026	5903	9448	9873	7536	8365	18250	6069	6136	6005	6581	6800	5551	5888	9944	4432	7491	4214	8072	8771	5511	14780
TG 52:7|TG 18:2_18:2_16:3	866.721	6.015	[M+NH4]+	0	0	0	0	0	0	0	0	0	0	0	0	0	0	0	0	0	0	0	0	0	0	0	0	0	0	0	0	0	0	0	0	0	0	0	0	0	0	0	0	0	0	0	0	0	0
TG 53:1|TG 16:0_19:0_18:1	892.826	7.806	[M+NH4]+	4796	5964	8376	8878	7510	2776	5695	3323	2788	6983	3939	1928	5836	4035	3964	2249	3077	3436	4194	6598	11170	7573	6077	9661	3489	2272	6176	5505	4300	3302	4410	3228	2008	2543	3478	2442	2584	2204	4378	2258	4049	1744	3844	5290	5015	6245
TG 53:2|TG 16:0_18:1_19:1	890.813	7.531	[M+NH4]+	8594	15630	18490	20740	19900	8296	9989	5938	5250	9590	5853	8708	9806	7959	11910	4999	4772	6047	4888	18840	32230	16200	9109	19900	8129	2741	10170	12550	9151	5810	12660	3079	3060	3219	3378	4174	3524	3785	4364	1628	7112	3563	5347	9647	5218	9783
TG 53:3|TG 17:0_18:1_18:2	888.796	7.262	[M+NH4]+	6903	17050	19160	22830	28570	7845	9900	4547	1474	8795	2629	6088	7163	5895	10560	2465	4609	3873	7092	12440	37370	13260	4073	25940	7068	975.9	11860	15450	6473	3860	14850	787.3	1110	1180	1323	2807	1628	2474	3170	804	8349	2553	3433	2791	2408	2796
TG 53:4|TG 17:1_18:1_18:2	886.78	6.97	[M+NH4]+	4537	10240	11690	14950	17330	3091	3965	1513	641	4304	1148	2961	2357	2308	4193	1403	3519	1421	1796	7385	23020	4493	2136	18200	3932	89.57	3227	9133	3605	1548	10180	363.4	213.9	155.8	975.6	534.9	1161	793.4	509.1	55.14	2917	438.9	1116	2216	894.9	1440
TG 53:5|TG 17:1_18:2_18:2	884.767	6.666	[M+NH4]+	148.1	2381	2368	3904	4522	378.9	727.5	383.6	214.9	986.9	361	452.7	148.6	533.2	1788	0	238.6	294.4	213.8	1157	5476	909.1	93.93	6560	650.3	226.4	238.9	1320	922.1	0	3637	256.6	295.8	135.6	108.6	95.89	609.7	115.8	0	170.3	473.9	188.8	134.3	180	0	295.3
TG 53:6|TG 17:1_18:2_18:3	882.751	6.364	[M+NH4]+	2011	867.9	694.1	984.9	1562	745.1	601.3	2053	1056	2249	1416	2052	990.2	1211	1756	698.9	689.2	655	533.6	1785	2621	814.3	1363	6870	1942	1664	2443	2913	2399	1830	2805	2345	1813	2616	2313	1419	2964	2515	3421	2534	2477	1661	2368	2469	3186	4315
TG 53:7|TG 15:0_18:2_20:5	880.732	6.272	[M+NH4]+	36210	32720	31540	38110	40340	21690	27880	36470	40210	43040	42070	39620	33580	36250	38000	26680	25960	29360	23420	31460	49830	25350	36350	65370	42550	42330	55120	56460	55520	40300	54190	51940	48240	61270	54220	48880	44390	61030	72860	44980	55590	34900	55780	71480	78480	77740
TG 54:0|TG 16:0_18:0_20:0	908.853	8.206	[M+NH4]+	13540	12490	14360	16480	15370	10140	10290	12530	9368	15060	14710	12810	11740	10910	12610	10550	7932	15010	11310	14040	17640	15350	14580	16540	9842	6713	7224	9699	9163	7912	9363	9620	8174	9452	5730	8733	9113	7804	10380	5715	10790	5525	8267	13440	10450	9458
TG 54:1|TG 16:0_18:0_20:1	906.846	7.942	[M+NH4]+	116800	107700	137800	152100	146700	91550	94090	91650	67730	114300	102600	105900	104000	91520	96110	74390	66840	92500	77360	137000	203700	137700	115800	142200	75330	74400	100500	99330	85470	90000	75360	84010	66420	77080	76100	69330	68750	76790	95530	52580	83810	57750	75330	123500	99950	135400
TG 54:10|TG 18:2_16:3_20:5	888.702	5.562	[M+NH4]+	6024	5482	6687	6437	7242	4531	6270	5173	4493	7927	7775	7787	6584	5970	7952	5743	4310	8891	7601	6439	8029	8269	8269	11290	0	3502	6482	5641	7272	7362	7517	6955	6657	6621	5926	6988	4617	8087	8675	4689	6886	5255	7357	7990	5858	7785
TG 54:2|TG 18:0_18:1_18:1	904.827	7.68	[M+NH4]+	200300	276400	413100	399400	416000	193400	220400	157700	115000	233900	196300	195200	211600	184000	231000	128600	139600	152800	150000	284000	673900	338500	199100	312800	153800	115400	287400	235200	163900	169400	183800	134700	107000	108500	139800	110300	95940	121300	163700	76260	167700	102000	148400	211600	154900	237900
TG 54:3|TG 18:0_18:1_18:2	902.813	7.415	[M+NH4]+	271100	487100	831400	832100	995100	288800	310000	188700	107600	368500	183000	264600	299800	240700	383300	144700	214900	198000	213800	443700	1504000	509000	216100	646500	272600	88380	524500	478000	244000	171200	323300	94830	92650	80230	129900	121200	96040	123000	144600	69680	270800	141500	180800	192200	142000	222600
TG 54:5|TG 18:1_18:2_18:2	898.78	6.848	[M+NH4]+	245900	500600	505200	630000	777600	189700	238100	130900	67980	292400	107100	164700	168400	168300	253300	126600	175600	135100	184300	383900	1148000	290600	130200	786500	251300	54600	164700	406500	207300	120700	445900	56690	61630	52630	72760	86970	81320	86160	98220	46770	211700	112700	125000	129700	93260	118700
TG 54:6|TG 18:1_18:2_18:3	896.765	6.515	[M+NH4]+	212500	294800	240200	355200	368200	148500	220500	163800	121300	200000	170300	221100	184200	180700	219700	122500	128600	149200	156100	267200	492200	213500	214800	506400	196800	151000	223200	249800	222800	214200	387200	183200	145800	159300	177700	170900	130600	157100	241100	103800	209000	131100	196200	281700	191800	346100
TG 55:1|TG 16:0_21:0_18:1	920.861	8.098	[M+NH4]+	3342	4684	6070	6251	3505	2284	3649	2339	2021	3429	3783	3334	3367	3188	3156	2257	2401	2211	1920	3567	6084	3308	3171	5607	2832	2588	2396	3721	2713	1112	2556	2189	1452	2194	2296	2083	3219	1632	3405	887	4101	1771	1818	3160	2609	2464
TG 55:2|TG 19:0_18:1_18:1	918.844	7.839	[M+NH4]+	3234	4655	5985	8770	8417	2650	3661	2014	2104	5180	3253	4226	4117	3553	3362	2796	2869	1835	2190	9546	12330	5610	3720	6567	1986	935.6	3343	4841	3026	2738	2548	1959	1315	1283	2017	1756	1279	1928	2932	759.2	3365	814.9	2106	6094	1718	3991
TG 55:3|TG 18:1_18:1_19:1	916.827	7.577	[M+NH4]+	3157	7513	9050	7644	10790	2882	2450	1893	960.7	3645	993.6	2883	2727	2070	5601	1213	1527	1595	2113	5979	15670	5764	1440	10650	3197	897.7	3479	5811	2131	2256	3655	744.1	489.6	314	450.6	802.6	279.6	683.7	592.8	436.8	2999	1177	1694	1986	2007	2646
TG 55:4|TG 18:1_19:1_18:2	914.809	7.306	[M+NH4]+	975.1	5811	6868	7352	9000	1275	1254	1401	124.9	2180	1571	1320	1033	609.6	2842	893.4	1091	1150	2253	3003	11480	2551	1289	7183	2335	112.3	1764	6226	1545	586.5	3508	278.6	51.56	231.6	300.5	343.2	224.3	794.2	681.6	177	2157	589.4	212.8	737.5	568.5	619.7
TG 55:5|TG 19:1_18:2_18:2	912.801	7.011	[M+NH4]+	340	2555	2049	1570	3411	220.4	325.1	277	515.3	889.8	463.3	692.5	456	481.5	1013	418.9	232.6	756.8	481.8	1041	4870	817.5	213.8	2470	542.9	171.1	699.6	1124	825.9	183.9	506	389.8	161.2	248.9	213.4	219.9	109	298.6	313.6	177	831.1	51.73	149.8	837.7	371.2	807.4
TG 55:8|TG 15:0_18:2_22:6	906.75	6.343	[M+NH4]+	357.8	171.8	236	721.7	191.3	169.6	185.3	101.5	146.2	492.8	92.52	773.1	415.2	346	250.8	131.1	295.3	75.28	122.7	525.1	108.1	132.9	211.9	188.7	744.5	85.06	171.2	248.6	318.5	96.98	436.8	521.7	143.1	147.1	90.21	264.9	394	152.5	745.5	268.3	178.8	320.9	357.1	89.97	770.6	921.6
TG 56:1|TG 16:0_22:0_18:1	934.876	8.228	[M+NH4]+	36800	33360	35990	46390	40590	28950	28440	27460	19950	36750	37350	32290	32130	32060	30380	26900	22780	30620	29490	37150	42050	39600	37180	39170	21280	17740	22270	26660	23520	25900	20470	22560	20260	18550	21030	18070	19870	21040	28910	14760	23340	18500	20240	31090	24240	26090
TG 56:10|TG 18:2_18:3_20:5	916.735	5.888	[M+NH4]+	236.7	273.1	285.9	219.4	412.2	130.5	241.6	0	0	177.6	216.6	299.8	132.9	343.7	84.16	67.74	129.9	124.1	187.1	388.9	88.42	0	333.6	451.2	391.2	227.2	0	87.58	367.1	0	763.5	333.1	158.5	100.8	134.8	172.4	254.6	92.17	333.2	139.9	0	177.5	183.5	0	0	142.5
TG 56:2|TG 18:0_18:1_20:1	932.859	7.969	[M+NH4]+	50620	55190	66830	84680	69760	52910	49110	42910	34760	57570	50860	49660	50420	46950	51740	38510	35310	42390	40730	61760	82160	68300	48960	63720	33680	28920	41650	45320	37280	44380	35630	34840	27470	28650	33570	27230	25460	32440	44790	22010	37530	26880	33680	44110	35550	47310
TG 56:3|TG 18:1_18:1_20:1	930.843	7.708	[M+NH4]+	35400	49800	68090	75770	63760	37100	42760	33280	20850	42960	35880	37880	38220	33190	42070	29300	27570	33120	37500	47970	98110	57180	33790	61470	29550	18770	38660	45580	33750	29410	34480	25420	19160	18490	26710	19960	18570	28340	32070	15000	33380	18210	35550	38390	31180	54890
TG 56:4|TG 18:1_20:1_18:2	928.827	7.47	[M+NH4]+	47660	71930	76030	91880	97550	40040	48270	39000	29170	59070	40570	55850	50250	42720	64830	29990	34310	38790	41910	70080	139600	63910	50210	117200	48890	30720	68070	77080	50120	51990	59950	41920	37000	34840	52540	40560	28180	37480	59500	27480	53780	33760	67020	74620	64950	117700
TG 56:5|TG 18:1_18:2_20:2	926.813	7.242	[M+NH4]+	79950	104100	101300	130700	140600	73050	84370	76700	60020	99060	71120	94580	81120	74910	105200	57750	52970	72810	69090	105400	181100	88280	90820	190600	81480	66940	110200	114000	100600	95250	128500	88240	70990	76410	103700	79010	60690	84870	114300	60070	96520	60790	116200	143400	119800	206600
TG 56:6|TG 16:0_18:1_22:5	924.794	6.974	[M+NH4]+	202100	217500	198000	283200	286400	156300	205200	179900	140300	214600	191200	223800	190000	173500	222700	142800	125200	168500	169600	234400	323900	206300	223800	412600	188200	191500	275200	238200	257900	268600	319500	240000	187200	201000	231000	199500	156900	206600	315200	157700	239100	159800	241800	363800	261500	469400
TG 56:8|TG 16:0_18:2_22:6	920.764	6.536	[M+NH4]+	20360	25780	21030	50100	43820	17980	31260	21720	17360	27100	19590	31210	26290	34270	32660	19100	21780	29660	28480	26490	50470	21580	17730	45830	18720	10280	22910	32450	22440	22710	115700	20260	21180	18850	22080	27740	23570	25000	36710	15830	31510	24890	39000	29020	18070	36240
TG 56:9|TG 16:1_18:2_22:6	918.752	6.208	[M+NH4]+	857.1	318.7	586.4	3620	2671	313.4	1598	801.7	769.7	1302	377.6	1981	522.3	2767	1045	255.7	474.2	1241	1679	896.2	3338	967.5	507.8	3287	268	0	568.7	1349	1278	969.9	15150	419.5	188.5	163.3	633.5	363.9	1378	592.9	962.6	182.2	1246	422.8	1673	781.7	166.5	1126
TG 57:1|TG 16:0_23:0_18:1	948.887	8.387	[M+NH4]+	3341	3955	3925	3035	3302	1862	1566	2309	1677	2667	2786	3340	2710	2267	1664	1404	1280	2289	2384	2804	4770	3963	2520	3703	2220	2437	1654	2080	1995	2297	1549	1435	2132	2308	2933	1291	2551	2201	2531	1588	2550	1214	604.6	2950	1017	2022
TG 57:2|TG 16:0_23:0_18:2	946.875	8.138	[M+NH4]+	3173	2950	4735	4595	5384	2012	3241	2964	1894	4958	2826	4306	4345	2774	2340	3487	2058	2616	2880	3719	5184	3854	2921	4823	1752	2386	4213	2496	2497	3133	3737	1865	3036	1516	2525	3786	1797	1549	2783	1158	3120	3042	2506	4675	1403	2835
TG 57:3|TG 21:0_18:1_18:2	944.86	7.882	[M+NH4]+	3383	2799	4000	4629	3943	1843	1410	2746	1886	3894	508.3	2332	2609	2206	3752	3265	2672	3798	1606	3281	4154	3994	3647	2533	1075	1149	4405	2198	961.6	823	2391	1407	1961	611.3	1585	1022	2588	792	1852	410.1	3393	1124	2634	1437	497.1	2101
TG 57:4|TG 18:1_21:1_18:2	942.842	7.618	[M+NH4]+	318.6	468.5	1407	587.4	390.3	265.7	535	1493	50.47	1093	182.5	532.1	52.75	1267	54.5	221.8	280.3	306.8	271.6	847.7	1130	246	144.3	1217	339.9	58.32	644	348.4	794.9	361.6	286.5	488.1	713.3	288.1	800	321.4	566.4	486.2	58.85	293.4	390.8	53.51	323.3	993.9	530.5	535.8
TG 58:1|TG 16:0_24:0_18:1	962.912	8.508	[M+NH4]+	19090	14890	17390	19240	18300	13820	10890	13310	8945	18440	17940	15270	14940	14060	11870	14080	8756	13840	11290	19960	20760	19910	15810	19570	11850	7593	11620	10790	9980	12490	9542	9900	8547	10820	8776	8667	9393	10720	14640	6245	10730	9416	9790	14000	11230	14960
TG 58:1|TG 16:0_24:0_18:1	967.858	8.51	[M+Na]+	21540	18180	21540	23930	22120	17270	14880	14640	12090	22120	20150	16710	18480	18110	18500	15080	11390	16810	15840	24190	23190	24640	20480	20440	13490	10010	12430	13940	13940	15450	10130	12620	8149	11750	11240	11680	11650	12110	14570	8236	15190	8539	10880	17690	12020	16440
TG 58:10|TG 18:2_18:2_22:6-1	944.766	6.263	[M+NH4]+	16410	17970	13610	20550	23920	11850	18680	17800	15390	16240	15730	18420	16300	17940	20160	11090	10950	15120	15210	18420	23920	13260	18740	34340	15260	13680	24730	18630	21720	20830	35330	17060	106.9	17210	19110	20350	12200	22560	28370	13390	19170	14070	31170	28360	22080	39090
TG 58:10|TG 18:2_18:2_22:6-2	949.723	6.264	[M+Na]+	18430	17280	17720	19840	26900	13520	21330	25720	22260	18410	16720	21430	16460	17280	18980	13060	11590	16180	16430	21360	30030	13870	20680	22680	17260	16810	25680	18240	20000	21320	38330	18330	18260	16290	19710	18240	12690	20300	28850	15220	18280	15020	27630	26710	21070	37310
TG 58:12|TG 18:2_18:4_22:6	940.74	5.685	[M+NH4]+	1443	2333	1170	1868	2913	860.4	1254	1302	602	1893	977.8	1473	1253	1278	1812	444.6	865	1430	893.7	1426	677.3	1131	941.3	3436	892.9	1008	2098	1223	1642	2006	2977	1363	1327	1794	862	1177	691.7	1640	1852	895.7	872.8	913.6	1784	3004	771.3	3811
TG 58:2|TG 16:0_18:1_24:1	960.89	8.254	[M+NH4]+	29650	25640	30010	36660	33020	24560	21940	22220	16760	28200	27070	24340	23810	23780	23390	20240	15200	21260	22020	27430	31970	30790	24380	29310	14500	14040	15710	16650	18420	22980	16710	16680	12830	14820	15980	15580	13060	17170	18100	9428	18160	9700	17280	21360	15800	19730
TG 58:2|TG 22:0_18:1_18:1	965.846	8.257	[M+Na]+	32960	31990	43090	46410	39290	31830	26160	24140	22980	37320	33600	31470	32470	27660	26070	28000	22600	27940	26820	36930	39220	40780	31910	33800	23500	15380	21260	23530	25590	28200	17390	22460	19930	19070	21990	16350	17370	19450	26880	13670	21260	12720	20630	25310	18090	25530
TG 58:3|TG 18:1_18:1_22:1	963.832	8.002	[M+Na]+	18370	19440	27660	31480	30710	20190	19170	15430	11760	21720	18630	17990	18470	17110	19320	16250	12670	14820	15390	21020	29810	24590	16570	23410	14220	9481	14510	15340	15030	16430	14990	14190	10140	10860	14050	8884	8991	11340	18940	6014	14880	8403	13450	15010	11570	17670
TG 58:3|TG 22:0_18:1_18:2	958.878	8.004	[M+NH4]+	13720	14860	19690	22300	21340	14650	12750	12140	8840	17960	14560	14420	14350	12930	12340	9843	8377	11900	12030	16100	23270	17550	12260	17280	7802	5760	10050	11380	11780	11740	8519	8639	5393	6643	6349	8133	4188	8430	10710	4004	9737	5557	7889	12310	8209	12270
TG 58:4|TG 18:1_22:1_18:2	956.857	7.775	[M+NH4]+	4130	5827	6997	9694	9899	2005	4645	1231	1500	7228	3082	4826	2796	3860	5327	2188	1767	4670	3622	6471	14690	4364	4307	13140	3866	1663	6207	7990	4113	3972	1725	2238	1536	1756	5405	2205	1900	3220	7479	1845	3919	2380	6195	8230	4764	12430
TG 58:5|TG 18:0_18:1_22:4	954.847	7.545	[M+NH4]+	16350	16810	16060	22680	25160	11790	15740	11890	12570	18080	13910	20480	15610	13310	18770	9576	9351	13900	10560	19140	28300	17230	17570	35480	15840	11160	21620	19700	19790	18940	17340	16640	13800	12640	20950	13630	8978	15980	23690	9626	15130	11450	22680	30870	21560	43390
TG 58:6|TG 18:1_18:1_22:4	952.826	7.29	[M+NH4]+	27020	29300	26930	37590	37850	22420	28780	26320	18680	31770	23400	31520	28390	20840	31160	18720	16830	26000	22220	34970	40580	30050	31370	55070	24180	21850	33020	32210	27040	32350	36420	30580	20510	22290	28880	22690	19720	26980	41720	16000	29080	21540	38080	45720	34070	57320
TG 58:9|TG 18:1_18:2_22:6	946.78	6.605	[M+NH4]+	11430	14070	14050	22160	22830	8343	14790	11500	8349	15260	10780	15690	14330	15260	16490	7896	10000	13260	17320	12670	22840	9749	10270	23790	9909	6383	11930	17820	13490	12240	39750	8883	10740	8997	10150	11360	8597	11660	17010	7987	14570	9859	20470	17120	11840	24530
TG 59:1|TG 16:0_25:0_18:1	976.925	8.645	[M+NH4]+	266.7	348.1	1024	1083	859.9	597.1	410.3	703.3	130.2	541	37.46	342.9	507.9	1108	82.99	711	145.4	73.04	615.4	1217	1539	303.7	411	1052	240	277.9	46.17	473	1037	555.4	474.4	547.4	532.1	744	457.2	527.2	394.5	85.2	670	246.6	266.8	91.9	271.2	460.3	310.3	148.8
TG 59:11|TG 16:0_21:5_22:6	956.769	6.279	[M+NH4]+	347.4	335.2	655.1	899.6	739.7	368.3	188.7	380.1	374.8	265.9	677.3	338.2	490.3	212.9	330.5	324.2	210.8	263.9	399.6	728.1	357.9	367.6	417.9	309.7	572.8	329.2	741.7	775.9	430.2	723.8	227.3	237.6	319.3	520.3	220.3	430	0	452.2	342.3	389.3	755.7	153.9	192.1	496.5	518.5	458.5
TG 59:2|TG 23:0_18:1_18:1	974.908	8.415	[M+NH4]+	486.8	2055	2947	1922	3516	1365	2782	1537	1739	2003	2150	1856	1595	242.8	544.5	1589	1015	1203	2191	2479	2114	1888	2762	3184	1579	510.7	2094	1295	1515	3160	1243	2652	1092	1033	1473	193.9	980.1	832.3	1858	1490	1485	543	801.5	1791	604.1	2015
TG 59:3|TG 23:0_18:1_18:2	972.893	8.173	[M+NH4]+	939.1	544.2	865.6	420.2	1674	397.2	399.1	255.9	204.9	299.3	257.2	620.2	357.6	458.5	868.7	463.2	112.7	348.2	390.3	327.2	1351	881.1	452.5	509.9	96.77	492.9	291.8	735	343.8	667.6	647.4	332.1	404.5	183.5	128.4	164.8	54.9	214.1	183.5	182.8	365.3	53.22	180.4	384.2	112.8	405.2
TG 59:4|TG 18:1_23:1_18:2	970.873	7.916	[M+NH4]+	55.33	113.2	103.3	394.9	170.3	55.42	58.58	49.12	56.42	227.6	53.48	46.02	89.92	233.2	241.2	140.9	68.06	54.21	56.05	223.5	597.9	56.69	54.77	164	56.06	40.92	300	57.33	48.62	110.9	38.19	220.9	59.25	40.57	169.3	53.59	134.9	171.7	62	362.7	56.11	59.37	119.7	101.7	120	122
TG 60:1|TG 18:0_24:0_18:1	990.938	8.763	[M+NH4]+	3623	2985	4973	6812	4499	4150	2265	2335	1942	5363	4143	3726	3508	3896	3820	2421	2042	3533	2871	5171	4983	4193	4085	6222	3981	1209	2847	1759	3447	3605	1463	3589	2360	2487	1676	2491	2739	3060	2952	1763	2731	1379	1741	3282	2475	4529
TG 60:12|TG 16:0_22:6_22:6	968.766	6.274	[M+NH4]+	91590	102300	86750	124100	119600	77880	100000	101600	70260	92630	91290	110500	89490	78750	103700	73030	60030	75440	84020	110400	113900	90020	106900	175500	87960	110300	113600	85080	121300	134500	163000	114000	92390	98880	105400	100400	77530	98420	167700	75310	113800	85790	128300	150100	94050	197700
TG 60:13|TG 18:2_20:5_22:6	966.75	5.845	[M+NH4]+	755.9	1503	486.2	1220	1346	602.6	1943	1322	416.8	892.5	990.5	1723	768.6	555.2	2014	595.6	369.3	482.1	410.2	1146	924	916.6	910.7	2925	338.8	577.7	1062	583.5	1024	1673	3815	1542	823.8	1018	1306	1172	585.3	925.3	1755	816	1841	1353	2385	1522	618.2	3818
TG 60:14|TG 18:3_20:5_22:6	964.739	5.572	[M+NH4]+	563.4	424.4	0	545.2	459.4	347.1	822.7	384.5	880	362.1	297.6	0	522.1	287.2	195.7	0	231.3	795.5	388.5	354.6	419.6	780.1	245.1	519.1	271.8	296.2	390.7	516.7	727.1	219.3	376.1	237.6	430.8	311.1	345.3	77.51	126.1	294.1	124.7	0	751.9	233.4	638.1	827.6	730.9	466.4
TG 60:2|TG 24:0_18:1_18:1	988.922	8.537	[M+NH4]+	14380	10890	18540	18270	18740	10350	8259	8821	7493	15490	13840	13720	13280	10730	10160	8155	7945	10780	10190	15020	14790	18480	10750	15160	8550	5425	8550	10050	12000	12520	6503	10590	8092	8465	8426	6853	7486	5688	9582	4979	8678	4016	5834	10700	7123	14000
TG 60:3|TG 24:0_18:1_18:2	986.905	8.299	[M+NH4]+	8297	7273	11930	12440	12300	8786	7453	5869	6362	10510	8347	7221	7850	7183	7188	6805	5170	6038	5779	10820	12510	10180	6736	9269	4692	2574	3773	7481	7545	6348	5966	5210	3956	3401	3842	4135	2388	4018	4937	1798	4875	3084	3460	7532	3256	8003
TG 60:4|TG 18:1_24:1_18:2	984.889	8.05	[M+NH4]+	750.3	757.4	1699	1887	2368	829.2	873.6	644.1	499	1726	605.1	698.6	630.5	1103	1334	447.5	833.9	466.5	746.8	1052	2862	794.9	1046	1412	1065	137.3	676.7	1120	847.8	571.5	172.4	675.2	181.1	59.4	349.1	50.52	297.9	67.58	174.4	57.52	636.9	404.5	838.6	477	435.5	658
TG 60:4|TG 24:0_18:2_18:2	989.845	8.053	[M+Na]+	1119	1779	4688	5679	4093	1004	1888	1330	318.4	1890	1130	1670	1532	1187	1587	252.9	771.6	1428	746	1894	8179	3353	1074	2696	447.8	292.8	1048	2616	2961	317.4	1515	621.1	746.1	702.4	1148	409.4	339.6	1148	409.7	160.3	835	701.1	883.8	1085	94.61	1936
TG 60:5|TG 24:1_18:2_18:2	982.873	7.798	[M+NH4]+	1357	816.4	716.5	662.6	1167	175.2	934.3	586.7	843.4	826.1	290.5	361.3	668.6	184.7	315	386.1	57.36	906.7	280.9	514.3	3449	915.7	1194	2016	408.3	476.5	719.8	1739	537.1	316.1	346.5	651.3	561.1	167.4	470.9	81.34	136.4	253.1	1808	440.5	793.4	263.8	458.8	1220	795.1	1778
TG 60:6|TG 18:1_18:1_24:4	980.857	7.572	[M+NH4]+	1426	1621	3197	3774	3455	1599	1389	1169	789.3	3211	1425	1852	1505	1462	2453	928.2	965.8	2423	271.3	1868	5119	1681	3014	5677	570.6	683.8	2245	1902	1320	1584	1967	2256	949.5	828.2	2016	785.1	695.1	1390	2065	1155	2740	701.2	2328	4261	1992	5494
TG 61:3|TG 25:0_18:1_18:2	1000.92	8.453	[M+NH4]+	322.4	105.9	388.6	211.3	190.8	280.1	107.1	50.59	65.41	207.8	124.3	143.4	49.94	59.5	139.6	61	282.6	45.93	49.89	38.31	403.9	482	52.47	45.11	43.03	44.89	174.9	163.8	102.9	29.61	46.8	130.2	60.44	59.03	54.46	70.24	171.7	67.87	150.1	45.52	285.8	47.13	54.22	94.39	56.58	175.7
TG 61:4|TG 25:0_18:2_18:2	998.905	8.199	[M+NH4]+	0	47.4	57.49	59.08	65.34	64.07	42.72	59.43	49.72	59.81	37.78	160.2	0	58.26	60.09	59.21	50.49	41.81	47.82	0	171	166	42.09	58.24	61.39	60.49	59.5	50.34	0	57.97	31.15	44.07	237.9	79.53	39.58	51.05	57.62	36.44	57.59	51.55	236.6	83.2	43.65	147.6	242.7	59.42
TG 62:13|TG 18:1_22:6_22:6	994.78	6.33	[M+NH4]+	12130	13410	11870	14540	16340	10530	10630	13370	9811	12010	12680	15880	11470	9633	14310	9982	7795	12550	11710	13690	13620	12930	12980	21760	8774	13520	13550	12350	14780	16600	19330	16320	9887	12360	12710	14540	10200	13060	23210	9662	16190	12390	17020	18000	10640	23790
TG 62:14|TG 18:2_22:6_22:6	992.765	5.994	[M+NH4]+	200.5	239	189.3	470.9	725.6	114.3	43.45	146.6	94.95	537.7	136.4	831.2	325.6	335.6	261.7	435.6	135	200.3	616.6	150	193.8	259.4	111.5	793.8	45.97	45.44	448.4	178.8	230.5	248.5	880.3	49.78	597	223.4	187.7	138	258	219.8	781.2	1234	592.6	174.9	915.5	165	128.4	810
TG 62:2|TG 26:0_18:1_18:1-2	1016.95	8.781	[M+NH4]+	2226	1618	4140	3445	2962	1313	1336	2144	980.6	2201	1673	1408	1406	1545	1316	1273	1212	1027	1833	2007	2232	2707	2142	2710	1016	448.8	1353	746.3	1163	1582	955.2	815.5	990.6	1292	826.4	1186	799	721	1148	483.6	1277	606.3	979.3	2152	893.3	1778
TG 62:2|TG 26:0_18:1_18:1-1	1021.9	8.788	[M+Na]+	3456	3175	4159	5040	3340	2410	1950	2363	795.4	3823	3355	3130	2153	2131	3258	1930	1842	1942	2143	2818	4089	3772	2404	2624	1485	863.3	1709	1600	2976	2462	857.5	1294	2373	1579	1394	622.8	1271	1779	1441	724.4	1169	531.1	1782	2501	872.4	1860
TG 62:3|TG 18:1_18:1_26:1	1014.94	8.567	[M+NH4]+	1164	1526	1378	2197	2064	1150	933.3	1053	1120	2106	1717	1033	740.1	1318	613.4	1362	587	1047	1141	1682	1136	2309	955.1	1813	722.4	375.1	724.1	942.1	1083	1339	1074	971.1	230.4	121.8	869.7	399.4	771.8	144.7	1252	100.7	537.9	942.9	302.1	1037	248.1	1249
TG 62:3|TG 26:0_18:1_18:2	1019.89	8.575	[M+Na]+	2261	3662	3450	4706	3845	2561	1856	1834	1739	4099	2288	1921	1853	2839	2248	1973	1152	1806	2204	2349	3727	4237	1175	3053	1713	1133	1342	1514	1696	2421	1458	1818	544.1	942.5	482.3	1384	1025	1100	1856	546.3	1332	562.3	1208	1600	865.7	2327
TG 62:4|TG 18:1_26:1_18:2	1012.92	8.312	[M+NH4]+	61.18	58.26	488.4	289.3	117.7	43.44	114.1	211.4	42.99	241.3	119.1	284.8	60.14	61.63	44.28	45.73	34.46	280.4	435.6	40.03	173.5	48.28	46.55	55.41	119.7	268.6	0	0	43.76	42.71	238	117	64.19	57.79	48.74	31.41	117.3	54.14	0	159.9	102.2	66.52	267.3	258.5	60.67	48.63
TG 62:5|TG 26:1_18:2_18:2	1015.86	8.082	[M+Na]+	50.91	119.5	284.5	1118	606	625.9	613.9	145.4	246.8	164.2	284.3	255.8	362.4	885.3	109.2	695.9	171	424.1	163.6	832	933.4	933.3	475.8	1487	233.7	264.8	344.6	761.9	116.4	761.4	415.3	195.7	148.6	268.4	444.6	80.63	237	477	232.5	192.5	116	151.9	450.1	505.2	346.8	596.7
TG 64:16|TG 20:4_22:6_22:6	1016.77	5.906	[M+NH4]+	170.3	340.2	343	1560	1526	44.08	242	293.2	557.1	125.5	445.3	580.4	271.6	291	1009	1343	171.6	346.7	556	733.9	901	589.2	742.7	1223	1010	574	1965	169.2	295.3	384.1	1276	629.8	290.3	734.3	281.8	290.3	245.2	643.9	1044	545.7	755.7	848.5	560.6	796.5	523.3	1377
TG 64:17|TG 20:5_22:6_22:6	1014.75	5.565	[M+NH4]+	0	244.7	76.15	406.9	325.1	0	0	87.13	0	514.3	26.88	262.3	59.75	225.6	199.6	164.3	0	170.5	247.1	32.02	70.98	113	551.1	116.8	171.7	152.6	199.2	215.4	125	0	164.4	104	115.9	0	152.7	306	234.7	0	90.31	0	229.6	126.1	0	0	149.3	280.9
TG 66:2|TG 16:0_18:1_32:1	1077.97	9.206	[M+Na]+	139.9	185.6	132.1	52.49	207.2	256.6	313.1	28.57	52.2	229.2	157.4	56.03	121.1	146.1	53.48	117.4	253.3	72.19	146.5	289.6	74.4	51.38	50.37	38.52	98.25	75.24	200.4	50.6	118	45.06	438.1	62.62	184.8	152.6	100.5	128.8	46.15	80.85	231.5	49.86	40.95	30.72	43.19	55.57	220.9	74.42
TG 66:3|TG 16:0_32:1_18:2	1075.95	9.027	[M+Na]+	42.93	48.11	98.56	116.6	184.6	241.7	109.9	179	113.9	199.1	67.62	63.74	142.2	77.37	86.1	83.77	49.71	118.5	33.79	43.72	53.18	141.3	80.04	48.62	98.8	167.2	0	60.37	49.18	392.5	60.09	61.72	197.5	57.81	47.76	37.74	56.16	91.38	46	121	65.48	369.6	0	108.5	41.89	0
TG 67:3|TG 16:0_33:1_18:2	1089.98	9.132	[M+Na]+	58.92	69.51	22.65	82.04	0	67.6	0	51.89	0	59.21	185.9	87.5	62.05	141.6	0	112	82.36	103.9	36.09	42.47	103.4	27.9	44.97	101.6	49.49	65.88	0	188	159.2	0	44.74	0	175	64.47	44.11	148.8	0	78.09	53.2	205.4	0	59.01	58.59	64.2	58.27	54.66
TG 68:2|TG 16:0_18:1_34:1	1101.05	9.393	[M+NH4]+	58.26	55.26	61.28	0	138.4	0	0	141.2	0	0	0	0	53.98	0	42	0	49.49	0	79.66	0	34.34	0	0	381.8	130.4	100.8	35.4	120.5	86.49	173.3	0	40.02	78.16	0	51.21	0	67.85	68.1	59.13	78.89	57.01	38.39	27.66	0	154.9	0
TG 68:3|TG 18:1_18:1_32:1-1	1099.03	9.223	[M+NH4]+	143.5	0	0	168.7	133.7	0	0	0	0	0	0	0	0	0	0	127.3	0	160.2	0	152.2	0	0	0	0	0	269	172.9	0	0	0	0	0	0	0	0	0	75.7	0	0	135.7	0	0	153.7	0	0	0
TG 68:3|TG 18:1_18:1_32:1-2	1103.98	9.226	[M+Na]+	65.69	0	40.01	0	102.4	54.69	60.44	33.76	0	82.98	50.14	75.65	98.04	63.92	38.45	95.04	73.76	98.49	57.11	60.34	60.92	40.53	101.4	67.91	126.1	38.98	62.96	0	38.61	113.3	59.92	221.3	136.4	57.33	138.9	36.1	61.24	64.7	51.85	0	83.6	102.5	0	34.1	46.74	53.11
TG 68:4|TG 18:1_32:1_18:2-1	1097.01	9.051	[M+NH4]+	38.45	0	0	49.44	0	29.99	91.6	42.78	37.74	63.6	43.04	38.36	41.49	30.83	0	0	97.99	45.15	74.84	66.1	0	41.96	78.33	47.26	61.98	45.66	51.67	0	50.2	40.71	0	50.23	119.8	50.93	0	31.11	80.1	54.84	184.9	54.96	65.55	102.8	53.73	30.06	72.15	21.94
TG 68:4|TG 18:1_32:1_18:2-2	1101.96	9.055	[M+Na]+	30.98	54.33	72.1	76.71	39.91	0	125	46.57	113	85.48	47.09	112.5	0	158.9	44.8	55.23	52.04	0	49.71	65.84	50.22	21.99	59.21	175.8	187.5	38.97	31.83	64.95	130.4	81.69	57.23	29.98	28.88	96.23	0	127.8	55.84	48.42	88.4	45.08	40.87	81.68	107.5	65.95	87.41	96.85
TG 69:3|TG 18:1_18:1_33:1	1113.04	9.323	[M+NH4]+	0	51.35	43.43	0	25	43.97	0	44.4	0	53.16	54.52	65.68	53.5	111.8	69.8	61.94	177.4	51.94	0	60.89	56.05	56.26	48.69	43.34	49.95	28.74	27.24	57.29	0	47.55	47.32	37.22	67.76	40.93	0	34.85	0	39.33	58.46	59.92	0	0	0	0	0	0
TG 69:4|TG 18:1_33:1_18:2-1	1111.04	9.156	[M+NH4]+	69.03	73.94	0	42.84	49.26	173.9	96.12	94.49	187.5	36.51	35.66	31.53	0	58.81	64.21	55.6	50.87	0	61.82	43.65	50.87	34.83	96.87	64.36	46.62	0	120.8	0	0	0	118	39.46	32.73	47.8	0	41.56	101.9	55.33	0	48	60.79	50.69	0	0	60.44	0
TG 69:4|TG 18:1_33:1_18:2-2	1115.98	9.155	[M+Na]+	25.27	60.53	50.46	118.2	87.12	22.15	199.3	128	45.43	44.26	66.9	31.19	114.4	118.4	24.59	44.33	48.78	94.22	84.72	52.23	66.36	37.99	56.67	47.2	35.18	45.78	56.59	40.69	73.66	127.4	57.62	106.7	75.03	46.54	68.21	107	35.37	125.5	58.46	50.36	0	38.46	87.83	40.62	0	77.79
TG 70:3|TG 18:1_18:1_34:1	1132.02	9.402	[M+Na]+	0	104.5	43.41	60.95	425	0	52.41	0	89.3	0	37.16	0	42.39	0	0	44.82	84.07	148.1	54.92	95.38	55.16	0	62.95	56.63	34.64	0	37.39	42.75	40.56	0	54.02	0	45.51	89.72	35.29	51.6	0	71.1	40.01	39.39	69.7	42.5	0	142.9	40.56	38.82
TG 70:4|TG 18:1_34:1_18:2	1125.06	9.242	[M+NH4]+	58.26	46.02	67.24	44.27	81.11	0	54.49	79.57	62.42	74.93	97.61	0	43.63	0	0	0	64.4	61.12	59.53	0	47.57	49.64	0	44.29	51.11	32.98	0	72.93	0	42.51	94.69	66.61	60.35	56.44	38.01	42.07	70.32	43.64	0	0	51.6	0	0	0	46.86	0
TG 70:5|TG 34:1_18:2_18:2	1127.99	9.085	[M+Na]+	0	48.68	49.15	103.1	51.42	57.63	54.69	103.2	47.44	136.5	47.52	97.4	0	52.42	232.6	35.02	0	40.8	37.93	123.2	25	43.24	36.1	47.7	49.36	33.3	0	56.24	63.88	50.9	0	48.93	113.3	0	38.01	82.87	97.34	47.72	42.76	54.75	77.41	0	45.47	281.5	0	32
[truncated: 151 more columns]

## Sheet: Lipidomics normalized data
Supplementary Table 6. Normalized Data for statistical analysis (lipidomics analysis).
The raw data were normalized to the total intensity of all detected ions in each sample.
Ctrl: mice fed ad libitum			BST: brainstem	HYT: hypothalamus
F-3h: mice subjected to 3 h of fasting			CBL: cerebellum	OB: olfactory bulb
F-6h: mice subjected to 6 h of fasting			COR: cerebral cortex	SC: spinal cord
F-12h: mice subjected to 12 h of fasting			HIP: hippocampus	QC: quality control
F-24h: mice subjected to 24 h of fasting
Ref: mice fed ad libitum for one day after subjected to 24 h of fasting
class	SC	SC	SC	SC	SC	SC	SC	SC	SC	SC	SC	SC	SC	SC	SC	SC	SC	SC	SC	SC	SC	SC	SC	BST	BST	BST	BST	BST	BST	BST	BST	BST	BST	BST	BST	BST	BST	BST	BST	BST	BST	BST	BST	BST	BST	BST	BST	HYT	HYT
Sample Name	Ctrl-1	Ctrl-2	Ctrl-3	F-3h-1	F-3h-2	F-3h-3	F-3h-4	F-6h-1	F-6h-2	F-6h-3	F-6h-4	F-12h-1	F-12h-2	F-12h-3	F-12h-4	F-24h-1	F-24h-2	F-24h-3	F-24h-4	Ref-1	Ref-2	Ref-3	Ref-4	Ctrl-1	Ctrl-2	Ctrl-3	Ctrl-4	F-3h-1	F-3h-2	F-3h-3	F-3h-4	F-6h-1	F-6h-2	F-6h-3	F-6h-4	F-12h-1	F-12h-2	F-12h-3	F-12h-4	F-24h-1	F-24h-2	F-24h-3	F-24h-4	Ref-1	Ref-2	Ref-3	Ref-4	Ctrl-1	Ctrl-2
BMP 42:10|BMP 20:4_22:6	4.84232e-06	6.10144e-06	5.05306e-06	7.039e-06	8.45738e-06	4.02317e-06	5.29298e-06	7.34844e-06	7.51371e-06	1.07862e-05	7.56374e-06	9.97059e-06	7.67251e-06	5.46472e-06	1.00328e-05	1.16707e-05	4.29227e-06	5.94734e-06	5.87316e-06	7.53309e-06	1.0271e-05	4.38499e-06	6.82459e-06	1.36726e-05	6.12439e-06	6.53235e-06	1.01835e-05	8.51158e-06	6.26174e-06	7.85338e-06	1.1066e-05	6.94976e-06	8.60326e-06	1.07671e-05	7.40989e-06	8.324e-06	6.00761e-06	9.17273e-06	9.87253e-06	9.31169e-06	7.3997e-06	6.57113e-06	9.77099e-06	1.57382e-05	1.35516e-05	1.77805e-05	8.76066e-06	1.2923e-05	1.1526e-05
BMP 44:12|BMP 22:6_22:6	6.36003e-05	7.62249e-05	4.97408e-05	7.51611e-05	0.000102113	4.85338e-05	6.42618e-05	7.63182e-05	7.4828e-05	8.63411e-05	8.06984e-05	9.99664e-05	8.0931e-05	6.14959e-05	8.73031e-05	7.49515e-05	4.40812e-05	7.54395e-05	5.48143e-05	9.18427e-05	9.58753e-05	5.78129e-05	8.35249e-05	0.000160862	7.50918e-05	6.85925e-05	0.000124904	9.3805e-05	7.75269e-05	9.11197e-05	0.000129475	9.00051e-05	0.000100192	0.000117495	9.03563e-05	8.97847e-05	6.19096e-05	0.000108427	0.000129808	9.40136e-05	9.05635e-05	6.6433e-05	0.000122432	0.000181846	0.000163141	0.000228026	0.000103924	5.17545e-05	4.38064e-05
CAR 14:0	4.28736e-05	3.88506e-05	3.96749e-05	5.60571e-05	4.47185e-05	3.93607e-05	5.67586e-05	3.69821e-05	4.34842e-05	4.36811e-05	3.82139e-05	6.46558e-05	6.26147e-05	4.96873e-05	4.33066e-05	4.81791e-05	4.02978e-05	4.92063e-05	4.92906e-05	4.62198e-05	4.27409e-05	3.22912e-05	4.70116e-05	4.90022e-05	4.48154e-05	3.39736e-05	4.13863e-05	5.04923e-05	3.68947e-05	3.42454e-05	4.73764e-05	3.74362e-05	4.42097e-05	3.80655e-05	3.66665e-05	5.53843e-05	5.25011e-05	4.64265e-05	5.99358e-05	3.14321e-05	6.79551e-05	6.17967e-05	5.23278e-05	5.65359e-05	5.03234e-05	5.12999e-05	4.0268e-05	2.53147e-05	1.5005e-05
CAR 16:0	0.00012783	0.00012396	0.000147758	0.000178687	0.000159182	0.000118621	0.000153436	0.000161033	0.000156487	0.000163441	0.00013013	0.000205338	0.000183231	0.000182905	0.000162356	0.000127424	0.000127067	0.000161431	0.000144152	0.000176192	0.000171376	0.000141817	0.000138054	0.000244881	0.00012755	0.000189546	0.000171899	0.000182599	0.000185117	0.000172543	0.000234586	0.000192878	0.000187842	0.000166288	0.000150415	0.000235813	0.000223781	0.000220319	0.000248215	0.000147883	0.000269352	0.000203016	0.000208108	0.000245953	0.000211134	0.000211851	0.000207653	5.21921e-05	3.68538e-05
CAR 16:1	1.68537e-05	1.50656e-05	1.93923e-05	2.32281e-05	2.07814e-05	1.65835e-05	2.42097e-05	2.30979e-05	2.07877e-05	2.56891e-05	1.80809e-05	2.80166e-05	2.28615e-05	2.29446e-05	2.39872e-05	1.69806e-05	1.86385e-05	2.20632e-05	2.23766e-05	1.83951e-05	1.97682e-05	1.60761e-05	1.71328e-05	2.69734e-05	1.52581e-05	2.20889e-05	2.17577e-05	2.1114e-05	2.28586e-05	2.28024e-05	2.42431e-05	2.19953e-05	2.62143e-05	2.28679e-05	1.97239e-05	2.88443e-05	2.72133e-05	2.35844e-05	2.59042e-05	1.54643e-05	2.91181e-05	2.37261e-05	2.37931e-05	2.80202e-05	2.72559e-05	2.63466e-05	2.05387e-05	9.22477e-06	7.57874e-06
CAR 18:1	0.000107184	0.000105335	0.000133973	0.000167315	0.000149017	0.000110326	0.000125123	0.000153011	0.000145978	0.000153036	0.000120493	0.000170692	0.000160505	0.000160483	0.000139896	0.000109678	0.000113356	0.00013243	0.000121677	0.000149601	0.000146811	0.000133868	0.000119312	0.00020385	0.000102379	0.000146928	0.000149291	0.000152029	0.000156408	0.000155077	0.00017393	0.000154543	0.000166469	0.000151	0.00012361	0.000186114	0.000184136	0.000173806	0.000195094	0.000106705	0.000201722	0.000154066	0.000166708	0.000197841	0.000178863	0.00018144	0.000168868	3.57584e-05	2.99719e-05
CAR 18:2	7.068e-06	9.485e-06	1.1107e-05	1.35682e-05	1.46626e-05	9.31827e-06	1.51539e-05	1.5541e-05	1.70784e-05	1.82312e-05	1.20632e-05	3.20283e-05	1.80111e-05	1.87185e-05	2.07134e-05	1.84073e-05	1.67028e-05	2.19369e-05	2.23978e-05	1.21617e-05	1.14315e-05	1.1287e-05	9.07908e-06	1.79584e-05	8.14376e-06	1.7664e-05	1.97935e-05	1.55707e-05	1.3772e-05	1.46344e-05	2.19406e-05	1.75721e-05	2.17644e-05	2.30436e-05	1.64321e-05	2.78217e-05	2.13091e-05	2.55018e-05	2.24903e-05	2.17825e-05	2.82605e-05	2.55983e-05	2.78414e-05	2.2864e-05	2.99102e-05	2.09186e-05	1.75731e-05	6.47453e-06	6.29928e-06
CAR 20:1	9.83253e-06	1.04163e-05	1.25429e-05	1.57838e-05	1.40713e-05	8.01178e-06	9.46329e-06	1.36743e-05	1.97135e-05	1.59822e-05	1.2597e-05	1.77986e-05	1.3744e-05	1.49476e-05	1.42924e-05	1.49416e-05	1.00818e-05	1.66991e-05	1.1442e-05	1.74932e-05	1.62092e-05	1.24263e-05	1.15033e-05	2.49317e-05	9.6315e-06	1.30122e-05	1.78029e-05	1.62621e-05	1.13074e-05	1.16805e-05	2.34203e-05	1.20029e-05	1.69705e-05	1.54448e-05	1.32343e-05	1.7282e-05	1.54615e-05	2.27988e-05	1.99298e-05	1.47125e-05	1.82102e-05	1.52092e-05	2.61148e-05	2.1277e-05	1.78799e-05	2.19424e-05	2.29797e-05	2.02935e-06	1.82554e-06
CAR 20:4	2.13636e-05	2.2288e-05	2.26519e-05	2.62999e-05	3.5889e-05	2.12219e-05	2.74133e-05	2.57593e-05	3.58878e-05	3.05878e-05	2.61646e-05	3.09473e-05	2.85396e-05	2.62195e-05	2.77399e-05	1.71477e-05	2.13954e-05	2.81982e-05	2.0263e-05	2.59149e-05	3.37079e-05	2.27993e-05	2.2348e-05	4.32553e-05	2.661e-05	2.57975e-05	3.49665e-05	3.41097e-05	2.5005e-05	3.01549e-05	4.00097e-05	2.94075e-05	3.42512e-05	3.26071e-05	3.0963e-05	3.70387e-05	2.80133e-05	3.54229e-05	3.58851e-05	2.7266e-05	3.19701e-05	2.73616e-05	4.65855e-05	3.92985e-05	3.24372e-05	5.48923e-05	3.32815e-05	1.66369e-05	1.92735e-05
CE 16:0	0	0	0	0	0	0	0	0	0	0	0	0	0	0	0	0	0	0	0	0	0	0	0	0	0	0	0	0	0	0	0	0	0	0	0	0	0	0	0	0	0	0	0	0	0	0	0	0	3.19156e-08
CE 18:1	3.8415e-08	2.16603e-07	0	1.0784e-07	4.14963e-08	3.79367e-08	1.5175e-07	1.83299e-07	9.06467e-08	1.58981e-07	1.33388e-07	1.31617e-07	8.98179e-08	2.53226e-07	3.53366e-08	0	0	0	1.90652e-07	1.36139e-07	2.96201e-07	0	0	9.63476e-08	1.96014e-07	1.94084e-07	3.59024e-08	2.52303e-07	3.60551e-08	1.3562e-07	1.98996e-07	1.50455e-07	7.43683e-08	1.01426e-07	1.36441e-07	6.2338e-08	1.50296e-07	1.22963e-07	0	0	0	1.62849e-07	7.14185e-08	3.05606e-08	1.00252e-07	2.52562e-07	6.39405e-08	9.4227e-08	1.02193e-07
CE 18:2	1.31711e-06	1.31893e-06	8.57972e-07	9.55527e-07	8.23149e-07	4.31972e-07	8.74669e-07	3.61499e-07	1.41418e-06	1.28995e-06	7.57761e-07	5.1162e-07	6.56539e-07	9.31509e-07	8.09666e-07	7.20286e-07	3.20784e-07	7.80932e-07	9.69467e-07	6.55233e-07	4.96721e-06	1.39564e-06	1.37443e-06	1.31312e-06	5.66115e-07	3.94692e-07	5.7871e-07	5.79003e-07	8.75479e-07	5.2129e-07	1.05685e-06	3.97953e-07	5.06352e-07	3.76686e-07	7.88015e-07	9.51704e-07	0	8.40576e-07	9.61776e-07	6.78857e-07	6.51616e-07	8.84366e-07	1.14518e-06	1.38313e-06	2.46207e-06	1.37821e-06	8.02251e-07	2.96172e-07	5.64594e-07
CE 18:3	2.34795e-06	1.69557e-06	2.76992e-06	1.58296e-06	2.01236e-06	1.70743e-06	1.47394e-06	4.7935e-07	3.41645e-06	4.22529e-07	2.24694e-06	2.2989e-06	1.35609e-06	2.58526e-06	1.36446e-06	8.7339e-07	1.56836e-06	2.36681e-06	1.55284e-06	2.20423e-06	9.23936e-07	3.42453e-06	7.37463e-07	1.14939e-06	8.60912e-07	1.21826e-06	5.82928e-07	1.31162e-06	1.06236e-06	1.25603e-06	6.54392e-07	7.59984e-07	3.13925e-06	1.13787e-06	1.54647e-06	7.73771e-07	9.33069e-07	5.45354e-07	1.57387e-06	1.1312e-06	9.17329e-07	1.71563e-06	7.52772e-07	1.66352e-06	1.94076e-06	8.22688e-07	1.53522e-06	9.53209e-07	2.29975e-06
CE 20:3	3.78732e-08	0	7.56738e-08	0	5.44713e-08	0	0	0	3.95739e-08	4.20008e-08	1.24029e-07	3.27447e-08	3.71075e-08	4.71869e-08	1.55174e-07	6.6489e-08	3.86921e-08	9.58474e-08	5.00868e-08	0	7.69195e-08	3.63914e-08	0	5.07178e-08	3.77504e-08	3.81715e-08	3.51378e-08	3.47503e-08	0	0	3.55897e-08	3.38977e-08	1.30263e-07	3.45328e-08	1.29925e-07	0	0	7.64497e-08	1.014e-07	0	6.80851e-08	3.73558e-08	0	6.48597e-08	3.40221e-08	1.26675e-07	3.5088e-08	0	3.28793e-08
CE 20:4	7.66542e-07	7.92601e-07	4.85633e-07	2.13915e-06	1.24104e-06	9.92659e-07	4.90377e-07	1.16352e-06	4.83681e-06	1.91359e-06	8.49275e-07	1.26016e-06	1.03046e-06	1.30996e-06	1.83266e-06	3.62857e-07	2.57654e-07	9.55947e-07	1.8417e-06	1.311e-06	7.65326e-06	2.05935e-06	1.00094e-06	2.34313e-06	1.17961e-06	1.292e-06	1.15281e-06	4.55325e-07	3.38884e-07	1.41078e-06	1.21247e-06	9.60367e-07	3.00507e-06	9.30331e-07	1.86893e-06	1.30962e-06	2.08348e-07	1.50858e-06	1.43184e-06	9.87039e-07	2.47393e-07	7.6114e-07	3.16216e-06	1.60958e-06	4.63197e-06	4.3491e-06	9.16211e-07	1.74286e-06	2.05203e-06
CE 20:5	1.75785e-06	1.5583e-07	7.23712e-07	5.39461e-07	5.75407e-07	2.50722e-07	1.01518e-06	2.0384e-07	2.13982e-06	3.39613e-07	3.16554e-07	7.38514e-07	9.71444e-07	7.65047e-07	9.30764e-07	7.21677e-07	6.76176e-07	1.85377e-07	6.25433e-07	6.16971e-07	5.72544e-07	3.62391e-07	4.17692e-07	6.2427e-07	9.10268e-07	3.35198e-07	2.47369e-07	8.3657e-07	6.60367e-07	6.73605e-07	5.24279e-07	6.88274e-07	4.72573e-07	6.70749e-07	2.31366e-07	1.12964e-06	7.17854e-07	4.07794e-07	6.44581e-07	5.45182e-07	3.02225e-07	1.07091e-06	1.89534e-07	4.76161e-07	2.84844e-07	4.72167e-07	6.00037e-07	5.20358e-07	1.00505e-06
CE 22:4	0	0	0	0	0	0	0	0	0	0	0	0	0	0	0	0	0	0	0	0	0	0	0	0	0	0	0	0	0	0	0	0	0	0	0	0	0	0	0	0	0	0	0	0	0	0	0	0	0
CE 22:5	0	0	0	0	0	0	0	0	0	0	0	0	0	0	0	0	0	0	3.29379e-08	0	0	0	0	0	0	0	0	0	0	0	0	0	0	0	0	9.63975e-07	0	0	0	0	0	0	5.65527e-07	0	0	5.93935e-07	0	0	0
CE 22:6	1.67658e-06	8.38819e-07	1.59245e-06	2.43065e-06	2.40102e-06	1.47032e-06	2.53197e-06	1.50237e-06	3.10424e-06	1.2544e-06	1.15432e-06	3.85799e-06	3.54455e-06	1.59464e-06	1.87702e-06	1.61734e-06	2.04935e-06	2.29288e-06	4.023e-06	1.74866e-06	3.708e-06	1.74141e-06	1.7126e-06	2.6432e-06	1.43838e-06	5.38217e-07	1.71372e-06	1.3408e-06	1.53158e-06	2.06256e-06	6.13763e-06	1.23849e-06	2.86416e-06	1.12616e-06	3.11377e-06	7.53319e-06	8.72186e-07	2.81986e-06	2.78087e-06	2.24929e-06	2.60516e-06	2.30453e-06	6.1726e-06	2.84279e-06	4.15967e-06	9.03261e-06	1.65112e-06	4.74833e-06	3.49319e-06
CE 24:4	0	0	0	0	0	0	0	0	0	0	0	0	0	0	0	0	0	0	0	0	0	0	0	0	0	0	0	0	0	0	0	0	0	0	0	0	0	0	0	0	0	0	0	0	0	0	0	0	0
CE 24:5	0	0	0	0	0	0	0	0	0	0	0	0	0	0	0	0	0	0	0	0	0	0	0	0	0	0	0	0	0	0	0	0	0	0	0	0	0	0	0	0	0	0	0	0	0	0	0	0	0
CE 24:6	0	0	0	0	0	0	0	0	0	0	0	0	0	0	0	0	0	0	0	0	0	0	0	0	0	0	0	0	0	0	0	0	0	0	0	0	0	0	0	0	0	0	0	0	0	0	0	0	0
Cer 30:1;2O|Cer 18:1;2O/12:0	1.0979e-05	1.08308e-05	1.40679e-05	9.18469e-06	1.19659e-05	8.47631e-06	1.17957e-05	1.91035e-05	1.93673e-05	1.03467e-05	1.20694e-05	9.44699e-06	1.02897e-05	9.72887e-06	1.17606e-05	1.03519e-05	7.06972e-06	8.00455e-06	7.74446e-06	1.09024e-05	1.31356e-05	1.07677e-05	1.00827e-05	1.18129e-05	1.09035e-05	1.48736e-05	1.32721e-05	8.90037e-06	1.1214e-05	1.19072e-05	1.31019e-05	1.10084e-05	9.88971e-06	1.23389e-05	1.00991e-05	1.02799e-05	1.23812e-05	1.16239e-05	1.28044e-05	1.17182e-05	8.90173e-06	9.438e-06	1.08468e-05	1.2307e-05	1.41072e-05	1.7022e-05	1.15345e-05	1.76943e-05	3.07886e-05
Cer 36:0;2O|Cer 18:0;2O/18:0	1.14579e-05	1.35135e-05	1.53071e-05	1.66531e-05	1.50147e-05	1.84153e-05	1.85191e-05	2.07214e-05	1.76734e-05	1.51355e-05	2.01746e-05	1.34613e-05	1.48905e-05	1.33238e-05	1.39263e-05	1.5902e-05	1.9313e-05	1.26238e-05	1.24988e-05	1.59946e-05	1.30305e-05	2.89926e-05	1.31399e-05	9.8435e-06	1.05129e-05	8.41717e-06	1.09942e-05	1.51204e-05	1.13751e-05	1.29712e-05	1.61876e-05	1.27937e-05	1.11182e-05	1.13656e-05	1.35232e-05	1.08396e-05	9.78377e-06	1.02675e-05	1.06623e-05	1.11119e-05	8.91343e-06	8.1969e-06	1.02157e-05	1.20122e-05	1.47609e-05	1.50483e-05	1.03859e-05	4.18526e-05	4.68281e-05
Cer 36:1;2O|Cer 18:1;2O/18:0	0.000137077	0.000143406	0.000136916	0.00014925	0.000172775	0.000172229	0.000182985	0.000213211	0.00024157	0.000151692	0.000175956	0.000159008	0.000155451	0.000160415	0.000168185	0.000156709	0.000184478	0.000155921	0.000150232	0.000134966	0.000133974	0.000161112	0.000145191	0.000124847	0.000181631	0.000141581	0.000170713	0.000201944	0.000161777	0.000162847	0.000209775	0.000167934	0.000177688	0.000188603	0.000196701	0.000188773	0.000159153	0.000170156	0.000146502	0.000203271	0.000145486	0.000159506	0.000190057	0.000137335	0.000168997	0.000185499	0.000130808	0.000970919	0.00118913
Cer 36:2;2O|Cer 18:2;2O/18:0	8.47662e-06	1.20904e-05	9.40251e-06	1.3995e-05	1.73997e-05	1.24787e-05	8.79376e-06	2.41399e-05	2.93423e-05	1.6874e-05	1.42935e-05	1.79093e-05	1.58002e-05	1.75567e-05	1.72212e-05	1.43695e-05	1.62467e-05	1.83936e-05	1.49366e-05	1.15138e-05	1.42433e-05	1.2007e-05	1.18938e-05	1.43125e-05	1.81631e-05	1.94651e-05	1.65881e-05	3.46869e-05	1.26867e-05	1.61524e-05	1.18613e-05	1.54744e-05	1.7305e-05	1.8509e-05	1.92402e-05	2.64105e-05	1.55719e-05	1.56982e-05	1.63247e-05	2.6528e-05	1.78853e-05	1.61215e-05	2.39239e-05	1.55833e-05	1.65941e-05	2.56499e-05	1.33191e-05	0.000216009	0.000293295
Cer 37:1;2O|Cer 18:1;2O/19:0	1.06825e-05	8.08053e-06	7.31896e-06	1.15134e-05	1.06764e-05	1.09262e-05	9.16119e-06	1.57322e-05	1.38513e-05	1.03758e-05	8.87336e-06	1.00064e-05	9.58351e-06	1.02106e-05	8.83803e-06	9.01018e-06	8.71066e-06	8.64206e-06	7.93117e-06	9.45615e-06	1.01814e-05	9.25682e-06	9.35003e-06	1.00744e-05	8.98423e-06	7.21097e-06	8.09535e-06	1.00293e-05	1.06012e-05	9.16013e-06	1.28831e-05	1.00869e-05	1.01574e-05	1.17775e-05	7.37093e-06	1.04606e-05	9.45883e-06	1.0038e-05	8.79165e-06	1.02787e-05	8.16566e-06	8.19077e-06	9.67812e-06	8.91226e-06	9.9412e-06	1.0406e-05	9.90674e-06	1.07822e-05	1.26476e-05
Cer 37:3;3O|Cer 18:1;2O/19:2;O	1.31052e-05	1.83354e-05	1.60466e-05	1.26401e-05	1.19918e-05	1.75236e-05	1.46972e-05	2.59992e-05	2.79591e-05	1.18525e-05	1.4039e-05	1.07716e-05	1.09898e-05	1.58309e-05	1.60595e-05	1.73564e-05	2.21139e-05	1.29903e-05	1.38374e-05	1.13726e-05	1.36108e-05	1.13466e-05	1.34115e-05	6.9472e-06	1.74791e-05	2.33794e-05	1.17126e-05	1.48667e-05	1.41851e-05	1.24768e-05	1.30878e-05	1.38191e-05	1.33297e-05	9.9669e-06	1.66874e-05	1.43096e-05	1.9249e-05	1.18757e-05	9.85342e-06	2.00167e-05	1.19019e-05	1.85928e-05	1.1975e-05	9.93596e-06	1.09673e-05	7.2273e-06	1.3973e-05	6.30264e-05	7.63318e-05
Cer 38:1;2O|Cer 18:1;2O/20:0	7.85724e-05	7.91567e-05	7.09711e-05	8.07819e-05	0.000106903	7.60462e-05	8.73896e-05	0.000123279	0.000123899	9.07034e-05	9.93062e-05	9.53882e-05	8.82847e-05	8.42706e-05	9.44915e-05	7.56265e-05	8.31106e-05	8.12334e-05	7.92412e-05	8.10338e-05	8.69777e-05	9.5231e-05	7.97289e-05	8.62497e-05	8.5788e-05	7.19111e-05	9.18752e-05	9.67035e-05	9.21318e-05	9.36305e-05	0.000119321	9.66868e-05	0.000104102	0.000106793	9.77528e-05	8.8653e-05	7.7187e-05	9.05644e-05	8.88783e-05	0.00011152	9.11612e-05	7.8456e-05	8.86191e-05	0.000110418	0.000115039	9.62872e-05	8.18763e-05	9.34197e-05	9.77396e-05
Cer 38:2;2O|Cer 18:2;2O/20:0	3.33852e-06	2.89931e-06	3.16911e-06	4.9456e-06	5.71687e-06	2.68419e-06	2.37039e-06	5.79658e-06	7.47043e-06	4.83407e-06	3.81792e-06	5.53299e-06	5.51389e-06	3.95908e-06	5.06217e-06	3.44972e-06	3.95499e-06	5.47474e-06	3.97932e-06	4.14585e-06	5.0781e-06	3.77559e-06	4.42003e-06	5.55907e-06	4.71986e-06	3.48458e-06	5.18005e-06	7.32554e-06	4.33474e-06	4.7634e-06	3.9238e-06	4.09346e-06	6.04993e-06	6.52533e-06	6.28866e-06	5.07757e-06	2.93938e-06	5.85805e-06	5.52289e-06	6.71821e-06	5.14146e-06	4.25163e-06	8.77034e-06	5.84051e-06	5.70769e-06	6.64572e-06	4.35314e-06	2.0283e-05	2.56926e-05
Cer 38:7;4O	8.84415e-06	7.19481e-06	6.01442e-06	1.15814e-05	6.2477e-06	6.77096e-06	1.67838e-05	2.12686e-06	1.7913e-06	9.66167e-06	6.72487e-06	1.33831e-05	1.05624e-05	1.16252e-05	7.63902e-06	7.71088e-06	7.79414e-06	8.08732e-06	8.20101e-06	1.0232e-05	7.56944e-06	7.53131e-06	1.13132e-05	2.70386e-05	1.09923e-05	2.08692e-05	1.77963e-05	8.2452e-06	1.54377e-05	1.09164e-05	2.9792e-05	1.57224e-05	1.28779e-05	1.10729e-05	1.42622e-05	1.72616e-05	1.76844e-05	1.3521e-05	1.09235e-05	8.58745e-06	1.90352e-05	1.57947e-05	1.48331e-05	1.59452e-05	1.52702e-05	1.64901e-05	1.78127e-05	6.4016e-06	2.89429e-06
Cer 39:1;2O|Cer 18:1;2O/21:0	5.20473e-06	6.78436e-06	7.20265e-06	7.84617e-06	8.94901e-06	5.81493e-06	7.32263e-06	1.0132e-05	7.98974e-06	7.51219e-06	8.19741e-06	1.00279e-05	7.74238e-06	7.4446e-06	6.59772e-06	7.65034e-06	5.58054e-06	6.22724e-06	6.46217e-06	6.99132e-06	6.94339e-06	9.10381e-06	7.15733e-06	8.95374e-06	5.90511e-06	4.15611e-06	6.69142e-06	1.06268e-05	7.77774e-06	6.94732e-06	8.95547e-06	7.8927e-06	8.59719e-06	1.01055e-05	6.9571e-06	6.84191e-06	6.85714e-06	8.09649e-06	7.18083e-06	7.67904e-06	9.67289e-06	4.99371e-06	6.92537e-06	1.18855e-05	1.02136e-05	1.1099e-05	5.64878e-06	1.1999e-05	1.2684e-05
Cer 40:1;2O|Cer 18:1;2O/22:0	5.50929e-05	4.91427e-05	6.86808e-05	7.51611e-05	5.54015e-05	7.18226e-05	6.50416e-05	6.29962e-05	5.52381e-05	6.39803e-05	7.57761e-05	4.69484e-05	6.03896e-05	5.21197e-05	4.61228e-05	5.51384e-05	5.90243e-05	6.15521e-05	5.5695e-05	5.92037e-05	4.90853e-05	0.000120289	4.5735e-05	2.03132e-05	1.99963e-05	1.32462e-05	1.53707e-05	2.65178e-05	2.34883e-05	2.51077e-05	2.28782e-05	2.55405e-05	1.90539e-05	2.07796e-05	2.32038e-05	1.62049e-05	1.95463e-05	2.0368e-05	2.10317e-05	1.58368e-05	2.55969e-05	1.55292e-05	1.64419e-05	2.44949e-05	2.41433e-05	1.9713e-05	1.79681e-05	1.1725e-05	1.37963e-05
Cer 40:2;2O|Cer 18:2;2O/22:0	1.57115e-05	1.05404e-05	1.95574e-05	1.7823e-05	1.5307e-05	1.68946e-05	1.82311e-05	1.41091e-05	1.73025e-05	1.62665e-05	1.87603e-05	1.52848e-05	1.53993e-05	1.48049e-05	1.25322e-05	1.68623e-05	1.67981e-05	1.70529e-05	1.47604e-05	1.48076e-05	1.38558e-05	2.93238e-05	1.09737e-05	6.83631e-06	4.94831e-06	4.16391e-06	5.03834e-06	7.9471e-06	4.82901e-06	6.17354e-06	9.83501e-06	5.76153e-06	6.28793e-06	5.54555e-06	6.95979e-06	5.73068e-06	6.59378e-06	6.90893e-06	6.93625e-06	4.74344e-06	5.98213e-06	6.24707e-06	6.55323e-06	8.02279e-06	5.44481e-06	7.80887e-06	5.99843e-06	1.47513e-05	2.06891e-05
Cer 40:3;2O|Cer 18:1;2O/22:2	4.99607e-06	4.98049e-06	5.21029e-06	4.63385e-06	5.74876e-06	5.1845e-06	4.02488e-06	8.26905e-06	7.71927e-06	3.59841e-06	3.34649e-06	5.46787e-06	5.76897e-06	5.31388e-06	5.42899e-06	5.49296e-06	6.16199e-06	3.83263e-06	4.67754e-06	4.99863e-06	4.44624e-06	4.9712e-06	3.45711e-06	3.58645e-06	4.32924e-06	5.74098e-06	5.94529e-06	4.82915e-06	3.36785e-06	4.98558e-06	3.26175e-06	5.31519e-06	5.36221e-06	6.35943e-06	5.05794e-06	8.07176e-06	6.34954e-06	4.45709e-06	4.53181e-06	5.45527e-06	5.44291e-06	4.08892e-06	4.72591e-06	4.47056e-06	6.39705e-06	3.86991e-06	5.67598e-06	7.15167e-06	6.76206e-06
Cer 40:7;4O|Cer 20:2;3O/20:5;(2OH)	0.000100961	8.80208e-05	8.63715e-05	9.44416e-05	9.77282e-05	7.66615e-05	0.000139807	3.51079e-05	4.05862e-05	9.35147e-05	8.83246e-05	9.2412e-05	8.80541e-05	9.55289e-05	8.11778e-05	8.03797e-05	6.85195e-05	8.93396e-05	7.99669e-05	0.000104641	8.54947e-05	9.69069e-05	8.03333e-05	0.000161058	9.66675e-05	0.000146077	0.000103219	8.52426e-05	0.000129121	9.10555e-05	0.000169848	0.000101934	0.000111856	8.97801e-05	0.000104128	0.000125099	0.000121979	0.000102118	0.000124649	7.33899e-05	0.000124086	0.00011172	0.000105493	0.000115418	0.000120939	0.000128553	0.000136428	3.56802e-05	2.49194e-05
Cer 41:0;4O|Cer 17:0;3O/24:0;(2OH)	1.31418e-05	1.23478e-05	1.20331e-05	1.17513e-05	1.38055e-05	1.26847e-05	1.53085e-05	2.13661e-05	2.20628e-05	1.1859e-05	1.35052e-05	1.25951e-05	1.39408e-05	1.34868e-05	1.30743e-05	1.4691e-05	1.65635e-05	1.05957e-05	1.30765e-05	1.18766e-05	1.11092e-05	1.34133e-05	1.21009e-05	1.32029e-05	1.62805e-05	1.29697e-05	1.67154e-05	1.29259e-05	1.44491e-05	1.62397e-05	2.07607e-05	1.5508e-05	1.81167e-05	1.77478e-05	1.65463e-05	1.52982e-05	1.5688e-05	1.44982e-05	1.37196e-05	1.77957e-05	1.35131e-05	1.34187e-05	1.51928e-05	1.80152e-05	1.65814e-05	1.33581e-05	1.31248e-05	1.62671e-05	1.65513e-05
Cer 41:1;2O|Cer 18:1;2O/23:0	2.20372e-05	2.06118e-05	2.77351e-05	2.90449e-05	2.92188e-05	2.76023e-05	2.62049e-05	2.9905e-05	2.54862e-05	2.66585e-05	2.78354e-05	2.37835e-05	2.28004e-05	2.2666e-05	1.87068e-05	2.63339e-05	2.41083e-05	2.39208e-05	2.2891e-05	2.59215e-05	1.92009e-05	3.83123e-05	2.24431e-05	1.76648e-05	1.38113e-05	9.23832e-06	1.0747e-05	1.82409e-05	1.56645e-05	1.61524e-05	1.57328e-05	1.45496e-05	1.39176e-05	1.42848e-05	1.53861e-05	1.29244e-05	1.47946e-05	1.53122e-05	1.52413e-05	1.444e-05	2.12506e-05	1.0466e-05	1.53929e-05	1.66603e-05	1.54821e-05	1.53875e-05	1.33482e-05	1.2398e-05	1.35176e-05
Cer 41:2;2O|Cer 17:1;2O/24:1	5.24133e-06	3.83608e-06	5.87011e-06	7.61415e-06	6.33871e-06	5.08496e-06	8.69049e-06	6.45631e-06	6.87849e-06	6.48205e-06	6.44062e-06	7.17023e-06	5.35108e-06	6.99141e-06	5.08963e-06	5.89521e-06	4.84512e-06	7.41127e-06	4.47533e-06	6.58681e-06	5.88921e-06	8.60438e-06	6.05861e-06	6.4971e-06	4.03522e-06	2.88963e-06	4.68505e-06	5.99997e-06	5.01995e-06	4.92779e-06	7.81953e-06	4.26971e-06	6.11398e-06	5.17342e-06	3.94276e-06	4.45651e-06	4.13864e-06	5.17149e-06	5.60314e-06	3.17356e-06	4.50349e-06	3.39177e-06	4.2995e-06	6.01113e-06	6.47979e-06	8.41468e-06	3.91607e-06	7.08916e-06	8.32463e-06
Cer 42:1;2O|Cer 18:1;2O/24:0	4.2881e-05	3.65397e-05	5.55635e-05	8.1527e-05	4.82994e-05	7.51822e-05	4.8307e-05	5.2898e-05	5.11887e-05	5.01308e-05	5.85064e-05	4.10416e-05	4.96033e-05	4.55427e-05	3.57872e-05	4.35164e-05	5.60107e-05	4.86124e-05	4.53944e-05	4.56561e-05	3.96332e-05	0.000103789	4.68962e-05	4.39272e-05	2.13783e-05	1.21301e-05	1.34804e-05	3.54099e-05	2.92571e-05	2.22373e-05	1.84837e-05	5.10476e-05	1.61547e-05	1.56211e-05	1.90185e-05	1.81955e-05	2.49338e-05	2.18587e-05	2.00572e-05	1.48408e-05	2.726e-05	1.37965e-05	1.97186e-05	1.78333e-05	1.82554e-05	2.06823e-05	1.69904e-05	8.84661e-06	1.35568e-05
Cer 42:2;2O|Cer 18:1;2O/24:1	0.000256905	0.000213706	0.000302408	0.000387766	0.000269799	0.000360703	0.000266405	0.000268463	0.000251462	0.000291401	0.000307957	0.000238226	0.000275288	0.00024419	0.00020129	0.000265566	0.000249368	0.000312752	0.000246171	0.000281231	0.000245523	0.000527987	0.000213362	0.000188586	0.000104988	7.41732e-05	0.000102889	0.000189196	0.000125533	0.000138317	0.000139042	0.000169824	0.000107069	0.000120423	0.00012267	9.96699e-05	0.000109377	0.000147147	0.000145349	9.30479e-05	0.000142797	0.000110767	0.000117069	0.000126771	0.000130487	0.00014806	0.000122701	3.21278e-05	3.75942e-05
Cer 42:3;2O|Cer 18:2;2O/24:1	3.79537e-05	4.02923e-05	4.45643e-05	3.48748e-05	3.51383e-05	5.65663e-05	4.6656e-05	6.16468e-05	9.4047e-05	3.74317e-05	3.74651e-05	3.27187e-05	3.95701e-05	4.76218e-05	3.99412e-05	4.28622e-05	5.14134e-05	3.90845e-05	3.40934e-05	3.23207e-05	3.42108e-05	3.78354e-05	4.08864e-05	3.42859e-05	4.60775e-05	5.18361e-05	3.78139e-05	4.61033e-05	4.20947e-05	5.66561e-05	4.29628e-05	5.42778e-05	4.97924e-05	4.61717e-05	4.77511e-05	5.85066e-05	6.79271e-05	5.27293e-05	4.41016e-05	5.06487e-05	4.77765e-05	6.3206e-05	5.02611e-05	4.20898e-05	4.67462e-05	4.48783e-05	4.46645e-05	5.26609e-05	4.59461e-05
Cer 43:1;2O|Cer 18:1;2O/25:0	0	0	0	0	0	0	0	0	0	0	0	0	0	0	0	0	0	0	0	0	0	0	0	0	0	0	0	0	0	0	0	0	0	0	0	0	0	0	0	0	0	0	0	0	0	0	0	0	0
Cer 43:1;3O|Cer 18:1;2O/25:0;O	1.59824e-06	1.76456e-06	2.00672e-06	2.91756e-06	2.69533e-06	2.05583e-06	2.59942e-06	2.21233e-06	2.48834e-06	2.57149e-06	2.18316e-06	2.46562e-06	2.08738e-06	1.76314e-06	9.43437e-07	2.0161e-06	1.43418e-06	1.80701e-06	9.94126e-07	2.89586e-06	2.65124e-06	3.79149e-06	1.63247e-06	2.59428e-06	1.0816e-06	1.28704e-06	1.06844e-06	1.69027e-06	2.187e-06	2.41766e-06	1.62514e-06	1.72839e-06	1.52647e-06	1.49894e-06	1.52564e-06	1.77865e-06	1.41518e-06	2.24154e-06	1.65222e-06	1.74577e-06	2.19457e-06	1.25813e-06	1.52909e-06	2.22995e-06	1.82236e-06	2.26027e-06	1.26716e-06	1.73244e-06	2.9079e-06
Cer 43:2;3O|Cer 18:1;2O/25:1;O	4.75154e-06	4.9322e-06	6.61033e-06	4.95867e-06	3.62146e-06	6.6569e-06	5.7398e-06	9.1087e-06	1.09812e-05	3.49242e-06	4.68245e-06	3.88078e-06	4.95016e-06	4.07187e-06	6.04504e-06	5.59178e-06	6.51833e-06	3.26589e-06	4.41474e-06	3.23605e-06	3.22507e-06	4.00809e-06	4.14704e-06	3.8937e-06	6.4438e-06	4.48656e-06	3.12886e-06	4.80568e-06	5.74444e-06	6.15427e-06	6.08661e-06	6.53559e-06	8.79879e-06	6.2124e-06	5.40593e-06	1.00488e-05	7.04687e-06	6.55018e-06	5.66874e-06	7.81492e-06	5.68783e-06	5.29598e-06	3.91101e-06	6.06194e-06	6.49889e-06	3.4107e-06	5.33474e-06	7.43815e-06	7.70396e-06
Cer 44:1;3O|Cer 20:1;2O/24:0;O	9.14433e-06	7.70527e-06	1.09203e-05	1.05945e-05	9.62002e-06	1.24151e-05	1.02642e-05	1.14327e-05	1.21094e-05	1.0463e-05	1.01289e-05	8.9807e-06	9.75514e-06	8.19402e-06	8.28675e-06	9.61773e-06	1.00085e-05	8.06205e-06	9.49739e-06	9.66835e-06	8.11749e-06	1.24859e-05	9.70382e-06	7.47558e-06	7.16369e-06	4.74751e-06	5.55707e-06	6.90694e-06	8.09124e-06	7.24977e-06	6.89471e-06	7.91482e-06	6.45447e-06	5.90142e-06	7.71891e-06	8.71259e-06	7.82985e-06	6.52544e-06	6.45855e-06	7.69766e-06	9.31622e-06	6.21643e-06	6.43943e-06	8.56224e-06	8.21113e-06	5.86786e-06	6.12858e-06	3.36644e-06	2.5698e-06
Cer 45:1;3O|Cer 20:1;2O/25:0;O	1.05866e-05	8.42268e-06	1.37922e-05	1.3078e-05	1.28223e-05	1.21663e-05	1.11213e-05	9.82091e-06	7.75868e-06	1.19624e-05	1.32695e-05	1.16117e-05	1.05421e-05	1.04158e-05	9.23019e-06	9.88914e-06	1.07417e-05	1.07536e-05	1.1294e-05	1.20888e-05	9.71004e-06	2.51309e-05	1.11366e-05	4.96154e-06	5.29239e-06	2.54713e-06	2.90937e-06	5.89468e-06	6.54205e-06	6.34949e-06	4.30266e-06	4.32735e-06	3.5775e-06	3.02585e-06	4.17184e-06	3.81091e-06	4.69366e-06	6.14134e-06	4.43945e-06	1.92924e-06	6.16339e-06	2.49583e-06	3.53626e-06	4.93662e-06	5.05589e-06	5.47227e-06	4.1291e-06	6.85998e-07	1.53753e-06
Cer 45:2;3O|Cer 18:1;2O/27:1;O	9.86182e-05	8.49856e-05	0.000150271	0.000132414	0.000107959	0.000114474	0.000112548	9.62599e-05	9.13422e-05	0.000115229	0.000120146	0.000103483	0.000120549	9.96735e-05	7.62494e-05	0.000118308	0.00010639	0.000114865	0.000111813	0.000108156	9.0137e-05	0.000200967	0.000107496	4.75345e-05	3.77786e-05	3.16973e-05	3.74052e-05	5.8395e-05	5.26574e-05	5.57635e-05	5.32315e-05	3.4474e-05	4.11082e-05	4.43826e-05	4.76772e-05	4.41152e-05	4.18678e-05	6.21618e-05	5.55473e-05	3.26806e-05	4.98035e-05	3.61848e-05	4.80243e-05	4.49188e-05	4.1724e-05	5.63281e-05	5.2292e-05	1.0079e-05	1.19398e-05
CL 68:4|CL 16:1_18:1_16:1_18:1	1.21021e-05	1.16855e-05	1.003e-05	1.09082e-05	1.24436e-05	9.25606e-06	1.51609e-05	0	0	1.26733e-05	1.27495e-05	1.28231e-05	1.17157e-05	1.16999e-05	1.31659e-05	9.41591e-06	8.76199e-06	1.06462e-05	1.04838e-05	9.9336e-06	1.36946e-05	1.13864e-05	1.24948e-05	1.30399e-05	1.26845e-05	8.949e-06	1.40393e-05	1.21965e-05	1.1497e-05	1.41142e-05	1.59771e-05	1.51595e-05	1.3451e-05	1.61474e-05	1.42219e-05	1.38256e-05	1.03218e-05	1.26179e-05	1.17069e-05	1.40779e-05	1.17135e-05	8.97982e-06	1.29103e-05	1.33859e-05	1.41117e-05	2.0549e-05	1.17974e-05	1.38814e-05	1.28163e-05
CL 72:4|CL 18:1_18:1_18:1_18:1	0.000270376	0.000277514	0.000229032	0.000242869	0.0002405	0.000231574	0.000267951	4.97718e-05	9.08786e-06	0.000245581	0.000279879	0.000242785	0.000234042	0.000236105	0.000277187	0.00024949	0.000212194	0.000226761	0.000249835	0.000237001	0.000230243	0.000218653	0.000268366	0.000215005	0.000313976	0.000264357	0.000318093	0.00026854	0.000277404	0.00031786	0.000307296	0.00036813	0.000301249	0.000331146	0.000347183	0.000295192	0.000280841	0.000289408	0.000298596	0.000342325	0.000287413	0.000262042	0.00027279	0.000274368	0.000293182	0.000260074	0.000281856	0.000201216	0.000204005
CL 72:5|CL 18:1_18:1_18:1_18:2	0.000127977	0.000134653	0.000110064	0.00013248	0.000138587	0.000116548	0.000138612	5.48172e-05	2.83377e-07	0.000133842	0.000143857	0.000140865	0.000129028	0.000136091	0.000157638	0.000166953	0.000124281	0.000132872	0.000143236	0.000135874	0.000155193	0.000130755	0.000155913	0.000134834	0.00017183	0.000119344	0.000167945	0.000160464	0.000153767	0.000176589	0.000166468	0.000203265	0.000179145	0.000185676	0.000186289	0.000160276	0.000144279	0.000172259	0.000163948	0.000200512	0.000170602	0.000145012	0.000183647	0.000193952	0.000182236	0.000203431	0.000168026	9.73523e-05	9.81642e-05
CL 72:7|CL 18:1_18:2_18:2_18:2	0.000106159	0.000107681	9.46282e-05	0.000103788	0.000123705	9.87129e-05	2.1814e-06	4.33844e-07	2.91646e-07	0.000126345	0.000121464	0.000124063	0.000114375	0.000106196	0.000135601	8.76173e-05	9.32657e-05	0.000114297	0.00010216	0.000117373	0.000138042	0.000100484	0.000126238	0.000169212	0.000144613	0.000118776	0.000146919	0.000127166	0.000136231	0.000141142	0.000150906	0.000151796	0.000143882	0.000158221	0.000152229	0.000150527	0.000131394	0.000142508	0.000139298	0.000152712	0.000150138	0.00012166	0.000142052	0.000166101	0.000172497	0.000182227	1.02888e-06	0.000112354	0.000110088
CL 74:11|CL 36:5_38:6	5.0788e-06	5.95244e-06	5.3144e-06	6.39719e-06	6.83632e-06	4.36466e-06	8.14953e-06	0	0	7.97492e-06	6.49192e-06	7.50237e-06	6.02811e-06	5.72494e-06	9.75823e-06	4.40731e-06	4.75274e-06	5.99094e-06	4.7191e-06	5.82555e-06	9.92925e-06	6.24827e-06	7.36105e-06	1.04175e-05	7.22715e-06	6.06859e-06	8.43018e-06	7.4397e-06	7.32612e-06	7.38462e-06	1.07152e-05	7.68696e-06	8.8325e-06	9.37487e-06	8.11527e-06	8.9103e-06	6.58812e-06	7.16871e-06	7.59866e-06	8.4426e-06	8.30924e-06	6.35396e-06	8.16865e-06	1.23133e-05	1.1852e-05	1.76048e-05	7.60811e-06	1.04801e-05	1.00995e-05
CL 74:9|CL 18:1_18:2_18:2_20:4	0.000112602	0.000118373	0.0001031	0.00011418	0.000126628	9.8229e-05	0.000125404	3.46431e-06	4.92877e-06	0.000124277	0.000125762	0.000128882	0.000118242	0.000114417	0.000130814	9.45766e-05	9.79583e-05	0.000112843	0.00010836	0.000119163	0.000139525	0.000113135	0.0001278	0.000150229	0.000136575	0.000114522	0.000150741	0.000126215	0.000134673	0.000139344	0.000156837	0.00015461	0.000151838	0.000154773	0.000147593	0.000144801	0.00012481	0.000141147	0.000146814	0.000151539	0.000146955	0.000119345	0.00014336	0.00018448	0.00017899	0.000206399	0.000143033	0.000107145	0.000105895
CL 76:9|CL 18:1_18:1_18:1_22:6	0.000200531	0.000216948	0.000182005	0.000182544	0.000189411	0.000153461	0.000195589	2.05115e-06	0	0.000182376	0.000214572	0.000217842	0.000171292	0.000202744	0.000215794	0.000169876	0.000155076	0.000185756	0.000183889	0.000182425	0.000212834	0.000159436	0.000205009	0.000290935	0.000257851	0.000234858	0.000291003	0.000262388	0.000271852	0.000259746	0.000265137	0.000325573	0.00029572	0.000272203	0.000283363	0.000274126	0.000251815	0.0002591	0.000288342	0.000283351	0.000284424	0.000231542	0.000262587	0.00034042	0.000346204	0.000360093	0.000260359	0.000208195	0.000197962
CL 78:12|CL 18:1_18:1_20:4_22:6	0.000165681	0.000178387	0.000158886	0.000179406	0.000192267	0.0001377	0.000162428	5.00416e-06	6.00911e-06	0.000169451	0.00018483	0.000193941	0.000169392	0.000172373	0.000178126	0.000135845	0.000123914	0.000153533	0.000154861	0.000174866	0.000192524	0.000150891	0.000176489	0.000266603	0.000206238	0.000192879	0.000252246	0.000225348	0.000225539	0.000218264	0.000221447	0.000246894	0.000253243	0.00024618	0.000225118	0.000234245	0.000195959	0.00021203	0.000239743	0.00023969	0.000240507	0.000184294	0.000224393	0.00032179	0.000310877	0.000329984	0.000220797	0.00014444	0.00013731
CL 78:13|CL 18:1_18:2_20:4_22:6	0.000136835	0.000145621	0.000130168	0.000146597	0.000153801	0.000124428	0.000137839	5.06414e-06	5.05937e-06	0.000141791	0.000149611	0.000145879	0.000139611	0.000136159	0.000136376	0.000115594	0.000103531	0.00012965	0.000127595	0.000154044	0.000154419	0.000124462	0.000144437	0.000186433	0.000153357	0.00013849	0.000169724	0.000146955	0.00016196	0.000157389	0.000181201	0.000177262	0.000178875	0.000167525	0.000162373	0.000158845	0.000141305	0.000157662	0.000177833	0.000165679	0.000168848	0.000139157	0.000153824	0.000225441	0.000202669	0.00021276	0.000171328	5.76613e-05	5.43034e-05
CL 78:14|CL 16:1_18:1_22:6_22:6	4.98289e-05	5.13018e-05	4.82833e-05	4.75999e-05	5.03855e-05	4.26511e-05	5.43981e-05	1.40342e-06	6.73243e-06	5.4086e-05	5.66067e-05	5.03284e-05	4.83619e-05	5.11073e-05	5.38533e-05	4.55624e-05	4.03271e-05	4.24016e-05	4.79097e-05	5.67303e-05	5.88469e-05	5.18183e-05	5.39245e-05	6.23487e-05	5.46654e-05	4.58441e-05	6.10282e-05	4.15368e-05	5.62392e-05	5.54809e-05	6.63321e-05	6.02357e-05	6.25085e-05	6.67496e-05	5.60276e-05	5.71909e-05	4.3935e-05	5.65394e-05	6.0439e-05	6.00225e-05	6.17768e-05	4.74998e-05	5.54736e-05	7.86597e-05	7.37729e-05	8.22082e-05	5.15474e-05	2.55856e-05	2.28832e-05
CL 80:14|CL 18:1_18:1_22:6_22:6	0.00017681	0.000189769	0.000173964	0.000192543	0.000196387	0.000153599	0.000169384	7.66181e-06	1.0077e-05	0.000178628	0.000191	0.000190294	0.000174412	0.000170675	0.00018052	0.000167719	0.000128607	0.000161367	0.000161343	0.000197876	0.000188978	0.000159303	0.000184094	0.000257666	0.000206943	0.000186497	0.00024236	0.00020613	0.000220325	0.000208439	0.000226932	0.000243007	0.000243669	0.000227898	0.000218669	0.000207657	0.000194189	0.000212154	0.000246622	0.000221687	0.000227773	0.000187562	0.00021249	0.000302532	0.000278606	0.00029406	0.000226171	8.73514e-05	8.12863e-05
CL 80:15|CL 18:1_20:4_20:4_22:6	7.59953e-05	8.57444e-05	7.72533e-05	8.74484e-05	9.20811e-05	6.84008e-05	8.22681e-05	1.0698e-05	1.10816e-05	8.3239e-05	8.83246e-05	9.14351e-05	8.0931e-05	7.82033e-05	8.61062e-05	9.56205e-05	6.51247e-05	7.51236e-05	7.22168e-05	9.36331e-05	9.32318e-05	8.02148e-05	8.47472e-05	0.000124267	9.59624e-05	8.58026e-05	0.00011238	9.72299e-05	0.000102376	9.86328e-05	0.00011168	0.000112925	0.000117991	0.000111184	0.000101777	0.000104101	8.90592e-05	9.91496e-05	0.000109681	0.000110982	0.000109274	8.93897e-05	0.0001034	0.000148349	0.000141053	0.000156723	0.000105542	6.25055e-05	5.84739e-05
CL 82:17|CL 18:1_20:4_22:6_22:6	8.80022e-05	8.17435e-05	8.04124e-05	7.92787e-05	8.05211e-05	6.73916e-05	8.34624e-05	3.2454e-06	1.14448e-05	7.95553e-05	8.17383e-05	8.21874e-05	7.44864e-05	7.56214e-05	7.92064e-05	4.71282e-05	6.19572e-05	6.76681e-05	7.271e-05	8.03707e-05	8.13683e-05	7.08089e-05	8.07407e-05	0.000102806	8.74309e-05	8.14061e-05	0.000100978	8.37204e-05	9.18812e-05	8.85512e-05	9.61815e-05	0.000100125	0.000104507	0.00010123	8.96173e-05	8.89666e-05	7.97144e-05	8.83254e-05	9.76425e-05	9.62898e-05	9.60857e-05	7.4412e-05	8.67878e-05	0.000126019	0.000120175	0.000121343	8.92901e-05	3.19038e-05	2.88667e-05
CL 84:19|CL 18:1_22:6_22:6_22:6	8.82219e-05	8.12606e-05	5.72364e-05	8.10433e-05	0.000112211	5.94282e-05	8.26193e-05	1.73178e-05	9.65971e-06	7.08954e-05	6.4427e-05	8.01685e-05	6.09323e-05	5.85335e-05	6.60335e-05	0.000124502	4.84512e-05	7.58186e-05	5.90698e-05	0.000113394	7.808e-05	6.30988e-05	5.61111e-05	0.000122636	8.32709e-05	6.68268e-05	9.78139e-05	7.58558e-05	8.70739e-05	0.000100559	0.000148673	0.000100058	0.000108754	9.72618e-05	7.55097e-05	6.51672e-05	8.07055e-05	6.67389e-05	8.38847e-05	9.42205e-05	8.69904e-05	8.67346e-05	0.000102877	0.00019207	0.000100634	0.000153391	9.54414e-05	2.06529e-05	4.38663e-05
DG 27:5	1.22486e-05	1.34308e-05	2.69597e-05	1.35421e-05	1.47622e-05	2.91023e-05	1.54419e-05	2.70787e-05	2.03395e-05	1.45927e-05	3.35203e-05	4.89738e-05	1.17903e-05	1.32626e-05	3.58083e-05	0.000132157	1.05144e-05	1.43171e-05	1.23861e-05	2.59746e-05	1.89365e-05	2.21766e-05	2.75904e-05	1.34639e-05	9.15909e-06	1.08565e-05	1.30704e-05	9.7103e-06	9.60115e-06	1.18154e-05	1.5588e-05	9.39592e-06	1.03832e-05	9.69365e-06	1.31269e-05	2.86534e-05	1.21979e-05	1.23148e-05	1.33884e-05	1.0236e-05	1.24931e-05	1.04231e-05	1.22497e-05	1.88557e-05	1.97767e-05	1.79804e-05	1.43356e-05	5.19889e-06	4.90712e-06
DG 30:0|DG 14:0_16:0	1.58214e-07	6.45808e-07	5.06742e-07	5.05606e-07	5.70491e-07	7.19609e-07	7.25729e-07	1.63132e-06	1.06489e-06	8.40792e-07	1.13352e-06	2.78213e-07	9.1446e-07	0	3.1584e-07	7.77352e-07	7.71348e-07	3.57801e-07	6.26137e-07	7.57951e-07	1.33271e-06	4.744e-07	5.514e-07	4.63147e-07	1.43626e-06	6.30401e-07	7.7447e-07	8.97458e-07	6.93341e-07	9.32388e-07	1.01348e-06	1.68282e-07	3.39411e-07	5.73617e-07	4.77511e-07	1.16577e-06	6.46564e-07	1.07129e-06	9.32477e-07	1.79957e-06	3.3159e-07	5.64115e-07	7.05682e-07	7.93497e-07	2.83761e-07	5.81879e-07	7.23256e-07	5.65154e-07	1.5936e-06
DG 30:1|DG 14:0_16:1	0	0	0	0	0	0	0	0	0	0	0	0	0	6.19171e-07	0	0	0	0	0	7.3872e-07	0	0	0	0	0	0	0	0	0	0	0	0	0	0	0	0	0	0	0	0	0	0	0	0	0	0	0	0	0
DG 30:8	6.6646e-05	6.71055e-05	7.89047e-05	6.47432e-05	6.76324e-05	6.49238e-05	6.50627e-05	6.89863e-05	7.26565e-05	7.03784e-05	8.19463e-05	9.01977e-05	6.4582e-05	6.33779e-05	8.1741e-05	0.000142804	5.89583e-05	6.53304e-05	6.59886e-05	6.34013e-05	6.76995e-05	6.47812e-05	6.34721e-05	6.88197e-05	6.2647e-05	6.68268e-05	6.12655e-05	5.63845e-05	5.83246e-05	5.64955e-05	5.89016e-05	5.89758e-05	5.64336e-05	6.09985e-05	6.3975e-05	7.46501e-05	6.17964e-05	6.1469e-05	6.10696e-05	5.44286e-05	6.37193e-05	5.70243e-05	6.53492e-05	5.8562e-05	5.9031e-05	6.23377e-05	6.46981e-05	4.59415e-05	4.75849e-05
DG 32:0|DG 16:0_16:0	2.00311e-05	1.78663e-05	1.26793e-05	2.52607e-05	3.55635e-05	1.50903e-05	2.16805e-05	3.41558e-05	4.67453e-05	2.61091e-05	2.57694e-05	2.73263e-05	2.24002e-05	2.3658e-05	2.13189e-05	2.0168e-05	1.85212e-05	2.69093e-05	1.61625e-05	2.3521e-05	3.35016e-05	2.04478e-05	2.53359e-05	3.94066e-05	3.30404e-05	2.51097e-05	4.11227e-05	3.9355e-05	2.73545e-05	3.06943e-05	4.94557e-05	2.80336e-05	3.37321e-05	3.54697e-05	2.97e-05	3.74069e-05	2.3617e-05	4.00062e-05	3.96812e-05	3.50947e-05	2.61101e-05	3.02958e-05	3.94175e-05	3.33582e-05	4.12084e-05	4.66291e-05	3.22325e-05	4.57801e-05	5.42979e-05
DG 32:1|DG 16:0_16:1	1.12236e-06	4.90875e-07	5.69851e-07	5.05998e-07	1.2789e-06	1.1717e-06	1.96502e-06	1.11179e-06	2.9211e-06	1.31321e-06	2.01191e-07	1.00227e-06	4.44951e-07	8.72398e-07	4.87489e-07	8.11452e-07	2.55894e-06	1.31103e-06	5.39548e-07	1.37333e-06	9.56819e-07	1.34265e-06	1.31263e-06	9.54996e-07	2.73715e-06	1.34944e-06	1.32352e-06	1.91542e-06	5.33818e-07	1.38189e-06	4.20954e-06	9.28869e-07	1.22913e-06	1.21919e-06	1.19109e-06	1.48755e-06	2.11746e-06	5.9867e-07	1.90381e-06	6.31195e-07	2.00487e-06	6.5793e-07	2.64157e-06	1.85045e-06	1.18202e-06	1.70353e-06	2.47668e-06	9.55292e-07	1.57564e-06
DG 32:2|DG 14:0_18:2	0	0	0	0	0	0	0	0	0	0	0	0	0	0	0	0	0	0	0	0	0	0	0	0	0	0	0	0	0	0	0	0	0	0	0	0	0	0	0	0	0	0	0	0	0	0	0	0	0
DG 33:1|DG 15:0_18:1	8.41219e-06	8.11227e-06	8.68741e-06	8.89516e-06	1.00851e-05	7.71454e-06	7.10273e-06	1.25123e-05	1.16844e-05	9.35147e-06	9.31082e-06	1.05046e-05	9.49736e-06	8.52015e-06	8.87816e-06	9.16537e-06	1.02284e-05	1.03556e-05	9.27193e-06	9.76782e-06	8.73001e-06	1.02537e-05	1.03965e-05	7.96482e-06	7.91813e-06	9.77157e-06	8.84543e-06	8.38473e-06	8.42978e-06	9.60642e-06	1.00774e-05	8.02875e-06	6.70866e-06	8.53562e-06	8.0145e-06	9.03983e-06	9.38733e-06	9.71084e-06	8.26108e-06	7.16655e-06	8.15981e-06	8.73473e-06	1.03988e-05	6.95643e-06	7.14814e-06	7.95427e-06	9.27866e-06	3.42426e-06	2.43859e-06
DG 33:2|DG 15:0_18:2	1.25634e-05	1.26651e-05	1.37491e-05	1.4078e-05	1.23572e-05	1.69153e-05	1.13883e-05	1.6823e-05	1.40027e-05	1.29447e-05	1.44134e-05	1.13056e-05	1.41782e-05	1.32286e-05	1.26237e-05	1.54983e-05	1.35793e-05	1.44814e-05	1.49084e-05	1.40184e-05	1.21859e-05	2.17262e-05	1.31467e-05	8.84545e-06	1.07596e-05	8.75754e-06	6.60441e-06	8.77796e-06	8.81572e-06	9.32388e-06	7.47512e-06	8.69223e-06	7.49751e-06	7.63782e-06	7.07399e-06	8.35809e-06	1.17306e-05	1.02799e-05	1.0312e-05	6.64786e-06	8.45216e-06	1.08588e-05	9.13659e-06	6.67416e-06	5.12146e-06	6.30647e-06	1.02564e-05	1.13916e-06	8.97253e-07
DG 34:0|DG 16:0_18:0	2.07925e-05	1.99427e-05	1.89687e-05	3.25611e-05	4.01011e-05	1.31479e-05	2.08164e-05	3.60225e-05	5.21161e-05	3.63718e-05	3.26607e-05	3.10319e-05	2.64162e-05	2.6566e-05	2.58319e-05	2.28334e-05	1.74653e-05	3.30696e-05	1.85509e-05	3.2135e-05	4.03037e-05	2.27927e-05	2.75225e-05	4.52123e-05	3.26808e-05	2.34787e-05	4.30473e-05	6.08622e-05	3.40238e-05	4.14887e-05	5.82574e-05	3.11164e-05	4.1978e-05	5.16236e-05	3.16751e-05	3.30029e-05	2.39922e-05	5.14242e-05	3.9885e-05	3.29358e-05	2.78837e-05	2.67625e-05	3.46759e-05	4.63302e-05	5.69942e-05	5.18209e-05	3.806e-05	1.51628e-05	1.66983e-05
DG 34:1|DG 16:0_18:1	0.000180251	0.000185492	0.000172528	0.000265809	0.000310923	0.000170535	0.000223199	0.000397334	0.000540094	0.000285068	0.000241749	0.000318525	0.000245371	0.00028978	0.000259938	0.000290411	0.000240863	0.000382315	0.000215664	0.000286204	0.000321089	0.000274823	0.000261236	0.000393675	0.000334494	0.000281021	0.000417554	0.000436298	0.000286206	0.000311502	0.000576834	0.000239857	0.000312846	0.000393536	0.000311377	0.000357366	0.00032976	0.000457956	0.000455092	0.000387987	0.000317297	0.000346121	0.000550942	0.000347759	0.000400882	0.000524388	0.000467624	0.000191996	0.00021239
DG 34:2|DG 16:0_18:2	2.39261e-06	1.33066e-06	1.88179e-06	2.80057e-06	4.73693e-06	1.84983e-06	4.48505e-06	4.03032e-06	8.90239e-06	3.71991e-06	1.08153e-06	5.38256e-06	2.49373e-06	3.25994e-06	2.82397e-06	4.2041e-06	3.88974e-06	5.73252e-06	4.46194e-06	3.97211e-06	6.55718e-06	2.33424e-06	3.59361e-06	4.67517e-06	4.47308e-06	3.58527e-06	7.32286e-06	8.30862e-06	2.32107e-06	4.15465e-06	1.49247e-05	5.00021e-06	3.77505e-06	4.07394e-06	3.30187e-06	6.58626e-06	5.69682e-06	7.38519e-06	4.17385e-06	6.3623e-06	5.4494e-06	5.18025e-06	1.09155e-05	5.32866e-06	2.58937e-06	6.94257e-06	6.65629e-06	2.80181e-06	3.47304e-06
DG 34:3|DG 16:1_18:2	0	0	0	0	0	0	0	0	0	0	0	0	0	0	0	0	0	0	0	0	0	0	0	0	0	0	0	0	0	0	0	0	0	0	0	0	0	0	0	0	0	0	0	0	0	0	0	0	0
DG 34:4|DG 16:2_18:2	0	0	0	0	0	0	0	0	0	0	0	0	0	0	0	0	0	0	0	0	0	0	0	0	0	0	0	0	0	0	0	0	0	0	0	0	0	0	0	0	0	0	0	0	0	0	0	0	0
DG 35:1|DG 17:0_18:1	2.95269e-06	3.61258e-06	4.69264e-06	5.29134e-06	6.14339e-06	2.87843e-06	4.31152e-06	7.09579e-06	7.97506e-06	6.74702e-06	4.09177e-06	7.59354e-06	4.99086e-06	5.49597e-06	3.79205e-06	4.99537e-06	2.87129e-06	7.98623e-06	4.17026e-06	7.37394e-06	7.20838e-06	5.95682e-06	4.95852e-06	8.18009e-06	4.40891e-06	4.34757e-06	6.90102e-06	6.78643e-06	4.95089e-06	5.81137e-06	1.10851e-05	3.66253e-06	4.86529e-06	7.26048e-06	4.23297e-06	5.06121e-06	5.82283e-06	8.68409e-06	8.26108e-06	3.89367e-06	4.50609e-06	5.89645e-06	7.40345e-06	7.85342e-06	7.65736e-06	8.39651e-06	8.92901e-06	5.65154e-07	7.62229e-07
DG 35:2|DG 17:0_18:2	9.3054e-06	9.71264e-06	9.61359e-06	1.08624e-05	9.57351e-06	1.01132e-05	9.3017e-06	1.36818e-05	1.34309e-05	1.20658e-05	1.1051e-05	1.11819e-05	1.12001e-05	1.12243e-05	8.05441e-06	1.15176e-05	1.1101e-05	1.34515e-05	1.05895e-05	1.18169e-05	1.00904e-05	1.37842e-05	1.12113e-05	9.78479e-06	7.77712e-06	8.85682e-06	9.82752e-06	1.10866e-05	9.33031e-06	9.02207e-06	9.84139e-06	8.42416e-06	9.33144e-06	8.58767e-06	7.88686e-06	9.22389e-06	9.80501e-06	1.1919e-05	1.10509e-05	7.89079e-06	8.94591e-06	9.10918e-06	1.1079e-05	9.50314e-06	8.67579e-06	8.63277e-06	1.13183e-05	2.43303e-06	1.44007e-06
DG 35:3|DG 17:1_18:2	0	5.56063e-07	5.03295e-07	0	0	1.06732e-06	0	2.73561e-06	0	0	0	0	6.24519e-07	0	0	0	0	2.50391e-06	9.52557e-07	0	5.57457e-07	5.55277e-07	0	0	0	0	0	5.7247e-07	0	6.1318e-07	9.26736e-07	0	0	0	0	0	0	2.07763e-06	0	0	0	7.87011e-07	0	0	0	0	6.38693e-07	5.71404e-07	0
DG 36:0|DG 16:0_20:0	4.65416e-06	4.58315e-06	4.4952e-06	5.54166e-06	7.99896e-06	3.0872e-06	4.06844e-06	7.89421e-06	9.55925e-06	7.54839e-06	5.86242e-06	7.40468e-06	6.32999e-06	5.47966e-06	5.6747e-06	5.01347e-06	4.1273e-06	7.53764e-06	4.53451e-06	7.24795e-06	9.0008e-06	7.02128e-06	7.02831e-06	1.00392e-05	5.98549e-06	4.55179e-06	9.00362e-06	7.62998e-06	6.98758e-06	7.08923e-06	9.79036e-06	4.6678e-06	5.92991e-06	7.37108e-06	5.79019e-06	7.56046e-06	5.43346e-06	9.49436e-06	9.3375e-06	4.99934e-06	5.75995e-06	5.2742e-06	7.27265e-06	8.18588e-06	9.6815e-06	9.80804e-06	7.75704e-06	1.19958e-06	1.18309e-06
DG 36:1|DG 18:0_18:1	0.000258223	0.00026289	0.000273259	0.00048907	0.000492959	0.000167909	0.000280175	0.000528905	0.000819916	0.0005132	0.00037583	0.000594849	0.000395022	0.000465007	0.000365546	0.00046481	0.00028493	0.000657727	0.000310497	0.000565115	0.000617484	0.000439823	0.000429983	0.000778217	0.000453442	0.000370866	0.000669669	0.00100718	0.000444578	0.000606951	0.000994344	0.00038026	0.000505812	0.000700025	0.000394074	0.000551729	0.000501153	0.000877687	0.000705727	0.000524352	0.000505571	0.000471526	0.00068737	0.000812942	0.000986609	0.000991103	0.000788006	6.76622e-05	8.7983e-05
DG 36:2|DG 18:1_18:1	5.91563e-05	5.73515e-05	8.53664e-05	8.25465e-05	0.000114603	8.03252e-05	7.30647e-05	0.000149038	0.000204245	8.12356e-05	9.24149e-05	0.000126602	8.75113e-05	0.000101304	9.20203e-05	0.000129025	9.97914e-05	0.000151195	8.7717e-05	9.53573e-05	0.000110963	0.000103796	9.7174e-05	0.000105871	0.000122615	0.000111827	0.000143623	0.000137441	8.11155e-05	9.18903e-05	0.000187452	7.89472e-05	0.000110305	0.000131027	7.85999e-05	0.000130484	0.000139536	0.000134777	0.000127961	0.000147539	0.000119344	0.000106342	0.000149639	0.000101994	0.000122594	0.000147575	0.000155335	6.60475e-05	6.60417e-05
DG 36:3|DG 18:1_18:2	3.04347e-05	2.98209e-05	2.66653e-05	2.87377e-05	2.93915e-05	2.54593e-05	2.90502e-05	3.21916e-05	3.7441e-05	3.43749e-05	3.17178e-05	3.64829e-05	2.78747e-05	3.60781e-05	2.97746e-05	4.52423e-05	4.7564e-05	4.65779e-05	3.01831e-05	3.30634e-05	3.97944e-05	3.18342e-05	3.56576e-05	3.12592e-05	3.83074e-05	3.06975e-05	3.77809e-05	4.73972e-05	3.3604e-05	3.32821e-05	4.73828e-05	3.21954e-05	3.01654e-05	3.27242e-05	2.86184e-05	3.89272e-05	4.10395e-05	4.0167e-05	3.59424e-05	3.70743e-05	2.95858e-05	3.86766e-05	4.79197e-05	2.34787e-05	3.37229e-05	3.32225e-05	5.02783e-05	1.99445e-05	1.68888e-05
DG 36:4|DG 16:0_20:4	7.01529e-05	7.2155e-05	7.00808e-05	8.77751e-05	7.66014e-05	7.12005e-05	7.10273e-05	0.000129771	0.000164756	8.16234e-05	7.50135e-05	9.16305e-05	8.58154e-05	7.96301e-05	9.04713e-05	0.000107243	0.000107637	0.00011695	7.3485e-05	0.000110477	0.000114831	9.83641e-05	9.67666e-05	6.86893e-05	0.000103436	8.35335e-05	8.23245e-05	0.000114545	6.56914e-05	9.57432e-05	0.000111553	6.67633e-05	6.20298e-05	8.37948e-05	6.73138e-05	7.44456e-05	8.31125e-05	9.54384e-05	8.88528e-05	8.7323e-05	6.23095e-05	7.8633e-05	9.6598e-05	6.34798e-05	7.21816e-05	5.95449e-05	0.000117845	4.69208e-05	6.38095e-05
DG 36:5|DG 18:2_18:3	0	0	0	0	0	0	0	0	0	0	0	0	0	0	0	1.13297e-06	0	0	0	0	0	0	4.65159e-07	0	0	0	0	0	0	0	0	0	0	0	0	0	0	0	0	0	0	0	0	0	0	0	0	0	0
DG 37:3|DG 19:1_18:2	0	0	0	7.02593e-07	7.22166e-07	0	0	8.1491e-07	2.2426e-06	8.38207e-07	5.999e-07	5.04326e-07	6.27029e-07	0	7.68126e-07	1.11001e-06	3.61698e-07	4.50805e-07	8.4617e-07	1.90781e-06	1.28113e-06	5.80448e-07	1.43011e-06	0	7.22715e-07	0	4.78062e-07	1.18033e-06	0	7.92401e-07	1.35471e-06	0	0	7.76793e-07	0	1.16032e-06	0	1.12757e-06	9.92986e-07	5.83464e-07	0	6.65896e-07	6.04964e-07	9.64742e-07	9.82153e-07	1.02866e-06	9.10384e-07	0	0
DG 37:4|DG 17:0_20:4	7.77524e-06	8.04328e-06	8.23509e-06	1.17382e-05	9.14167e-06	6.27739e-06	8.45865e-06	1.32845e-05	1.5216e-05	1.11804e-05	8.7146e-06	1.10517e-05	9.91795e-06	9.29471e-06	8.98377e-06	1.14828e-05	9.72251e-06	1.49236e-05	8.78579e-06	1.38659e-05	1.4391e-05	1.09426e-05	1.17478e-05	8.54539e-06	9.48343e-06	8.10516e-06	9.86707e-06	1.36553e-05	7.56311e-06	1.17961e-05	1.88536e-05	8.92009e-06	8.60326e-06	1.07216e-05	7.93389e-06	8.2831e-06	1.00882e-05	1.36447e-05	1.21655e-05	8.48398e-06	8.22478e-06	8.83685e-06	1.11706e-05	9.99869e-06	1.08018e-05	9.60207e-06	1.4627e-05	2.22884e-06	1.89196e-06
DG 38:1|DG 18:0_20:1	4.7757e-05	3.9299e-05	4.66536e-05	7.39847e-05	7.90595e-05	3.16393e-05	4.53633e-05	8.80883e-05	0.00012944	7.74227e-05	6.00246e-05	8.74625e-05	6.64611e-05	6.39894e-05	5.51699e-05	7.32812e-05	4.56357e-05	9.2941e-05	4.82761e-05	8.3421e-05	9.07173e-05	7.04777e-05	7.1845e-05	0.000100718	6.45649e-05	5.18858e-05	8.35109e-05	0.000116257	6.47773e-05	7.1984e-05	0.000113594	4.85411e-05	6.7127e-05	8.30792e-05	5.9924e-05	6.98098e-05	6.4614e-05	0.000100077	9.82795e-05	6.40851e-05	7.05538e-05	6.29881e-05	8.61992e-05	9.57842e-05	0.000101589	0.000106259	0.000103924	7.43815e-06	9.23386e-06
DG 38:2|DG 18:1_20:1	6.36223e-05	6.24769e-05	6.51484e-05	0.000124571	9.87248e-05	4.27894e-05	7.24324e-05	0.000117551	0.000181293	0.000115358	8.25703e-05	0.000129794	9.3956e-05	9.81108e-05	8.27267e-05	0.000127981	7.10711e-05	0.000172171	7.51055e-05	0.000136405	0.000138171	0.000144466	0.000109669	0.000151208	8.0239e-05	6.60255e-05	0.000102164	0.000165665	8.34176e-05	0.000108201	0.000173994	6.44244e-05	7.98971e-05	0.000107151	6.54999e-05	9.60567e-05	0.000100953	0.000152219	0.000133247	7.94598e-05	9.28374e-05	8.68708e-05	0.000121778	0.000127712	0.000152574	0.000174231	0.000168997	7.23501e-06	9.31553e-06
DG 38:3|DG 20:1_18:2	8.63916e-05	7.29138e-05	8.27817e-05	0.000132218	0.000104372	5.89443e-05	7.53129e-05	0.000165306	0.00019644	0.000122597	9.27616e-05	0.000125039	0.000110237	0.000102459	0.000106101	0.000121022	9.60519e-05	0.000146709	8.03896e-05	0.000129972	0.00017157	0.000135656	0.000126034	0.000117418	0.000104494	8.60154e-05	0.000125827	0.000176511	0.000100819	0.000137932	0.000184901	8.1963e-05	0.000100326	0.000143193	9.35809e-05	0.000101783	0.000111572	0.000155868	0.000142801	0.000103325	9.93341e-05	9.87168e-05	0.000145388	0.000135679	0.000132715	0.000163932	0.000167961	5.14576e-05	5.12327e-05
DG 38:4|DG 18:1_20:3	0.000648596	0.000598004	0.00062176	0.000936573	0.000835108	0.000490592	0.000623017	0.00142516	0.0016437	0.000908004	0.000775786	0.000986639	0.000812702	0.000790186	0.000877959	0.000912362	0.000817541	0.00120362	0.000645935	0.00102121	0.00126566	0.000977017	0.000965629	0.000861714	0.000894756	0.000676777	0.00106251	0.00138963	0.000723133	0.00103385	0.00142805	0.000688945	0.000777395	0.00108387	0.000720835	0.000766954	0.000800684	0.00107933	0.00113884	0.000823567	0.000749715	0.000780884	0.0011406	0.00101116	0.00102353	0.00131218	0.00118881	0.000564633	0.000592361
DG 38:5|DG 18:1_20:4	5.24206e-05	5.67583e-05	5.7179e-05	6.51418e-05	6.36197e-05	5.39119e-05	5.62669e-05	9.81341e-05	0.000130599	6.68239e-05	6.50094e-05	6.37962e-05	6.02404e-05	5.78949e-05	6.19711e-05	9.43678e-05	8.04343e-05	0.000105514	5.85273e-05	7.01585e-05	7.78866e-05	8.78984e-05	7.73454e-05	3.90152e-05	6.18996e-05	4.55463e-05	6.1048e-05	8.32765e-05	4.68818e-05	6.43425e-05	7.60906e-05	4.23419e-05	4.95497e-05	6.05105e-05	4.68912e-05	4.85328e-05	5.27488e-05	6.65533e-05	5.81842e-05	5.57046e-05	4.15592e-05	5.33071e-05	6.23211e-05	4.09357e-05	4.00563e-05	4.22854e-05	7.04479e-05	1.98976e-05	2.68196e-05
DG 38:6|DG 16:0_22:6	7.85577e-05	8.3744e-05	7.9479e-05	9.07162e-05	9.98542e-05	7.32051e-05	7.60857e-05	0.000115677	0.000114603	8.42084e-05	8.54821e-05	9.2412e-05	8.975e-05	8.32311e-05	8.79367e-05	9.54813e-05	9.17993e-05	0.000102482	7.86987e-05	9.34342e-05	9.11686e-05	8.54476e-05	9.35071e-05	7.47558e-05	9.33536e-05	6.99681e-05	9.1684e-05	9.3805e-05	8.07092e-05	9.0285e-05	0.000132792	8.53139e-05	9.23704e-05	9.27728e-05	8.17573e-05	9.48977e-05	8.51656e-05	0.000102118	0.00010726	8.66332e-05	7.75052e-05	8.23094e-05	0.000103007	8.19215e-05	7.3391e-05	6.79112e-05	0.00010224	4.52436e-05	3.61188e-05
DG 38:7|DG 16:1_22:6	0	0	0	6.64686e-07	8.94901e-07	0	0	0	0	0	0	0	0	0	5.2579e-07	0	0	0	0	0	0	0	0	8.14095e-07	0	0	0	5.22048e-07	0	7.85338e-07	1.5486e-06	6.52018e-07	0	0	6.49759e-07	0	0	6.3337e-07	0	0	0	0	5.22231e-07	0	0	0	0	0	0
DG 40:1|DG 22:0_18:1	2.4995e-05	2.02393e-05	2.23288e-05	3.55676e-05	3.41949e-05	1.4959e-05	1.78657e-05	4.47489e-05	6.13894e-05	3.53055e-05	2.93468e-05	4.10676e-05	3.16465e-05	3.12405e-05	2.36986e-05	3.19849e-05	2.43649e-05	4.60725e-05	2.47439e-05	3.58817e-05	3.81116e-05	3.33246e-05	3.42044e-05	4.83695e-05	3.44647e-05	2.33653e-05	4.30539e-05	4.94585e-05	3.59942e-05	3.44894e-05	4.92197e-05	2.63783e-05	3.20465e-05	4.34458e-05	2.79668e-05	3.82659e-05	3.49582e-05	4.52018e-05	4.48404e-05	3.32324e-05	3.37372e-05	2.98057e-05	4.33285e-05	4.16445e-05	4.85157e-05	5.89573e-05	4.78696e-05	3.07475e-06	2.53605e-06
DG 40:2|DG 18:1_22:1	2.31427e-05	1.96322e-05	2.15319e-05	3.11755e-05	3.21154e-05	1.41226e-05	2.17227e-05	3.67122e-05	5.23402e-05	3.0032e-05	2.84316e-05	3.81826e-05	2.89737e-05	2.84277e-05	2.43041e-05	3.64805e-05	2.1608e-05	4.43665e-05	2.4906e-05	3.66973e-05	3.708e-05	3.66696e-05	3.27852e-05	4.00655e-05	2.62504e-05	2.25781e-05	3.3635e-05	4.57608e-05	2.64269e-05	2.97889e-05	4.24844e-05	2.04003e-05	2.58637e-05	3.11563e-05	2.29283e-05	2.94646e-05	3.00097e-05	4.27153e-05	3.9643e-05	2.60107e-05	2.83385e-05	2.88661e-05	3.71219e-05	3.77742e-05	3.93434e-05	4.32184e-05	4.87178e-05	2.87525e-06	3.28521e-06
DG 40:4|DG 18:0_22:4	3.67091e-05	3.41805e-05	3.64512e-05	6.4083e-05	5.20198e-05	2.24247e-05	2.9261e-05	6.25614e-05	8.17598e-05	5.90429e-05	4.37116e-05	6.12237e-05	4.49293e-05	4.97756e-05	4.16731e-05	5.74489e-05	3.58765e-05	8.54855e-05	3.68482e-05	7.12195e-05	8.09814e-05	5.95417e-05	5.86236e-05	7.56038e-05	4.84536e-05	3.58527e-05	5.71723e-05	9.71665e-05	4.63604e-05	6.42141e-05	7.35393e-05	4.1598e-05	5.10734e-05	7.08482e-05	3.7869e-05	4.53559e-05	5.32444e-05	8.35627e-05	7.61777e-05	4.61791e-05	5.04531e-05	4.97464e-05	6.67096e-05	7.74679e-05	7.79103e-05	8.01485e-05	8.87074e-05	8.28198e-06	1.0056e-05
DG 40:4|DG 20:0_20:4	3.58452e-05	3.32217e-05	3.56686e-05	6.35994e-05	5.15349e-05	2.23486e-05	2.85866e-05	6.19617e-05	8.0987e-05	5.77826e-05	4.31639e-05	6.09632e-05	4.42034e-05	4.92932e-05	4.08142e-05	5.65929e-05	3.58545e-05	8.37796e-05	3.58477e-05	7.01585e-05	7.98854e-05	5.80381e-05	5.66611e-05	7.54081e-05	4.81504e-05	3.54344e-05	5.68889e-05	9.62151e-05	4.62927e-05	6.44709e-05	7.29015e-05	4.13166e-05	5.10465e-05	7.11085e-05	3.75399e-05	4.53491e-05	5.21259e-05	8.29442e-05	7.56682e-05	4.58066e-05	5.00308e-05	4.93107e-05	6.57939e-05	7.7217e-05	7.70192e-05	7.99667e-05	8.76714e-05	8.2924e-06	9.88176e-06
DG 40:5|DG 18:1_22:4	2.82603e-05	2.18948e-05	2.83454e-05	4.03256e-05	3.95364e-05	2.0261e-05	2.46383e-05	5.2808e-05	6.22781e-05	3.75674e-05	3.17109e-05	4.17319e-05	3.34307e-05	3.09416e-05	3.54352e-05	4.33633e-05	3.34349e-05	4.94401e-05	2.64419e-05	4.46946e-05	4.93884e-05	4.8268e-05	4.58029e-05	3.64125e-05	4.02605e-05	2.30816e-05	3.91321e-05	5.04479e-05	3.17556e-05	3.99411e-05	5.36716e-05	2.58019e-05	3.2424e-05	3.73238e-05	2.33448e-05	3.16394e-05	3.21973e-05	4.7812e-05	4.75729e-05	3.60811e-05	3.10671e-05	3.48096e-05	4.41526e-05	4.08353e-05	3.49769e-05	3.88626e-05	5.27841e-05	5.45881e-06	7.84007e-06
DG 40:6|DG 18:0_22:6	0.000118752	0.000119615	0.000107049	0.000163917	0.000161441	0.000105211	0.00011859	0.000185023	0.000141186	0.000156978	0.000131932	0.000169129	0.000143207	0.000119445	0.000162848	0.000136124	0.00012956	0.000174952	0.000119422	0.000158619	0.000169184	0.000165927	0.000181582	0.000109785	0.000119089	8.86391e-05	0.000138548	0.000184756	0.000126616	0.000156682	0.00020901	0.000127736	0.000107743	0.000148918	0.000117362	0.000115827	0.000102723	0.00013756	0.000182483	0.00011981	0.000116745	0.000120571	0.000122759	0.000171182	0.000123804	0.000134005	0.000151774	2.76326e-05	2.97596e-05
DG 40:7|DG 18:1_22:6	1.05939e-05	1.06784e-05	1.08916e-05	1.06206e-05	1.42573e-05	1.04727e-05	1.30041e-05	1.84798e-05	1.75961e-05	1.15229e-05	1.16264e-05	1.40279e-05	1.29639e-05	1.19921e-05	1.4405e-05	1.61247e-05	1.27727e-05	1.67938e-05	1.11954e-05	1.62863e-05	1.36946e-05	1.48705e-05	1.17614e-05	1.14091e-05	1.34249e-05	1.04098e-05	1.18708e-05	1.44037e-05	1.17814e-05	1.35427e-05	2.2419e-05	9.20157e-06	1.49209e-05	1.40135e-05	1.21595e-05	1.2469e-05	1.46332e-05	1.54569e-05	1.62037e-05	1.25949e-05	1.08754e-05	1.43037e-05	1.73118e-05	1.02747e-05	8.02654e-06	9.78987e-06	1.47306e-05	6.18284e-06	6.12506e-06
DG 40:8|DG 18:2_22:6	0	0	0	0	0	0	0	0	0	0	0	0	0	0	0	0	0	0	0	0	0	0	0	0	0	0	0	0	0	0	0	0	0	0	0	0	0	0	0	0	0	0	0	0	0	0	0	0	0
DG 41:1|DG 23:0_18:1	4.73104e-06	2.87585e-06	3.7801e-06	6.2423e-06	8.54374e-06	2.89157e-06	3.01462e-06	9.13119e-06	1.64215e-05	8.92493e-06	4.61243e-06	9.57984e-06	6.36594e-06	7.10692e-06	6.28301e-06	7.27941e-06	4.5665e-06	9.31306e-06	6.14935e-06	8.83282e-06	9.65846e-06	4.98378e-06	6.97399e-06	1.43315e-05	9.34946e-06	5.68779e-06	1.05657e-05	1.26405e-05	7.93551e-06	8.54047e-06	1.13147e-05	7.89472e-06	9.17636e-06	1.10273e-05	7.51738e-06	1.05328e-05	9.88997e-06	1.24138e-05	1.53438e-05	1.10223e-05	8.14682e-06	6.94421e-06	1.29626e-05	1.23949e-05	1.18902e-05	1.26432e-05	1.35522e-05	8.61534e-07	4.88426e-07
DG 42:1|DG 24:0_18:1	2.25863e-05	1.70661e-05	2.24868e-05	3.82799e-05	3.65733e-05	1.71365e-05	1.5456e-05	4.60683e-05	6.25872e-05	3.83623e-05	2.81543e-05	4.27609e-05	3.17687e-05	2.93517e-05	2.67401e-05	3.45528e-05	2.56701e-05	4.21741e-05	2.8309e-05	3.71615e-05	3.94591e-05	3.73386e-05	3.25136e-05	6.20486e-05	3.83427e-05	2.52019e-05	4.29089e-05	4.9839e-05	4.01853e-05	3.92155e-05	4.88306e-05	3.00039e-05	3.45142e-05	4.37255e-05	3.07615e-05	4.76738e-05	3.97156e-05	5.26179e-05	5.49804e-05	3.52396e-05	3.90255e-05	3.25902e-05	5.58464e-05	4.2761e-05	4.70772e-05	6.26406e-05	5.96994e-05	2.20905e-06	2.19631e-06
DG 42:2|DG 18:1_24:1	2.61225e-05	2.10326e-05	2.56458e-05	3.31428e-05	3.03682e-05	1.95006e-05	2.35493e-05	3.92836e-05	5.3198e-05	2.96119e-05	2.72877e-05	4.00647e-05	3.13548e-05	3.29391e-05	2.44801e-05	3.65084e-05	2.67919e-05	4.30334e-05	2.86895e-05	3.76854e-05	3.60226e-05	3.99815e-05	3.05036e-05	4.73845e-05	3.16373e-05	2.89034e-05	3.82819e-05	4.27228e-05	3.33264e-05	3.61718e-05	4.44361e-05	2.6452e-05	3.34691e-05	3.90479e-05	3.08085e-05	3.56139e-05	3.61193e-05	3.84661e-05	4.6178e-05	3.20046e-05	3.5186e-05	3.11196e-05	4.75338e-05	4.04401e-05	4.18131e-05	5.25721e-05	4.79473e-05	6.52141e-06	5.59694e-06
DG 42:6|DG 18:1_24:5	0	0	0	0	0	0	0	0	0	0	0	0	0	0	0	0	0	0	0	0	0	0	0	0	0	0	0	0	0	0	0	0	0	0	0	0	0	4.6476e-07	0	0	0	0	0	0	0	0	0	0	0
DG 44:2|DG 18:1_26:1	7.58489e-06	3.88506e-06	5.4623e-06	1.25813e-05	9.50707e-06	3.57039e-06	3.44107e-06	1.15977e-05	1.59501e-05	1.00365e-05	6.92453e-06	1.17811e-05	7.16372e-06	7.732e-06	6.61673e-06	9.58989e-06	6.61072e-06	1.16066e-05	6.83136e-06	1.03912e-05	1.02645e-05	1.12605e-05	8.64448e-06	1.33856e-05	8.87705e-06	4.02776e-06	9.86707e-06	1.16194e-05	9.03239e-06	6.9287e-06	1.11553e-05	6.65488e-06	6.56842e-06	8.61369e-06	6.93292e-06	9.68748e-06	7.90065e-06	1.17705e-05	1.31464e-05	7.35279e-06	8.30274e-06	6.7958e-06	1.32176e-05	1.06761e-05	1.0057e-05	1.33278e-05	1.27298e-05	0	0
DG 48:6	6.08109e-06	4.41484e-06	3.84328e-06	3.46591e-06	3.98752e-06	5.09809e-06	4.55671e-06	8.03665e-06	8.62419e-06	4.84441e-06	6.10022e-06	5.08689e-06	5.34226e-06	6.18764e-06	4.79322e-06	6.5285e-06	5.10615e-06	5.08301e-06	5.01995e-06	5.3912e-06	2.86788e-06	4.05711e-06	6.00157e-06	2.80432e-06	5.53071e-06	8.36753e-06	5.52741e-06	3.94437e-06	4.55005e-06	5.09924e-06	2.65456e-06	5.56919e-06	5.56043e-06	5.8832e-06	5.87551e-06	5.71704e-06	6.55697e-06	5.96258e-06	5.44518e-06	6.80305e-06	4.19165e-06	4.79151e-06	5.23735e-06	7.3767e-06	7.47913e-06	6.57908e-06	7.54984e-06	7.43815e-06	1.03718e-05
DG 49:8	0	0	0	0	0	0	0	0	0	0	0	0	0	0	0	0	0	0	0	0	0	0	0	0	0	0	0	0	0	0	0	0	0	0	0	0	0	0	0	0	0	0	0	0	0	0	0	0	0
DG 50:0	2.25057e-06	1.3548e-06	1.36199e-06	2.54437e-06	2.14192e-06	5.44303e-07	1.71772e-06	1.47389e-06	1.15066e-06	2.65874e-06	1.76441e-06	2.01756e-06	2.15522e-06	1.49408e-06	2.47265e-06	1.419e-06	9.86915e-07	1.73246e-06	1.29004e-06	1.2984e-06	3.13739e-06	2.14679e-06	1.64469e-06	3.08351e-06	1.27127e-06	1.65081e-06	1.34922e-06	2.2503e-06	1.62637e-06	1.84423e-06	2.43707e-06	1.83294e-06	1.48332e-06	2.25882e-06	1.71173e-06	1.81683e-06	1.52845e-06	1.44735e-06	2.35285e-06	1.25466e-06	1.81192e-06	1.18052e-06	1.82666e-06	2.56616e-06	2.52381e-06	4.1401e-06	1.31183e-06	4.08265e-06	4.21295e-06
DG 51:6	1.58873e-06	1.01886e-06	1.47758e-06	1.13918e-06	1.0404e-06	1.22216e-06	8.8872e-07	7.94669e-07	2.11741e-07	4.14063e-07	5.72168e-07	1.00032e-06	8.80541e-07	5.48034e-07	8.48389e-07	4.91604e-07	3.55539e-07	3.37014e-07	8.08124e-07	1.19031e-06	2.33144e-06	2.23422e-06	1.2033e-06	1.55187e-06	7.54444e-07	6.19694e-07	2.20213e-06	4.34332e-07	7.19071e-07	7.98823e-07	7.54528e-07	8.37724e-07	2.90057e-07	5.46293e-07	6.81871e-07	1.02329e-06	6.40972e-07	7.34189e-07	5.97129e-07	3.61638e-07	6.70456e-07	2.70824e-07	3.93325e-07	1.31162e-06	1.10882e-06	1.91738e-06	9.98444e-07	1.59441e-06	1.36439e-06
DG 52:0	8.17791e-07	1.92942e-06	1.84231e-06	1.46597e-06	1.20051e-06	4.28862e-07	7.82635e-07	1.10579e-06	5.51608e-07	1.56978e-06	1.20562e-06	1.42753e-06	1.12204e-06	8.50656e-07	1.04623e-06	6.45125e-07	4.76447e-07	9.98911e-07	1.12588e-06	1.0862e-06	2.01293e-06	1.76989e-06	1.424e-06	2.63537e-06	8.70078e-07	1.54445e-06	1.07833e-06	1.2761e-06	1.24382e-06	1.87698e-06	5.67331e-07	1.67545e-06	1.46377e-06	9.29029e-07	1.03994e-06	1.05669e-06	8.34665e-07	9.53147e-07	2.05412e-06	6.63337e-07	1.5501e-06	4.79015e-07	1.1406e-06	1.98656e-06	2.14381e-06	1.74594e-06	1.16744e-06	1.14541e-06	1.70576e-06
DG 52:1	7.38721e-06	7.2155e-06	8.27099e-06	9.94088e-06	9.62002e-06	6.43915e-06	8.31814e-06	6.90612e-06	5.81669e-06	7.65825e-06	9.69906e-06	7.2614e-06	8.0524e-06	7.91545e-06	7.73055e-06	6.00099e-06	5.04749e-06	5.97451e-06	5.56316e-06	7.74529e-06	1.00066e-05	7.1935e-06	7.27277e-06	1.13047e-05	6.06869e-06	5.53462e-06	6.11732e-06	7.30651e-06	7.00789e-06	7.13418e-06	6.3041e-06	5.93243e-06	5.87193e-06	6.64243e-06	7.46363e-06	5.79544e-06	5.70319e-06	5.64219e-06	8.47127e-06	4.62481e-06	7.23079e-06	4.29044e-06	6.67096e-06	1.0488e-05	6.82988e-06	1.10439e-05	5.10812e-06	9.34457e-06	9.12497e-06
DG 52:2	8.77826e-06	7.69148e-06	9.12537e-06	1.29016e-05	1.08225e-05	9.34592e-06	8.97853e-06	7.84173e-06	7.06086e-06	1.07539e-05	8.70073e-06	9.25422e-06	1.03521e-05	7.46022e-06	8.98377e-06	6.73519e-06	5.02036e-06	6.31822e-06	6.70806e-06	7.98402e-06	8.61395e-06	6.54436e-06	8.1216e-06	1.10894e-05	4.95113e-06	4.19866e-06	5.83126e-06	6.70398e-06	7.71207e-06	7.39104e-06	7.743e-06	4.92716e-06	5.31366e-06	5.73292e-06	6.08175e-06	7.05597e-06	4.93224e-06	4.23133e-06	7.5286e-06	3.64742e-06	6.02241e-06	4.15291e-06	8.96001e-06	5.94778e-06	4.16094e-06	8.85692e-06	4.34666e-06	9.6571e-06	7.53518e-06
DG O-40:7|DG O-18:1_22:6	5.20765e-07	4.35965e-07	8.25663e-07	1.04703e-06	1.24834e-06	2.03025e-07	5.61825e-07	1.23923e-06	1.45205e-06	1.32678e-06	7.6816e-07	1.54606e-06	9.42952e-07	1.57086e-06	5.62894e-07	1.40647e-06	3.75336e-07	1.50816e-06	4.55072e-07	1.27718e-06	2.05162e-06	8.63749e-07	7.04189e-07	1.90999e-06	6.44662e-07	8.38171e-07	2.07558e-06	1.28435e-06	1.14496e-06	1.15521e-06	2.39816e-06	8.99381e-07	1.85145e-06	1.12681e-06	1.48735e-06	1.68321e-06	9.4298e-07	2.85326e-06	2.10954e-06	1.20017e-06	1.38964e-06	1.32689e-06	2.43359e-06	1.54371e-06	2.10243e-06	3.78509e-06	1.82336e-06	1.30636e-06	1.73353e-06
FA 9:0	0.000266569	0.000283722	0.000302982	0.000357375	0.0002791	0.000236275	0.000234861	0.000281957	0.000247752	0.000274081	0.000226358	0.00025835	0.000243607	0.000294604	0.000246209	0.00023251	0.000190271	0.000239966	0.000232644	0.000259083	0.000227986	0.000200106	0.000248605	0.000296349	0.000251998	0.000209401	0.000265297	0.000275072	0.000257159	0.000273102	0.000236308	0.000292801	0.000307654	0.000254377	0.000231097	0.00029451	0.000308026	0.00027246	0.000287896	0.000239966	0.000307812	0.000301733	0.000234791	0.000269601	0.000291782	0.000265768	0.000290857	0.000163348	0.000209341
FA 12:0	0.000153308	0.000168661	0.00016463	0.000189014	0.000148751	0.000175305	0.000139807	0.000259542	0.00019389	0.000195625	0.000147739	0.000185084	0.000176922	0.000130792	0.000217483	0.00021365	0.000147744	0.000187019	0.000178041	0.000245754	0.000160609	0.000180301	0.000173433	0.000148598	0.000123672	0.000117996	0.000131891	0.000157293	0.000111246	0.000124896	0.000125585	0.000143955	0.000150759	0.000126863	0.000117698	0.000135802	0.00020141	0.000122468	0.000139744	0.000133261	0.000161247	0.000133778	0.000151078	0.000128528	0.000196558	0.000136792	0.000150026	0.000160691	0.000159687
FA 13:0	3.75437e-05	3.66501e-05	4.0558e-05	4.21033e-05	3.30456e-05	5.11676e-05	3.15794e-05	5.02516e-05	4.38319e-05	4.11607e-05	3.87616e-05	4.34577e-05	3.88713e-05	3.36118e-05	4.77069e-05	4.0684e-05	3.09859e-05	2.52729e-05	3.33184e-05	2.77053e-05	3.10579e-05	2.83037e-05	2.56347e-05	4.08874e-05	4.28482e-05	2.43013e-05	3.16577e-05	3.31584e-05	3.97723e-05	3.65571e-05	2.66795e-05	3.24434e-05	3.6011e-05	3.91715e-05	3.26425e-05	4.77284e-05	4.25757e-05	2.7246e-05	3.77513e-05	4.12335e-05	4.37616e-05	3.86289e-05	3.30605e-05	3.22856e-05	2.48689e-05	2.69221e-05	3.18052e-05	3.63365e-05	3.09247e-05
FA 14:0	0.000218834	0.000200254	0.000200313	0.000243391	0.000216517	0.000186988	0.000193551	0.000241174	0.000224105	0.000217792	0.000220326	0.000262648	0.000231668	0.000210626	0.000231283	0.000228752	0.000209335	0.000240914	0.000207209	0.000207094	0.000192524	0.000183348	0.000168747	0.000258384	0.000193829	0.000206068	0.000226145	0.000213995	0.000175434	0.000184359	0.00021475	0.000184836	0.00023605	0.000219311	0.00021484	0.000185091	0.000229657	0.000238318	0.000208279	0.000230516	0.000227578	0.000223713	0.000258336	0.000205807	0.00020165	0.000239173	0.000193084	0.00022252	0.000186147
FA 15:0	0.000128416	0.000125478	0.000118465	0.000132218	0.00012045	0.000103206	9.14714e-05	0.000112003	0.000115762	0.000100236	0.000109886	0.000121392	0.000100129	0.000107011	0.000124266	0.000102301	0.000102138	8.92133e-05	9.62421e-05	9.75456e-05	7.40181e-05	7.61742e-05	8.46114e-05	0.000124071	9.44112e-05	0.000130548	0.000120092	9.95766e-05	9.58084e-05	7.45525e-05	8.18308e-05	7.88801e-05	0.00011671	0.000100645	0.000105539	9.7352e-05	0.000118439	0.000107067	0.000100891	0.000102911	8.35471e-05	0.000100759	0.000107586	7.02543e-05	7.91833e-05	8.98414e-05	6.43549e-05	0.000101884	8.85819e-05
FA 15:4	6.51671e-05	5.25711e-05	5.68559e-05	5.84558e-05	7.19508e-05	8.64774e-05	6.39878e-05	7.36193e-05	7.78959e-05	5.75564e-05	6.0191e-05	6.93578e-05	5.56342e-05	5.82074e-05	6.352e-05	5.9126e-05	5.8423e-05	4.85429e-05	5.52582e-05	6.18761e-05	6.55718e-05	6.06479e-05	5.3551e-05	7.29293e-05	4.85453e-05	6.35861e-05	4.99747e-05	5.5839e-05	6.61992e-05	7.64789e-05	7.07968e-05	4.68053e-05	5.52267e-05	4.99581e-05	6.03271e-05	6.7376e-05	5.54036e-05	5.1851e-05	5.67575e-05	5.46493e-05	6.84099e-05	6.24707e-05	6.02544e-05	7.15088e-05	7.14814e-05	7.39692e-05	7.83474e-05	5.03794e-05	4.50369e-05
FA 16:0	0.00655112	0.00833991	0.00787611	0.00866641	0.0108757	0.006744	0.00826193	0.00964098	0.0126581	0.00999127	0.00924149	0.0102311	0.00852727	0.00860168	0.00822339	0.00899139	0.00688201	0.0107094	0.00751055	0.010789	0.0107416	0.00867061	0.00838644	0.012792	0.00805915	0.00857317	0.0117917	0.0126215	0.0078678	0.00814876	0.0129284	0.00973771	0.0109766	0.0101881	0.00947902	0.00949659	0.00824046	0.0115293	0.0101846	0.0121397	0.0095566	0.00966744	0.0121712	0.012928	0.0131696	0.0130431	0.0108715	0.0086518	0.00900519
FA 16:1	0.000220665	0.000248266	0.000225729	0.000301363	0.000355037	0.000182771	0.000306942	0.000265764	0.000440637	0.000334184	0.000284871	0.000380393	0.000262738	0.000300651	0.000245434	0.000285261	0.000219013	0.00038598	0.000216932	0.000286271	0.000342495	0.000257734	0.000243241	0.000545339	0.000316232	0.000298466	0.000424541	0.000510822	0.000284514	0.00028434	0.000674802	0.000313041	0.000389979	0.000473558	0.000326022	0.000387567	0.000327565	0.000456348	0.000354647	0.000443374	0.000381419	0.000335501	0.000473245	0.000450945	0.000507499	0.000597267	0.000442954	0.00023799	0.000278921
FA 17:0	0.000147305	0.00022288	0.000189256	0.000185811	0.000225685	0.000155604	0.000171281	0.00020399	0.000273486	0.000199244	0.000203965	0.000214	0.000192254	0.000190378	0.000230297	0.000184908	0.000142685	0.000190052	0.000175998	0.000174203	0.00019433	0.00016957	0.000160531	0.000244294	0.000210328	0.000211954	0.000244271	0.000242282	0.000180445	0.000175947	0.000267816	0.000212045	0.000259851	0.000218855	0.000209398	0.000201385	0.000173446	0.000215556	0.000192228	0.000221963	0.00018535	0.000183205	0.000235969	0.000230083	0.000251617	0.000228329	0.000208689	0.000176005	0.000205366
FA 17:1	0.000105281	0.000127478	0.00013785	0.000126598	0.000161242	7.98413e-05	8.75371e-05	0.000102032	0.000136086	0.00012027	0.000132348	0.00012797	0.00010386	0.000125764	0.000158131	0.000120117	9.50254e-05	0.000110506	9.37762e-05	8.18958e-05	8.11104e-05	8.03472e-05	8.37286e-05	0.000156948	0.000127621	0.000156785	0.00012464	0.000125073	0.00012235	9.06702e-05	0.000135024	0.000113662	0.000154737	0.000113722	0.000114003	0.00011385	0.000128846	0.000117025	0.000119235	0.000114982	0.000105961	9.98061e-05	0.000124263	0.000104503	0.000106236	8.8024e-05	8.89016e-05	5.11087e-05	5.74394e-05
FA 18:0	0.00796559	0.0101196	0.00921871	0.0104115	0.0134733	0.00783205	0.00966702	0.0117026	0.0175884	0.0122791	0.0117304	0.0126342	0.0100265	0.0103275	0.0109551	0.0105851	0.00807276	0.0132177	0.00924375	0.0117439	0.0135915	0.00969069	0.0103625	0.0162232	0.0112532	0.0108494	0.0163594	0.0189576	0.0112736	0.0110577	0.0174696	0.0126865	0.0152445	0.0147031	0.0127775	0.0125849	0.00962095	0.0152652	0.0134012	0.0168438	0.0130583	0.012377	0.0151012	0.0175197	0.0192039	0.0201371	0.0135263	0.0123032	0.0134697
FA 18:1	0.00352155	0.00392645	0.00399549	0.0064253	0.00819163	0.00308098	0.00464101	0.00569763	0.0118621	0.00715416	0.00590263	0.00805593	0.00533412	0.00633032	0.0050678	0.00776656	0.00457676	0.0104314	0.00461483	0.00751983	0.00825289	0.00593364	0.00548752	0.0122636	0.0072201	0.00561972	0.00950455	0.0139724	0.00632132	0.00607786	0.0145165	0.00674201	0.00926401	0.0112746	0.0074905	0.00880122	0.00635379	0.0110654	0.00946489	0.0120638	0.00977099	0.00848283	0.0119292	0.0114979	0.0130487	0.0134792	0.0109427	0.00324039	0.00447755
FA 18:1;O	3.41027e-05	4.17271e-05	4.95972e-05	4.06785e-05	4.04134e-05	4.04114e-05	3.84503e-05	5.54694e-05	4.6042e-05	4.7591e-05	4.17843e-05	6.41153e-05	4.79142e-05	3.58743e-05	5.41702e-05	4.93691e-05	3.59425e-05	4.32293e-05	3.77641e-05	7.76519e-05	4.38435e-05	4.52144e-05	4.36231e-05	5.12397e-05	2.6194e-05	3.88806e-05	3.76952e-05	4.52027e-05	2.62914e-05	3.79955e-05	3.74776e-05	3.70542e-05	3.82629e-05	3.68359e-05	4.30284e-05	5.17233e-05	4.41261e-05	3.77857e-05	3.53246e-05	6.31264e-05	4.56456e-05	3.40403e-05	4.63893e-05	6.42952e-05	4.91395e-05	4.56113e-05	5.51281e-05	4.22902e-05	3.99408e-05
FA 18:2	0.000497996	0.000369881	0.000401488	0.000811087	0.000718844	0.000309687	0.000486864	0.000438117	0.000627959	0.000675994	0.000460757	0.000816664	0.000575065	0.000718845	0.000686385	0.000822587	0.00065308	0.00103935	0.000565968	0.000558218	0.000903304	0.000416375	0.000442274	0.00079583	0.000544187	0.000485529	0.000588201	0.000948832	0.000542553	0.00039787	0.00105621	0.000489834	0.000606543	0.000626574	0.000493769	0.000790814	0.000580159	0.000846142	0.000694899	0.00092703	0.000908884	0.000846922	0.00124263	0.000679334	0.000770828	0.000783311	0.000707716	0.000434622	0.000399408
FA 18:3	0.000101473	3.77331e-05	4.21519e-05	9.37227e-05	7.28145e-05	2.24454e-05	3.57877e-05	3.17868e-05	3.67533e-05	5.82027e-05	5.6274e-05	9.54728e-05	7.03483e-05	8.01057e-05	8.03329e-05	0.00014016	6.33356e-05	6.81104e-05	4.9502e-05	3.04573e-05	4.68545e-05	2.51242e-05	2.66057e-05	8.34969e-05	8.95461e-05	6.52242e-05	5.02515e-05	9.17119e-05	5.93402e-05	2.69121e-05	5.97754e-05	3.76373e-05	4.75202e-05	4.56252e-05	4.38749e-05	5.8043e-05	4.49969e-05	5.14551e-05	5.38085e-05	6.7258e-05	6.331e-05	5.41921e-05	7.99861e-05	3.24424e-05	3.43913e-05	3.9323e-05	2.95713e-05	9.8342e-05	5.62416e-05
FA 19:0	3.43004e-05	3.84229e-05	3.7521e-05	3.5914e-05	4.39544e-05	3.52961e-05	4.21738e-05	5.71037e-05	7.12578e-05	4.15937e-05	4.5431e-05	5.82345e-05	4.01806e-05	3.53036e-05	3.79909e-05	3.79977e-05	3.72036e-05	5.16072e-05	3.67355e-05	4.98669e-05	5.26831e-05	4.7844e-05	4.44176e-05	5.62887e-05	3.74754e-05	4.75389e-05	5.53004e-05	6.65324e-05	3.50462e-05	4.58553e-05	6.75439e-05	4.7509e-05	4.88687e-05	5.94371e-05	4.92022e-05	4.65353e-05	4.37721e-05	5.6261e-05	4.23627e-05	5.89395e-05	5.60857e-05	4.30133e-05	5.58202e-05	6.24385e-05	7.6128e-05	6.28224e-05	6.68219e-05	3.73939e-05	3.92439e-05
FA 20:0	0.000117507	0.000132721	0.000129306	0.000164309	0.00018104	0.000113921	0.000132851	0.000197318	0.000311506	0.000191812	0.000159872	0.000192443	0.000152636	0.000165171	0.000146021	0.000184282	0.000143858	0.000223602	0.000150422	0.00018972	0.000199488	0.000163079	0.000157475	0.000205872	0.000152581	0.000165861	0.000244864	0.000276341	0.000146184	0.000145316	0.000236181	0.000175654	0.0002167	0.000245204	0.000183601	0.000174593	0.00015957	0.000217968	0.000172419	0.000256451	0.000210102	0.000182728	0.000208173	0.00024796	0.000296747	0.000251532	0.000231157	9.87066e-05	9.77287e-05
FA 20:1	0.000512126	0.000510466	0.000609268	0.000917619	0.000973296	0.000446627	0.000589014	0.000754186	0.00146132	0.000928684	0.000754988	0.000982081	0.000721121	0.000890063	0.000621542	0.00105085	0.000667964	0.00135336	0.000679824	0.000881955	0.000998083	0.000827318	0.000686534	0.0014488	0.000817197	0.000761587	0.0011884	0.00169344	0.000811155	0.000755799	0.0015671	0.000861851	0.00119205	0.00139485	0.000930435	0.00101511	0.000933069	0.00138735	0.00115477	0.00133606	0.00123567	0.00105048	0.00125833	0.00141073	0.00182364	0.00147696	0.00139795	0.000179651	0.000247126
FA 20:2	7.52632e-05	8.40889e-05	8.76639e-05	0.000128035	0.000166424	7.41038e-05	0.000110862	0.000110804	0.000176348	0.0001394	0.000111134	0.000156364	0.000121159	0.000132966	0.000114832	0.000164448	0.000117389	0.000213493	0.00011139	0.000134017	0.000155967	0.000111546	0.000115848	0.000201762	0.000123249	9.37447e-05	0.000168142	0.000214629	0.000142325	0.000118924	0.000230823	0.000132562	0.00016748	0.000187497	0.000132814	0.000188091	0.000134651	0.000203866	0.000179043	0.000201615	0.000198538	0.000178235	0.000245714	0.000210888	0.000191466	0.000196948	0.000183307	4.61447e-05	6.68039e-05
FA 20:4	0.00762149	0.00857444	0.00825663	0.0102546	0.0136328	0.00707857	0.00751021	0.00848646	0.0146596	0.00993311	0.0106766	0.0111428	0.00856119	0.00912485	0.0105116	0.00997265	0.00658579	0.0119857	0.00771487	0.00946278	0.0122439	0.00760417	0.00917415	0.0175213	0.0107385	0.00745277	0.0130375	0.0153678	0.0117069	0.00970274	0.0145739	0.00993206	0.0131948	0.0120227	0.0104934	0.0123872	0.00700014	0.0139354	0.0128661	0.0140503	0.0121942	0.0099738	0.0139371	0.0151674	0.0152511	0.0178047	0.0115902	0.00827677	0.0100015
FA 20:5	0.00015243	0.000146793	0.000161758	0.00016542	0.000144101	0.0001124	0.000144724	0.000146114	0.00016066	0.000137978	0.000146075	0.000147638	0.000135744	0.000145196	0.000157427	0.00014691	0.000118488	0.000146899	0.000135556	0.000145755	0.000153839	0.00013049	0.000122978	0.000214874	0.000146799	0.000152672	0.000165901	0.000174925	0.000152413	0.000136134	0.000170614	0.000150656	0.00015049	0.000140656	0.000141413	0.000161162	0.000154332	0.000169105	0.000147324	0.000166162	0.000161442	0.000124996	0.000192411	0.000199597	0.000168806	0.000218879	0.000161422	0.000188871	0.000188706
FA 21:0	1.39471e-05	1.48173e-05	1.50558e-05	1.56204e-05	1.88414e-05	1.28921e-05	1.547e-05	2.95752e-05	4.58875e-05	2.23414e-05	1.90237e-05	2.58219e-05	1.89744e-05	1.90582e-05	1.62567e-05	1.9646e-05	1.7392e-05	2.26635e-05	1.76209e-05	2.08619e-05	2.55324e-05	2.13089e-05	1.94756e-05	2.31639e-05	2.0236e-05	2.17272e-05	3.01944e-05	2.8947e-05	1.75231e-05	1.93156e-05	2.72727e-05	2.49374e-05	2.76167e-05	3.07399e-05	2.33784e-05	2.3104e-05	2.1571e-05	2.65966e-05	2.00253e-05	2.97422e-05	2.20952e-05	1.99136e-05	2.516e-05	2.77379e-05	3.23862e-05	2.53046e-05	2.57316e-05	1.40377e-05	1.43571e-05
FA 22:0	2.92047e-05	3.92231e-05	3.69323e-05	3.91818e-05	4.66252e-05	3.29665e-05	3.79023e-05	8.44148e-05	0.000162129	5.5637e-05	4.63461e-05	6.27672e-05	3.62663e-05	4.6623e-05	4.19055e-05	5.72331e-05	4.44039e-05	7.16486e-05	4.02794e-05	5.34611e-05	6.34892e-05	5.26662e-05	4.83222e-05	6.6928e-05	5.44187e-05	4.75035e-05	8.16653e-05	0.000102114	4.0314e-05	4.6247e-05	8.28513e-05	4.86684e-05	6.8435e-05	8.97151e-05	5.69346e-05	5.54729e-05	4.74251e-05	7.53364e-05	5.71015e-05	9.95316e-05	5.63131e-05	5.96862e-05	6.88024e-05	7.9977e-05	0.000108018	9.89891e-05	8.66354e-05	3.19403e-05	4.1144e-05
FA 22:1	0.000147232	0.000138654	0.000182938	0.000258816	0.000238308	0.000123529	0.000154911	0.000221683	0.000354396	0.000241057	0.000200082	0.000295862	0.000195103	0.000221225	0.000167354	0.000256102	0.000167468	0.000312373	0.00018093	0.000231563	0.000268283	0.00021713	0.000189866	0.000350035	0.000216603	0.000227909	0.000342612	0.000415938	0.000214232	0.00020876	0.000364954	0.00024676	0.000335972	0.000395878	0.000256558	0.000287216	0.000251249	0.000354786	0.000263692	0.000357707	0.000328601	0.000276543	0.000292149	0.000406471	0.000535124	0.000414858	0.000368103	5.25046e-05	7.19218e-05
FA 22:2	1.02572e-05	9.22287e-06	1.13439e-05	1.61433e-05	1.70343e-05	1.15856e-05	1.57089e-05	1.68155e-05	2.2086e-05	1.6092e-05	1.20562e-05	1.87559e-05	1.42053e-05	1.56474e-05	1.32433e-05	1.83307e-05	1.46131e-05	2.48938e-05	1.44786e-05	1.64786e-05	1.74858e-05	1.73743e-05	1.41042e-05	2.08416e-05	1.20923e-05	1.058e-05	1.57135e-05	2.24079e-05	1.47335e-05	1.41078e-05	2.66732e-05	1.44156e-05	1.68559e-05	1.955e-05	1.2623e-05	1.72343e-05	1.50226e-05	1.96444e-05	1.78151e-05	1.84647e-05	2.11986e-05	1.89128e-05	1.96401e-05	2.03236e-05	2.28639e-05	2.13002e-05	1.9671e-05	2.78462e-06	3.7959e-06
FA 22:3	2.51121e-05	1.97702e-05	2.51145e-05	2.91756e-05	3.63674e-05	4.44623e-05	4.06352e-05	5.79733e-05	8.31508e-05	3.26041e-05	2.58318e-05	3.55906e-05	2.78544e-05	3.71924e-05	2.62613e-05	3.90555e-05	2.77304e-05	4.46066e-05	2.93306e-05	4.18498e-05	5.14645e-05	4.28497e-05	4.07914e-05	5.19116e-05	3.73696e-05	3.29879e-05	4.20784e-05	6.02216e-05	2.94264e-05	3.98962e-05	6.56943e-05	3.03256e-05	3.94159e-05	5.00362e-05	3.32135e-05	3.67456e-05	3.77334e-05	4.8214e-05	4.13181e-05	4.67999e-05	4.1975e-05	3.57627e-05	5.64611e-05	5.49426e-05	5.94002e-05	6.11867e-05	5.75238e-05	1.67931e-05	2.28342e-05
FA 22:4	0.000155358	0.000190666	0.000193995	0.000278946	0.000408386	0.000132931	0.000236898	0.000280608	0.000650446	0.000350405	0.000267331	0.000408006	0.000256903	0.000327149	0.000247547	0.000377332	0.000215494	0.000557457	0.000216439	0.000357888	0.000457777	0.000274095	0.000311011	0.000706462	0.000414521	0.000319384	0.000570735	0.000740165	0.000343624	0.000325565	0.000663959	0.000365985	0.00051424	0.000614083	0.000416244	0.000484442	0.000334432	0.000669244	0.000538658	0.000672166	0.000536755	0.000467509	0.000689986	0.000658007	0.000747913	0.000714248	0.000615836	0.000210539	0.000303639
FA 22:5	9.8911e-05	0.000118649	0.000125214	0.000155747	0.000217978	8.97264e-05	0.000155403	0.000166281	0.000235001	0.000191747	0.000176788	0.000193811	0.00014938	0.000156542	0.000149471	0.000166327	0.000112329	0.000213682	0.000116533	0.000172678	0.000194588	0.000145857	0.000156932	0.000289043	0.000176554	0.000145014	0.000213754	0.000243804	0.000184507	0.000160985	0.00030162	0.00018497	0.000218318	0.000236942	0.000199388	0.000219042	0.000167287	0.000237204	0.000224966	0.00024507	0.000216729	0.000178235	0.000260494	0.00024934	0.000242069	0.000298967	0.000229344	8.64659e-05	0.000119833
FA 22:6	0.00129148	0.00171765	0.00150127	0.00203066	0.00352845	0.00131686	0.0019046	0.00230529	0.00369928	0.00266714	0.00244244	0.00289284	0.00221967	0.00218032	0.00196502	0.00260347	0.00157349	0.00332465	0.00159159	0.00266244	0.00245201	0.00195801	0.00204874	0.00435749	0.00277875	0.00198126	0.00325805	0.00359935	0.00285191	0.00242408	0.00476379	0.00273433	0.0034204	0.00378508	0.00290282	0.00330506	0.00220383	0.00341302	0.00354583	0.00421716	0.00345493	0.00281309	0.00380441	0.00398881	0.00365491	0.00475863	0.00352822	0.00107353	0.00143245
FA 23:1	1.57555e-05	1.57072e-05	1.68148e-05	2.62149e-05	3.05276e-05	1.23115e-05	1.80273e-05	2.88555e-05	6.4411e-05	3.17446e-05	2.74333e-05	4.36726e-05	2.33092e-05	3.07446e-05	2.00093e-05	3.50609e-05	2.11681e-05	4.31092e-05	1.92907e-05	3.23406e-05	3.77376e-05	2.13818e-05	2.21918e-05	5.59495e-05	3.91465e-05	3.87176e-05	5.99143e-05	6.75472e-05	2.93316e-05	3.28005e-05	6.78628e-05	3.95138e-05	6.08701e-05	7.41012e-05	4.37204e-05	4.53082e-05	4.18748e-05	5.99722e-05	3.97767e-05	7.12517e-05	5.05051e-05	4.52531e-05	4.51467e-05	7.03797e-05	9.46508e-05	5.92663e-05	6.13764e-05	1.3871e-05	1.4858e-05
FA 24:0	3.43589e-05	4.20582e-05	4.12401e-05	4.09073e-05	5.69162e-05	4.47872e-05	5.2452e-05	9.31862e-05	0.000178357	6.74055e-05	5.60105e-05	7.56749e-05	5.12179e-05	5.66243e-05	5.77749e-05	7.3142e-05	7.28675e-05	9.0161e-05	4.70783e-05	6.13058e-05	7.02785e-05	6.18071e-05	5.65592e-05	7.11028e-05	8.50336e-05	6.76635e-05	0.00011093	0.000126659	5.4973e-05	6.7489e-05	0.000110405	7.29155e-05	9.29773e-05	0.000126017	8.76691e-05	7.74453e-05	7.66702e-05	9.61188e-05	7.18466e-05	0.000141331	7.19181e-05	9.04109e-05	9.83639e-05	8.76297e-05	0.000124058	0.00011159	0.00010742	4.65822e-05	5.22998e-05
FA 24:1	0.000147744	0.000130859	0.00015544	0.000193524	0.000197317	0.000121456	0.000163553	0.000280908	0.000468921	0.000201958	0.000194883	0.000257894	0.00016505	0.000188952	0.000149049	0.000248307	0.000193497	0.000269978	0.000156763	0.000215847	0.000230694	0.000204081	0.000171803	0.000288912	0.000232467	0.000220179	0.000292519	0.000334311	0.000196424	0.000203237	0.000299642	0.00021372	0.000283314	0.000338172	0.000215377	0.000252515	0.000240417	0.000298809	0.000250062	0.000315494	0.000258567	0.000266059	0.000289663	0.000307237	0.000391143	0.000358396	0.000319476	0.000136575	0.000148907
FA 24:2	7.83381e-06	6.12628e-06	6.91762e-06	9.94088e-06	9.93891e-06	7.83896e-06	9.99019e-06	9.94086e-06	2.08804e-05	1.16845e-05	8.95031e-06	1.54801e-05	8.90038e-06	1.11292e-05	8.53317e-06	1.40995e-05	9.06994e-06	1.60609e-05	9.21557e-06	1.17439e-05	1.42749e-05	1.05253e-05	9.53406e-06	1.68951e-05	1.20499e-05	1.09062e-05	1.49555e-05	1.57864e-05	9.75011e-06	8.86154e-06	1.8522e-05	1.34639e-05	1.43275e-05	1.78454e-05	1.27171e-05	1.58913e-05	1.38828e-05	1.57538e-05	1.16432e-05	1.65334e-05	1.70927e-05	1.37046e-05	1.4336e-05	1.82222e-05	2.10371e-05	1.94343e-05	1.8376e-05	2.43355e-06	4.97191e-06
FA 24:3	3.1716e-06	2.11084e-06	2.63279e-06	5.33906e-06	3.75167e-06	2.07795e-06	2.66967e-06	3.76868e-06	4.06635e-06	3.61586e-06	2.73986e-06	4.05141e-06	3.11106e-06	3.85241e-06	3.04294e-06	3.33141e-06	2.77524e-06	4.503e-06	2.56387e-06	2.71616e-06	3.8924e-06	3.2841e-06	3.16376e-06	5.05743e-06	3.44576e-06	3.23072e-06	3.46171e-06	5.50018e-06	3.39967e-06	2.36308e-06	5.48388e-06	4.1712e-06	5.82136e-06	4.12403e-06	3.27432e-06	3.72501e-06	6.14919e-06	4.25607e-06	3.53054e-06	5.06211e-06	5.63196e-06	3.12353e-06	4.36294e-06	4.12807e-06	4.43338e-06	6.14896e-06	6.07872e-06	1.54441e-06	2.13043e-06
FA 24:6	4.88332e-05	5.20882e-05	5.80262e-05	5.54624e-05	5.78397e-05	4.34461e-05	5.42786e-05	4.46889e-05	5.56786e-05	6.31079e-05	6.12934e-05	6.49293e-05	5.60005e-05	5.88529e-05	6.07109e-05	5.46164e-05	4.86419e-05	5.59036e-05	5.09111e-05	6.1034e-05	6.51204e-05	5.52561e-05	5.86236e-05	7.11028e-05	5.62166e-05	6.4586e-05	6.67032e-05	6.2302e-05	5.21766e-05	4.89632e-05	6.62045e-05	6.1556e-05	5.82945e-05	6.59038e-05	5.7304e-05	6.42809e-05	6.35025e-05	6.13701e-05	6.05982e-05	6.28574e-05	6.01591e-05	5.36883e-05	6.45905e-05	6.70552e-05	7.09085e-05	7.57261e-05	6.43549e-05	2.582e-05	3.42295e-05
FA 26:1	1.23584e-05	8.82278e-06	1.15162e-05	1.60583e-05	1.95058e-05	9.38049e-06	1.13883e-05	2.1681e-05	5.23634e-05	2.01118e-05	1.75193e-05	2.70268e-05	1.44428e-05	2.10626e-05	1.48838e-05	2.6313e-05	1.83012e-05	3.6791e-05	1.63316e-05	2.26059e-05	2.67896e-05	2.39584e-05	1.77983e-05	2.9948e-05	2.8824e-05	1.9068e-05	3.76952e-05	5.09934e-05	1.92294e-05	2.3772e-05	4.27013e-05	2.41801e-05	3.41164e-05	4.60351e-05	2.85848e-05	2.89193e-05	2.57479e-05	3.88805e-05	2.72864e-05	4.75517e-05	2.84619e-05	3.16098e-05	3.66183e-05	3.46253e-05	5.32451e-05	4.35758e-05	4.24047e-05	3.26279e-06	5.34813e-06
HexCer 32:1;2O|HexCer 18:1;2O/14:0	4.22879e-05	3.10349e-05	4.95326e-05	3.67309e-05	3.42148e-05	4.3294e-05	3.65675e-05	4.72003e-05	4.09494e-05	3.32116e-05	3.9441e-05	3.17743e-05	4.26974e-05	3.32585e-05	3.18234e-05	3.78724e-05	3.69983e-05	3.37203e-05	3.72568e-05	3.7135e-05	2.89496e-05	5.48322e-05	3.28192e-05	2.03589e-05	1.86496e-05	1.91248e-05	1.54367e-05	1.78223e-05	2.25404e-05	2.0587e-05	1.82732e-05	1.53739e-05	1.56153e-05	1.6193e-05	1.71173e-05	1.77865e-05	2.28666e-05	1.74177e-05	1.76432e-05	1.48504e-05	1.98603e-05	1.76805e-05	1.44603e-05	1.78835e-05	1.36598e-05	1.87619e-05	1.8907e-05	3.28362e-06	2.35148e-06
HexCer 36:1;3O|HexCer 18:1;2O/18:0;O	7.4165e-05	8.17435e-05	7.94072e-05	7.61415e-05	6.20385e-05	7.88044e-05	7.86148e-05	9.40108e-05	8.58555e-05	8.05247e-05	8.99884e-05	6.87717e-05	7.3808e-05	7.86789e-05	7.18842e-05	7.5369e-05	7.76481e-05	7.89146e-05	7.99669e-05	8.17632e-05	8.27223e-05	8.3328e-05	7.50366e-05	6.78412e-05	7.42457e-05	8.08388e-05	6.81533e-05	8.49255e-05	7.16362e-05	7.14702e-05	6.13062e-05	7.29826e-05	7.18736e-05	6.62291e-05	8.00107e-05	7.43774e-05	7.96436e-05	6.93367e-05	6.02861e-05	6.93204e-05	7.89995e-05	7.08718e-05	5.98816e-05	6.6867e-05	7.3391e-05	5.37837e-05	6.76637e-05	3.3529e-05	2.69992e-05
HexCer 36:2;2O|HexCer 18:2;2O/18:0	5.62863e-05	5.07499e-05	5.70641e-05	5.24952e-05	4.85053e-05	5.53912e-05	5.00634e-05	6.66922e-05	5.14747e-05	5.10679e-05	5.27521e-05	5.13248e-05	5.37957e-05	5.33291e-05	4.42782e-05	4.70308e-05	6.14146e-05	4.59777e-05	5.31798e-05	5.70884e-05	4.92078e-05	5.98266e-05	5.06106e-05	4.00002e-05	3.85401e-05	5.71261e-05	4.61518e-05	5.27883e-05	4.77552e-05	5.20969e-05	3.82047e-05	4.47345e-05	4.13981e-05	4.41419e-05	4.69584e-05	4.6024e-05	5.54461e-05	3.92702e-05	4.39296e-05	4.20475e-05	4.57495e-05	4.56548e-05	3.67622e-05	4.70766e-05	5.1361e-05	3.25562e-05	4.98963e-05	1.71265e-05	1.47219e-05
HexCer 36:2;3O|HexCer 18:2;2O/18:0;O	0.000102293	9.48845e-05	0.000103079	9.44677e-05	8.1996e-05	0.000108349	0.00012355	0.00012055	0.000111064	0.000102601	0.00010617	8.89148e-05	9.6812e-05	0.000100475	7.4095e-05	0.000101605	0.00011098	9.20375e-05	9.14582e-05	0.0001085	8.62685e-05	0.000111837	9.17008e-05	8.09268e-05	0.000100884	0.00010948	8.42623e-05	0.000100002	0.000100697	9.84145e-05	9.72148e-05	9.42943e-05	9.08534e-05	8.80301e-05	0.000117295	0.000108757	0.000121582	9.50055e-05	9.20948e-05	9.47171e-05	0.000106539	0.000102414	8.09671e-05	9.05716e-05	0.000102028	6.59059e-05	9.16146e-05	4.7624e-05	4.84179e-05
HexCer 41:2;2O|HexCer 18:1;2O/23:1	6.95159e-05	8.07088e-05	7.72533e-05	6.20047e-05	6.42375e-05	9.70538e-05	9.19632e-05	0.000120625	0.000127354	7.16063e-05	7.44588e-05	7.19628e-05	6.87202e-05	7.51458e-05	7.39964e-05	7.7596e-05	9.81783e-05	6.54568e-05	7.49646e-05	6.85671e-05	6.71837e-05	6.44633e-05	7.47649e-05	7.26032e-05	9.26485e-05	9.99849e-05	8.14017e-05	0.000103636	8.28759e-05	8.2194e-05	9.15893e-05	0.000107966	8.98083e-05	8.83489e-05	7.6383e-05	9.10118e-05	0.000107607	8.28205e-05	6.54135e-05	9.86349e-05	7.94542e-05	8.59857e-05	6.61863e-05	8.01024e-05	8.41482e-05	5.90482e-05	6.47305e-05	7.72985e-05	6.21217e-05
HexCer 42:1;3O|HexCer 18:1;2O/24:0;O	0.000649474	0.000791912	0.000778995	0.000605733	0.000553018	0.00108598	0.000782635	0.00148363	0.00162979	0.000651436	0.000729336	0.000695532	0.00063076	0.000692347	0.00068899	0.00098961	0.000893063	0.000597072	0.000747532	0.000569955	0.000643209	0.000557794	0.000674854	0.000592698	0.00118314	0.00099914	0.000905635	0.000834668	0.000950636	0.0010987	0.00109193	0.00101063	0.00106664	0.000887392	0.00113533	0.00132939	0.0012927	0.000936447	0.000883432	0.0013333	0.000946564	0.00124655	0.000935896	0.000860615	0.000996793	0.000732423	0.000754984	0.00142252	0.00105787
HexCer 42:2;2O|HexCer 18:1;2O/24:1	0.00319576	0.00364569	0.00333209	0.00290645	0.00282887	0.00430936	0.00373895	0.00442541	0.00489786	0.00283258	0.00339779	0.00293778	0.00306086	0.00337884	0.00363294	0.00384361	0.00486712	0.00306118	0.0040533	0.00266112	0.00246555	0.00332782	0.00328599	0.00302807	0.00475934	0.004132	0.00342283	0.00548749	0.00427447	0.00354975	0.00301173	0.00473549	0.00430702	0.0036426	0.00346108	0.00451787	0.00493436	0.00327509	0.00259234	0.0047262	0.00408121	0.00403854	0.0029568	0.00339479	0.00394262	0.00267222	0.00263726	0.00181005	0.00153426
HexCer 42:2;3O|HexCer 18:1;2O/24:1;O	0.00137055	0.00162452	0.00175759	0.00122088	0.0011746	0.00225491	0.00174723	0.00265689	0.00360037	0.00128995	0.00145035	0.00128556	0.00139136	0.00160211	0.00145669	0.00165909	0.0019709	0.00123648	0.00146477	0.00118102	0.001187	0.00124727	0.0014335	0.00128833	0.00214347	0.00213939	0.0015898	0.00172895	0.00180986	0.00221667	0.00172272	0.00222969	0.0021171	0.00183138	0.00220483	0.00245152	0.00263213	0.00206093	0.0016089	0.00222239	0.00194185	0.00247745	0.00175799	0.00167544	0.00202796	0.00155996	0.00173076	0.00226895	0.00192572
HexCer 42:3;3O|HexCer 18:1;2O/24:2;O	0.000137275	0.000125823	0.000137778	0.000108951	0.000110816	0.000180766	0.000157581	0.000200092	0.000214755	0.000122403	0.000124029	0.000125235	0.000127197	0.00013548	0.000121872	0.000146632	0.000163215	0.000120931	0.000132245	0.000126458	0.000118313	0.000121415	0.000120466	0.000104893	0.000169362	0.000159125	0.000135384	0.000134143	0.000147403	0.000157581	0.000156391	0.000160977	0.00015649	0.000150349	0.000163246	0.000171048	0.000166154	0.000149807	0.000127642	0.000165403	0.000147344	0.000195255	0.000120535	0.00013273	0.000154229	0.000107652	0.000133191	0.000178505	0.000157237
HexCer 43:2;2O|HexCer 18:1;2O/25:1	3.9579e-05	4.76458e-05	4.57489e-05	4.11622e-05	3.52645e-05	5.75341e-05	5.45737e-05	6.98184e-05	7.7355e-05	3.87372e-05	4.41207e-05	3.66717e-05	3.41701e-05	4.58077e-05	4.89742e-05	4.48734e-05	5.82324e-05	4.30839e-05	4.87129e-05	3.43631e-05	3.85822e-05	3.73055e-05	5.17786e-05	5.42078e-05	9.08153e-05	5.7431e-05	5.8629e-05	0.000119555	7.79332e-05	5.20583e-05	5.63249e-05	9.48304e-05	7.67282e-05	6.34186e-05	4.85842e-05	6.8719e-05	8.6723e-05	4.89439e-05	4.0643e-05	0.000107257	7.09436e-05	4.92767e-05	4.12814e-05	6.23444e-05	8.59941e-05	4.08618e-05	4.34278e-05	4.11026e-05	3.29827e-05
HexCer 44:2;2O|HexCer 18:1;2O/26:1	1.03231e-05	1.37274e-05	1.32609e-05	1.1052e-05	6.67688e-06	2.02403e-05	1.48026e-05	2.37801e-05	2.4412e-05	9.86202e-06	1.09054e-05	7.33955e-06	9.44309e-06	1.09593e-05	1.57568e-05	1.47746e-05	1.84038e-05	9.80588e-06	1.42531e-05	9.19753e-06	8.53013e-06	1.27045e-05	1.22707e-05	9.66738e-06	2.89862e-05	1.45155e-05	1.48962e-05	3.98814e-05	2.02247e-05	1.17383e-05	9.41406e-06	2.60767e-05	1.82718e-05	1.34735e-05	1.31739e-05	1.69889e-05	2.30223e-05	1.05335e-05	8.96808e-06	3.5212e-05	2.26669e-05	1.38135e-05	8.99271e-06	1.43708e-05	2.68294e-05	8.89933e-06	8.76066e-06	1.18917e-05	1.03445e-05
HexCer 44:2;3O|HexCer 18:1;2O/26:1;O	9.12236e-06	1.09267e-05	1.92415e-05	1.75812e-05	1.33072e-05	1.9473e-05	1.57511e-05	2.33003e-05	3.01847e-05	1.71842e-05	1.43579e-05	1.49136e-05	1.62337e-05	1.50292e-05	1.29547e-05	1.88249e-05	1.51777e-05	1.44624e-05	1.50775e-05	1.62797e-05	1.55515e-05	1.83149e-05	1.74112e-05	1.94913e-05	1.91008e-05	1.23598e-05	1.19829e-05	1.95284e-05	1.96221e-05	2.496e-05	1.71698e-05	2.08158e-05	1.88854e-05	1.59067e-05	1.75607e-05	2.60628e-05	2.37798e-05	1.58157e-05	1.80635e-05	1.69266e-05	1.50658e-05	1.45624e-05	1.23478e-05	2.20423e-05	2.27493e-05	1.80046e-05	1.6563e-05	1.31105e-05	1.13518e-05
LPC 14:0	0.00012395	0.000116855	0.000118536	0.000117055	0.000108624	0.000105833	0.000128215	0.000125123	0.000129054	0.000109413	0.000111758	9.94454e-05	0.000115325	0.000118766	0.000108143	7.99621e-05	0.000116216	0.000108863	0.000123227	0.000117307	0.000114057	0.000109161	0.000120398	0.000116635	0.000120358	0.000120762	0.000117785	0.000105729	0.00011409	0.000111219	0.000110724	0.000116678	0.000112598	0.000111184	0.000116489	0.000105669	0.000113908	0.000112015	0.00010949	0.000104981	0.000118174	0.00011349	0.000110005	0.000113536	0.00011381	0.000110863	0.000116356	6.96415e-05	7.87818e-05
LPC 16:0	0.00139837	0.00127892	0.00133829	0.00144309	0.00142573	0.00108805	0.0012154	0.00118601	0.00125113	0.00143536	0.00128604	0.00136046	0.00135473	0.00129501	0.00126378	0.00116707	0.00102358	0.00125227	0.00116745	0.00129442	0.00156354	0.00122872	0.00128411	0.00199479	0.00125576	0.00120053	0.00114951	0.00121839	0.00132574	0.00114686	0.00117995	0.00115539	0.00114553	0.00114502	0.00104195	0.00134643	0.00129554	0.00120922	0.001314	0.00109878	0.00144811	0.0010287	0.00142052	0.0013135	0.00121003	0.00132127	0.00130342	0.00102249	0.00105024
LPC 16:1	0.000214075	0.000268546	0.000273618	0.000212347	0.000316039	0.000169153	0.000191233	0.00024065	0.000269931	0.000281513	0.00035205	0.000262908	0.000301202	0.000305	0.000348579	0.000175443	0.00019819	0.00018961	0.000236448	0.0001622	0.000121924	0.00015321	0.000170241	0.00035995	0.000314187	0.000390934	0.000300956	0.00027539	0.000314847	0.000237014	0.000264117	0.000315387	0.000353907	0.00028014	0.000322999	0.000323348	0.000327495	0.000250997	0.00027159	0.00024776	0.000222641	0.000261157	0.000250357	0.000239743	0.000203687	0.000199614	0.000137982	0.000433215	0.000428754
LPC 17:0	3.38172e-05	3.09246e-05	3.44194e-05	2.41627e-05	1.83365e-05	1.86988e-05	1.94043e-05	3.91562e-05	2.47443e-05	2.56051e-05	2.23654e-05	2.22466e-05	2.3567e-05	2.27068e-05	2.95e-05	2.18313e-05	2.8471e-05	1.63073e-05	2.13903e-05	1.73473e-05	3.08838e-05	2.57999e-05	3.05375e-05	2.31052e-05	1.97636e-05	2.57904e-05	1.24179e-05	1.44608e-05	1.92565e-05	1.43005e-05	1.73867e-05	1.66138e-05	1.29656e-05	1.53212e-05	1.48937e-05	1.87205e-05	2.64558e-05	1.66445e-05	1.82228e-05	1.38089e-05	2.17314e-05	1.44739e-05	1.64289e-05	1.51611e-05	1.2183e-05	1.49514e-05	1.74177e-05	2.52053e-05	3.06906e-05
LPC 18:0	0.00106013	0.000919528	0.00102454	0.00102023	0.000935427	0.000870305	0.00080863	0.000855394	0.000852373	0.00103144	0.000935935	0.000941703	0.00104471	0.000949854	0.000953293	0.000867822	0.000780147	0.000924356	0.000865897	0.000888587	0.00107868	0.000806784	0.000885499	0.00136204	0.000887	0.00091121	0.000784356	0.000776951	0.000895114	0.000786622	0.000757717	0.000776068	0.000766607	0.000794359	0.000751066	0.000912163	0.00092599	0.000833153	0.00090063	0.000757351	0.00104661	0.000702591	0.000939166	0.000898251	0.000862487	0.000935974	0.000878009	0.000713604	0.00072194
LPC 18:1	0.000870505	0.000774666	0.00085151	0.00093592	0.000826471	0.000762467	0.000777015	0.000797668	0.000754771	0.00088086	0.000809064	0.000821874	0.000831019	0.000801057	0.000756861	0.000718894	0.000639222	0.000722804	0.000747532	0.000800391	0.000865908	0.000773665	0.000774812	0.00110568	0.000691903	0.000748114	0.000643238	0.000691328	0.000799644	0.000699291	0.000693936	0.000698327	0.000675585	0.000678556	0.000629202	0.000771726	0.00079502	0.000713778	0.000766236	0.000566703	0.000830274	0.000588352	0.00075735	0.000796633	0.00074664	0.000738481	0.000749156	0.000348937	0.000355961
LPC 18:2	2.71841e-05	2.73651e-05	3.17342e-05	2.56528e-05	2.50732e-05	3.13628e-05	3.36589e-05	4.6833e-05	6.22626e-05	3.70698e-05	4.35175e-05	3.91465e-05	2.69589e-05	2.98273e-05	3.63575e-05	4.07883e-05	2.82363e-05	3.37203e-05	2.96758e-05	4.60341e-05	5.38436e-05	4.06704e-05	3.86727e-05	3.21398e-05	1.829e-05	3.22434e-05	2.84807e-05	2.15644e-05	2.14435e-05	3.13044e-05	3.74139e-05	2.92332e-05	2.66391e-05	2.4644e-05	2.70531e-05	0.000105805	2.58258e-05	3.52745e-05	2.94838e-05	3.84676e-05	3.21845e-05	3.03163e-05	4.20336e-05	4.47934e-05	3.94771e-05	4.67927e-05	3.37477e-05	2.29187e-05	2.47126e-05
LPC 20:0	0.000118679	6.92578e-05	0.000130383	0.000116271	0.000112743	0.00010452	0.000100394	0.000158709	0.000133304	0.000105406	7.54294e-05	0.000110582	0.0001023	0.000100761	0.000112156	0.000100562	9.71518e-05	0.000105388	8.99011e-05	0.000119097	0.000107803	0.000113731	6.85175e-05	0.000122832	8.50336e-05	4.94322e-05	8.13358e-05	7.68072e-05	9.16781e-05	7.26261e-05	7.62181e-05	7.36527e-05	9.23704e-05	6.97423e-05	8.31009e-05	8.48762e-05	0.000104138	8.08412e-05	8.64324e-05	6.66234e-05	9.73201e-05	7.31866e-05	7.87434e-05	9.46551e-05	8.52939e-05	7.66954e-05	9.08441e-05	4.75458e-05	4.87446e-05
LPC 20:1	0.000179812	0.000126789	0.000138783	0.000189668	0.000174197	0.000120004	0.000120065	0.000219583	0.000184539	0.000155685	0.000143926	0.000141321	0.000136219	0.000133238	0.000139333	0.000142596	0.00011167	0.000135273	0.000120267	0.000195025	0.000167121	0.000146718	0.000143758	0.000187542	0.000123602	0.00012296	0.000104405	0.000119809	0.0001472	0.000115136	0.000137129	0.000104213	0.000126554	0.000101426	0.000114272	0.000124076	0.000113625	0.000141147	0.000130827	0.000110775	0.000171057	0.000100827	0.000129168	0.000144272	0.000201841	0.000146666	0.000118428	6.56829e-05	7.08329e-05
LPC 20:4	4.18487e-05	3.30354e-05	3.70041e-05	4.68744e-05	4.81599e-05	3.63191e-05	4.01575e-05	6.38734e-05	5.80896e-05	4.80628e-05	4.35661e-05	4.16733e-05	4.32198e-05	4.38985e-05	4.66156e-05	3.21797e-05	2.68432e-05	4.12517e-05	3.99623e-05	5.01654e-05	5.48688e-05	4.65259e-05	5.47733e-05	6.92111e-05	3.40487e-05	3.18462e-05	4.52158e-05	4.70357e-05	3.87093e-05	4.2895e-05	5.3729e-05	3.5801e-05	3.88698e-05	4.23268e-05	3.7204e-05	5.01144e-05	3.44627e-05	4.89192e-05	5.12735e-05	4.03024e-05	4.21829e-05	3.01665e-05	5.73244e-05	6.60516e-05	5.92666e-05	6.69419e-05	4.9443e-05	4.47331e-05	5.69494e-05
LPC 21:0	1.23877e-05	1.2196e-05	1.3146e-05	1.40388e-05	1.42307e-05	1.02584e-05	1.12618e-05	1.0758e-05	9.77563e-06	1.47478e-05	1.39281e-05	1.57993e-05	1.27604e-05	1.28142e-05	1.35179e-05	1.28677e-05	7.94811e-06	1.37674e-05	1.33513e-05	1.78049e-05	1.5919e-05	1.28966e-05	1.49122e-05	1.72734e-05	9.25075e-06	1.10905e-05	1.04076e-05	1.08837e-05	1.1321e-05	1.11026e-05	1.19079e-05	1.02336e-05	1.06327e-05	1.10273e-05	1.10913e-05	1.08396e-05	9.71298e-06	1.33911e-05	1.19681e-05	8.23567e-06	1.18564e-05	9.06152e-06	1.25506e-05	1.56065e-05	1.23804e-05	1.40729e-05	1.40702e-05	2.75753e-06	2.36835e-06
LPC 22:0	4.80205e-05	3.45185e-05	3.74779e-05	4.21883e-05	3.93105e-05	3.53998e-05	3.36098e-05	3.54227e-05	3.50377e-05	3.86919e-05	3.707e-05	3.96414e-05	3.77045e-05	3.50997e-05	3.39074e-05	3.40448e-05	3.22764e-05	3.88507e-05	3.95044e-05	4.15447e-05	3.88659e-05	3.49739e-05	3.67849e-05	5.08353e-05	3.40064e-05	3.44841e-05	2.82434e-05	3.04692e-05	3.83572e-05	3.11567e-05	2.99068e-05	3.30935e-05	3.17026e-05	2.96405e-05	3.13123e-05	3.84295e-05	3.98218e-05	3.30292e-05	3.5694e-05	2.75833e-05	3.92983e-05	3.07179e-05	3.31128e-05	3.10373e-05	2.70331e-05	2.94605e-05	3.80924e-05	6.20888e-06	4.62891e-06
LPC 22:1	3.89714e-05	3.81056e-05	4.32647e-05	4.72796e-05	4.4094e-05	3.09826e-05	3.20009e-05	3.49954e-05	3.53932e-05	4.73971e-05	4.25955e-05	5.36107e-05	4.16798e-05	3.95704e-05	4.29686e-05	4.91604e-05	2.73345e-05	4.68749e-05	3.72639e-05	5.31627e-05	4.76475e-05	4.41347e-05	4.38539e-05	6.27466e-05	2.61588e-05	2.79674e-05	3.38723e-05	2.9911e-05	3.13696e-05	3.03476e-05	3.54941e-05	2.92734e-05	2.94844e-05	3.14426e-05	2.82624e-05	3.56753e-05	2.71496e-05	4.10701e-05	4.70187e-05	2.65211e-05	4.16436e-05	2.90568e-05	4.22952e-05	4.65999e-05	4.0731e-05	4.64049e-05	4.25925e-05	4.49467e-06	2.3934e-06
LPC 22:6	7.67274e-05	7.95361e-05	7.84739e-05	8.59451e-05	0.000106099	6.26218e-05	6.65662e-05	0.000110129	0.000109039	8.33037e-05	8.2501e-05	8.06244e-05	7.61145e-05	8.26196e-05	7.96993e-05	6.66003e-05	5.87823e-05	7.97991e-05	7.09486e-05	9.39647e-05	9.43924e-05	8.78322e-05	0.000101452	0.000155448	9.22255e-05	8.13352e-05	0.000102098	0.000108773	9.50636e-05	8.68174e-05	0.000120099	9.72431e-05	0.000102214	8.86742e-05	8.98189e-05	9.62612e-05	8.61567e-05	0.000108551	0.000120126	9.38067e-05	8.89394e-05	8.15605e-05	0.000136035	0.000127524	0.000122976	0.0001606	0.00011519	4.50769e-05	5.0465e-05
LPC 23:0	5.91782e-05	4.72181e-05	5.24906e-05	5.6848e-05	5.78729e-05	4.2188e-05	4.49769e-05	3.96435e-05	3.10347e-05	6.19058e-05	4.91123e-05	7.32653e-05	6.14547e-05	5.61487e-05	5.40927e-05	4.96475e-05	4.21015e-05	5.5038e-05	5.72521e-05	6.71082e-05	6.14969e-05	4.57178e-05	5.67018e-05	8.95635e-05	5.7091e-05	5.21552e-05	5.1583e-05	4.193e-05	5.95434e-05	5.62066e-05	4.22612e-05	5.84732e-05	4.7028e-05	5.24238e-05	4.39488e-05	5.98428e-05	6.23061e-05	6.69863e-05	6.56683e-05	3.77986e-05	6.76303e-05	5.29939e-05	5.83251e-05	5.70377e-05	4.04955e-05	4.76226e-05	6.92824e-05	5.19004e-06	2.51862e-06
LPC 23:1	4.94116e-06	6.03039e-06	5.36394e-06	7.02593e-06	7.04228e-06	4.39784e-06	4.72462e-06	4.86622e-06	5.32211e-06	8.51778e-06	6.14528e-06	8.80486e-06	6.49755e-06	6.43699e-06	7.06873e-06	6.83053e-06	3.87287e-06	6.71627e-06	5.35039e-06	7.69887e-06	7.91761e-06	5.3885e-06	7.28636e-06	9.34774e-06	4.95606e-06	5.02832e-06	5.67966e-06	4.69152e-06	4.55276e-06	6.06309e-06	6.45462e-06	5.39159e-06	5.50177e-06	5.48179e-06	5.91112e-06	5.66455e-06	5.49647e-06	7.60167e-06	8.54133e-06	5.37664e-06	7.43219e-06	5.14825e-06	7.19417e-06	9.18324e-06	6.91263e-06	8.26323e-06	6.66924e-06	8.4122e-07	8.19396e-07
LPC 24:0	0.000515055	0.000456936	0.000489654	0.000544232	0.00048811	0.000407433	0.000443025	0.000258567	0.000243734	0.00054771	0.000446476	0.000563394	0.000495626	0.000459979	0.000466297	0.000430501	0.000382448	0.000527635	0.000498402	0.000544889	0.000553975	0.000481156	0.000508891	0.00072277	0.000466839	0.00044043	0.000401867	0.000368433	0.000573902	0.000477303	0.000427523	0.000483266	0.000406834	0.000381956	0.000413288	0.000526164	0.000569611	0.000513994	0.000581142	0.000308941	0.000582361	0.000476972	0.000556763	0.000414688	0.000367782	0.000455386	0.000623412	2.28666e-05	1.38889e-05
LPC 24:1	3.36122e-05	2.46334e-05	2.90921e-05	2.99337e-05	2.93052e-05	2.4699e-05	2.3458e-05	3.06172e-05	3.1537e-05	2.80286e-05	2.54089e-05	3.58381e-05	2.83971e-05	2.81627e-05	2.9155e-05	4.90908e-05	2.73858e-05	3.02011e-05	2.9084e-05	3.20554e-05	2.93816e-05	2.5992e-05	2.68094e-05	4.10896e-05	2.85419e-05	2.42587e-05	2.24563e-05	2.18371e-05	2.9379e-05	2.1608e-05	2.06459e-05	2.46425e-05	2.66863e-05	2.06885e-05	2.18602e-05	3.62888e-05	3.30114e-05	2.67512e-05	2.86622e-05	2.18169e-05	3.27692e-05	2.504e-05	2.94634e-05	2.77379e-05	2.23928e-05	2.30147e-05	2.95324e-05	3.63938e-06	3.06089e-06
LPC 25:0	5.35628e-05	4.89978e-05	5.23111e-05	5.10377e-05	5.57004e-05	4.03492e-05	4.78644e-05	3.77393e-05	3.81288e-05	5.68455e-05	4.94798e-05	6.96183e-05	5.21676e-05	5.7229e-05	5.02345e-05	4.5284e-05	5.37084e-05	5.50886e-05	4.47674e-05	5.927e-05	6.4927e-05	4.28629e-05	5.64234e-05	8.90416e-05	6.63558e-05	5.43606e-05	5.58541e-05	4.54247e-05	6.8657e-05	5.94173e-05	6.61408e-05	6.7152e-05	5.07026e-05	5.47529e-05	5.46236e-05	6.20039e-05	6.75378e-05	6.16298e-05	7.18466e-05	4.40546e-05	7.29576e-05	6.21711e-05	7.27265e-05	6.05943e-05	5.34233e-05	5.07425e-05	7.11601e-05	1.00738e-05	7.94896e-06
LPC 26:0	0.000101327	9.75403e-05	9.63513e-05	0.00010503	0.000100784	8.53023e-05	7.65072e-05	7.81174e-05	7.48744e-05	0.000101334	8.63834e-05	0.00010446	9.63303e-05	9.28112e-05	8.44165e-05	8.68518e-05	8.32206e-05	9.81851e-05	9.42694e-05	0.000118036	0.000103032	8.49177e-05	9.37787e-05	0.000136596	0.000106468	9.94885e-05	9.64297e-05	8.3657e-05	0.000119439	0.000106403	9.19082e-05	0.000106626	9.14939e-05	8.69827e-05	8.6124e-05	0.000105124	0.000103784	0.000105087	0.000128852	7.71146e-05	0.00010752	0.000105865	9.99335e-05	9.23969e-05	8.95586e-05	6.88199e-05	0.00012419	6.3964e-06	5.40257e-06
LPC 26:1	0.000153674	0.000124236	0.000138927	0.000148231	0.000138188	0.000114405	0.000112548	7.13028e-05	6.86303e-05	0.000142372	0.00012493	0.000147442	0.000143885	0.000134732	0.000119197	0.000124432	0.000103237	0.000147341	0.00013302	0.000157492	0.00013959	0.000140426	0.000130788	0.000173452	0.000108584	9.69357e-05	9.76161e-05	9.81813e-05	0.000128918	0.000115328	0.000101603	0.00010361	0.000100664	0.000102727	0.000100299	0.000120326	0.000111289	0.00011752	0.000139999	7.67007e-05	0.000136495	0.000112741	0.00011478	0.000117676	0.00010439	0.000105108	0.000139083	3.68835e-06	2.47888e-06
[truncated: 487 more rows]
[truncated: 148 more columns]
