# Supplementary material for: A metabolome atlas of mouse brain on the global metabolic signature dynamics following short-term fasting
Source: Signal Transduct Target Ther. 2023 Sep 8;8:334. doi: 10.1038/s41392-023-01552-y (PMC10484938; doi:10.1038/s41392-023-01552-y)
Supplement: Supplementary file 4 — Dataset 3 [file 41392_2023_1552_MOESM4_ESM.xlsx]

## Sheet: SC vs BST
Supplementary Table 7. Comparison of differential lipids in each period of fasting between SC and BST.
FC: fold change, the ratio of metabolite level in each period pf fasting to that of Ctrl.
#DIV/0!: Lipids that could not detected in Ctrl, bot increased after STF.
		Lipid	SC								BST
			F-3h vs. Ctrl		F-6h vs. Ctrl		F-12h vs. Ctrl		F-24h vs. Ctrl		F-3h vs. Ctrl		F-6h vs. Ctrl		F-12h vs. Ctrl		F-24h vs. Ctrl
			FC(F-3h/Ctrl)	p value	FC(F-6h/Ctrl)	p value	FC(F-12h/Ctrl)	p value	FC(F-24h/Ctrl)	p value	FC(F-3h/Ctrl)	p value	FC(F-6h/Ctrl)	p value	FC(F-12h/Ctrl)	p value	FC(F-24h/Ctrl)	p value
BST&SC	↑	CAR 18:2	1.42904	0.0858388	1.70591	0.0174788	2.42601	0.0216371	2.15414	0.00253405	1.0371	0.860554	1.23997	0.260965	1.52806	0.0316816	1.62812	0.016187
		Cer 36:0;2O|Cer 18:0;2O/18:0	1.2774	0.040227	1.37241	0.0375494	1.03533	0.661631	1.12351	0.470519	1.39949	0.0170829	1.22715	0.0306637	1.0449	0.49008	0.966563	0.712391
		Cer 38:1;2O|Cer 18:1;2O/20:0	1.15147	0.224144	1.43371	0.0231045	1.18857	0.0131392	1.04682	0.274184	1.19642	0.0745223	1.20699	0.0121394	1.02817	0.667797	1.10104	0.336697
		DG 40:6|DG 18:0_22:6	1.19239	0.272621	1.33561	0.041419	1.29112	0.0578123	1.21605	0.152757	1.48459	0.0363587	1.1002	0.43355	1.18096	0.349314	1.05224	0.589069
		DG 40:7|DG 18:1_22:6	1.12754	0.268614	1.38102	0.125041	1.24492	0.00987603	1.32648	0.0783062	1.31906	0.174476	1.06751	0.593177	1.24723	0.0292526	1.16919	0.234703
		FA 18:2	1.37459	0.30282	1.30153	0.160159	1.65257	0.00925409	1.82039	0.0417367	1.22029	0.468498	0.918373	0.544037	1.20643	0.212118	1.62629	0.0146872
		LPE 18:2	1.11192	0.444251	1.59321	0.0214844	1.35015	0.0443782	1.4265	0.187381	1.12117	0.539915	0.990995	0.94068	1.34364	0.0329204	1.29045	0.0832542
		PC 34:2|PC 16:0_18:2	1.0942	0.124918	1.13428	0.0772784	1.22779	0.000326369	1.32604	0.00104759	1.1169	0.0715052	1.07755	0.0260877	1.26104	9.46492e-05	1.38516	0.000515047
		PC 34:3	1.41042	0.218428	1.64576	0.0269107	1.86672	0.00723734	1.7041	0.015452	1.3181	0.231683	1.18039	0.141606	1.5214	0.00688167	1.64115	0.0152562
		PC 36:3|PC 18:1_18:2	1.07475	0.039505	1.16318	0.0347488	1.20575	1.38192e-05	1.2201	0.00110823	1.06212	0.0607306	1.05099	0.0941738	1.15596	0.00158911	1.21916	0.00459491
		PC 40:8|PC 18:2_22:6	1.273	0.108584	1.24672	0.012454	1.82775	0.00915332	1.63571	0.00482406	1.27351	0.0916211	1.25909	0.081956	1.56309	0.00728618	1.78822	0.00184798
		PC 41:3	1.09535	0.424409	1.22513	0.181311	1.06149	0.508727	1.11118	0.0226358	1.1478	0.302771	1.22352	0.00634373	1.14833	0.0212986	1.13867	0.207757
		PE 36:3|PE 18:1_18:2	0.981052	0.691779	0.91816	0.0143873	1.00321	0.936007	1.16518	0.00251638	1.05608	0.539154	1.05424	0.565934	1.16323	0.0975655	1.27159	0.0445703
		PE 40:9|PE 18:3_22:6	1.04195	0.565361	0.949569	0.853986	1.2599	0.0315307	1.27915	0.0317655	1.16705	0.033804	1.19246	0.0319101	1.26286	0.0267392	1.35036	0.039382
		PE P-40:8|PE P-18:2_22:6	1.14167	0.424158	1.08173	0.42666	1.09788	0.138483	1.18416	0.0444551	1.0915	0.581835	1.05019	0.521257	1.22732	0.0261495	1.23651	0.0510611
		PS 40:6|PS 18:0_22:6	1.00135	0.967882	0.588183	0.281526	1.13644	0.0209013	0.983157	0.683499	0.987747	0.758419	1.0925	0.0143959	0.98634	0.751988	1.03073	0.579441
	↓	FA 15:0	0.901037	0.313639	0.881986	0.0249884	0.912022	0.192564	0.785321	0.00179865	0.749844	0.0247914	0.856438	0.183871	0.903279	0.262448	0.841579	0.0983415
		LPE 20:1	0.956893	0.607453	1.19966	0.322585	0.968381	0.775339	0.646204	0.00529928	0.884692	0.347374	0.898338	0.426253	0.877214	0.350828	0.638254	0.013592
		LPE 22:4	1.03858	0.745194	1.60743	0.178892	1.08183	0.523688	0.744608	0.0207057	0.894065	0.318285	0.925426	0.41006	0.868537	0.161102	0.693918	0.00617326
		PE 19:1	0.862826	0.35482	0.958358	0.745879	0.983576	0.917227	0.575368	0.0115737	0.802247	0.178594	0.895906	0.510564	0.882973	0.423089	0.607934	0.0281165
		PE 23:4	0.850983	0.375004	1.01856	0.867533	1.02682	0.8577	0.659441	0.0166386	0.755602	0.0463972	0.913372	0.468996	0.856608	0.206462	0.637424	0.012656
		PE 32:2|PE 16:1_16:1	1.00174	0.989331	1.04094	0.748913	0.874779	0.342669	0.793093	0.00702798	0.892265	0.501579	0.714304	0.0179011	0.807384	0.0462784	0.783887	0.0996413
		PE 36:5|PE 16:1_20:4	0.962876	0.729595	1.09254	0.141762	0.844959	0.0384272	0.709514	0.00553285	0.898137	0.430023	0.883662	0.274969	0.780945	0.0591552	0.70634	0.0304851
		PI 36:1	1.00685	0.920966	1.05	0.40643	1.07426	0.216793	0.846139	0.00361924	0.899941	0.144866	1.00573	0.930727	0.957947	0.496795	0.856616	0.0421099
		TG 44:0|TG 14:0_14:0_16:0	1.42678	0.411249	0.360881	0.0059116	0.561447	0.0647458	0.259735	0.00346754	0.402857	0.0605698	0.0820213	0.00695849	0.238598	0.0159864	0.181568	0.0115236
		TG 47:1|TG 15:0_16:0_16:1	1.32237	0.436593	0.425472	0.0309971	0.45366	0.0862305	0.249355	0.00500035	0.68261	0.346192	0.216103	0.00961823	0.328021	0.0157437	0.22769	0.018249
		TG 49:3|TG 15:0_16:1_18:2	2.21863	0.205873	0.157941	0.00259342	0.21742	0.00413843	0.06663	0.000268701	1.32088	0.664901	0.0597555	0.021729	0.125323	0.0295321	0.167681	0.0400292
BST only	↑	CAR 14:0	1.21641	0.151764	1.00306	0.95924	1.36079	0.0639307	1.15512	0.0718915	0.999002	0.993629	0.924342	0.410779	1.26641	0.0381698	1.26206	0.244927
		NAE 13:0	0.793469	0.808686	0.897693	0.912791	2.62665	0.41289	5.51496	0.500854	0.691615	0.454386	1.23635	0.74893	4.51299	0.253674	3.70819	0.0432169
		NAE 16:2	1.07055	0.950418	1.21443	0.852217	3.20777	0.340409	5.49575	0.492772	0.778525	0.441708	1.73878	0.269146	4.74511	0.257186	1.97832	0.0113608
		NAE 20:2	0.805596	0.422857	0.943621	0.805179	0.603828	0.125521	0.664711	0.171377	1.52092	0.0435248	0.980554	0.941314	1.12275	0.695163	1.21594	0.528289
		Cer 40:1;2O|Cer 18:1;2O/22:0	1.15993	0.249236	1.119	0.370092	0.891676	0.360201	1.00371	0.968539	1.42169	0.0092893	1.28511	0.0713716	1.11932	0.353861	1.06497	0.720507
		Cer 45:2;3O|Cer 18:1;2O/27:1;O	1.04993	0.76755	0.950157	0.777573	0.898439	0.593343	1.01395	0.930379	1.42503	0.0035544	1.08565	0.473929	1.31911	0.0784012	1.07951	0.588867
		CL 72:5|CL 18:1_18:1_18:1_18:2	1.05897	0.438163	0.669717	0.360417	1.13422	0.138355	1.14171	0.218858	1.10663	0.290578	1.27009	0.0269418	1.07881	0.437095	1.17816	0.1777
		DG 35:3|DG 17:1_18:2	0.755634	0.814441	1.93675	0.704236	0.442144	0.443518	2.4471	0.506621	#DIV/0!	0.0339064	#DIV/0!	#DIV/0!	#DIV/0!	0.355918	#DIV/0!	0.355918
		PC 35:0	1.01739	0.629623	1.1261	0.130905	0.981107	0.543271	1.02761	0.329985	1.04324	0.202167	1.00032	0.990696	1.08519	0.0087649	1.03346	0.522833
		PC 39:2	1.0725	0.460429	1.07363	0.386471	0.976478	0.607927	1.0284	0.429318	1.07735	0.395074	0.996878	0.90216	1.07764	0.0308957	1.00504	0.93824
		PC 40:2|PC 20:1_20:1	1.02423	0.579135	1.16556	0.261198	1.02021	0.732689	1.02475	0.545294	0.983313	0.720301	0.971495	0.466126	1.08769	0.0402169	1.02633	0.753948
		PC 43:5|PC 23:1_20:4	0.949056	0.646404	1.18155	0.0585006	1.10878	0.313954	0.948649	0.602079	1.06968	0.30019	1.12103	0.0401393	1.05697	0.322501	0.944496	0.262156
		PC 44:7	1.05361	0.747151	1.35824	0.175269	1.25916	0.0788627	1.21951	0.0852541	1.30739	0.0659788	1.30779	0.0255334	1.27895	0.114115	1.23051	0.0270401
		PC O-34:0	1.06974	0.104995	1.03072	0.726731	1.04851	0.170102	0.97337	0.395886	1.07248	0.0494552	1.02076	0.56053	0.961587	0.309769	0.945362	0.310601
		PC O-40:4	2.16097	0.374106	2.13821	0.22823	1.10535	0.144801	1.09011	0.204088	1.03059	0.799518	1.00844	0.859975	1.12331	0.018337	1.03636	0.662097
		PI 40:3	1.22953	0.0624302	1.14811	0.470785	0.867776	0.163459	0.763775	0.0883942	0.904051	0.630685	0.843161	0.383119	0.764036	0.252982	1.50228	0.0372351
	↓	LPE O-26:7	0.98136	0.596756	1.11961	0.374912	0.986909	0.658719	1.02876	0.585272	0.913679	0.036566	0.961091	0.299216	0.928969	0.238967	0.954458	0.289452
		LPC 14:0	0.959518	0.470532	0.992121	0.881494	0.921851	0.141543	0.893858	0.31473	0.928966	0.00559236	0.960905	0.034585	0.927538	0.00556552	0.939249	0.0504438
		LPC 16:1	0.881438	0.504947	1.1347	0.33965	1.20764	0.101771	0.793094	0.0655568	0.798936	0.0401129	0.931484	0.397755	0.85901	0.137996	0.718811	0.00506414
		PC 28:6	0.741434	0.184295	1.14881	0.394873	1.05403	0.785303	0.65852	0.167227	0.743111	0.014079	1.16613	0.120386	0.831289	0.0576871	0.614163	0.00266722
		PC 42:4	1.02242	0.544065	1.20844	0.0816329	1.12626	0.0837782	1.04556	0.389345	0.906738	0.0150994	0.986217	0.673123	1.06887	0.0928436	0.963409	0.519983
		PC 54:8	1.32573	0.446017	1.1003	0.777711	1.70739	0.105007	0.717042	0.362596	0.765173	0.174006	0.605421	0.0170768	0.833627	0.288315	0.563636	0.033169
		PE 21:1	0.840138	0.312577	1.0325	0.821258	1.03991	0.834038	0.672392	0.136721	0.814035	0.184867	0.8972	0.490291	0.907181	0.475303	0.625068	0.0271024
		PE 21:3	0.921656	0.697449	1.25018	0.130985	1.24668	0.136193	0.76151	0.101526	0.841806	0.114014	0.966609	0.732044	0.909075	0.359171	0.725459	0.0315687
		PE P-42:1|PE P-18:1_24:0	1.1044	0.247972	0.735236	0.0662947	0.919702	0.230841	0.996419	0.950611	1.26321	0.163579	0.838396	0.14494	0.794606	0.0483615	0.990687	0.92075
		SM 41:0;3O	1.46428	0.336525	2.15484	0.135346	1.51409	0.13027	1.60546	0.254246	0.899401	0.00665451	0.973889	0.764475	0.908662	0.115526	0.913671	0.354922
		FA 17:0	0.98989	0.943938	1.18066	0.281228	1.1086	0.388943	0.929913	0.581756	0.951301	0.669663	0.988256	0.865913	0.859217	0.0489454	0.907383	0.243865
		FA 17:1	0.921222	0.69825	0.993102	0.946675	1.04367	0.741155	0.848788	0.150348	0.835906	0.126334	0.876555	0.245128	0.84622	0.0611294	0.786248	0.0267841
		FA 18:3	0.929528	0.876046	0.756858	0.472857	1.34923	0.299746	1.32793	0.532496	0.824001	0.456811	0.60536	0.0212066	0.721976	0.075533	0.917605	0.589095
		DG 30:8	0.925304	0.185718	1.03677	0.611539	1.05769	0.650068	1.17472	0.624916	0.886528	0.00776781	0.92612	0.090459	0.997789	0.970691	0.926654	0.182445
		TG 42:0|TG 12:0_14:0_16:0	1.77366	0.331159	0.692865	0.385305	1.36495	0.355562	0.693559	0.389801	0.47821	0.0983936	0.306655	0.0383082	0.344787	0.0282257	0.296839	0.0168296
		TG 50:7|TG 12:0_16:1_22:6	1.27137	0.466652	1.54766	0.482603	1.08394	0.831843	1.31986	0.506359	1.04372	0.916694	0.483992	0.0493128	0.652493	0.0382668	0.786322	0.348024
		TG 60:14|TG 18:3_20:5_22:6	1.57335	0.361664	1.49803	0.512707	0.730709	0.657169	1.00596	0.9934	1.20335	0.556346	0.885993	0.531397	0.404329	0.0137866	1.06704	0.892085
SC only	↑	BMP 42:10|BMP 20:4_22:6	1.16332	0.499347	1.55712	0.0348204	1.55378	0.076915	1.30261	0.444528	0.922763	0.740381	0.923786	0.735186	0.914114	0.70274	0.905258	0.669157
		CAR 16:0	1.14491	0.282759	1.14709	0.134671	1.37749	0.0088051	1.05133	0.577213	1.05583	0.726755	0.950328	0.739767	1.26469	0.101002	1.12874	0.521714
		CAR 16:1	1.23952	0.130765	1.28122	0.0793476	1.42965	0.0091129	1.17019	0.182424	1.05739	0.637207	1.05487	0.683134	1.22617	0.115692	1.06998	0.698498
		CAR 18:1	1.19436	0.239648	1.23924	0.0691958	1.36708	0.0114536	1.0328	0.714446	1.05809	0.696171	0.98867	0.942414	1.22691	0.15846	1.04441	0.822806
		CAR 20:1	1.08252	0.709776	1.41729	0.0700904	1.3902	0.0201574	1.21596	0.277116	0.958581	0.881515	0.881831	0.600799	1.15439	0.51877	1.13565	0.619412
		CAR 20:4	1.2536	0.181628	1.33929	0.0447048	1.28326	0.00355887	0.984159	0.904498	0.989666	0.950155	0.973968	0.847234	1.04387	0.765091	1.01955	0.920468
		CE 20:4	1.78377	0.255903	3.21424	0.221004	1.99285	0.0261566	1.25374	0.708926	0.572675	0.154618	1.13358	0.736922	0.747104	0.401043	0.864297	0.783224
		Cer 36:1;2O|Cer 18:1;2O/18:0	1.21689	0.0172919	1.4059	0.0619806	1.15548	0.00193965	1.16317	0.0579434	1.19001	0.157339	1.18125	0.101108	1.07404	0.496653	1.12856	0.32769
		Cer 36:2;2O|Cer 18:2;2O/18:0	1.31802	0.225316	2.11839	0.0435512	1.71392	0.00109468	1.60028	0.00767375	1.10008	0.764739	1.02918	0.729661	1.07991	0.64963	1.23245	0.190289
		Cer 38:2;2O|Cer 18:2;2O/20:0	1.25309	0.456768	1.74757	0.0523296	1.6	0.00861558	1.34412	0.0966456	1.07411	0.706521	1.21188	0.211075	1.02398	0.891265	1.31346	0.221756
		Cer 40:3;2O|Cer 18:1;2O/22:2	0.967547	0.725076	1.13255	0.683604	1.08546	0.0211081	0.995851	0.97343	0.838913	0.321424	1.12717	0.364161	1.19428	0.39069	1.00567	0.967537
		Cer 41:2;2O|Cer 17:1;2O/24:1	1.39128	0.123106	1.31748	0.0283369	1.23444	0.210802	1.13532	0.499453	1.3126	0.210665	1.07692	0.711736	1.06974	0.715043	0.84875	0.437239
		Cer 43:1;3O|Cer 18:1;2O/25:0;O	1.43423	0.0223566	1.32069	0.0130124	1.014	0.952003	0.873182	0.459834	1.31315	0.296615	1.04113	0.872192	1.17512	0.538339	1.11543	0.690016
		DG 30:0|DG 14:0_16:0	1.44273	0.218906	2.6724	0.0252332	0.863149	0.825933	1.44914	0.295457	1.07033	0.803795	0.471758	0.107303	1.15489	0.614936	1.02926	0.952504
		DG 32:0|DG 16:0_16:0	1.44723	0.219899	1.96898	0.04381	1.40435	0.0358443	1.21243	0.325248	1.05899	0.750125	0.915315	0.492675	1.01465	0.927117	0.944035	0.690284
		DG 33:1|DG 15:0_18:1	1.0054	0.956559	1.27496	0.0641595	1.11258	0.135838	1.1608	0.0186571	1.05792	0.44427	0.906886	0.219915	1.05505	0.410738	0.99884	0.990501
		DG 33:2|DG 15:0_18:2	1.05328	0.657298	1.11956	0.188419	0.987804	0.84691	1.12502	0.0366101	0.983574	0.883136	0.883734	0.309686	1.1634	0.240071	1.00367	0.979799
		DG 34:0|DG 16:0_18:0	1.33944	0.385973	1.97438	0.0133067	1.37988	0.00382563	1.15469	0.499584	1.34769	0.177147	1.08291	0.683402	1.0269	0.903222	0.846549	0.342252
		DG 34:1|DG 16:0_18:1	1.3522	0.136031	2.04021	0.0643199	1.55165	0.00384035	1.57345	0.0648637	1.12903	0.553673	0.881459	0.372622	1.12156	0.373751	1.12308	0.495553
		DG 34:2|DG 16:0_18:2	1.85623	0.120407	2.37296	0.244494	1.86798	0.101927	2.44711	0.00416652	1.48128	0.438551	0.805283	0.310297	1.18875	0.405974	1.39145	0.255272
		DG 35:2|DG 17:0_18:2	1.04389	0.364254	1.31575	0.0093468	1.09129	0.395011	1.22224	0.0362168	1.08371	0.296495	0.944377	0.408886	1.15871	0.113354	1.02148	0.820659
		DG 36:0|DG 16:0_20:0	1.13032	0.656955	1.68565	0.0173471	1.35931	0.0241708	1.15854	0.460292	1.06481	0.750111	0.803208	0.336921	1.07592	0.736536	0.787899	0.297922
		DG 36:1|DG 18:0_18:1	1.35023	0.374782	2.11285	0.044585	1.71874	0.0255045	1.622	0.166	1.34366	0.293661	0.87148	0.564381	1.16024	0.499828	0.963306	0.850222
		DG 36:2|DG 18:1_18:1	1.30232	0.185989	1.95766	0.11993	1.51371	0.0428765	1.7377	0.0442615	1.02885	0.896257	0.824239	0.213106	1.10088	0.209467	1.08044	0.498569
		DG 36:3|DG 18:1_18:2	0.971908	0.59974	1.17111	0.0421232	1.12352	0.252488	1.46312	0.0421125	1.17111	0.238914	0.896109	0.1628	1.13062	0.101084	1.11019	0.40899
		DG 36:4|DG 16:0_20:4	1.0827	0.266404	1.59318	0.154854	1.22728	0.00442338	1.43127	0.0428311	1.1466	0.386863	0.828152	0.141962	1.01144	0.912435	0.961182	0.759037
		DG 37:3|DG 19:1_18:2	#DIV/0!	0.203183	#DIV/0!	0.0530889	#DIV/0!	0.0616079	#DIV/0!	0.0203135	2.77107	0.180661	0.646909	0.703061	2.73229	0.165631	1.54427	0.518292
		DG 37:4|DG 17:0_20:4	1.11052	0.536445	1.50899	0.0569954	1.22377	0.0226342	1.40046	0.101756	1.44074	0.145924	1.00494	0.952894	1.22723	0.1511	1.01986	0.828254
		DG 38:1|DG 18:0_20:1	1.29037	0.386311	1.99112	0.0537348	1.53177	0.036944	1.45914	0.188109	1.21928	0.376331	0.860289	0.447495	1.10676	0.592021	0.943949	0.73693
		DG 38:2|DG 18:1_20:1	1.32754	0.36085	1.94816	0.0562918	1.58664	0.0259881	1.75033	0.152994	1.3294	0.297557	0.793151	0.365893	1.20729	0.401598	0.953231	0.829854
		DG 38:3|DG 20:1_18:2	1.14891	0.563436	1.7879	0.0672414	1.37503	0.00654731	1.37607	0.143934	1.38365	0.0972119	0.966132	0.82526	1.18045	0.251517	1.02999	0.82672
		DG 38:4|DG 18:1_20:3	1.15822	0.448993	1.90781	0.0689166	1.39192	0.00605939	1.43687	0.107038	1.30863	0.192567	0.935719	0.656788	1.08297	0.578635	0.999718	0.998429
		DG 38:5|DG 18:1_20:4	1.07723	0.27389	1.62556	0.117482	1.0996	0.0370671	1.52763	0.0594637	1.304	0.157969	0.960408	0.775534	1.0892	0.527467	1.02594	0.857098
		DG 38:6|DG 16:0_22:6	1.05424	0.587159	1.2407	0.122299	1.09602	0.0329557	1.14296	0.115422	1.20569	0.236783	1.06809	0.421088	1.18098	0.0975448	1.05972	0.565541
		DG 40:4|DG 18:0_22:4	1.17235	0.615354	1.72634	0.0379265	1.38066	0.0444947	1.50683	0.245541	1.29573	0.278621	0.927706	0.736772	1.19006	0.435508	0.9816	0.919889
		DG 40:4|DG 20:0_20:4	1.18921	0.589513	1.74651	0.0371995	1.39834	0.0458363	1.51865	0.236319	1.29645	0.275426	0.931118	0.752592	1.18624	0.446705	0.977118	0.900826
		DG 40:5|DG 18:1_22:4	1.19198	0.463052	1.76143	0.0652206	1.35228	0.0368677	1.45872	0.11555	1.2659	0.198635	0.856055	0.363125	1.14641	0.432087	1.05201	0.721174
		DG 41:1|DG 23:0_18:1	1.36289	0.448688	2.57465	0.0970574	1.93219	0.0176493	1.79865	0.0616249	1.01244	0.954859	0.891856	0.599784	1.20649	0.376979	0.978501	0.926945
		DG 42:1|DG 24:0_18:1	1.29684	0.443877	2.11427	0.0456754	1.57656	0.0432289	1.57758	0.0484039	1.05679	0.778345	0.824946	0.40598	1.15718	0.457513	0.965576	0.880528
		DG O-40:7|DG O-18:1_22:6	1.28769	0.589448	2.01396	0.0309958	1.94518	0.126453	1.57585	0.398485	1.09405	0.795306	0.98109	0.952967	1.38779	0.365067	1.16127	0.65072
		FA 16:0	1.13809	0.386365	1.36815	0.0407512	1.1722	0.12024	1.12311	0.435895	1.0085	0.962937	0.97975	0.869353	0.957176	0.756027	1.05626	0.689435
		FA 18:1	1.46408	0.235657	2.00659	0.0743716	1.6246	0.0322079	1.79509	0.12941	1.18147	0.587096	1.00471	0.982287	1.03113	0.882357	1.22073	0.300425
		FA 20:0	1.17009	0.292981	1.70045	0.0745511	1.29686	0.0319222	1.38755	0.0762945	1.0453	0.830631	1.06758	0.638706	0.941979	0.664008	1.11477	0.426939
		FA 20:1	1.34504	0.274872	1.79206	0.0835854	1.47752	0.0483657	1.72441	0.101355	1.14504	0.622488	1.03871	0.847621	1.06506	0.730788	1.15763	0.374153
		FA 20:2	1.45565	0.162134	1.63254	0.0379625	1.595	0.00734946	1.84215	0.0579172	1.20413	0.439803	1.057	0.771037	1.20234	0.331676	1.40416	0.0768129
		FA 21:0	1.07526	0.48791	1.99955	0.0942395	1.37113	0.0758921	1.3234	0.0237451	0.976258	0.88015	1.11908	0.339025	0.957779	0.713592	1.01667	0.901086
		FA 22:2	1.47139	0.0243547	1.63144	0.0479939	1.50497	0.0186773	1.75958	0.0448301	1.31565	0.265865	1.0712	0.713006	1.1771	0.329708	1.32061	0.0908672
		FA 22:3	1.61408	0.0182323	2.13824	0.148017	1.35969	0.0650208	1.50782	0.0632483	1.18796	0.44431	0.9309	0.650574	0.997953	0.986636	1.10132	0.511109
		FA 22:4	1.46823	0.271587	2.15102	0.109417	1.72161	0.0349205	1.89816	0.155832	1.03093	0.913396	0.950003	0.812724	1.00779	0.972733	1.17668	0.412417
		FA 22:5	1.35408	0.257675	1.68439	0.00934407	1.42048	0.0196885	1.33223	0.247691	1.08073	0.71978	1.0185	0.911803	1.02928	0.867425	1.09239	0.614831
		FA 22:6	1.46005	0.276576	1.84809	0.0217279	1.53942	0.0258766	1.51204	0.194064	1.1021	0.67357	1.03774	0.839468	1.00745	0.969834	1.15466	0.440062
		FA 24:0	1.24342	0.100656	2.51765	0.129158	1.5381	0.0241933	1.80555	0.0318853	1.07408	0.763573	1.13399	0.480425	0.96221	0.78693	1.20104	0.377983
		FA 24:2	1.35464	0.0217317	1.84848	0.129663	1.58217	0.090271	1.74035	0.0596458	0.965576	0.867489	1.06472	0.63491	1.04314	0.738166	1.12517	0.323151
		LPC 18:2	1.00611	0.952356	1.64878	0.0340183	1.14991	0.280439	1.15104	0.275838	1.00515	0.978576	0.967753	0.801902	1.76683	0.311494	1.28652	0.111367
		LPC 20:4	1.14966	0.216043	1.43173	0.040754	1.17578	0.0444537	0.940025	0.643537	1.01135	0.957158	0.855146	0.48004	1.02467	0.909909	0.942626	0.808849
		LPE 22:6	1.33897	0.0506767	2.24197	0.121804	1.27781	0.0180231	1.09883	0.46861	1.26443	0.331934	0.942302	0.696264	1.04992	0.78676	1.03747	0.853207
		MG 22:6	1.21845	0.430687	1.4429	0.00730005	1.16404	0.113202	1.02229	0.916031	0.970889	0.834668	1.22062	0.12427	1.04485	0.706167	0.970478	0.77648
		NAE 20:5	1.37539	0.345206	1.7625	0.0223098	1.49876	0.0201561	1.49821	0.230464	1.1534	0.571165	1.01868	0.926913	1.01419	0.951149	1.13601	0.519718
		PC 36:7	1.23327	0.368524	0.811294	0.281089	1.4564	0.00956572	1.34284	0.291114	1.08584	0.659368	0.856827	0.425088	1.00459	0.981328	0.804864	0.472671
		PC 37:2|PC 19:0_18:2	1.05585	0.58949	1.04448	0.667097	0.928432	0.0916131	1.12685	0.0360423	1.03405	0.715644	0.961769	0.587735	1.06541	0.445369	1.03199	0.785023
		PC 37:4|PC 17:0_20:4	1.03402	0.740479	1.12367	0.0906263	1.13425	0.0404831	1.01093	0.720763	1.05016	0.627748	1.02429	0.609656	1.05441	0.287408	1.03023	0.653325
		PC 38:4|PC 18:0_20:4	1.01371	0.788818	1.19059	0.156963	1.06496	0.0465545	1.04474	0.271936	0.977055	0.768951	1.03253	0.699262	0.992231	0.920734	1.00757	0.925612
		PC 42:10|PC 20:4_22:6	1.03343	0.769863	1.07169	0.318844	1.21323	0.0297971	0.948283	0.477574	0.902551	0.397701	0.927688	0.513604	0.931481	0.554671	0.940757	0.667704
		PC 42:9	1.04404	0.708311	1.14929	0.00418642	1.16918	0.0476986	0.947356	0.412341	0.893412	0.367726	0.917347	0.471841	0.94353	0.632846	0.951486	0.729883
		PC 52:4	1.17997	0.427813	1.15095	0.567145	1.45281	0.0248007	0.999025	0.995227	0.942114	0.597463	1.04488	0.662479	0.923594	0.526542	0.923619	0.629522
		PC 54:7	1.12014	0.521081	1.36165	0.0105609	1.43654	0.0854929	0.922789	0.233703	0.982324	0.915229	0.984711	0.92065	0.933741	0.71196	0.872288	0.47394
		PC 56:10	1.36504	0.425777	1.44058	0.189451	1.76559	0.0458228	0.634374	0.17041	0.923435	0.769044	0.907429	0.738029	1.00713	0.97997	0.885182	0.687839
		PC 56:7	1.1292	0.555844	1.20065	0.00611317	1.27256	0.0719459	0.86496	0.341543	0.976914	0.871655	0.945928	0.707216	0.897666	0.533798	0.895213	0.535831
		PC 56:8	1.00799	0.971797	1.08643	0.397264	1.34651	0.0416549	0.851344	0.0752241	0.909903	0.65076	0.917671	0.685812	0.871904	0.592274	0.894348	0.63111
		PC 60:12|PC 30:6_30:6	1.00265	0.988775	1.18098	0.035248	1.21266	0.210506	0.827607	0.0868704	1.08427	0.637757	0.934334	0.707177	1.06907	0.741248	0.876249	0.547724
		PC 62:12	1.11886	0.650447	1.20088	0.133185	1.57792	0.00794439	0.958805	0.796134	1.25646	0.195126	1.16186	0.350678	1.13133	0.503952	1.01224	0.95507
		PC O-40:7	1.06328	0.475845	1.00668	0.869141	1.11955	0.00886256	1.16872	0.134458	1.04539	0.565128	1.03212	0.614977	1.02492	0.721326	0.98157	0.775522
		PE 40:6|PE 18:0_22:6	1.02088	0.803611	1.05469	0.00807148	1.03267	0.237559	0.91321	0.107478	0.974315	0.770662	1.00237	0.978612	0.947378	0.581496	0.94229	0.567809
		PG 40:7|PG 18:1_22:6	1.06251	0.705056	1.11679	0.372028	1.3077	0.0458617	0.864981	0.384885	0.986568	0.953006	1.03571	0.868615	0.930424	0.76409	0.935664	0.777278
		PG 40:8|PG 18:2_22:6	1.20331	0.318638	1.20924	0.167433	1.49033	0.014234	1.209	0.328891	1.01795	0.928728	1.14813	0.480334	1.18714	0.358433	1.27769	0.255378
		PG 42:9|PG 20:3_22:6	1.00684	0.972964	1.01682	0.900826	1.1775	0.00274704	0.841723	0.200212	0.829196	0.290984	0.948741	0.751678	0.879948	0.456114	0.857607	0.43122
		PI 32:0	1.09848	0.506218	1.15139	0.382087	1.6588	0.0457334	1.22297	0.254084	1.18299	0.370957	1.07408	0.589911	1.30767	0.0711704	1.27732	0.235523
		PS 32:1|PS 16:0_16:1	1.03824	0.899661	2.49117	0.145109	1.3834	0.00453286	1.09586	0.417259	0.589097	0.0626638	0.801791	0.373833	0.810643	0.440362	0.769888	0.246527
		PS 42:10|PS 20:4_22:6	1.03077	0.829036	0.65832	0.476193	1.30486	0.0305607	1.0139	0.899767	0.936298	0.56454	1.02507	0.829645	0.99648	0.978228	1.05779	0.691061
		SM 34:2;2O|SM 18:2;2O/16:0	0.980497	0.807572	1.03498	0.902512	1.08698	0.0367298	1.00238	0.983389	0.8671	0.0973138	0.955394	0.594352	0.903187	0.202501	0.919739	0.650976
		SM 40:0;3O	1.24205	0.173674	1.01492	0.963616	1.43429	0.002104	1.40962	0.0786749	0.976135	0.892757	0.937809	0.596142	0.742911	0.0676462	0.98286	0.943979
		SM 42:1;2O	1.10287	0.504064	0.808742	0.68621	1.25707	0.0334049	1.28891	0.179875	1.1505	0.501641	0.902923	0.426234	0.78467	0.0514313	0.949452	0.830463
		SM 42:1;3O	1.13091	0.378449	1.05477	0.796931	1.12392	0.0136327	1.20866	0.0713058	1.03225	0.679726	1.05817	0.458772	1.00969	0.914247	1.10363	0.299406
		TG 62:5|TG 26:1_18:2_18:2	4.62374	0.0115615	1.39584	0.441197	2.5253	0.299088	2.2986	0.258577	0.84911	0.797612	0.4547	0.330251	0.429684	0.313338	0.390999	0.284303
	↓	CE 18:2	0.662273	0.0908824	0.820702	0.537804	0.624497	0.0478097	0.599197	0.0730041	1.06309	0.857569	0.725296	0.417747	0.965442	0.938928	1.17786	0.607445
		Cer 30:1;2O|Cer 18:1;2O/12:0	0.865912	0.296705	1.2728	0.313331	0.861804	0.184099	0.69341	0.0300846	0.887172	0.291184	0.852031	0.118245	0.925826	0.395487	0.80423	0.061071
		CL 78:14|CL 16:1_18:1_22:6_22:6	0.978997	0.742342	0.596473	0.304912	1.02225	0.501644	0.884459	0.0416933	0.980805	0.870945	1.09663	0.263373	0.974173	0.791689	1.00396	0.965662
		CL 82:17|CL 18:1_20:4_22:6_22:6	0.931372	0.270232	0.527618	0.178753	0.933914	0.111297	0.747918	0.0276005	0.967029	0.617426	1.06135	0.386555	0.95177	0.506692	0.948889	0.540024
		DG 51:6	0.78769	0.14739	0.365831	0.00861546	0.601679	0.0325792	0.365765	0.00679168	0.527824	0.16074	0.459415	0.123588	0.584145	0.211772	0.330772	0.0643166
		DG 52:1	1.12525	0.374445	0.98629	0.921335	1.01513	0.749116	0.740572	0.00346876	0.956154	0.824529	0.892683	0.599713	0.882405	0.595199	0.786106	0.352673
		DG 52:2	1.23213	0.135582	1.00675	0.956656	1.05636	0.57046	0.726169	0.0113612	1.13347	0.60149	0.845995	0.548704	0.910921	0.751863	0.873891	0.690943
		FA 9:0	0.973554	0.838795	0.905467	0.183406	0.916561	0.208812	0.787019	0.0129123	1.01818	0.825138	1.06147	0.554867	1.1367	0.122953	1.05988	0.585404
		LPC 16:0	0.966038	0.684338	0.96347	0.509194	0.985032	0.638181	0.861088	0.0320343	0.869718	0.403814	0.801325	0.216031	0.922257	0.608577	0.892067	0.529983
		LPC 17:0	0.609631	0.000910232	0.84613	0.316989	0.741372	0.0113887	0.665582	0.0158548	0.806694	0.257507	0.737498	0.12545	0.987253	0.945578	0.819505	0.323866
		LPC 18:0	0.907379	0.208158	0.917503	0.234931	0.971032	0.551669	0.858355	0.036019	0.815392	0.216902	0.782866	0.146946	0.905523	0.500259	0.873526	0.440615
		LPC 18:1	0.991879	0.90267	0.974002	0.607414	0.964524	0.389542	0.849664	0.0197783	0.904439	0.507969	0.840929	0.276836	0.955416	0.749734	0.860061	0.399945
		LPE 20:0	0.9573	0.38593	1.17966	0.235969	0.985169	0.81662	0.78658	0.00918965	0.911901	0.362045	0.885145	0.223467	0.912583	0.338672	0.805626	0.0757123
		NAE 17:2	0.713951	0.0705784	0.904124	0.666024	0.517449	0.0142353	0.552336	0.0180803	1.44131	0.127272	1.25577	0.390363	1.40096	0.183244	0.869459	0.44022
		NAE 22:5	0.796776	0.248638	1.0092	0.965322	0.598963	0.0245562	0.576345	0.0650214	1.3544	0.0719687	1.04707	0.839503	1.00874	0.967863	1.19975	0.377612
		PC 33:0|PC 16:0_17:0	1.04159	0.615219	1.08168	0.390869	0.942654	0.0236111	1.03373	0.416412	1.06694	0.468131	0.990202	0.905039	1.06321	0.519807	1.01134	0.901904
		PC 38:5	0.986418	0.642806	1.06563	0.110942	1.03052	0.132988	0.924679	0.0259636	1.00449	0.8594	1.02915	0.288181	0.975987	0.369953	0.935897	0.0805102
		PC 50:6	0.894668	0.480012	0.906158	0.628877	1.09274	0.431309	0.687503	0.00387965	1.2245	0.39723	1.10167	0.672124	1.01176	0.963083	1.14269	0.62859
		PC 58:12	1.02487	0.837418	1.15476	0.136309	1.20011	0.140758	0.778028	0.0271532	1.09438	0.585769	1.03823	0.793279	1.07306	0.661444	1.05745	0.708155
		PC O-29:1	0.941072	0.5234	0.708486	0.171953	0.87881	0.0278159	0.883144	0.231931	0.99004	0.892032	0.905304	0.197612	0.981853	0.792793	0.907471	0.371985
		PC O-38:3	0.974905	0.771305	1.00545	0.950471	0.879811	0.00068338	0.94256	0.0542112	1.04721	0.628107	0.983067	0.795757	1.05397	0.455861	0.975762	0.80016
		PC O-39:8	0.828288	0.140886	0.89055	0.0933173	0.887686	0.0212187	1.04093	0.635766	0.877293	0.458614	1.06583	0.67239	0.967251	0.833102	0.956059	0.784643
		PC O-41:10	0.916808	0.388622	1.07629	0.775507	0.762218	0.0170743	0.979476	0.864426	0.936523	0.731455	1.03882	0.858589	0.939912	0.740774	1.02726	0.883228
		PE 32:1|PE 16:0_16:1	0.944736	0.533617	0.933897	0.050819	0.84726	0.019636	0.894259	0.0538116	0.994125	0.947747	0.880623	0.153978	0.932114	0.376137	0.928911	0.393873
		PE 34:1|PE 16:0_18:1	0.975545	0.673961	0.943026	0.172931	0.928671	0.0249332	0.864926	0.00812837	0.966113	0.542087	0.959568	0.46409	0.928713	0.229798	0.876485	0.0734667
		PE 34:2|PE 16:0_18:2	0.993007	0.927874	0.96606	0.181698	0.878726	0.0171391	0.910018	0.0186405	1.04542	0.678729	0.968609	0.571786	0.957333	0.420522	0.924637	0.208154
		PE 36:0|PE 18:0_18:0	0.963083	0.674604	0.916115	0.014852	0.939362	0.122663	1.0476	0.491201	1.01003	0.936082	1.02259	0.855936	1.0023	0.986362	1.04271	0.750434
		PE 36:2|PE 18:1_18:1	0.997854	0.983944	0.963587	0.437267	0.892812	0.0402602	1.07399	0.263653	1.02293	0.840175	0.990239	0.932506	1.00894	0.940804	1.01736	0.902412
		PE 37:4|PE 17:0_20:4	0.991357	0.934795	1.03955	0.315985	1.00185	0.965745	0.86852	0.0303997	0.959623	0.714301	0.929304	0.452511	0.929854	0.4529	0.916155	0.399604
		PE 38:1|PE 18:0_20:1	0.969757	0.549982	0.92959	0.0406204	0.941751	0.110793	1.10479	0.0365633	1.00513	0.94953	0.972184	0.714133	1.024	0.795317	1.02811	0.747398
		PE 38:2|PE 18:1_20:1	0.974784	0.819331	0.857736	0.0040244	0.852188	0.0517867	1.0851	0.118325	1.05003	0.611087	1.00395	0.96868	1.05641	0.59014	1.03337	0.788281
		PE 38:5|PE 18:1_20:4	0.96046	0.0351479	0.998969	0.98103	0.930657	0.0544221	0.959464	0.10595	1.01009	0.783907	1.01312	0.590667	1.01113	0.75208	0.983207	0.615562
		PE 39:6|PE 17:0_22:6	1.07068	0.461161	1.08391	0.387183	1.01558	0.428417	0.956129	0.04768	1.15993	0.174254	1.10848	0.0643952	1.0321	0.579929	1.03853	0.523612
		PE 40:2|PE 20:1_20:1	0.974135	0.626032	0.864253	0.0340029	0.890386	0.0377276	1.08677	0.016152	1.04778	0.493063	0.980296	0.752448	1.07041	0.265599	1.04935	0.618167
		PE 40:3|PE 18:0_22:3	0.98275	0.857425	0.970943	0.510872	0.906799	0.025743	1.07028	0.198214	0.959103	0.678739	0.983808	0.874925	0.992862	0.948403	1.01913	0.858524
		PE 42:9;2O|PE 22:6_20:3;2O	1.00403	0.942314	1.39409	0.196559	1.00033	0.991194	0.900757	0.011765	0.992343	0.893692	1.0049	0.941671	0.975826	0.694058	0.945447	0.419704
		PE 46:12	0.946659	0.540152	0.910321	0.0689733	0.895519	0.0129677	0.901648	0.138639	0.956621	0.704818	0.967306	0.721973	0.999786	0.998567	0.924265	0.395012
		PE O-37:6|PE O-17:2_20:4	1.01168	0.921093	1.10267	0.323138	1.0077	0.888251	0.848867	0.0336321	0.900738	0.550988	0.887374	0.485065	0.865334	0.409394	0.823667	0.299968
		PE O-39:5|PE O-17:1_22:4	0.958422	0.591372	0.921399	0.0293598	0.975474	0.375952	0.882077	0.0230298	0.907056	0.272099	0.923598	0.384606	0.966667	0.684229	0.90718	0.317501
		PE O-39:5|PE O-19:1_20:4	0.958465	0.591511	0.921399	0.0293598	0.975474	0.375952	0.882077	0.0230298	0.907096	0.27233	0.923598	0.384606	0.966667	0.684229	0.90718	0.317501
		PE P-35:1|PE P-17:0_18:1	1.00027	0.998646	0.821285	0.00483776	0.889459	0.0523827	0.982923	0.801283	1.09904	0.50309	0.954636	0.689865	1.09241	0.445574	1.03183	0.797177
		PE P-36:1|PE P-18:0_18:1	0.970747	0.701811	0.950436	0.0115133	0.945573	0.129512	1.08054	0.232167	1.03346	0.716002	0.999645	0.996928	1.0528	0.604742	1.02679	0.785199
		PE P-36:6|PE P-14:0_22:6	0.809631	0.111395	0.824088	0.310745	0.827421	0.145773	0.714155	0.0359202	0.848089	0.141566	0.87805	0.225721	0.979494	0.815957	1.06154	0.775286
		PE P-37:1|PE P-17:0_20:1	1.00256	0.983641	0.797113	0.0236888	0.936267	0.0062204	1.03108	0.464403	1.1115	0.376363	0.956585	0.511397	1.10283	0.16109	1.04158	0.71214
		PE P-37:2|PE P-18:1_19:1	0.973962	0.845235	0.804963	0.00216008	0.86619	0.0279635	0.94891	0.37847	1.0723	0.634369	0.918299	0.45995	1.06636	0.557717	0.98647	0.918299
		PE P-38:2|PE P-18:1_20:1	0.946394	0.435845	0.943915	0.223058	0.916735	0.0386656	1.02201	0.641706	0.982146	0.85499	0.962961	0.709701	1.02059	0.839197	0.9908	0.934586
		PE P-38:6|PE P-16:0_22:6	0.983344	0.583399	1.04616	0.283987	1.01732	0.550454	0.944862	0.012697	1.0347	0.429485	1.03706	0.277482	1.03069	0.262401	0.999188	0.979128
		PE P-39:2|PE P-18:1_21:1	0.977638	0.858168	0.755838	0.00335083	0.912085	0.00740798	0.964703	0.217464	1.06892	0.638716	0.920328	0.293524	1.04986	0.50385	0.977159	0.844471
		PE P-40:7|PE P-18:1_22:6	0.986015	0.631753	1.06671	0.196765	1.01438	0.37702	0.961845	0.0215266	1.02991	0.670821	1.00761	0.908347	1.0392	0.584854	1.00832	0.900072
		PE P-42:4|PE P-18:0_24:4	0.93419	0.00765839	0.942673	0.346852	0.986497	0.729269	0.991512	0.793901	0.953421	0.390309	0.962173	0.300702	1.04069	0.30163	0.997434	0.966175
		PE P-42:6|PE P-18:0_24:6	0.902366	0.0135754	0.982595	0.825835	0.954857	0.375053	0.945571	0.452263	1.0123	0.886546	1.03683	0.707111	1.04348	0.616027	1.01787	0.838681
		PE P-42:6|PE P-20:0_22:6	0.905036	0.0150948	0.984895	0.848841	0.957281	0.397142	0.946973	0.46088	1.01175	0.89116	1.03514	0.716831	1.04267	0.621159	1.0179	0.837683
		PG 36:4|PG 16:0_20:4	1.09931	0.372898	0.882327	0.515992	1.1426	0.0689667	0.872675	0.0493046	0.925477	0.60732	1.05816	0.698652	0.93639	0.683366	0.85584	0.393207
		PI 36:4|PI 16:0_20:4	0.905875	0.0701155	0.605469	0.209572	0.969275	0.456781	0.859909	0.0228081	0.992462	0.904382	1.11707	0.0807253	1.00212	0.973173	0.958715	0.536762
		PI 38:3	0.886913	0.0240152	0.740597	0.111036	0.923309	0.1172	0.923557	0.175215	0.97421	0.59958	1.04452	0.294842	0.976659	0.682348	0.951302	0.38508
		PI 38:5|PI 18:1_20:4	0.946565	0.131766	0.613046	0.220764	1.00806	0.730025	0.877053	0.0282735	0.983062	0.659003	1.07584	0.0927839	0.99948	0.989843	0.955134	0.38219
		PS 35:1|PS 17:0_18:1	0.817106	0.0308881	0.696998	0.095528	0.876046	0.302536	0.89506	0.181184	0.95576	0.655917	0.951595	0.313722	1.06282	0.361158	0.98536	0.451756
		PS 38:2|PS 18:1_20:1	0.863788	0.50748	0.465715	0.0483628	0.809502	0.0794747	1.20191	0.354711	1.00958	0.967046	1.07362	0.737435	1.06515	0.796906	1.13977	0.564529
		PS 41:6|PS 19:0_22:6	0.864454	0.036112	0.616874	0.283441	1.12569	0.193056	0.955354	0.452789	0.888961	0.260023	1.07677	0.318706	0.96951	0.637219	1.01025	0.895817
		SM 31:1;2O	0.98662	0.92943	0.877018	0.521947	1.0404	0.696053	0.77711	0.0246504	0.885272	0.455263	0.906275	0.452964	1.01646	0.898283	0.901266	0.589287
		SM 36:2;2O|SM 18:1;2O/18:1	0.892602	0.261875	1.05219	0.109984	1.04058	0.228836	0.845057	0.00275368	0.833655	0.230563	0.925505	0.41405	0.912112	0.375896	0.872733	0.181634
		SM 36:3;2O	0.889069	0.212763	0.885155	0.203331	0.928692	0.184493	0.800369	0.0101951	0.852505	0.211864	0.831098	0.164213	0.938045	0.577628	0.829017	0.168004
		SM 40:2;2O|SM 18:1;2O/22:1	1.01423	0.926848	0.84751	0.0121487	0.801422	0.0227015	1.06398	0.480295	1.16662	0.336908	1.17841	0.371796	0.97869	0.892187	1.08226	0.61336
		SM 41:2;2O|SM 18:1;2O/23:1	1.06884	0.618779	0.868455	0.0880724	0.895029	0.00588936	0.964296	0.0580407	1.15206	0.153828	1.02865	0.489184	0.987378	0.770644	0.974571	0.611419
		SM 41:2;2O|SM 18:2;2O/23:0	1.07161	0.605038	0.868877	0.101016	0.896001	0.00786951	0.963296	0.0747082	1.15506	0.146862	1.02991	0.474618	0.986716	0.758804	0.974997	0.615346
		TG 38:1|TG 8:0_12:0_18:1	0.88143	0.761229	0.267746	0.0380287	0.218785	0.0255654	0.0913452	0.0130832	0.455875	0.214346	0.210208	0.0897676	0.160025	0.0749504	0.135859	0.0681841
		TG 40:2|TG 8:0_14:0_18:2	0.850039	0.785806	0.101286	0.0437215	0.158163	0.0536378	0.0501953	0.0363824	0.355629	0.182344	0.157181	0.0816464	0.105106	0.0679374	0.12946	0.0741596
		TG 42:2|TG 8:0_16:0_18:2	0.780885	0.586638	0.422351	0.12883	0.314929	0.0481187	0.229575	0.0358473	0.348397	0.242865	0.246358	0.179519	0.24064	0.180436	0.393843	0.269324
		TG 44:2|TG 10:0_16:0_18:2	1.18684	0.701545	0.404834	0.017136	0.40291	0.018255	0.0558544	0.000449085	0.472405	0.408661	0.120193	0.173051	0.255864	0.240922	0.198878	0.208275
		TG 46:1|TG 14:0_16:0_16:1	1.28365	0.553809	0.35197	0.0383392	0.42862	0.0754319	0.209453	0.0186424	0.440962	0.220965	0.127403	0.0680734	0.135039	0.06888	0.110119	0.0631954
		TG 46:2|TG 12:0_16:0_18:2	1.39433	0.471267	0.282388	0.0214063	0.396062	0.0599894	0.143722	0.00898158	0.224927	0.325164	0.0200192	0.220719	0.0425044	0.230294	0.0237323	0.222282
		TG 46:3|TG 12:0_16:1_18:2	2.09481	0.311816	0.132685	0.00798719	0.32344	0.0312181	0.0928028	0.00671164	0.371156	0.382572	0.03108	0.179307	0.0240587	0.176451	0.0641461	0.192283
		TG 47:2|TG 13:0_16:0_18:2	1.08885	0.903548	0.46686	0.118802	0.403151	0.0599789	0.310756	0.0169918	0.239008	0.302677	0.246374	0.311477	0.201683	0.28207	0.0612371	0.21206
		TG 48:1|TG 14:0_16:0_18:1	1.22038	0.582724	0.360054	0.0214367	0.427455	0.0362065	0.224212	0.00920567	0.506771	0.244754	0.219518	0.0777178	0.208958	0.073773	0.193941	0.0704997
		TG 48:2|TG 14:0_16:0_18:2	1.29149	0.519067	0.31835	0.0176536	0.399949	0.0394015	0.206935	0.00919784	0.571985	0.326363	0.143345	0.0585731	0.173924	0.0650649	0.154307	0.0611481
		TG 48:3|TG 14:0_16:1_18:2	1.24331	0.576731	0.312948	0.0114046	0.382493	0.0270537	0.176189	0.00471368	0.658235	0.478759	0.0866013	0.0519239	0.0923883	0.05226	0.0831315	0.0507718
		TG 49:2|TG 15:0_16:0_18:2	1.37046	0.435603	0.232116	0.00302359	0.436832	0.0182214	0.230651	0.00204561	0.869645	0.82961	0.104328	0.119432	0.113367	0.120565	0.0827122	0.110573
		TG 50:1|TG 16:0_16:0_18:1	1.08779	0.780908	0.485701	0.0241359	0.580173	0.0408282	0.351074	0.00765121	0.676392	0.294752	0.392299	0.0666017	0.401068	0.0699763	0.361343	0.0594124
		TG 50:2|TG 16:0_16:1_18:1	1.17249	0.688623	0.305058	0.0163406	0.413118	0.0268912	0.232877	0.00947685	0.653117	0.431174	0.164318	0.0661117	0.216134	0.0797381	0.222758	0.08384
		TG 50:3|TG 16:0_16:1_18:2	1.3306	0.516509	0.323195	0.0118958	0.413447	0.0196561	0.238908	0.00614578	0.776128	0.628902	0.132009	0.0557626	0.203062	0.0721705	0.189656	0.0702068
		TG 50:4|TG 16:1_16:1_18:2	1.20368	0.645755	0.314597	0.00104207	0.397335	0.00177126	0.257962	0.000387982	0.875264	0.818533	0.100439	0.0738341	0.245881	0.118606	0.176872	0.0959942
		TG 51:1|TG 16:0_17:0_18:1	1.01502	0.951715	0.525861	0.0354351	0.659401	0.088786	0.421214	0.00942006	0.802274	0.462837	0.446308	0.0505397	0.484926	0.0673518	0.447223	0.0600531
		TG 51:2|TG 16:0_17:1_18:1	1.14243	0.680943	0.327241	0.0114041	0.52277	0.02042	0.292549	0.00424958	0.828228	0.687561	0.180205	0.0544896	0.255665	0.0739703	0.309401	0.0976609
		TG 51:3|TG 15:0_18:1_18:2	1.16047	0.751148	0.282325	0.0129614	0.400252	0.015495	0.230912	0.00620893	0.911981	0.897567	0.0696744	0.141491	0.207384	0.199702	0.24429	0.223539
		TG 51:4|TG 15:0_18:2_18:2	0.984765	0.982476	0.120361	0.0333646	0.274025	0.0726198	0.111573	0.0318933	0.928529	0.939333	0.0593954	0.26569	0.0703245	0.271256	0.162295	0.318578
		TG 52:1|TG 16:0_18:0_18:1	0.985738	0.949269	0.64731	0.031904	0.717665	0.0432617	0.490264	0.00380794	0.806428	0.352875	0.631103	0.101676	0.613863	0.0941754	0.555118	0.068862
		TG 52:2|TG 16:0_18:1_18:1	1.08734	0.818903	0.446992	0.0453702	0.573992	0.0794821	0.353071	0.0206752	0.767642	0.518174	0.322499	0.0706669	0.374958	0.0894696	0.389125	0.101786
		TG 52:3|TG 16:0_18:1_18:2	1.15495	0.74647	0.34463	0.0291598	0.494503	0.050994	0.31501	0.0190259	0.91345	0.864525	0.161139	0.0776595	0.287739	0.120699	0.314466	0.140142
		TG 52:4|TG 16:0_18:2_18:2	1.14248	0.786389	0.309059	0.0156958	0.432139	0.0281042	0.300857	0.0123654	1.02897	0.965552	0.137545	0.132324	0.28554	0.199533	0.258887	0.188773
		TG 52:5|TG 16:1_18:2_18:2	1.14368	0.774104	0.434057	0.0128085	0.496888	0.0189525	0.353917	0.00514172	1.05333	0.943751	0.14043	0.184981	0.371	0.315436	0.235004	0.234287
		TG 52:6|TG 16:1_18:2_18:3	0.988228	0.958855	0.668178	0.00187576	0.678278	0.00129262	0.460438	0.000188587	0.103562	0.368503	0.0603368	0.347359	0.0676687	0.350874	0.0586562	0.346582
		TG 53:2|TG 16:0_18:1_19:1	0.976848	0.939997	0.46371	0.0303689	0.645397	0.11562	0.351964	0.0122725	0.948887	0.893575	0.310316	0.0851242	0.382352	0.115016	0.426395	0.154494
		TG 53:3|TG 17:0_18:1_18:2	1.13537	0.767114	0.295727	0.0351985	0.497133	0.0862776	0.307605	0.0302815	0.859212	0.792555	0.0964197	0.0923897	0.217515	0.134397	0.327546	0.204017
		TG 53:4|TG 17:1_18:1_18:2	1.04668	0.928618	0.207966	0.0168263	0.321414	0.0239548	0.228445	0.016009	0.933786	0.92738	0.0679844	0.18528	0.118893	0.206908	0.17593	0.238641
		TG 53:7|TG 15:0_18:2_20:5	0.902275	0.515866	1.20664	0.0201415	1.04529	0.499022	0.75969	0.00641874	0.962958	0.757946	1.0333	0.744802	1.07132	0.601825	0.91647	0.518964
		TG 54:1|TG 16:0_18:0_20:1	0.945706	0.733428	0.771177	0.0625613	0.780799	0.0306662	0.619515	0.003728	0.855986	0.37224	0.763967	0.157476	0.771231	0.178387	0.676923	0.0830908
		TG 54:2|TG 18:0_18:1_18:1	0.977213	0.935796	0.584885	0.0823582	0.660576	0.122554	0.466253	0.0297491	0.832816	0.466827	0.560035	0.0805123	0.552306	0.0799678	0.561965	0.0976289
		TG 54:5|TG 18:1_18:2_18:2	1.03604	0.933213	0.349538	0.0241121	0.434245	0.0243487	0.364892	0.0140218	0.907553	0.87284	0.194224	0.159703	0.277862	0.200356	0.391962	0.280227
		TG 54:6|TG 18:1_18:2_18:3	1.03643	0.881998	0.654681	0.00923995	0.771188	0.0410435	0.541679	0.00164655	0.959225	0.900207	0.613996	0.219571	0.635572	0.255692	0.587523	0.208031
		TG 55:3|TG 18:1_18:1_19:1	0.851115	0.723169	0.279064	0.0311254	0.48658	0.109908	0.239087	0.0194515	0.734344	0.600982	0.110113	0.0948393	0.127406	0.100147	0.342827	0.205508
		TG 56:1|TG 16:0_22:0_18:1	0.962589	0.780586	0.847501	0.236589	0.850958	0.013229	0.747551	0.00608138	0.921957	0.67926	0.81068	0.323501	0.85253	0.467106	0.754655	0.22713
		TG 56:10|TG 18:2_18:3_20:5	0.895831	0.688335	0.350483	0.0465932	0.764849	0.412815	0.466466	0.00622319	1.08179	0.911695	0.664927	0.451971	0.775381	0.608139	0.461324	0.228863
		TG 56:2|TG 18:0_18:1_20:1	1.05249	0.74965	0.801072	0.093817	0.821636	0.0683996	0.658964	0.00548964	0.92881	0.692409	0.733286	0.167372	0.751999	0.229084	0.705293	0.150353
		TG 56:4|TG 18:1_20:1_18:2	1.00531	0.984481	0.636675	0.0431432	0.78252	0.177879	0.539528	0.0106106	0.86975	0.652859	0.625108	0.214843	0.612033	0.211566	0.679771	0.315711
		TG 56:5|TG 18:1_18:2_20:2	1.06588	0.740385	0.802202	0.0794619	0.892243	0.352116	0.641548	0.00368407	0.939234	0.803495	0.749875	0.329905	0.735792	0.315135	0.733794	0.33314
		TG 56:6|TG 16:0_18:1_22:5	1.06935	0.675266	0.876734	0.0825042	0.936003	0.409257	0.710767	0.00204962	0.976256	0.903066	0.796922	0.310507	0.800568	0.374647	0.738555	0.224326
		TG 56:8|TG 16:0_18:2_22:6	1.51051	0.189322	0.954107	0.630751	1.32519	0.0285669	1.06826	0.600161	1.89589	0.36892	0.839194	0.60588	1.13679	0.676645	1.12761	0.726578
		TG 57:1|TG 16:0_23:0_18:1	0.616029	0.025979	0.627046	0.00294344	0.631115	0.0148524	0.473096	0.00184951	0.754948	0.205433	0.863506	0.524235	0.832393	0.433587	0.584471	0.112904
		TG 58:1|TG 16:0_24:0_18:1	0.881866	0.378634	0.836819	0.248317	0.808026	0.0352381	0.685119	0.0136325	0.862638	0.454641	0.753517	0.190805	0.850538	0.416667	0.727104	0.177667
		TG 58:10|TG 18:2_18:2_22:6	1.09732	0.587127	1.10566	0.446848	1.03359	0.62596	0.781985	0.0312497	1.09314	0.696099	0.730394	0.162361	0.929657	0.72237	0.889996	0.608447
		TG 58:2|TG 16:0_18:1_24:1	0.963501	0.789214	0.819668	0.11204	0.795384	0.0133473	0.666761	0.00703443	0.975679	0.905727	0.809722	0.345556	0.846172	0.435508	0.729169	0.253714
		TG 58:2|TG 22:0_18:1_18:1	0.941365	0.707098	0.809635	0.163107	0.774641	0.0645766	0.705958	0.0242858	0.967158	0.860165	0.876167	0.450434	0.827777	0.352688	0.714434	0.145571
		TG 58:3|TG 18:1_18:1_22:1	1.0981	0.624425	0.764288	0.154831	0.794226	0.147874	0.655076	0.0363797	0.962317	0.834512	0.78998	0.300029	0.757485	0.30966	0.681331	0.183089
		TG 58:3|TG 22:0_18:1_18:2	1.04197	0.820423	0.819732	0.259236	0.797193	0.0993052	0.631383	0.0201117	1.0249	0.920978	0.655446	0.194711	0.747591	0.360277	0.656082	0.223562
		TG 58:5|TG 18:0_18:1_22:4	1.08443	0.681525	0.853832	0.0613495	0.986962	0.907264	0.635592	0.000716119	0.869667	0.598366	0.757013	0.366875	0.719252	0.330558	0.692272	0.289686
		TG 58:6|TG 18:1_18:1_22:4	1.07998	0.578067	0.896555	0.287764	0.959288	0.706146	0.726255	0.00617197	0.916982	0.707509	0.756124	0.308754	0.805603	0.452283	0.770225	0.384221
		TG 59:3|TG 23:0_18:1_18:2	0.864574	0.781396	0.321444	0.00505887	0.69889	0.230159	0.400721	0.0202921	1.6342	0.12558	0.743538	0.473694	0.424864	0.0979509	0.549088	0.221252
		TG 60:12|TG 16:0_22:6_22:6	1.06796	0.580283	0.951502	0.604251	0.972401	0.76755	0.756723	0.013327	0.990383	0.960352	0.830811	0.2784	0.882976	0.573945	0.813712	0.295474
		TG 60:2|TG 24:0_18:1_18:1	0.893455	0.665843	0.765737	0.249067	0.774791	0.183084	0.609812	0.0389408	1.05065	0.845156	0.933887	0.763046	0.771371	0.334473	0.615026	0.134671
		TG 60:3|TG 24:0_18:1_18:2	1.05351	0.789011	0.83541	0.362533	0.761912	0.141411	0.626234	0.0444293	1.29767	0.336925	0.801403	0.508731	0.741899	0.402236	0.641689	0.270205
		TG 62:2|TG 26:0_18:1_18:1	0.816475	0.491545	0.677683	0.183427	0.619439	0.0571394	0.510934	0.0250245	0.981936	0.95763	0.859553	0.62935	0.71951	0.326765	0.610701	0.22664
		TG 62:3|TG 18:1_18:1_26:1	1.10335	0.694782	1.09002	0.625477	0.648406	0.0497998	0.736899	0.128589	1.18083	0.612504	0.603488	0.365309	0.700383	0.496746	0.516749	0.255072
		TG 62:3|TG 26:0_18:1_18:2	0.98046	0.93729	0.783297	0.318786	0.678055	0.0652983	0.553242	0.0207609	0.939809	0.818541	0.516115	0.133129	0.722626	0.293543	0.494144	0.0855814

## Sheet: COR vs HIP
Supplementary Table 8. Comparison of differential lipids in each period of fasting between COR and HIP.
FC: fold change, the ratio of metabolite level in each period pf fasting to that of Ctrl.
		Lipid	COR								HIP
			F-3h vs. Ctrl		F-6h vs. Ctrl		F-12h vs. Ctrl		F-24h vs. Ctrl		F-3h vs. Ctrl		F-6h vs. Ctrl		F-12h vs. Ctrl		F-24h vs. Ctrl
			FC(F-3h/Ctrl)	p value	FC(F-6h/Ctrl)	p value	FC(F-12h/Ctrl)	p value	FC(F-24h/Ctrl)	p value	FC(F-3h/Ctrl)	p value	FC(F-6h/Ctrl)	p value	FC(F-12h/Ctrl)	p value	FC(F-24h/Ctrl)	p value
COR&HIP	↑	CAR 16:0	2.70616	0.0219509	1.75772	0.00980213	2.35079	0.00252494	2.51285	0.000339183	1.45254	0.0756011	1.49766	0.0479555	1.64237	0.051644	1.2418	0.258242
		CAR 16:1	2.3148	0.0410357	1.49544	0.0733497	1.66586	0.0209084	1.64408	0.0234404	1.42243	0.0412678	1.57354	0.0248241	1.4788	0.106621	0.976005	0.880185
		CAR 18:1	2.70268	0.0319834	1.66459	0.0205913	2.16827	0.00825719	2.50451	0.000101775	1.54031	0.0627591	1.56545	0.0472927	1.6015	0.0815673	1.19593	0.372435
		CAR 18:2	2.48609	0.0677678	1.7092	0.00571908	3.38314	0.000723586	4.33999	0.000208768	1.656	0.0270488	1.43429	0.0430238	2.13512	0.00300134	2.32215	0.0407987
		CAR 20:1	2.32492	0.0275874	2.00959	0.000384826	3.34687	0.0132127	5.17535	0.000691169	1.37243	0.274634	1.29172	0.323029	2.14906	0.0835119	1.76856	0.0363217
		Cer 30:1;2O|Cer 18:1;2O/12:0	0.55236	0.0158794	1.12468	0.533362	1.052	0.703776	0.579435	0.0144043	0.862543	0.497788	1.90077	0.00150746	0.968442	0.883503	0.835026	0.375191
		DG O-40:7|DG O-18:1_22:6	1.1023	0.554521	1.45122	0.0290344	1.51154	0.116893	1.70937	0.0824524	1.23037	0.450129	1.19912	0.333288	2.13557	0.0772151	1.76379	0.00892496
		FA 16:0	1.15582	0.242385	1.33432	0.0135034	0.933373	0.371763	1.03541	0.859933	1.107	0.465513	1.0938	0.372852	1.4142	0.021182	1.19311	0.0746462
		FA 16:1	1.45904	0.134793	1.51668	0.0147901	0.982659	0.865378	1.37174	0.213735	1.19567	0.414785	1.04842	0.75973	1.708	0.0338946	1.43201	0.0477194
		FA 18:1	1.36852	0.159776	1.49022	0.0315614	0.967735	0.819394	1.28024	0.423655	1.16312	0.4874	1.1487	0.4292	1.65984	0.0495117	1.3887	0.0770624
		FA 18:2	1.51892	0.0472659	1.41349	0.030286	1.33459	0.0785995	1.87274	0.0300011	1.45955	0.0781282	1.22103	0.0865134	2.60521	0.00529821	2.52131	0.00187335
		FA 20:0	1.04469	0.641297	1.4792	0.00811797	1.01098	0.867017	1.23459	0.315672	1.122	0.570183	1.11132	0.493594	1.56387	0.0177059	1.12571	0.43706
		FA 20:1	1.43346	0.0826509	1.72617	0.00936183	1.0544	0.645972	1.39376	0.351214	1.33944	0.341388	1.3333	0.257258	1.9069	0.0478968	1.42068	0.157525
		FA 20:2	1.41759	0.119619	1.5637	0.0213153	1.06535	0.613939	1.43586	0.206275	1.20505	0.324244	1.22959	0.199453	1.84196	0.0275085	1.58323	0.00959139
		FA 20:5	0.971847	0.751584	1.03939	0.521916	0.835274	0.0297318	0.837582	0.138109	1.08066	0.38444	1.12586	0.0265649	1.55958	0.101249	1.23482	0.0644756
		FA 22:0	1.06766	0.672086	2.38979	0.0382631	0.958335	0.806236	1.3137	0.312387	1.15119	0.699862	1.29094	0.373055	1.88491	0.0394626	1.37806	0.243452
		FA 22:1	1.40936	0.139353	1.90924	0.0148871	1.37108	0.0170028	1.90685	0.0511764	1.31298	0.437	1.39431	0.217265	1.93181	0.0476338	1.25305	0.409017
		FA 22:2	1.39063	0.0670243	1.96597	0.0212138	1.04065	0.709976	1.7243	0.0608903	1.54642	0.167083	1.66332	0.069116	2.10646	0.0277906	1.60718	0.073148
		FA 22:3	1.55556	0.0395595	2.02761	0.101029	0.940387	0.623912	1.32215	0.350536	1.40431	0.102905	1.7819	0.0146099	1.75169	0.0649286	1.38242	0.117746
		FA 23:1	1.21568	0.384829	2.17309	0.0227381	1.22027	0.123493	1.44078	0.347661	1.22808	0.626784	1.43728	0.226697	1.95831	0.0358081	1.36254	0.282046
		FA 24:0	0.899901	0.563047	1.80565	0.0404605	1.26297	0.332294	1.64704	0.0566823	1.23898	0.488532	1.49956	0.0924689	1.7731	0.0347931	1.69245	0.043622
		FA 26:1	1.47189	0.336815	2.80573	0.0125863	1.50058	0.151843	2.26058	0.111191	1.50842	0.436507	1.72657	0.176044	2.70463	0.0142875	1.98299	0.0820819
		LPE 20:2	1.08984	0.500629	1.35924	0.0301725	1.05602	0.737165	1.13191	0.419665	1.12254	0.431985	2.07784	0.00482262	1.31002	0.252818	1.13736	0.497758
		LPE 22:1	1.36507	0.234103	2.37902	0.0217656	1.12694	0.293258	1.48929	0.231808	1.1962	0.47392	2.08091	0.010852	1.2561	0.329243	0.8107	0.36373
		LPE 22:4	1.16409	0.145605	1.29878	0.128262	0.988387	0.907959	0.781133	0.016582	1.00908	0.933593	1.5635	0.00317929	1.22148	0.506819	0.720998	0.0306254
		LPE 22:5	1.82304	0.0937321	1.77508	0.162569	0.73564	0.0568073	0.684119	0.0253076	1.19068	0.407333	2.23602	0.000147194	0.845268	0.398969	0.711847	0.0148565
		NAE 17:2	1.35262	0.0365191	1.37985	0.325827	1.46153	0.0271241	1.49896	0.0210291	1.4662	0.163494	2.12272	0.00618051	1.86006	0.0154618	1.66592	0.0174582
		NAE 20:0	1.27847	0.0259217	1.25196	0.366449	1.29301	0.236555	1.52857	0.0328786	1.06083	0.27187	1.30546	0.129201	1.36289	0.00318346	1.39634	0.27252
		NAE 21:1	1.53917	0.0167317	1.27537	0.283989	1.15801	0.41073	1.27561	0.140753	1.08156	0.259895	1.25073	0.0161222	1.15933	0.166388	0.905301	0.134783
		NAE 6:0	1.40138	0.264634	1.8178	0.247184	1.31083	0.109667	2.10003	0.00404855	1.25882	0.525966	3.12125	0.00136403	2.38644	0.0442395	2.33625	0.00971332
		PC 33:1	1.27807	0.204831	1.19184	0.0229319	1.04248	0.0494933	1.07609	0.000397741	1.31277	0.109995	1.23108	0.0280039	1.10671	0.212331	1.0063	0.943695
		PC 33:2|PC 15:0_18:2	1.67038	0.123522	1.42218	0.105008	1.81887	0.000739308	2.35966	0.000171979	1.53762	0.129529	1.36904	0.218246	1.67433	0.0164982	1.98682	0.0125855
		PC 34:2|PC 16:0_18:2	1.09209	0.298798	1.18911	0.0528232	1.29243	0.0152719	1.49758	0.00277155	1.11611	0.0513461	1.21731	0.00576879	1.27548	0.00191959	1.38623	0.00041875
		PC 34:3	1.47296	0.0178786	1.39738	0.0215067	1.49408	0.00342941	1.64529	2.67449e-05	1.25265	0.0699506	1.50632	0.0039901	1.55287	0.00318556	1.46998	0.0269797
		PC 35:2	1.24222	0.19716	1.21833	0.00688777	1.09317	0.153085	1.20183	0.00817345	1.19688	0.0430063	1.24984	0.0806519	1.14627	0.133658	1.14011	0.116605
		PC 37:2|PC 19:0_18:2	1.15699	0.183522	1.13465	0.0380819	1.10797	0.053017	1.07905	0.225265	1.47373	0.0214589	1.53744	0.116569	1.20313	0.0858615	1.19637	0.149927
		PC 37:4|PC 17:0_20:4	1.2182	0.36556	1.20757	0.0418992	1.0031	0.92253	1.06049	0.153722	1.21146	0.41675	1.18687	0.0224108	1.01961	0.718691	0.992011	0.897455
		PC 40:8|PC 18:2_22:6	1.35814	0.0202844	1.2835	0.0685577	1.41805	0.0132382	1.62051	0.00021378	1.07675	0.516632	1.35204	0.0178466	1.50045	0.0192094	1.41302	0.0178209
		PC 42:5	1.07944	0.127526	1.14174	0.0401843	1.10542	0.0548125	1.04487	0.216755	1.11894	0.353529	1.35313	0.0352107	1.11766	0.239582	0.983827	0.864498
		PE 35:1|PE 17:0_18:1	1.277	0.057254	1.2404	0.155921	1.298	0.0156951	1.33596	0.0181189	1.37141	0.00714576	1.39639	0.0214111	1.12573	0.249474	1.18504	0.098345
		PE 37:2|PE 18:1_19:1	1.59541	0.0257771	1.45383	0.0448571	1.01943	0.879182	1.00463	0.978288	1.35762	0.183682	1.78378	0.032126	1.29286	0.295868	1.09095	0.684788
		PE 40:9|PE 18:3_22:6	1.39241	0.0606673	1.22693	0.0919623	1.29047	0.0693642	1.49651	0.00106528	1.12903	0.305898	0.890589	0.416056	1.38852	0.00407638	1.27723	0.0862512
		PE P-33:1|PE P-16:0_17:1	3.39359	0.0300302	2.2176	0.101836	1.89234	0.0178411	1.59884	0.279982	2.31455	0.00189018	1.76149	0.0760117	1.3148	0.151144	1.55073	0.0703062
		PI 37:4	1.18306	0.384275	1.46332	0.0279925	1.0525	0.588968	1.30361	0.130679	1.03831	0.90058	1.65077	0.0160862	1.35637	0.0711239	1.12377	0.655428
		HexCer 44:2;3O|HexCer 18:1;2O/26:1;O	1.68312	0.164091	0.993672	0.935341	2.34094	0.000117053	1.94891	0.00308655	1.13631	0.469863	1.77353	0.230745	0.749213	0.0202508	0.939651	0.462262
	↓	LPG 22:6	1.22448	0.28046	0.952311	0.82489	0.961834	0.78285	0.62248	0.0424738	0.762929	0.288522	1.07386	0.744253	0.69057	0.302222	0.530189	0.0452925
		PC O-30:1	1.14399	0.403089	1.27553	0.0359172	1.02354	0.807395	1.00746	0.911836	1.22934	0.0418929	1.13304	0.121718	0.909476	0.282587	0.950222	0.251444
		PE 36:5|PE 16:1_20:4	1.11708	0.400317	1.18194	0.454578	0.740386	0.0212623	0.662731	0.0089415	0.914296	0.431607	1.12256	0.163843	0.765945	0.00308773	0.651141	0.000370682
		PE 36:6|PE 14:0_22:6	1.30008	0.162221	1.43436	0.222408	0.834729	0.172487	0.738935	0.0421405	0.95847	0.728193	1.50486	0.0158024	1.03562	0.784741	0.697543	0.0331074
		PE 38:7|PE 16:1_22:6	1.18919	0.177486	1.17671	0.339472	0.884339	0.199558	0.810282	0.0432931	0.984338	0.878622	1.07718	0.47359	0.98107	0.773432	0.841171	0.0276843
		PE P-38:6|PE P-16:0_22:6	1.0206	0.705466	1.09019	0.0447281	1.00704	0.858366	0.994166	0.877458	0.974224	0.463729	1.03392	0.391002	0.916631	0.0296202	0.952297	0.0367735
		LPC 16:1	0.873916	0.2778	0.926041	0.507308	1.02648	0.768727	0.763327	0.0291169	0.76109	0.0679992	0.567477	0.00151796	1.15254	0.659742	0.668468	0.0217111
		PE 42:9;2O|PE 22:6_20:3;2O	0.960078	0.26188	1.11662	0.324903	0.946883	0.0882544	0.885389	0.00333261	0.96613	0.585601	1.26717	0.0146746	0.923616	0.0920915	0.979816	0.668131
		DG 50:0	0.927377	0.660598	0.53914	0.00413082	0.811962	0.294106	0.612324	0.0277457	0.731307	0.00266586	0.74288	0.00343104	0.445162	0.000204826	0.33597	7.57742e-06
		DG 51:6	0.880246	0.344917	0.829984	0.266786	0.698554	0.0580301	0.446842	0.00458289	0.784357	0.161127	0.960379	0.7882	0.575971	0.0610573	0.504519	0.0211877
		DG 52:0	0.924201	0.814591	0.44458	0.0416766	0.944655	0.856054	0.694178	0.232462	0.747286	0.0945278	0.648088	0.0151511	0.457418	0.00293385	0.283486	0.000786756
		PS 32:1|PS 16:0_16:1	0.913783	0.693532	0.705666	0.324676	0.765365	0.022027	0.925905	0.531184	0.817989	0.528409	0.285794	0.000279304	0.666461	0.0159657	0.771638	0.0308755
		PS 36:2|PS 18:1_18:1	0.957589	0.699562	0.667763	0.156951	1.1406	0.0405826	1.18231	0.01671	1.01648	0.860534	0.310701	0.00378862	1.09281	0.442546	1.08746	0.378457
		PS 40:6|PS 18:0_22:6	0.857761	0.0662248	0.533936	0.112072	1.04127	0.154561	1.05556	0.0235032	0.892059	0.131368	0.221308	0.00356416	0.923893	0.248988	0.957125	0.500955
		SM 40:1;2O	0.788508	0.151531	0.677283	0.00757827	0.966079	0.694487	1.01755	0.850659	0.724186	0.0764507	0.472553	0.00330524	0.914151	0.594556	0.666261	0.0450127
		SM 41:1;2O	0.868557	0.262198	0.732189	0.0168724	1.09306	0.392744	1.0635	0.412169	0.842658	0.254165	0.531194	0.00170045	0.842194	0.0530033	0.690137	0.000877207
		SM 42:1;2O	0.847812	0.175174	0.712621	0.00758797	0.860276	0.121618	0.901727	0.246199	0.807977	0.229086	0.565066	0.0176677	0.876813	0.312644	0.742094	0.0533342
		TG 50:1|TG 16:0_16:0_18:1	0.968665	0.885575	0.729423	0.28545	0.503003	0.0702037	0.378513	0.0246927	0.956467	0.862834	0.822533	0.385712	0.84074	0.610889	0.444199	0.0379501
		TG 52:1|TG 16:0_18:0_18:1	0.964739	0.861063	0.767682	0.347742	0.571901	0.104729	0.444642	0.0285102	0.930714	0.635049	0.985309	0.920784	0.728735	0.152247	0.452418	0.00583203
		TG 54:6|TG 18:1_18:2_18:3	1.03687	0.876194	0.803934	0.476188	0.592191	0.138006	0.466669	0.048419	0.847984	0.315422	0.918696	0.585158	0.807659	0.362963	0.529547	0.0262972
		TG 58:12|TG 18:2_18:4_22:6	1.78494	0.215376	1.55229	0.325288	0.730353	0.485463	0.38514	0.0402244	0.828765	0.352328	1.42755	0.156641	0.917956	0.547993	0.660358	0.0357459
COR only	↑	CAR 14:0	1.8665	0.104595	1.78415	0.075075	1.72154	0.0911265	2.11182	0.0238392	1.33101	0.181612	1.40862	0.0618724	1.49534	0.0752642	1.24812	0.215713
		CAR 20:4	1.82533	0.135346	1.32466	0.198591	1.53309	0.074778	1.43875	0.0211522	1.23509	0.278408	1.04972	0.757526	1.14509	0.380985	0.846526	0.309322
		CE 18:1	1.17317	0.848753	4.46463	0.1552	2.10837	0.0153027	1.83803	0.374794	0.952548	0.95497	1.60164	0.325589	2.73115	0.069597	2.11141	0.0560858
		Cer 36:2;2O|Cer 18:2;2O/18:0	0.809986	0.0845718	1.39401	0.000979186	0.974391	0.744813	1.14938	0.333732	0.994087	0.984066	1.14178	0.495167	1.30232	0.187982	1.56094	0.0909236
		Cer 38:2;2O|Cer 18:2;2O/20:0	0.963519	0.837601	1.3668	0.0166717	1.03514	0.749351	1.13917	0.447032	0.984048	0.941294	1.24712	0.222736	1.39021	0.0830773	1.25438	0.196352
		Cer 40:2;2O|Cer 18:2;2O/22:0	0.803863	0.351052	0.822798	0.0571013	1.74626	0.00386578	1.63663	0.0450309	0.973105	0.94321	1.00926	0.981128	1.21155	0.533238	1.06923	0.850882
		Cer 41:2;2O|Cer 17:1;2O/24:1	0.833333	0.209938	1.056	0.658166	1.71728	0.00466388	1.4257	0.00606519	1.05202	0.816931	1.08505	0.711438	1.30163	0.176823	0.913748	0.564441
		Cer 42:2;2O|Cer 18:1;2O/24:1	1.23288	0.221313	1.51441	0.028533	1.00769	0.945484	1.19433	0.520013	1.23857	0.366873	1.33406	0.192826	1.59031	0.0919247	1.2031	0.389635
		Cer 43:1;3O|Cer 18:1;2O/25:0;O	0.9058	0.826686	0.53359	0.296327	4.42869	0.0124603	1.8136	0.152966	0.601202	0.518308	1.02649	0.968964	0.752362	0.671681	0.542697	0.444612
		Cer 43:2;3O|Cer 18:1;2O/25:1;O	1.13277	0.704213	0.920139	0.277029	1.50262	0.157748	1.67562	0.0462666	1.00255	0.984649	1.19817	0.496278	0.699612	0.134713	0.811593	0.29296
		DG 33:2|DG 15:0_18:2	5.20748	0.0342262	0	0.149634	0	0.149634	0.822705	0.827313	3.12008	0.204615	3.43564	0.0930803	1.78616	0.190283	1.62806	0.264138
		DG 38:2|DG 18:1_20:1	1.86281	0.201399	1.79729	0.0356856	1.24815	0.524664	1.1633	0.640974	1.5405	0.395562	1.94147	0.0819919	1.63422	0.257893	1.06239	0.86196
		DG 38:6|DG 16:0_22:6	1.31559	0.0271229	1.32916	0.0193657	1.21828	0.144091	1.05765	0.583638	1.05751	0.492016	1.18187	0.166642	1.05962	0.622821	1.08004	0.456004
		DG 40:7|DG 18:1_22:6	1.6744	0.127159	1.4385	0.0245503	1.36832	0.0139224	1.01425	0.952151	1.16499	0.605506	1.32127	0.330753	1.32404	0.292071	1.28368	0.367775
		FA 12:0	0.916315	0.543071	1.25823	0.0432041	0.853624	0.20831	1.28028	0.0721304	1.09896	0.221638	1.30756	0.0558861	1.34348	0.0643751	1.43447	0.0682863
		FA 13:0	1.07817	0.368025	1.22876	0.142428	0.95851	0.482672	1.27389	0.0141623	0.882386	0.476328	1.0377	0.84233	1.13745	0.531389	1.05023	0.81188
		FA 15:4	1.23037	0.0172306	1.22138	0.187711	0.88932	0.170645	0.955463	0.71231	1.06068	0.630897	1.1065	0.420439	1.13069	0.262786	0.956524	0.723919
		FA 17:1	1.18034	0.105328	1.24717	0.0056634	1.06389	0.269937	1.22074	0.200435	1.02398	0.871151	0.863487	0.158207	1.46037	0.0647097	1.07299	0.684173
		FA 18:1;O	0.91168	0.169319	1.38909	0.0128827	0.862625	0.147183	1.00829	0.864025	0.75083	0.184105	1.01794	0.927932	1.21604	0.542501	0.905073	0.630778
		FA 22:4	1.36086	0.169109	1.53727	0.0339788	0.983156	0.903822	1.32334	0.417024	1.15964	0.542363	1.16959	0.434938	1.84664	0.0552039	1.45576	0.0815692
		FA 22:5	1.41281	0.156821	1.53207	0.0167375	0.964674	0.716666	1.11367	0.641322	1.23765	0.330318	1.27544	0.0879113	1.52344	0.0555946	1.25048	0.0945225
		FA 22:6	1.39335	0.12374	1.59513	0.0203872	0.929691	0.508082	1.0932	0.751757	1.1827	0.461748	1.33402	0.0829054	1.52901	0.0705106	1.24389	0.138407
		FA 24:2	1.06987	0.703612	1.84363	0.0237999	0.848775	0.530283	1.23729	0.442192	1.21482	0.526384	1.35674	0.198927	1.64414	0.0686252	1.31757	0.198629
		FA 24:3	1.22114	0.12979	1.30159	0.0326447	1.04448	0.632121	1.07603	0.6879	0.832191	0.643533	0.864674	0.696188	1.21658	0.556744	0.829035	0.617643
		FA 24:6	1.08678	0.454434	1.2166	0.0354197	0.946137	0.361815	1.00153	0.991661	1.05226	0.681344	1.01676	0.889286	1.26986	0.066999	1.06798	0.518473
		HexCer 36:1;3O|HexCer 18:1;2O/18:0;O	1.39844	0.469059	1.34807	0.017547	1.14905	0.340472	1.4342	0.140585	1.24826	0.539429	1.4299	0.248503	1.07381	0.722634	0.924373	0.716833
		HexCer 36:2;3O|HexCer 18:2;2O/18:0;O	1.34693	0.20282	1.33779	0.05601	1.17209	0.106487	1.43014	0.00450065	1.37466	0.251552	1.36402	0.280982	1.0471	0.838191	0.93113	0.764004
		LPC 18:2	1.127	0.431148	1.68618	0.145414	1.02842	0.708019	1.69845	0.00684031	0.785873	0.259509	1.33525	0.191913	0.983684	0.946603	1.04051	0.817324
		LPC 26:1	2.36842	0.365379	1.99641	0.0330516	1.13292	0.619619	1.16171	0.687611	1.693	0.274246	1.20043	0.552952	1.28039	0.443126	1.13821	0.637811
		LPE 20:1	1.16863	0.329474	1.33814	0.0163677	1.14657	0.202189	0.767795	0.141257	1.04385	0.796708	1.13743	0.502926	1.28963	0.428638	0.698738	0.06104
		LPE O-16:2	1.50355	0.0299023	1.13321	0.243979	1.25785	0.135184	1.19037	0.142372	1.12953	0.414622	0.975101	0.874191	1.12878	0.507369	0.890377	0.509782
		MG 16:0	1.74525	0.119298	1.97056	0.0119156	0.930519	0.635386	1.43891	0.478797	0.802347	0.654325	0.872315	0.753223	1.17547	0.71301	0.740337	0.522116
		MG 18:1	1.68462	0.0833857	1.57619	0.0347124	0.916168	0.556856	1.30944	0.443691	1.08458	0.735805	1.16426	0.445819	1.735	0.103561	1.00737	0.972356
		NAE 17:1	1.70279	0.0672495	2.12448	0.184113	1.35319	0.0427482	1.09893	0.433596	0.118554	0.376806	0.225207	0.433667	0.140132	0.387897	0.121015	0.378147
		NAE 19:0	1.6252	0.0254663	1.11631	0.668355	1.21788	0.374128	1.43023	0.0967492	0.878921	0.769996	0.930246	0.864986	0.895594	0.801574	0.786436	0.61159
		NAE 20:2	1.8075	0.124777	1.20082	0.61048	2.61167	0.0151691	2.96783	0.00361342	1.57462	0.172484	1.62	0.253146	1.64956	0.213821	1.41362	0.262763
		NAE 20:5	1.52435	0.10073	1.61898	0.0140564	0.998925	0.992342	1.21792	0.529978	1.14584	0.556722	1.23959	0.198375	1.56919	0.0838123	1.23212	0.155437
		NAE 22:5	1.91217	0.0583084	1.45419	0.260422	2.22473	0.0158815	2.41301	0.00927603	1.6693	0.0991181	1.77848	0.177137	1.62106	0.135877	1.56832	0.175479
		PC 30:0|PC 14:0_16:0	1.07333	0.0262768	1.13717	0.1365	1.00057	0.979378	1.01585	0.464353	1.06009	0.368351	1.10782	0.0921838	0.980817	0.787543	0.960537	0.487502
		PC 30:2|PC 12:0_18:2	2.01713	0.0465253	2.10201	0.150782	1.12923	0.765181	1.77746	0.0959783	1.12949	0.659492	1.71256	0.0765471	1.21421	0.426274	1.09863	0.668648
		PC 32:2|PC 16:1_16:1	1.43557	0.0598272	1.2372	0.134005	1.11632	0.25218	1.2465	0.0110411	1.11368	0.263564	1.22068	0.0524499	1.11818	0.264793	1.01837	0.853219
		PC 38:2|PC 18:1_20:1	1.11802	0.277144	1.16978	0.00105543	1.06298	0.0145099	1.06909	0.155704	1.30524	0.0941309	1.38839	0.0701817	1.09334	0.244086	1.0986	0.323731
		PC 39:6	1.21737	0.225844	1.18032	0.00605993	1.05006	0.307995	1.01416	0.663766	1.27321	0.269399	1.1621	0.0890007	1.13951	0.143404	0.994713	0.939504
		PC 40:7	1.06443	0.0360405	1.157	0.0634369	1.04364	0.00138617	1.05187	0.00574107	0.967019	0.594868	1.09127	0.191227	1.04651	0.410342	0.986782	0.820987
		PC 41:6	1.082	0.0228072	0.978031	0.884918	1.12681	0.144464	0.946572	0.504094	1.28024	0.209417	1.49079	0.273158	1.42007	0.152275	1.29	0.191565
		PC 41:7	1.29376	0.108374	1.1739	0.0292934	1.08689	0.291312	1.27708	0.000604866	1.25656	0.126848	1.01526	0.921426	1.25688	0.289436	1.04166	0.774741
		PC 42:7-1	0.944364	0.490628	1.1707	0.046842	1.0394	0.531986	1.04107	0.626316	1.04069	0.351827	1.16516	0.0656855	1.0869	0.292885	1.00837	0.823368
		PC 46:4|PC 26:0_20:4	2.85978	0.047025	5.12366	0.00220979	3.05614	0.0804299	4.43569	0.0185661	1.58766	0.256642	1.71778	0.116658	1.22427	0.395978	0.848041	0.533561
		PC O-30:0	1.01472	0.828677	1.17765	0.0329931	0.988215	0.800171	0.952039	0.339334	1.21262	0.102725	1.18253	0.169087	1.02336	0.84758	1.00556	0.956778
		PC O-36:3	1.20651	0.137419	1.33677	0.00335245	1.03053	0.54971	1.12096	0.251604	1.42465	0.0657584	1.39357	0.152828	1.0737	0.614971	1.08228	0.62166
		PC O-40:4	1.07112	0.25735	0.938174	0.329126	1.46737	0.000426397	1.28071	0.143921	0.960968	0.686529	1.14842	0.225263	0.984577	0.870725	0.856861	0.132967
		PC O-41:1	9.0897	0.0700387	4.23536	0.120267	5.23266	0.0151036	3.27823	0.345349	1.38652	0.422417	2.01501	0.0718208	1.31466	0.342438	0.97603	0.928901
		PE 21:1	1.09313	0.706431	1.68311	0.011317	1.21688	0.237139	0.875745	0.658837	1.00997	0.951348	0.846995	0.407682	1.61211	0.256273	0.64819	0.050469
		PE 34:3|PE 16:1_18:2	1.41347	0.163106	1.37107	0.129213	1.14531	0.395358	1.35074	0.0295344	1.02461	0.885788	1.12578	0.628865	0.965422	0.841575	0.961518	0.830366
		PE 41:1|PE 23:0_18:1	1.64674	0.210246	1.29029	0.423804	2.24012	0.0548608	2.30854	0.0128187	1.14085	0.11907	1.46615	0.0592276	1.01351	0.895056	1.05172	0.398274
		PE 42:7|PE 20:1_22:6	1.03502	0.861088	0.827507	0.0915153	1.30725	0.0207704	1.3541	0.00183139	0.892955	0.595523	0.67185	0.134552	0.930116	0.740396	1.04734	0.838598
		PE P-36:2|PE P-18:1_18:1	1.38171	0.405044	1.06623	0.630436	1.163	0.0106496	1.20106	0.0551626	1.36965	0.140411	1.18251	0.297524	1.082	0.50194	1.27025	0.102099
		PE P-40:1|PE P-18:0_22:1	1.4698	0.333075	0.93367	0.673121	1.50001	0.0348406	1.46593	0.0667835	1.3195	0.0991376	0.966046	0.770386	1.05935	0.716238	1.16275	0.193423
		PE P-40:8|PE P-18:2_22:6	1.05856	0.628946	1.20103	0.00182011	1.07418	0.117546	1.05844	0.240263	1.00139	0.990127	1.08561	0.172121	0.970946	0.493367	1.0564	0.390727
		PI 32:0	1.64072	0.130006	1.03649	0.770342	1.53987	0.0457816	1.41997	0.0102946	1.1575	0.367422	1.26832	0.377741	1.47502	0.0876358	1.20628	0.35765
		PS 35:1|PS 17:0_18:1	1.51245	0.05438	1.95209	0.167802	1.31158	0.0233807	1.38226	0.0456896	1.01983	0.914254	1.77193	0.0583844	0.97927	0.904275	1.12294	0.495254
		TG 40:0|TG 12:0_14:0_14:0	1.62471	0.0315215	4.84775	0.0535556	2.54113	0.00655306	5.27474	0.328957	0.813124	0.607716	0.532382	0.219544	0.644241	0.309979	1.08662	0.83512
		TG 42:4|TG 8:0_16:2_18:2	4.95713	0.302866	2.65868	0.472724	21.944	0.000126262	11.8463	0.0705965	0.0623701	0.0705789	0.103679	0.0810957	0.235884	0.128228	0.22198	0.119747
		TG 48:5|TG 12:0_18:2_18:3	1.28709	0.25434	1.56452	0.044493	1.02013	0.807639	0.874368	0.100933	1.12424	0.728094	1.11102	0.832279	1.15649	0.673739	0.931655	0.849589
		TG 60:6|TG 18:1_18:1_24:4	3.49028	0.0331779	1.28436	0.622141	1.15771	0.778209	0.89684	0.830993	2.05001	0.242705	1.03553	0.934505	1.34454	0.238137	0.530013	0.164878
		TG 62:2|TG 26:0_18:1_18:1	4.045	0.0346516	2.32688	0.0354398	2.74954	0.0512184	2.75311	0.234211	2.54295	0.0720104	2.05693	0.301037	1.87064	0.0742877	1.96856	0.123516
	↓	DG 36:4|DG 16:0_20:4	0.866974	0.348807	1.00413	0.963256	1.07567	0.498619	0.583366	0.00526532	1.15948	0.289891	1.49067	0.0624637	0.983092	0.842339	0.874599	0.148156
		PE 34:4|PE 16:1_18:3	1.76326	0.308289	1.44906	0.34364	0.471988	0.118993	0.294198	0.0467115	1.30729	0.660771	1.26296	0.57632	1.1787	0.713527	0.315823	0.127054
		PE P-42:4|PE P-18:0_24:4	0.989658	0.843382	0.887368	0.0497415	1.09173	0.497542	1.06832	0.254572	1.04134	0.60616	0.953496	0.691102	1.0684	0.426933	0.936575	0.444039
		PI 40:3	0.985717	0.920727	0.973074	0.872718	0.591059	0.0130185	1.03668	0.756861	1.39181	0.0718869	1.25999	0.121581	1.22937	0.434797	0.869392	0.273181
		SM 33:1;2O|SM 17:1;2O/16:0	0.922726	0.48243	0.856254	0.117038	0.709772	0.0130157	0.751953	0.00125066	1.28535	0.170179	1.04572	0.828227	1.08054	0.695336	0.974322	0.913026
		SM 34:0;3O	0.956512	0.547989	0.842573	0.0261304	0.88192	0.059143	0.844217	0.0193153	0.930983	0.61639	0.717885	0.0747663	0.988885	0.917237	0.870596	0.281114
		SM 34:1;3O	0.838903	0.106105	0.74022	0.016371	0.863525	0.285795	0.899126	0.212607	0.838618	0.362721	0.639409	0.0804013	0.994301	0.968221	0.944339	0.743215
		SM 40:0;3O	0.698916	0.142034	0.538522	0.00555194	1.24034	0.073369	1.0536	0.764853	0.680754	0.439318	0.380451	0.0982106	0.652621	0.318677	0.625323	0.262305
		SM 41:0;3O	0.732029	0.243532	0.587358	0.00244959	1.18802	0.186873	1.12064	0.615136	1.04714	0.890266	0.748202	0.366573	0.891316	0.701588	0.75411	0.380383
		SM 41:3;2O	0.604566	0.116868	0.674802	0.314396	0.628755	0.228563	0.439329	0.0372932	1.12662	0.733299	1.00787	0.984877	0.721298	0.278577	0.848589	0.676737
		SM 42:3;2O	0.88736	0.24288	0.931619	0.457021	0.744672	0.158599	0.781033	0.0265615	1.16381	0.431182	1.12345	0.299289	1.0915	0.512985	0.97594	0.860069
		TG 38:1|TG 8:0_12:0_18:1	0.412857	0.119475	0.289512	0.0486762	0.161818	0.0234161	0.18171	0.0281849	0.848588	0.846635	0.340037	0.391016	1.69527	0.595702	0.524933	0.571533
		TG 40:1|TG 8:0_16:0_16:1	0.411053	0.0372575	0.474185	0.225917	0.239216	0.0334981	0.815771	0.775119	1.01291	0.984805	0.128599	0.192081	1.58634	0.672213	0.635121	0.608428
		TG 47:2|TG 13:0_16:0_18:2	1.22897	0.71255	0.884824	0.816966	0.217196	0.0319812	45.9338	0.354303	0.974771	0.982347	0.459752	0.537338	3.22407	0.400424	3.65936	0.430298
		TG 49:4|TG 13:0_18:2_18:2	0.18601	0.113192	0.155203	0.0952005	0	0.0456455	1.50917	0.713226	1.43491	0.811915	0	0.355918	0.210581	0.469157	0.863211	0.910354
		TG 50:7|TG 12:0_16:1_22:6	0.173586	0.0105642	0.435623	0.0823414	0.0929268	0.0063939	0.231835	0.0198166	0.715837	0.403943	2.02529	0.0890801	1.03522	0.916495	0.788333	0.402729
		TG 53:6|TG 17:1_18:2_18:3	0.981459	0.941325	1.23704	0.360672	0.844548	0.410935	0.654633	0.0433197	0.98591	0.949687	1.32384	0.139382	1.28027	0.332829	0.749531	0.19213
		TG 57:4|TG 18:1_21:1_18:2	0.64439	0.239853	0.310993	0.0210935	0.438603	0.0641316	0.416003	0.0350697	1.49033	0.453484	0.8632	0.792008	1.6919	0.347174	0.83125	0.714947
		TG 59:1|TG 16:0_25:0_18:1	1.51153	0.314313	1.06072	0.876176	0.548382	0.0188302	1.12687	0.698309	1.64119	0.266939	1.67632	0.176305	2.18018	0.121124	0.961501	0.807657
		TG 59:11|TG 16:0_21:5_22:6	0.186525	0.0760212	0.194511	0.0790026	0.172309	0.0713184	0.0593631	0.0435495	0.219036	0.108499	0.323868	0.168119	0.126936	0.0725682	0.497219	0.302121
		TG 60:14|TG 18:3_20:5_22:6	0.834951	0.643581	0.271362	0.0197521	0.484712	0.122856	0.456515	0.0827378	2.50851	0.177349	4.39353	0.090934	1.45899	0.423938	2.18955	0.204571
		TG 70:5|TG 34:1_18:2_18:2	1.02671	0.899902	0.264722	0.00637798	0.436304	0.0875846	0.592285	0.137499	0.817848	0.689236	1.49223	0.604923	0.539326	0.0790977	0.611203	0.156855
HIP only	↑	CE 18:3	1.06692	0.833374	1.0631	0.828692	1.0148	0.960475	0.91644	0.775941	2.12585	0.317486	2.14143	0.0197992	1.80332	0.0799835	1.88712	0.390296
		CE 20:3	1.64592	0.65038	0.90696	0.926733	0.619495	0.70084	0.657282	0.734706	0.437724	0.282659	1.9866	0.304717	3.97858	0.00200273	3.68186	0.132918
		CE 22:6	1.18567	0.59522	1.77521	0.191576	1.10587	0.817137	1.27053	0.688132	1.46572	0.13347	1.71863	0.0468978	1.49747	0.0349196	1.55439	0.0545099
		DG 30:0|DG 14:0_16:0	2.69303	0.180458	2.04046	0.452465	3.30061	0.0851191	2.88045	0.150193	0.608821	0.211211	1.40143	0.463674	2.34787	0.175617	1.91935	0.0458445
		DG 32:0|DG 16:0_16:0	1.32476	0.160798	1.34736	0.118061	1.3007	0.124755	1.22516	0.327174	1.27617	0.204886	1.48947	0.00751933	1.46419	0.151379	1.35139	0.0137468
		DG 32:1|DG 16:0_16:1	2.81954	0.171442	0.850371	0.832984	1.70017	0.437086	3.51634	0.0948988	3.1529	0.0173366	2.60742	0.171787	2.10017	0.0650722	1.12376	0.79878
		DG 34:0|DG 16:0_18:0	1.06275	0.578841	1.33357	0.222153	1.11155	0.415119	1.05505	0.662751	1.1636	0.46487	1.50878	0.0245485	1.51948	0.222658	1.1052	0.550209
		DG 34:2|DG 16:0_18:2	0.925596	0.713347	0.723716	0.306773	1.03091	0.906784	1.30263	0.24645	1.74149	0.0399554	1.39356	0.256191	2.65872	0.00220524	2.33142	0.0497245
		DG 35:1|DG 17:0_18:1	2.01079	0.299591	1.40389	0.442654	0.965384	0.943358	1.18408	0.743752	1.76169	0.169359	1.80295	0.00923235	1.87204	0.168449	1.19671	0.408574
		DG 35:2|DG 17:0_18:2	3.18658	0.0519793	2.01448	0.502274	0.998496	0.99866	1.41743	0.630643	1.07772	0.818879	1.56171	0.00531568	1.11534	0.467289	0.782812	0.0702188
		DG 36:0|DG 16:0_20:0	1.21825	0.47901	1.48337	0.14367	1.16448	0.288914	1.37102	0.2891	1.35272	0.535086	1.96998	0.0495365	1.58605	0.281889	1.11774	0.729252
		DG 36:2|DG 18:1_18:1	1.54594	0.139649	1.28821	0.111389	1.10552	0.501358	1.09968	0.438235	1.16453	0.434682	1.47461	0.0451962	1.33196	0.155413	1.02268	0.86155
		DG 36:3|DG 18:1_18:2	1.01033	0.915785	1.00458	0.974177	1.0045	0.973323	0.960672	0.804976	1.45686	0.109168	1.29054	0.0131333	1.54781	0.00034669	1.51287	0.018662
		DG 38:1|DG 18:0_20:1	2.01707	0.172351	2.09775	0.0698387	1.48128	0.202721	1.20078	0.672408	1.56099	0.389382	2.12187	0.045795	1.63545	0.243102	1.03418	0.922509
		DG 38:3|DG 20:1_18:2	1.02888	0.927517	1.17557	0.56484	1.25668	0.474991	0.544902	0.0898312	1.17168	0.558318	1.78024	0.0184908	1.21658	0.476511	0.767318	0.304892
		DG 38:4|DG 18:1_20:3	0.94952	0.850565	1.10744	0.700796	1.07806	0.774431	0.540074	0.0717665	1.12952	0.577887	1.71638	0.0175463	1.14799	0.544746	0.695332	0.15778
		DG 38:5|DG 18:1_20:4	0.916146	0.674648	1.0858	0.591328	1.23396	0.143808	0.696788	0.0525788	1.1816	0.271585	1.66428	0.016802	1.11472	0.540555	0.943618	0.748104
		DG 40:1|DG 22:0_18:1	2.27855	0.209704	1.83858	0.238133	1.43414	0.464799	1.28246	0.62438	1.53292	0.45591	2.34617	0.0375707	1.65934	0.222494	1.06175	0.86514
		DG 40:2|DG 18:1_22:1	3.95253	0.31022	3.04277	0.228039	1.60974	0.674072	1.58143	0.686039	1.65472	0.336235	2.2807	0.0483039	1.69732	0.242491	1.11324	0.786589
		DG 41:1|DG 23:0_18:1	2.11222	0.309824	1.73887	0.435547	1.36014	0.560792	1.86849	0.237207	1.35126	0.631457	2.62247	0.025461	1.8588	0.192089	0.850336	0.710901
		DG 48:6	0.97852	0.933548	1.19414	0.38345	1.0177	0.937097	0.946518	0.818403	1.02269	0.899197	1.44988	0.0176986	0.914139	0.644889	1.09501	0.53324
		FA 14:0	1.02358	0.849757	1.22596	0.171486	0.959665	0.75433	1.20656	0.16004	1.0566	0.544516	1.06893	0.284002	1.35015	0.00668912	1.24224	0.141588
		FA 17:0	1.15899	0.37788	1.13568	0.280913	0.929728	0.35039	0.978914	0.83784	1.10674	0.433243	1.00114	0.985505	1.32269	0.0178272	0.989419	0.889372
		FA 19:0	1.05875	0.64232	1.22	0.0903905	0.883128	0.0994395	1.05984	0.367935	1.0973	0.350667	1.26286	0.011686	1.37683	0.00879258	1.11192	0.184197
		FA 21:0	0.885323	0.448505	1.39884	0.150997	0.965123	0.792549	1.08302	0.656957	0.988749	0.957323	1.17999	0.235998	1.41046	0.0443104	1.20624	0.155951
		HexCer 36:2;2O|HexCer 18:2;2O/18:0	1.3888	0.490463	1.43655	0.392876	1.25996	0.484248	1.12612	0.493037	1.40913	0.346699	1.58526	0.0499737	1.14837	0.525418	1.1731	0.491811
		HexCer 42:1;3O|HexCer 18:1;2O/24:0;O	1.33719	0.36633	1.19365	0.269326	1.25912	0.275518	1.31238	0.210408	1.25302	0.115648	1.53876	0.0372	1.04674	0.69814	0.960163	0.693976
		LPC 20:1	1.46905	0.0845687	1.43701	0.137832	1.01358	0.919324	0.971082	0.861935	1.06398	0.528747	1.29873	0.0388392	1.24371	0.29197	0.980131	0.832517
		LPE 16:0	1.22626	0.146022	1.19589	0.234993	0.881201	0.240869	0.883598	0.249067	1.00502	0.964634	1.23382	0.0117145	0.967763	0.726562	0.87402	0.0568094
		LPE 16:1	1.28275	0.0696555	1.52831	0.0774665	0.980269	0.84856	1.27778	0.271809	1.09452	0.709818	1.63419	0.0170062	1.30177	0.15725	0.9614	0.820006
		LPE 18:1	1.69813	0.0514926	1.6489	0.103262	0.859665	0.351263	0.840569	0.317068	1.45828	0.130261	3.32643	0.00136127	1.22315	0.296451	1.01046	0.878145
		LPE 18:2	1.10189	0.695864	1.06332	0.80452	0.984141	0.946368	1.06633	0.77068	1.17615	0.154009	1.56246	0.00414878	1.27615	0.134368	1.28101	0.0606638
		LPE 20:4	1.89546	0.100201	1.76386	0.188349	0.734348	0.140727	0.774376	0.19318	1.20284	0.336963	1.9711	0.000304625	0.905229	0.650623	0.829936	0.109787
		LPE 22:3	1.23403	0.0975571	1.6707	0.162914	0.992293	0.932841	0.85826	0.138086	1.03484	0.775001	2.43922	0.0103929	1.09886	0.481475	0.833439	0.0150278
		LPE 22:6	1.93418	0.0837842	1.83715	0.170568	0.675417	0.0728774	0.65395	0.0556375	1.36217	0.193351	2.54645	7.08962e-06	0.863742	0.471851	0.789003	0.0371766
		LPE O-20:2	0.992022	0.871177	1.11775	0.363945	0.90568	0.160068	0.961785	0.692536	1.2983	0.0822248	1.20559	0.117475	1.40157	0.0400331	1.2325	0.303551
		MG 20:4	1.38715	0.280114	1.35355	0.0663839	1.31253	0.194663	0.546241	0.054837	1.26937	0.190401	1.531	0.0290623	1.24243	0.344826	0.807577	0.425991
		PC 28:0|PC 14:0_14:0	1.38779	0.0781792	1.25547	0.244819	0.847312	0.260884	0.877054	0.268676	1.30903	0.0957801	1.50161	0.0136525	1.07278	0.684425	0.928806	0.611636
		PC 29:0|PC 14:0_15:0	1.51618	0.193996	1.20068	0.292155	0.945033	0.64518	0.921042	0.544796	1.37929	0.0928523	1.46561	0.0318497	1.02668	0.865466	0.947335	0.745552
		PC 32:1|PC 16:0_16:1	1.03569	0.570702	1.13053	0.109324	0.979926	0.687349	0.978888	0.672137	1.01937	0.513008	1.08429	0.0404365	0.954895	0.154596	0.908499	0.0503394
		PC 35:0	1.33532	0.0622784	1.13865	0.0985066	1.12492	0.277121	1.13428	0.144629	1.38405	0.0492867	1.37506	0.0827692	1.14633	0.287384	0.984213	0.898508
		PC 35:1	1.17493	0.238311	1.14647	0.0646085	1.04432	0.353358	1.06185	0.178716	1.35555	0.00393906	1.40726	0.0879771	1.13992	0.139532	1.08552	0.347133
		PC 36:3|PC 18:1_18:2	0.990558	0.894493	1.13812	0.121972	1.06143	0.383398	1.10876	0.189233	0.994421	0.861136	1.12188	0.0187601	1.06482	0.0783936	1.08364	0.0615773
		PC 36:4|PC 16:0_20:4	0.920955	0.262378	1.08572	0.202483	0.986784	0.838811	0.973378	0.657459	0.940951	0.197313	1.09059	0.0464377	0.930843	0.106169	0.964531	0.282734
		PC 36:5	1.11914	0.392606	1.13438	0.407799	0.874443	0.204365	0.875806	0.186479	0.960105	0.692987	1.18865	0.0370302	0.928634	0.444079	0.812322	0.0591883
		PC 36:6|PC 14:0_22:6	1.4227	0.136119	1.44461	0.173432	0.861447	0.262048	0.843837	0.151659	1.05333	0.678123	1.46068	0.0178273	1.06297	0.61732	0.848924	0.226675
		PC 36:7	1.39017	0.374628	0.976761	0.952986	1.26767	0.600625	1.19514	0.640447	1.34483	0.00818228	1.24375	0.0767635	2.05318	0.103477	1.41023	0.307428
		PC 37:6|PC 15:0_22:6	1.55909	0.158044	1.20546	0.179505	1.02973	0.778439	1.02554	0.81365	1.31299	0.359987	1.26844	0.0269038	1.19013	0.100509	0.957638	0.701325
		PC 39:7	1.34924	0.197806	1.16454	0.328519	0.961639	0.786423	0.974316	0.836254	1.19033	0.320827	1.44827	0.0118565	1.1665	0.147477	0.945517	0.594076
		PC 43:10|PC 21:4_22:6	0.948742	0.803891	1.18565	0.354826	0.958369	0.776754	0.965099	0.835317	1.03371	0.824454	1.12123	0.485445	1.34812	0.0252448	1.2541	0.0759158
		PC 43:5|PC 23:1_20:4	1.17058	0.530811	1.15401	0.477894	1.06549	0.788809	1.00855	0.967663	1.25491	0.279355	1.40345	0.0411786	1.19592	0.212983	0.854739	0.375468
		PC O-34:1	1.02954	0.586838	1.15955	0.0929377	1.02415	0.646979	1.0034	0.952363	1.13802	0.0365969	1.28179	0.0394817	1.00061	0.989287	0.993329	0.906768
		PC O-40:7	1.08874	0.150041	1.19886	0.0675939	1.01761	0.209115	0.976548	0.40634	1.14901	0.13619	1.22936	0.0165309	1.01754	0.76134	0.998857	0.984201
		PE 36:3|PE 18:1_18:2	0.985299	0.878279	1.07483	0.40704	1.08366	0.385288	1.23982	0.065501	0.98498	0.753191	1.02946	0.562512	1.10845	0.0544363	1.18408	0.017555
		PE 37:4|PE 17:0_20:4	1.23518	0.413623	1.17464	0.259544	0.883058	0.291972	0.873546	0.241866	1.10384	0.697395	1.19193	0.0224198	0.994061	0.921072	0.903141	0.138412
		PE 37:6|PE 15:0_22:6	1.40874	0.123109	1.37836	0.282754	1.0283	0.852172	1.02157	0.886572	1.15191	0.391028	1.60081	0.0064613	1.09118	0.242532	0.91004	0.370481
		PE 40:2|PE 20:1_20:1	1.34548	0.354037	1.01894	0.916232	1.31304	0.108485	1.29896	0.108363	1.53504	0.0428895	1.201	0.304951	1.06029	0.718391	1.07088	0.559209
		PE O-42:2|PE O-18:1_24:1	1.09773	0.70193	0.674032	0.0517165	1.43395	0.0580202	1.46813	0.0749179	1.24563	0.0190514	1.09563	0.270108	1.10802	0.336392	1.10951	0.241705
		PE P-32:1|PE P-18:1_14:0	0.940009	0.879059	1.41118	0.535188	1.17298	0.655728	1.21177	0.510989	1.76401	0.117283	1.35493	0.457399	1.00276	0.991414	2.01629	0.0219365
		PE P-35:1|PE P-17:0_18:1	1.49205	0.165722	0.998458	0.990322	1.18839	0.194584	1.21265	0.173147	1.51685	0.0313756	1.11288	0.496894	1.18021	0.319973	1.12244	0.494355
		PE P-35:2|PE P-17:1_18:1	2.22222	0.239576	1.23113	0.530297	1.53495	0.134871	1.49979	0.223744	2.15519	0.0402351	1.54996	0.226182	1.35603	0.250566	1.32611	0.314725
		PE P-37:4|PE P-17:0_20:4	1.02779	0.8425	0.982581	0.876705	1.01541	0.89154	1.03804	0.749931	1.2018	0.00744157	1.13364	0.297844	1.09022	0.362032	1.01515	0.855187
		PE P-38:5|PE P-18:1_20:4	0.959207	0.581716	1.07778	0.221548	0.997089	0.966038	0.984834	0.814922	1.01494	0.575369	1.05475	0.0193759	0.941302	0.0047204	1.00219	0.890968
		PE P-40:9|PE P-18:3_22:6	1.36093	0.124048	1.68182	0.15683	1.02842	0.788795	0.866758	0.258254	1.0675	0.621549	1.78326	0.00465662	0.977799	0.892148	0.759804	0.186229
		PE P-44:7|PE P-22:1_22:6	1.00205	0.982344	0.995751	0.965281	1.0066	0.955982	1.02247	0.849884	1.00205	0.982012	1.22628	0.00206576	1.21823	0.036565	0.97079	0.646904
		PG 40:8|PG 18:2_22:6	1.32986	0.164429	1.14944	0.381521	1.16783	0.434545	1.27077	0.145059	1.02223	0.864392	1.05645	0.762419	1.54693	0.0264569	1.2425	0.211698
		SM 34:2;3O	1.01157	0.962564	2.02574	0.183181	0.660529	0.218559	0.760426	0.396594	1.26206	0.460516	2.20457	0.00377162	1.14865	0.54963	0.933215	0.838678
		SM 40:7;2O|SM 18:2;2O/22:5	1.41436	0.0817308	1.51702	0.21778	0.882727	0.386873	0.852341	0.300204	1.06134	0.544698	1.56977	0.0139102	1.07961	0.614807	0.869255	0.254621
		ST 27:1;O	1.34572	0.185133	1.95305	0.208629	0.846699	0.443312	0.74568	0.195269	1.15897	0.416894	2.40175	0.0138752	1.16448	0.507061	0.833996	0.347203
		TG 45:1|TG 14:0_15:0_16:1	0.817674	0.683783	1.86042	0.286469	0.922965	0.88919	41.2273	0.358086	1.41724	0.229237	1.31677	0.570771	3.19533	0.290115	3.70621	0.0451993
		TG 53:7|TG 15:0_18:2_20:5	1.11467	0.551976	1.42792	0.131001	0.919597	0.492277	0.794175	0.0607651	0.997818	0.983872	1.38001	0.0408649	1.00861	0.943392	0.833015	0.102667
		TG 66:2|TG 16:0_18:1_32:1	2.7767	0.180315	1.75251	0.336931	1.39883	0.721863	2.41168	0.233111	1.91409	0.27874	1.84703	0.0723757	2.38657	0.294584	2.10862	0.000781621
	↓	CL 68:4|CL 16:1_18:1_16:1_18:1	0.950132	0.671245	0.425905	0.0690838	1.13408	0.392361	1.13233	0.316896	1.01596	0.944901	0.186716	0.0039325	0.921776	0.257183	0.807818	0.0673677
		CL 72:4|CL 18:1_18:1_18:1_18:1	0.868151	0.286185	0.433434	0.0673148	1.11846	0.248836	1.07197	0.373662	0.928682	0.568201	0.188911	0.00263068	0.975911	0.791921	0.933337	0.401115
		CL 72:5|CL 18:1_18:1_18:1_18:2	0.914946	0.351825	0.46321	0.0881787	1.08139	0.358054	1.0616	0.411445	0.907175	0.49532	0.213985	0.00638652	0.9837	0.8374	0.980576	0.815824
		CL 72:7|CL 18:1_18:2_18:2_18:2	0.982622	0.854781	0.461457	0.0852636	1.02385	0.826464	1.0487	0.631411	0.933437	0.637398	0.263768	0.00897666	0.950875	0.49658	0.869041	0.188292
		CL 74:11|CL 36:5_38:6	1.07544	0.605973	0.509867	0.106961	0.952813	0.766405	0.991145	0.947046	0.991078	0.953715	0.353792	0.0398392	1.00433	0.967669	0.902294	0.356218
		CL 74:9|CL 18:1_18:2_18:2_20:4	1.02791	0.805951	0.497872	0.0975858	0.992094	0.949204	1.00918	0.932331	0.941313	0.598018	0.3121	0.0182122	0.981689	0.799663	0.876892	0.162122
		CL 76:9|CL 18:1_18:1_18:1_22:6	0.971678	0.791578	0.476754	0.0884653	0.999815	0.998798	0.948767	0.589202	0.903177	0.247888	0.300576	0.0124247	0.973161	0.665159	0.884129	0.133274
		CL 78:12|CL 18:1_18:1_20:4_22:6	1.02061	0.875778	0.507858	0.104613	0.946793	0.712999	0.897203	0.421692	0.903858	0.371207	0.358319	0.0288267	0.976848	0.79737	0.838554	0.108277
		CL 78:13|CL 18:1_18:2_20:4_22:6	1.06241	0.655545	0.507907	0.0984871	0.930375	0.642602	0.923103	0.555791	0.916665	0.509748	0.375554	0.0378235	0.98124	0.843829	0.860829	0.186611
		CL 78:14|CL 16:1_18:1_22:6_22:6	1.06165	0.609338	0.539097	0.0948118	0.904497	0.460822	0.896695	0.36793	0.952148	0.682574	0.414933	0.0445401	1.00358	0.95886	0.857912	0.0945394
		CL 80:14|CL 18:1_18:1_22:6_22:6	1.06437	0.651794	0.53765	0.118835	0.925438	0.612978	0.861574	0.306551	0.896772	0.267488	0.397013	0.0348749	1.00583	0.945641	0.820726	0.0616438
		CL 80:15|CL 18:1_20:4_20:4_22:6	1.06396	0.658338	0.556215	0.123975	0.932547	0.644931	0.894914	0.433038	0.903755	0.345291	0.436814	0.0440168	0.984707	0.849794	0.829106	0.0596092
		CL 82:17|CL 18:1_20:4_22:6_22:6	1.09978	0.530832	0.564006	0.126394	0.930185	0.648673	0.85803	0.331275	0.917845	0.373496	0.434023	0.0462411	1.01178	0.888815	0.785545	0.0410268
		DG 52:1	1.07919	0.753509	0.845914	0.589232	0.775735	0.43597	0.648725	0.169431	0.909047	0.39815	1.0804	0.576126	0.818864	0.131223	0.591216	0.00778588
		DG 52:2	1.24798	0.384962	0.914677	0.7748	0.945027	0.860442	0.85074	0.587105	1.02368	0.876591	0.994208	0.97434	0.89833	0.502144	0.634606	0.043843
		PC 38:5	0.996424	0.904643	1.08589	0.167358	0.993209	0.774956	0.960836	0.159883	0.968704	0.52792	1.07718	0.0706273	0.949181	0.249792	0.929675	0.0499525
		PC 42:8	0.969752	0.500402	1.05499	0.181674	0.998745	0.980133	1.02402	0.625298	0.913137	0.105039	0.904573	0.0670713	1.04845	0.492911	0.884607	0.0204335
		PC 43:9	0.994182	0.969244	0.614305	0.101965	0.926298	0.664228	1.03278	0.832218	0.954223	0.712416	0.331019	0.0042933	0.962907	0.767485	0.972213	0.82128
		PC 50:4	1.06643	0.730075	0.97412	0.861198	0.929351	0.71829	0.838134	0.293317	0.86572	0.368562	0.833583	0.268514	0.904482	0.411468	0.6897	0.0363493
		PC 50:6	1.14121	0.43874	1.11195	0.498567	0.920398	0.624412	0.816207	0.233549	1.15366	0.301794	1.19874	0.24373	1.3234	0.0335013	0.777037	0.0496352
		PC 52:4	0.982117	0.90673	0.889191	0.441357	0.967016	0.837825	0.864908	0.352126	0.809638	0.157209	0.832023	0.199461	0.945606	0.505414	0.703646	0.00449258
		PC 52:6	1.23235	0.230636	1.14293	0.578001	1.01189	0.947576	0.878659	0.37043	0.970528	0.811864	1.08181	0.519497	1.04232	0.668137	0.76092	0.0488462
		PC 52:7	1.26433	0.374581	1.2678	0.447148	0.986504	0.961629	0.858806	0.584261	0.915378	0.645775	1.18964	0.387996	1.15498	0.390394	0.502704	0.00433631
		PC 54:6	1.12799	0.503015	0.961169	0.840783	0.947289	0.78921	0.859081	0.489486	0.961151	0.707036	0.971638	0.814919	1.07015	0.524898	0.724588	0.0192128
		PC 54:7	1.1774	0.35625	1.1904	0.517168	0.968204	0.87043	0.851957	0.310374	0.993334	0.954013	1.23533	0.161968	1.07388	0.580217	0.772485	0.0444757
		PC 54:8	1.18113	0.337971	1.16904	0.472416	1.0121	0.946596	0.890819	0.539941	0.92817	0.48761	1.19988	0.1636	1.0499	0.642819	0.758032	0.0297666
		PC 56:6	1.07445	0.659223	0.938666	0.687791	1.01243	0.946255	0.898471	0.496764	0.895427	0.355575	0.939338	0.532918	0.988656	0.914352	0.72252	0.0269242
		PC 56:9	1.14795	0.352847	1.1549	0.549422	0.973647	0.898218	0.846495	0.337569	0.900104	0.236657	1.17485	0.139064	1.05025	0.61235	0.771424	0.0324095
		PC 58:8	0.949965	0.746777	1.00667	0.966576	0.946971	0.744297	0.889563	0.459862	0.885034	0.123392	1.02509	0.772278	1.0292	0.801607	0.79116	0.0157127
		PC 58:9	1.11296	0.474935	1.05151	0.744736	1.02178	0.888336	0.913601	0.535747	0.910739	0.391709	1.05833	0.628005	1.08949	0.467101	0.77433	0.0295903
		PC 60:12|PC 30:6_30:6	1.18231	0.29367	1.26715	0.360412	0.982784	0.915957	0.839214	0.291988	0.903777	0.298482	1.23847	0.0687262	0.988246	0.915067	0.737428	0.01731
		PC O-34:0	1.04003	0.700635	0.993823	0.955871	1.00743	0.950964	0.95672	0.652571	0.984067	0.864587	0.99032	0.927228	1.02164	0.817935	0.808072	0.0427805
		PC O-36:0	1.08054	0.509165	1.01041	0.925234	0.962389	0.798394	0.930279	0.41204	1.0554	0.626087	0.842138	0.251953	0.984901	0.901674	0.727504	0.0486104
		PC O-39:8	0.916584	0.152754	0.957153	0.307032	0.962449	0.360663	0.952396	0.190921	0.870557	0.023203	0.896867	0.27088	0.958254	0.454975	0.983965	0.731812
		PE 19:1	1.10858	0.652593	1.30806	0.102908	1.25382	0.0938815	0.758881	0.226527	1.01965	0.931478	0.790776	0.271335	1.39878	0.38662	0.615691	0.0350185
		PE 21:3	0.881446	0.278726	1.03126	0.747622	1.03718	0.685376	0.788696	0.0661068	0.802785	0.102906	0.689881	0.0137888	1.25764	0.507982	0.667221	0.0170314
		PE 23:4	0.918625	0.459073	1.11477	0.360891	1.1074	0.402372	0.833464	0.114077	0.858019	0.337281	0.719754	0.051596	1.32046	0.422708	0.651558	0.027886
		PE 32:1|PE 16:0_16:1	0.931998	0.389863	0.948507	0.518168	0.937607	0.40086	0.888162	0.121189	0.928903	0.229149	0.858131	0.0252129	0.836484	0.0111205	0.747655	0.000974676
		PE 34:1|PE 16:0_18:1	1.07676	0.359087	1.00706	0.935541	0.88568	0.267146	0.81421	0.0825362	0.983002	0.792176	1.02381	0.778839	0.985647	0.81782	0.806036	0.0183615
		PE 36:4|PE 16:0_20:4	0.921071	0.265083	1.03097	0.595794	0.968744	0.605529	0.943804	0.36951	0.91722	0.133695	0.999873	0.99765	0.936145	0.0177968	0.897821	0.000912526
		PE 36:4|PE 18:2_18:2	0.923943	0.287172	1.03698	0.543034	0.966473	0.583982	0.943514	0.372637	0.912228	0.113251	1.0097	0.824388	0.932053	0.0169379	0.896181	0.00119077
		PE 38:8	1.05283	0.721403	0.699177	0.156551	1.01057	0.945561	1.13701	0.322994	0.925909	0.604751	0.41807	0.0015539	1.04139	0.421081	0.962141	0.621703
		PE 40:7|PE 18:1_22:6	1.03343	0.71746	1.00787	0.931083	1.0564	0.583111	1.05292	0.555474	1.0167	0.813323	0.777798	0.00569401	1.00544	0.901419	0.927097	0.278785
		PE 40:8	0.949707	0.739498	0.660697	0.102647	0.990272	0.943633	1.06844	0.599816	0.971921	0.793943	0.391493	0.00785373	1.06699	0.474026	1.04556	0.619696
		PE 44:10|PE 22:4_22:6	0.935585	0.65897	0.692166	0.0800622	1.12185	0.388877	1.19321	0.116755	0.894257	0.107992	0.47805	0.00126033	0.978117	0.762931	0.960494	0.531667
		PE 44:12|PE 22:6_22:6	0.877118	0.511974	0.530111	0.0950985	0.943716	0.662974	0.943225	0.656832	0.940648	0.454582	0.317732	0.00627897	0.973082	0.699974	0.997205	0.967647
		PE O-42:9|PE O-20:3_22:6	1.1642	0.457509	1.22269	0.256592	0.830244	0.276644	0.778744	0.143237	1.02801	0.842513	1.23509	0.0367665	1.0397	0.388452	0.943539	0.365366
		PE P-42:1|PE P-18:1_24:0	1.21959	0.709118	0.349458	0.153885	0.758154	0.566971	1.08414	0.854713	1.09205	0.731409	0.437763	0.0360048	1.11822	0.60742	0.754798	0.222722
		PI 36:1	1.02076	0.721374	1.02293	0.764324	0.975865	0.791571	0.888829	0.19868	0.917835	0.215927	0.993173	0.918826	1.0211	0.790682	0.820744	0.0304244
		PI 36:4|PI 16:0_20:4	0.937101	0.330465	0.63656	0.108939	0.931663	0.334544	0.929475	0.283996	0.867635	0.263135	0.448226	0.0368019	0.932998	0.327288	0.851054	0.0390596
		PI 40:4	0.907361	0.786881	0.667454	0.397148	1.11581	0.74156	1.21705	0.555171	0.834507	0.328473	0.390075	0.03913	0.831665	0.53985	1.0393	0.875261
		PS 38:2|PS 18:1_20:1	0.960451	0.79016	0.9994	0.996699	1.16914	0.180349	1.22396	0.169322	1.03723	0.665783	0.705256	0.00518458	0.945883	0.614957	1.16306	0.102913
		PS 38:4|PS 18:0_20:4	1.09628	0.309479	0.913957	0.199704	1.00658	0.944194	1.03602	0.626075	1.00443	0.969143	0.554229	0.025161	1.03416	0.780953	0.985947	0.898191
		PS 41:6|PS 19:0_22:6	0.805979	0.149673	0.584249	0.118026	0.973806	0.719308	1.04349	0.546179	0.876398	0.392981	0.306597	0.00618773	0.956081	0.775411	0.924156	0.589098
		PS 42:10|PS 20:4_22:6	0.972976	0.878301	0.523051	0.107017	1.06369	0.766996	1.13146	0.45052	0.841495	0.155806	0.338695	0.0255041	1.09376	0.509057	0.919267	0.445977
		PS 42:8	1.11587	0.506387	0.596984	0.152655	1.03285	0.850394	1.05042	0.740844	0.907678	0.476489	0.361305	0.041079	1.0981	0.456113	0.823651	0.152567
		PS 44:10|PS 22:4_22:6	0.951827	0.748924	0.513808	0.102229	0.98715	0.933706	1.0324	0.816197	0.880845	0.19159	0.287419	0.0153915	0.98534	0.860784	0.829218	0.0719162
		PS 44:12|PS 22:6_22:6	1.04342	0.832809	0.525545	0.134192	0.952484	0.819411	1.00456	0.98113	0.860558	0.26125	0.30547	0.0245124	1.06366	0.614848	0.827871	0.14389
		PS 46:11|PS 24:5_22:6	1.02917	0.834007	0.602776	0.173068	0.948939	0.730077	0.991682	0.955432	0.873393	0.236808	0.320073	0.0171913	0.961752	0.658793	0.798357	0.116759
		SM 35:1;2O	1.08994	0.672068	0.992035	0.877872	1.03172	0.487897	0.977875	0.748526	1.18182	0.60281	0.852169	0.167135	0.940883	0.131747	0.906442	0.0339699
		SM 36:2;2O|SM 18:1;2O/18:1	0.793421	0.164817	0.997006	0.974716	0.993613	0.945595	0.976917	0.818807	0.837823	0.189168	0.975181	0.63104	0.897653	0.0967596	0.865655	0.0437208
		SM 36:3;2O	0.861468	0.290203	0.961607	0.812211	0.945391	0.73487	0.897437	0.273562	0.867671	0.370321	1.03165	0.704609	0.882215	0.143734	0.752872	0.0219458
		SM 39:1;2O	0.965844	0.704322	0.846983	0.114214	1.13541	0.307325	1.09676	0.242996	0.916949	0.246402	0.776879	0.00595185	0.960489	0.614964	0.75419	0.00687621
		TG 52:6|TG 16:1_18:2_18:3	1.27046	0.490052	0.785226	0.506344	0.565064	0.197461	0.504748	0.138343	0.947806	0.800709	0.925147	0.727697	0.581555	0.0571542	0.342308	0.00640138
		TG 56:5|TG 18:1_18:2_20:2	1.14659	0.516355	0.909706	0.750012	0.721794	0.274634	0.643485	0.109431	1.01251	0.914886	1.02489	0.872756	0.918869	0.584474	0.663005	0.0338743
		TG 56:6|TG 16:0_18:1_22:5	1.12554	0.585188	0.882583	0.673518	0.681128	0.219699	0.562829	0.068854	0.877487	0.371815	1.05356	0.731426	0.724178	0.0277587	0.523202	0.00241204
		TG 58:10|TG 18:2_18:2_22:6	1.27309	0.336254	1.1916	0.610667	0.822517	0.424235	0.790409	0.278822	0.877379	0.417051	1.30432	0.159231	0.812288	0.0422329	0.662956	0.00083228
		TG 60:12|TG 16:0_22:6_22:6	1.34339	0.230423	1.04268	0.890218	0.759718	0.339668	0.686764	0.162175	0.920143	0.67159	1.159	0.434602	0.775343	0.114446	0.635959	0.0166859
		TG 60:13|TG 18:2_20:5_22:6	1.8194	0.204259	1.54798	0.285786	0.762891	0.52475	0.710322	0.402436	0.939018	0.827819	1.17445	0.492185	0.977875	0.899886	0.553258	0.00430231
		TG 62:13|TG 18:1_22:6_22:6	1.4411	0.119936	1.14186	0.603707	0.859495	0.590216	0.772178	0.294452	1.03613	0.821487	1.19903	0.343968	0.832671	0.258563	0.677202	0.0342519
		TG 64:16|TG 20:4_22:6_22:6	1.25743	0.500635	1.37308	0.457253	0.723678	0.450557	0.814069	0.517346	1.41329	0.198571	1.86603	0.1931	1.10438	0.717175	0.62995	0.0334905
