# Supplementary material for: A metabolome atlas of mouse brain on the global metabolic signature dynamics following short-term fasting
Source: Signal Transduct Target Ther. 2023 Sep 8;8:334. doi: 10.1038/s41392-023-01552-y (PMC10484938; doi:10.1038/s41392-023-01552-y)
Supplement: Supplementary file 5 — Dataset 4 [file 41392_2023_1552_MOESM5_ESM.xlsx]

## Sheet: SC
Supplementary Table 9. Statistics of differential lipids in each period of fasting in SC.
FC: fold change, the ratio of metabolite level in each period pf fasting to that of Ctrl.
“↑”：Lipid that incresed after short-term fasting.
“↓”：Lipid that decreased after short-term fasting.
#DIV/0!: Lipids that could not detected in Ctrl, bot increased after STF.
	Lipid	F-3h vs. Ctrl		F-6h vs. Ctrl		F-12h vs. Ctrl		F-24h vs. Ctrl		Ref vs. Ctrl
		FC(F-3h/Ctrl)	p value	FC(F-6h/Ctrl)	p value	FC(F-12h/Ctrl)	p value	FC(F-24h/Ctrl)	p value	FC(Ref/Ctrl)	p value
↑	BMP 42:10|BMP 20:4_22:6	1.16332	0.499347	1.55712	0.0348204	1.55378	0.076915	1.30261	0.444528	1.36028	0.247938
	CAR 16:0	1.14491	0.282759	1.14709	0.134671	1.37749	0.0088051	1.05133	0.577213	1.17778	0.132531
	CAR 16:1	1.23952	0.130765	1.28122	0.0793476	1.42965	0.0091129	1.17019	0.182424	1.04322	0.623023
	CAR 18:1	1.19436	0.239648	1.23924	0.0691958	1.36708	0.0114536	1.0328	0.714446	1.18962	0.109881
	CAR 18:2	1.42904	0.0858388	1.70591	0.0174788	2.42601	0.0216371	2.15414	0.00253405	1.19196	0.218546
	CAR 20:1	1.08252	0.709776	1.41729	0.0700904	1.3902	0.0201574	1.21596	0.277116	1.31814	0.118241
	CAR 20:4	1.2536	0.181628	1.33929	0.0447048	1.28326	0.00355887	0.984159	0.904498	1.18512	0.247463
	CE 20:4	1.78377	0.255903	3.21424	0.221004	1.99285	0.0261566	1.25374	0.708926	4.41046	0.265213
	Cer 36:0;2O|Cer 18:0;2O/18:0	1.2774	0.040227	1.37241	0.0375494	1.03533	0.661631	1.12351	0.470519	1.32498	0.385261
	Cer 36:1;2O|Cer 18:1;2O/18:0	1.21689	0.0172919	1.4059	0.0619806	1.15548	0.00193965	1.16317	0.0579434	1.03362	0.568405
	Cer 36:2;2O|Cer 18:2;2O/18:0	1.31802	0.225316	2.11839	0.0435512	1.71392	0.00109468	1.60028	0.00767375	1.24271	0.0919899
	Cer 38:1;2O|Cer 18:1;2O/20:0	1.15147	0.224144	1.43371	0.0231045	1.18857	0.0131392	1.04682	0.274184	1.12474	0.100476
	Cer 38:2;2O|Cer 18:2;2O/20:0	1.25309	0.456768	1.74757	0.0523296	1.6	0.00861558	1.34412	0.0966456	1.38883	0.0161933
	Cer 40:3;2O|Cer 18:1;2O/22:2	0.967547	0.725076	1.13255	0.683604	1.08546	0.0211081	0.995851	0.97343	0.882664	0.226368
	Cer 41:2;2O|Cer 17:1;2O/24:1	1.39128	0.123106	1.31748	0.0283369	1.23444	0.210802	1.13532	0.499453	1.36171	0.0998497
	Cer 43:1;3O|Cer 18:1;2O/25:0;O	1.43423	0.0223566	1.32069	0.0130124	1.014	0.952003	0.873182	0.459834	1.53241	0.134702
	DG 30:0|DG 14:0_16:0	1.44273	0.218906	2.6724	0.0252332	0.863149	0.825933	1.44914	0.295457	1.7832	0.244663
	DG 32:0|DG 16:0_16:0	1.44723	0.219899	1.96898	0.04381	1.40435	0.0358443	1.21243	0.325248	1.52451	0.0659665
	DG 33:1|DG 15:0_18:1	1.0054	0.956559	1.27496	0.0641595	1.11258	0.135838	1.1608	0.0186571	1.16457	0.03155
	DG 33:2|DG 15:0_18:2	1.05328	0.657298	1.11956	0.188419	0.987804	0.84691	1.12502	0.0366101	1.17524	0.421976
	DG 34:0|DG 16:0_18:0	1.33944	0.385973	1.97438	0.0133067	1.37988	0.00382563	1.15469	0.499584	1.54203	0.0592066
	DG 34:1|DG 16:0_18:1	1.3522	0.136031	2.04021	0.0643199	1.55165	0.00384035	1.57345	0.0648637	1.59309	0.000996819
	DG 34:2|DG 16:0_18:2	1.85623	0.120407	2.37296	0.244494	1.86798	0.101927	2.44711	0.00416652	2.20209	0.0920397
	DG 35:2|DG 17:0_18:2	1.04389	0.364254	1.31575	0.0093468	1.09129	0.395011	1.22224	0.0362168	1.22861	0.0640846
	DG 36:0|DG 16:0_20:0	1.13032	0.656955	1.68565	0.0173471	1.35931	0.0241708	1.15854	0.460292	1.65474	0.00323552
	DG 36:1|DG 18:0_18:1	1.35023	0.374782	2.11285	0.044585	1.71874	0.0255045	1.622	0.166	1.93776	0.00634831
	DG 36:2|DG 18:1_18:1	1.30232	0.185989	1.95766	0.11993	1.51371	0.0428765	1.7377	0.0442615	1.51316	0.010444
	DG 36:3|DG 18:1_18:2	0.971908	0.59974	1.17111	0.0421232	1.12352	0.252488	1.46312	0.0421125	1.21101	0.0449814
	DG 36:4|DG 16:0_20:4	1.0827	0.266404	1.59318	0.154854	1.22728	0.00442338	1.43127	0.0428311	1.48468	0.0013153
	DG 37:3|DG 19:1_18:2	#DIV/0!	0.203183	#DIV/0!	0.0530889	#DIV/0!	0.0616079	#DIV/0!	0.0203135	#DIV/0!	0.0103073
	DG 37:4|DG 17:0_20:4	1.11052	0.536445	1.50899	0.0569954	1.22377	0.0226342	1.40046	0.101756	1.58855	0.00492211
	DG 38:1|DG 18:0_20:1	1.29037	0.386311	1.99112	0.0537348	1.53177	0.036944	1.45914	0.188109	1.77509	0.00245279
	DG 38:2|DG 18:1_20:1	1.32754	0.36085	1.94816	0.0562918	1.58664	0.0259881	1.75033	0.152994	2.0734	0.000669554
	DG 38:3|DG 20:1_18:2	1.14891	0.563436	1.7879	0.0672414	1.37503	0.00654731	1.37607	0.143934	1.74493	0.00536696
	DG 38:4|DG 18:1_20:3	1.15822	0.448993	1.90781	0.0689166	1.39192	0.00605939	1.43687	0.107038	1.69782	0.00359028
	DG 38:5|DG 18:1_20:4	1.07723	0.27389	1.62556	0.117482	1.0996	0.0370671	1.52763	0.0594637	1.41242	0.00381802
	DG 38:6|DG 16:0_22:6	1.05424	0.587159	1.2407	0.122299	1.09602	0.0329557	1.14296	0.115422	1.12775	0.0108865
	DG 40:4|DG 18:0_22:4	1.17235	0.615354	1.72634	0.0379265	1.38066	0.0444947	1.50683	0.245541	1.88907	0.00396877
	DG 40:4|DG 20:0_20:4	1.18921	0.589513	1.74651	0.0371995	1.39834	0.0458363	1.51865	0.236319	1.8958	0.0049122
	DG 40:5|DG 18:1_22:4	1.19198	0.463052	1.76143	0.0652206	1.35228	0.0368677	1.45872	0.11555	1.79764	0.000219258
	DG 40:6|DG 18:0_22:6	1.19239	0.272621	1.33561	0.041419	1.29112	0.0578123	1.21605	0.152757	1.46631	0.000457372
	DG 40:7|DG 18:1_22:6	1.12754	0.268614	1.38102	0.125041	1.24492	0.00987603	1.32648	0.0783062	1.3201	0.029296
	DG 41:1|DG 23:0_18:1	1.36289	0.448688	2.57465	0.0970574	1.93219	0.0176493	1.79865	0.0616249	2.00551	0.0332849
	DG 42:1|DG 24:0_18:1	1.29684	0.443877	2.11427	0.0456754	1.57656	0.0432289	1.57758	0.0484039	1.76788	0.000986556
	DG O-40:7|DG O-18:1_22:6	1.28769	0.589448	2.01396	0.0309958	1.94518	0.126453	1.57585	0.398485	2.06046	0.149096
	FA 16:0	1.13809	0.386365	1.36815	0.0407512	1.1722	0.12024	1.12311	0.435895	1.27117	0.0684075
	FA 18:1	1.46408	0.235657	2.00659	0.0743716	1.6246	0.0322079	1.79509	0.12941	1.78227	0.0123877
	FA 18:2	1.37459	0.30282	1.30153	0.160159	1.65257	0.00925409	1.82039	0.0417367	1.37087	0.302232
	FA 20:0	1.17009	0.292981	1.70045	0.0745511	1.29686	0.0319222	1.38755	0.0762945	1.40256	0.0100253
	FA 20:1	1.34504	0.274872	1.79206	0.0835854	1.47752	0.0483657	1.72441	0.101355	1.55983	0.0133183
	FA 20:2	1.45565	0.162134	1.63254	0.0379625	1.595	0.00734946	1.84215	0.0579172	1.57088	0.0126181
	FA 21:0	1.07526	0.48791	1.99955	0.0942395	1.37113	0.0758921	1.3234	0.0237451	1.4921	0.00596139
	FA 22:2	1.47139	0.0243547	1.63144	0.0479939	1.50497	0.0186773	1.75958	0.0448301	1.59234	0.00225549
	FA 22:3	1.61408	0.0182323	2.13824	0.148017	1.35969	0.0650208	1.50782	0.0632483	1.89604	0.0013566
	FA 22:4	1.46823	0.271587	2.15102	0.109417	1.72161	0.0349205	1.89816	0.155832	1.94545	0.0166666
	FA 22:5	1.35408	0.257675	1.68439	0.00934407	1.42048	0.0196885	1.33223	0.247691	1.4661	0.0130977
	FA 22:6	1.46005	0.276576	1.84809	0.0217279	1.53942	0.0258766	1.51204	0.194064	1.51669	0.0174053
	FA 24:0	1.24342	0.100656	2.51765	0.129158	1.5381	0.0241933	1.80555	0.0318853	1.5933	0.00199512
	FA 24:2	1.35464	0.0217317	1.84848	0.129663	1.58217	0.090271	1.74035	0.0596458	1.65529	0.016146
	LPC 18:2	1.00611	0.952356	1.64878	0.0340183	1.14991	0.280439	1.15104	0.275838	1.55784	0.0123701
	LPC 20:4	1.14966	0.216043	1.43173	0.040754	1.17578	0.0444537	0.940025	0.643537	1.38308	0.00657252
	LPE 18:2	1.11192	0.444251	1.59321	0.0214844	1.35015	0.0443782	1.4265	0.187381	1.70041	0.0135771
	LPE 22:6	1.33897	0.0506767	2.24197	0.121804	1.27781	0.0180231	1.09883	0.46861	2.87736	0.00881182
	MG 22:6	1.21845	0.430687	1.4429	0.00730005	1.16404	0.113202	1.02229	0.916031	0.928785	0.413552
	NAE 20:5	1.37539	0.345206	1.7625	0.0223098	1.49876	0.0201561	1.49821	0.230464	1.48627	0.0109319
	PC 34:2|PC 16:0_18:2	1.0942	0.124918	1.13428	0.0772784	1.22779	0.000326369	1.32604	0.00104759	1.18795	2.02595e-05
	PC 34:3	1.41042	0.218428	1.64576	0.0269107	1.86672	0.00723734	1.7041	0.015452	1.35816	0.0274249
	PC 36:3|PC 18:1_18:2	1.07475	0.039505	1.16318	0.0347488	1.20575	1.38192e-05	1.2201	0.00110823	1.16427	0.000203338
	PC 36:7	1.23327	0.368524	0.811294	0.281089	1.4564	0.00956572	1.34284	0.291114	1.53267	0.0160794
	PC 37:2|PC 19:0_18:2	1.05585	0.58949	1.04448	0.667097	0.928432	0.0916131	1.12685	0.0360423	0.953081	0.551329
	PC 37:4|PC 17:0_20:4	1.03402	0.740479	1.12367	0.0906263	1.13425	0.0404831	1.01093	0.720763	1.05093	0.284177
	PC 38:4|PC 18:0_20:4	1.01371	0.788818	1.19059	0.156963	1.06496	0.0465545	1.04474	0.271936	1.01136	0.618368
	PC 40:8|PC 18:2_22:6	1.273	0.108584	1.24672	0.012454	1.82775	0.00915332	1.63571	0.00482406	1.20307	0.0413327
	PC 41:3	1.09535	0.424409	1.22513	0.181311	1.06149	0.508727	1.11118	0.0226358	1.17545	0.0193364
	PC 42:10|PC 20:4_22:6	1.03343	0.769863	1.07169	0.318844	1.21323	0.0297971	0.948283	0.477574	1.14863	0.180068
	PC 42:9	1.04404	0.708311	1.14929	0.00418642	1.16918	0.0476986	0.947356	0.412341	1.17563	0.0597941
	PC 52:4	1.17997	0.427813	1.15095	0.567145	1.45281	0.0248007	0.999025	0.995227	1.30428	0.125273
	PC 54:7	1.12014	0.521081	1.36165	0.0105609	1.43654	0.0854929	0.922789	0.233703	1.33838	0.16186
	PC 56:10	1.36504	0.425777	1.44058	0.189451	1.76559	0.0458228	0.634374	0.17041	1.37975	0.208417
	PC 56:7	1.1292	0.555844	1.20065	0.00611317	1.27256	0.0719459	0.86496	0.341543	1.25324	0.0929837
	PC 56:8	1.00799	0.971797	1.08643	0.397264	1.34651	0.0416549	0.851344	0.0752241	1.01967	0.916164
	PC 60:12|PC 30:6_30:6	1.00265	0.988775	1.18098	0.035248	1.21266	0.210506	0.827607	0.0868704	1.07876	0.618278
	PC 62:12	1.11886	0.650447	1.20088	0.133185	1.57792	0.00794439	0.958805	0.796134	1.23605	0.285363
	PC O-40:7	1.06328	0.475845	1.00668	0.869141	1.11955	0.00886256	1.16872	0.134458	0.990995	0.824512
	PE 40:6|PE 18:0_22:6	1.02088	0.803611	1.05469	0.00807148	1.03267	0.237559	0.91321	0.107478	1.05142	0.226654
	PE 40:9|PE 18:3_22:6	1.04195	0.565361	0.949569	0.853986	1.2599	0.0315307	1.27915	0.0317655	1.16837	0.0470858
	PE P-40:8|PE P-18:2_22:6	1.14167	0.424158	1.08173	0.42666	1.09788	0.138483	1.18416	0.0444551	1.13669	0.101082
	PG 40:7|PG 18:1_22:6	1.06251	0.705056	1.11679	0.372028	1.3077	0.0458617	0.864981	0.384885	1.14494	0.481655
	PG 40:8|PG 18:2_22:6	1.20331	0.318638	1.20924	0.167433	1.49033	0.014234	1.209	0.328891	1.11555	0.603296
	PG 42:9|PG 20:3_22:6	1.00684	0.972964	1.01682	0.900826	1.1775	0.00274704	0.841723	0.200212	1.09791	0.640011
	PI 32:0	1.09848	0.506218	1.15139	0.382087	1.6588	0.0457334	1.22297	0.254084	1.15155	0.245062
	PS 32:1|PS 16:0_16:1	1.03824	0.899661	2.49117	0.145109	1.3834	0.00453286	1.09586	0.417259	1.16535	0.488535
	PS 40:6|PS 18:0_22:6	1.00135	0.967882	0.588183	0.281526	1.13644	0.0209013	0.983157	0.683499	0.945189	0.35934
	PS 42:10|PS 20:4_22:6	1.03077	0.829036	0.65832	0.476193	1.30486	0.0305607	1.0139	0.899767	1.08592	0.604423
	SM 34:2;2O|SM 18:2;2O/16:0	0.980497	0.807572	1.03498	0.902512	1.08698	0.0367298	1.00238	0.983389	1.37194	0.27713
	SM 40:0;3O	1.24205	0.173674	1.01492	0.963616	1.43429	0.002104	1.40962	0.0786749	1.38234	0.106589
	SM 42:1;2O	1.10287	0.504064	0.808742	0.68621	1.25707	0.0334049	1.28891	0.179875	1.4743	0.0126751
	SM 42:1;3O	1.13091	0.378449	1.05477	0.796931	1.12392	0.0136327	1.20866	0.0713058	1.24809	0.149695
	TG 62:5|TG 26:1_18:2_18:2	4.62374	0.0115615	1.39584	0.441197	2.5253	0.299088	2.2986	0.258577	4.84964	0.00601116
↓	CE 18:2	0.662273	0.0908824	0.820702	0.537804	0.624497	0.0478097	0.599197	0.0730041	1.80148	0.45639
	Cer 30:1;2O|Cer 18:1;2O/12:0	0.865912	0.296705	1.2728	0.313331	0.861804	0.184099	0.69341	0.0300846	0.938364	0.559798
	CL 78:14|CL 16:1_18:1_22:6_22:6	0.978997	0.742342	0.596473	0.304912	1.02225	0.501644	0.884459	0.0416933	1.11094	0.0376478
	CL 82:17|CL 18:1_20:4_22:6_22:6	0.931372	0.270232	0.527618	0.178753	0.933914	0.111297	0.747918	0.0276005	0.939272	0.214158
	DG 51:6	0.78769	0.14739	0.365831	0.00861546	0.601679	0.0325792	0.365765	0.00679168	1.27766	0.387194
	DG 52:1	1.12525	0.374445	0.98629	0.921335	1.01513	0.749116	0.740572	0.00346876	1.05639	0.626396
	DG 52:2	1.23213	0.135582	1.00675	0.956656	1.05636	0.57046	0.726169	0.0113612	0.91611	0.313258
	FA 15:0	0.901037	0.313639	0.881986	0.0249884	0.912022	0.192564	0.785321	0.00179865	0.669414	0.0017729
	FA 9:0	0.973554	0.838795	0.905467	0.183406	0.916561	0.208812	0.787019	0.0129123	0.82252	0.0358697
	LPC 16:0	0.966038	0.684338	0.96347	0.509194	0.985032	0.638181	0.861088	0.0320343	1.00311	0.96611
	LPC 17:0	0.609631	0.000910232	0.84613	0.316989	0.741372	0.0113887	0.665582	0.0158548	0.790899	0.131607
	LPC 18:0	0.907379	0.208158	0.917503	0.234931	0.971032	0.551669	0.858355	0.036019	0.91361	0.311973
	LPC 18:1	0.991879	0.90267	0.974002	0.607414	0.964524	0.389542	0.849664	0.0197783	0.965715	0.457361
	LPE 20:0	0.9573	0.38593	1.17966	0.235969	0.985169	0.81662	0.78658	0.00918965	1.19275	0.12885
	LPE 20:1	0.956893	0.607453	1.19966	0.322585	0.968381	0.775339	0.646204	0.00529928	1.18311	0.372148
	LPE 22:4	1.03858	0.745194	1.60743	0.178892	1.08183	0.523688	0.744608	0.0207057	1.72012	0.104807
	NAE 17:2	0.713951	0.0705784	0.904124	0.666024	0.517449	0.0142353	0.552336	0.0180803	0.666279	0.0520633
	NAE 22:5	0.796776	0.248638	1.0092	0.965322	0.598963	0.0245562	0.576345	0.0650214	0.707356	0.0557247
	PC 33:0|PC 16:0_17:0	1.04159	0.615219	1.08168	0.390869	0.942654	0.0236111	1.03373	0.416412	0.976855	0.736113
	PC 38:5	0.986418	0.642806	1.06563	0.110942	1.03052	0.132988	0.924679	0.0259636	0.974742	0.152926
	PC 50:6	0.894668	0.480012	0.906158	0.628877	1.09274	0.431309	0.687503	0.00387965	1.03644	0.740635
	PC 58:12	1.02487	0.837418	1.15476	0.136309	1.20011	0.140758	0.778028	0.0271532	1.16649	0.163466
	PC O-29:1	0.941072	0.5234	0.708486	0.171953	0.87881	0.0278159	0.883144	0.231931	0.972733	0.689567
	PC O-38:3	0.974905	0.771305	1.00545	0.950471	0.879811	0.00068338	0.94256	0.0542112	0.882262	0.0412329
	PC O-39:8	0.828288	0.140886	0.89055	0.0933173	0.887686	0.0212187	1.04093	0.635766	0.844073	0.049062
	PC O-41:10	0.916808	0.388622	1.07629	0.775507	0.762218	0.0170743	0.979476	0.864426	0.743548	0.0295925
	PE 19:1	0.862826	0.35482	0.958358	0.745879	0.983576	0.917227	0.575368	0.0115737	0.460994	0.00471489
	PE 23:4	0.850983	0.375004	1.01856	0.867533	1.02682	0.8577	0.659441	0.0166386	0.495611	0.00340004
	PE 32:1|PE 16:0_16:1	0.944736	0.533617	0.933897	0.050819	0.84726	0.019636	0.894259	0.0538116	0.932448	0.128043
	PE 32:2|PE 16:1_16:1	1.00174	0.989331	1.04094	0.748913	0.874779	0.342669	0.793093	0.00702798	1.15704	0.0441317
	PE 34:1|PE 16:0_18:1	0.975545	0.673961	0.943026	0.172931	0.928671	0.0249332	0.864926	0.00812837	1.03182	0.3771
	PE 34:2|PE 16:0_18:2	0.993007	0.927874	0.96606	0.181698	0.878726	0.0171391	0.910018	0.0186405	1.05455	0.0398819
	PE 36:0|PE 18:0_18:0	0.963083	0.674604	0.916115	0.014852	0.939362	0.122663	1.0476	0.491201	0.909482	0.0235151
	PE 36:2|PE 18:1_18:1	0.997854	0.983944	0.963587	0.437267	0.892812	0.0402602	1.07399	0.263653	0.928697	0.241994
	PE 36:3|PE 18:1_18:2	0.981052	0.691779	0.91816	0.0143873	1.00321	0.936007	1.16518	0.00251638	1.02036	0.597044
	PE 36:5|PE 16:1_20:4	0.962876	0.729595	1.09254	0.141762	0.844959	0.0384272	0.709514	0.00553285	1.06195	0.431582
	PE 37:4|PE 17:0_20:4	0.991357	0.934795	1.03955	0.315985	1.00185	0.965745	0.86852	0.0303997	1.03307	0.628126
	PE 38:1|PE 18:0_20:1	0.969757	0.549982	0.92959	0.0406204	0.941751	0.110793	1.10479	0.0365633	0.981925	0.76383
	PE 38:2|PE 18:1_20:1	0.974784	0.819331	0.857736	0.0040244	0.852188	0.0517867	1.0851	0.118325	0.927017	0.496236
	PE 38:5|PE 18:1_20:4	0.96046	0.0351479	0.998969	0.98103	0.930657	0.0544221	0.959464	0.10595	0.977444	0.488845
	PE 39:6|PE 17:0_22:6	1.07068	0.461161	1.08391	0.387183	1.01558	0.428417	0.956129	0.04768	1.05642	0.420195
	PE 40:2|PE 20:1_20:1	0.974135	0.626032	0.864253	0.0340029	0.890386	0.0377276	1.08677	0.016152	0.965708	0.759421
	PE 40:3|PE 18:0_22:3	0.98275	0.857425	0.970943	0.510872	0.906799	0.025743	1.07028	0.198214	0.963514	0.65112
	PE 42:9;2O|PE 22:6_20:3;2O	1.00403	0.942314	1.39409	0.196559	1.00033	0.991194	0.900757	0.011765	1.04831	0.263216
	PE 46:12	0.946659	0.540152	0.910321	0.0689733	0.895519	0.0129677	0.901648	0.138639	0.965187	0.477354
	PE O-37:6|PE O-17:2_20:4	1.01168	0.921093	1.10267	0.323138	1.0077	0.888251	0.848867	0.0336321	1.03119	0.650254
	PE O-39:5|PE O-17:1_22:4	0.958422	0.591372	0.921399	0.0293598	0.975474	0.375952	0.882077	0.0230298	0.990031	0.853807
	PE O-39:5|PE O-19:1_20:4	0.958465	0.591511	0.921399	0.0293598	0.975474	0.375952	0.882077	0.0230298	0.990073	0.854275
	PE P-35:1|PE P-17:0_18:1	1.00027	0.998646	0.821285	0.00483776	0.889459	0.0523827	0.982923	0.801283	0.86617	0.0257151
	PE P-36:1|PE P-18:0_18:1	0.970747	0.701811	0.950436	0.0115133	0.945573	0.129512	1.08054	0.232167	0.94694	0.193383
	PE P-36:6|PE P-14:0_22:6	0.809631	0.111395	0.824088	0.310745	0.827421	0.145773	0.714155	0.0359202	1.07705	0.587508
	PE P-37:1|PE P-17:0_20:1	1.00256	0.983641	0.797113	0.0236888	0.936267	0.0062204	1.03108	0.464403	0.913927	0.131077
	PE P-37:2|PE P-18:1_19:1	0.973962	0.845235	0.804963	0.00216008	0.86619	0.0279635	0.94891	0.37847	0.853533	0.0379043
	PE P-38:2|PE P-18:1_20:1	0.946394	0.435845	0.943915	0.223058	0.916735	0.0386656	1.02201	0.641706	0.903459	0.0155869
	PE P-38:6|PE P-16:0_22:6	0.983344	0.583399	1.04616	0.283987	1.01732	0.550454	0.944862	0.012697	1.01655	0.414439
	PE P-39:2|PE P-18:1_21:1	0.977638	0.858168	0.755838	0.00335083	0.912085	0.00740798	0.964703	0.217464	0.857747	0.0226058
	PE P-40:7|PE P-18:1_22:6	0.986015	0.631753	1.06671	0.196765	1.01438	0.37702	0.961845	0.0215266	0.984848	0.622639
	PE P-42:4|PE P-18:0_24:4	0.93419	0.00765839	0.942673	0.346852	0.986497	0.729269	0.991512	0.793901	0.977804	0.357463
	PE P-42:6|PE P-18:0_24:6	0.902366	0.0135754	0.982595	0.825835	0.954857	0.375053	0.945571	0.452263	0.914241	0.0281054
	PE P-42:6|PE P-20:0_22:6	0.905036	0.0150948	0.984895	0.848841	0.957281	0.397142	0.946973	0.46088	0.916144	0.0305127
	PG 36:4|PG 16:0_20:4	1.09931	0.372898	0.882327	0.515992	1.1426	0.0689667	0.872675	0.0493046	1.14836	0.168871
	PI 36:1	1.00685	0.920966	1.05	0.40643	1.07426	0.216793	0.846139	0.00361924	1.01395	0.78736
	PI 36:4|PI 16:0_20:4	0.905875	0.0701155	0.605469	0.209572	0.969275	0.456781	0.859909	0.0228081	0.946439	0.347359
	PI 38:3	0.886913	0.0240152	0.740597	0.111036	0.923309	0.1172	0.923557	0.175215	0.937786	0.181531
	PI 38:5|PI 18:1_20:4	0.946565	0.131766	0.613046	0.220764	1.00806	0.730025	0.877053	0.0282735	0.943747	0.180229
	PS 35:1|PS 17:0_18:1	0.817106	0.0308881	0.696998	0.095528	0.876046	0.302536	0.89506	0.181184	0.751767	0.0293683
	PS 38:2|PS 18:1_20:1	0.863788	0.50748	0.465715	0.0483628	0.809502	0.0794747	1.20191	0.354711	0.659992	0.0150693
	PS 41:6|PS 19:0_22:6	0.864454	0.036112	0.616874	0.283441	1.12569	0.193056	0.955354	0.452789	0.949401	0.540023
	SM 31:1;2O	0.98662	0.92943	0.877018	0.521947	1.0404	0.696053	0.77711	0.0246504	0.944183	0.498555
	SM 36:2;2O|SM 18:1;2O/18:1	0.892602	0.261875	1.05219	0.109984	1.04058	0.228836	0.845057	0.00275368	1.00394	0.943637
	SM 36:3;2O	0.889069	0.212763	0.885155	0.203331	0.928692	0.184493	0.800369	0.0101951	0.969097	0.548813
	SM 40:2;2O|SM 18:1;2O/22:1	1.01423	0.926848	0.84751	0.0121487	0.801422	0.0227015	1.06398	0.480295	0.879171	0.196973
	SM 41:2;2O|SM 18:1;2O/23:1	1.06884	0.618779	0.868455	0.0880724	0.895029	0.00588936	0.964296	0.0580407	0.957706	0.188642
	SM 41:2;2O|SM 18:2;2O/23:0	1.07161	0.605038	0.868877	0.101016	0.896001	0.00786951	0.963296	0.0747082	0.95865	0.194544
	TG 38:1|TG 8:0_12:0_18:1	0.88143	0.761229	0.267746	0.0380287	0.218785	0.0255654	0.0913452	0.0130832	1.7112	0.280512
	TG 40:2|TG 8:0_14:0_18:2	0.850039	0.785806	0.101286	0.0437215	0.158163	0.0536378	0.0501953	0.0363824	1.54458	0.572805
	TG 42:2|TG 8:0_16:0_18:2	0.780885	0.586638	0.422351	0.12883	0.314929	0.0481187	0.229575	0.0358473	1.12083	0.84723
	TG 44:0|TG 14:0_14:0_16:0	1.42678	0.411249	0.360881	0.0059116	0.561447	0.0647458	0.259735	0.00346754	1.12813	0.807494
	TG 44:2|TG 10:0_16:0_18:2	1.18684	0.701545	0.404834	0.017136	0.40291	0.018255	0.0558544	0.000449085	0.9811	0.957923
	TG 46:1|TG 14:0_16:0_16:1	1.28365	0.553809	0.35197	0.0383392	0.42862	0.0754319	0.209453	0.0186424	0.871575	0.765952
	TG 46:2|TG 12:0_16:0_18:2	1.39433	0.471267	0.282388	0.0214063	0.396062	0.0599894	0.143722	0.00898158	0.74153	0.585403
	TG 46:3|TG 12:0_16:1_18:2	2.09481	0.311816	0.132685	0.00798719	0.32344	0.0312181	0.0928028	0.00671164	0.663837	0.452293
	TG 47:1|TG 15:0_16:0_16:1	1.32237	0.436593	0.425472	0.0309971	0.45366	0.0862305	0.249355	0.00500035	0.785908	0.560149
	TG 47:2|TG 13:0_16:0_18:2	1.08885	0.903548	0.46686	0.118802	0.403151	0.0599789	0.310756	0.0169918	1.01505	0.979744
	TG 48:1|TG 14:0_16:0_18:1	1.22038	0.582724	0.360054	0.0214367	0.427455	0.0362065	0.224212	0.00920567	1.09364	0.844349
	TG 48:2|TG 14:0_16:0_18:2	1.29149	0.519067	0.31835	0.0176536	0.399949	0.0394015	0.206935	0.00919784	0.965667	0.944503
	TG 48:3|TG 14:0_16:1_18:2	1.24331	0.576731	0.312948	0.0114046	0.382493	0.0270537	0.176189	0.00471368	0.718235	0.532037
	TG 49:2|TG 15:0_16:0_18:2	1.37046	0.435603	0.232116	0.00302359	0.436832	0.0182214	0.230651	0.00204561	1.21739	0.717024
	TG 49:3|TG 15:0_16:1_18:2	2.21863	0.205873	0.157941	0.00259342	0.21742	0.00413843	0.06663	0.000268701	1.11135	0.906898
	TG 50:1|TG 16:0_16:0_18:1	1.08779	0.780908	0.485701	0.0241359	0.580173	0.0408282	0.351074	0.00765121	1.29142	0.551396
	TG 50:2|TG 16:0_16:1_18:1	1.17249	0.688623	0.305058	0.0163406	0.413118	0.0268912	0.232877	0.00947685	1.28062	0.667967
	TG 50:3|TG 16:0_16:1_18:2	1.3306	0.516509	0.323195	0.0118958	0.413447	0.0196561	0.238908	0.00614578	0.983033	0.975661
	TG 50:4|TG 16:1_16:1_18:2	1.20368	0.645755	0.314597	0.00104207	0.397335	0.00177126	0.257962	0.000387982	0.834251	0.715859
	TG 51:1|TG 16:0_17:0_18:1	1.01502	0.951715	0.525861	0.0354351	0.659401	0.088786	0.421214	0.00942006	1.18438	0.613613
	TG 51:2|TG 16:0_17:1_18:1	1.14243	0.680943	0.327241	0.0114041	0.52277	0.02042	0.292549	0.00424958	1.21606	0.677271
	TG 51:3|TG 15:0_18:1_18:2	1.16047	0.751148	0.282325	0.0129614	0.400252	0.015495	0.230912	0.00620893	0.963487	0.951664
	TG 51:4|TG 15:0_18:2_18:2	0.984765	0.982476	0.120361	0.0333646	0.274025	0.0726198	0.111573	0.0318933	0.842829	0.811668
	TG 52:1|TG 16:0_18:0_18:1	0.985738	0.949269	0.64731	0.031904	0.717665	0.0432617	0.490264	0.00380794	1.24406	0.494808
	TG 52:2|TG 16:0_18:1_18:1	1.08734	0.818903	0.446992	0.0453702	0.573992	0.0794821	0.353071	0.0206752	1.20388	0.713246
	TG 52:3|TG 16:0_18:1_18:2	1.15495	0.74647	0.34463	0.0291598	0.494503	0.050994	0.31501	0.0190259	1.18145	0.782586
	TG 52:4|TG 16:0_18:2_18:2	1.14248	0.786389	0.309059	0.0156958	0.432139	0.0281042	0.300857	0.0123654	1.1567	0.820104
	TG 52:5|TG 16:1_18:2_18:2	1.14368	0.774104	0.434057	0.0128085	0.496888	0.0189525	0.353917	0.00514172	1.02617	0.964023
	TG 52:6|TG 16:1_18:2_18:3	0.988228	0.958855	0.668178	0.00187576	0.678278	0.00129262	0.460438	0.000188587	0.900233	0.542871
	TG 53:2|TG 16:0_18:1_19:1	0.976848	0.939997	0.46371	0.0303689	0.645397	0.11562	0.351964	0.0122725	1.24032	0.569144
	TG 53:3|TG 17:0_18:1_18:2	1.13537	0.767114	0.295727	0.0351985	0.497133	0.0862776	0.307605	0.0302815	1.07681	0.89878
	TG 53:4|TG 17:1_18:1_18:2	1.04668	0.928618	0.207966	0.0168263	0.321414	0.0239548	0.228445	0.016009	0.965176	0.956354
	TG 53:7|TG 15:0_18:2_20:5	0.902275	0.515866	1.20664	0.0201415	1.04529	0.499022	0.75969	0.00641874	0.987774	0.944734
	TG 54:1|TG 16:0_18:0_20:1	0.945706	0.733428	0.771177	0.0625613	0.780799	0.0306662	0.619515	0.003728	1.13635	0.464051
	TG 54:2|TG 18:0_18:1_18:1	0.977213	0.935796	0.584885	0.0823582	0.660576	0.122554	0.466253	0.0297491	1.16214	0.707001
	TG 54:5|TG 18:1_18:2_18:2	1.03604	0.933213	0.349538	0.0241121	0.434245	0.0243487	0.364892	0.0140218	1.07733	0.902595
	TG 54:6|TG 18:1_18:2_18:3	1.03643	0.881998	0.654681	0.00923995	0.771188	0.0410435	0.541679	0.00164655	1.10345	0.730888
	TG 55:3|TG 18:1_18:1_19:1	0.851115	0.723169	0.279064	0.0311254	0.48658	0.109908	0.239087	0.0194515	1.01118	0.98416
	TG 56:1|TG 16:0_22:0_18:1	0.962589	0.780586	0.847501	0.236589	0.850958	0.013229	0.747551	0.00608138	1.02143	0.66367
	TG 56:10|TG 18:2_18:3_20:5	0.895831	0.688335	0.350483	0.0465932	0.764849	0.412815	0.466466	0.00622319	0.716243	0.506948
	TG 56:2|TG 18:0_18:1_20:1	1.05249	0.74965	0.801072	0.093817	0.821636	0.0683996	0.658964	0.00548964	1.05035	0.730943
	TG 56:4|TG 18:1_20:1_18:2	1.00531	0.984481	0.636675	0.0431432	0.78252	0.177879	0.539528	0.0106106	1.14797	0.678946
	TG 56:5|TG 18:1_18:2_20:2	1.06588	0.740385	0.802202	0.0794619	0.892243	0.352116	0.641548	0.00368407	1.13311	0.608648
	TG 56:6|TG 16:0_18:1_22:5	1.06935	0.675266	0.876734	0.0825042	0.936003	0.409257	0.710767	0.00204962	1.1125	0.418556
	TG 56:8|TG 16:0_18:2_22:6	1.51051	0.189322	0.954107	0.630751	1.32519	0.0285669	1.06826	0.600161	1.19968	0.589396
	TG 57:1|TG 16:0_23:0_18:1	0.616029	0.025979	0.627046	0.00294344	0.631115	0.0148524	0.473096	0.00184951	0.870008	0.418223
	TG 58:1|TG 16:0_24:0_18:1	0.881866	0.378634	0.836819	0.248317	0.808026	0.0352381	0.685119	0.0136325	1.04118	0.635536
	TG 58:10|TG 18:2_18:2_22:6	1.09732	0.587127	1.10566	0.446848	1.03359	0.62596	0.781985	0.0312497	1.09831	0.590782
	TG 58:2|TG 16:0_18:1_24:1	0.963501	0.789214	0.819668	0.11204	0.795384	0.0133473	0.666761	0.00703443	0.93229	0.425121
	TG 58:2|TG 22:0_18:1_18:1	0.941365	0.707098	0.809635	0.163107	0.774641	0.0645766	0.705958	0.0242858	0.957316	0.690571
	TG 58:3|TG 18:1_18:1_22:1	1.0981	0.624425	0.764288	0.154831	0.794226	0.147874	0.655076	0.0363797	0.974444	0.888215
	TG 58:3|TG 22:0_18:1_18:2	1.04197	0.820423	0.819732	0.259236	0.797193	0.0993052	0.631383	0.0201117	0.993905	0.973198
	TG 58:5|TG 18:0_18:1_22:4	1.08443	0.681525	0.853832	0.0613495	0.986962	0.907264	0.635592	0.000716119	1.16	0.363671
	TG 58:6|TG 18:1_18:1_22:4	1.07998	0.578067	0.896555	0.287764	0.959288	0.706146	0.726255	0.00617197	1.14481	0.136519
	TG 59:3|TG 23:0_18:1_18:2	0.864574	0.781396	0.321444	0.00505887	0.69889	0.230159	0.400721	0.0202921	0.88114	0.742289
	TG 60:12|TG 16:0_22:6_22:6	1.06796	0.580283	0.951502	0.604251	0.972401	0.76755	0.756723	0.013327	1.04623	0.5207
	TG 60:2|TG 24:0_18:1_18:1	0.893455	0.665843	0.765737	0.249067	0.774791	0.183084	0.609812	0.0389408	0.933858	0.723034
	TG 60:3|TG 24:0_18:1_18:2	1.05351	0.789011	0.83541	0.362533	0.761912	0.141411	0.626234	0.0444293	1.01331	0.946752
	TG 62:2|TG 26:0_18:1_18:1	0.816475	0.491545	0.677683	0.183427	0.619439	0.0571394	0.510934	0.0250245	0.818661	0.326664
	TG 62:3|TG 18:1_18:1_26:1	1.10335	0.694782	1.09002	0.625477	0.648406	0.0497998	0.736899	0.128589	1.04324	0.870851
	TG 62:3|TG 26:0_18:1_18:2	0.98046	0.93729	0.783297	0.318786	0.678055	0.0652983	0.553242	0.0207609	0.852125	0.59602

## Sheet: BST
Supplementary Table 10. Statistics of differential lipids in each period of fasting in BST.
FC: fold change, the ratio of metabolite level in each period pf fasting to that of Ctrl.
“↑”：Lipid that incresed after short-term fasting.
“↓”：Lipid that decreased after short-term fasting.
#DIV/0!: Lipids that could not detected in Ctrl, bot increased after STF.
	Lipid	F-3h vs. Ctrl		F-6h vs. Ctrl		F-12h vs. Ctrl		F-24h vs. Ctrl		Ref vs. Ctrl
		FC(F-3h/Ctrl)	p value	FC(F-6h/Ctrl)	p value	FC(F-12h/Ctrl)	p value	FC(F-24h/Ctrl)	p value	FC(Ref/Ctrl)	p value
↑	CAR 14:0	0.999002	0.993629	0.924342	0.410779	1.26641	0.0381698	1.26206	0.244927	1.17289	0.167261
	CAR 18:2	1.0371	0.860554	1.23997	0.260965	1.52806	0.0316816	1.62812	0.016187	1.43591	0.110194
	NAE 13:0	0.691615	0.454386	1.23635	0.74893	4.51299	0.253674	3.70819	0.0432169	1.36557	0.506233
	NAE 16:2	0.778525	0.441708	1.73878	0.269146	4.74511	0.257186	1.97832	0.0113608	1.35444	0.386381
	NAE 20:2	1.52092	0.0435248	0.980554	0.941314	1.12275	0.695163	1.21594	0.528289	1.21466	0.207547
	Cer 36:0;2O|Cer 18:0;2O/18:0	1.39949	0.0170829	1.22715	0.0306637	1.0449	0.49008	0.966563	0.712391	1.31281	0.047774
	Cer 38:1;2O|Cer 18:1;2O/20:0	1.19642	0.0745223	1.20699	0.0121394	1.02817	0.667797	1.10104	0.336697	1.20188	0.0966203
	Cer 40:1;2O|Cer 18:1;2O/22:0	1.42169	0.0092893	1.28511	0.0713716	1.11932	0.353861	1.06497	0.720507	1.25234	0.117724
	Cer 45:2;3O|Cer 18:1;2O/27:1;O	1.42503	0.0035544	1.08565	0.473929	1.31911	0.0784012	1.07951	0.588867	1.26453	0.0721679
	CL 72:5|CL 18:1_18:1_18:1_18:2	1.10663	0.290578	1.27009	0.0269418	1.07881	0.437095	1.17816	0.1777	1.25876	0.0417336
	DG 35:3|DG 17:1_18:2	#DIV/0!	0.0339064	#DIV/0!	#DIV/0!	#DIV/0!	0.355918	#DIV/0!	0.355918	#DIV/0!	0.355918
	DG 40:6|DG 18:0_22:6	1.48459	0.0363587	1.1002	0.43355	1.18096	0.349314	1.05224	0.589069	1.27343	0.0780988
	DG 40:7|DG 18:1_22:6	1.31906	0.174476	1.06751	0.593177	1.24723	0.0292526	1.16919	0.234703	0.908885	0.516684
	PC 34:2|PC 16:0_18:2	1.1169	0.0715052	1.07755	0.0260877	1.26104	9.46492e-05	1.38516	0.000515047	1.1296	0.0147565
	PC 34:3	1.3181	0.231683	1.18039	0.141606	1.5214	0.00688167	1.64115	0.0152562	1.26629	0.14104
	PC 35:0	1.04324	0.202167	1.00032	0.990696	1.08519	0.0087649	1.03346	0.522833	0.972474	0.537823
	PC 36:3|PC 18:1_18:2	1.06212	0.0607306	1.05099	0.0941738	1.15596	0.00158911	1.21916	0.00459491	1.10142	0.0107173
	PC 39:2	1.07735	0.395074	0.996878	0.90216	1.07764	0.0308957	1.00504	0.93824	0.958907	0.623124
	PC 40:2|PC 20:1_20:1	0.983313	0.720301	0.971495	0.466126	1.08769	0.0402169	1.02633	0.753948	1.00643	0.922226
	PC 40:8|PC 18:2_22:6	1.27351	0.0916211	1.25909	0.081956	1.56309	0.00728618	1.78822	0.00184798	1.32813	0.112999
	PC 41:3	1.1478	0.302771	1.22352	0.00634373	1.14833	0.0212986	1.13867	0.207757	1.08247	0.255394
	PC 43:5|PC 23:1_20:4	1.06968	0.30019	1.12103	0.0401393	1.05697	0.322501	0.944496	0.262156	1.04435	0.593125
	PC 44:7	1.30739	0.0659788	1.30779	0.0255334	1.27895	0.114115	1.23051	0.0270401	1.01759	0.860008
	PC O-34:0	1.07248	0.0494552	1.02076	0.56053	0.961587	0.309769	0.945362	0.310601	1.17295	0.16603
	PC O-40:4	1.03059	0.799518	1.00844	0.859975	1.12331	0.018337	1.03636	0.662097	0.854076	0.141658
	PE 36:3|PE 18:1_18:2	1.05608	0.539154	1.05424	0.565934	1.16323	0.0975655	1.27159	0.0445703	0.996329	0.974731
	PE 40:9|PE 18:3_22:6	1.16705	0.033804	1.19246	0.0319101	1.26286	0.0267392	1.35036	0.039382	1.29272	0.0184536
	PE P-40:8|PE P-18:2_22:6	1.0915	0.581835	1.05019	0.521257	1.22732	0.0261495	1.23651	0.0510611	1.1777	0.137161
	PI 40:3	0.904051	0.630685	0.843161	0.383119	0.764036	0.252982	1.50228	0.0372351	0.873966	0.510716
	PS 40:6|PS 18:0_22:6	0.987747	0.758419	1.0925	0.0143959	0.98634	0.751988	1.03073	0.579441	1.00892	0.8737
	FA 18:2	1.22029	0.468498	0.918373	0.544037	1.20643	0.212118	1.62629	0.0146872	1.21852	0.116553
	LPE 18:2	1.12117	0.539915	0.990995	0.94068	1.34364	0.0329204	1.29045	0.0832542	1.57166	0.00595201
↓	LPE 20:1	0.884692	0.347374	0.898338	0.426253	0.877214	0.350828	0.638254	0.013592	1.01321	0.933421
	LPE 22:4	0.894065	0.318285	0.925426	0.41006	0.868537	0.161102	0.693918	0.00617326	1.4183	0.0559658
	LPE O-26:7	0.913679	0.036566	0.961091	0.299216	0.928969	0.238967	0.954458	0.289452	0.905039	0.0379663
	LPC 14:0	0.928966	0.00559236	0.960905	0.034585	0.927538	0.00556552	0.939249	0.0504438	0.955891	0.0129838
	LPC 16:1	0.798936	0.0401129	0.931484	0.397755	0.85901	0.137996	0.718811	0.00506414	0.57175	0.00260744
	PC 28:6	0.743111	0.014079	1.16613	0.120386	0.831289	0.0576871	0.614163	0.00266722	0.721759	0.0125037
	PC 42:4	0.906738	0.0150994	0.986217	0.673123	1.06887	0.0928436	0.963409	0.519983	1.07759	0.287572
	PC 54:8	0.765173	0.174006	0.605421	0.0170768	0.833627	0.288315	0.563636	0.033169	1.58425	0.143562
	PE 19:1	0.802247	0.178594	0.895906	0.510564	0.882973	0.423089	0.607934	0.0281165	0.423931	0.00507285
	PE 21:1	0.814035	0.184867	0.8972	0.490291	0.907181	0.475303	0.625068	0.0271024	0.480331	0.00624049
	PE 21:3	0.841806	0.114014	0.966609	0.732044	0.909075	0.359171	0.725459	0.0315687	0.57611	0.00813587
	PE 23:4	0.755602	0.0463972	0.913372	0.468996	0.856608	0.206462	0.637424	0.012656	0.447754	0.00140004
	PE 32:2|PE 16:1_16:1	0.892265	0.501579	0.714304	0.0179011	0.807384	0.0462784	0.783887	0.0996413	1.05564	0.632574
	PE 36:5|PE 16:1_20:4	0.898137	0.430023	0.883662	0.274969	0.780945	0.0591552	0.70634	0.0304851	1.08264	0.553482
	PE P-42:1|PE P-18:1_24:0	1.26321	0.163579	0.838396	0.14494	0.794606	0.0483615	0.990687	0.92075	1.48836	0.0703709
	PI 36:1	0.899941	0.144866	1.00573	0.930727	0.957947	0.496795	0.856616	0.0421099	1.0269	0.744829
	SM 41:0;3O	0.899401	0.00665451	0.973889	0.764475	0.908662	0.115526	0.913671	0.354922	0.838289	0.00477739
	FA 15:0	0.749844	0.0247914	0.856438	0.183871	0.903279	0.262448	0.841579	0.0983415	0.647238	0.0052283
	FA 17:0	0.951301	0.669663	0.988256	0.865913	0.859217	0.0489454	0.907383	0.243865	1.00864	0.884508
	FA 17:1	0.835906	0.126334	0.876555	0.245128	0.84622	0.0611294	0.786248	0.0267841	0.684927	0.00461156
	FA 18:3	0.824001	0.456811	0.60536	0.0212066	0.721976	0.075533	0.917605	0.589095	0.47043	0.00591249
	DG 30:8	0.886528	0.00776781	0.92612	0.090459	0.997789	0.970691	0.926654	0.182445	0.942479	0.153192
	TG 42:0|TG 12:0_14:0_16:0	0.47821	0.0983936	0.306655	0.0383082	0.344787	0.0282257	0.296839	0.0168296	0.205814	0.00680733
	TG 44:0|TG 14:0_14:0_16:0	0.402857	0.0605698	0.0820213	0.00695849	0.238598	0.0159864	0.181568	0.0115236	0.291697	0.0220271
	TG 47:1|TG 15:0_16:0_16:1	0.68261	0.346192	0.216103	0.00961823	0.328021	0.0157437	0.22769	0.018249	0.33029	0.0177209
	TG 49:3|TG 15:0_16:1_18:2	1.32088	0.664901	0.0597555	0.021729	0.125323	0.0295321	0.167681	0.0400292	0.223964	0.0462286
	TG 50:7|TG 12:0_16:1_22:6	1.04372	0.916694	0.483992	0.0493128	0.652493	0.0382668	0.786322	0.348024	0.683645	0.0690848
	TG 60:14|TG 18:3_20:5_22:6	1.20335	0.556346	0.885993	0.531397	0.404329	0.0137866	1.06704	0.892085	1.83962	0.0250021

## Sheet: HYT
Supplementary Table 11. Statistics of differential lipids in each period of fasting in HYT.
FC: fold change, the ratio of metabolite level in each period pf fasting to that of Ctrl.
“↑”：Lipid that incresed after short-term fasting.
“↓”：Lipid that decreased after short-term fasting.
#DIV/0!: Lipids that could not detected in Ctrl, bot increased after STF.
	Lipid	F-3h vs. Ctrl		F-6h vs. Ctrl		F-12h vs. Ctrl		F-24h vs. Ctrl		Ref vs. Ctrl
		FC(F-3h/Ctrl)	p value	FC(F-6h/Ctrl)	p value	FC(F-12h/Ctrl)	p value	FC(F-24h/Ctrl)	p value	FC(Ref/Ctrl)	p value
↑	CAR 18:2	1.20266	0.0541711	1.49188	0.0291528	1.63318	0.0369457	1.81798	0.0104578	1.01078	0.902501
	CAR 20:4	1.55267	0.0607446	1.17996	0.182825	1.26707	0.197849	1.53133	0.00863607	1.31707	0.142511
	CE 22:5	#DIV/0!	#DIV/0!	#DIV/0!	#DIV/0!	#DIV/0!	0.0261085	#DIV/0!	0.355918	#DIV/0!	#DIV/0!
	Cer 42:2;2O|Cer 18:1;2O/24:1	1.22437	0.0685779	1.3343	0.0989327	1.3481	0.0337589	1.33135	0.0409651	1.13332	0.193297
	Cer 45:2;3O|Cer 18:1;2O/27:1;O	1.19924	0.258742	1.22007	0.253469	1.42519	0.0316264	1.34053	0.128032	1.18191	0.277192
	CL 72:5|CL 18:1_18:1_18:1_18:2	0.901184	0.476197	0.51828	0.157536	1.01513	0.835572	1.20249	0.00356634	1.12491	0.00806173
	DG 27:5	0.995916	0.972187	1.90077	0.0794584	1.39003	0.125933	1.2145	0.0468162	1.47671	8.98311e-06
	DG 32:0|DG 16:0_16:0	1.72686	0.0976487	1.82192	0.0337894	1.72154	0.0249335	1.46517	0.00837739	1.27913	0.0938014
	DG 33:2|DG 15:0_18:2	0.39085	0.0489486	1.99585	0.239338	1.82201	0.0225357	1.0745	0.852388	0.754187	0.31541
	DG 34:0|DG 16:0_18:0	1.43022	0.0366696	1.97702	0.0469874	1.53736	0.00609624	1.63809	0.00111251	1.29596	0.0842837
	DG 34:1|DG 16:0_18:1	1.67659	0.0666815	1.76955	0.0444443	1.66514	0.00259404	1.55676	0.00497028	1.25987	0.0683087
	DG 34:2|DG 16:0_18:2	2.02663	0.19935	2.12272	0.0959541	2.53987	0.0458645	2.39731	0.000977297	1.1649	0.39893
	DG 35:1|DG 17:0_18:1	1.63343	0.0784469	1.38682	0.326505	2.39672	0.0102373	2.18045	0.0187207	1.27441	0.343245
	DG 36:0|DG 16:0_20:0	1.04235	0.761581	1.73502	0.0948746	1.7254	0.00782074	1.7348	0.000934277	1.20234	0.43635
	DG 36:1|DG 18:0_18:1	1.54456	0.0235228	2.11751	0.0596821	2.03684	0.00179613	2.19981	0.0102932	1.42609	0.0860814
	DG 36:2|DG 18:1_18:1	1.21707	0.124297	1.42295	0.110466	1.22061	0.00137317	1.29206	0.00227129	1.17553	0.115555
	DG 36:3|DG 18:1_18:2	1.32003	0.0271494	1.15911	0.119949	1.22456	0.083088	1.19048	0.0635345	1.06865	0.396976
	DG 36:4|DG 16:0_20:4	1.46605	0.00425655	1.5359	0.10209	1.31772	0.0422577	1.05512	0.602525	1.19306	0.183771
	DG 38:1|DG 18:0_20:1	1.43783	0.0506932	2.12624	0.0643951	1.99082	0.000497075	2.16583	0.015552	1.37729	0.233845
	DG 38:2|DG 18:1_20:1	1.34383	0.0607516	1.80991	0.0765856	1.76324	0.00180591	1.76135	0.0635317	1.23893	0.212103
	DG 38:3|DG 20:1_18:2	1.51754	0.0247054	1.3888	0.206687	1.40885	0.124634	1.53152	0.106096	1.41414	0.128463
	DG 38:4|DG 18:1_20:3	1.63873	0.0124657	1.51119	0.138129	1.40269	0.0823728	1.55923	0.0679247	1.38954	0.128794
	DG 38:5|DG 18:1_20:4	1.7135	0.0124787	1.76818	0.100584	1.72572	0.00200995	1.67065	0.00167572	1.32078	0.130874
	DG 38:6|DG 16:0_22:6	1.47543	0.030128	1.44272	0.0771618	1.22731	0.163004	1.13995	0.144037	1.05928	0.464835
	DG 40:1|DG 22:0_18:1	1.70942	0.174413	2.76994	0.0843141	2.5776	0.0129104	2.6789	0.0376614	1.71559	0.232906
	DG 40:2|DG 18:1_22:1	1.19836	0.612725	1.79742	0.221185	2.06641	0.0253575	1.83613	0.134922	1.20062	0.560716
	DG 40:4|DG 18:0_22:4	1.58611	0.0190699	1.75015	0.0721691	1.79909	0.0120701	1.98008	0.0140586	1.50789	0.104795
	DG 40:4|DG 20:0_20:4	1.58255	0.0209927	1.75894	0.0722799	1.81185	0.0114833	1.99375	0.0134094	1.51947	0.0999405
	DG 40:5|DG 18:1_22:4	1.79278	0.0311287	1.77024	0.130068	1.80568	0.0057416	1.9035	0.0142928	1.3639	0.108671
	DG 40:6|DG 18:0_22:6	1.5337	0.0324048	1.41878	0.0929306	1.39554	0.0160448	1.41768	0.0217862	1.14613	0.314877
	DG 40:7|DG 18:1_22:6	1.68844	0.0228367	1.84552	0.066224	1.1153	0.692947	1.22348	0.088976	0.973792	0.891106
	DG 42:1|DG 24:0_18:1	1.26118	0.328604	2.05596	0.0949099	1.74067	0.0854219	2.03643	0.00998803	1.15957	0.443016
	DG 42:2|DG 18:1_24:1	1.24055	0.187144	1.28036	0.115925	1.21345	0.171349	1.39901	0.0106585	1.34828	0.171465
	DG O-40:7|DG O-18:1_22:6	1.47497	0.0308793	1.68826	0.0304767	1.5651	0.0233122	1.94279	0.000312374	1.1068	0.412585
	FA 16:0	1.03955	0.741091	1.18922	0.00191069	1.22879	0.112233	1.17406	0.00405687	1.19536	0.0169122
	FA 18:0	1.1163	0.102936	1.1404	0.062271	1.21854	0.00935024	1.31635	0.00120682	1.17464	0.0480105
	FA 18:1	1.33634	0.250293	1.38488	0.0255401	1.71027	0.0239033	1.80663	0.00210283	1.26326	0.233901
	FA 18:2	1.13359	0.589554	1.00633	0.934386	1.61536	0.0285558	1.6835	0.00334365	0.884797	0.298787
	FA 20:0	0.897888	0.337909	1.07551	0.26173	1.20559	0.122747	1.22391	0.0311108	1.17	0.152622
	FA 20:1	1.24899	0.335294	1.5139	0.0082922	1.82724	0.0139338	2.05289	0.00440865	1.34882	0.17158
	FA 20:2	1.37969	0.13597	1.36442	0.042287	1.73321	0.008782	2.07359	0.00145167	1.28269	0.223005
	FA 20:4	1.35262	0.0216956	1.30513	0.0957123	1.38848	0.0138054	1.63289	0.00122853	1.18318	0.127414
	FA 22:0	0.88867	0.448212	1.07391	0.533167	1.46245	0.0699987	1.60502	0.00402306	1.19434	0.379939
	FA 22:1	0.955085	0.708798	1.15341	0.186719	1.49459	0.0180206	1.65678	0.00400691	1.13351	0.419591
	FA 22:2	1.23538	0.379434	1.34243	0.222666	1.49966	0.0604565	1.6885	0.0255141	1.30734	0.218377
	FA 22:3	1.39759	0.0991978	2.00036	0.10067	1.59668	0.0272823	1.77415	0.00235146	1.73074	0.0101902
	FA 22:4	1.36058	0.237595	1.46918	0.0662167	1.85134	0.0208485	2.09258	0.00334727	1.46019	0.125028
	FA 22:5	1.36673	0.168274	1.44918	0.0191408	1.58918	0.0353863	1.60581	0.00561357	1.3747	0.0475561
	FA 22:6	1.37669	0.159997	1.52095	0.0175507	1.62854	0.0610152	1.67548	0.00267021	1.3665	0.0809594
	FA 23:1	1.11361	0.482298	1.36991	0.0696281	1.83149	0.0155628	1.99951	0.00312765	1.33503	0.274732
	FA 24:1	0.985562	0.942183	0.953237	0.822981	1.27906	0.179281	1.488	0.0277468	1.3155	0.118626
	FA 24:2	0.963882	0.920798	1.3747	0.441612	2.06365	0.0367995	2.06329	0.0300282	1.49491	0.207439
	FA 26:1	0.975718	0.91966	1.41289	0.0516743	2.00544	0.0133186	2.23896	0.00222865	1.36738	0.205793
	LPC 22:0	1.06256	0.723018	1.00985	0.938445	1.45156	0.0427185	1.03407	0.802882	0.953349	0.74701
	LPE 18:1	1.35321	0.187249	3.10491	0.143448	1.22407	0.0123345	1.09598	0.08799	2.68034	5.23958e-08
	LPE 20:1	0.903126	0.332398	1.30853	0.0798411	1.32655	0.208237	0.773739	0.0468167	0.759443	0.0322486
	LPE 20:4	1.49888	0.132029	3.88339	0.135804	1.28812	0.0039906	1.26198	0.00378761	3.34059	3.85368e-08
	LPE 22:6	1.70321	0.156506	5.20432	0.14189	1.31123	0.0183664	1.31613	0.0157865	4.27073	4.46663e-08
	MG 16:0	1.48494	0.251235	1.88794	0.0220205	1.89062	0.0809264	2.11968	0.0220358	1.42509	0.360331
	MG 18:1	1.23938	0.455777	1.7399	0.0163638	1.68788	0.141809	1.9168	0.00379529	1.31036	0.199569
	MG 20:4	1.41687	0.171926	1.56429	0.047744	1.10123	0.662872	1.20161	0.46456	1.1544	0.415588
	MG 22:6	1.27455	0.241417	1.67089	0.00858803	1.16006	0.406578	1.10611	0.523206	1.05981	0.47643
	NAE 16:0	1.12017	0.133115	1.27076	0.117364	1.16559	0.129418	1.31732	0.0332882	1.15185	0.231913
	NAE 18:0	1.23308	0.0383641	1.32627	0.124974	1.34136	0.0641767	1.51567	0.0189169	1.25521	0.158744
	NAE 18:3	1.26347	0.0575118	1.27671	0.103958	1.31856	0.0104123	1.51468	0.00237318	1.14344	0.175277
	NAE 20:5	1.32514	0.200451	1.4354	0.0978915	1.57039	0.026437	1.63772	0.00330741	1.27755	0.0955742
	NAE 21:1	1.19311	0.035236	1.06845	0.354373	1.04717	0.720087	1.08608	0.326636	1.16956	0.128293
	NAE 6:0	1.91043	0.253041	3.0795	0.0500697	1.30178	0.342556	1.90097	0.0318726	2.34307	0.00855447
	PC 30:2|PC 12:0_18:2	1.43408	0.0372527	1.27595	0.490925	1.30943	0.219294	1.5531	0.0768378	0.953389	0.820989
	PC 33:2|PC 15:0_18:2	1.51879	0.105463	1.35363	0.378431	1.59889	0.0217045	1.98653	0.0100738	1.23971	0.299512
	PC 34:2|PC 16:0_18:2	1.14162	0.0627176	1.09365	0.134491	1.17623	0.00979677	1.32349	0.00260442	1.16913	0.000408687
	PC 34:3	1.43673	0.0111803	1.30275	0.0763711	1.55174	0.00294025	1.80462	0.00336541	1.17992	0.0428483
	PC 36:3|PC 18:1_18:2	1.1217	0.0349656	1.08644	0.137886	1.08937	0.187213	1.20335	0.0110159	1.13989	0.00219422
	PC 40:8|PC 18:2_22:6	1.24968	0.0529346	1.30246	0.127284	1.28757	0.0457606	1.63114	0.00313886	1.23713	0.00121565
	PC 42:5	1.08376	0.0207096	1.17954	0.187708	1.09577	0.184124	1.0391	0.29973	1.09486	0.0693596
	PC 56:12	2.42934	0.00186948	1.58598	0.446578	1.91837	0.171051	1.98366	0.0900338	2.45237	0.00483152
	PC O-29:1	1.12874	0.0389112	0.961514	0.582909	0.975266	0.731776	1.05343	0.594836	1.15451	0.0162566
	PC O-36:3	1.17372	0.0247699	1.11759	0.329875	1.04284	0.069629	0.978021	0.486261	0.99903	0.990994
	PE 36:3|PE 18:1_18:2	1.18199	0.046723	1.02018	0.444606	1.1362	0.0178266	1.30318	0.00186512	1.13943	0.00011431
	PE 40:9|PE 18:3_22:6	1.06546	0.362368	0.789621	0.297937	1.25014	0.0115503	1.40674	0.0256991	1.02114	0.762143
	PE P-36:6|PE P-14:0_22:6	1.80724	0.0318933	1.4234	0.317523	1.03939	0.820986	0.912006	0.479517	1.46235	0.0142164
	PE P-40:8|PE P-18:2_22:6	1.23191	0.226616	1.03135	0.642887	1.13578	0.0313267	1.10051	0.170129	1.25033	0.00339479
	PG 40:7|PG 18:1_22:6	1.25934	0.134043	0.776375	0.113539	1.25452	0.1725	1.43083	0.0406675	1.01462	0.856262
	PG 40:8|PG 18:2_22:6	1.24636	0.0224415	0.924167	0.571837	1.37475	0.0465788	1.81858	0.00904857	1.10348	0.196608
	PG 42:9|PG 20:3_22:6	1.11132	0.251313	0.968982	0.766344	1.07205	0.564964	1.3032	0.030329	1.10382	0.113777
	PI 32:0	1.21993	0.139289	1.0178	0.907448	1.22483	0.323572	1.55342	0.040166	1.23861	0.037368
	PI 39:6|PI 17:0_22:6	1.14016	0.337389	0.524705	0.191464	0.97251	0.854366	1.23363	0.0449218	1.02136	0.812388
	PS 42:10|PS 20:4_22:6	0.874195	0.38851	0.535615	0.165447	1.04441	0.704125	1.25952	0.0285004	1.00049	0.994834
	TG 55:8|TG 15:0_18:2_22:6	37.5051	0.356546	1.57265	0.302518	1.8204	0.0159819	1.69267	0.165988	0.792675	0.60507
	TG 56:4|TG 18:1_20:1_18:2	1.28924	0.0292834	0.983761	0.892847	0.933477	0.524303	0.931257	0.477648	1.19643	0.050214
	TG 56:5|TG 18:1_18:2_20:2	1.28012	0.00916383	1.01838	0.881689	0.947414	0.556305	1.01205	0.900369	1.19612	0.0288126
	TG 56:8|TG 16:0_18:2_22:6	1.57338	0.0247437	0.999972	0.999855	1.81082	0.0746988	1.73056	0.00490259	1.09871	0.3533
	TG 56:9|TG 16:1_18:2_22:6	3.75267	0.0355363	1.09326	0.876078	6.08851	0.0911258	4.1109	0.00574202	0.863933	0.773843
	TG 58:12|TG 18:2_18:4_22:6	2.48899	0.0625551	2.16127	0.0949889	1.29142	0.699819	2.29825	0.0455885	1.74713	0.216195
	TG 58:5|TG 18:0_18:1_22:4	1.24879	0.0154412	1.04614	0.727346	0.969774	0.800881	1.02619	0.749594	1.27124	0.00233984
	TG 58:6|TG 18:1_18:1_22:4	1.35346	0.00661248	1.11262	0.279641	0.986643	0.889875	1.08244	0.423945	1.29954	0.000864657
	TG 58:9|TG 18:1_18:2_22:6	1.58192	0.00598901	0.8586	0.392654	1.40636	0.0867783	1.49714	0.0324767	1.17264	0.276822
	TG 61:3|TG 25:0_18:1_18:2	1.84366	0.0765479	1.78344	0.309073	1.19092	0.59118	2.09225	0.0392374	1.54592	0.316243
	TG 62:14|TG 18:2_22:6_22:6	4.72365	0.0684452	3.8021	0.0456268	3.42085	0.0592483	3.49255	0.170119	2.02029	0.187159
↓	CE 16:0	0	0.0251003	0	0.0251003	0	0.0251003	0	0.0251003	2.2288	0.145961
	DG 50:0	0.936096	0.730549	0.777317	0.162745	0.636163	0.0473232	0.721894	0.0156765	1.06598	0.53897
	DG 51:6	0.991716	0.927246	0.746411	0.0795289	0.720814	0.145855	0.506746	0.00716605	0.952814	0.772787
	HexCer 44:2;3O|HexCer 18:1;2O/26:1;O	0.876226	0.138131	1.06196	0.654468	0.819765	0.120154	0.815881	0.0419124	0.962852	0.739499
	LPC 17:0	0.904891	0.200924	0.912077	0.120537	0.879804	0.0906236	0.825604	0.0117959	0.900143	0.266213
	NAE 16:2	0.402787	0.0310131	0.863072	0.568022	1.52997	0.472286	1.36868	0.218925	1.0057	0.978031
	NAE 19:0	1.0448	0.754442	0.867575	0.0327164	0.867815	0.0424666	0.961609	0.485611	1.08541	0.246574
	PC 42:0|PC 16:0_26:0	0.724231	0.185728	0.432951	0.0157978	0.92246	0.726241	0.81714	0.401464	0.741107	0.194496
	PC O-41:10	0.987181	0.796762	0.926327	0.0647922	0.917643	0.0466728	0.954433	0.478441	0.953676	0.178476
	PC O-41:9	0.75943	0.0296384	0.9899	0.933174	0.917903	0.684393	0.858048	0.271784	0.761605	0.118113
	PE 19:1	0.889963	0.362724	1.0643	0.670738	1.38808	0.242427	0.725463	0.0219941	0.429131	0.000639323
	PE 21:1	0.855113	0.253825	1.08234	0.607575	1.39709	0.157933	0.700475	0.0344866	0.452424	0.00152809
	PE 32:1|PE 16:0_16:1	1.05541	0.643716	0.845924	0.0772658	0.861537	0.0346323	0.816504	0.0092667	1.06328	0.223938
	PE 32:2|PE 16:1_16:1	1.24356	0.438033	1.23303	0.291279	0.652579	0.0156946	0.576691	0.00836685	1.24749	0.0395061
	PE 34:1|PE 16:0_18:1	1.09332	0.211249	0.877004	0.107371	0.899849	0.0415364	0.908269	0.062519	1.06972	0.00773716
	PE 34:2|PE 16:0_18:2	1.11456	0.358406	0.854381	0.0165239	0.854685	0.00182375	0.87938	0.0332738	1.10925	0.00460821
	PE 35:1|PE 17:0_18:1	0.978318	0.820288	0.734962	0.0267216	1.00624	0.935183	0.831518	0.0163993	0.926651	0.334482
	PE 36:2|PE 18:1_18:1	1.00429	0.914873	0.934255	0.122122	0.973556	0.671805	0.881396	0.0241639	0.912773	0.0249967
	PE 36:5|PE 16:1_20:4	1.09823	0.556478	1.02526	0.791181	0.732052	0.00198888	0.736842	0.00284024	1.15417	0.0184619
	PE 41:1|PE 23:0_18:1	0.874542	0.00595857	0.995092	0.938814	0.978373	0.771797	0.819874	0.00569531	0.944294	0.212168
	PE 42:7|PE 20:1_22:6	0.724855	0.0479868	0.706091	0.118333	0.900388	0.177627	0.905036	0.176114	0.644317	8.18458e-05
	PE P-33:1|PE P-16:0_17:1	1.49046	0.165478	0.587434	0.0282656	1.38836	0.0577261	0.636136	0.191858	1.00136	0.992422
	SM 39:1;2O	0.966274	0.589054	0.712228	0.0407581	0.897581	0.157705	0.93935	0.216339	1.03462	0.614008
	SM 40:0;3O	0.913449	0.508664	0.529029	0.0459482	0.836548	0.255367	0.794063	0.159103	0.980219	0.888859
	SM 40:1;2O	0.942405	0.416636	0.597392	0.0455635	0.917804	0.460566	0.903074	0.187909	1.05657	0.541317
	SM 41:1;2O	0.913337	0.220408	0.607205	0.0341646	0.902038	0.29018	0.921053	0.0331984	1.00512	0.932168
	TG 40:0|TG 12:0_14:0_14:0	0.510843	0.0818549	0.907794	0.732529	0.525145	0.317753	0.664467	0.0219954	0.256978	0.000400876
	TG 40:1|TG 8:0_16:0_16:1	1.87074	0.583148	0.126231	0.0051288	0.243444	0.0275515	0.183927	0.0104677	0.363301	0.0498019
	TG 40:2|TG 8:0_14:0_18:2	3.31013	0.30267	0.494578	0.0757682	0.817632	0.698065	0.226778	0.00217019	0.60699	0.200535
	TG 42:0|TG 12:0_14:0_16:0	1.30416	0.655011	3.64866	0.227726	0.680729	0.184788	0.641918	0.0498875	0.534843	0.134663
	TG 46:1|TG 14:0_16:0_16:1	1.67751	0.452527	1.27932	0.629206	0.564831	0.0386569	0.437293	0.00404039	0.635153	0.0229893
	TG 48:1|TG 14:0_16:0_18:1	1.41254	0.393088	0.72978	0.155848	0.681175	0.0461806	0.5359	0.0111765	0.875409	0.347292
	TG 50:1|TG 16:0_16:0_18:1	1.28184	0.214297	0.810384	0.220682	0.750269	0.0659656	0.68346	0.0320318	1.02797	0.809175
	TG 52:1|TG 16:0_18:0_18:1	1.18922	0.119491	0.869472	0.343144	0.728444	0.0634649	0.707757	0.035475	1.04919	0.649671
	TG 52:6|TG 16:1_18:2_18:3	1.09842	0.457176	0.698483	0.0502517	0.716904	0.0350313	0.727589	0.0228254	1.02443	0.787035
	TG 53:6|TG 17:1_18:2_18:3	0.915853	0.474765	1.35923	0.33214	0.70776	0.0326809	0.661866	0.0311006	0.677831	0.0141053
	TG 55:3|TG 18:1_18:1_19:1	3.45353	0.309786	0.366347	0.0355331	0.675065	0.369192	0.560453	0.162345	0.681307	0.470869
	TG 57:2|TG 16:0_23:0_18:2	1.14565	0.741916	0.433746	0.00463034	0.290955	0.000447862	0.521291	0.135243	0.816232	0.104155
	TG 62:13|TG 18:1_22:6_22:6	1.19991	0.325687	0.722409	0.0553485	0.601162	0.000565325	0.699501	0.00878206	0.855867	0.192298
	TG 62:2|TG 26:0_18:1_18:1	0.564736	0.0239882	0.901616	0.667803	0.602926	0.0964181	0.356822	0.00493344	1.14037	0.684686

## Sheet: COR
Supplementary Table 12. Statistics of differential lipids in each period of fasting in COR.
FC: fold change, the ratio of metabolite level in each period pf fasting to that of Ctrl.
“↑”：Lipid that incresed after short-term fasting.
“↓”：Lipid that decreased after short-term fasting.
	Lipid	F-3h vs. Ctrl		F-6h vs. Ctrl		F-12h vs. Ctrl		F-24h vs. Ctrl		Ref vs. Ctrl
		FC(F-3h/Ctrl)	p value	FC(F-6h/Ctrl)	p value	FC(F-12h/Ctrl)	p value	FC(F-24h/Ctrl)	p value	FC(Ref/Ctrl)	p value
↑	CAR 14:0	1.8665	0.104595	1.78415	0.075075	1.72154	0.0911265	2.11182	0.0238392	0.95508	0.903674
	CAR 16:0	2.70616	0.0219509	1.75772	0.00980213	2.35079	0.00252494	2.51285	0.000339183	1.16789	0.440084
	CAR 16:1	2.3148	0.0410357	1.49544	0.0733497	1.66586	0.0209084	1.64408	0.0234404	0.987277	0.955006
	CAR 18:1	2.70268	0.0319834	1.66459	0.0205913	2.16827	0.00825719	2.50451	0.000101775	1.26442	0.265818
	CAR 18:2	2.48609	0.0677678	1.7092	0.00571908	3.38314	0.000723586	4.33999	0.000208768	0.983429	0.904273
	CAR 20:1	2.32492	0.0275874	2.00959	0.000384826	3.34687	0.0132127	5.17535	0.000691169	1.16926	0.471079
	CAR 20:4	1.82533	0.135346	1.32466	0.198591	1.53309	0.074778	1.43875	0.0211522	0.958781	0.855037
	CE 18:1	1.17317	0.848753	4.46463	0.1552	2.10837	0.0153027	1.83803	0.374794	4.16181	0.0765613
	Cer 36:2;2O|Cer 18:2;2O/18:0	0.809986	0.0845718	1.39401	0.000979186	0.974391	0.744813	1.14938	0.333732	0.895559	0.13582
	Cer 38:2;2O|Cer 18:2;2O/20:0	0.963519	0.837601	1.3668	0.0166717	1.03514	0.749351	1.13917	0.447032	1.01669	0.869443
	Cer 40:2;2O|Cer 18:2;2O/22:0	0.803863	0.351052	0.822798	0.0571013	1.74626	0.00386578	1.63663	0.0450309	1.4269	0.0128674
	Cer 41:2;2O|Cer 17:1;2O/24:1	0.833333	0.209938	1.056	0.658166	1.71728	0.00466388	1.4257	0.00606519	1.19951	0.00179183
	Cer 42:2;2O|Cer 18:1;2O/24:1	1.23288	0.221313	1.51441	0.028533	1.00769	0.945484	1.19433	0.520013	1.00184	0.987776
	Cer 43:1;3O|Cer 18:1;2O/25:0;O	0.9058	0.826686	0.53359	0.296327	4.42869	0.0124603	1.8136	0.152966	2.29812	0.0705989
	Cer 43:2;3O|Cer 18:1;2O/25:1;O	1.13277	0.704213	0.920139	0.277029	1.50262	0.157748	1.67562	0.0462666	1.78494	0.000106232
	DG 33:2|DG 15:0_18:2	5.20748	0.0342262	0	0.149634	0	0.149634	0.822705	0.827313	2.63887	0.162718
	DG 38:2|DG 18:1_20:1	1.86281	0.201399	1.79729	0.0356856	1.24815	0.524664	1.1633	0.640974	1.45322	0.242296
	DG 38:6|DG 16:0_22:6	1.31559	0.0271229	1.32916	0.0193657	1.21828	0.144091	1.05765	0.583638	1.06566	0.35993
	DG 40:7|DG 18:1_22:6	1.6744	0.127159	1.4385	0.0245503	1.36832	0.0139224	1.01425	0.952151	1.01463	0.88482
	DG O-40:7|DG O-18:1_22:6	1.1023	0.554521	1.45122	0.0290344	1.51154	0.116893	1.70937	0.0824524	1.02516	0.814956
	FA 12:0	0.916315	0.543071	1.25823	0.0432041	0.853624	0.20831	1.28028	0.0721304	0.916384	0.542709
	FA 13:0	1.07817	0.368025	1.22876	0.142428	0.95851	0.482672	1.27389	0.0141623	0.898468	0.181941
	FA 15:4	1.23037	0.0172306	1.22138	0.187711	0.88932	0.170645	0.955463	0.71231	0.821955	0.0212536
	FA 16:0	1.15582	0.242385	1.33432	0.0135034	0.933373	0.371763	1.03541	0.859933	0.875179	0.0787792
	FA 16:1	1.45904	0.134793	1.51668	0.0147901	0.982659	0.865378	1.37174	0.213735	0.944587	0.511192
	FA 17:1	1.18034	0.105328	1.24717	0.0056634	1.06389	0.269937	1.22074	0.200435	0.985651	0.823731
	FA 18:1	1.36852	0.159776	1.49022	0.0315614	0.967735	0.819394	1.28024	0.423655	0.955414	0.759256
	FA 18:1;O	0.91168	0.169319	1.38909	0.0128827	0.862625	0.147183	1.00829	0.864025	0.799444	0.0213737
	FA 18:2	1.51892	0.0472659	1.41349	0.030286	1.33459	0.0785995	1.87274	0.0300011	1.01493	0.91279
	FA 20:0	1.04469	0.641297	1.4792	0.00811797	1.01098	0.867017	1.23459	0.315672	0.965777	0.755933
	FA 20:1	1.43346	0.0826509	1.72617	0.00936183	1.0544	0.645972	1.39376	0.351214	1.15782	0.388363
	FA 20:2	1.41759	0.119619	1.5637	0.0213153	1.06535	0.613939	1.43586	0.206275	0.98877	0.927209
	FA 22:0	1.06766	0.672086	2.38979	0.0382631	0.958335	0.806236	1.3137	0.312387	1.15465	0.581314
	FA 22:1	1.40936	0.139353	1.90924	0.0148871	1.37108	0.0170028	1.90685	0.0511764	1.60512	0.0734558
	FA 22:2	1.39063	0.0670243	1.96597	0.0212138	1.04065	0.709976	1.7243	0.0608903	1.30166	0.116768
	FA 22:3	1.55556	0.0395595	2.02761	0.101029	0.940387	0.623912	1.32215	0.350536	1.0074	0.955613
	FA 22:4	1.36086	0.169109	1.53727	0.0339788	0.983156	0.903822	1.32334	0.417024	1.00882	0.946058
	FA 22:5	1.41281	0.156821	1.53207	0.0167375	0.964674	0.716666	1.11367	0.641322	0.901272	0.315599
	FA 22:6	1.39335	0.12374	1.59513	0.0203872	0.929691	0.508082	1.0932	0.751757	0.914542	0.464398
	FA 23:1	1.21568	0.384829	2.17309	0.0227381	1.22027	0.123493	1.44078	0.347661	1.30893	0.185968
	FA 24:0	0.899901	0.563047	1.80565	0.0404605	1.26297	0.332294	1.64704	0.0566823	1.38835	0.287042
	FA 24:2	1.06987	0.703612	1.84363	0.0237999	0.848775	0.530283	1.23729	0.442192	0.880153	0.593681
	FA 24:3	1.22114	0.12979	1.30159	0.0326447	1.04448	0.632121	1.07603	0.6879	1.01262	0.905888
	FA 24:6	1.08678	0.454434	1.2166	0.0354197	0.946137	0.361815	1.00153	0.991661	0.991282	0.883714
	FA 26:1	1.47189	0.336815	2.80573	0.0125863	1.50058	0.151843	2.26058	0.111191	2.34522	0.191783
	HexCer 36:1;3O|HexCer 18:1;2O/18:0;O	1.39844	0.469059	1.34807	0.017547	1.14905	0.340472	1.4342	0.140585	1.84827	0.00059866
	HexCer 36:2;3O|HexCer 18:2;2O/18:0;O	1.34693	0.20282	1.33779	0.05601	1.17209	0.106487	1.43014	0.00450065	1.44813	0.0236795
	HexCer 44:2;3O|HexCer 18:1;2O/26:1;O	1.68312	0.164091	0.993672	0.935341	2.34094	0.000117053	1.94891	0.00308655	2.56821	0.00306602
	LPC 18:2	1.127	0.431148	1.68618	0.145414	1.02842	0.708019	1.69845	0.00684031	1.01489	0.909288
	LPC 26:1	2.36842	0.365379	1.99641	0.0330516	1.13292	0.619619	1.16171	0.687611	1.87242	0.0803014
	LPE 20:1	1.16863	0.329474	1.33814	0.0163677	1.14657	0.202189	0.767795	0.141257	0.896109	0.19872
	LPE 20:2	1.08984	0.500629	1.35924	0.0301725	1.05602	0.737165	1.13191	0.419665	0.924251	0.39973
	LPE 22:1	1.36507	0.234103	2.37902	0.0217656	1.12694	0.293258	1.48929	0.231808	0.867764	0.240887
	LPE O-16:2	1.50355	0.0299023	1.13321	0.243979	1.25785	0.135184	1.19037	0.142372	1.02295	0.853696
	MG 16:0	1.74525	0.119298	1.97056	0.0119156	0.930519	0.635386	1.43891	0.478797	0.883399	0.592302
	MG 18:1	1.68462	0.0833857	1.57619	0.0347124	0.916168	0.556856	1.30944	0.443691	0.970333	0.867086
	NAE 17:1	1.70279	0.0672495	2.12448	0.184113	1.35319	0.0427482	1.09893	0.433596	1.18368	0.167221
	NAE 17:2	1.35262	0.0365191	1.37985	0.325827	1.46153	0.0271241	1.49896	0.0210291	1.55267	0.0033031
	NAE 19:0	1.6252	0.0254663	1.11631	0.668355	1.21788	0.374128	1.43023	0.0967492	0.824936	0.336285
	NAE 20:0	1.27847	0.0259217	1.25196	0.366449	1.29301	0.236555	1.52857	0.0328786	1.15746	0.164298
	NAE 20:2	1.8075	0.124777	1.20082	0.61048	2.61167	0.0151691	2.96783	0.00361342	2.55999	0.0117159
	NAE 20:5	1.52435	0.10073	1.61898	0.0140564	0.998925	0.992342	1.21792	0.529978	0.972442	0.830536
	NAE 21:1	1.53917	0.0167317	1.27537	0.283989	1.15801	0.41073	1.27561	0.140753	0.923821	0.563605
	NAE 22:5	1.91217	0.0583084	1.45419	0.260422	2.22473	0.0158815	2.41301	0.00927603	2.39426	0.0212822
	NAE 6:0	1.40138	0.264634	1.8178	0.247184	1.31083	0.109667	2.10003	0.00404855	1.06058	0.747064
	PC 30:0|PC 14:0_16:0	1.07333	0.0262768	1.13717	0.1365	1.00057	0.979378	1.01585	0.464353	1.03307	0.205482
	PC 30:2|PC 12:0_18:2	2.01713	0.0465253	2.10201	0.150782	1.12923	0.765181	1.77746	0.0959783	0.589799	0.340029
	PC 32:2|PC 16:1_16:1	1.43557	0.0598272	1.2372	0.134005	1.11632	0.25218	1.2465	0.0110411	0.97474	0.738532
	PC 33:1	1.27807	0.204831	1.19184	0.0229319	1.04248	0.0494933	1.07609	0.000397741	1.1217	0.00334244
	PC 33:2|PC 15:0_18:2	1.67038	0.123522	1.42218	0.105008	1.81887	0.000739308	2.35966	0.000171979	1.31238	0.129018
	PC 34:2|PC 16:0_18:2	1.09209	0.298798	1.18911	0.0528232	1.29243	0.0152719	1.49758	0.00277155	1.22111	0.0300091
	PC 34:3	1.47296	0.0178786	1.39738	0.0215067	1.49408	0.00342941	1.64529	2.67449e-05	1.03582	0.654805
	PC 35:2	1.24222	0.19716	1.21833	0.00688777	1.09317	0.153085	1.20183	0.00817345	1.17225	0.0328828
	PC 37:2|PC 19:0_18:2	1.15699	0.183522	1.13465	0.0380819	1.10797	0.053017	1.07905	0.225265	1.21438	0.00732459
	PC 37:4|PC 17:0_20:4	1.2182	0.36556	1.20757	0.0418992	1.0031	0.92253	1.06049	0.153722	1.0574	0.19408
	PC 38:2|PC 18:1_20:1	1.11802	0.277144	1.16978	0.00105543	1.06298	0.0145099	1.06909	0.155704	1.20121	0.00500824
	PC 39:6	1.21737	0.225844	1.18032	0.00605993	1.05006	0.307995	1.01416	0.663766	1.17064	0.0186281
	PC 40:7	1.06443	0.0360405	1.157	0.0634369	1.04364	0.00138617	1.05187	0.00574107	1.0519	6.75513e-06
	PC 40:8|PC 18:2_22:6	1.35814	0.0202844	1.2835	0.0685577	1.41805	0.0132382	1.62051	0.00021378	1.03183	0.730979
	PC 41:6	1.082	0.0228072	0.978031	0.884918	1.12681	0.144464	0.946572	0.504094	1.14582	0.194575
	PC 41:7	1.29376	0.108374	1.1739	0.0292934	1.08689	0.291312	1.27708	0.000604866	1.24965	0.0841982
	PC 42:5	1.07944	0.127526	1.14174	0.0401843	1.10542	0.0548125	1.04487	0.216755	1.09388	0.0570757
	PC 42:7-1	0.944364	0.490628	1.1707	0.046842	1.0394	0.531986	1.04107	0.626316	1.06941	0.399378
	PC 46:4|PC 26:0_20:4	2.85978	0.047025	5.12366	0.00220979	3.05614	0.0804299	4.43569	0.0185661	4.03081	0.0731042
	PC O-30:0	1.01472	0.828677	1.17765	0.0329931	0.988215	0.800171	0.952039	0.339334	1.04404	0.415681
	PC O-30:1	1.14399	0.403089	1.27553	0.0359172	1.02354	0.807395	1.00746	0.911836	1.17541	0.131939
	PC O-36:3	1.20651	0.137419	1.33677	0.00335245	1.03053	0.54971	1.12096	0.251604	1.16252	0.0135938
	PC O-40:4	1.07112	0.25735	0.938174	0.329126	1.46737	0.000426397	1.28071	0.143921	1.18002	0.0127144
	PC O-41:1	9.0897	0.0700387	4.23536	0.120267	5.23266	0.0151036	3.27823	0.345349	8.10244	0.0744093
	PE 21:1	1.09313	0.706431	1.68311	0.011317	1.21688	0.237139	0.875745	0.658837	0.729212	0.0737511
	PE 34:3|PE 16:1_18:2	1.41347	0.163106	1.37107	0.129213	1.14531	0.395358	1.35074	0.0295344	1.06751	0.582573
	PE 35:1|PE 17:0_18:1	1.277	0.057254	1.2404	0.155921	1.298	0.0156951	1.33596	0.0181189	1.26272	0.0707381
	PE 37:2|PE 18:1_19:1	1.59541	0.0257771	1.45383	0.0448571	1.01943	0.879182	1.00463	0.978288	1.24365	0.109081
	PE 40:9|PE 18:3_22:6	1.39241	0.0606673	1.22693	0.0919623	1.29047	0.0693642	1.49651	0.00106528	1.01479	0.895344
	PE 41:1|PE 23:0_18:1	1.64674	0.210246	1.29029	0.423804	2.24012	0.0548608	2.30854	0.0128187	2.6336	0.00851541
	PE 42:7|PE 20:1_22:6	1.03502	0.861088	0.827507	0.0915153	1.30725	0.0207704	1.3541	0.00183139	1.45346	0.000836634
	PE P-33:1|PE P-16:0_17:1	3.39359	0.0300302	2.2176	0.101836	1.89234	0.0178411	1.59884	0.279982	2.16273	0.134854
	PE P-36:2|PE P-18:1_18:1	1.38171	0.405044	1.06623	0.630436	1.163	0.0106496	1.20106	0.0551626	1.51638	0.000815128
	PE P-38:6|PE P-16:0_22:6	1.0206	0.705466	1.09019	0.0447281	1.00704	0.858366	0.994166	0.877458	1.07193	0.0858893
	PE P-40:1|PE P-18:0_22:1	1.4698	0.333075	0.93367	0.673121	1.50001	0.0348406	1.46593	0.0667835	2.06538	0.00770691
	PE P-40:8|PE P-18:2_22:6	1.05856	0.628946	1.20103	0.00182011	1.07418	0.117546	1.05844	0.240263	1.09778	0.0161539
	PI 32:0	1.64072	0.130006	1.03649	0.770342	1.53987	0.0457816	1.41997	0.0102946	0.826738	0.226833
	PI 37:4	1.18306	0.384275	1.46332	0.0279925	1.0525	0.588968	1.30361	0.130679	1.01971	0.848088
	PS 35:1|PS 17:0_18:1	1.51245	0.05438	1.95209	0.167802	1.31158	0.0233807	1.38226	0.0456896	1.35487	0.0176167
	PS 36:2|PS 18:1_18:1	0.957589	0.699562	0.667763	0.156951	1.1406	0.0405826	1.18231	0.01671	1.18161	0.0186948
	PS 40:6|PS 18:0_22:6	0.857761	0.0662248	0.533936	0.112072	1.04127	0.154561	1.05556	0.0235032	1.04882	0.0562545
	TG 40:0|TG 12:0_14:0_14:0	1.62471	0.0315215	4.84775	0.0535556	2.54113	0.00655306	5.27474	0.328957	2.03717	0.126845
	TG 42:4|TG 8:0_16:2_18:2	4.95713	0.302866	2.65868	0.472724	21.944	0.000126262	11.8463	0.0705965	2.78988	0.467821
	TG 48:5|TG 12:0_18:2_18:3	1.28709	0.25434	1.56452	0.044493	1.02013	0.807639	0.874368	0.100933	0.782829	0.43744
	TG 60:6|TG 18:1_18:1_24:4	3.49028	0.0331779	1.28436	0.622141	1.15771	0.778209	0.89684	0.830993	0.716701	0.54561
	TG 62:2|TG 26:0_18:1_18:1	4.045	0.0346516	2.32688	0.0354398	2.74954	0.0512184	2.75311	0.234211	2.90233	0.00100507
↓	Cer 30:1;2O|Cer 18:1;2O/12:0	0.55236	0.0158794	1.12468	0.533362	1.052	0.703776	0.579435	0.0144043	0.623577	0.0226914
	DG 36:4|DG 16:0_20:4	0.866974	0.348807	1.00413	0.963256	1.07567	0.498619	0.583366	0.00526532	1.01417	0.907416
	DG 50:0	0.927377	0.660598	0.53914	0.00413082	0.811962	0.294106	0.612324	0.0277457	0.769369	0.124454
	DG 51:6	0.880246	0.344917	0.829984	0.266786	0.698554	0.0580301	0.446842	0.00458289	0.731758	0.039676
	DG 52:0	0.924201	0.814591	0.44458	0.0416766	0.944655	0.856054	0.694178	0.232462	1.0022	0.992373
	FA 20:5	0.971847	0.751584	1.03939	0.521916	0.835274	0.0297318	0.837582	0.138109	0.709252	0.000750875
	LPC 16:1	0.873916	0.2778	0.926041	0.507308	1.02648	0.768727	0.763327	0.0291169	0.846349	0.0976188
	LPE 22:4	1.16409	0.145605	1.29878	0.128262	0.988387	0.907959	0.781133	0.016582	0.864073	0.0852934
	LPE 22:5	1.82304	0.0937321	1.77508	0.162569	0.73564	0.0568073	0.684119	0.0253076	0.836645	0.185195
	LPG 22:6	1.22448	0.28046	0.952311	0.82489	0.961834	0.78285	0.62248	0.0424738	1.02235	0.734055
	PE 34:4|PE 16:1_18:3	1.76326	0.308289	1.44906	0.34364	0.471988	0.118993	0.294198	0.0467115	0.376097	0.065681
	PE 36:5|PE 16:1_20:4	1.11708	0.400317	1.18194	0.454578	0.740386	0.0212623	0.662731	0.0089415	0.878391	0.199807
	PE 36:6|PE 14:0_22:6	1.30008	0.162221	1.43436	0.222408	0.834729	0.172487	0.738935	0.0421405	0.821144	0.12723
	PE 38:7|PE 16:1_22:6	1.18919	0.177486	1.17671	0.339472	0.884339	0.199558	0.810282	0.0432931	0.88329	0.168933
	PE 42:9;2O|PE 22:6_20:3;2O	0.960078	0.26188	1.11662	0.324903	0.946883	0.0882544	0.885389	0.00333261	0.92631	0.0844715
	PE P-42:4|PE P-18:0_24:4	0.989658	0.843382	0.887368	0.0497415	1.09173	0.497542	1.06832	0.254572	1.10514	0.317164
	PI 40:3	0.985717	0.920727	0.973074	0.872718	0.591059	0.0130185	1.03668	0.756861	0.493097	0.00453846
	PS 32:1|PS 16:0_16:1	0.913783	0.693532	0.705666	0.324676	0.765365	0.022027	0.925905	0.531184	0.859507	0.290533
	SM 33:1;2O|SM 17:1;2O/16:0	0.922726	0.48243	0.856254	0.117038	0.709772	0.0130157	0.751953	0.00125066	0.75638	0.0020401
	SM 34:0;3O	0.956512	0.547989	0.842573	0.0261304	0.88192	0.059143	0.844217	0.0193153	0.889886	0.102231
	SM 34:1;3O	0.838903	0.106105	0.74022	0.016371	0.863525	0.285795	0.899126	0.212607	0.812859	0.0350895
	SM 40:0;3O	0.698916	0.142034	0.538522	0.00555194	1.24034	0.073369	1.0536	0.764853	0.874727	0.197143
	SM 40:1;2O	0.788508	0.151531	0.677283	0.00757827	0.966079	0.694487	1.01755	0.850659	0.850426	0.10967
	SM 41:0;3O	0.732029	0.243532	0.587358	0.00244959	1.18802	0.186873	1.12064	0.615136	0.775157	0.0358986
	SM 41:1;2O	0.868557	0.262198	0.732189	0.0168724	1.09306	0.392744	1.0635	0.412169	1.00838	0.925238
	SM 41:3;2O	0.604566	0.116868	0.674802	0.314396	0.628755	0.228563	0.439329	0.0372932	0.619541	0.199366
	SM 42:1;2O	0.847812	0.175174	0.712621	0.00758797	0.860276	0.121618	0.901727	0.246199	0.836474	0.0846034
	SM 42:3;2O	0.88736	0.24288	0.931619	0.457021	0.744672	0.158599	0.781033	0.0265615	0.658388	0.0039943
	TG 38:1|TG 8:0_12:0_18:1	0.412857	0.119475	0.289512	0.0486762	0.161818	0.0234161	0.18171	0.0281849	0.422164	0.0998612
	TG 40:1|TG 8:0_16:0_16:1	0.411053	0.0372575	0.474185	0.225917	0.239216	0.0334981	0.815771	0.775119	0.443604	0.148412
	TG 47:2|TG 13:0_16:0_18:2	1.22897	0.71255	0.884824	0.816966	0.217196	0.0319812	45.9338	0.354303	0.225068	0.024627
	TG 49:4|TG 13:0_18:2_18:2	0.18601	0.113192	0.155203	0.0952005	0	0.0456455	1.50917	0.713226	0.15745	0.0964033
	TG 50:1|TG 16:0_16:0_18:1	0.968665	0.885575	0.729423	0.28545	0.503003	0.0702037	0.378513	0.0246927	0.638645	0.124842
	TG 50:7|TG 12:0_16:1_22:6	0.173586	0.0105642	0.435623	0.0823414	0.0929268	0.0063939	0.231835	0.0198166	0.294861	0.0369492
	TG 52:1|TG 16:0_18:0_18:1	0.964739	0.861063	0.767682	0.347742	0.571901	0.104729	0.444642	0.0285102	0.737348	0.213498
	TG 53:6|TG 17:1_18:2_18:3	0.981459	0.941325	1.23704	0.360672	0.844548	0.410935	0.654633	0.0433197	0.801638	0.191514
	TG 54:6|TG 18:1_18:2_18:3	1.03687	0.876194	0.803934	0.476188	0.592191	0.138006	0.466669	0.048419	0.675767	0.178891
	TG 57:4|TG 18:1_21:1_18:2	0.64439	0.239853	0.310993	0.0210935	0.438603	0.0641316	0.416003	0.0350697	0.669579	0.411914
	TG 58:12|TG 18:2_18:4_22:6	1.78494	0.215376	1.55229	0.325288	0.730353	0.485463	0.38514	0.0402244	0.809205	0.488682
	TG 59:1|TG 16:0_25:0_18:1	1.51153	0.314313	1.06072	0.876176	0.548382	0.0188302	1.12687	0.698309	0.86383	0.688985
	TG 59:11|TG 16:0_21:5_22:6	0.186525	0.0760212	0.194511	0.0790026	0.172309	0.0713184	0.0593631	0.0435495	0.0619246	0.0441309
	TG 60:14|TG 18:3_20:5_22:6	0.834951	0.643581	0.271362	0.0197521	0.484712	0.122856	0.456515	0.0827378	0.430976	0.0641163
	TG 70:5|TG 34:1_18:2_18:2	1.02671	0.899902	0.264722	0.00637798	0.436304	0.0875846	0.592285	0.137499	1.05314	0.885288

## Sheet: HIP
Supplementary Table 13. Statistics of differential lipids in each period of fasting in HIP.
FC: fold change, the ratio of metabolite level in each period pf fasting to that of Ctrl.
“↑”：Lipid that incresed after short-term fasting.
“↓”：Lipid that decreased after short-term fasting.
	Lipid	F-3h vs. Ctrl		F-6h vs. Ctrl		F-12h vs. Ctrl		F-24h vs. Ctrl		Ref vs. Ctrl
		FC(F-3h/Ctrl)	p value	FC(F-6h/Ctrl)	p value	FC(F-12h/Ctrl)	p value	FC(F-24h/Ctrl)	p value	FC(Ref/Ctrl)	p value
↑	CAR 16:0	1.45254	0.0756011	1.49766	0.0479555	1.64237	0.051644	1.2418	0.258242	1.08939	0.722518
	CAR 16:1	1.42243	0.0412678	1.57354	0.0248241	1.4788	0.106621	0.976005	0.880185	1.09897	0.615291
	CAR 18:1	1.54031	0.0627591	1.56545	0.0472927	1.6015	0.0815673	1.19593	0.372435	1.14544	0.600917
	CAR 18:2	1.656	0.0270488	1.43429	0.0430238	2.13512	0.00300134	2.32215	0.0407987	1.04139	0.878616
	CAR 20:1	1.37243	0.274634	1.29172	0.323029	2.14906	0.0835119	1.76856	0.0363217	1.3702	0.470767
	CE 18:3	2.12585	0.317486	2.14143	0.0197992	1.80332	0.0799835	1.88712	0.390296	1.88728	0.030994
	CE 20:3	0.437724	0.282659	1.9866	0.304717	3.97858	0.00200273	3.68186	0.132918	1.86164	0.493889
	CE 22:6	1.46572	0.13347	1.71863	0.0468978	1.49747	0.0349196	1.55439	0.0545099	1.13979	0.658198
	Cer 30:1;2O|Cer 18:1;2O/12:0	0.862543	0.497788	1.90077	0.00150746	0.968442	0.883503	0.835026	0.375191	1.00849	0.967697
	DG 30:0|DG 14:0_16:0	0.608821	0.211211	1.40143	0.463674	2.34787	0.175617	1.91935	0.0458445	1.5609	0.398674
	DG 32:0|DG 16:0_16:0	1.27617	0.204886	1.48947	0.00751933	1.46419	0.151379	1.35139	0.0137468	1.1584	0.577806
	DG 32:1|DG 16:0_16:1	3.1529	0.0173366	2.60742	0.171787	2.10017	0.0650722	1.12376	0.79878	1.48092	0.547113
	DG 34:0|DG 16:0_18:0	1.1636	0.46487	1.50878	0.0245485	1.51948	0.222658	1.1052	0.550209	1.1175	0.769121
	DG 34:2|DG 16:0_18:2	1.74149	0.0399554	1.39356	0.256191	2.65872	0.00220524	2.33142	0.0497245	1.57255	0.247643
	DG 35:1|DG 17:0_18:1	1.76169	0.169359	1.80295	0.00923235	1.87204	0.168449	1.19671	0.408574	1.54154	0.315812
	DG 35:2|DG 17:0_18:2	1.07772	0.818879	1.56171	0.00531568	1.11534	0.467289	0.782812	0.0702188	0.655139	0.0482926
	DG 36:0|DG 16:0_20:0	1.35272	0.535086	1.96998	0.0495365	1.58605	0.281889	1.11774	0.729252	1.49497	0.418994
	DG 36:2|DG 18:1_18:1	1.16453	0.434682	1.47461	0.0451962	1.33196	0.155413	1.02268	0.86155	1.17601	0.554293
	DG 36:3|DG 18:1_18:2	1.45686	0.109168	1.29054	0.0131333	1.54781	0.00034669	1.51287	0.018662	1.26939	0.055673
	DG 38:1|DG 18:0_20:1	1.56099	0.389382	2.12187	0.045795	1.63545	0.243102	1.03418	0.922509	1.35471	0.514866
	DG 38:3|DG 20:1_18:2	1.17168	0.558318	1.78024	0.0184908	1.21658	0.476511	0.767318	0.304892	1.41308	0.283291
	DG 38:4|DG 18:1_20:3	1.12952	0.577887	1.71638	0.0175463	1.14799	0.544746	0.695332	0.15778	1.37611	0.270338
	DG 38:5|DG 18:1_20:4	1.1816	0.271585	1.66428	0.016802	1.11472	0.540555	0.943618	0.748104	1.26276	0.22591
	DG 40:1|DG 22:0_18:1	1.53292	0.45591	2.34617	0.0375707	1.65934	0.222494	1.06175	0.86514	1.33875	0.551533
	DG 40:2|DG 18:1_22:1	1.65472	0.336235	2.2807	0.0483039	1.69732	0.242491	1.11324	0.786589	1.49624	0.420669
	DG 41:1|DG 23:0_18:1	1.35126	0.631457	2.62247	0.025461	1.8588	0.192089	0.850336	0.710901	1.13448	0.802932
	DG 48:6	1.02269	0.899197	1.44988	0.0176986	0.914139	0.644889	1.09501	0.53324	1.03559	0.834586
	DG O-40:7|DG O-18:1_22:6	1.23037	0.450129	1.19912	0.333288	2.13557	0.0772151	1.76379	0.00892496	1.34715	0.358808
	FA 14:0	1.0566	0.544516	1.06893	0.284002	1.35015	0.00668912	1.24224	0.141588	1.0143	0.888989
	FA 16:0	1.107	0.465513	1.0938	0.372852	1.4142	0.021182	1.19311	0.0746462	1.06589	0.643165
	FA 16:1	1.19567	0.414785	1.04842	0.75973	1.708	0.0338946	1.43201	0.0477194	0.897229	0.593914
	FA 17:0	1.10674	0.433243	1.00114	0.985505	1.32269	0.0178272	0.989419	0.889372	0.934063	0.371442
	FA 18:1	1.16312	0.4874	1.1487	0.4292	1.65984	0.0495117	1.3887	0.0770624	0.908586	0.6995
	FA 18:2	1.45955	0.0781282	1.22103	0.0865134	2.60521	0.00529821	2.52131	0.00187335	0.935966	0.692608
	FA 19:0	1.0973	0.350667	1.26286	0.011686	1.37683	0.00879258	1.11192	0.184197	1.16335	0.231423
	FA 20:0	1.122	0.570183	1.11132	0.493594	1.56387	0.0177059	1.12571	0.43706	1.02581	0.896971
	FA 20:1	1.33944	0.341388	1.3333	0.257258	1.9069	0.0478968	1.42068	0.157525	1.01194	0.973333
	FA 20:2	1.20505	0.324244	1.22959	0.199453	1.84196	0.0275085	1.58323	0.00959139	1.02101	0.928382
	FA 20:5	1.08066	0.38444	1.12586	0.0265649	1.55958	0.101249	1.23482	0.0644756	0.867351	0.10894
	FA 21:0	0.988749	0.957323	1.17999	0.235998	1.41046	0.0443104	1.20624	0.155951	1.27085	0.409723
	FA 22:0	1.15119	0.699862	1.29094	0.373055	1.88491	0.0394626	1.37806	0.243452	1.14044	0.695035
	FA 22:1	1.31298	0.437	1.39431	0.217265	1.93181	0.0476338	1.25305	0.409017	1.02125	0.953909
	FA 22:2	1.54642	0.167083	1.66332	0.069116	2.10646	0.0277906	1.60718	0.073148	1.19634	0.573929
	FA 22:3	1.40431	0.102905	1.7819	0.0146099	1.75169	0.0649286	1.38242	0.117746	1.15725	0.628899
	FA 23:1	1.22808	0.626784	1.43728	0.226697	1.95831	0.0358081	1.36254	0.282046	0.988137	0.975562
	FA 24:0	1.23898	0.488532	1.49956	0.0924689	1.7731	0.0347931	1.69245	0.043622	1.08358	0.79022
	FA 26:1	1.50842	0.436507	1.72657	0.176044	2.70463	0.0142875	1.98299	0.0820819	0.847658	0.784339
	HexCer 36:2;2O|HexCer 18:2;2O/18:0	1.40913	0.346699	1.58526	0.0499737	1.14837	0.525418	1.1731	0.491811	1.26345	0.320334
	HexCer 42:1;3O|HexCer 18:1;2O/24:0;O	1.25302	0.115648	1.53876	0.0372	1.04674	0.69814	0.960163	0.693976	1.10883	0.396132
	LPC 20:1	1.06398	0.528747	1.29873	0.0388392	1.24371	0.29197	0.980131	0.832517	0.982967	0.917771
	LPE 16:0	1.00502	0.964634	1.23382	0.0117145	0.967763	0.726562	0.87402	0.0568094	1.31182	0.0583803
	LPE 16:1	1.09452	0.709818	1.63419	0.0170062	1.30177	0.15725	0.9614	0.820006	1.76039	0.0205264
	LPE 18:1	1.45828	0.130261	3.32643	0.00136127	1.22315	0.296451	1.01046	0.878145	3.24125	0.0046826
	LPE 18:2	1.17615	0.154009	1.56246	0.00414878	1.27615	0.134368	1.28101	0.0606638	1.82192	0.00843108
	LPE 20:2	1.12254	0.431985	2.07784	0.00482262	1.31002	0.252818	1.13736	0.497758	2.14915	0.0087498
	LPE 20:4	1.20284	0.336963	1.9711	0.000304625	0.905229	0.650623	0.829936	0.109787	2.26386	0.0171387
	LPE 22:1	1.1962	0.47392	2.08091	0.010852	1.2561	0.329243	0.8107	0.36373	1.96556	0.0898745
	LPE 22:3	1.03484	0.775001	2.43922	0.0103929	1.09886	0.481475	0.833439	0.0150278	1.95645	0.00375158
	LPE 22:4	1.00908	0.933593	1.5635	0.00317929	1.22148	0.506819	0.720998	0.0306254	1.73957	0.0235385
	LPE 22:5	1.19068	0.407333	2.23602	0.000147194	0.845268	0.398969	0.711847	0.0148565	2.5456	0.00678129
	LPE 22:6	1.36217	0.193351	2.54645	7.08962e-06	0.863742	0.471851	0.789003	0.0371766	2.83951	0.00842372
	LPE O-20:2	1.2983	0.0822248	1.20559	0.117475	1.40157	0.0400331	1.2325	0.303551	1.09606	0.59225
	MG 20:4	1.26937	0.190401	1.531	0.0290623	1.24243	0.344826	0.807577	0.425991	1.52341	0.246549
	NAE 17:2	1.4662	0.163494	2.12272	0.00618051	1.86006	0.0154618	1.66592	0.0174582	2.44506	0.000478267
	NAE 20:0	1.06083	0.27187	1.30546	0.129201	1.36289	0.00318346	1.39634	0.27252	1.72658	0.0368455
	NAE 21:1	1.08156	0.259895	1.25073	0.0161222	1.15933	0.166388	0.905301	0.134783	1.03973	0.778121
	NAE 6:0	1.25882	0.525966	3.12125	0.00136403	2.38644	0.0442395	2.33625	0.00971332	2.14018	0.0309523
	PC 28:0|PC 14:0_14:0	1.30903	0.0957801	1.50161	0.0136525	1.07278	0.684425	0.928806	0.611636	1.12916	0.518151
	PC 29:0|PC 14:0_15:0	1.37929	0.0928523	1.46561	0.0318497	1.02668	0.865466	0.947335	0.745552	1.08829	0.625325
	PC 32:1|PC 16:0_16:1	1.01937	0.513008	1.08429	0.0404365	0.954895	0.154596	0.908499	0.0503394	0.983256	0.627575
	PC 33:1	1.31277	0.109995	1.23108	0.0280039	1.10671	0.212331	1.0063	0.943695	1.06152	0.510365
	PC 33:2|PC 15:0_18:2	1.53762	0.129529	1.36904	0.218246	1.67433	0.0164982	1.98682	0.0125855	1.36221	0.200115
	PC 34:2|PC 16:0_18:2	1.11611	0.0513461	1.21731	0.00576879	1.27548	0.00191959	1.38623	0.00041875	1.19777	0.0177614
	PC 34:3	1.25265	0.0699506	1.50632	0.0039901	1.55287	0.00318556	1.46998	0.0269797	1.14797	0.305146
	PC 35:0	1.38405	0.0492867	1.37506	0.0827692	1.14633	0.287384	0.984213	0.898508	1.0832	0.596391
	PC 35:1	1.35555	0.00393906	1.40726	0.0879771	1.13992	0.139532	1.08552	0.347133	1.10557	0.220105
	PC 35:2	1.19688	0.0430063	1.24984	0.0806519	1.14627	0.133658	1.14011	0.116605	1.09243	0.268569
	PC 36:3|PC 18:1_18:2	0.994421	0.861136	1.12188	0.0187601	1.06482	0.0783936	1.08364	0.0615773	1.07079	0.116009
	PC 36:4|PC 16:0_20:4	0.940951	0.197313	1.09059	0.0464377	0.930843	0.106169	0.964531	0.282734	1.00997	0.763548
	PC 36:5	0.960105	0.692987	1.18865	0.0370302	0.928634	0.444079	0.812322	0.0591883	0.969013	0.790768
	PC 36:6|PC 14:0_22:6	1.05333	0.678123	1.46068	0.0178273	1.06297	0.61732	0.848924	0.226675	1.10892	0.536458
	PC 36:7	1.34483	0.00818228	1.24375	0.0767635	2.05318	0.103477	1.41023	0.307428	1.3512	0.0194821
	PC 37:2|PC 19:0_18:2	1.47373	0.0214589	1.53744	0.116569	1.20313	0.0858615	1.19637	0.149927	1.17702	0.204531
	PC 37:4|PC 17:0_20:4	1.21146	0.41675	1.18687	0.0224108	1.01961	0.718691	0.992011	0.897455	1.07647	0.273256
	PC 37:6|PC 15:0_22:6	1.31299	0.359987	1.26844	0.0269038	1.19013	0.100509	0.957638	0.701325	1.04069	0.755051
	PC 39:7	1.19033	0.320827	1.44827	0.0118565	1.1665	0.147477	0.945517	0.594076	1.03638	0.776511
	PC 40:8|PC 18:2_22:6	1.07675	0.516632	1.35204	0.0178466	1.50045	0.0192094	1.41302	0.0178209	1.154	0.354929
	PC 42:5	1.11894	0.353529	1.35313	0.0352107	1.11766	0.239582	0.983827	0.864498	1.1724	0.112903
	PC 43:10|PC 21:4_22:6	1.03371	0.824454	1.12123	0.485445	1.34812	0.0252448	1.2541	0.0759158	1.06845	0.61752
	PC 43:5|PC 23:1_20:4	1.25491	0.279355	1.40345	0.0411786	1.19592	0.212983	0.854739	0.375468	1.04817	0.807831
	PC O-34:1	1.13802	0.0365969	1.28179	0.0394817	1.00061	0.989287	0.993329	0.906768	1.09546	0.195262
	PC O-40:7	1.14901	0.13619	1.22936	0.0165309	1.01754	0.76134	0.998857	0.984201	1.08842	0.258498
	PE 35:1|PE 17:0_18:1	1.37141	0.00714576	1.39639	0.0214111	1.12573	0.249474	1.18504	0.098345	1.09125	0.393989
	PE 36:3|PE 18:1_18:2	0.98498	0.753191	1.02946	0.562512	1.10845	0.0544363	1.18408	0.017555	1.07358	0.169475
	PE 37:2|PE 18:1_19:1	1.35762	0.183682	1.78378	0.032126	1.29286	0.295868	1.09095	0.684788	1.32908	0.239944
	PE 37:4|PE 17:0_20:4	1.10384	0.697395	1.19193	0.0224198	0.994061	0.921072	0.903141	0.138412	1.02892	0.740661
	PE 37:6|PE 15:0_22:6	1.15191	0.391028	1.60081	0.0064613	1.09118	0.242532	0.91004	0.370481	1.14264	0.16844
	PE 40:2|PE 20:1_20:1	1.53504	0.0428895	1.201	0.304951	1.06029	0.718391	1.07088	0.559209	1.17869	0.300867
	PE 40:9|PE 18:3_22:6	1.12903	0.305898	0.890589	0.416056	1.38852	0.00407638	1.27723	0.0862512	0.931576	0.453169
	PE 42:9;2O|PE 22:6_20:3;2O	0.96613	0.585601	1.26717	0.0146746	0.923616	0.0920915	0.979816	0.668131	1.04861	0.345711
	PE O-42:2|PE O-18:1_24:1	1.24563	0.0190514	1.09563	0.270108	1.10802	0.336392	1.10951	0.241705	1.00101	0.991731
	PE P-32:1|PE P-18:1_14:0	1.76401	0.117283	1.35493	0.457399	1.00276	0.991414	2.01629	0.0219365	1.42169	0.192815
	PE P-33:1|PE P-16:0_17:1	2.31455	0.00189018	1.76149	0.0760117	1.3148	0.151144	1.55073	0.0703062	1.15157	0.619474
	PE P-35:1|PE P-17:0_18:1	1.51685	0.0313756	1.11288	0.496894	1.18021	0.319973	1.12244	0.494355	1.12483	0.504602
	PE P-35:2|PE P-17:1_18:1	2.15519	0.0402351	1.54996	0.226182	1.35603	0.250566	1.32611	0.314725	1.41496	0.21978
	PE P-37:4|PE P-17:0_20:4	1.2018	0.00744157	1.13364	0.297844	1.09022	0.362032	1.01515	0.855187	1.02185	0.590528
	PE P-38:5|PE P-18:1_20:4	1.01494	0.575369	1.05475	0.0193759	0.941302	0.0047204	1.00219	0.890968	1.04233	0.0818872
	PE P-40:9|PE P-18:3_22:6	1.0675	0.621549	1.78326	0.00465662	0.977799	0.892148	0.759804	0.186229	1.25878	0.302487
	PE P-44:7|PE P-22:1_22:6	1.00205	0.982012	1.22628	0.00206576	1.21823	0.036565	0.97079	0.646904	1.07197	0.448403
	PG 40:8|PG 18:2_22:6	1.02223	0.864392	1.05645	0.762419	1.54693	0.0264569	1.2425	0.211698	0.975583	0.898073
	PI 37:4	1.03831	0.90058	1.65077	0.0160862	1.35637	0.0711239	1.12377	0.655428	1.06469	0.699372
	SM 34:2;3O	1.26206	0.460516	2.20457	0.00377162	1.14865	0.54963	0.933215	0.838678	1.15081	0.714818
	SM 40:7;2O|SM 18:2;2O/22:5	1.06134	0.544698	1.56977	0.0139102	1.07961	0.614807	0.869255	0.254621	1.14946	0.636645
	ST 27:1;O	1.15897	0.416894	2.40175	0.0138752	1.16448	0.507061	0.833996	0.347203	1.23998	0.440712
	TG 45:1|TG 14:0_15:0_16:1	1.41724	0.229237	1.31677	0.570771	3.19533	0.290115	3.70621	0.0451993	1.51035	0.348988
	TG 53:7|TG 15:0_18:2_20:5	0.997818	0.983872	1.38001	0.0408649	1.00861	0.943392	0.833015	0.102667	0.985511	0.954799
	TG 66:2|TG 16:0_18:1_32:1	1.91409	0.27874	1.84703	0.0723757	2.38657	0.294584	2.10862	0.000781621	2.61084	0.304282
↓	CL 68:4|CL 16:1_18:1_16:1_18:1	1.01596	0.944901	0.186716	0.0039325	0.921776	0.257183	0.807818	0.0673677	0.831675	0.0840779
	CL 72:4|CL 18:1_18:1_18:1_18:1	0.928682	0.568201	0.188911	0.00263068	0.975911	0.791921	0.933337	0.401115	0.889317	0.282438
	CL 72:5|CL 18:1_18:1_18:1_18:2	0.907175	0.49532	0.213985	0.00638652	0.9837	0.8374	0.980576	0.815824	0.949209	0.609125
	CL 72:7|CL 18:1_18:2_18:2_18:2	0.933437	0.637398	0.263768	0.00897666	0.950875	0.49658	0.869041	0.188292	0.928644	0.444056
	CL 74:11|CL 36:5_38:6	0.991078	0.953715	0.353792	0.0398392	1.00433	0.967669	0.902294	0.356218	1.05218	0.663953
	CL 74:9|CL 18:1_18:2_18:2_20:4	0.941313	0.598018	0.3121	0.0182122	0.981689	0.799663	0.876892	0.162122	0.957939	0.662232
	CL 76:9|CL 18:1_18:1_18:1_22:6	0.903177	0.247888	0.300576	0.0124247	0.973161	0.665159	0.884129	0.133274	0.890686	0.196794
	CL 78:12|CL 18:1_18:1_20:4_22:6	0.903858	0.371207	0.358319	0.0288267	0.976848	0.79737	0.838554	0.108277	0.928454	0.523786
	CL 78:13|CL 18:1_18:2_20:4_22:6	0.916665	0.509748	0.375554	0.0378235	0.98124	0.843829	0.860829	0.186611	0.984469	0.894246
	CL 78:14|CL 16:1_18:1_22:6_22:6	0.952148	0.682574	0.414933	0.0445401	1.00358	0.95886	0.857912	0.0945394	0.9707	0.753982
	CL 80:14|CL 18:1_18:1_22:6_22:6	0.896772	0.267488	0.397013	0.0348749	1.00583	0.945641	0.820726	0.0616438	0.901407	0.348756
	CL 80:15|CL 18:1_20:4_20:4_22:6	0.903755	0.345291	0.436814	0.0440168	0.984707	0.849794	0.829106	0.0596092	0.938669	0.568606
	CL 82:17|CL 18:1_20:4_22:6_22:6	0.917845	0.373496	0.434023	0.0462411	1.01178	0.888815	0.785545	0.0410268	0.891795	0.36915
	DG 50:0	0.731307	0.00266586	0.74288	0.00343104	0.445162	0.000204826	0.33597	7.57742e-06	0.580013	0.00110758
	DG 51:6	0.784357	0.161127	0.960379	0.7882	0.575971	0.0610573	0.504519	0.0211877	0.897564	0.546375
	DG 52:0	0.747286	0.0945278	0.648088	0.0151511	0.457418	0.00293385	0.283486	0.000786756	0.511594	0.0141416
	DG 52:1	0.909047	0.39815	1.0804	0.576126	0.818864	0.131223	0.591216	0.00778588	0.912409	0.558615
	DG 52:2	1.02368	0.876591	0.994208	0.97434	0.89833	0.502144	0.634606	0.043843	0.809791	0.305264
	HexCer 44:2;3O|HexCer 18:1;2O/26:1;O	1.13631	0.469863	1.77353	0.230745	0.749213	0.0202508	0.939651	0.462262	1.05025	0.602319
	LPC 16:1	0.76109	0.0679992	0.567477	0.00151796	1.15254	0.659742	0.668468	0.0217111	0.516453	0.00355025
	LPG 22:6	0.762929	0.288522	1.07386	0.744253	0.69057	0.302222	0.530189	0.0452925	1.8475	0.291961
	PC 38:5	0.968704	0.52792	1.07718	0.0706273	0.949181	0.249792	0.929675	0.0499525	0.989014	0.743463
	PC 42:8	0.913137	0.105039	0.904573	0.0670713	1.04845	0.492911	0.884607	0.0204335	0.962284	0.481076
	PC 43:9	0.954223	0.712416	0.331019	0.0042933	0.962907	0.767485	0.972213	0.82128	0.806515	0.211017
	PC 50:4	0.86572	0.368562	0.833583	0.268514	0.904482	0.411468	0.6897	0.0363493	0.844901	0.446432
	PC 50:6	1.15366	0.301794	1.19874	0.24373	1.3234	0.0335013	0.777037	0.0496352	1.04028	0.869524
	PC 52:4	0.809638	0.157209	0.832023	0.199461	0.945606	0.505414	0.703646	0.00449258	0.850119	0.254022
	PC 52:6	0.970528	0.811864	1.08181	0.519497	1.04232	0.668137	0.76092	0.0488462	0.935634	0.674345
	PC 52:7	0.915378	0.645775	1.18964	0.387996	1.15498	0.390394	0.502704	0.00433631	0.855559	0.631537
	PC 54:6	0.961151	0.707036	0.971638	0.814919	1.07015	0.524898	0.724588	0.0192128	0.912573	0.588978
	PC 54:7	0.993334	0.954013	1.23533	0.161968	1.07388	0.580217	0.772485	0.0444757	0.970922	0.891414
	PC 54:8	0.92817	0.48761	1.19988	0.1636	1.0499	0.642819	0.758032	0.0297666	0.976789	0.891001
	PC 56:6	0.895427	0.355575	0.939338	0.532918	0.988656	0.914352	0.72252	0.0269242	0.880124	0.372735
	PC 56:9	0.900104	0.236657	1.17485	0.139064	1.05025	0.61235	0.771424	0.0324095	0.920047	0.62117
	PC 58:8	0.885034	0.123392	1.02509	0.772278	1.0292	0.801607	0.79116	0.0157127	0.951856	0.776247
	PC 58:9	0.910739	0.391709	1.05833	0.628005	1.08949	0.467101	0.77433	0.0295903	0.94067	0.742558
	PC 60:12|PC 30:6_30:6	0.903777	0.298482	1.23847	0.0687262	0.988246	0.915067	0.737428	0.01731	0.903142	0.567465
	PC O-30:1	1.22934	0.0418929	1.13304	0.121718	0.909476	0.282587	0.950222	0.251444	1.14131	0.0141819
	PC O-34:0	0.984067	0.864587	0.99032	0.927228	1.02164	0.817935	0.808072	0.0427805	0.92553	0.595732
	PC O-36:0	1.0554	0.626087	0.842138	0.251953	0.984901	0.901674	0.727504	0.0486104	0.926741	0.693479
	PC O-39:8	0.870557	0.023203	0.896867	0.27088	0.958254	0.454975	0.983965	0.731812	1.01924	0.703706
	PE 19:1	1.01965	0.931478	0.790776	0.271335	1.39878	0.38662	0.615691	0.0350185	0.59622	0.0106309
	PE 21:3	0.802785	0.102906	0.689881	0.0137888	1.25764	0.507982	0.667221	0.0170314	0.531425	0.00447356
	PE 23:4	0.858019	0.337281	0.719754	0.051596	1.32046	0.422708	0.651558	0.027886	0.586113	0.00786431
	PE 32:1|PE 16:0_16:1	0.928903	0.229149	0.858131	0.0252129	0.836484	0.0111205	0.747655	0.000974676	0.939896	0.301629
	PE 34:1|PE 16:0_18:1	0.983002	0.792176	1.02381	0.778839	0.985647	0.81782	0.806036	0.0183615	0.976376	0.817738
	PE 36:4|PE 16:0_20:4	0.91722	0.133695	0.999873	0.99765	0.936145	0.0177968	0.897821	0.000912526	1.01871	0.479824
	PE 36:4|PE 18:2_18:2	0.912228	0.113251	1.0097	0.824388	0.932053	0.0169379	0.896181	0.00119077	1.01578	0.557142
	PE 36:5|PE 16:1_20:4	0.914296	0.431607	1.12256	0.163843	0.765945	0.00308773	0.651141	0.000370682	0.995751	0.964797
	PE 36:6|PE 14:0_22:6	0.95847	0.728193	1.50486	0.0158024	1.03562	0.784741	0.697543	0.0331074	1.06961	0.711369
	PE 38:7|PE 16:1_22:6	0.984338	0.878622	1.07718	0.47359	0.98107	0.773432	0.841171	0.0276843	0.966605	0.737441
	PE 38:8	0.925909	0.604751	0.41807	0.0015539	1.04139	0.421081	0.962141	0.621703	0.699577	0.00181733
	PE 40:7|PE 18:1_22:6	1.0167	0.813323	0.777798	0.00569401	1.00544	0.901419	0.927097	0.278785	0.771418	0.011239
	PE 40:8	0.971921	0.793943	0.391493	0.00785373	1.06699	0.474026	1.04556	0.619696	0.831244	0.131996
	PE 44:10|PE 22:4_22:6	0.894257	0.107992	0.47805	0.00126033	0.978117	0.762931	0.960494	0.531667	0.756133	0.0101852
	PE 44:12|PE 22:6_22:6	0.940648	0.454582	0.317732	0.00627897	0.973082	0.699974	0.997205	0.967647	0.833594	0.133178
	PE O-42:9|PE O-20:3_22:6	1.02801	0.842513	1.23509	0.0367665	1.0397	0.388452	0.943539	0.365366	1.04955	0.535982
	PE P-38:6|PE P-16:0_22:6	0.974224	0.463729	1.03392	0.391002	0.916631	0.0296202	0.952297	0.0367735	0.996765	0.868562
	PE P-42:1|PE P-18:1_24:0	1.09205	0.731409	0.437763	0.0360048	1.11822	0.60742	0.754798	0.222722	1.09084	0.839682
	PI 36:1	0.917835	0.215927	0.993173	0.918826	1.0211	0.790682	0.820744	0.0304244	0.932822	0.291778
	PI 36:4|PI 16:0_20:4	0.867635	0.263135	0.448226	0.0368019	0.932998	0.327288	0.851054	0.0390596	0.943717	0.550754
	PI 40:4	0.834507	0.328473	0.390075	0.03913	0.831665	0.53985	1.0393	0.875261	1.19315	0.28269
	PS 32:1|PS 16:0_16:1	0.817989	0.528409	0.285794	0.000279304	0.666461	0.0159657	0.771638	0.0308755	0.576066	0.00282001
	PS 36:2|PS 18:1_18:1	1.01648	0.860534	0.310701	0.00378862	1.09281	0.442546	1.08746	0.378457	0.818144	0.190017
	PS 38:2|PS 18:1_20:1	1.03723	0.665783	0.705256	0.00518458	0.945883	0.614957	1.16306	0.102913	0.939781	0.571523
	PS 38:4|PS 18:0_20:4	1.00443	0.969143	0.554229	0.025161	1.03416	0.780953	0.985947	0.898191	0.935681	0.613423
	PS 40:6|PS 18:0_22:6	0.892059	0.131368	0.221308	0.00356416	0.923893	0.248988	0.957125	0.500955	0.794956	0.0599859
	PS 41:6|PS 19:0_22:6	0.876398	0.392981	0.306597	0.00618773	0.956081	0.775411	0.924156	0.589098	0.764607	0.211789
	PS 42:10|PS 20:4_22:6	0.841495	0.155806	0.338695	0.0255041	1.09376	0.509057	0.919267	0.445977	0.8141	0.124003
	PS 42:8	0.907678	0.476489	0.361305	0.041079	1.0981	0.456113	0.823651	0.152567	0.856892	0.295177
	PS 44:10|PS 22:4_22:6	0.880845	0.19159	0.287419	0.0153915	0.98534	0.860784	0.829218	0.0719162	0.841301	0.0995758
	PS 44:12|PS 22:6_22:6	0.860558	0.26125	0.30547	0.0245124	1.06366	0.614848	0.827871	0.14389	0.822074	0.170827
	PS 46:11|PS 24:5_22:6	0.873393	0.236808	0.320073	0.0171913	0.961752	0.658793	0.798357	0.116759	0.75204	0.0380888
	SM 35:1;2O	1.18182	0.60281	0.852169	0.167135	0.940883	0.131747	0.906442	0.0339699	0.971249	0.369336
	SM 36:2;2O|SM 18:1;2O/18:1	0.837823	0.189168	0.975181	0.63104	0.897653	0.0967596	0.865655	0.0437208	1.00951	0.860532
	SM 36:3;2O	0.867671	0.370321	1.03165	0.704609	0.882215	0.143734	0.752872	0.0219458	1.03405	0.764343
	SM 39:1;2O	0.916949	0.246402	0.776879	0.00595185	0.960489	0.614964	0.75419	0.00687621	0.894639	0.235229
	SM 40:1;2O	0.724186	0.0764507	0.472553	0.00330524	0.914151	0.594556	0.666261	0.0450127	0.778044	0.137787
	SM 41:1;2O	0.842658	0.254165	0.531194	0.00170045	0.842194	0.0530033	0.690137	0.000877207	0.732525	0.00227847
	SM 42:1;2O	0.807977	0.229086	0.565066	0.0176677	0.876813	0.312644	0.742094	0.0533342	0.766509	0.0955696
	TG 50:1|TG 16:0_16:0_18:1	0.956467	0.862834	0.822533	0.385712	0.84074	0.610889	0.444199	0.0379501	0.732831	0.261228
	TG 52:1|TG 16:0_18:0_18:1	0.930714	0.635049	0.985309	0.920784	0.728735	0.152247	0.452418	0.00583203	0.778201	0.181458
	TG 52:6|TG 16:1_18:2_18:3	0.947806	0.800709	0.925147	0.727697	0.581555	0.0571542	0.342308	0.00640138	0.710697	0.189164
	TG 54:6|TG 18:1_18:2_18:3	0.847984	0.315422	0.918696	0.585158	0.807659	0.362963	0.529547	0.0262972	0.775214	0.113543
	TG 56:5|TG 18:1_18:2_20:2	1.01251	0.914886	1.02489	0.872756	0.918869	0.584474	0.663005	0.0338743	0.933036	0.592884
	TG 56:6|TG 16:0_18:1_22:5	0.877487	0.371815	1.05356	0.731426	0.724178	0.0277587	0.523202	0.00241204	0.826991	0.194833
	TG 58:10|TG 18:2_18:2_22:6	0.877379	0.417051	1.30432	0.159231	0.812288	0.0422329	0.662956	0.00083228	0.920428	0.514257
	TG 58:12|TG 18:2_18:4_22:6	0.828765	0.352328	1.42755	0.156641	0.917956	0.547993	0.660358	0.0357459	0.728994	0.220935
	TG 60:12|TG 16:0_22:6_22:6	0.920143	0.67159	1.159	0.434602	0.775343	0.114446	0.635959	0.0166859	0.819446	0.255349
	TG 60:13|TG 18:2_20:5_22:6	0.939018	0.827819	1.17445	0.492185	0.977875	0.899886	0.553258	0.00430231	0.672835	0.0155627
	TG 62:13|TG 18:1_22:6_22:6	1.03613	0.821487	1.19903	0.343968	0.832671	0.258563	0.677202	0.0342519	0.79668	0.294072
	TG 64:16|TG 20:4_22:6_22:6	1.41329	0.198571	1.86603	0.1931	1.10438	0.717175	0.62995	0.0334905	0.739938	0.358092

## Sheet: OB
Supplementary Table 14. Statistics of differential lipids in each period of fasting in OB.
FC: fold change, the ratio of metabolite level in each period pf fasting to that of Ctrl.
“↑”：Lipid that incresed after short-term fasting.
“↓”：Lipid that decreased after short-term fasting.
	Lipid	F-3h vs. Ctrl		F-6h vs. Ctrl		F-12h vs. Ctrl		F-24h vs. Ctrl		Ref vs. Ctrl
		FC(F-3h/Ctrl)	p value	FC(F-6h/Ctrl)	p value	FC(F-12h/Ctrl)	p value	FC(F-24h/Ctrl)	p value	FC(Ref/Ctrl)	p value
↑	CAR 18:2	0.958792	0.869505	1.67438	0.111502	1.35871	0.117812	1.59628	0.0154934	0.615755	0.0501401
	Cer 40:2;2O|Cer 18:2;2O/22:0	1.40672	0.220403	2.0553	0.0837096	1.37167	0.283409	1.4961	0.0195799	1.50099	0.0578177
	Cer 43:1;3O|Cer 18:1;2O/25:0;O	1.57945	0.193557	2.13225	0.154908	1.17355	0.712892	1.33022	0.0353135	1.36137	0.367487
	DG 27:5	0.976667	0.881688	3.17279	0.0439871	1.02584	0.866042	1.11838	0.397486	1.11669	0.415425
	DG 33:1|DG 15:0_18:1	1.30361	0.0214905	1.63545	0.0101936	1.34618	0.0130492	1.52265	0.000813146	1.01083	0.936942
	DG 34:2|DG 16:0_18:2	1.47494	0.142999	1.74165	0.154905	1.86645	0.0145406	2.30991	0.00495187	1.39554	0.252219
	DG 36:4|DG 16:0_20:4	1.11325	0.321552	1.18978	0.367291	1.14014	0.016833	0.913986	0.11258	1.17134	0.269575
	DG 38:5|DG 18:1_20:4	1.16063	0.107084	1.42607	0.237652	1.20806	0.0174718	0.955872	0.507785	1.16874	0.360709
	DG 42:2|DG 18:1_24:1	1.42355	0.0866917	1.59376	0.0206575	1.55446	0.0476297	1.22871	0.581138	1.4136	0.160847
	DG 48:6	0.822199	0.106566	1.4109	0.011881	1.25116	0.00797073	1.16245	0.067215	1.03563	0.785324
	FA 12:0	1.17183	0.177736	1.21869	0.0794168	1.1134	0.182519	1.21317	0.0135058	1.50825	0.00245804
	FA 13:0	0.976711	0.84533	1.52908	0.0113324	1.09576	0.46909	1.01641	0.910815	0.956445	0.77761
	FA 18:2	1.31269	0.0588435	1.52707	0.101716	1.39918	0.030004	1.82427	0.00649039	1.34725	0.0777005
	FA 21:0	1.10569	0.533291	1.84246	0.0336189	1.26284	0.0953846	1.3876	0.0339716	1.23118	0.115211
	FA 22:0	1.20396	0.262965	2.14819	0.105125	1.13369	0.441752	1.30795	0.0290867	1.28972	0.257186
	FA 24:0	1.18772	0.322098	1.80179	0.0658761	1.32475	0.0540059	1.67562	0.00500326	1.48642	0.113207
	FA 26:1	1.35992	0.261968	2.28377	0.0582443	1.34117	0.186919	1.93239	0.00314219	1.5437	0.180462
	HexCer 36:2;3O|HexCer 18:2;2O/18:0;O	1.46128	0.196576	1.74927	0.0917654	1.44358	0.138473	1.60063	0.0318385	1.30514	0.248715
	LPE 18:2	1.04467	0.750846	1.907	0.0359291	1.13323	0.282792	1.14433	0.261783	1.02342	0.861749
	LPE 22:1	0.975817	0.857929	2.71558	0.000573511	0.945277	0.632921	0.894242	0.468747	0.919683	0.510051
	NAE 13:0	0.782782	0.586508	15.6345	0.0498917	1.88062	0.176147	2.09275	0.0316389	1.32455	0.566976
	NAE 16:2	0.845503	0.672914	11.4899	0.154803	1.84284	0.206234	2.40784	0.00891639	1.38977	0.362293
	NAE 6:0	1.17022	0.681232	1.16547	0.698279	1.06442	0.834521	1.88672	0.038774	0.836807	0.607662
	PC 31:0	1.16948	0.20065	1.12095	0.0412386	1.14012	0.033076	1.12365	0.00686927	1.14266	0.00614623
	PC 32:0|PC 16:0_16:0	1.14442	0.375808	1.23252	0.0788043	1.26368	0.0246382	1.28557	0.00719335	1.26923	0.0291912
	PC 33:0|PC 16:0_17:0	1.14873	0.148106	1.13048	0.148111	1.13258	0.127116	1.12183	0.0124418	1.14586	0.0494364
	PC 33:1	1.0906	0.37601	1.28751	0.089293	1.13568	0.0334412	1.19983	0.00304082	1.08815	0.0118107
	PC 33:2|PC 15:0_18:2	1.54223	0.0991664	1.30527	0.33678	1.67627	0.008646	2.14538	0.000224466	1.34063	0.0469534
	PC 34:1|PC 16:0_18:1	1.15344	0.364299	1.3058	0.0873894	1.24366	0.0820608	1.26982	0.0160643	1.2269	0.0807328
	PC 34:2|PC 16:0_18:2	1.11783	0.0708176	1.25661	0.0181858	1.34446	7.28904e-05	1.54208	1.2844e-05	1.21722	7.18485e-05
	PC 34:3	1.272	0.102964	1.23941	0.0733119	1.36942	0.00296535	1.51036	0.00267589	0.995428	0.958236
	PC 35:2	1.07161	0.476534	1.34115	0.0748465	1.22194	0.0063039	1.30845	0.000309333	1.06594	0.19048
	PC 36:2|PC 18:1_18:1	1.0738	0.469536	1.23769	0.0950403	1.14292	0.0897336	1.19565	0.0110428	1.14766	0.0661742
	PC 36:3|PC 18:1_18:2	1.0449	0.577922	1.22885	0.0553681	1.16722	0.0231769	1.24817	0.00173134	1.09747	0.0984884
	PC 36:4|PC 16:0_20:4	0.995367	0.928997	1.17961	0.0784039	1.05664	0.0383744	1.04865	0.0664641	1.05105	0.053431
	PC 37:2|PC 19:0_18:2	1.0413	0.419364	1.34808	0.121225	1.03428	0.50354	1.12704	0.026814	1.00451	0.945528
	PC 37:4|PC 17:0_20:4	1.06515	0.478205	1.32666	0.107165	1.11854	0.0618361	1.16674	0.00112661	1.13506	0.00156373
	PC 38:4|PC 18:0_20:4	1.05525	0.581084	1.26496	0.091543	1.11653	0.123437	1.12555	0.0443804	1.13402	0.074481
	PC 39:6	1.13101	0.104169	1.2996	0.0361131	1.11375	0.154083	1.13781	0.0721481	1.17897	0.076151
	PC 40:6	1.06565	0.530019	1.30246	0.0634337	1.14996	0.0370369	1.18372	0.0188796	1.16935	0.0608907
	PC 40:8|PC 18:2_22:6	1.15218	0.257083	1.03932	0.699779	1.25807	0.0171038	1.41284	0.00185248	0.930082	0.348301
	PC 43:10|PC 21:4_22:6	1.13186	0.552486	1.42945	0.00107503	1.36103	0.121422	1.535	0.00612684	1.56323	0.0033564
	PC O-30:0	0.968696	0.624484	1.19045	0.0407193	1.00669	0.882207	0.909062	0.208314	0.965873	0.55003
	PC O-35:1	0.991335	0.889675	1.03391	0.439237	1.06542	0.0894016	1.11062	0.0228756	1.02478	0.468694
	PE 34:2|PE 16:0_18:2	1.06105	0.204686	1.01655	0.760229	1.12139	0.0318987	1.14158	0.0156205	1.14199	0.00214114
	PE 36:1|PE 18:0_18:1	1.05408	0.457706	0.891032	0.297914	1.07692	0.0487935	1.0746	0.113888	1.02223	0.433632
	PE 36:3|PE 18:1_18:2	1.05244	0.509349	1.04746	0.36739	1.19048	0.0143385	1.33063	0.000321637	1.11237	0.0660661
	PE 38:4|PE 18:0_20:4	1.06793	0.429871	1.09321	0.131607	1.11916	0.0947636	1.13548	0.02018	1.12005	0.065562
	PE 39:6|PE 17:0_22:6	1.09236	0.381374	1.15908	0.0564785	1.12931	0.0494841	1.17178	0.0130989	1.14695	0.0410421
	PE 40:4	1.0681	0.606909	1.02023	0.807334	1.16717	0.0960565	1.16977	0.0330066	1.11547	0.132907
	PE 40:4|PE 18:0_22:4	1.06934	0.598973	1.02105	0.802187	1.16844	0.091683	1.17221	0.03201	1.11795	0.124171
	PE 42:9;O|PE 22:6_20:3;O	1.00619	0.817442	1.12097	0.0487115	1.03357	0.295028	1.02156	0.685823	1.0703	0.0325397
	PE P-32:1|PE P-18:1_14:0	1.46078	0.317395	1.19039	0.661195	1.17055	0.511407	1.64624	0.0382023	1.56666	0.128593
	PE P-34:2|PE P-16:0_18:2	1.07322	0.633367	0.884633	0.253248	1.14289	0.176358	1.22878	0.0293208	1.13435	0.107875
	PE P-36:2|PE P-18:1_18:1	1.05216	0.701825	0.996995	0.971677	1.15612	0.0117796	1.19925	0.00591616	1.04335	0.454394
	PE P-36:4|PE P-16:0_20:4	1.18138	0.406802	1.16133	0.255481	1.38058	0.0459829	1.39687	0.00641046	1.32387	0.0331006
	PE P-40:7|PE P-18:1_22:6	1.01186	0.898357	1.1966	0.0604929	1.13835	0.049991	1.15889	0.0071238	1.13933	0.0400568
	PI 32:0	1.26541	0.310397	0.922121	0.726295	1.23636	0.0352881	1.21812	0.0940088	0.875144	0.202235
	PI 37:4	1.15352	0.611009	2.57083	0.00743356	1.36212	0.169093	1.06007	0.791604	1.20754	0.415898
	PI 38:4	1.06473	0.630082	0.654749	0.313494	1.24908	0.0492416	1.14941	0.291275	1.20494	0.0847832
	PI 40:8|PI 20:4_20:4	1.05097	0.836712	0.453943	0.0420039	1.16783	0.327913	1.36246	0.0347183	0.71496	0.0428134
	SM 34:0;3O	1.12813	0.0221295	0.753889	0.146394	1.01288	0.741602	0.946407	0.0815515	1.09484	0.0630289
	SM 36:1;2O|SM 18:1;2O/18:0	1.22909	0.232631	0.946023	0.76348	1.36355	0.0972455	1.42293	0.0105201	1.38722	0.0277216
	SM 38:2;2O|SM 18:2;2O/20:0	1.06463	0.754744	1.21495	0.0185331	1.20736	0.19381	1.21136	0.0116544	1.07249	0.525466
	TG 42:1|TG 8:0_16:0_18:1	1.9095	0.0379651	1.16879	0.678752	1.01485	0.973918	0.71933	0.479478	1.12917	0.708927
	TG 62:4|TG 18:1_26:1_18:2	3.80749	0.0250639	1.95236	0.187173	1.85518	0.292882	1.94895	0.0966829	1.27722	0.748715
↓	Cer 39:1;2O|Cer 18:1;2O/21:0	0.918596	0.565832	1.20677	0.376943	0.811032	0.0199613	0.897006	0.264726	0.77495	0.0115605
	Cer 41:1;2O|Cer 18:1;2O/23:0	1.0058	0.964645	1.18521	0.351435	0.823466	0.032688	0.891296	0.160593	0.91225	0.410893
	Cer 42:1;2O|Cer 18:1;2O/24:0	1.09253	0.415525	1.17168	0.333974	0.838358	0.0188724	0.822059	0.0883889	1.07118	0.350631
	Cer 45:1;3O|Cer 20:1;2O/25:0;O	1.11621	0.556561	0.877633	0.315812	0.693026	0.0019811	0.742445	0.102459	1.09181	0.477446
	CL 78:12|CL 18:1_18:1_20:4_22:6	0.883967	0.374984	0.448149	0.0861654	0.822719	0.0804864	0.806985	0.0435794	0.820861	0.0730969
	CL 78:14|CL 16:1_18:1_22:6_22:6	0.852577	0.335608	0.431777	0.0716257	0.771074	0.0441621	0.788613	0.0460716	0.835673	0.137969
	CL 80:14|CL 18:1_18:1_22:6_22:6	0.876994	0.331712	0.448087	0.0793008	0.812662	0.0677327	0.797047	0.0329563	0.812493	0.0590437
	CL 82:17|CL 18:1_20:4_22:6_22:6	0.865025	0.337651	0.461089	0.0915603	0.788145	0.0593168	0.789203	0.0398315	0.788704	0.064777
	CL 84:19|CL 18:1_22:6_22:6_22:6	0.98489	0.955841	0.312774	0.00455723	0.603259	0.00385843	0.796058	0.0506733	0.71576	0.107838
	DG 44:2|DG 18:1_26:1	0	0.0113306	6.31791	0.197637	0.285251	0.122666	1.53584	0.449963	2.8214	0.300529
	DG 50:0	1.03648	0.846623	0.578713	0.0642824	0.647743	0.0219907	0.471682	0.0159221	0.682437	0.0859041
	DG 51:6	0.903549	0.679878	0.685412	0.0941812	0.64129	0.053809	0.406582	0.00933726	0.690577	0.120834
	DG 52:0	0.646189	0.153763	0.593828	0.0215243	0.650113	0.0346715	0.597332	0.0175009	0.68834	0.0485322
	DG 52:1	0.929861	0.701039	0.664736	0.0603418	0.665938	0.0394065	0.534621	0.00625382	0.567142	0.0221521
	DG 52:2	1.05134	0.82879	0.774324	0.193478	0.791421	0.148164	0.623061	0.0320715	0.536588	0.0312676
	LPC 16:0	0.926699	0.543088	0.947938	0.551519	0.750326	0.0169498	0.728235	0.00867335	0.815672	0.0776594
	LPC 17:0	1.1141	0.358914	1.17126	0.0764174	0.970464	0.56517	0.722192	0.0134869	0.938659	0.548237
	LPC 18:0	0.89053	0.344657	0.937434	0.453634	0.745421	0.0150416	0.757131	0.0187263	0.787675	0.0509777
	LPC 18:1	0.906509	0.453179	1.01649	0.894194	0.784816	0.0657664	0.763195	0.0350368	0.825626	0.129519
	LPC 21:0	0.929567	0.650126	0.937462	0.644904	0.867118	0.267532	0.659345	0.0100261	0.739948	0.0541177
	LPC 22:6	0.987262	0.928656	1.18307	0.498246	0.834364	0.154539	0.776517	0.0354518	0.985331	0.891136
	LPC 23:1	0.611823	0.0915717	0.797724	0.437956	0.506355	0.00430288	0.65438	0.0155046	0.605694	0.0156136
	LPC 25:0	0.915393	0.476002	0.885211	0.264338	0.730272	0.010532	0.805812	0.010025	0.791152	0.00550905
	LPC 27:0	1.05249	0.594168	0.577606	0.0932546	0.899286	0.156386	0.865501	0.0293833	0.903967	0.110264
	LPC 28:2	0.777381	0.174332	0.728928	0.0977694	0.648489	0.0126311	0.703668	0.0228624	0.554488	0.01082
	LPE 16:0	1.04571	0.729219	0.920885	0.321907	0.779965	0.00852198	0.737013	0.00573594	0.914139	0.365227
	LPE 16:1	1.08525	0.627749	1.89319	0.0222569	0.984343	0.892946	0.974538	0.833048	1.03727	0.754558
	LPE 20:0	0.859912	0.245942	1.0024	0.979515	0.786234	0.0501889	0.756812	0.0356847	0.815099	0.114065
	LPE O-16:1	0.981502	0.897615	0.785425	0.111272	0.778301	0.00717797	0.773565	0.0172343	0.910475	0.382031
	LPE O-16:2	1.02553	0.858351	1.38311	0.434857	0.811237	0.0962278	0.810458	0.0284024	0.851834	0.151036
	MG 20:0	0.895319	0.102665	1.09466	0.386582	0.826576	0.00488919	0.822967	0.00240324	0.869374	0.0606506
	PC 28:0|PC 14:0_14:0	1.05096	0.783414	0.968959	0.732541	0.781031	0.0131183	0.756817	0.00707868	0.861891	0.105199
	PC 29:0|PC 14:0_15:0	1.13228	0.583253	1.07064	0.4807	0.865279	0.0767943	0.835082	0.0100299	0.923302	0.233261
	PC 30:1|PC 14:0_16:1	0.91942	0.663679	0.815914	0.132373	0.709486	0.0239431	0.717705	0.0223369	0.810724	0.0975894
	PC 34:4|PC 14:0_20:4	0.959443	0.813456	0.854559	0.122059	0.834117	0.0462005	0.831199	0.0349032	0.867061	0.0624928
	PC 36:0|PC 18:0_18:0	0.975568	0.772439	0.844016	0.102411	0.852143	0.0553032	0.824889	0.0138698	0.846048	0.00335867
	PC 36:5	0.89695	0.413877	0.977033	0.784374	0.777936	0.00915576	0.742233	0.00165888	0.819033	0.0171843
	PC 36:6|PC 14:0_22:6	1.08496	0.66202	0.954873	0.653389	0.775987	0.00625009	0.760956	0.000959372	0.873376	0.0539446
	PC 37:6|PC 15:0_22:6	1.13778	0.428761	0.938206	0.411788	0.964111	0.420644	0.950405	0.0241582	0.958952	0.348543
	PC 38:6|PC 16:0_22:6	1.00709	0.755729	1.04245	0.203058	0.964114	0.112788	0.938136	0.00114898	0.98168	0.310978
	PC 38:7	0.972432	0.8533	0.905853	0.276381	0.759254	0.00934983	0.734771	0.00243675	0.845516	0.0405989
	PC 40:0|PC 16:0_24:0	0.923568	0.262674	0.805219	0.157956	0.813882	0.012671	0.880008	0.133057	0.786871	0.0286398
	PC 41:3	0.933679	0.340939	1.18915	0.291227	0.872657	0.0212719	0.918419	0.291536	0.896677	0.0373676
	PC 42:10|PC 20:4_22:6	0.883317	0.299741	0.902156	0.201733	0.812648	0.0164062	0.841932	0.0107032	0.846291	0.0124256
	PC 42:4	0.94674	0.511525	1.06517	0.601528	0.897642	0.138281	0.805594	0.0370306	0.810728	0.00567051
	PC 42:9	0.903228	0.25134	0.955849	0.55063	0.827945	0.0118408	0.839395	0.000846555	0.879899	0.00493168
	PC 43:5|PC 23:1_20:4	0.832525	0.0725958	1.09358	0.597385	0.782388	0.0341106	0.762155	0.0600974	0.760235	0.0127264
	PC 44:12|PC 22:6_22:6	0.988778	0.937982	0.753417	0.124099	0.851759	0.10546	0.855856	0.0180274	0.900066	0.121827
	PC 44:2	0.793044	0.0401819	1.11239	0.334792	0.79844	0.0899101	0.804623	0.155232	0.703127	0.0215593
	PC 44:4|PC 24:0_20:4	0.748445	0.0177437	1.01757	0.888135	0.764687	0.0486468	0.714676	0.0599316	0.656079	0.000236056
	PC 46:5	0.77139	0.0141606	0.922174	0.490557	0.775194	0.176758	0.662303	0.0105921	0.70836	0.00663375
	PC 46:7	1.09427	0.435963	1.19142	0.38143	0.897266	0.223341	0.740164	0.00295779	0.762842	0.00870604
	PC 50:4	1.04067	0.807655	0.870741	0.310636	0.871543	0.179839	0.771009	0.0187404	0.775321	0.0347051
	PC 50:6	0.959704	0.776928	0.814501	0.124759	0.793839	0.0740148	0.686067	0.0200938	0.72969	0.0107003
	PC 52:4	0.871202	0.445084	0.709505	0.0850698	0.760004	0.0468655	0.73636	0.0277347	0.747815	0.0525412
	PC 52:6	1.01316	0.919877	0.924483	0.424114	0.80067	0.0218721	0.71847	0.0013302	0.775307	0.0131971
	PC 52:7	0.993695	0.974485	1.12008	0.476699	0.816297	0.210364	0.571097	0.0188369	0.717789	0.101586
	PC 54:8	0.920027	0.588225	1.08212	0.318402	0.855962	0.108513	0.716844	0.00415533	0.814704	0.0383707
	PC 56:10	0.959059	0.742942	1.14742	0.323638	0.812638	0.0249155	0.759402	0.00989806	0.797879	0.0412641
	PC 56:12	1.15433	0.328497	1.00085	0.994295	0.819596	0.128633	0.687863	0.0210991	0.803191	0.0396131
	PC 56:7	0.913716	0.577775	0.919272	0.558622	0.73061	0.0337981	0.725912	0.0485255	0.712106	0.0193411
	PC 56:8	0.894838	0.538404	0.929952	0.570483	0.7693	0.0437292	0.728758	0.0264143	0.70943	0.016035
	PC 56:9	0.958908	0.793218	1.11812	0.444251	0.755637	0.0413055	0.715119	0.0177589	0.738995	0.0206872
	PC 58:12	1.10847	0.529024	0.971571	0.732965	0.805749	0.0166767	0.691524	0.000276306	0.820017	0.0229928
	PC 58:8	0.885646	0.414494	0.869086	0.288814	0.808772	0.0788202	0.747044	0.0338401	0.760414	0.0474891
	PC 58:9	0.868685	0.346952	0.835814	0.208812	0.776403	0.0422619	0.691762	0.0206034	0.732674	0.020441
	PC 60:10|PC 30:5_30:5	0.88946	0.485424	0.932491	0.612391	0.777333	0.0539169	0.747291	0.0357913	0.792326	0.0898584
	PC 60:12|PC 30:6_30:6	0.981263	0.908557	1.05611	0.656444	0.802431	0.0374855	0.743147	0.00829794	0.785874	0.0870512
	PC 62:12	1.04295	0.831019	0.984927	0.901305	0.81832	0.17676	0.668083	0.0199489	0.769761	0.0929485
	PC O-36:0	0.979151	0.862076	0.754502	0.0724232	0.762368	0.00965029	0.723591	0.0135684	0.849969	0.0415951
	PC O-38:0	0.977302	0.901068	0.65673	0.10705	0.714674	0.00380666	0.652946	0.00487409	0.903368	0.219563
	PC O-40:1	0.898161	0.356065	1.0182	0.786377	0.789239	0.0408313	0.804512	0.162443	0.736148	0.0037628
	PE 19:1	0.721689	0.147548	1.10854	0.613294	0.916621	0.524579	0.634936	0.03551	0.739594	0.0962815
	PE 32:2|PE 16:1_16:1	1.18834	0.28395	1.01774	0.880139	0.586348	0.0131144	0.734747	0.027215	1.02797	0.843185
	PE 34:1|PE 16:0_18:1	0.958793	0.655628	0.837552	0.0752058	0.818839	0.0187667	0.73989	0.00186102	0.865227	0.0660634
	PE 34:4|PE 16:1_18:3	5.88063	0.123058	0.842247	0.486296	0.753944	0.243216	0.48035	0.0246843	1.6266	0.404828
	PE 36:5|PE 16:1_20:4	0.947423	0.700861	0.941872	0.0852422	0.735062	0.000949908	0.677638	1.06398e-06	0.84234	0.00340338
	PE 36:6|PE 14:0_22:6	1.33664	0.139404	1.00504	0.967095	0.753724	0.0121211	0.70852	0.00137411	0.932932	0.55528
	PE 38:7|PE 16:1_22:6	0.929911	0.547721	0.845686	0.137654	0.876713	0.0749307	0.817756	0.0123379	0.903118	0.213597
	PE 40:6|PE 18:0_22:6	0.932986	0.44763	0.977504	0.722037	0.869775	0.0518723	0.855651	0.034968	0.877702	0.0800257
	PE 42:1|PE 24:0_18:1	0.997716	0.994607	0.40474	0.0264755	0.534175	0.00625519	0.911514	0.469008	0.760446	0.300293
	PE O-36:4|PE O-16:0_20:4	0.912089	0.357624	0.879089	0.187242	0.835315	0.0716871	0.818999	0.0384829	0.828228	0.0950421
	PE O-36:6|PE O-16:1_20:5	0.996688	0.97282	0.970869	0.714915	0.749109	0.0057765	0.737448	0.00132731	0.792101	0.0182123
	PE O-38:4|PE O-18:2_20:2	0.859717	0.226285	0.853564	0.187314	0.789993	0.0483415	0.783235	0.0435955	0.747315	0.0331363
	PE O-39:8|PE O-17:2_22:6	0.932603	0.600993	0.860507	0.0684815	0.820402	0.0223546	0.81255	0.00423213	0.852507	0.0239204
	PE O-42:9|PE O-20:3_22:6	0.976617	0.85913	1.029	0.70155	0.869927	0.0566836	0.841844	0.0278165	0.889268	0.0994019
	PE P-36:6|PE P-14:0_22:6	0.924098	0.463107	0.855281	0.130413	0.871528	0.244628	0.75178	0.0274065	0.900875	0.310604
	PE P-42:1|PE P-18:1_24:0	1.22381	0.677402	0.151462	0.00700739	0.390363	0.0268889	0.887912	0.605247	0.625406	0.260134
	PG 34:1|PG 16:0_18:1	0.882063	0.501345	0.822456	0.465934	0.655384	0.0265015	0.604584	0.0115816	0.639335	0.019289
	PG 34:2|PG 16:0_18:2	0.774015	0.152242	0.57525	0.10307	0.749997	0.114692	0.68539	0.0368212	0.775849	0.090713
	PG 40:7|PG 18:1_22:6	0.905517	0.57093	0.74308	0.0793208	0.780046	0.0636443	0.766964	0.0454338	0.739087	0.0373255
	PI 36:1	0.917966	0.23835	0.972935	0.397738	0.872815	0.0193491	0.830532	7.67654e-05	0.930287	0.0719238
	PI 36:2	1.03577	0.770444	0.868368	0.302149	0.832299	0.0879887	0.8212	0.0183886	0.877992	0.0481812
	PI 36:4|PI 16:0_20:4	0.971233	0.754995	0.483556	0.11294	0.89757	0.079778	0.834492	0.0176366	1.03123	0.600592
	PI 40:7	1.00887	0.944115	0.481058	0.0719124	0.822057	0.121227	0.776408	0.0425564	0.889286	0.134053
	PS 42:8	0.951644	0.764259	0.474132	0.114593	0.823884	0.0404235	0.807897	0.027089	0.803804	0.0199817
	PS 44:10|PS 22:4_22:6	0.856982	0.346654	0.46121	0.0916727	0.850861	0.13045	0.803781	0.0271219	0.857112	0.124576
	SM 31:1;2O	1.19785	0.349996	1.15066	0.646271	0.641414	0.0388319	0.593208	0.0384084	0.539972	0.0195231
	SM 32:1;2O	0.897228	0.448247	0.721915	0.0545754	0.748078	0.0153939	0.722646	0.00618434	0.757982	0.0172283
	SM 33:1;2O|SM 17:1;2O/16:0	0.967807	0.819818	0.763532	0.070211	0.919289	0.125142	0.867924	0.00579388	0.914928	0.371816
	SM 34:2;2O|SM 18:2;2O/16:0	0.764283	0.024019	0.755524	0.054747	0.797325	0.0120351	0.758751	0.00761808	0.771635	0.0194944
	SM 34:2;3O	0.70139	0.11555	0.811753	0.344848	0.634332	0.0477271	0.639938	0.0575222	0.610331	0.0461789
	SM 39:1;2O	1.014	0.875184	0.746803	0.0376998	0.859783	0.109833	0.877966	0.102344	0.852849	0.071736
	SM 40:7;2O|SM 18:2;2O/22:5	1.02095	0.856831	1.02072	0.793896	0.947655	0.556242	0.844325	0.0243821	0.794504	0.0144877
	SM 41:1;2O	1.07422	0.607971	0.611932	0.0384571	0.862663	0.170504	0.908538	0.203752	0.964302	0.737867
	SM 42:1;3O	0.963946	0.546272	0.754926	0.0462051	0.850688	0.0202446	0.882885	0.0871626	0.918407	0.105174
	SM 42:2;2O	0.992233	0.905334	0.883257	0.164231	0.872861	0.0723795	0.837511	0.0153915	0.841892	0.00369625
	ST 27:1;O	0.860048	0.256654	1.48625	0.26106	0.691948	0.0240142	0.641705	0.00832348	0.664455	0.013305
	ST 27:2;O	0.908112	0.462159	0.911094	0.46311	0.838563	0.123338	0.738988	0.0246549	0.770682	0.0621544
	TG 38:1|TG 8:0_12:0_18:1	1.43812	0.269058	0.423013	0.0493534	0.246883	0.0127796	0.208159	0.0085463	0.513244	0.0977767
	TG 40:0|TG 12:0_14:0_14:0	1.27026	0.536916	1.95116	0.412131	0.928325	0.838264	0.249783	0.0379948	0.697201	0.304373
	TG 42:3|TG 8:0_16:1_18:2	1.39118	0.597913	0.320164	0.0465526	0.266508	0.0450463	0.0903162	0.0146685	0.349124	0.0853946
	TG 44:2|TG 10:0_16:0_18:2	2.21821	0.21131	0.336613	0.0911012	0.221816	0.0447839	0.133594	0.0295796	0.416819	0.125403
	TG 46:1|TG 14:0_16:0_16:1	1.81425	0.218605	0.4928	0.157727	0.33975	0.0808649	0.210438	0.045492	0.414498	0.129482
	TG 48:1|TG 14:0_16:0_18:1	1.48652	0.278214	0.500314	0.0505717	0.365414	0.0198154	0.248533	0.00971535	0.472753	0.0543716
	TG 50:1|TG 16:0_16:0_18:1	1.121	0.613497	0.545483	0.0133938	0.442657	0.00440348	0.316935	0.00158472	0.514849	0.0170641
	TG 51:1|TG 16:0_17:0_18:1	1.43458	0.296981	0.538701	0.0617699	0.446454	0.0155897	0.402128	0.0180077	0.532813	0.0439744
	TG 52:1|TG 16:0_18:0_18:1	1.01643	0.929597	0.616859	0.00291318	0.500988	0.000632973	0.401075	0.00019231	0.55342	0.00456885
	TG 52:2|TG 16:0_18:1_18:1	1.42948	0.522969	0.441122	0.0936626	0.336677	0.0530715	0.295827	0.0441428	0.428171	0.0920249
	TG 52:6|TG 16:1_18:2_18:3	1.25682	0.35106	0.73411	0.0280282	0.596087	0.0016107	0.450995	5.64867e-05	0.618082	0.0421201
	TG 53:7|TG 15:0_18:2_20:5	1.00205	0.984302	1.33506	0.260164	0.880815	0.215404	0.696342	0.0244051	0.777931	0.105574
	TG 54:1|TG 16:0_18:0_20:1	0.9822	0.908846	0.705446	0.00836073	0.582402	0.00148442	0.472573	0.000220431	0.607399	0.00340406
	TG 54:10|TG 18:2_16:3_20:5	0.331897	0.0130084	0.705942	0.298051	0.51894	0.0564268	0.630402	0.0991424	0.529485	0.0357794
	TG 54:2|TG 18:0_18:1_18:1	1.3478	0.616534	0.457836	0.0480642	0.376497	0.0283099	0.328225	0.0213674	0.420909	0.0415269
	TG 54:6|TG 18:1_18:2_18:3	1.05173	0.669979	0.675615	0.00677193	0.548694	0.000382449	0.440628	5.45351e-05	0.629258	0.0207625
	TG 56:1|TG 16:0_22:0_18:1	0.96435	0.909165	0.518476	0.00764955	0.36185	9.75873e-06	0.412313	0.00276379	0.438673	0.000848962
	TG 56:2|TG 18:0_18:1_20:1	1.1975	0.701739	0.485629	0.0457329	0.393568	0.0187119	0.322632	0.0122675	0.441922	0.0345345
	TG 56:3|TG 18:1_18:1_20:1	1.24959	0.611931	0.481502	0.0188142	0.455149	0.0167201	0.375675	0.00795679	0.467786	0.0215003
	TG 56:4|TG 18:1_20:1_18:2	1.06481	0.718257	0.700897	0.00478913	0.568715	0.000565118	0.497661	0.00014927	0.611249	0.00760964
	TG 56:5|TG 18:1_18:2_20:2	1.04398	0.753359	0.75784	0.00848524	0.631006	0.000496621	0.574374	0.000185754	0.642061	0.0091626
	TG 56:6|TG 16:0_18:1_22:5	0.978165	0.899871	0.79062	0.0451403	0.647799	0.00465417	0.567168	0.000910353	0.651834	0.0198701
	TG 57:2|TG 16:0_23:0_18:2	0.968735	0.967858	0.355212	0.0613983	0.262095	0.0335336	0.125395	0.0164519	0.331326	0.0857479
	TG 58:1|TG 16:0_24:0_18:1	0.992507	0.987602	0.294094	0.00846537	0.401068	0.0149576	0.348125	0.019205	0.309335	0.0147096
	TG 58:10|TG 18:2_18:2_22:6	0.970762	0.901327	0.997837	0.988598	0.713041	0.0268011	0.66776	0.0133878	0.704653	0.0538148
	TG 58:12|TG 18:2_18:4_22:6	0.997567	0.99394	0.916173	0.623848	0.476224	0.00674809	0.475825	0.00126472	0.524938	0.0248298
	TG 58:2|TG 16:0_18:1_24:1	1.12618	0.847956	0.301835	0.0118179	0.238832	0.00712462	0.243148	0.00941013	0.258837	0.0105905
	TG 58:2|TG 22:0_18:1_18:1	1.22411	0.756951	0.434115	0.0440364	0.236663	0.0123434	0.279167	0.0224166	0.272747	0.0176062
	TG 58:3|TG 18:1_18:1_22:1	1.28766	0.696906	0.283956	0.0552311	0.211128	0.0397733	0.220039	0.0431329	0.237753	0.0454482
	TG 58:3|TG 22:0_18:1_18:2	1.25814	0.768403	0.21085	0.0551331	0.209528	0.0484164	0.190124	0.0479025	0.216308	0.0534101
	TG 58:5|TG 18:0_18:1_22:4	0.995447	0.966542	0.800402	0.0653759	0.660349	0.00388974	0.598036	0.000728382	0.645741	0.00414681
	TG 58:6|TG 18:1_18:1_22:4	1.12724	0.483134	0.744833	0.0289691	0.704591	0.00633671	0.658117	0.0018082	0.676082	0.0222714
	TG 58:9|TG 18:1_18:2_22:6	1.10347	0.47934	0.851752	0.0898816	0.706894	0.00207057	0.714447	0.00143183	0.725533	0.0541831
	TG 59:11|TG 16:0_21:5_22:6	3.08109	0.395745	0.78529	0.731475	0.644016	0.55583	0	0.0381976	0.178516	0.0969084
	TG 60:1|TG 18:0_24:0_18:1	0.678523	0.299383	0.553992	0.152893	1.01265	0.967642	0.241434	0.0131318	0.619024	0.154847
	TG 60:12|TG 16:0_22:6_22:6	0.961975	0.871032	0.851525	0.235706	0.64981	0.0228896	0.573975	0.00324035	0.655048	0.0406245
	TG 60:13|TG 18:2_20:5_22:6	0.848468	0.650705	0.769032	0.291816	0.366117	0.0120958	0.450198	0.0245094	0.577927	0.0918623
	TG 60:3|TG 24:0_18:1_18:2	1.80117	0.595179	0.146493	0.0377575	0.145805	0.0337889	0.141076	0.0324766	0.241721	0.0641625
	TG 60:6|TG 18:1_18:1_24:4	1.45041	0.251139	0.963845	0.897022	0.516104	0.0557868	0.314747	0.0183923	0.425702	0.0403372
	TG 62:13|TG 18:1_22:6_22:6	1.03157	0.901162	0.888275	0.37275	0.677123	0.0159878	0.649064	0.0112014	0.652347	0.0286695
	TG 62:5|TG 26:1_18:2_18:2	1.4217	0.0345687	0.450671	0.0133624	0.712349	0.0469703	0.285078	0.000135897	0.206066	7.47402e-05
	TG 64:16|TG 20:4_22:6_22:6	0.750827	0.459155	0.974019	0.885529	0.439782	0.0140891	0.629839	0.0826908	0.528455	0.0697935
	TG 68:4|TG 18:1_32:1_18:2	0.610552	0.0988708	0.437891	0.0346229	0.473908	0.0134641	0.385974	0.00555617	0.865557	0.609419

## Sheet: CBL
Supplementary Table 15. Statistics of differential lipids in each period of fasting in CBL.
FC: fold change, the ratio of metabolite level in each period pf fasting to that of Ctrl.
“↑”：Lipid that incresed after short-term fasting.
“↓”：Lipid that decreased after short-term fasting.
	Lipid	F-3h vs. Ctrl		F-6h vs. Ctrl		F-12h vs. Ctrl		F-24h vs. Ctrl		Ref vs. Ctrl
		FC(F-3h/Ctrl)	p value	FC(F-6h/Ctrl)	p value	FC(F-12h/Ctrl)	p value	FC(F-24h/Ctrl)	p value	FC(Ref/Ctrl)	p value
↑	CAR 18:2	1.24306	0.276093	1.57082	0.084975	1.80709	0.0230463	1.5898	0.0234214	1.05435	0.813534
	CE 22:6	1.39861	0.272783	1.53875	0.176376	1.53623	0.0309342	1.48259	0.018881	1.51357	0.0151403
	Cer 37:1;2O|Cer 18:1;2O/19:0	1.25024	0.0333767	1.29266	0.0873421	1.20669	0.0332692	1.20385	0.0642245	1.15161	0.309783
	Cer 40:2;2O|Cer 18:2;2O/22:0	1.2805	0.209776	1.53709	0.0774082	1.98042	0.0167604	1.76754	0.0899949	1.12882	0.469868
	Cer 42:3;2O|Cer 18:2;2O/24:1	1.05641	0.302745	1.24056	0.195569	1.1548	0.0391255	1.09729	0.380271	1.04776	0.61753
	Cer 44:1;3O|Cer 20:1;2O/24:0;O	1.39783	0.00833271	1.3411	0.0617325	1.30875	0.065255	1.17035	0.35114	1.06695	0.579527
	PC 30:2|PC 12:0_18:2	1.76627	0.0453971	1.68083	0.14667	1.37558	0.303229	1.38161	0.237083	1.14142	0.631891
	PC 32:0|PC 16:0_16:0	0.953697	0.290669	0.967216	0.679959	1.12678	0.0988655	1.19251	0.0200627	0.948125	0.478089
	PC 33:2|PC 15:0_18:2	1.28726	0.0372253	1.15365	0.518624	1.34661	0.0850552	1.61504	0.00272174	1.08128	0.474079
	PC 34:0|PC 16:0_18:0	0.979477	0.709196	1.00498	0.938938	1.08263	0.283577	1.14982	0.044856	0.985169	0.819049
	PC 34:2|PC 16:0_18:2	1.0763	0.0140236	1.09677	0.0989246	1.23222	0.00131848	1.42954	2.41052e-05	1.16927	0.00624016
	PC 34:3	1.39965	0.0331064	1.47527	0.0644818	1.41948	0.00673103	1.41263	0.0129599	1.21834	0.0323368
	PC 35:2	1.12605	0.0304225	1.10048	0.220923	1.09276	0.135029	1.18134	0.0615195	1.05291	0.452534
	PC 36:3|PC 18:1_18:2	1.00333	0.91581	1.07526	0.185127	1.0865	0.0607524	1.15844	0.000383277	1.04353	0.152451
	PC 38:4|PC 18:0_20:4	0.950222	0.122579	1.0589	0.380757	1.09379	0.156356	1.0713	0.0286595	0.970444	0.550323
	PC 40:8|PC 18:2_22:6	1.33834	0.0068262	1.36035	0.0311609	1.40373	0.00547322	1.55217	0.00451941	1.35899	0.0100869
	PC 42:8	0.961162	0.262974	1.06442	0.195641	1.07144	0.0192363	1.11405	0.0303232	1.09933	0.0753095
	PC O-36:5	1.06085	0.473756	1.04431	0.399616	1.19986	0.0263517	1.13023	0.154902	1.0533	0.54368
	PC O-38:6	1.16527	0.341373	1.12827	0.233654	1.17528	0.0951426	1.18173	0.0157233	1.01064	0.701552
	PC O-40:4	1.09539	0.280891	1.30899	0.0598945	1.19392	0.0310952	1.21515	0.00701023	1.07935	0.248522
	PC O-40:7	1.14121	0.0645297	1.1218	0.0582174	1.12382	0.0209216	1.14903	0.0171764	0.941608	0.246557
	PE 36:3|PE 18:1_18:2	1.06033	0.177339	1.04699	0.315901	1.14811	0.0455716	1.27238	0.000594742	1.10352	0.0722212
	PE 40:9|PE 18:3_22:6	1.1571	0.149504	0.91985	0.38864	1.20535	0.0302402	1.26696	0.0742493	1.08534	0.436433
	PE P-32:0|PE P-16:0_16:0	1.27227	0.115798	1.17638	0.162397	1.52354	0.0137122	1.82068	0.044968	1.15689	0.146657
	PE P-40:8|PE P-18:2_22:6	1.15017	0.144169	1.09479	0.265383	1.13936	0.0453287	1.29997	0.0198253	1.18387	0.0450772
	PG 40:8|PG 18:2_22:6	1.3046	0.0677831	1.29171	0.1101	1.38231	0.0391618	1.45518	0.0711949	1.27823	0.0399373
	TG 56:10|TG 18:2_18:3_20:5	2.36014	0.019029	1.34131	0.684707	0.525373	0.241907	0.679783	0.287895	0.929316	0.6837
	TG 59:1|TG 16:0_25:0_18:1	2.32481	0.192071	3.50928	0.129642	3.79677	0.0390901	1.95247	0.282343	2.23144	0.187268
	TG 59:11|TG 16:0_21:5_22:6	2.71482	0.0269518	2.62472	0.067727	1.5445	0.504633	1.69583	0.359708	0.374076	0.289715
	TG 60:14|TG 18:3_20:5_22:6	2.90181	0.0360379	2.81099	0.144474	0.640343	0.503785	0.579352	0.463594	1.97131	0.165143
	TG 62:14|TG 18:2_22:6_22:6	1.92037	0.0925669	2.51838	0.0312343	1.05281	0.877659	0.911375	0.729294	1.60726	0.157918
	TG 68:3|TG 18:1_18:1_32:1	1.33212	0.708619	4.4593	0.0605434	3.00173	0.0425033	1.1668	0.646158	0.697338	0.588834
	DG 27:5	0.98892	0.839501	1.64039	0.0250214	1.07506	0.242692	1.05192	0.391871	1.63216	0.00223287
	DG 38:6|DG 16:0_22:6	1.20717	0.268092	1.40284	0.0169475	1.28973	0.0600377	1.17708	0.071277	0.93257	0.451586
	DG 40:6|DG 18:0_22:6	1.16158	0.342768	1.34186	0.0478325	1.12273	0.268936	0.963278	0.719602	1.01683	0.880581
	DG 48:6	1.13422	0.68147	1.81653	0.00146261	1.70018	0.00597467	1.63547	0.00311028	1.92449	0.00373314
	FA 20:5	1.19576	0.199072	1.34797	0.061167	1.11119	0.242099	1.36629	0.0450584	1.21489	0.113273
	LPC 21:0	0.96404	0.664103	1.00411	0.980252	0.818907	0.0200683	0.694539	0.00495062	1.06452	0.586247
	LPE 18:2	1.17404	0.173207	1.54958	0.0473189	1.24664	0.0184532	1.23865	0.0171237	1.96503	0.00132545
	LPE 20:2	1.16211	0.195183	1.81285	0.0531866	1.26927	0.0467494	1.00214	0.973753	2.28434	0.000517891
	NAE 16:2	1.06147	0.897528	3.60413	0.0735695	2.92193	0.0100496	3.28765	0.00161416	1.82162	0.143142
↓	CE 18:1	1.01041	0.97713	1.13841	0.68665	0.705052	0.357649	0.468968	0.035362	0.826075	0.504298
	CL 84:19|CL 18:1_22:6_22:6_22:6	1.14582	0.281298	0.672568	0.17539	0.70448	0.0554893	0.77782	0.0491523	0.90763	0.495883
	DG 30:8	0.932855	0.0161689	1.02552	0.604898	0.958376	0.158392	0.946879	0.0205533	0.991356	0.700595
	DG 51:6	1.45834	0.279292	0.897101	0.538537	0.563944	0.0893899	0.413436	0.011065	0.926973	0.744064
	LPC 16:0	0.978147	0.615407	1.0058	0.939687	0.892154	0.182796	0.841811	0.01902	1.0469	0.433195
	LPC 16:1	0.802736	0.140197	0.85908	0.41965	0.885038	0.440898	0.804502	0.0422424	0.497026	0.000193727
	LPC 18:0	0.974134	0.65671	1.00154	0.982177	0.888635	0.174874	0.81559	0.025689	1.07147	0.28384
	LPC 18:1	0.989811	0.842489	1.05327	0.516775	0.877598	0.177161	0.815594	0.0196343	1.05723	0.29722
	LPC 20:0	0.724726	0.0622086	1.30665	0.0721069	0.926195	0.449836	0.717838	0.0426689	0.997251	0.988884
	LPC 20:1	0.970842	0.753206	1.18246	0.30009	0.936924	0.365612	0.811094	0.0316716	1.127	0.324246
	LPC 27:0	1.05306	0.521702	0.810897	0.203024	0.86274	0.0357396	0.779188	0.0189104	1.02043	0.765398
	LPE 20:0	0.933197	0.186691	1.1387	0.274204	0.938934	0.424672	0.814796	0.0151682	1.15657	0.048267
	LPE 20:1	0.846985	0.169303	1.07472	0.464627	0.932844	0.595717	0.735875	0.0169934	1.00628	0.956421
	LPE O-18:1	0.979935	0.646693	0.954178	0.591928	0.876177	0.12595	0.842308	0.0253912	0.947041	0.265632
	NAE 18:1	0.976024	0.831186	1.06807	0.731769	0.749674	0.0736666	0.701969	0.0450518	0.9972	0.982801
	PC 30:1|PC 14:0_16:1	1.14281	0.302623	1.03047	0.747495	0.832432	0.0382157	0.74908	0.00994603	1.01076	0.893072
	PC 31:1|PC 15:0_16:1	1.07693	0.585488	1.07599	0.663888	0.847936	0.0322208	0.876259	0.0514768	0.969426	0.610064
	PC 36:4|PC 16:0_20:4	0.937699	0.0321794	1.01676	0.714835	1.00402	0.884296	1.01279	0.506135	0.94933	0.130249
	PC 36:5	0.946868	0.599619	1.13581	0.342553	0.853435	0.0449795	0.792609	0.0229827	1.04326	0.628469
	PC 36:6|PC 14:0_22:6	1.15595	0.31461	1.24733	0.248414	0.883815	0.075617	0.818932	0.011674	1.2069	0.0942243
	PC 38:5	0.968254	0.0371871	1.02718	0.435783	0.979444	0.30585	0.95162	0.00807711	0.956695	0.0786827
	PC 38:7	1.08521	0.409204	1.11345	0.295211	0.814202	0.00709367	0.762565	0.0016037	1.16138	0.118456
	PC 42:9	0.969228	0.497205	1.16064	0.208257	0.883258	0.0196001	0.852764	0.0368903	1.15561	0.120898
	PC 44:12|PC 22:6_22:6	1.0272	0.408785	1.06544	0.405454	0.871774	0.0193248	0.855508	0.00328219	1.12927	0.074017
	PC 46:10	0.837267	0.00799362	1.09964	0.182638	0.953168	0.587223	0.864067	0.0554245	1.02745	0.760836
	PC 46:12	1.01105	0.864866	0.812607	0.41267	0.92463	0.0808681	0.880958	0.0324249	1.07566	0.196307
	PC 50:6	0.998432	0.988859	1.0606	0.714197	0.863374	0.167879	0.696073	0.00952078	1.08351	0.478988
	PC 54:7	1.00748	0.908547	1.12113	0.449555	0.849937	0.1007	0.719931	0.016707	1.14026	0.316463
	PC 56:12	1.06885	0.522284	1.24581	0.228575	0.75286	0.080535	0.678075	0.0196905	1.17279	0.352433
	PC 58:12	1.10189	0.0208324	1.19031	0.291266	0.905118	0.286422	0.812738	0.00453165	1.13768	0.273622
	PC 60:12|PC 30:6_30:6	1.08046	0.229582	1.22442	0.229808	0.888012	0.199701	0.819021	0.0345145	1.1737	0.224435
	PC O-29:1	1.05034	0.208208	0.995232	0.961738	0.979208	0.699939	0.8085	0.0183344	1.04742	0.357938
	PE 19:1	0.790195	0.145605	0.851573	0.306702	0.94822	0.675912	0.650174	0.00429121	0.430025	0.000292441
	PE 21:1	0.766847	0.121798	0.891064	0.379601	0.937867	0.657911	0.623188	0.0026737	0.448415	0.000198648
	PE 21:3	0.835504	0.235959	0.908885	0.592999	0.892749	0.489715	0.76181	0.0282891	0.441249	0.000294306
	PE 23:4	0.765404	0.176733	0.874454	0.390565	0.910492	0.392315	0.721808	0.0171844	0.47323	0.000673823
	PE 32:1|PE 16:0_16:1	0.908872	0.176967	0.865953	0.0723342	0.708979	0.00445156	0.694678	0.00128873	0.878257	0.0303359
	PE 32:2|PE 16:1_16:1	0.992818	0.976947	0.994671	0.973161	0.545274	0.00541508	0.550135	0.00963311	1.08	0.588756
	PE 33:1|PE 16:0_17:1	1.01853	0.838672	1.06604	0.508173	0.808258	0.00545816	0.785825	0.00249959	1.03709	0.579275
	PE 34:1|PE 16:0_18:1	1.0248	0.607321	1.02985	0.601341	0.858358	0.0165591	0.787547	0.00232872	1.08109	0.142467
	PE 34:2|PE 16:0_18:2	1.00575	0.923969	0.974619	0.581267	0.8964	0.110314	0.890903	0.00851574	1.03259	0.342286
	PE 34:4|PE 16:1_18:3	1.96699	0.451628	0.611448	0.220341	0.759208	0.513644	0.237311	0.0313386	1.09965	0.765913
	PE 36:4|PE 16:0_20:4	0.927367	0.146575	0.964457	0.535214	0.873426	0.0592523	0.863987	0.0192361	0.925115	0.140506
	PE 36:4|PE 18:2_18:2	0.939125	0.148873	0.972964	0.630764	0.880666	0.0591306	0.854506	0.00931374	0.925986	0.116431
	PE 36:5|PE 16:1_20:4	0.936014	0.514001	1.02483	0.798863	0.668428	0.000343529	0.559873	6.45023e-05	1.00073	0.990779
	PE 36:6|PE 14:0_22:6	1.29521	0.200834	1.12501	0.516811	0.809782	0.0574449	0.592323	0.00224114	1.13976	0.357826
	PE 37:4|PE 17:0_20:4	1.07047	0.592126	1.0741	0.462067	0.912349	0.0862276	0.851903	0.0120337	1.0587	0.268219
	PE 38:7|PE 16:1_22:6	1.09099	0.328882	1.08664	0.20931	0.89178	0.000705209	0.837399	0.00282099	1.0587	0.390738
	PE 40:10|PE 20:5_20:5	0.970032	0.31384	1.39909	0.226232	0.981008	0.480625	0.849866	0.0263711	1.00867	0.855425
	PE 46:12	1.02214	0.583469	1.12865	0.245535	0.932143	0.263566	0.876969	0.0167054	1.07785	0.245876
	PE O-37:6|PE O-17:2_20:4	1.03458	0.573777	1.14604	0.214925	0.910596	0.0258894	0.8554	0.00357416	1.07464	0.0995594
	PG 34:1|PG 16:0_18:1	1.0958	0.4473	1.48471	0.172047	0.835825	0.0636422	0.774939	0.0214111	1.23321	0.057233
	PI 36:1	0.934911	0.201966	1.07379	0.202025	0.949407	0.414944	0.833674	0.0316596	0.989677	0.871496
	PI 36:2	1.07097	0.130979	1.14694	0.231923	0.842737	0.00931402	0.841842	0.00154903	1.19289	0.0493108
	PI 36:4|PI 16:0_20:4	0.973601	0.827494	0.715554	0.17259	0.848076	0.0848348	0.789761	0.0387527	1.08312	0.308717
	PI 36:5	0.971027	0.85868	0.918022	0.456879	0.795213	0.135897	0.652304	0.0240357	1.39259	0.0552576
	PS 32:1|PS 16:0_16:1	0.833464	0.316839	0.528467	0.0909909	0.801001	0.0276442	0.503406	0.000326925	0.622702	0.100003
	PS 42:8	1.04249	0.516337	0.672352	0.184643	0.886067	0.235631	0.802063	0.048057	1.03095	0.755847
	PS 44:10|PS 22:4_22:6	0.97649	0.685129	0.65354	0.173849	0.903724	0.120136	0.766882	0.0240774	0.939862	0.421405
	PS 46:11|PS 24:5_22:6	1.00688	0.912612	0.667355	0.148991	0.85679	0.0500688	0.744079	0.0102588	1.01433	0.887229
	PS 46:12|PS 22:6_24:6	1.00793	0.930156	0.698751	0.177568	0.865984	0.0759402	0.781906	0.00929681	1.06154	0.598596
	SM 32:1;2O	1.07032	0.240838	1.03435	0.713593	0.892936	0.0966251	0.790326	0.0215618	1.03352	0.605848
	SM 32:2;2O	0.916136	0.662562	0.797192	0.332886	0.707809	0.10307	0.552749	0.0200025	0.738999	0.217715
	SM 36:2;2O|SM 18:1;2O/18:1	0.8739	0.404814	0.883163	0.0373305	0.933351	0.154981	0.926174	0.112596	0.872635	0.0341693
	SM 36:3;2O	0.872561	0.28752	1.02292	0.865254	0.881268	0.0757194	0.711798	0.0244109	0.880224	0.138191
	SM 40:7;2O|SM 18:2;2O/22:5	1.04693	0.507006	1.19236	0.215293	0.924737	0.208925	0.872701	0.0243633	1.14269	0.0982613
	SM 41:3;2O	1.13997	0.608615	0.535723	0.017417	1.41016	0.218469	0.947048	0.90489	1.20206	0.396566
	TG 36:0|TG 10:0_12:0_14:0	0.602823	0.4073	0.64054	0.490554	0.642096	0.335364	0.175967	0.0420714	0.374307	0.112477
	TG 38:1|TG 8:0_12:0_18:1	0.71045	0.579129	0.145194	0.0537046	0.177577	0.0599822	0.0696606	0.0402293	0.402435	0.154014
	TG 42:0|TG 12:0_14:0_16:0	0.368843	0.0486304	0.331408	0.0559919	0.486385	0.0674742	0.220724	0.0161359	0.276517	0.0251645
	TG 42:1|TG 8:0_16:0_18:1	0.593379	0.133795	0.405883	0.0171537	0.600706	0.139346	0.274209	0.00930741	0.570038	0.0580034
	TG 44:0|TG 14:0_14:0_16:0	0.599356	0.237037	0.382834	0.0476736	0.318272	0.034034	0.0844851	0.010264	0.343884	0.0382922
	TG 44:1|TG 10:0_16:0_18:1	0.590058	0.208783	0.150257	0.00464106	0.118179	0.00377884	0.054926	0.00259323	0.075363	0.00284999
	TG 44:2|TG 10:0_16:0_18:2	0.51303	0.121996	0.132866	0.00399325	0.105083	0.00282558	0.0688469	0.00217571	0.116636	0.00278832
	TG 46:1|TG 14:0_16:0_16:1	0.762984	0.524158	0.285496	0.0292915	0.229147	0.0243251	0.114497	0.0127804	0.286389	0.0300335
	TG 46:2|TG 12:0_16:0_18:2	0.683441	0.411468	0.147974	0.0138606	0.11735	0.0142449	0.0830941	0.0103916	0.10611	0.0113292
	TG 48:1|TG 14:0_16:0_18:1	0.838694	0.694092	0.328124	0.0558308	0.26506	0.0423005	0.178566	0.0279134	0.376215	0.072281
	TG 48:2|TG 14:0_16:0_18:2	0.733557	0.518056	0.185601	0.0373815	0.183175	0.0382266	0.135986	0.0305941	0.21153	0.0421834
	TG 48:3|TG 14:0_16:1_18:2	0.636096	0.371847	0.143378	0.0318324	0.138389	0.0322792	0.0987568	0.0269961	0.145583	0.0326738
	TG 49:2|TG 15:0_16:0_18:2	0.638081	0.334067	0.0828508	0.00995818	0.150166	0.0168238	0.108978	0.0117865	0.146163	0.0134485
	TG 50:1|TG 16:0_16:0_18:1	0.847068	0.611852	0.514075	0.068179	0.375738	0.0305672	0.285378	0.0181329	0.545406	0.0875567
	TG 50:2|TG 16:0_16:1_18:1	0.68321	0.442777	0.192064	0.0382261	0.204805	0.0425221	0.169036	0.0357312	0.268951	0.055283
	TG 50:3|TG 16:0_16:1_18:2	0.636025	0.389269	0.141424	0.036787	0.16385	0.041762	0.137458	0.0368291	0.174354	0.0424582
	TG 50:4|TG 16:1_16:1_18:2	0.584369	0.298751	0.12456	0.0269966	0.1598	0.0331726	0.14697	0.0303043	0.148982	0.0299161
	TG 51:1|TG 16:0_17:0_18:1	0.803327	0.44691	0.472152	0.0281338	0.432358	0.0304162	0.338234	0.0128291	0.478466	0.0284306
	TG 51:2|TG 16:0_17:1_18:1	0.663826	0.360573	0.222544	0.025916	0.221895	0.0292812	0.219167	0.0278312	0.290802	0.035975
	TG 51:3|TG 15:0_18:1_18:2	0.534866	0.271382	0.071149	0.0263301	0.1411	0.040214	0.137863	0.0363644	0.127739	0.0341892
	TG 51:4|TG 15:0_18:2_18:2	0.491774	0.353829	0.0309752	0.0414138	0.0441646	0.0438281	0.0732381	0.0484302	0.0748321	0.0484395
	TG 52:1|TG 16:0_18:0_18:1	0.894974	0.534225	0.790338	0.192757	0.539333	0.0133101	0.425526	0.00478475	0.813693	0.245368
	TG 52:2|TG 16:0_18:1_18:1	0.716637	0.40991	0.373386	0.0495191	0.331742	0.0427124	0.278099	0.0332741	0.422384	0.068059
	TG 52:3|TG 16:0_18:1_18:2	0.584095	0.303208	0.158996	0.0276825	0.208183	0.0378015	0.207789	0.0369478	0.239447	0.04083
	TG 52:4|TG 16:0_18:2_18:2	0.530323	0.279843	0.100621	0.0274205	0.162964	0.0383972	0.169107	0.0383272	0.171927	0.0376966
	TG 52:5|TG 16:1_18:2_18:2	0.553792	0.281007	0.17984	0.0350409	0.180795	0.0342576	0.187064	0.0351511	0.217682	0.0393102
	TG 52:6|TG 16:1_18:2_18:3	0.965685	0.877002	0.908953	0.623633	0.487715	0.00912143	0.427816	0.00701021	0.67698	0.0650272
	TG 53:2|TG 16:0_18:1_19:1	0.697891	0.43379	0.293811	0.0403557	0.274992	0.0458041	0.27038	0.0409987	0.396426	0.066994
	TG 53:3|TG 17:0_18:1_18:2	0.559605	0.284327	0.110807	0.0234583	0.159624	0.0336975	0.184483	0.0381627	0.188464	0.0342307
	TG 53:4|TG 17:1_18:1_18:2	0.527786	0.276786	0.0680735	0.0192918	0.129405	0.0280218	0.161216	0.0326704	0.121543	0.02479
	TG 53:5|TG 17:1_18:2_18:2	0.433272	0.23643	0.0559043	0.0372595	0.115654	0.0501978	0.107106	0.0460128	0.0658144	0.0388399
	TG 53:6|TG 17:1_18:2_18:3	0.96004	0.767064	1.27359	0.365493	0.906931	0.572799	0.617275	0.019623	1.01874	0.941768
	TG 54:1|TG 16:0_18:0_20:1	0.949083	0.695845	0.896306	0.434073	0.636559	0.0177734	0.537093	0.00627801	0.985733	0.917239
	TG 54:2|TG 18:0_18:1_18:1	0.777805	0.410911	0.575721	0.0875576	0.467998	0.0472339	0.388896	0.0298967	0.603678	0.116654
	TG 54:3|TG 18:0_18:1_18:2	0.611992	0.320828	0.256716	0.0426985	0.280506	0.0511443	0.260596	0.0484174	0.31205	0.0572855
	TG 54:5|TG 18:1_18:2_18:2	0.515313	0.211603	0.141686	0.0180066	0.184532	0.0248659	0.209212	0.0284166	0.199795	0.0241715
	TG 54:6|TG 18:1_18:2_18:3	0.80863	0.378457	0.630901	0.0727706	0.42422	0.0136158	0.375298	0.00986878	0.592508	0.0497264
	TG 55:3|TG 18:1_18:1_19:1	0.585914	0.333031	0.121735	0.0331143	0.157695	0.0413015	0.230343	0.0622736	0.207378	0.0499635
	TG 55:4|TG 18:1_19:1_18:2	0.488216	0.291011	0.076068	0.0323184	0.185247	0.0585564	0.215551	0.0692814	0.144145	0.0439334
	TG 56:1|TG 16:0_22:0_18:1	0.864186	0.489405	0.894756	0.50769	0.685756	0.061702	0.57682	0.0227976	0.8664	0.395904
	TG 56:2|TG 18:0_18:1_20:1	0.871639	0.537233	0.77008	0.218302	0.59505	0.0568426	0.531577	0.0421567	0.757455	0.235206
	TG 56:3|TG 18:1_18:1_20:1	0.879464	0.601611	0.730262	0.171269	0.558823	0.0485578	0.493986	0.0341505	0.714563	0.160272
	TG 56:4|TG 18:1_20:1_18:2	0.864637	0.473038	0.768844	0.149138	0.635812	0.0417165	0.560583	0.0190162	0.789277	0.188678
	TG 56:5|TG 18:1_18:2_20:2	0.93363	0.632772	0.892656	0.403816	0.676688	0.026659	0.598149	0.0124175	0.824329	0.168941
	TG 56:6|TG 16:0_18:1_22:5	1.00995	0.919641	1.05047	0.674208	0.70373	0.00801928	0.602247	0.00259232	0.960377	0.652286
	TG 57:1|TG 16:0_23:0_18:1	1.06189	0.868364	0.966506	0.893287	0.626071	0.148018	0.467935	0.0366593	0.761087	0.280237
	TG 57:2|TG 16:0_23:0_18:2	0.63966	0.276157	0.511208	0.0752265	0.327698	0.0275743	0.369253	0.0407297	0.380597	0.0596198
	TG 58:10|TG 18:2_18:2_22:6	1.07308	0.408495	1.26252	0.250614	0.773557	0.00352723	0.718767	0.0155017	1.04917	0.650361
	TG 58:12|TG 18:2_18:4_22:6	1.14569	0.494777	1.32412	0.140137	0.62222	0.0406447	0.466061	0.000856509	0.862765	0.176356
	TG 58:2|TG 16:0_18:1_24:1	0.90776	0.728393	0.769243	0.235799	0.524071	0.0308869	0.396622	0.0153414	0.665725	0.106587
	TG 58:2|TG 22:0_18:1_18:1	0.861456	0.573153	0.813224	0.346035	0.561685	0.044784	0.432144	0.0263076	0.7001	0.126609
	TG 58:3|TG 18:1_18:1_22:1	0.871916	0.645284	0.63896	0.0804064	0.477767	0.0327024	0.377603	0.0229548	0.60446	0.0828662
	TG 58:3|TG 22:0_18:1_18:2	0.955229	0.89481	0.649772	0.197428	0.476319	0.0830857	0.335461	0.0410077	0.581	0.157985
	TG 58:5|TG 18:0_18:1_22:4	0.969286	0.749846	1.01983	0.84457	0.801256	0.0736993	0.643584	0.00821545	0.98182	0.867786
	TG 58:6|TG 18:1_18:1_22:4	1.02083	0.804001	1.03527	0.720555	0.736858	0.0216588	0.68508	0.00528354	0.968494	0.693996
	TG 58:9|TG 18:1_18:2_22:6	0.915047	0.583372	0.874336	0.428532	0.607558	0.0165418	0.631186	0.0207198	0.774202	0.132429
	TG 60:12|TG 16:0_22:6_22:6	1.18618	0.0928905	1.21402	0.197818	0.719426	0.000689288	0.638717	0.000899031	1.00166	0.97654
	TG 60:13|TG 18:2_20:5_22:6	1.30519	0.11941	1.39148	0.134381	0.748996	0.0164775	0.609587	0.00946419	1.04958	0.724043
	TG 60:2|TG 24:0_18:1_18:1	0.990937	0.981039	0.9365	0.831689	0.474255	0.105955	0.260901	0.0364404	0.68787	0.30123
	TG 60:4|TG 18:1_24:1_18:2	0.428489	0.230429	0.122558	0.0439642	0.224787	0.0646277	0.113039	0.041703	0.220392	0.0741923
	TG 62:13|TG 18:1_22:6_22:6	1.19166	0.0634288	1.34856	0.0485207	0.896595	0.230111	0.795218	0.0427221	1.13158	0.179985
	TG 64:16|TG 20:4_22:6_22:6	0.956272	0.802557	1.11747	0.774295	0.487751	0.00340163	0.664744	0.0673993	0.974993	0.873566

## Sheet: Liver
Supplementary Table 16. Statistics of differential lipids in each period of fasting in Liver.
FC: fold change, the ratio of metabolite level in each period pf fasting to that of Ctrl.
“↑”：Lipid that incresed after short-term fasting.
“↓”：Lipid that decreased after short-term fasting.
#DIV/0!: Lipids that could not detected in Ctrl, bot increased after STF.
	Lipid	F-3h vs. Ctrl		F-6h vs. Ctrl		F-12h vs. Ctrl		F-24h vs. Ctrl		Ref vs. Ctrl
		FC(F-3h/Ctrl)	p value	FC(F-6h/Ctrl)	p value	FC(F-12h/Ctrl)	p value	FC(F-24h/Ctrl)	p value	FC(Ref/Ctrl)	p value
↑	BMP 42:10|BMP 20:4_22:6	1.80921	0.0656941	1.74029	0.0418664	1.49522	0.0497048	1.14969	0.391232	1.16561	0.346629
	CAR 14:0	2.06594	0.016894	1.86218	0.13676	2.06416	0.0457209	1.53696	0.190032	1.90075	0.0878614
	Cer 36:0;2O|Cer 18:0;2O/18:0	4.29095	0.00185343	3.95438	0.000861338	4.99848	0.0526561	4.28065	0.000128939	2.61668	0.00168524
	Cer 36:1;2O|Cer 18:1;2O/18:0	3.13083	0.0075495	3.22211	0.000159447	3.02626	0.00992032	2.92359	0.000576482	2.1772	2.50917e-05
	Cer 37:1;2O|Cer 18:1;2O/19:0	1.96574	0.000309391	1.79073	0.00476395	1.81542	0.000566697	1.86075	0.00126256	1.50726	0.0029518
	Cer 38:1;2O|Cer 18:1;2O/20:0	2.01734	0.00379629	1.74848	0.00309883	1.42192	0.00828323	1.33642	0.051575	1.91553	0.00100955
	Cer 38:2;2O|Cer 18:2;2O/20:0	2.05349	0.00267446	1.80445	0.016338	1.55778	0.00511579	1.34304	0.063866	1.35523	0.112296
	Cer 40:1;2O|Cer 18:1;2O/22:0	1.72535	0.0151523	1.51115	0.133278	1.08583	0.680705	0.788721	0.27577	1.36729	0.141947
	Cer 40:3;2O|Cer 18:1;2O/22:2	1.47493	0.014548	1.53278	0.0312358	0.972287	0.738591	0.787576	0.00979922	1.32451	0.0618031
	Cer 41:0;4O|Cer 17:0;3O/24:0;(2OH)	1.8808	0.0043467	1.57101	0.0330979	1.21533	0.133792	0.904183	0.482774	1.18256	0.327217
	Cer 41:1;2O|Cer 18:1;2O/23:0	1.70565	0.0224913	1.45819	0.213409	1.01646	0.945166	0.763529	0.316302	0.887148	0.627489
	Cer 42:2;2O|Cer 18:1;2O/24:1	1.98759	0.0038326	1.79631	0.0328072	1.45282	0.0976497	1.26422	0.208068	0.941294	0.759064
	Cer 42:3;2O|Cer 18:2;2O/24:1	1.51304	0.0220917	1.33564	0.205444	1.04337	0.804977	0.991631	0.963651	0.838487	0.390672
	Cer 43:1;3O|Cer 18:1;2O/25:0;O	1.34774	0.0294205	1.2108	0.244	0.820234	0.200733	0.742055	0.0792061	0.885969	0.405879
	Cer 44:1;3O|Cer 20:1;2O/24:0;O	1.49476	0.0383504	1.38851	0.25663	0.880785	0.568634	0.680161	0.121684	0.876807	0.534241
	Cer 45:2;3O|Cer 18:1;2O/27:1;O	1.48559	0.00601726	1.40065	0.0668358	0.962288	0.778274	0.867604	0.301009	0.858432	0.388041
	CL 72:4|CL 18:1_18:1_18:1_18:1	2.21883	0.00019654	0.266555	0.0201767	2.38814	1.63188e-05	2.56542	0.000201242	1.68048	0.016189
	CL 72:5|CL 18:1_18:1_18:1_18:2	1.35223	0.0333607	0.283464	0.0417648	1.49178	0.00807824	1.47342	0.00781091	1.16974	0.313294
	DG 30:1|DG 14:0_16:1	1.75477	0.376114	0.934424	0.879844	1.92369	0.0686188	2.59109	0.0235168	0.53161	0.218366
	DG 32:0|DG 16:0_16:0	1.40748	0.351972	1.49294	0.306039	1.89363	0.0466988	1.94901	0.0668598	2.12183	0.0247393
	DG 32:2|DG 14:0_18:2	1.42519	0.396385	1.21365	0.583163	2.46702	0.0116883	3.74971	0.00357711	1.24237	0.470445
	DG 33:2|DG 15:0_18:2	1.27884	0.464212	1.39008	0.325216	2.56983	0.00724152	3.04537	0.00518457	1.78635	0.0755877
	DG 34:1|DG 16:0_18:1	0.940145	0.832562	1.34303	0.33737	1.68379	0.0400898	1.72986	0.0526707	2.39842	0.00179316
	DG 34:2|DG 16:0_18:2	1.80819	0.0313259	2.31396	0.00443087	3.8712	9.16209e-05	4.27819	4.06457e-05	2.91065	0.000670183
	DG 34:3|DG 16:1_18:2	1.66154	0.159267	1.74754	0.0174565	3.63861	0.00124953	4.06967	0.000615646	1.9529	0.0117791
	DG 34:4|DG 16:2_18:2	4.20937	0.00478674	3.92557	0.001792	7.94825	1.11808e-05	10.989	0.000217622	3.59606	0.0122144
	DG 35:2|DG 17:0_18:2	0.967194	0.912136	1.15081	0.653833	1.63201	0.0793969	2.15727	0.0329288	2.61797	0.00422385
	DG 35:3|DG 17:1_18:2	1.3439	0.211411	1.58614	0.0536275	2.53984	0.00332591	3.09131	0.0103034	2.1117	0.0109372
	DG 36:2|DG 18:1_18:1	0.849089	0.387199	1.44774	0.241464	1.33141	0.178482	1.96352	0.0336414	2.51773	0.0040061
	DG 36:3|DG 18:1_18:2	1.56118	0.107835	2.27013	0.00186422	2.49551	0.00231104	3.33761	0.00397555	2.86499	0.00177002
	DG 36:4|DG 16:0_20:4	1.73146	0.0830819	1.79058	0.0496757	1.82742	0.00442832	1.75918	0.0335453	1.9131	0.00217944
	DG 36:5|DG 18:2_18:3	2.3887	0.0063296	3.04935	0.000536828	4.13248	1.92527e-05	4.35113	0.0150406	2.29957	0.010195
	DG 37:3|DG 19:1_18:2	1.1479	0.569975	1.43714	0.183257	1.86501	0.0510653	3.04279	0.0162025	2.88189	0.00406008
	DG 38:5|DG 18:1_20:4	1.29516	0.219304	1.70639	0.00546524	2.09871	0.000360701	2.42724	0.00409205	2.95959	0.000615248
	DG 38:6|DG 16:0_22:6	2.04878	0.0248599	2.08963	0.012705	4.02061	0.000139491	4.39451	1.63749e-05	4.81638	3.47381e-06
	DG 38:7|DG 16:1_22:6	2.59261	0.0363221	3.01975	0.00102416	3.30678	0.000191492	3.80337	0.000521163	2.17317	0.00419009
	DG 40:6|DG 18:0_22:6	1.67186	0.0239728	1.7874	0.0470936	2.02194	0.00921729	2.4362	0.0211609	4.30093	1.75382e-05
	DG 40:7|DG 18:1_22:6	1.52123	0.0763749	2.17589	0.0102085	1.97869	0.0445264	2.58042	0.0331167	2.38782	0.00684477
	DG 40:8|DG 18:2_22:6	1.84715	0.0519543	2.86225	0.00396569	2.15626	0.00895922	3.28823	0.00881455	2.01999	0.0574517
	DG 41:1|DG 23:0_18:1	#DIV/0!	0.0253	#DIV/0!	0.285591	#DIV/0!	0.0821727	#DIV/0!	0.216175	#DIV/0!	#DIV/0!
	FA 12:0	1.00448	0.965505	0.985473	0.893661	1.13618	0.216218	1.6617	0.000967109	1.06164	0.630825
	FA 14:0	1.05197	0.674512	1.06876	0.73186	1.07567	0.551084	1.33746	0.0451807	0.95709	0.690882
	FA 15:4	1.17504	0.12781	1.08528	0.311477	1.21442	0.0164334	1.28606	0.00792766	1.12225	0.147179
	FA 16:0	1.30748	0.0158353	1.42692	0.0579868	1.31384	0.0870736	1.45415	0.0224574	1.44703	0.0063024
	FA 18:0	1.10968	0.128799	0.943145	0.590189	1.20511	0.0511106	1.30056	0.00652394	1.20193	0.0144417
	FA 18:2	1.77258	0.00495883	2.03674	0.00940941	1.65496	0.0218132	2.21426	0.000268415	1.97978	0.000536751
	FA 18:3	1.70793	0.00854907	1.92189	0.013485	1.61737	0.0405884	1.85401	0.00643049	1.39701	0.037092
	FA 19:0	1.07964	0.444731	0.963912	0.786541	1.05813	0.607405	1.4418	0.0373067	1.18053	0.0919412
	FA 20:0	1.25026	0.064989	0.796217	0.18301	1.13405	0.0569211	1.4723	0.000884473	1.25516	0.046358
	FA 20:4	1.47027	0.016094	1.37003	0.191643	1.12752	0.484965	1.2124	0.341998	1.43331	0.218439
	FA 20:5	2.14562	0.00379974	2.66147	0.00654098	1.76705	0.0733018	1.70873	0.0182079	1.30319	0.0607701
	FA 22:1	1.35923	0.0470256	1.2236	0.0414661	1.04533	0.597196	1.508	0.00220128	1.23259	0.0274573
	FA 22:6	1.48626	0.0223499	1.8265	0.0439024	1.20603	0.262284	1.38963	0.116515	1.75393	0.0275678
	FA 23:1	1.30321	0.105015	1.05715	0.803449	1.21367	0.282093	1.78168	0.00527241	1.23304	0.37111
	FA 24:1	0.930134	0.542321	1.22799	0.167072	1.08564	0.261246	1.33433	0.0103809	0.966941	0.696325
	FA 24:2	1.11875	0.0691908	1.09218	0.309401	1.08299	0.449138	1.51386	0.00132811	1.30203	0.13591
	FA 26:1	0.885812	0.425055	1.3283	0.61995	0.702081	0.117584	1.49576	0.0447773	1.06093	0.757645
	HexCer 44:2;3O|HexCer 18:1;2O/26:1;O	1.66583	0.0119718	1.74873	0.00346723	1.37638	0.0557662	1.50768	0.0299384	0.691991	0.059168
	LPC 25:0	1.32966	0.123969	1.46563	0.00670026	1.09036	0.427295	0.719899	0.0114829	0.580235	0.00438707
	NAE 13:0	1.02292	0.971932	1.48499	0.469341	1.76008	0.220462	3.26216	0.0061494	2.47222	0.274934
	NAE 16:0	1.3839	0.0496017	1.56067	0.0436873	1.29111	0.265417	1.3338	0.117372	1.05613	0.723958
	NAE 16:1	1.97131	0.000241845	2.183	0.00102353	1.85606	0.0189552	2.37816	0.000346032	1.96768	0.00342368
	NAE 16:2	1.26666	0.531614	1.0584	0.854651	1.26078	0.357961	2.19635	0.0355967	1.60475	0.289837
	NAE 17:1	2.56684	0.0748424	3.35918	0.0243629	2.72255	0.103727	2.75621	0.0260285	2.87581	0.0702299
	NAE 17:2	1.16649	0.0712585	1.41533	0.0123715	1.33399	0.0246596	1.36623	0.0730631	0.893291	0.683619
	NAE 18:0	1.825	0.00623552	1.64421	0.260613	1.00267	0.98925	1.13344	0.561473	1.11831	0.557398
	NAE 18:1	1.61424	0.0151573	1.7916	0.0476317	0.984433	0.931008	1.19873	0.213912	1.09793	0.484685
	NAE 18:3	1.3713	0.00677935	1.45257	0.0416092	1.27035	0.0826978	1.39023	0.0409862	1.26053	0.178278
	NAE 19:0	3.10849	0.0577454	3.4585	0.020605	4.17864	3.26926e-05	3.21551	0.00139938	1.52434	0.00668774
	NAE 20:0	1.20765	0.0513729	1.63374	0.000736814	1.10388	0.411088	1.30161	0.1752	1.07594	0.676676
	NAE 20:2	1.08299	0.731305	2.00663	0.0199191	0.951504	0.859007	1.11614	0.72798	0.826297	0.674648
	NAE 20:5	1.52677	0.0165744	1.85872	0.0402548	1.24983	0.133642	1.43898	0.0632503	1.647	0.038465
	NAE 21:1	3.95662	0.0440399	4.12866	0.00186442	5.12346	0.00010463	4.36537	0.00165945	1.20759	0.429491
	NAE 22:5	0.95555	0.816002	1.7101	0.0177647	0.958464	0.846353	1.14441	0.645931	0.879044	0.677856
	NAE 6:0	2.6846	0.326965	2.27037	0.0296767	1.22794	0.550948	0.926058	0.805953	1.60728	0.0935022
	PC 28:0|PC 14:0_14:0	1.4893	0.046954	0.971101	0.895193	0.911368	0.689949	0.929456	0.711043	0.558778	0.103514
	PC 30:2|PC 12:0_18:2	3.11887	0.00189531	1.77144	0.280792	1.96664	0.141767	2.09851	0.0218609	0.837386	0.648139
	PC 34:3	1.17549	0.0538427	0.949005	0.57047	1.23531	0.0264062	1.06199	0.383401	0.751528	0.0188263
	PC 42:0|PC 16:0_26:0	3.70197	0.0126605	1.45686	0.362655	4.00182	0.00872531	3.42779	0.00336316	1.01661	0.955002
	PC 44:1|PC 26:0_18:1	3.58676	0.0670481	1.57818	0.420182	4.53931	0.00405369	3.3007	0.0343552	0.832168	0.734187
	PC 45:4|PC 25:0_20:4	4.66492	0.00139238	3.20754	0.0447696	8.71269	0.00220584	11.1951	2.77149e-05	2.68897	0.168957
	PC 46:2	15.3933	0.0738912	7.84261	0.0384901	9.92688	6.42703e-05	10.5322	0.000116364	8.25012	0.0579082
	PC 50:4	4.00578	0.021458	1.18777	0.843459	2.30561	0.138018	2.14354	0.147771	1.21971	0.754796
	PC 50:6	3.43873	0.132362	5.95019	0.0193288	4.55682	0.061901	4.89909	0.0122119	2.85964	0.124122
	PC 52:6	#DIV/0!	0.000698257	#DIV/0!	0.285591	#DIV/0!	0.00972543	#DIV/0!	0.000902088	#DIV/0!	0.159507
	PC O-34:0	1.41061	0.0205819	1.18575	0.308147	1.06138	0.71787	0.838406	0.292361	0.972511	0.841009
	PC O-36:0	2.01141	0.00215902	1.58163	0.0589785	1.72515	0.0175501	2.01937	0.0185923	0.796223	0.202218
	PC O-36:1	1.31	0.0299867	1.12864	0.461664	1.09915	0.468907	0.900786	0.467385	0.81536	0.0955134
	PC O-36:5	1.12997	0.279984	1.08702	0.578795	1.22133	0.168784	1.3084	0.0270458	0.651415	0.0198104
	PC O-38:0	2.73025	0.00218115	2.27919	0.0672632	3.63946	0.000485831	4.90388	0.000442534	0.744262	0.387172
	PC O-40:4	1.4558	0.0441275	1.40904	0.0694091	1.3821	0.0805316	1.24614	0.16557	0.730735	0.115125
	PC O-40:6	1.21564	0.0576856	1.3724	0.0915666	1.67463	0.000548818	1.80869	0.000569247	0.749395	0.0112932
	PC O-40:7	1.18812	0.183689	1.28151	0.0980521	1.3027	0.033036	1.28969	0.0434416	0.657602	0.0159097
	PC O-41:1	1.299	0.0998742	1.0529	0.768234	1.41474	0.0119097	1.09706	0.384992	0.76855	0.079068
	PC O-42:2	4.93173	0.000757625	3.5733	0.115438	6.12238	0.000277232	9.70267	5.40423e-05	1.18312	0.831021
	PE 34:2|PE 16:0_18:2	1.19594	0.195721	0.897035	0.529207	1.59875	0.0276891	1.59447	0.00497405	0.534532	0.00712383
	PE 36:0|PE 18:0_18:0	1.33005	0.0475077	0.82295	0.333359	1.00914	0.936097	0.955384	0.718809	0.878597	0.278217
	PE 36:1|PE 18:0_18:1	1.3215	0.0454119	0.798863	0.26124	1.02073	0.859027	0.953702	0.698425	0.897068	0.336115
	PE 36:2|PE 18:1_18:1	1.34252	0.00913324	0.917638	0.494883	1.66137	0.00126894	1.89344	0.00168398	0.88146	0.0640131
	PE 36:3|PE 18:1_18:2	1.0249	0.757259	0.713302	0.0308499	1.14608	0.169583	1.30953	0.051824	0.561509	0.00086288
	PE 37:2|PE 18:1_19:1	1.47525	0.0397944	1.0145	0.954378	1.69405	0.0318147	1.88597	0.0151231	1.00417	0.979856
	PE 40:6|PE 18:0_22:6	1.47429	0.0526903	1.44859	0.0169597	1.42238	0.0439333	1.2778	0.0422717	1.4051	0.0170629
	PE O-39:5|PE O-17:1_22:4	1.47234	0.101663	1.42523	0.173007	2.11925	0.0121066	1.99638	0.0103066	1.54377	0.0090188
	PE O-39:5|PE O-19:1_20:4	1.97703	0.00483861	1.73828	0.107971	2.63516	0.00736516	2.48826	0.00596907	1.91979	0.00552302
	PE P-42:6|PE P-18:0_24:6	1.37396	0.0487846	1.10709	0.731409	1.28741	0.188684	1.41357	0.0515303	1.06048	0.756672
	PE P-42:6|PE P-20:0_22:6	1.37529	0.0489512	1.10782	0.730425	1.28848	0.18837	1.41531	0.0513582	1.06104	0.755258
	PE P-42:7|PE P-18:1_24:6	1.11992	0.0805778	0.959997	0.788699	1.19408	0.0599147	1.39088	0.000569095	0.701506	0.00218965
	PE P-42:7|PE P-20:1_22:6	1.09065	0.143775	0.962805	0.76403	1.15346	0.111819	1.34307	0.00138305	0.708746	0.00216192
	PG 36:2|PG 18:1_18:1-1	1.91714	0.00120557	1.37622	0.0169691	0.973265	0.853312	1.05376	0.651263	1.44472	0.0164586
	PG 40:8|PG 18:2_22:6	2.37307	0.00010035	1.72581	0.104473	2.14443	0.00375094	1.59988	0.00559425	1.18444	0.316192
	PS 41:6|PS 19:0_22:6	1.12257	0.607195	0.605974	0.161023	1.53322	0.0285012	1.42938	0.00572432	0.845162	0.68261
	SM 32:1;2O	1.2445	0.0779558	1.27102	0.0486875	1.27763	0.00629204	1.01934	0.823687	0.632279	0.00613145
	SM 34:2;2O|SM 18:2;2O/16:0	1.33786	0.0857444	1.30636	0.0500959	1.40578	0.0124942	1.34894	0.0348162	0.875655	0.294732
	SM 35:1;2O	1.19231	0.308019	1.19927	0.123779	1.14844	0.151114	1.32802	0.0324543	0.904602	0.411197
	SM 36:3;2O	2.63832	0.0813511	2.23136	0.0819236	4.80165	0.000224294	4.19628	0.00105336	1.23819	0.642743
	SM 38:1;2O|SM 18:1;2O/20:0	1.16794	0.182733	1.12345	0.396779	1.26842	0.0422684	1.12302	0.27313	0.978799	0.832339
	SM 40:7;2O|SM 18:2;2O/22:5	3.06892	0.00758396	3.10198	0.00270156	6.10518	3.07253e-06	7.40956	1.0153e-06	1.44238	0.0582176
	TG 40:0|TG 12:0_14:0_14:0	11.3342	0.0704303	1.6945	0.393677	16.0963	0.00110552	19.7927	8.86893e-05	1.43971	0.55693
	TG 40:1|TG 8:0_16:0_16:1	12.4869	0.177386	1.87624	0.443962	10.6165	0.000162576	11.4113	6.90073e-05	1.97077	0.45189
	TG 40:2|TG 8:0_14:0_18:2	8.12422	0.20919	1.73508	0.50011	6.87559	0.00117381	8.92673	0.000230283	1.6404	0.517551
	TG 41:2|TG 8:0_15:0_18:2	4.15991	0.131805	2.31589	0.198157	5.20955	0.00716514	5.98704	0.00115077	1.485	0.534205
	TG 42:0|TG 12:0_14:0_16:0	11.8345	0.0159726	4.30784	0.10874	17.9399	0.000324619	19.5053	1.14073e-06	3.6311	0.132958
	TG 42:1|TG 8:0_16:0_18:1	12.7861	0.00862201	5.95168	0.0725887	32.6908	2.61753e-05	38.0713	7.76412e-05	4.0109	0.0892058
	TG 42:2|TG 8:0_16:0_18:2	32.4658	0.00947003	7.65296	0.104073	74.1631	3.32618e-05	93.4766	2.98444e-05	7.82363	0.106327
	TG 42:3|TG 8:0_16:1_18:2	22.7833	0.00829826	8.23468	0.146708	51.9912	4.49506e-05	70.7844	0.000264781	5.95853	0.150063
	TG 42:4|TG 8:0_16:2_18:2	2.89284	0.210139	1.03817	0.96879	4.70112	0.00732777	7.48986	0.00093028	1.42745	0.630083
	TG 43:2|TG 9:0_16:0_18:2	29.4561	0.0093148	8.88769	0.139503	57.1623	4.135e-07	75.9906	1.73324e-05	13.5452	0.0974946
	TG 44:1|TG 10:0_16:0_18:1	14.1612	0.0102628	6.76815	0.0558534	22.7495	7.03486e-05	23.728	1.39052e-07	5.19961	0.0880947
	TG 44:2|TG 10:0_16:0_18:2	32.0561	0.00860182	15.9749	0.077942	106.847	2.11062e-05	148.16	2.79196e-05	12.9468	0.0617378
	TG 44:3|TG 10:0_16:1_18:2	47.1777	0.0184254	22.005	0.0632004	183.812	1.76532e-05	278.122	6.06108e-05	22.5732	0.0587643
	TG 44:4|TG 10:0_16:1_18:3	38.2761	0.00432575	16.8255	0.0574193	102.897	1.67408e-05	154.125	0.000217958	12.8882	0.0666929
	TG 44:4|TG 8:0_18:2_18:2	25.8364	0.00453773	11.4423	0.0624733	70.1496	1.8422e-05	105.203	0.000251514	8.74675	0.0782323
	TG 45:1|TG 14:0_15:0_16:1	3.66063	0.0752059	1.67877	0.43452	3.17628	0.0326285	3.09289	0.0308238	2.40066	0.127123
	TG 45:2|TG 11:0_16:0_18:2	24.7926	0.0094507	13.6279	0.0595893	58.0788	3.16916e-06	75.6926	1.53216e-06	11.5213	0.0672874
	TG 45:4|TG 9:0_18:2_18:2	#DIV/0!	0.0257279	#DIV/0!	0.102987	#DIV/0!	6.21999e-06	#DIV/0!	1.42164e-05	#DIV/0!	0.0759488
	TG 46:2|TG 12:0_16:0_18:2	17.9476	0.00699607	10.1591	0.0524084	30.9772	2.94843e-05	35.0979	7.51437e-07	9.96683	0.0440179
	TG 46:3|TG 12:0_16:1_18:2	41.0264	0.0118948	22.574	0.0604955	122.934	2.21402e-05	155.427	3.44732e-05	15.4634	0.0614169
	TG 46:5|TG 14:1_14:1_18:3	42.4054	0.00309881	37.298	0.0788492	126.58	1.72607e-05	207.495	0.000120115	26.2384	0.0531321
	TG 46:6|TG 8:0_16:0_22:6	42.9992	0.00380371	21.349	0.0685711	97.7324	9.12371e-06	142.135	0.000100872	12.4213	0.0748994
	TG 47:2|TG 13:0_16:0_18:2	3.75401	0.0124352	2.22296	0.123083	3.20359	0.00496625	3.54894	0.00387195	3.38412	0.0154349
	TG 47:4|TG 11:0_18:2_18:2	73.5396	0.00810572	40.3794	0.0721214	233.496	2.2205e-07	329.789	5.45957e-05	39.8124	0.0520615
	TG 48:3|TG 14:0_16:1_18:2	9.5671	0.00642693	6.23021	0.0137024	12.2976	2.89247e-05	12.2871	7.44734e-07	5.10764	0.034022
	TG 48:5|TG 12:0_18:2_18:3	28.5493	0.00715062	15.4799	0.0368382	90.3563	6.79057e-06	114.5	8.53439e-05	11.509	0.0547664
	TG 49:3|TG 15:0_16:1_18:2	2.3141	0.0299311	1.76896	0.168063	1.68794	0.132685	1.57381	0.192295	1.97631	0.066739
	TG 49:4|TG 13:0_18:2_18:2	10.985	0.00313159	7.77313	0.0311919	21.3492	1.25862e-06	24.5645	1.96937e-07	7.28066	0.0286169
	TG 50:4|TG 16:1_16:1_18:2	6.13978	0.000446295	5.04005	0.00205337	6.22874	2.27516e-05	5.82811	1.18355e-05	4.18864	0.0139089
	TG 50:7|TG 12:0_16:1_22:6	55.4076	0.00198825	73.2416	0.0481512	161.647	7.54745e-06	214.094	0.000112981	26.4115	0.0189335
	TG 51:4|TG 15:0_18:2_18:2	2.16174	0.00812854	2.18789	0.0250004	1.41321	0.213321	1.29825	0.375389	2.32358	0.00782308
	TG 51:5|TG 15:0_18:2_18:3	6.81535	0.00119146	6.00974	0.0119681	9.9615	2.15763e-06	9.2445	1.9976e-06	4.38385	0.0455254
	TG 52:5|TG 16:1_18:2_18:2	4.01275	4.23084e-05	4.1589	0.000234293	3.20285	0.000231466	2.75796	0.00079482	3.50979	0.00200736
	TG 52:6|TG 16:1_18:2_18:3	13.1948	0.00154279	11.2784	0.0140231	24.4454	8.11197e-07	22.4404	2.5046e-06	6.46953	0.0355047
	TG 52:7|TG 18:2_18:2_16:3	23.4185	0.00465434	16.7773	0.0297192	62.2468	5.67639e-07	66.1714	4.11522e-05	8.22119	0.0534022
	TG 53:5|TG 17:1_18:2_18:2	1.80393	0.0312155	1.84598	0.0243845	1.15306	0.500869	1.21046	0.390636	2.47537	0.000699102
	TG 53:6|TG 17:1_18:2_18:3	4.33092	0.000110665	4.65888	0.00459147	5.74443	2.36487e-05	5.34602	0.00039226	3.7585	0.0064821
	TG 53:7|TG 15:0_18:2_20:5	7.78866	0.00317602	6.97772	0.0182301	12.2788	9.41208e-07	12.1405	5.46962e-07	3.61737	0.0373338
	TG 54:10|TG 18:2_16:3_20:5	25.4696	0.000850024	14.4971	0.0279222	59.3408	8.35742e-06	64.5988	2.34815e-05	8.98189	0.0193422
	TG 54:6|TG 18:1_18:2_18:3	3.06321	0.000893356	3.10877	0.000483194	2.60585	0.000223772	2.6894	0.000222978	3.79386	3.08553e-05
	TG 55:3|TG 18:1_18:1_19:1	0.707861	0.032784	0.727423	0.10598	1.17512	0.279131	1.71046	0.000261408	1.25779	0.21579
	TG 55:4|TG 18:1_19:1_18:2	0.783273	0.160781	0.755873	0.204876	1.18776	0.231033	1.76066	0.000808189	1.14284	0.498219
	TG 55:8|TG 15:0_18:2_22:6	7.5305	0.000326068	7.87087	0.0213036	9.08501	9.06727e-06	9.53594	1.75668e-05	4.52701	0.0113082
	TG 56:10|TG 18:2_18:3_20:5	23.1023	0.0023432	19.3783	0.0228734	54.8826	2.93392e-06	56.8184	9.82949e-06	7.50651	0.0139808
	TG 56:8|TG 16:0_18:2_22:6	4.30599	3.06966e-05	4.72255	0.000453295	3.22681	6.67024e-05	3.16258	0.000255461	3.85479	0.000142561
	TG 56:9|TG 16:1_18:2_22:6	13.0158	0.000806345	13.4506	0.0172469	21.6664	3.70163e-07	21.7597	4.41536e-07	5.92282	0.00759068
	TG 57:4|TG 18:1_21:1_18:2	0.601174	0.0153877	0.631561	0.104197	0.951082	0.776848	1.49007	0.0115344	1.13763	0.479869
	TG 58:10|TG 18:2_18:2_22:6	8.00924	2.18881e-05	9.18517	0.0199964	10.1514	1.02853e-05	11.8434	9.36847e-09	6.39046	0.000228539
	TG 58:12|TG 18:2_18:4_22:6	18.2518	0.00256422	14.7649	0.0212765	33.5099	5.15552e-05	32.4	3.76945e-06	5.27061	0.00980572
	TG 58:9|TG 18:1_18:2_22:6	2.55409	0.00133026	2.46748	0.00474801	1.41042	0.0487637	1.49503	0.0256181	3.20834	0.00252083
	TG 59:11|TG 16:0_21:5_22:6	14.1788	6.64342e-05	15.2822	0.0164059	20.0366	3.1929e-05	22.6255	1.20845e-06	10.6209	0.000629017
	TG 60:12|TG 16:0_22:6_22:6	14.9221	0.000254702	19.4649	0.0188016	20.2844	3.17325e-05	22.1506	1.1218e-06	9.93186	0.000566489
	TG 60:13|TG 18:2_20:5_22:6	16.1875	0.000974134	17.9155	0.0222864	27.4463	0.000453406	29.7859	4.91841e-06	5.36735	0.00346924
	TG 60:14|TG 18:3_20:5_22:6	53.4576	0.000800117	41.0657	0.0465746	91.0875	0.000107306	94.0918	6.2004e-07	15.1007	0.00337851
	TG 61:3|TG 25:0_18:1_18:2	1.36004	0.0480343	1.32313	0.139675	0.211188	0.00171911	0.360086	0.00616436	2.36449	0.00135289
	TG 62:13|TG 18:1_22:6_22:6	5.35613	0.00176281	7.15586	0.0362499	4.31259	0.000884522	5.08943	0.000271728	4.72647	0.013588
	TG 62:14|TG 18:2_22:6_22:6	9.43952	0.000547122	13.1716	0.0390071	12.0624	0.00108592	16.1152	1.04054e-05	5.44844	0.0143823
	TG 64:16|TG 20:4_22:6_22:6	16.6525	0.000368928	22.2743	0.0155695	28.2618	0.000749439	33.4387	5.57929e-06	12.4685	0.0172704
↓	FA 20:2	0.753202	0.0121765	0.886709	0.340078	0.581015	0.00295672	0.798376	0.0580966	1.5531	0.00911992
	FA 22:3	0.703576	0.0261968	1.25764	0.209286	0.377655	0.000118445	0.426293	4.11926e-05	1.44507	0.032775
	FA 22:4	0.92519	0.433634	1.14482	0.382723	0.705004	0.0144303	0.846691	0.0670411	1.63383	0.00368763
	FA 24:6	0.580979	0.0135546	0.688513	0.0459712	0.253502	4.29711e-06	0.267718	1.83867e-05	1.28067	0.103297
	FA 9:0	1.06712	0.496402	1.0075	0.966874	0.730596	0.0136134	0.882669	0.344068	1.15949	0.124655
	BMP 44:12|BMP 22:6_22:6	1.52361	0.32468	1.83195	0.0711995	0.767128	0.391463	0.360662	0.0336086	0.703744	0.264913
	CAR 18:1	0.640204	0.0410728	0.730591	0.187153	0.642052	0.10522	0.573033	0.0236643	1.12547	0.491557
	CE 16:0	0.588731	0.171928	0.451589	0.145789	0.211084	0.0237781	0.183905	0.0199349	0.258348	0.0292974
	CE 18:1	0.305446	0.000129805	0.306199	0.00025859	0.111425	6.76634e-06	0.0807703	5.1495e-06	0.268976	8.381e-05
	CE 18:2	0.317674	0.0023756	0.300069	0.00528241	0.0925006	0.000299925	0.0602304	0.00024473	0.287522	0.00210234
	CE 18:3	0.405037	0.0116576	0.350709	0.0215215	0.0361782	0.000694096	0.00784317	0.000594889	0.431368	0.045365
	CE 20:3	0.0520619	0.000972707	0.154007	0.00789793	0.0403103	0.000888902	0.00265016	0.000714097	0.20556	0.0045681
	CE 20:4	0.223416	0.00516532	0.279992	0.0214486	0.016399	0.0013558	0.00900686	0.00130219	0.316399	0.0117667
	CE 20:5	0.456004	0.0198759	0.614588	0.112228	0.0496731	0.00107148	0.0243564	0.000906705	0.362305	0.0150007
	CE 22:6	0.438983	0.0410969	0.571538	0.117366	0.0596468	0.00169325	0.0619825	0.00172744	0.929411	0.784658
	Cer 40:2;2O|Cer 18:2;2O/22:0	1.16128	0.0572298	0.968582	0.751745	0.729939	0.00924849	0.64767	0.00225755	0.855642	0.193373
	Cer 45:1;3O|Cer 20:1;2O/25:0;O	1.13162	0.590317	0.726777	0.398929	0.572782	0.123153	0.41672	0.0444851	0.816255	0.482763
	CL 68:4|CL 16:1_18:1_16:1_18:1	1.29476	0.276313	0.0856925	0.000525552	0.711557	0.0346677	0.482354	0.000769312	0.648918	0.0158359
	CL 72:7|CL 18:1_18:2_18:2_18:2	1.00752	0.951491	0.249322	0.0149342	0.871812	0.364955	0.741605	0.0717243	0.889206	0.455083
	CL 74:11|CL 36:5_38:6	0.923531	0.286464	0.283055	0.0240807	0.936271	0.389648	0.902656	0.16478	0.959612	0.583479
	CL 74:9|CL 18:1_18:2_18:2_20:4	0.929169	0.611238	0.369243	0.022735	0.654212	0.0435661	0.546259	0.0138512	0.807567	0.231622
	CL 78:14|CL 16:1_18:1_22:6_22:6	0.381978	0.269457	0.369082	0.230463	0.368502	0.255004	0.0438759	0.043052	0.0412529	0.0426933
	CL 80:14|CL 18:1_18:1_22:6_22:6	0.825143	0.334337	1.75983	0.473389	2.74595	0.211437	0.26639	0.00625839	0.728936	0.0916972
	CL 80:15|CL 18:1_20:4_20:4_22:6	1.08621	0.453926	1.0674	0.587241	0.924095	0.531563	0.736917	0.0361023	0.748149	0.380482
	CL 82:17|CL 18:1_20:4_22:6_22:6	0.521527	0.465484	9.91918	0.0196175	0.392824	0.345307	0.327687	0.306872	2.54849	0.324611
	DG 38:1|DG 18:0_20:1	0.669641	0.00484829	0.790097	0.180588	0.676926	0.117912	1.07946	0.713953	2.22049	0.00154145
	DG 38:2|DG 18:1_20:1	0.651621	0.0157396	0.969165	0.856521	0.790266	0.265183	1.4323	0.227025	2.24694	0.00447257
	DG 40:2|DG 18:1_22:1	0.815781	0.135596	0.970706	0.870444	0.553588	0.0157254	0.74955	0.157043	1.31642	0.0363678
	DG 40:4|DG 18:0_22:4	0.763856	0.052136	1.09663	0.410233	0.626703	0.0214211	0.725477	0.0623043	1.8391	0.00201053
	DG 40:4|DG 20:0_20:4	0.765095	0.0572887	1.10296	0.395618	0.625287	0.0221712	0.721858	0.0611648	1.83785	0.00169402
	DG 42:2|DG 18:1_24:1	0.707879	0.154419	0.512178	0.0628783	0.681469	0.148643	0.453655	0.0196859	0.965733	0.9035
	DG 50:0	0.759694	0.139865	0.469516	0.0139953	0.122832	0.000293212	0.111768	0.000222538	0.496376	0.0116999
	DG 52:0	1.48612	0.173471	0.81753	0.458186	0.254683	0.00390796	0.307841	0.0062741	0.835216	0.446695
	DG 52:1	0.868694	0.500442	0.53982	0.0615884	0.243812	0.00366218	0.253791	0.00359483	0.579573	0.0546525
	DG 52:2	0.418126	0.00910416	0.265698	0.00923309	0.12791	0.00109418	0.122301	0.00106128	0.300808	0.00451786
	LPC 14:0	0.967055	0.688653	0.751563	0.0509069	0.709094	0.106721	0.608699	0.0151626	0.976591	0.768672
	LPC 16:0	1.06178	0.653946	1.02552	0.877326	0.795035	0.283773	0.66272	0.0410736	1.14396	0.418545
	LPC 17:0	0.90718	0.520181	0.750917	0.177292	0.652665	0.070734	0.495773	0.00824085	0.889862	0.557525
	LPC 18:0	1.06915	0.497394	0.974204	0.807253	0.719725	0.105472	0.640381	0.0104991	1.00324	0.979246
	LPC 20:0	0.786617	0.232506	0.820079	0.118186	0.613082	0.0132973	0.35317	0.00513691	0.667165	0.0283506
	LPC 20:1	0.65861	0.00745802	0.609308	0.00466214	0.614437	0.00212329	0.488502	0.000272243	0.634735	0.0444204
	LPC 21:0	1.00364	0.986934	0.818607	0.358137	0.648791	0.0459872	0.577062	0.0164864	0.801329	0.231228
	LPC 22:0	0.947304	0.582191	0.863911	0.264667	0.692025	0.00526591	0.587685	0.00131242	0.891976	0.272932
	LPC 22:1	1.26654	0.256521	0.946672	0.800092	0.798034	0.295142	0.596917	0.0439249	1.00457	0.981829
	LPC 23:0	1.07121	0.800636	0.502055	0.149933	0.668165	0.183373	0.472926	0.045322	0.752611	0.32927
	LPC 24:0	1.14659	0.504657	0.566395	0.212755	0.74513	0.234854	0.531079	0.0417069	0.816654	0.428155
	LPC 24:1	0.840928	0.0518372	0.747711	0.00600082	0.630672	0.000464615	0.472538	2.38382e-05	0.663639	0.00175458
	LPC 27:0	0.86007	0.154167	0.488553	0.00640057	0.729652	0.00622724	0.633402	0.00107916	0.81951	0.0670779
	LPE 20:0	1.06413	0.53772	1.02912	0.800632	0.739192	0.114126	0.649635	0.0133504	1.05866	0.617425
	LPE 20:2	0.893581	0.289333	0.841906	0.187959	0.769776	0.0303385	0.737439	0.0350869	1.13041	0.396535
	LPE 22:3	0.972934	0.79277	0.924677	0.287462	0.819973	0.0212457	0.984514	0.843909	1.06441	0.141678
	LPE 22:4	0.830351	0.288232	0.840158	0.355585	0.854785	0.325411	0.65138	0.0369764	0.697204	0.0646504
	LPE O-18:2	0.967909	0.858301	0.732482	0.31434	0.747622	0.23055	0.484939	0.0238995	0.764475	0.239654
	LPE O-26:7	0.756224	0.0121995	0.888979	0.296542	0.799231	0.0235638	0.78753	0.0305532	0.888122	0.181554
	LPG 22:6	1.38083	0.285199	0.937879	0.770405	0.631226	0.0131038	0.462773	0.00152519	0.99925	0.99688
	PC 30:0|PC 14:0_16:0	0.79111	0.16089	0.629616	0.054392	0.529337	0.00738872	0.526632	0.0068003	0.422361	0.00223813
	PC 31:0	0.79176	0.145261	0.645223	0.04691	0.494553	0.00694858	0.50597	0.00529083	0.619599	0.0149359
	PC 31:1|PC 15:0_16:1	0.670416	0.304123	0.439079	0.125252	0.494698	0.100129	0.338394	0.0436769	0.427895	0.0721589
	PC 32:1|PC 16:0_16:1	0.685803	0.0566782	0.607288	0.0334438	0.619461	0.0427962	0.504771	0.005577	0.449219	0.0023065
	PC 32:2|PC 16:1_16:1	1.05302	0.653532	0.64987	0.0447749	0.935726	0.596205	0.986744	0.905159	0.667599	0.0176342
	PC 33:0|PC 16:0_17:0	0.789779	0.200378	0.73106	0.152051	0.717253	0.0839052	0.654523	0.0479298	0.700077	0.0671179
	PC 33:1	0.588927	0.00911399	0.563931	0.0201063	0.627411	0.0211872	0.525124	0.00532317	0.713471	0.0474809
	PC 34:0|PC 16:0_18:0	1.20114	0.0953958	0.970321	0.82117	0.845313	0.134283	0.758395	0.0342526	0.946051	0.551958
	PC 35:0	1.15132	0.222002	1.00898	0.938629	0.73872	0.0101951	0.656032	0.0024268	0.865932	0.128136
	PC 35:1	0.680502	0.00820492	0.63247	0.0119303	0.772826	0.0607129	0.75383	0.0319513	1.00162	0.986542
	PC 35:2	0.768463	0.00576628	0.658384	0.018726	0.769513	0.0139493	0.870161	0.159707	0.830316	0.0744429
	PC 36:0|PC 18:0_18:0	1.30899	0.0220704	1.12302	0.287105	0.743199	0.0316439	0.630574	0.00400232	1.19245	0.0443163
	PC 36:1	0.972329	0.718445	0.975998	0.801875	0.866844	0.109889	0.799101	0.0286746	0.987088	0.863084
	PC 36:3|PC 18:1_18:2	0.655026	0.0465878	0.557109	0.041185	0.559921	0.0232366	0.633159	0.0375744	0.722987	0.0933067
	PC 36:4|PC 16:0_20:4	0.807444	0.0886933	0.837722	0.222337	0.745539	0.0440555	0.781772	0.0612936	0.745565	0.0350006
	PC 36:5	0.921158	0.478947	0.845579	0.291174	0.65474	0.00554141	0.511229	0.000929301	0.705458	0.025324
	PC 36:6|PC 14:0_22:6	0.95372	0.862234	0.602452	0.201907	0.557847	0.0695437	0.492317	0.0398514	0.556203	0.0639227
	PC 37:4|PC 17:0_20:4	1.08619	0.41376	1.01344	0.919579	0.831366	0.0168849	0.792534	0.00109934	0.734028	0.000433111
	PC 38:1	0.798332	0.194125	0.879012	0.477203	0.658974	0.0488902	0.485913	0.00909748	0.724305	0.0911693
	PC 38:2|PC 18:1_20:1	0.695059	0.041073	0.707461	0.0346727	0.409045	0.000523238	0.310717	0.000189598	0.795471	0.0646244
	PC 38:3|PC 18:0_20:3	0.735882	0.00727739	0.770527	0.0233605	0.497104	7.05262e-05	0.396641	1.25143e-05	0.859873	0.0310645
	PC 38:5	0.756773	0.0239076	0.831882	0.171645	0.693152	0.00972301	0.668569	0.00520464	0.839666	0.0829173
	PC 38:6|PC 16:0_22:6	0.886711	0.0541335	0.978067	0.76818	0.838249	0.0150384	0.82155	0.00972179	0.979085	0.660027
	PC 38:7	0.864986	0.368306	0.877844	0.435199	0.639245	0.0133465	0.505963	0.00220826	0.768874	0.0693238
	PC 39:2	0.931645	0.700703	0.728053	0.0577096	0.644593	0.00818937	0.495208	0.00104602	0.734202	0.0270059
	PC 39:6	0.678024	0.0248309	0.693897	0.0787446	0.604701	0.00900417	0.692159	0.0370445	0.997983	0.987366
	PC 39:7	0.587349	0.028968	0.605244	0.0678126	0.53063	0.0212959	0.476253	0.0127122	0.852082	0.371116
	PC 40:2|PC 20:1_20:1	0.722011	0.219963	0.689602	0.254102	0.604041	0.0970103	0.501238	0.0466864	0.669214	0.152215
	PC 40:4|PC 18:0_22:4	0.928624	0.481244	1.03789	0.676039	0.879977	0.197034	0.685901	0.00618507	0.836846	0.104028
	PC 40:7	0.557926	0.0105802	0.667612	0.0755766	0.577041	0.0120862	0.580893	0.0119589	0.607753	0.0182132
	PC 40:8|PC 18:2_22:6	0.694782	0.0145392	0.850643	0.204772	0.589022	0.00328025	0.531434	0.00105733	0.892967	0.223933
	PC 40:9	0.511193	0.00490951	0.664956	0.0551851	0.465699	0.00223941	0.369545	0.000820525	0.691854	0.0336358
	PC 41:2	0.9436	0.628096	0.84589	0.288896	0.702989	0.00807988	0.618487	0.00110487	0.754125	0.0143234
	PC 41:3	1.0183	0.914433	0.760798	0.25235	0.731495	0.102819	0.645929	0.0483726	0.631207	0.0378783
	PC 42:10|PC 20:4_22:6	0.456955	0.0134334	0.666299	0.103927	0.270453	0.00216482	0.236181	0.00142873	0.781685	0.183865
	PC 42:5	1.07867	0.367208	1.18431	0.136374	0.877529	0.179557	0.686426	0.00906706	0.86832	0.204231
	PC 42:8	0.507639	0.0124611	0.518918	0.0250066	0.44986	0.00518366	0.424953	0.00387585	0.615534	0.0212849
	PC 42:9	0.458788	0.00282619	0.563716	0.0194801	0.298398	0.000517838	0.24581	0.000305225	0.791071	0.116539
	PC 43:9	1.23591	0.189618	0.504343	0.00698122	1.01766	0.873638	0.711909	0.0564787	0.560246	0.00856954
	PC 44:12|PC 22:6_22:6	0.413724	0.0190481	0.414032	0.0652275	0.221501	0.00472952	0.180793	0.003377	0.904423	0.6463
	PC 46:5	0.97901	0.861125	0.990276	0.952191	0.906875	0.454793	0.707545	0.035953	1.10883	0.36383
	PC O-30:0	1.19264	0.263329	1.0365	0.847186	0.762653	0.122925	0.643024	0.0239171	0.363223	0.00281111
	PC O-33:0	1.05925	0.684122	1.14192	0.215223	1.07251	0.457315	0.741463	0.0182795	0.703875	0.0328205
	PC O-34:1	1.00916	0.937879	0.958231	0.743078	0.831562	0.151102	0.642838	0.0110305	0.704462	0.0220137
	PC O-36:3	0.977387	0.863843	0.844092	0.179831	0.79241	0.0300642	0.749219	0.00968659	0.776152	0.0222847
	PC O-39:9	0.62869	0.139839	0.621473	0.146736	0.42572	0.0354813	0.432022	0.0313081	0.653482	0.132187
	PE 23:4	0.854086	0.336849	0.758549	0.237103	0.856127	0.375786	0.567658	0.010275	0.764863	0.0723537
	PE 32:1|PE 16:0_16:1	0.947591	0.915304	0.253956	0.06462	0.36492	0.0694473	0.17923	0.0218959	0.116666	0.016167
	PE 34:1|PE 16:0_18:1	0.993371	0.981757	0.575429	0.0723501	0.718236	0.126892	0.514937	0.0208117	0.471381	0.0155198
	PE 36:4|PE 16:0_20:4	0.741552	0.0468873	0.645056	0.0238844	0.717419	0.0560016	0.775571	0.0599928	0.610709	0.00698764
	PE 36:4|PE 18:2_18:2	0.678695	0.033861	0.606949	0.0307876	0.660078	0.0454841	0.686856	0.0282689	0.641005	0.0197323
	PE 36:5|PE 16:1_20:4	1.22551	0.461416	1.00565	0.973014	0.779632	0.150687	0.636053	0.036318	0.38711	0.00466005
	PE 38:1|PE 18:0_20:1	0.858772	0.451263	0.719311	0.251741	0.625224	0.0706438	0.381243	0.0103473	1.0362	0.842551
	PE 38:2|PE 18:1_20:1	0.858331	0.440809	0.678497	0.192842	0.512198	0.0227288	0.39104	0.00736595	0.840547	0.362958
	PE 38:7|PE 16:1_22:6	1.30341	0.187511	1.55217	0.0103516	1.03012	0.767699	0.770226	0.0111995	0.551767	0.00164341
	PE 38:8	0.843479	0.460285	0.446325	0.0586687	0.720074	0.160498	0.513461	0.026116	0.447185	0.0165824
	PE 40:10|PE 20:5_20:5	1.06635	0.707016	0.239163	0.0056993	0.854033	0.363523	0.682731	0.062753	0.482963	0.0216068
	PE 40:3|PE 18:0_22:3	1.06463	0.414016	1.00517	0.967525	0.929042	0.396505	0.800013	0.0320203	0.982178	0.857779
	PE 40:8	0.911904	0.631908	0.116058	0.00426927	0.810815	0.269523	0.652334	0.0590004	0.48075	0.0270904
	PE 40:9|PE 18:3_22:6	0.754463	0.181139	0.457669	0.0639551	0.575672	0.0275383	0.417941	0.00714981	0.477552	0.0140773
	PE 41:1|PE 23:0_18:1	0.968762	0.534844	0.817669	0.170429	0.842689	0.107924	0.672109	0.000318149	0.822323	0.0234548
	PE 42:4|PE 18:0_24:4	1.03364	0.816822	0.944823	0.691272	0.859899	0.300829	0.696534	0.0455178	1.0113	0.940652
	PE 42:5|PE 18:0_24:5	1.0618	0.434829	1.08165	0.426351	0.881404	0.13668	0.800961	0.0195537	0.88915	0.178165
	PE 42:7|PE 20:1_22:6	0.799668	0.0986977	0.721583	0.0787686	0.698375	0.0422927	0.571829	0.00523891	0.671176	0.0250852
	PE 42:9;2O|PE 22:6_20:3;2O	0.827719	0.049169	1.06821	0.508845	0.882255	0.146077	0.916008	0.271709	0.97059	0.701019
	PE 44:10|PE 22:4_22:6	0.914601	0.568526	0.813549	0.221407	0.607092	0.0152361	0.45342	0.00277537	0.557001	0.0142911
	PE 44:12|PE 22:6_22:6	0.954437	0.814457	0.0509977	0.000101928	1.04043	0.605248	0.957326	0.605627	0.631261	0.0464085
	PE 46:12	1.14444	0.548488	0.302803	0.0446601	1.08037	0.727287	0.851835	0.524834	1.32342	0.271719
	PE O-36:4|PE O-16:0_20:4	1.05379	0.66574	1.02779	0.83911	0.810385	0.0986201	0.737382	0.0128055	0.766059	0.0146888
	PE O-36:6|PE O-16:1_20:5	1.1257	0.489749	0.932184	0.580353	0.689017	0.0123897	0.558816	0.00159841	0.662978	0.0119755
	PE O-37:6|PE O-17:2_20:4	0.874967	0.314472	0.738068	0.0684927	0.748295	0.040712	0.633567	0.00950657	0.725725	0.03394
	PE P-40:8|PE P-18:2_22:6	0.803571	0.48438	0.337561	0.011041	0.564566	0.0575523	0.990091	0.952151	0.299313	0.00207199
	PEtOH 40:2|PEtOH 20:1_20:1	1.00702	0.941077	0.89914	0.626095	0.709274	0.00776581	0.65443	0.00208073	0.449395	0.000842164
	PG 34:1|PG 16:0_18:1	0.738926	0.0714709	0.885534	0.491522	0.680003	0.0201145	0.616001	0.00985961	0.978622	0.865848
	PG 34:2|PG 16:0_18:2	1.298	0.394185	0.325752	0.0254971	0.696278	0.199453	0.510022	0.018826	1.40076	0.129683
	PG 36:4|PG 16:0_20:4	1.33653	0.223764	0.358765	0.00112988	0.753581	0.0638443	0.470489	0.0018554	1.1513	0.176036
	PI 32:0	0.543887	0.0621848	0.474704	0.119337	0.317152	0.0120907	0.210156	0.00614796	0.599759	0.0912392
	PI 36:1	0.887899	0.314993	0.523027	0.00390888	0.780897	0.00975281	0.569084	0.000571212	0.806956	0.0143042
	PI 36:2	0.810129	0.0504499	0.4443	0.0197733	0.602983	0.00157357	0.526664	0.000608042	1.04941	0.63658
	PI 36:4|PI 16:0_20:4	0.724202	0.183712	0.294261	0.0364922	0.613086	0.0425047	0.454724	0.0110581	0.789059	0.262383
	PI 36:5	0.78653	0.48691	0.281311	0.0600513	0.502985	0.0555108	0.342709	0.0167418	0.591209	0.104649
	PI 38:3	0.878427	0.10992	0.321785	0.0115828	0.805744	0.0494213	0.768677	0.00480218	1.1008	0.278443
	PI 38:4	0.959062	0.53131	0.360268	0.0210064	0.93937	0.574534	0.913001	0.214627	0.973493	0.746741
	PI 38:5|PI 18:1_20:4	0.755033	0.173103	0.274102	0.0220797	0.600673	0.0281549	0.452538	0.00733463	0.616907	0.0398499
	PI 38:6|PI 16:0_22:6	0.774635	0.0894206	0.3258	0.014513	0.599586	0.00726194	0.456621	0.000709202	1.22027	0.144753
	PI 39:6|PI 17:0_22:6	0.922007	0.619023	0.324578	0.0352613	0.692203	0.0487163	0.589373	0.0120812	1.37862	0.0632997
	PI 40:4	0.754922	0.294055	0.164162	0.0157984	0.722965	0.292893	0.254907	0.00611278	1.74044	0.0252726
	PI 40:8|PI 20:4_20:4	0.717335	0.111779	0.352645	0.0364865	0.583641	0.0322926	0.542695	0.0236054	0.752514	0.17649
	PI 42:10|PI 20:4_22:6	0.888986	0.359234	0.521346	0.0483834	0.846758	0.240256	0.911504	0.517174	0.626983	0.0177792
	PS 36:2|PS 18:1_18:1	0.96536	0.800824	0.631095	0.0144056	1.0202	0.803164	1.03489	0.656616	0.610182	0.00289222
	PS 38:4|PS 18:0_20:4	0.957336	0.887096	0.0374734	0.00820721	0.859837	0.499705	0.796212	0.339028	0.38923	0.0265789
	PS 40:6|PS 18:0_22:6	1.00899	0.966084	0.0290956	9.91594e-05	1.12335	0.141045	1.03069	0.705505	0.617594	0.0594322
	PS 42:8	0.713744	0.0414295	0.333037	0.0207372	0.621674	0.00298931	0.544167	0.00150972	0.792458	0.129979
	PS 44:10|PS 22:4_22:6	0.770329	0.146831	0.352524	0.0178753	0.701207	0.0275004	0.510099	0.00117611	1.05307	0.667342
	PS 46:11|PS 24:5_22:6	0.587019	0.0458084	0.134397	0.0064021	0.381855	0.00918373	0.259282	0.00264306	0.877073	0.564812
	PS 46:12|PS 22:6_24:6	0.718934	0.113561	0.370236	0.0251106	0.570789	0.0165457	0.471258	0.0060025	0.616174	0.0368371
	SM 34:0;3O	0.849705	0.0675014	0.667624	0.00605756	0.707025	0.00390496	0.612504	0.00149628	0.664592	0.00292379
	SM 40:0;3O	1.06183	0.588831	0.819425	0.198445	0.882888	0.299734	0.707155	0.0207422	0.843778	0.143404
	SM 40:2;2O|SM 18:1;2O/22:1	1.03345	0.74976	0.987897	0.929312	0.884166	0.246875	0.720698	0.0251387	0.704288	0.0197366
	SM 43:2;2O|SM 18:2;2O/25:0	1.0102	0.93092	0.912057	0.661791	0.766607	0.131896	0.626999	0.020641	0.689334	0.0346869
	ST 27:2;O	1.08956	0.62848	0.817334	0.317111	0.767568	0.063898	0.545086	0.00760182	0.929448	0.602613
	TG 50:1|TG 16:0_16:0_18:1	0.527841	0.0354339	0.585007	0.100504	0.834673	0.401417	0.790918	0.290806	0.613286	0.0744784
	TG 50:2|TG 16:0_16:1_18:1	0.574851	0.0493898	0.569639	0.116119	0.70319	0.139907	0.67587	0.110277	0.590923	0.0605533
	TG 51:2|TG 16:0_17:1_18:1	0.430622	0.031714	0.500634	0.0891221	0.630518	0.107677	0.639631	0.119788	0.416386	0.0245229
	TG 52:2|TG 16:0_18:1_18:1	0.365439	4.1743e-06	0.485565	0.000665366	0.648721	0.000589697	0.562163	4.12515e-05	0.476598	0.000168205
	TG 52:3|TG 16:0_18:1_18:2	0.354228	5.50453e-05	0.416573	0.000796205	0.516516	0.000149583	0.463257	0.00141329	0.41993	6.5778e-05
	TG 52:4|TG 16:0_18:2_18:2	0.72041	0.224467	0.970946	0.925745	0.507968	0.0392073	0.505911	0.0374918	1.08302	0.713637
	TG 53:2|TG 16:0_18:1_19:1	0.486473	0.00183549	0.680436	0.0562571	0.773839	0.0974045	0.924024	0.475269	0.998487	0.994149
	TG 53:3|TG 17:0_18:1_18:2	0.621258	0.0255238	0.714776	0.0928638	0.822706	0.185231	1.00146	0.990568	0.804051	0.144546
	TG 54:3|TG 18:0_18:1_18:2	0.422425	0.00552035	0.489997	0.0351369	0.867512	0.422633	0.960099	0.776153	0.640174	0.0532348
	TG 54:5|TG 18:1_18:2_18:2	0.615918	0.056299	0.72016	0.23468	0.626061	0.0495089	0.68514	0.0933928	1.11693	0.623225
	TG 56:1|TG 16:0_22:0_18:1	0.93174	0.776504	0.871884	0.588449	0.414425	0.0241819	0.497364	0.0299363	1.47954	0.0999524
	TG 56:2|TG 18:0_18:1_20:1	0.826616	0.277419	0.908916	0.564542	0.516991	0.0109988	0.691604	0.0332164	1.68045	0.0330791
	TG 56:3|TG 18:1_18:1_20:1	0.605068	0.0106959	0.685896	0.0495659	0.498769	0.00352769	0.656832	0.00897178	1.03106	0.846322
	TG 56:4|TG 18:1_20:1_18:2	0.432426	0.00512954	0.507524	0.0442032	0.712233	0.0960993	0.850894	0.341236	0.776204	0.155825
	TG 56:5|TG 18:1_18:2_20:2	0.471596	0.00127812	0.512671	0.00719817	0.619367	0.0107836	0.68646	0.0179823	0.755149	0.0696432
	TG 56:6|TG 16:0_18:1_22:5	0.727252	0.0798781	0.802886	0.234271	0.660839	0.0448388	0.697229	0.0589696	1.19165	0.34654
	TG 57:1|TG 16:0_23:0_18:1	1.06496	0.877168	0.769836	0.57746	0.115495	0.0314779	0.323852	0.0872154	1.34071	0.31905
	TG 58:1|TG 16:0_24:0_18:1	0.952329	0.830587	0.936796	0.795041	0.165459	0.00531029	0.157564	0.00459927	1.18264	0.438845
	TG 58:2|TG 16:0_18:1_24:1	1.00734	0.968134	0.907386	0.599267	0.4896	0.0174818	0.549145	0.02252	1.31172	0.167591
	TG 58:2|TG 22:0_18:1_18:1	0.8488	0.339929	0.79298	0.182142	0.405259	0.00501792	0.485405	0.00532427	1.14214	0.433622
	TG 58:3|TG 18:1_18:1_22:1	0.634351	0.00398417	0.603036	0.00534216	0.345647	0.000203805	0.435624	0.000439443	0.919079	0.626049
	TG 58:3|TG 22:0_18:1_18:2	0.771254	0.0711421	0.729533	0.071471	0.446868	0.00300407	0.589016	0.00913835	1.20644	0.387252
	TG 58:5|TG 18:0_18:1_22:4	0.380186	0.00689261	0.436726	0.032985	0.416511	0.0144158	0.506654	0.017997	0.801091	0.278364
	TG 58:6|TG 18:1_18:1_22:4	0.500499	0.00636509	0.499603	0.026963	0.476858	0.00847468	0.632842	0.0255953	0.881993	0.480052
	TG 59:1|TG 16:0_25:0_18:1	0.789612	0.615381	0.391229	0.216981	0.0735934	0.0394975	0.0760369	0.0402832	0.829473	0.668458
	TG 59:2|TG 23:0_18:1_18:1	1.07712	0.807953	0.94015	0.859649	0.139555	0.0188641	0.204677	0.0271532	1.17337	0.560945
	TG 60:1|TG 18:0_24:0_18:1	0.863003	0.589511	0.998559	0.996084	0.0673663	0.00293061	0.0475088	0.00264073	1.22532	0.399761
	TG 60:2|TG 24:0_18:1_18:1	0.918137	0.598913	0.895691	0.563934	0.203076	0.00132196	0.188105	0.00117276	0.990915	0.955634
	TG 60:3|TG 24:0_18:1_18:2	0.980102	0.900722	0.880529	0.522703	0.394346	0.0066954	0.472652	0.0116809	1.1147	0.520076
	TG 60:4|TG 18:1_24:1_18:2	0.816986	0.356791	0.692739	0.236156	0.42197	0.0240278	0.596107	0.0772194	1.01824	0.940861
	TG 60:4|TG 24:0_18:2_18:2	0.743631	0.0854021	0.624251	0.0674922	0.374985	0.00417364	0.459777	0.00533943	0.86271	0.477137
	TG 60:6|TG 18:1_18:1_24:4	0.444101	0.00991278	0.42077	0.0258481	0.323522	0.00501891	0.39257	0.00620018	0.828638	0.35275
	TG 62:2|TG 26:0_18:1_18:1	0.990457	0.966502	1.07181	0.768011	0.143499	0.00315981	0.152395	0.00391633	1.76133	0.00558796
	TG 62:3|TG 18:1_18:1_26:1	1.62197	0.143383	1.36919	0.329464	0.158764	0.028137	0.170632	0.0298251	1.89842	0.0363254
	TG 62:3|TG 26:0_18:1_18:2	1.14322	0.424333	0.968357	0.864135	0.167096	0.000971186	0.220249	0.00111291	1.58447	0.0129632
	TG 62:4|TG 18:1_26:1_18:2	0.84168	0.56444	0.957639	0.897609	0.198568	0.0229894	0.219516	0.023746	0.938642	0.833988
	TG 62:5|TG 26:1_18:2_18:2	0.690044	0.0875724	0.67923	0.171977	0.16887	0.00157041	0.153257	0.00138437	0.622914	0.0637985
	TG 66:2|TG 16:0_18:1_32:1	0.767138	0.450727	1.16561	0.649332	0.0341908	0.0145923	0.0292949	0.0142464	1.39559	0.293266
	TG 66:3|TG 16:0_32:1_18:2	1.06703	0.835395	1.09717	0.800866	0.059491	0.0210442	0.0636633	0.0215156	1.93997	0.0376054
	TG 67:3|TG 16:0_33:1_18:2	1.11862	0.738886	1.44079	0.353821	0.0419537	0.0246195	0.0731419	0.0280052	1.8519	0.0646138
	TG 68:3|TG 18:1_18:1_32:1	1.12183	0.733365	1.3501	0.387129	0.0339758	0.0190076	0.0505996	0.0204582	1.97587	0.032548
	TG 68:4|TG 18:1_32:1_18:2	1.20724	0.472571	1.19454	0.580859	0.103827	0.00978631	0.131084	0.0114469	1.84535	0.0340398
	TG 69:4|TG 18:1_33:1_18:2	1.7014	0.114909	1.84922	0.112666	0.0875556	0.0226469	0.11393	0.0258375	2.66896	0.00541313
	TG 70:3|TG 18:1_18:1_34:1	0.947596	0.874307	1.3477	0.340353	0.0221866	0.0124885	0.024801	0.0126424	1.4533	0.221095
	TG 70:5|TG 34:1_18:2_18:2	2.39827	0.0243847	2.49237	0.120495	0.235172	0.0216008	0.444495	0.0933647	4.10052	0.00369372
