# Supplementary material for: A metabolome atlas of mouse brain on the global metabolic signature dynamics following short-term fasting
Source: Signal Transduct Target Ther. 2023 Sep 8;8:334. doi: 10.1038/s41392-023-01552-y (PMC10484938; doi:10.1038/s41392-023-01552-y)
Supplement: Supplementary file 6 — Dataset 5 [file 41392_2023_1552_MOESM6_ESM.xlsx]

## Sheet: SC
	Supplementary Table 17. Statistics of DEMs in each period of fasting in SC.
FC: fold change, the ratio of metabolite level in each period pf fasting to that of Ctrl.
Category	Metabolite	F-3h vs. Ctrl		F-6h vs. Ctrl		F-12h vs. Ctrl		F-24h vs. Ctrl
		FC(F-3h/Ctrl)	p value	FC(F-6h/Ctrl)	p value	FC(F-12h/Ctrl)	p value	FC(F-24h/Ctrl)	p value
Fatty acyls and glycerolipids	octanoic acid	0.588715	0.0093585	0.579792	0.00127709	0.912639	0.30237	0.797957	0.0476017
	nonanoic acid	1.06462	0.651751	0.953344	0.641384	0.82165	0.149237	0.802757	0.0442561
	palmitic acid	1.0039	0.972564	0.829191	0.0134747	0.854674	0.0494076	0.797765	0.00916853
	9-hexadecenoic acid	0.87076	0.744253	0.606571	0.188639	0.375551	0.0477662	0.598233	0.12542
	stearic acid	0.959385	0.685951	0.805925	0.0205098	0.854154	0.113244	0.769342	0.00490054
	oleic acid	0.75105	0.0102239	0.694656	0.00617856	1.0219	0.783159	0.835979	0.0375595
	MG(0:0/16:0/0:0)	0.947199	0.752354	1.31639	0.0396461	1.10475	0.444181	1.06454	0.572109
	MG(18:0/0:0/0:0)	0.982389	0.819345	1.22676	0.0602846	1.24116	0.0114862	0.978707	0.779231
	MG(18:1(9Z)/0:0/0:0)	0.958153	0.839511	1.52024	0.0395309	1.17651	0.350783	1.38912	0.0748833
	glycerol	0.977348	0.741012	1.17389	0.0401516	1.0671	0.314517	1.03835	0.49238
	glycerol-3-Phosphate	0.960543	0.831561	0.734588	0.23994	0.912977	0.477444	0.660875	0.0325045
Carbohydrates and carbohydrate conjugates	D-lyxose	1.04598	0.853338	1.71613	0.0257843	1.23449	0.267665	1.5131	0.0779096
	mannose	0.801231	0.291489	0.818557	0.269847	0.641579	0.067553	0.683853	0.0403361
	threonic acid	0.797441	0.233567	1.20392	0.210926	0.774245	0.147955	0.622086	0.0148118
	2-keto-gluconic acid	0.624856	0.0720645	0.819174	0.240296	0.664354	0.0566267	0.701787	0.0405555
	sorbitol	0.79814	0.339357	0.831898	0.317783	0.487009	0.0171685	0.516924	0.00931462
	threitol	0.79357	0.0975778	0.872485	0.154537	0.685911	0.0124476	0.658465	0.00192355
Glycolysis and TCA cycle	pyruvic acid	0.945839	0.757799	0.695598	0.0231899	0.707404	0.0224043	0.809245	0.0845011
	fructose-6-phosphate	1.12764	0.702202	2.42749	0.0376218	1.55422	0.0741014	1.78733	0.042958
	glucose-6-phosphate	1.22818	0.632132	3.20424	0.0265068	1.84367	0.0584621	2.1869	0.0174273
	lactic acid	1.00146	0.978711	0.983895	0.7144	0.868043	0.0183128	0.886867	0.010992
	citric acid	0.947163	0.685224	1.03825	0.766497	1.05357	0.593582	1.27282	0.0200446
	fumaric acid	1.12276	0.401826	1.36364	0.0220918	1.29005	0.0351849	1.28521	0.055839
Amino acid metabolism	glutamic acid	1.27101	0.00443553	1.14636	0.116488	1.1436	0.030369	1.11554	0.0652278
	glutathione	0.943692	0.808327	0.837043	0.433235	0.629011	0.059998	0.59656	0.021772
	ornithine	1.74749	0.0345821	2.0684	0.0296103	1.4337	0.00225382	1.43637	0.0384989
	aspartic acid	1.1454	0.127136	1.19497	0.040282	1.17008	0.0276404	1.15978	0.0341939
	citrulline	1.06387	0.606746	1.66481	0.0109076	1.49664	0.0333176	1.62537	0.00103822
	N-acetyl-L-aspartic acid	0.990942	0.777746	0.942532	0.0226692	0.93097	0.0059679	0.973683	0.337499
	isoleucine	1.29783	0.160109	1.4436	0.0160896	1.4658	0.0288535	1.29918	0.0433815
	leucine	1.34533	0.08559	1.38476	0.0238127	1.30714	0.0753187	1.08363	0.496841
	valine	1.13141	0.476622	1.52036	0.0140214	1.35939	0.0870552	1.18561	0.176304
	N-acetyl-lysine	0.754179	0.076987	0.590946	0.0195399	1.00144	0.989928	0.867342	0.196928
	cysteine	1.16491	0.513026	1.66239	0.0782113	1.81662	0.0133281	2.28194	0.0083793
	methionine	0.659852	0.0981532	0.630306	0.0484766	0.572612	0.02157	0.714549	0.0615123
	5'-methylthioadenosine	0.842045	0.326965	1.27902	0.0517954	1.50554	0.0175668	1.43433	0.0124411
	glycine	0.97565	0.566027	1.02749	0.441443	1.10256	0.00931327	1.12294	0.00263795
	sarcosine	0.866424	0.603116	0.58197	0.00913674	0.653037	0.0275366	0.617183	0.00617885
	tyrosine	0.805981	0.0719955	0.854635	0.094125	0.678251	0.00275905	0.760895	0.0144278
	phenylalanine	1.21331	0.0493345	1.45003	0.00413837	1.13452	0.0650604	1.23952	0.00825883
	β-alanine	1.12074	0.153435	1.27852	0.123172	1.1346	0.170246	1.26932	0.018013
	pyrophosphate	0.627868	0.117637	0.44644	0.0134764	0.665976	0.0905739	0.578879	0.0213189
	mimosine	0.811042	0.252121	0.634962	0.00639879	0.86025	0.180949	0.735842	0.0232431
Purines and pyrimidines	guanosine	1.08734	0.776491	1.98867	0.0694801	1.70979	0.0319155	1.69792	0.055345
	adenosine	0.961142	0.927181	0.429927	0.0837755	2.05866	0.00996281	0.544698	0.107697
	xanthine	1.01429	0.971149	2.47493	0.0133798	1.82246	0.0684297	2.0699	0.0682933
	xanthosine	0.853145	0.708577	1.08041	0.787531	1.10394	0.478441	1.54637	0.0379221
	hypoxanthine	1.15304	0.608729	2.32179	0.00195795	1.52159	0.0700614	1.97875	0.0117009
	inosine	1.02395	0.926223	1.82676	0.011144	1.27447	0.253306	1.70606	0.0249096
	uracil	1.00973	0.955655	1.50304	0.0364239	1.18132	0.257917	1.55699	0.0125418
Others	hypotaurine	1.7199	0.0478839	1.46529	0.134412	0.721762	0.0413026	0.923395	0.632958
	α-Tocopherol	0.775594	0.0232406	0.769051	0.0159321	0.826312	0.122403	0.816388	0.0214251
	pantothenic acid	0.801776	0.161209	0.934892	0.55124	0.626063	0.00553381	0.955957	0.691562
	O-phosphoethanolamine	0.882042	0.11525	1.1017	0.368129	1.11031	0.170789	1.13377	0.0124606
	decanedioic acid	0.929114	0.642779	0.82327	0.0788521	0.779424	0.0471748	0.841784	0.0578479
	dihydroxyacetone phosphate	0.900751	0.747238	1.23466	0.430868	1.70801	0.0199299	1.43912	0.0436735
	methylphosphate	1.09443	0.697501	1.1615	0.272288	1.51461	0.0257162	1.18083	0.200564
	2-hydroxybutyric acid	0.630557	0.204784	1.04858	0.858078	1.44251	0.214969	1.98542	0.00936886

## Sheet: BST
	Supplementary Table 18. Statistics of DEMs in each period of fasting in BST.
FC: fold change, the ratio of metabolite level in each period pf fasting to that of Ctrl.
Category	Metabolite	F-3h vs. Ctrl		F-6h vs. Ctrl		F-12h vs. Ctrl		F-24h vs. Ctrl
		FC(F-3h/Ctrl)	p value	FC(F-6h/Ctrl)	p value	FC(F-12h/Ctrl)	p value	FC(F-24h/Ctrl)	p value
Fatty acyls and glycerolipids	methyl stearate	1.42729	0.0921426	1.35818	0.0880789	1.70902	0.00404399	0.9807	0.916357
	MG(16:0/0:0/0:0)	0.961971	0.56279	1.30703	0.0432057	1.08437	0.485747	0.981524	0.717504
	MG(0:0/16:0/0:0)	1.21825	0.342233	1.49155	0.0298535	0.892284	0.614265	0.912482	0.670655
Carbohydrates and carbohydrate conjugates	L-fucose	0.805859	0.431935	1.07773	0.778388	0.549574	0.0217033	1.10029	0.706429
	ribose	0.951513	0.655783	0.864357	0.189656	1.28595	0.0336425	0.870957	0.427171
	D-lyxose	1.19136	0.220418	1.40077	0.110994	0.966439	0.809424	1.65753	0.045383
	threonic acid	1.21357	0.04735	1.43779	0.00212562	0.952874	0.32964	1.09473	0.321765
	lactobionic acid	0.851203	0.185241	0.81595	0.0121726	1.08153	0.398664	0.890296	0.502603
	sorbitol	1.11306	0.300251	1.04161	0.764197	0.642498	0.0150422	0.686869	0.0421362
Glycolysis and TCA cycle	pyruvic acid	0.707045	0.0128084	0.912809	0.271072	0.830858	0.0678745	1.16266	0.189205
	3-Phosphoglyceric acid	0.639674	0.0175176	1.10675	0.417755	0.948167	0.772128	0.879515	0.452076
	fructose-6-phosphate	2.88137	0.0400407	3.54684	0.000429069	1.46151	0.400697	1.45399	0.256551
	glucose-6-phosphate	3.41861	0.0193043	4.71674	0.000291318	1.64407	0.370531	1.56001	0.433215
	2-hydroxyglutaric acid	0.671966	0.00641536	0.77551	0.0784734	0.864656	0.211792	1.05932	0.674616
	fumaric acid	1.41536	0.00737547	1.49598	0.000791192	1.54306	0.00102008	1.12371	0.338153
Amino acid metabolism	alanine	1.59452	0.0404616	1.26088	0.241777	1.08626	0.522238	1.29204	0.116885
	citrulline	1.81688	0.00924216	1.47383	0.21257	1.35394	0.0980216	1.15768	0.526965
	ornithine	1.6963	0.0608908	1.30945	0.0180039	1.20693	0.321641	1.55871	0.0453071
	glutamine	2.09288	0.0334042	0.857384	0.674377	1.78012	0.0798504	0.80997	0.579509
	homocysteine	0.334188	0.0300602	0.400132	0.0449152	12.5194	0.375166	0.78289	0.554573
	methionine	0.548902	0.062749	0.488657	0.0341505	0.366948	0.0283799	0.634806	0.224415
	5'-methylthioadenosine	1.36706	0.0430577	1.06069	0.737864	1.47388	0.022114	1.26009	0.289892
	N-acetyl-lysine	0.756243	0.00934385	0.666988	0.0140508	1.00478	0.963934	0.743137	0.0270247
	threonine	0.943058	0.708007	1.00692	0.946147	0.778586	0.0289153	1.30018	0.265753
	sarcosine	0.426858	0.0162805	0.82967	0.509597	0.386941	0.0227322	0.655325	0.33555
	serine	0.834193	0.338866	0.971047	0.810832	0.712319	0.0419585	1.02602	0.911636
	isoleucine	1.21888	0.165349	1.37507	0.0311644	1.20479	0.138083	1.65407	0.00795479
	valine	1.25175	0.0572653	1.33942	0.0732006	1.23148	0.0644892	1.32016	1.07626e-05
Purines and pyrimidines	uracil	0.895892	0.225979	1.19729	0.198734	0.898704	0.0836367	1.35005	0.0138605
	urea	0.942219	0.522729	0.91097	0.417004	1.5015	0.0130396	1.24883	0.047865
	uridine	0.844457	0.00318327	0.993704	0.867952	0.923203	0.0685456	1.22196	0.0210979
	adenine	0.811106	0.00747603	0.970722	0.479329	0.900604	0.0306843	0.95672	0.567392
	hypoxanthine	1.65817	0.0600726	1.67705	0.174879	1.33171	0.185836	1.92847	0.0291899
	inosine	1.33804	0.0640776	1.41187	0.00936998	1.04601	0.640188	1.5916	0.00400424
	adenosine	0.905004	0.813349	0.997508	0.993101	1.48	0.121472	0.141044	0.00259698
Others	hypotaurine	0.811742	0.0199923	0.853632	0.0802633	0.727623	0.00559484	1.07656	0.755561
	pantothenic acid	0.778256	0.00482404	0.85115	0.285457	0.571752	0.00053006	0.821561	0.105513
	α-Tocopherol	0.845222	0.176582	0.789949	0.0256767	0.825865	0.0453416	0.67609	0.00329374
	O-phosphocolamine	1.28165	0.0110961	1.09691	0.306118	1.15604	0.0909048	1.37614	0.0285526
	palmitoylethanolamide	0.770729	0.0907411	0.818076	0.119771	0.823011	0.0730988	0.686575	0.0178663
	2-hydroxybutyric acid	1.21588	0.362397	1.53506	0.0541744	2.5687	0.00506983	3.00556	0.0004264
	methylphosphate	1.32304	0.0477783	1.36146	0.0780667	1.66985	0.0034839	1.0556	0.817634
	dihydroxyacetone phosphate	1.97409	0.0326327	1.87953	0.0130394	1.6074	0.0830916	1.46928	0.236011
	3-hydroxypyridine	1.12218	0.369712	0.980277	0.807523	1.11792	0.028167	0.8624	0.134101

## Sheet: HYT
	Supplementary Table 19. Statistics of DEMs in each period of fasting in HYT.
FC: fold change, the ratio of metabolite level in each period pf fasting to that of Ctrl.
Category	Metabolite	F-3h vs. Ctrl		F-6h vs. Ctrl		F-12h vs. Ctrl		F-24h vs. Ctrl
		FC(F-3h/Ctrl)	p value	FC(F-6h/Ctrl)	p value	FC(F-12h/Ctrl)	p value	FC(F-24h/Ctrl)	p value
Fatty acyls and glycerolipids	9-hexadecenoic acid	0.500451	0.00278301	0.988965	0.967795	0.595823	0.00784103	0.667652	0.0581242
	heptadecanoic acid	0.936151	0.589078	1.07787	0.6408	0.914135	0.230191	0.882274	0.00626424
	methyl stearate	0.838827	0.0732717	1.40172	0.210985	1.43965	0.00683243	2.07293	0.000225756
	MG(16:0/0:0/0:0)	1.04874	0.64671	1.29007	0.0458869	1.05218	0.763427	1.05441	0.736538
Carbohydrates and carbohydrate conjugates	D-lyxose	1.35694	0.160475	1.73606	0.0120152	1.53289	0.0598884	1.33205	0.219082
	ribose	0.848262	0.134096	0.800175	0.0142451	1.11387	0.133263	1.0472	0.437077
	deoxyglucose	0.989382	0.781922	0.99332	0.81782	1.05078	0.183919	1.08122	0.029975
	N-acetylneuraminic acid	1.0308	0.638186	1.08402	0.213766	1.12954	0.00681705	1.02504	0.387399
	sorbitol	1.14249	0.332684	1.15382	0.265846	0.691754	0.0167443	0.737452	0.048241
	ribitol	1.04838	0.573662	0.909609	0.464011	1.10057	0.141985	1.17689	0.0207625
	threitol	1.1373	0.138251	1.1823	0.0455609	1.02695	0.61847	0.881451	0.141405
	Scyllo-inositol	0.946014	0.631235	1.01238	0.921831	1.23822	0.0467008	1.19608	0.129833
Glycolysis and TCA cycle	fructose-6-phosphate	1.76062	0.0692269	2.78414	0.000993718	1.20482	0.382426	1.25538	0.538865
	glucose-6-phosphate	2.13808	0.117151	3.32794	0.00283189	1.4685	0.211752	1.40637	0.578291
	pyruvic acid	0.987283	0.887369	0.806151	0.11501	2.2011	0.0290134	1.22696	0.0871381
	3-phosphoglyceric acid	1.15238	0.718061	1.11698	0.528054	2.67703	0.000814528	0.907799	0.563805
	2-hydroxyglutaric acid	1.23065	0.0700677	1.09775	0.724175	0.772307	0.00823658	1.15166	0.438837
	fumaric acid	1.18286	0.243375	1.11192	0.349044	1.81238	0.000130826	1.40708	0.00590487
Amino acid metabolism	γ-aminobutyric acid	1.11814	0.340825	1.27565	0.0220254	1.24034	0.0191752	1.27048	0.0989527
	homocysteine	0.412606	0.0276463	0.53854	0.10704	0.598655	0.103953	0.494849	0.105036
	5'-methylthioadenosine	0.741036	0.0426664	1.07727	0.619168	1.15203	0.290287	1.11927	0.35332
	methionine	0.612945	0.0567813	0.46997	0.0202962	0.438804	0.00976947	0.577444	0.0762375
	isoleucine	1.45169	0.0362176	1.33807	0.0659261	1.18603	0.102282	1.32647	0.096046
	N-acetyl-L-aspartic acid	1.01848	0.691093	1.00298	0.965579	1.08389	0.023576	1.08312	0.0150255
	N-acetyl-lysine	0.954652	0.678769	0.744593	0.0378998	1.10775	0.0978507	1.21138	0.0204808
	glycine	1.03925	0.462705	1.14871	0.0403784	1.09314	0.0602709	1.11614	0.0903805
Purines and pyrimidines	uracil	1.04438	0.724481	1.42461	0.0223325	0.996785	0.981721	1.01631	0.925173
	urea	0.962251	0.654349	0.859037	0.286045	1.4703	0.0110306	1.25073	0.0655785
	inosine	1.31983	0.0790032	1.61557	0.0353986	1.28055	0.116448	1.23471	0.276156
	adenosine	0.9543	0.806535	0.497871	0.0125464	1.72772	0.00584224	1.11521	0.515887
	adenosine-5-monophosphate	0.870799	0.538752	0.501536	0.0333718	0.991655	0.959169	1.03782	0.839864
	hypoxanthine	1.21111	0.202402	1.53203	0.153501	1.42942	0.0463134	1.38185	0.0954592
Others	hypotaurine	0.82849	0.228288	0.635772	0.0420574	0.685562	0.0484182	0.779526	0.201062
	3-Hydroxymethylglutaric acid	1.19349	0.12675	1.49802	0.00904843	1.43964	0.0080623	1.24379	0.00748613
	α-Tocopherol	0.85808	0.196308	0.789456	0.000776289	0.813774	0.00754847	0.790921	0.0087003
	pantothenic acid	0.916183	0.289818	0.871872	0.278802	0.632572	0.000920858	0.967884	0.836318
	O-phosphoethanolamine	0.92349	0.245697	0.94129	0.394409	1.10138	0.00731811	1.11306	0.0125276
	O-phosphocolamine	1.19517	0.0279366	1.28305	0.0357361	1.12323	0.0414976	1.14845	0.0405871
	aminomalonic acid	1.25176	0.32908	1.67446	0.00771098	0.851298	0.177118	1.08817	0.436248
	dihydroxyacetone phosphate	1.26159	0.203529	2.78949	0.00209754	1.41655	0.0645645	1.02223	0.914694
	2-hydroxybutyric acid	1.19794	0.663152	1.49853	0.337848	2.95921	0.00459546	2.87976	0.00750028

## Sheet: COR
	Supplementary Table 20. Statistics of DEMs in each period of fasting in COR.
FC: fold change, the ratio of metabolite level in each period pf fasting to that of Ctrl.
Category	Metabolite	F-3h vs. Ctrl		F-6h vs. Ctrl		F-12h vs. Ctrl		F-24h vs. Ctrl
		FC(F-3h/Ctrl)	p value	FC(F-6h/Ctrl)	p value	FC(F-12h/Ctrl)	p value	FC(F-24h/Ctrl)	p value
Carbohydrates and carbohydrate conjugates	deoxyglucose	0.990111	0.92633	1.00984	0.868117	1.06194	0.251741	1.11602	0.0321854
	threonic acid	1.26792	0.0728759	1.40921	0.0061243	0.980951	0.8967	0.973673	0.894271
	ribitol	0.85557	0.0283948	0.883542	0.110758	0.895919	0.0356533	0.973791	0.524815
	sorbitol	0.887062	0.432028	1.00934	0.960486	0.591455	0.00652442	0.694761	0.0133113
Glycolysis and TCA cycle	fructose-6-phosphate	1.50138	0.0981929	1.04422	0.872826	0.773739	0.207286	0.594138	0.0347237
	lactic acid	0.999302	0.97907	0.934308	0.015991	0.926929	0.0654178	0.911763	0.263598
	fumaric acid	1.27215	0.0592227	1.37246	0.0216354	1.22802	0.0489839	1.44879	0.00604851
	succinic acid	0.652715	0.226726	0.488766	0.0115355	0.992866	0.978952	1.05195	0.76054
Amino acid metabolism	N-acetyl-L-aspartic acid	0.986444	0.768072	0.910611	0.0136716	0.917141	0.0109602	0.939251	0.0342332
	ornithine	1.12575	0.514367	1.44765	0.0356285	0.935223	0.817551	1.38292	0.0602773
	methionine	0.56316	0.0586997	0.485571	0.00441668	0.430752	0.00249154	0.562682	0.00779356
	5'-methylthioadenosine	1.09957	0.309105	1.24835	0.00463804	1.227	0.0278348	1.28077	0.00149493
	isoleucine	1.28097	0.0874498	1.49359	0.00163827	1.57603	0.0420969	1.47322	0.00848213
	valine	1.18904	0.254646	1.54454	0.00170713	1.49251	0.0145513	1.36344	0.0071322
	2-aminoadipic acid	0.841715	0.183914	1.74408	0.00293692	0.996879	0.991335	1.66616	0.000301634
	pyroglutamic acid	0.971545	0.439822	0.951935	0.119896	0.911375	0.0166193	0.973555	0.465982
	glycine	1.07516	0.405646	1.19568	0.0845878	1.26884	0.000764278	1.35111	0.073728
	N-acetylaspartylglutamic acid	0.501047	0.0950745	0.784947	0.471157	0.554497	0.0412945	0.833668	0.338403
	tyrosine	0.840118	0.345846	0.726855	0.0437941	0.772115	0.235107	0.665385	0.00975292
	Phenylalanine	1.06983	0.420924	1.30968	0.00359085	0.880758	0.397633	1.0808	0.336693
Purines and pyrimidines	uridine 5'-monophosphate	0.614866	0.003652	0.777889	0.168481	1.05951	0.645777	1.14802	0.0950322
	hypoxanthine	1.17178	0.215009	1.39983	0.0169138	0.676425	0.224574	0.97632	0.930404
	inosine	1.27003	0.137934	1.40789	0.0442264	0.909267	0.399117	1.02104	0.921113
	adenine	1.09429	0.599764	1.02926	0.798666	1.24395	0.0206544	1.13444	0.274884
	adenosine-5-monophosphate	0.765928	0.0259494	0.785621	0.0120476	1.00841	0.959185	1.10717	0.220596
Others	O-phosphocolamine	1.16917	0.00332393	1.16351	0.0102397	1.03434	0.485153	1.18867	0.0105433
	pantothenic acid	0.937095	0.752113	0.85629	0.165185	0.632743	0.00931134	0.910434	0.401403
	2-hydroxybutyric acid	0.890345	0.715435	1.38538	0.412219	3.13897	0.0257789	3.9033	0.000849532
	aminomalonic acid	1.53674	0.0721495	1.49322	0.00630852	0.987199	0.91424	1.21267	0.444098
	methylphosphate	0.965818	0.86621	0.929022	0.473289	1.32109	0.00540316	1.15137	0.0943284

## Sheet: HIP
	Supplementary Table 21. Statistics of DEMs in each period of fasting in HIP.
FC: fold change, the ratio of metabolite level in each period pf fasting to that of Ctrl.
Category	Metabolite	F-3h vs. Ctrl		F-6h vs. Ctrl		F-12h vs. Ctrl		F-24h vs. Ctrl
		FC(F-3h/Ctrl)	p value	FC(F-6h/Ctrl)	p value	FC(F-12h/Ctrl)	p value	FC(F-24h/Ctrl)	p value
Fatty acyls and glycerolipids	hexanoic acid	0.765985	0.111302	0.836341	0.254043	0.876764	0.309554	0.68941	0.0437353
	nonanoic acid	0.788023	0.0727833	0.959255	0.825224	0.787774	0.175614	0.631008	0.0438914
	palmitic acid	0.8306	0.164478	0.895113	0.295517	0.863349	0.223604	0.746187	0.0413413
	heptadecanoic acid	0.723869	0.000990777	0.743058	0.00147066	0.782993	0.0900868	0.698655	0.000513561
	stearic acid	0.83	0.0397931	0.863846	0.0454698	0.888944	0.195547	0.778816	0.00693831
	trans-9-Octadecenoic acid	0.843892	0.273138	0.936992	0.757238	1.06366	0.768284	0.66965	0.0483849
	11-eicosenoic acid	0.666161	0.0572495	0.735941	0.19183	0.814297	0.351694	0.519609	0.0383764
	docosanoic acid	0.695685	0.0969245	0.640073	0.0218238	0.925066	0.670332	0.502914	0.00823807
	cis-7,10,13,16-docosatetraenoic acid	0.747146	0.00136336	0.834377	0.0192498	0.87013	0.156186	0.724805	0.00558542
	tetracosanoic acid	0.774164	0.277036	0.758025	0.329205	1.00271	0.990712	0.420054	0.037684
	stearamide	0.837513	0.225302	0.846228	0.189026	0.96401	0.775148	0.774745	0.0458885
	methyl stearate	1.30199	0.371609	1.96122	0.219289	2.13665	0.0183264	1.37046	0.329717
	MG(16:0/0:0/0:0)	1.59143	0.0157136	1.62734	0.00213205	1.75317	0.0286057	1.53336	0.0780051
	MG(18:1(9Z)/0:0/0:0)	0.796485	0.108792	0.611816	0.02099	0.798083	0.106266	0.629305	0.0650442
	glycerophosphoric acid	1.38642	0.0125671	1.29162	0.129337	1.25384	0.0420043	1.40697	0.0548603
Carbohydrates and carbohydrate conjugates	L-fucose	0.831988	0.433472	1.0771	0.789068	0.601477	0.0252184	0.83881	0.482122
	deoxyglucose	1.10099	0.261228	1.05917	0.517649	1.08824	0.31991	1.23818	0.0343305
	threonic acid	1.18274	0.320183	1.63815	0.0253918	1.22376	0.189609	1.11021	0.604052
	N-acetylneuraminic acid	1.03698	0.513523	1.05981	0.335361	1.02486	0.571345	1.11468	0.0101399
	sorbitol	1.07072	0.572715	0.987803	0.935344	0.667585	0.0219705	0.771984	0.113999
	ribitol	1.09557	0.100757	1.04042	0.22802	1.17602	0.0235442	1.12089	0.0652043
	scyllo-inositol	1.26825	0.0925114	1.30459	0.187154	1.34021	0.0217998	1.45437	0.00346843
Glycolysis and TCA cycle	pyruvic acid	0.73571	0.0132561	0.71081	0.00060031	0.831893	0.194686	0.973129	0.783324
	glucose-6-phosphate	8.30117	0.0419441	6.05792	0.0848299	2.48496	0.136214	1.00853	0.99088
	succinic acid	0.626054	0.0298805	0.517197	0.0552358	0.677734	0.126727	1.39309	0.336683
	fumaric acid	1.15823	0.340264	1.08276	0.600075	1.45859	0.0153636	1.53792	0.0378197
Amino acid metabolism	γ-aminobutyric acid	1.26747	0.0709711	1.23179	0.00927277	1.31445	0.0156836	1.57589	0.00601995
	alanine	1.62979	0.0262142	1.36955	0.194764	1.33545	0.0895077	1.466	0.0616538
	glutathione	1.32133	0.0031627	1.09205	0.174982	1.20795	0.0466595	2.25429	0.023102
	pyroglutamic acid	0.904285	0.00873446	0.884648	0.022321	0.898661	0.0115543	0.911846	0.0257159
	homocysteine	0.270824	0.00856925	0.251855	0.0447708	0.34801	0.0314815	0.717391	0.482902
	methionine	0.546038	0.0142652	0.44911	0.0379914	0.36892	0.00916224	0.511263	0.0529528
	ornithine	1.23076	0.097816	1.39728	0.0322726	1.13858	0.501837	1.35109	0.000541027
	2-aminoadipic acid	1.63976	0.0789849	1.70555	0.00734216	1.29083	0.169073	1.89471	0.00357647
	N-acetyl-lysine	0.834476	0.10839	0.630987	0.0168454	0.856551	0.153126	0.914	0.508657
	glycine	0.924469	0.110829	1.09064	0.0203495	1.13965	0.39755	1.21928	0.130708
	isoleucine	1.2547	0.180279	1.40238	0.0878865	1.38508	0.0473162	1.52718	0.0221567
	tyrosine	0.637424	0.0502794	0.614429	0.134585	0.458294	0.0243889	0.545434	0.0886174
Purines and pyrimidines	urea	0.993501	0.950818	0.977409	0.878371	1.44649	0.0466671	1.5353	0.0232209
	uridine 5'-monophosphate	1.255	0.11814	1.18812	0.282596	1.24221	0.122603	1.51946	0.02692
	oxalic acid	0.74356	0.00403169	0.74552	0.0462955	0.894355	0.426643	0.728315	0.0320312
	inosine	1.17762	0.250592	1.57312	0.0496513	0.889914	0.545671	1.05809	0.791289
Others	O-phosphocolamine	1.20852	0.0171892	1.33582	0.0679436	1.19784	0.0536946	1.41889	0.00206345
	nicotinamide	1.10023	0.0605498	1.10617	0.143592	1.06182	0.278789	1.12045	0.0258797
	3-hydroxymethylglutaric acid	1.25685	0.137901	1.1789	0.336341	1.20189	0.215397	1.49689	0.0347594
	2-hydroxypyridine	0.985718	0.671343	1.06756	0.353293	1.18121	0.00883849	0.985272	0.765105
	pantothenic acid	0.962176	0.678489	0.891382	0.372052	0.639007	0.0205666	1.0537	0.679171
	2-hydroxybutyric acid	1.13248	0.547328	1.31125	0.332415	2.93061	0.0262568	4.11769	0.00565189
	dihydroxyacetone phosphate	2.05963	0.10137	3.95127	0.0311691	1.81007	0.0910224	0.81496	0.655829
	cholesterol	0.791135	0.0346705	0.922346	0.60793	1.01892	0.87836	0.720849	0.0712713

## Sheet: OB
	Supplementary Table 22. Statistics of DEMs in each period of fasting in OB.
FC: fold change, the ratio of metabolite level in each period pf fasting to that of Ctrl.
Category	Metabolite	F-3h vs. Ctrl		F-6h vs. Ctrl		F-12h vs. Ctrl		F-24h vs. Ctrl
		FC(F-3h/Ctrl)	p value	FC(F-6h/Ctrl)	p value	FC(F-12h/Ctrl)	p value	FC(F-24h/Ctrl)	p value
Fatty acyls and glycerolipids	hexanoic acid	1.3829	0.106558	1.03684	0.826934	1.48197	0.022683	1.19652	0.226092
	palmitic acid	0.882599	0.305399	0.91635	0.141504	0.954407	0.566803	0.784188	0.00110505
	heptadecanoic acid	0.850583	0.260669	0.849896	0.00367768	0.905242	0.239186	0.776702	0.0194614
	stearic acid	0.943423	0.716143	0.887469	0.013579	0.947169	0.553971	0.812178	0.00514379
	linoleic acid	0.868126	0.231996	1.2752	0.183645	1.45929	0.0202006	1.33399	0.0347344
	arachidonic acid	1.14191	0.24741	1.0846	0.0614356	1.19008	0.027662	1.06831	0.108591
	stearamide	0.950821	0.756499	0.929322	0.127118	0.984523	0.870345	0.836141	0.0490581
	methyl stearate	1.71607	0.0326574	1.73717	0.142686	2.7261	0.0225282	2.0085	0.00843018
	MG(0:0/16:0/0:0)	1.47476	0.028544	1.20055	0.352054	1.39565	0.101643	1.30755	0.0960695
	glycerol	1.14676	0.0760221	1.15591	0.0506674	1.23098	0.00439509	1.12027	0.0635452
	glycerol 2-Phosphate	0.91668	0.373641	0.807354	0.0880388	0.762614	0.0361768	0.849206	0.191104
	glycerol-3-Phosphate	0.796374	0.215773	0.530355	0.00398066	0.596623	0.0448323	0.72033	0.104138
Carbohydrates and carbohydrate conjugates	D-lyxose	1.36827	0.0394859	1.9005	0.00250106	1.73707	0.016616	1.54383	0.0656192
	deoxyglucose	0.912828	0.047219	0.954197	0.0982088	1.00288	0.940131	1.06962	0.242565
	N-acetylneuraminic acid	0.989898	0.909634	1.11552	0.0180864	1.0417	0.471724	1.14194	0.080716
	2-keto-gluconic acid	1.16661	0.353265	1.36392	0.000741653	1.29128	0.00521702	1.08961	0.438377
	sorbitol	0.842934	0.118438	0.864125	0.114249	0.590798	0.0049307	0.674451	0.00205233
	ribitol	0.93378	0.451614	0.975057	0.523434	1.00667	0.812815	1.0974	0.0468015
	threitol	0.994127	0.930138	1.11259	0.269551	0.871824	0.0867891	0.844038	0.00311988
Glycolysis and TCA cycle	pyruvic acid	0.728974	0.0422844	0.8427	0.0695797	0.929311	0.601558	0.744358	0.0153881
	fructose-6-Phosphate	1.11797	0.791148	1.47293	0.0274857	1.12544	0.577235	1.59565	0.0113758
	fructose	0.865339	0.466385	1.36559	0.685741	0.594792	0.0293645	0.756622	0.0926096
	glucose	0.682691	0.105234	1.05258	0.927708	0.440746	0.0495766	0.65678	0.0725028
	3-phosphoglyceric acid	0.990538	0.967163	1.45219	0.102341	0.998276	0.993851	0.719319	0.0178316
	citric acid	1.0505	0.767595	1.56936	0.00227795	1.35341	0.0623237	1.2937	0.25786
	fumaric acid	1.37307	0.00289745	1.62162	0.000836521	1.72216	0.0048518	1.51972	0.0152687
	succinic acid	0.347143	0.00755934	0.271221	0.00232135	0.330461	0.028078	0.402507	0.0131335
Amino acid metabolism	alanine	1.55626	0.06273	1.41546	0.0833404	1.43511	0.121934	1.63575	0.0139296
	N-acetylaspartylglutamic acid	0.578445	0.0103608	0.817032	0.21887	0.584036	0.0374721	0.769378	0.083907
	pyroglutamic acid	0.865021	0.0387886	0.89664	0.102891	0.86584	0.117199	0.857453	0.0341461
	glutamine	2.60866	0.194078	1.30636	0.64593	2.53517	0.0247132	1.90534	0.0631723
	cysteine	1.53034	0.0678633	2.40738	0.0415245	2.74519	0.00949545	2.77654	0.0272153
	homocysteine	0.736255	0.113796	0.681168	0.0189923	1.29498	0.553047	0.737109	0.203647
	methionine	0.424652	0.0113587	0.406843	0.00864583	0.441706	0.0574919	0.605803	0.0499222
	o-succinylhomoserine	0.780734	0.213007	0.839498	0.507323	0.830676	0.061718	0.745467	0.00645494
	ornithine	1.54543	0.0949377	1.38056	0.0254466	1.45772	0.0588449	1.85616	0.0026678
	citrulline	1.40652	0.0718714	1.3531	0.12183	1.92458	0.00676048	1.83872	0.00035451
	creatinine	2.86212	0.113334	1.75346	0.29881	3.34685	0.00236727	3.14314	0.000117166
	asparagine	2.48509	0.0721354	1.5219	0.288454	2.40054	0.00014717	2.07968	0.0496999
	N-acetyl-L-aspartic acid	0.91756	0.0523809	0.931184	0.101519	0.911246	0.0535664	0.906966	0.0178802
	isoleucine	1.21863	0.370731	1.39386	0.0293476	1.475	0.0190123	1.40315	0.00568738
	leucine	1.19542	0.340516	1.1377	0.0851697	1.25589	0.0355202	1.05048	0.757362
	valine	1.39937	0.16727	1.47942	0.000133198	1.67707	0.0188174	1.559	0.00423895
	glycine	0.897735	0.152617	1.22909	0.0218179	1.16912	0.0178894	1.17634	0.138181
	lysine	1.21583	0.301982	1.12539	0.505709	1.38407	0.0339005	1.41491	0.0184708
	2-aminoadipic acid	1.15136	0.702571	1.51554	0.101345	1.36592	0.162901	2.0815	0.00835871
	tyrosine	0.534434	0.0183538	0.634107	0.0603004	0.489398	0.0591376	0.624597	0.0572803
	mimosine	0.737111	0.0185576	0.86177	0.0569595	0.870587	0.27033	0.810789	0.0414625
Purines and pyrimidines	uracil	0.929311	0.562445	1.46645	0.0244198	1.17439	0.187827	1.21356	0.429219
	uridine	1.08997	0.228278	1.49874	0.000564639	1.38316	0.0234294	1.23463	0.113695
	uridine 5'-monophosphate	0.698483	0.126493	0.657357	0.0361403	0.653984	0.102774	0.808452	0.131175
	xanthine	2.02677	0.0646941	3.01654	0.018082	3.34365	0.0204712	2.3595	0.0226352
	hypoxanthine	1.33988	0.314661	2.55252	0.0145234	2.54305	0.0246441	2.08933	0.0212241
	inosine	1.29521	0.175191	2.25042	0.00265725	2.42508	0.012918	1.91787	0.00406571
	guanosine	1.59234	0.0764745	2.72146	0.0025081	2.73373	0.0154669	1.88324	0.0168285
	adenosine	1.7305	0.00885865	1.35351	0.127022	1.32953	0.104141	1.3118	0.0843827
	adenosine-5-monophosphate	0.502838	0.0100411	0.195335	4.63644e-06	0.277205	0.000373203	0.510018	0.000298542
Others	α-Tocopherol	0.987398	0.930976	0.770426	0.0497882	0.963184	0.321112	0.867653	0.048634
	pantothenic acid	0.924207	0.15105	0.895019	0.231346	0.6685	0.000764472	0.883491	0.153427
	nicotinamide	1.02884	0.683659	1.14502	0.0280267	1.01308	0.831266	1.07911	0.180158
	O-phosphocolamine	1.15194	0.0638927	1.27143	0.0189729	1.05328	0.29348	1.15503	0.0112654
	O-phosphoethanolamine	1.03526	0.14599	1.08772	0.077042	1.14616	0.00664067	1.08783	0.123246
	3-hydroxypyridine	1.10278	0.439725	1.00908	0.902342	1.21615	0.0125223	1.03662	0.662279
	2-hydroxybutyric acid	1.28739	0.450512	1.70856	0.0711639	2.55728	0.0405867	3.34652	0.0148388
	dihydroxyacetone phosphate	2.42745	0.0732142	3.26389	0.0101306	2.97113	0.0273986	3.02568	0.00597015

## Sheet: CBL
	Supplementary Table 23. Statistics of DEMs in each period of fasting in CBL.
FC: fold change, the ratio of metabolite level in each period pf fasting to that of Ctrl.
Category	Metabolite	F-3h vs. Ctrl		F-6h vs. Ctrl		F-12h vs. Ctrl		F-24h vs. Ctrl
		FC(F-3h/Ctrl)	p value	FC(F-6h/Ctrl)	p value	FC(F-12h/Ctrl)	p value	FC(F-24h/Ctrl)	p value
Fatty acyls and glycerolipids	9-Hexadecenoic acid	0.38935	0.0201131	0.998891	0.993855	1.05128	0.802734	0.978588	0.91325
	cis-9-Hexadecenoic acid	0.918474	0.104858	2.06162	0.252338	0.970578	0.887919	0.72412	0.0252014
	linoleic acid	1.10188	0.758761	1.25553	0.0992075	1.5083	0.0270653	1.41922	0.00292934
	glycerol	1.07384	0.790662	1.15097	0.0278089	1.05431	0.153021	1.05308	0.271079
Carbohydrates and carbohydrate conjugates	L-fucose	0.723184	0.585786	1.88655	0.0182169	0.872544	0.466493	1.15886	0.635738
	threonic acid	0.918847	0.818931	1.42194	0.0344584	1.13635	0.279498	1.0502	0.693894
	sorbitol	1.04478	0.855943	0.960642	0.836457	0.633308	0.0443085	0.65859	0.0147871
Amino acid metabolism	isoleucine	1.58981	0.0716554	1.09519	0.507029	1.23478	0.0533294	1.30902	0.0389172
	valine	1.22592	0.25546	1.27513	0.119516	1.2111	0.0640963	1.24166	0.0127691
	ornithine	1.3007	0.0384638	1.39361	0.0930208	1.15091	0.424623	1.23722	0.355963
	glutamic acid	1.12743	0.0327579	1.10853	0.350336	0.906225	0.253493	1.02666	0.690213
	pyroglutamic acid	0.924838	0.272485	0.93652	0.220063	0.920778	0.0831666	0.906736	0.0182053
	2-aminoadipic acid	2.56853	0.0197982	2.14112	0.0764984	1.3037	0.12568	2.30203	0.0131038
	pipecolic acid	1.21102	0.0464125	1.0418	0.548068	0.931136	0.236534	0.975623	0.709203
	glycine	0.843247	0.0176103	1.10658	0.0979981	1.24134	0.0332377	1.22398	0.205826
	cysteine	0.691747	0.612018	1.69515	0.00552676	1.58897	0.0724615	1.99464	0.00946307
	methionine	0.615252	0.0972149	0.422898	0.0935151	0.462483	0.0489965	0.604787	0.0446795
	β-alanine	1.03786	0.367884	1.18735	0.250561	1.1168	0.457927	1.40692	0.0439249
	tyrosine	0.910197	0.292676	0.624931	0.185751	0.578284	0.0814852	0.621481	0.0388833
Purines and pyrimidines	urea	0.660611	0.0730889	0.953363	0.616649	1.47537	0.00654119	1.24272	0.0763953
	hypoxanthine	0.670887	0.131695	1.58767	0.0470315	1.09751	0.58816	1.46613	0.229872
Others	cholesterol	0.805266	0.0639669	0.954059	0.238604	1.20814	0.024684	0.960642	0.736317
	pantothenic acid	0.730421	0.0125037	0.735195	0.0115992	0.664883	0.00197416	0.726178	0.00117248
	O-phosphoethanolamine	0.786842	0.199142	1.2127	0.0297446	1.15454	0.0742409	1.17572	0.0519666
	O-phosphocolamine	0.961969	0.810261	1.17295	0.215842	1.00778	0.934159	1.20699	0.0457871
	2-hydroxypyridine	0.754694	0.0781758	0.892058	0.0308833	0.98755	0.636066	0.919606	0.184117
	2-hydroxybutyric acid	1.37939	0.738598	1.71435	0.0192124	3.49131	0.00370219	3.71466	0.0044832
	dihydroxyacetone phosphate	0.712822	0.0390133	1.57132	0.00958821	1.47206	0.00924364	1.17781	0.602573

## Sheet: Liver
	Supplementary Table 24. Statistics of DEMs in each period of fasting in liver.
FC: fold change, the ratio of metabolite level in each period pf fasting to that of Ctrl.
Category	Metabolite	F-3h vs. Ctrl		F-6h vs. Ctrl		F-12h vs. Ctrl		F-24h vs. Ctrl
		FC(F-3h/Ctrl)	p value	FC(F-6h/Ctrl)	p value	FC(F-12h/Ctrl)	p value	FC(F-24h/Ctrl)	p value
Fatty acyls and glycerolipids	Nonanoic acid	0.91234	0.545987	1.33179	0.0287278	1.45561	0.00560387	1.46984	0.00231936
	Myristic acid	1.80294	0.0062658	2.52556	6.27669e-05	2.39326	6.96597e-05	2.52337	2.84965e-05
	Palmitic acid	1.45226	0.00195787	1.69357	0.000360706	1.98979	1.72052e-07	1.97113	7.20342e-06
	Trans-9-Hexadecenoic acid	2.10245	0.000239214	2.11494	0.000937368	2.48379	2.64996e-05	2.53941	8.76629e-05
	cis-9-Hexadecenoic acid	2.57184	0.000116063	3.10721	6.18382e-05	2.61757	3.83676e-05	2.02736	0.00093361
	Heptadecanoic acid	1.21894	0.168633	1.14123	0.373112	1.38002	0.000513157	1.47131	0.00219048
	Stearic acid	1.11618	0.253665	1.33344	0.126215	1.5044	0.000288762	1.59927	0.000268572
	Oleic acid	1.90826	0.000710007	1.87004	0.00085579	1.99408	0.000344912	2.01847	0.000362579
	Linoleic acid	1.90646	0.00134088	2.17085	9.99826e-05	2.40421	1.08688e-06	2.39864	5.51399e-06
	Gamma-Linolenic acid	1.69609	0.0116185	3.03903	2.01073e-05	3.37752	8.79164e-10	3.61193	4.93488e-08
	11-Eicosenoic acid	1.33113	0.0449177	1.07955	0.582892	1.24933	0.0611272	1.42318	0.0281889
	cis-5,8,11-Eicosatrienoic acid	1.21163	0.137513	0.873784	0.376626	0.813756	0.109641	0.734206	0.0448306
	Arachidonic acid	1.20287	0.135931	1.15771	0.386014	1.42132	0.000566025	1.48825	0.003778
	cis-5,8,11,14,17-Eicosapentaenoic acid	1.93562	0.00012764	2.9605	1.33327e-05	3.12236	5.28625e-05	1.96358	2.3713e-05
	Docosanoic acid	1.34549	0.0523626	2.2357	1.21214e-05	2.56393	2.38909e-05	3.22779	1.39731e-07
	Methyl linoleate	2.72263	0.00177152	1.67344	0.0775702	1.69096	0.0174427	0.821473	0.316905
	MG(16:0/0:0/0:0)	0.931239	0.711019	1.06186	0.784718	1.27333	0.132948	1.51007	0.0300902
	MG(18:0/0:0/0:0)	0.914242	0.562342	1.15498	0.479219	1.24895	0.107288	1.48885	0.00888303
	MG(0:0/18:2(9Z,12Z)/0:0)	2.38785	0.0129502	1.85491	0.0506751	2.71183	0.00748501	1.48204	0.140891
	MG(18:2(9Z,12Z)/0:0/0:0)	1.11883	0.549594	1.06276	0.759866	1.53473	0.00783955	1.38238	0.0576356
	Glycerol	1.61337	3.88293e-05	1.62468	1.66647e-05	1.51221	0.000924024	1.57218	2.7943e-05
	Glycerophosphoric acid	1.42578	0.240808	0.881094	0.663761	0.536334	0.0494715	0.432155	0.0163183
Carbohydrates and carbohydrate conjugates	Melibiose	1.39005	0.0273596	0.591133	0.0309116	0.753348	0.332132	0.348125	0.000332999
	Deoxyglucose	0.679628	0.0222495	0.905317	0.478755	0.900824	0.47804	0.913443	0.483703
	Sophorose	1.84943	0.0107803	0.38817	0.0712736	0.21868	0.00625839	0.121086	0.00210013
	Maltose	1.34574	0.30465	0.111751	0.00774113	0.0463291	0.00410245	0.0230898	0.00340262
	Maltotriose	0.697953	0.446235	0.0861168	0.0276574	0.0805061	0.0269997	0.0441627	0.02216
	Mannose	0.823135	0.400403	0.427459	0.0145968	0.409608	0.00999024	0.371525	0.0064692
	Isopropyl beta-D-1-Thiogalactopyranoside	1.02517	0.897157	0.32846	0.00438516	0.301284	0.00216952	0.274424	0.00145082
	Galactonic acid	0.806322	0.303966	1.47657	0.0243474	1.68985	0.0121744	1.88777	0.000265719
	Glucuronic acid	0.512322	0.146159	2.54196	0.0210736	2.1858	0.0721546	0.783645	0.528992
	Ribonic acid	1.01	0.964508	1.82602	0.00776475	1.39869	0.12428	1.85381	0.000252416
	Ribonic acid-gamma-lactone	0.493618	0.000488252	0.601679	0.00609791	0.569677	0.0115237	0.601264	0.00246805
	Threonic acid	1.31234	0.220954	1.96575	0.0194853	1.58821	0.0260611	2.03939	0.00438764
	2-Keto-Gluconic acid	1.01117	0.961783	1.73404	0.0101087	1.35833	0.18393	1.6579	0.0021177
	N-Acetylneuraminic acid	1.05184	0.796551	1.11073	0.529461	1.25121	0.165175	1.38308	0.0407914
	Xylitol	1.02696	0.881416	0.713361	0.0393119	0.663407	0.0154186	0.54063	0.00172771
	Sorbitol	1.01299	0.976796	0.395854	0.0503072	0.286275	0.0201138	0.29322	0.0207485
	Scyllo-Inositol	0.873761	0.400043	1.3004	0.0899335	1.52241	0.00699236	1.72735	0.000296491
	Myo-Inositol	0.920476	0.57033	1.22368	0.143418	1.33563	0.0463126	1.31835	0.0377946
	Inositol 4-Monophosphate	0.897843	0.647132	1.6362	0.0121906	1.4841	0.0553475	1.54192	0.0285882
Glycolysis and TCA cycle	Fructose	0.497651	0.164047	0.220483	0.0364562	0.210244	0.0343666	0.155539	0.0249039
	Glucose	1.01174	0.932982	0.472503	0.00382305	0.501581	0.00355975	0.464073	0.00132702
	Lactic acid	0.739235	0.121829	0.518034	0.000779328	0.560127	0.00304818	0.452663	0.000222441
	Malic acid	0.502934	0.0098643	0.67331	0.0731491	0.657017	0.0736564	0.78408	0.23952
	Fumaric acid	0.529648	0.0212249	0.712778	0.135832	0.714038	0.168511	0.869076	0.495457
	2-Hydroxyglutaric acid	0.704156	0.0257595	1.03951	0.773349	1.0673	0.682762	1.30347	0.0210049
Amino acid metabolism	Phosphate	0.927868	0.413045	1.33898	0.00891173	1.32926	0.00224263	1.33963	0.00149941
	Pyrophosphate	0.639799	0.377238	2.53099	0.0133656	1.18565	0.653666	1.19791	0.675175
	Alanine	0.7606	0.0636361	0.817113	0.139477	0.747824	0.0666672	0.785888	0.100703
	Pyroglutamic acid	0.770335	0.0189674	0.881247	0.159496	0.915393	0.308584	1.01617	0.852689
	Glutathione reduced	0.407892	0.0156171	0.739672	0.25103	0.451598	0.0148304	0.515005	0.0397497
	Homocysteine	5.70648	0.00224178	3.4969	0.02963	4.98088	0.0231109	38.6379	0.148056
	2-Aminobutyric acid	0.610527	0.0463465	1.05014	0.796896	1.46345	0.0780079	2.06947	0.000858036
	Aspartic acid	1.30832	0.300179	1.54581	0.0943123	1.28102	0.191451	1.52172	0.0458817
	Sarcosine	0.700477	0.11738	0.685138	0.112412	0.764622	0.230693	0.543623	0.0248511
	2-Aminoadipic acid	0.480903	0.470635	6.47119	0.0966956	2.42472	0.111481	5.1816	0.0061891
Purines and pyrimidines	Guanosine	0.693056	0.0320766	1.50358	0.263388	0.856725	0.261961	0.85237	0.200648
	Hypoxanthine	0.758486	0.201337	1.10325	0.564802	1.30059	0.123246	1.43796	0.0286927
	adenine	0.786361	0.165001	0.88427	0.538987	0.779245	0.212597	0.570982	0.012595
	Oxalic acid	1.02109	0.858202	1.29023	0.047635	1.42414	0.00122779	1.40577	0.00239475
	Allantoin	1.10918	0.576197	1.597	0.0115647	1.47608	0.0115762	1.38571	0.0289754
Others	α-Tocopherol	0.861768	0.353016	0.768052	0.122529	0.730167	0.0347082	0.548463	0.00130344
	Pantothenic acid	1.00426	0.983301	1.06866	0.731614	1.17364	0.362826	1.58601	0.00525994
	Ethanolamine	1.10565	0.575064	1.21066	0.220392	1.37428	0.0499486	1.43993	0.0566249
	O-Phosphoethanolamine	0.928793	0.652232	1.94759	0.000135459	1.71705	0.00136145	1.67401	0.00206022
	Taurine	0.750846	0.479479	2.506	0.00756364	2.53265	0.00165038	2.32264	0.0287887
	3-Hydroxybutyric acid	1.00088	0.997437	3.14298	0.000628489	3.93753	0.0144089	4.91323	1.81457e-07
	2-Hydroxybutyric acid	0.527236	0.0294954	0.952421	0.821352	1.28622	0.324905	1.02845	0.885342
	Campesterol	0.892596	0.537668	0.878882	0.424092	0.899512	0.506822	0.635083	0.0347891
