# Supplementary material for: A metabolome atlas of mouse brain on the global metabolic signature dynamics following short-term fasting
Source: Signal Transduct Target Ther. 2023 Sep 8;8:334. doi: 10.1038/s41392-023-01552-y (PMC10484938; doi:10.1038/s41392-023-01552-y)
Supplement: Supplementary file 7 — Dataset 6 [file 41392_2023_1552_MOESM7_ESM.xlsx]

## Sheet: Sheet1
Supplementary Table 25. Statistics of alterations in BCAAs/ArAAs ratios after short-term fasting in seven brain regions.
Note: A two-sided independent Student’s t-test was applied to determine significant difference between each time point and controls within each brain regions.
	BCAAs/ArAAs ratio					p value
	Ctrl	F-3h	F-6h	F-12h	F-24h	Ctrl vs. F-3h	Ctrl vs. F-6h	Ctrl vs. F-12h	Ctrl vs. F-24h
SC	2.03	2.63	2.75	3.28	2.59	0.0038	0.0009	0.0093	0.0941
BST	1.96	3.06	3.03	3.8	3.21	0.0146	0.0356	0.008	0.0429
HYT	2.47	3.27	3.14	3.37	3.47	0.0977	0.1068	0.055	0.1894
COR	2.07	2.7	3.32	3.8	3.37	0.0473	0.0078	0.0353	0.003
HIP	2.06	3.2	3.39	4.45	3.69	0.0212	0.0817	0.0013	0.0033
OB	1.88	3.62	3.07	4.24	3.1	0.0244	0.0019	0.0044	0.0101
CBL	2.1	2.82	2.95	3.42	3.24	0.1739	0.2605	0.0558	0.0625
