# Supplementary material for: A metabolome atlas of mouse brain on the global metabolic signature dynamics following short-term fasting
Source: Signal Transduct Target Ther. 2023 Sep 8;8:334. doi: 10.1038/s41392-023-01552-y (PMC10484938; doi:10.1038/s41392-023-01552-y)
Supplement: Supplementary file 8 — Dataset 7 [file 41392_2023_1552_MOESM8_ESM.xlsx]

## Sheet: Sheet1
						Supplementary Table 26. Changes in mRNA expression level of genes that involoved in metabolic pathways .
The data were downloaded from the Supplementary Materials of the paper reported previously (doi: 10.1016/j.molmet.2020.101038).
Normalized counts (NCs) for all filtered genes in OB, CBL and BST were used for reanalysis. Because the presnet study did not coverage the other tissue types, data of the remained tissue types were not used here.
p values were calculated using Student's t test.
Metabolic pathway	gene name	enzyme	OB										CBL										BST
			F-2h vs. Ctrl		F-8h vs. Ctrl		F-12h vs. Ctrl		F-18h vs. Ctrl		F-22h vs. Ctrl		F-2h vs. Ctrl		F-8h vs. Ctrl		F-12h vs. Ctrl		F-18h vs. Ctrl		F-22h vs. Ctrl		F-2h vs. Ctrl		F-8h vs. Ctrl		F-12h vs. Ctrl		F-18h vs. Ctrl		F-22h vs. Ctrl
			FC(F-2h/Ctrl)	p value	FC(F-8h/Ctrl)	p value	FC(F-12h/Ctrl)	p value	FC(F-18h/Ctrl)	p value	FC(F-22h/Ctrl)	p value	FC(F-2h/Ctrl)	p value	FC(F-8h/Ctrl)	p value	FC(F-12h/Ctrl)	p value	FC(F-18h/Ctrl)	p value	FC(F-22h/Ctrl)	p value	FC(F-2h/Ctrl)	p value	FC(F-8h/Ctrl)	p value	FC(F-12h/Ctrl)	p value	FC(F-18h/Ctrl)	p value	FC(F-22h/Ctrl)	p value
Tyrosine metabolism	Ddc	dopa decarboxylase	1.06135	0.728744	0.885114	0.335924	0.868003	0.226624	1.07626	0.48994	1.00856	0.945479	1.45846	0.0781455	1.73036	0.0142317	1.92598	0.0715182	1.54154	0.127591	1.91012	0.0121756	1.15185	0.403466	0.853118	0.272132	0.871435	0.334502	0.815926	0.193369	0.898839	0.452909
	Drd1	dopamine receptor D1	1.09952	0.442164	0.814493	0.19752	1.12754	0.352192	0.826087	0.0875769	0.855072	0.0433424	3.12281	0.0240027	2.82456	0.153139	0.894737	0.898174	1.05263	0.949972	1.49123	0.452088	0.825065	0.601067	0.480418	0.127737	0.558747	0.173647	0.475196	0.16996	0.681462	0.370455
Alanine, aspartate and glutamate metabolism	Gpt2	glutamic pyruvate transaminase (alanine aminotransferase) 2	1.1661	0.194236	1.09199	0.412685	1.06932	0.574839	0.957607	0.710562	1.07537	0.510888	1.25478	0.00119065	1.20062	0.107222	1.22458	0.013201	1.07762	0.420369	1.30256	0.000459103	1.20766	0.0585802	1.10994	0.166869	1.16927	0.0442881	1.06794	0.453209	1.18664	0.00199158
	Rimkla	ribosomal modification protein rimK-like family member A	0.97112	0.670833	0.941055	0.497239	0.877518	0.0574424	0.862559	0.0400512	1.05613	0.378088	1.04413	0.696769	0.902367	0.430085	1.05899	0.699584	1.06894	0.570463	0.928776	0.534116	1.0262	0.856006	1.1298	0.376396	1.11872	0.389204	1.05828	0.665052	1.06492	0.627881
	Rimklb	ribosomal modification protein rimK-like family member B	0.928277	0.0152741	1.00421	0.878957	0.880987	0.0222035	1.06372	0.186804	0.983203	0.300089	0.988356	0.883728	0.924744	0.177451	0.966253	0.685673	1.0814	0.261558	1.01553	0.775013	0.979214	0.687466	0.957001	0.45002	0.983566	0.813358	1.05741	0.324655	0.99077	0.867521
	Folh1	glutamate carboxypeptidase II (folate hydrolase 1)	0.935188	0.739412	0.835426	0.327219	0.880896	0.47351	0.583305	0.0981935	0.842891	0.338459	1.23506	0.146583	1.38005	0.0376661	1.44426	0.0175913	0.905897	0.445919	1.23869	0.0969705	1.14861	0.220069	1.3056	0.0153499	1.1454	0.0916481	1.05702	0.599157	1.17748	0.0859766
	Dnmt1	DNA methyltransferase (cytosine-5) 1	0.990655	0.840709	1.13325	0.030756	1.08589	0.147723	0.934326	0.245397	1.11046	0.0618289	0.98617	0.842257	1.18479	0.181626	0.978453	0.715485	1.12564	0.0802098	1.00624	0.912718	1.00602	0.927684	1.09043	0.287011	1.15738	0.104441	0.96331	0.559541	0.95654	0.641348
	Dnmt3a	DNA methyltransferase 3A	1.01132	0.720909	1.19721	0.0126063	1.18414	0.0221554	0.874427	0.171833	1.06913	0.104944	0.897064	0.000200742	0.969027	0.615382	0.826179	0.000159537	0.976921	0.713842	0.879438	0.0154563	1.11064	0.22973	0.988479	0.892382	1.06738	0.411009	1.05195	0.5851	1.01106	0.89385
	Hnmt	histamine N-methyltransferase	1.00159	0.982737	0.819585	0.0397966	0.937036	0.106669	1.10315	0.264093	0.864084	0.00763018	1.0322	0.467235	1.10756	0.520285	1.27032	0.00772796	0.861336	0.0581157	1.18116	0.0357669	0.975121	0.667526	0.975466	0.678288	0.903363	0.228302	0.979728	0.747695	0.985257	0.863188
Citrulline–nitric oxide cycle	Ass1	argininosuccinate synthetase 1	1.00279	0.971321	0.948468	0.271783	1.06825	0.214137	0.970752	0.873509	1.46518	0.0461419	0.558282	0.336132	1.12883	0.84764	0.803681	0.575483	1.19018	0.72316	1.29448	0.355739	0.581325	0.206227	0.911145	0.734012	1.07681	0.78208	1.04518	0.867237	1.12349	0.617355
	Asl	argininosuccinate lyase	0.928879	0.523857	0.8841	0.306425	0.869253	0.205787	1.14464	0.493877	1.08214	0.205023	1.10172	0.0359153	1.15365	0.144399	1.06172	0.256464	0.976804	0.791006	1.13556	0.215037	0.985023	0.903427	0.969423	0.820019	1.08612	0.519923	0.850234	0.258801	1.01186	0.9263
	Nos1	nitric oxide synthase 1, neuronal	1.02428	0.704399	1.37428	0.0136802	1.26056	0.0129591	0.82863	0.0886031	1.1803	0.118118	0.91216	0.375277	1.03346	0.719142	0.905299	0.210041	1.18268	0.0360033	0.99606	0.96611	1.07857	0.277312	0.995162	0.920132	0.957235	0.435742	1.00125	0.983252	0.927905	0.369306
