# Supplementary material for: A metabolome atlas of mouse brain on the global metabolic signature dynamics following short-term fasting
Source: Signal Transduct Target Ther. 2023 Sep 8;8:334. doi: 10.1038/s41392-023-01552-y (PMC10484938; doi:10.1038/s41392-023-01552-y)
Supplement: Supplementary file 9 — Dataset 8 [file 41392_2023_1552_MOESM9_ESM.xlsx]

## Sheet: SC
Supplementary Table 27. Statistics of differential lipids only in Ref group in SC.
FC: fold change, the ratio of metabolite level in each period pf fasting to that of Ctrl.
“↑”：Lipid that incresed after short-term fasting and 24-h refeeding.
“↓”：Lipid that decreased after short-term fasting and 24-h refeeding.
	Lipid	F-3h vs. Ctrl		F-6h vs. Ctrl		F-12h vs. Ctrl		F-24h vs. Ctrl		Ref vs. Ctrl
		FC(F-3h/Ctrl)	p value	FC(F-6h/Ctrl)	p value	FC(F-12h/Ctrl)	p value	FC(F-24h/Ctrl)	p value	FC(Ref/Ctrl)	p value
↑	DG 35:1|DG 17:0_18:1	1.24077	0.37661	1.7261	0.0524523	1.45714	0.156782	1.33394	0.3967	1.69865	0.0215228
	DG 40:1|DG 22:0_18:1	1.13879	0.648897	1.8959	0.0604213	1.41705	0.0839615	1.41164	0.189752	1.571	0.000634991
	DG 40:2|DG 18:1_22:1	1.15621	0.541232	1.72046	0.063834	1.39824	0.0621762	1.48539	0.158138	1.67049	0.000189013
	DG 42:2|DG 18:1_24:1	1.0978	0.572448	1.53894	0.124735	1.32731	0.105139	1.39102	0.0956281	1.48549	0.00780309
	DG 44:2|DG 18:1_26:1	1.28895	0.588888	1.97148	0.0708291	1.47471	0.166238	1.53429	0.131296	1.7966	0.00964242
	FA 19:0	1.07038	0.396731	1.46529	0.0846664	1.16815	0.367503	1.1126	0.38688	1.32532	0.00353167
	FA 22:0	1.11529	0.378696	2.48097	0.156355	1.33515	0.163265	1.52025	0.0910498	1.55138	0.00814489
	FA 22:1	1.24071	0.390934	1.62729	0.0680379	1.40705	0.125244	1.46676	0.140455	1.45072	0.0255749
	FA 23:1	1.35283	0.293503	2.36825	0.0885306	1.82905	0.0847743	1.84292	0.100677	1.7656	0.0477889
	FA 24:1	1.16783	0.312581	1.98138	0.119682	1.31487	0.177448	1.50079	0.0671539	1.4211	0.0125407
	FA 26:1	1.29214	0.314324	2.56157	0.14084	1.77574	0.0670833	2.24185	0.0595082	2.09082	0.00422765
	LPC 22:6	1.02636	0.868612	1.23001	0.106198	1.01941	0.425102	0.882253	0.138532	1.20659	0.00487017
	LPE 16:0	1.03851	0.593935	1.17019	0.156652	1.10912	0.0762254	1.02546	0.661361	1.39085	0.0094611
	LPE 16:1	0.978476	0.910329	1.35544	0.13823	1.36062	0.374377	1.86919	0.49631	1.45171	0.0327532
	LPE 18:1	1.26149	0.243733	1.97696	0.229483	0.996862	0.969355	0.879281	0.21759	2.80693	0.0113744
	LPE 20:2	1.11751	0.50844	1.77733	0.196559	1.07084	0.652952	1.02446	0.929854	2.26176	0.0274641
	LPE 20:4	1.28983	0.131669	2.27256	0.16554	1.13152	0.251172	0.901563	0.380941	2.99477	0.0212288
	LPE 22:1	1.17758	0.256714	1.7891	0.178364	1.17192	0.501448	1.30727	0.650714	2.26686	0.0206323
	LPE 22:3	1.07186	0.498559	1.77784	0.193038	1.02355	0.83713	0.847034	0.111982	1.90331	0.0258709
	LPE 22:5	1.12559	0.159746	1.73621	0.175467	1.07899	0.33024	0.865234	0.141422	1.95278	0.0158837
	NAE 17:1	1.06038	0.764139	1.54973	0.337769	0.80201	0.4091	0.673405	0.111524	2.26984	0.0240076
	NAE 18:0	1.02289	0.920842	1.33296	0.095372	1.10213	0.443239	1.0853	0.586749	1.30921	0.0216106
	PC 40:1	1.03112	0.792326	1.04983	0.540296	1.07149	0.462824	0.993768	0.954509	1.15931	0.0466361
	PC 54:8	1.32573	0.446017	1.1003	0.777711	1.70739	0.105007	0.717042	0.362596	1.86097	0.0489862
	PC O-34:0	1.06974	0.104995	1.03072	0.726731	1.04851	0.170102	0.97337	0.395886	1.07312	0.0401601
	PC O-38:0	1.06496	0.427451	0.955681	0.836287	1.01727	0.71987	0.919207	0.287338	1.07195	0.00796134
	PE 34:4|PE 16:1_18:3	0.810287	0.534665	3.30261	0.308179	1.517	0.0586596	1.68713	0.300697	2.18303	0.0384825
	SM 32:2;2O	0.947032	0.772003	0.935492	0.805587	1.08692	0.33749	1.02706	0.801903	1.18823	0.0221379
	SM 41:1;2O	1.07608	0.494287	0.891554	0.710547	1.17825	0.123806	1.09738	0.405621	1.21895	0.030609
	TG 64:16|TG 20:4_22:6_22:6	2.76644	0.311031	1.28812	0.558974	1.82087	0.315292	2.06966	0.364249	2.43	0.00376131
↓	Cer 43:2;3O|Cer 18:1;2O/25:1;O	0.965543	0.844731	1.301	0.483578	0.872151	0.406392	0.910948	0.639819	0.672772	0.027038
	FA 13:0	1.03198	0.831631	1.13727	0.15034	1.06958	0.506156	0.851367	0.204945	0.7366	0.001715
	FA 17:1	0.921222	0.69825	0.993102	0.946675	1.04367	0.741155	0.848788	0.150348	0.661915	0.00356331
	HexCer 42:2;3O|HexCer 18:1;2O/24:1;O	1.00959	0.963463	1.41987	0.353452	0.905135	0.276692	0.999109	0.994827	0.796732	0.0412168
	HexCer 42:3;3O|HexCer 18:1;2O/24:2;O	1.04418	0.792458	1.23719	0.326759	0.953757	0.248529	1.05336	0.555987	0.910479	0.0266749
	LPC 16:1	0.881438	0.504947	1.1347	0.33965	1.20764	0.101771	0.793094	0.0655568	0.602562	0.0043135
	PC 28:6	0.741434	0.184295	1.14881	0.394873	1.05403	0.785303	0.65852	0.167227	0.586558	0.043747
	PC 36:1	0.989278	0.927135	1.10483	0.44307	0.956806	0.262098	1.08279	0.342837	0.906249	0.00874399
	PC O-36:3	0.979876	0.845892	1.03478	0.779115	0.928179	0.0516939	0.998348	0.975942	0.851372	0.0216065
	PC O-41:11	0.827513	0.170081	0.999887	0.999419	0.93849	0.457393	1.06183	0.569795	0.829747	0.0249152
	PE 21:1	0.840138	0.312577	1.0325	0.821258	1.03991	0.834038	0.672392	0.136721	0.48436	0.00977645
	PE 21:3	0.921656	0.697449	1.25018	0.130985	1.24668	0.136193	0.76151	0.101526	0.547547	0.0158357
	PE 34:3|PE 16:1_18:2	0.830906	0.0529687	0.574205	0.163272	0.905655	0.237548	0.927814	0.286067	0.832199	0.0464963
	PE 42:7|PE 20:1_22:6	0.935784	0.119396	0.646068	0.142055	0.931023	0.130938	1.07043	0.319545	0.835789	0.0041794
	PE P-35:2|PE P-17:1_18:1	1.07012	0.756658	0.934246	0.267972	0.898113	0.0932063	1.10248	0.41928	0.893502	0.0205175
	PE P-36:2|PE P-18:1_18:1	0.977114	0.880697	0.957248	0.591859	0.89791	0.113145	1.1171	0.411954	0.851952	0.0124028
	PE P-44:7|PE P-22:1_22:6	0.909255	0.0726527	0.97793	0.79084	0.927599	0.222433	1.0194	0.778818	0.861489	0.00999381
	PI 38:6|PI 16:0_22:6	0.926002	0.0585869	0.604484	0.17017	0.947746	0.191939	0.88849	0.0701541	0.88361	0.0494353
	PS 36:2|PS 18:1_18:1	0.897312	0.182753	0.46095	0.127792	0.922123	0.110811	1.06348	0.419276	0.780923	0.00820422

## Sheet: BST
Supplementary Table 28. Statistics of differential lipids only in Ref group in BST.
FC: fold change, the ratio of metabolite level in each period pf fasting to that of Ctrl.
“↑”：Lipid that incresed after short-term fasting and 24-h refeeding.
“↓”：Lipid that decreased after short-term fasting and 24-h refeeding.
	Lipid	F-3h vs. Ctrl		F-6h vs. Ctrl		F-12h vs. Ctrl		F-24h vs. Ctrl		Ref vs. Ctrl
		FC(F-3h/Ctrl)	p value	FC(F-6h/Ctrl)	p value	FC(F-12h/Ctrl)	p value	FC(F-24h/Ctrl)	p value	FC(Ref/Ctrl)	p value
↑	CL 74:9|CL 18:1_18:2_18:2_20:4	1.00906	0.910498	1.10279	0.152302	1.00997	0.893497	1.01654	0.844154	1.29133	0.042331
	CL 78:13|CL 18:1_18:2_20:4_22:6	0.999231	0.992421	1.05869	0.423422	0.980929	0.816735	0.968372	0.692495	1.25339	0.0381885
	DG 27:5	1.00354	0.98168	0.91514	0.48191	1.42975	0.272283	0.975338	0.814016	1.52414	0.00787918
	DG 36:1|DG 18:0_18:1	1.34366	0.293661	0.87148	0.564381	1.16024	0.499828	0.963306	0.850222	1.57498	0.0240357
	DG 37:3|DG 19:1_18:2	2.77107	0.180661	0.646909	0.703061	2.73229	0.165631	1.54427	0.518292	3.23619	0.0102318
	DG 38:2|DG 18:1_20:1	1.3294	0.297557	0.793151	0.365893	1.20729	0.401598	0.953231	0.829854	1.5602	0.0396949
	DG 38:3|DG 20:1_18:2	1.38365	0.0972119	0.966132	0.82526	1.18045	0.251517	1.02999	0.82672	1.38393	0.0166184
	DG 40:2|DG 18:1_22:1	1.17899	0.404862	0.818978	0.266701	1.15754	0.384604	0.982111	0.908851	1.3797	0.0445892
	DG 40:4|DG 18:0_22:4	1.29573	0.278621	0.927706	0.736772	1.19006	0.435508	0.9816	0.919889	1.4936	0.0221817
	DG 40:4|DG 20:0_20:4	1.29645	0.275426	0.931118	0.752592	1.18624	0.446705	0.977118	0.900826	1.49097	0.0232159
	FA 15:4	1.14584	0.283251	0.903342	0.417922	0.984482	0.896275	1.04573	0.69246	1.25644	0.0467081
	FA 19:0	1.09346	0.631668	1.04279	0.69727	0.960976	0.732938	1.08777	0.472012	1.36422	0.0160405
	FA 20:0	1.0453	0.830631	1.06758	0.638706	0.941979	0.664008	1.11477	0.426939	1.3357	0.042449
	FA 20:1	1.14504	0.622488	1.03871	0.847621	1.06506	0.730788	1.15763	0.374153	1.44908	0.0476341
	FA 22:0	1.08387	0.762204	1.05284	0.785859	0.939406	0.704769	1.13499	0.520193	1.4914	0.0198992
	FA 22:1	1.05868	0.802434	1.08619	0.643571	1.0174	0.911567	1.10363	0.4923	1.51655	0.027965
	FA 22:2	1.31565	0.265865	1.0712	0.713006	1.1771	0.329708	1.32061	0.0908672	1.42094	0.0399395
	FA 22:3	1.18796	0.44431	0.9309	0.650574	0.997953	0.986636	1.10132	0.511109	1.41805	0.00695194
	FA 24:1	0.999552	0.997748	1.01596	0.91086	1.00747	0.93542	1.09255	0.333456	1.3309	0.0187559
	FA 24:2	0.965576	0.867489	1.06472	0.63491	1.04314	0.738166	1.12517	0.323151	1.40621	0.010257
	FA 26:1	1.18315	0.555545	1.15044	0.501542	1.04586	0.793252	1.24846	0.252127	1.50474	0.0356098
	LPC 18:2	1.00515	0.978576	0.967753	0.801902	1.76683	0.311494	1.28652	0.111367	1.48273	0.0225226
	LPE 16:1	1.0714	0.693082	0.905806	0.254674	1.06638	0.600646	0.972455	0.749638	1.5235	0.00250222
	LPE 18:1	1.24158	0.358274	0.896339	0.305801	1.02736	0.772738	0.883085	0.279427	2.54255	0.000935998
	LPE 20:2	1.16197	0.477255	0.967419	0.653037	1.12183	0.197723	0.866458	0.19445	2.0727	0.000144609
	LPE 20:4	1.18697	0.464211	0.93788	0.584136	0.978746	0.852746	0.894615	0.466073	2.79799	0.00104477
	LPE 22:1	1.14237	0.579177	0.948316	0.57994	1.07115	0.578699	0.820049	0.108232	1.90187	0.000926005
	LPE 22:3	0.972715	0.859096	0.85573	0.262147	0.901543	0.327076	0.86281	0.241	1.56716	0.00234694
	LPE 22:5	1.09719	0.555247	0.901266	0.368247	0.962774	0.729542	0.879893	0.356482	1.99049	0.00247038
	LPE 22:6	1.26443	0.331934	0.942302	0.696264	1.04992	0.78676	1.03747	0.853207	2.77769	0.0024813
	LPG 22:6	1.13789	0.491127	1.09417	0.605876	0.816275	0.425214	0.898699	0.469609	1.45495	0.0470577
	MG 18:1	1.08191	0.813171	1.07299	0.791253	1.0897	0.718013	1.05704	0.797863	1.78313	0.0368994
	NAE 16:1	1.08394	0.599313	0.965453	0.837305	1.15418	0.334624	1.30886	0.236533	1.50874	0.0138642
	NAE 17:1	1.4437	0.141526	0.934171	0.782921	1.12785	0.732893	2.5911	0.403726	2.96331	0.00111152
	PC 52:4	0.942114	0.597463	1.04488	0.662479	0.923594	0.526542	0.923619	0.629522	1.68176	0.0481813
	PC 56:9	1.24372	0.618827	1.05988	0.899742	1.37626	0.470416	1.2789	0.596621	3.09045	0.0396988
	PC 58:7	1.07794	0.347482	0.989834	0.885237	1.00472	0.950525	0.972917	0.779614	1.28026	0.0358473
	PC 58:8	1.00038	0.997359	1.00396	0.973967	0.884966	0.585197	0.909951	0.576067	1.68043	0.0370071
	PE 34:4|PE 16:1_18:3	2.09872	0.175709	1.32626	0.564533	1.4263	0.332019	1.40063	0.600774	2.13146	0.00565444
↓	PC O-41:9	0.917534	0.612475	0.745142	0.136237	0.824025	0.313176	0.953304	0.842292	0.527655	0.0185011
	PE 42:7|PE 20:1_22:6	0.981264	0.828384	0.995976	0.95392	0.959261	0.396195	1.01078	0.859068	0.785483	0.0226298
	PS 35:1|PS 17:0_18:1	0.95576	0.655917	0.951595	0.313722	1.06282	0.361158	0.98536	0.451756	0.838245	0.00365975
	PS 38:4|PS 18:0_20:4	0.982877	0.522438	1.02127	0.423201	0.963674	0.339975	1.01294	0.536862	0.932758	0.0337076

## Sheet: HYT
Supplementary Table 29. Statistics of differential lipids only in Ref group in HYT.
FC: fold change, the ratio of metabolite level in each period pf fasting to that of Ctrl.
“↑”：Lipid that incresed after short-term fasting and 24-h refeeding.
“↓”：Lipid that decreased after short-term fasting and 24-h refeeding.
	Lipid	F-3h vs. Ctrl		F-6h vs. Ctrl		F-12h vs. Ctrl		F-24h vs. Ctrl		Ref vs. Ctrl
		FC(F-3h/Ctrl)	p value	FC(F-6h/Ctrl)	p value	FC(F-12h/Ctrl)	p value	FC(F-24h/Ctrl)	p value	FC(Ref/Ctrl)	p value
↑	CL 74:11|CL 36:5_38:6	0.970768	0.682782	0.521894	0.166346	0.989924	0.897406	1.15125	0.0889479	1.16828	0.0111695
	DG 37:4|DG 17:0_20:4	1.72008	0.136856	1.25861	0.272441	1.33162	0.264498	1.46099	0.202636	1.59642	0.0393226
	FA 15:4	1.08818	0.574837	1.06176	0.419673	1.03753	0.717155	0.9653	0.764612	1.2623	0.0287215
	LPC 18:2	0.971239	0.807262	1.32495	0.23722	0.896139	0.524007	0.855923	0.106807	1.37105	0.000526691
	LPE 16:0	1.12991	0.0974882	1.13989	0.162341	1.01189	0.82755	1.05459	0.109006	1.37336	7.18799e-06
	LPE 16:1	1.06657	0.664607	1.65029	0.173417	1.14571	0.158703	0.972042	0.762732	1.41899	0.0016194
	LPE 20:2	1.05516	0.758144	1.9514	0.194807	1.32216	0.163345	0.878865	0.361295	1.77027	0.0365436
	LPE 22:1	1.1151	0.389084	2.21974	0.152449	1.33146	0.0514162	1.04913	0.52499	1.79549	0.000656977
	LPE 22:3	1.09475	0.530294	2.47478	0.151629	1.18799	0.152039	0.96835	0.720378	1.47246	0.00237512
	LPE 22:4	1.09063	0.491595	2.01913	0.104311	1.37975	0.222377	0.932204	0.628066	1.41758	0.0140639
	LPE 22:5	1.31119	0.232186	3.03829	0.143782	1.16675	0.224927	1.02715	0.764567	2.54359	2.56318e-06
	LPE O-16:2	1.06819	0.419481	0.981551	0.835194	1.03525	0.754967	1.09577	0.317192	1.25349	0.00627328
	NAE 17:1	1.28611	0.450991	1.58775	0.240243	0.962115	0.835881	0.922059	0.689088	2.05948	0.00114797
	PC 31:0	1.29812	0.292202	1.03192	0.559895	1.05502	0.503702	1.07463	0.284636	1.1598	0.0263676
	PC 36:4|PC 16:0_20:4	1.02299	0.503764	1.06824	0.221914	0.953805	0.211005	0.989042	0.642273	1.05121	0.0323562
	PC 36:6|PC 14:0_22:6	1.29789	0.13172	0.927063	0.393785	0.98469	0.884904	1.12301	0.243266	1.19364	0.0275522
	PC 37:4|PC 17:0_20:4	1.30068	0.19648	1.11689	0.285084	1.03419	0.720701	1.11037	0.181922	1.17262	0.0490936
	PC 38:7	1.19852	0.285949	1.02331	0.64706	0.876061	0.166137	0.967561	0.64411	1.14668	0.0106956
	PC 39:7	1.35973	0.295632	1.17138	0.132629	1.01154	0.919407	1.13006	0.231033	1.16122	0.0454237
	PC 42:10|PC 20:4_22:6	1.10894	0.364731	0.987986	0.753599	0.938849	0.353247	1.07131	0.329107	1.1728	0.00164793
	PC 42:9	1.17324	0.228176	1.14853	0.211829	0.996895	0.977141	1.17324	0.130023	1.22916	0.00291233
	PC O-32:1	1.17195	0.276095	1.0166	0.633187	0.921689	0.22332	0.951801	0.233282	1.07789	0.0471223
	PC O-38:0	1.14045	0.104424	0.718574	0.0601449	0.929467	0.546127	1.01825	0.833483	1.25479	0.00157363
	PE 36:4|PE 16:0_20:4	1.09055	0.207055	0.974964	0.352698	0.937383	0.147197	0.974718	0.399485	1.09599	0.0143642
	PE 36:4|PE 18:2_18:2	1.08919	0.204932	0.97782	0.458974	0.935592	0.166693	0.979511	0.490034	1.09401	0.0202241
	PE 36:6|PE 14:0_22:6	1.27822	0.157934	1.26189	0.177619	0.941659	0.608775	0.959556	0.485486	1.18004	0.00692778
	PE 37:4|PE 17:0_20:4	1.22113	0.309139	1.08207	0.219497	0.968786	0.578584	1.06296	0.169528	1.16891	0.00137424
	PE 39:6|PE 17:0_22:6	1.29864	0.251089	0.998891	0.983976	1.04567	0.598816	1.0713	0.314246	1.14027	0.0219774
	PE 40:6|PE 18:0_22:6	1.09565	0.322036	1.02864	0.29934	0.943948	0.310521	1.02231	0.655714	1.09725	0.00372739
	PE O-36:4|PE O-16:0_20:4	1.06083	0.216174	0.978335	0.66446	1.02105	0.643547	1.06716	0.332021	1.13596	0.00452373
	PE O-36:6|PE O-16:1_20:5	1.28959	0.0887467	1.0776	0.598966	1.0872	0.293162	1.03427	0.708108	1.32754	0.0340192
	PE O-37:6|PE O-17:2_20:4	1.14463	0.237225	1.07408	0.330741	1.01799	0.72287	1.03931	0.509539	1.10083	0.0374509
	PE O-38:4|PE O-18:2_20:2	1.07264	0.26723	0.889612	0.172234	0.980441	0.814707	1.06065	0.447595	1.10802	0.0465371
	PEtOH 40:2|PEtOH 20:1_20:1	1.05622	0.261498	1.04603	0.341237	1.02895	0.651799	1.04127	0.600587	1.11594	0.0201971
	PG 34:1|PG 16:0_18:1	1.37275	0.216097	0.638738	0.0857288	0.969601	0.67062	0.934666	0.479322	1.25121	0.00874669
	PG 36:2|PG 18:1_18:1-1	1.29308	0.277871	0.672073	0.112505	1.02035	0.648138	1.07383	0.519954	1.26044	2.98682e-05
	SM 34:0;3O	1.23429	0.193674	0.803196	0.179826	1.06995	0.410114	1.13613	0.21132	1.2183	0.0461249
	ST 27:1;O	1.36255	0.234708	2.20303	0.154148	0.975316	0.747459	0.976357	0.808449	1.35791	0.00101501
	TG 60:6|TG 18:1_18:1_24:4	1.48471	0.107701	1.12698	0.588655	1.02793	0.838616	1.29415	0.185558	1.79643	0.0025391
↓	TG 46:3|TG 12:0_16:1_18:2	4.28777	0.389236	0.705228	0.58883	0.691374	0.507685	0.666719	0.35589	0.250675	0.039004
	TG 43:0|TG 12:0_15:0_16:0	1.15235	0.835506	4.93974	0.269897	0.639124	0.320458	0.580713	0.232379	0.381306	0.0263702
	FA 18:3	0.759997	0.435559	0.571446	0.0974414	1.31691	0.403717	1.02294	0.916714	0.391269	0.0278088
	LPC 16:1	0.979346	0.929905	0.936278	0.780609	1.34075	0.378821	0.868937	0.447979	0.410266	0.0075406
	PC 28:6	1.1029	0.32312	1.16689	0.407203	1.50244	0.225535	0.990523	0.924612	0.721316	0.00389689
	PE 21:3	1.03843	0.866981	1.05272	0.780194	1.3861	0.380546	0.856791	0.419549	0.415866	0.00920648
	PE 23:4	0.95002	0.805392	1.07101	0.681558	1.3765	0.326832	0.765526	0.144905	0.422034	0.00459554
	PE 37:5;2O|PE 20:4_17:1;2O	0.871611	0.145948	1.82488	0.167169	1.11151	0.0502792	1.502	0.289783	0.9109	0.0408679
	PE 38:7|PE 16:1_22:6	1.0154	0.834881	0.859154	0.0797193	0.925333	0.077202	0.977946	0.596497	0.928303	0.0142106
	PE 38:8	0.769257	0.122324	0.502402	0.0843612	0.841301	0.127406	0.923193	0.493917	0.790808	0.0348731
	PE 40:10|PE 20:5_20:5	1.00787	0.861111	0.886316	0.320537	0.981681	0.857962	1.10293	0.0503435	0.913162	0.04118
	PE 40:7|PE 18:1_22:6	0.876301	0.147924	0.795937	0.128235	0.939558	0.287982	1.00826	0.887359	0.784413	0.000192666
	PE 44:10|PE 22:4_22:6	0.79898	0.342871	0.661571	0.2133	0.957938	0.762381	1.12009	0.291838	0.77254	0.0308784
	PE 44:12|PE 22:6_22:6	0.777231	0.136655	0.583887	0.184212	0.934182	0.291159	0.978767	0.730323	0.872095	0.0177457
	PE P-42:7|PE P-18:1_24:6	0.985658	0.754322	1.01455	0.798899	0.976258	0.657888	0.923741	0.124573	0.894648	0.0387731
	PE P-42:7|PE P-20:1_22:6	0.981386	0.62396	1.01476	0.778173	0.968447	0.444867	0.924418	0.086042	0.906673	0.046915
	PS 32:1|PS 16:0_16:1	0.774623	0.441377	0.722684	0.212175	0.936461	0.792965	0.795155	0.201125	0.580492	0.0302971
	PS 36:2|PS 18:1_18:1	0.727143	0.160863	0.542568	0.156345	0.956347	0.312549	1.0475	0.319311	0.741028	0.000414756
	PS 38:2|PS 18:1_20:1	0.831797	0.177454	0.777957	0.245503	1.02575	0.466201	0.996153	0.893783	0.757967	0.000454213
	PS 40:6|PS 18:0_22:6	0.761132	0.193578	0.527261	0.162297	0.954175	0.332195	1.01499	0.721707	0.839528	0.00448729
	PS 41:6|PS 19:0_22:6	0.687699	0.115505	0.552503	0.133031	0.947014	0.425412	1.047	0.535211	0.78552	0.00804553

## Sheet: COR
Supplementary Table 30. Statistics of differential lipids only in Ref group in COR.
FC: fold change, the ratio of metabolite level in each period pf fasting to that of Ctrl.
“↑”：Lipid that incresed after short-term fasting and 24-h refeeding.
“↓”：Lipid that decreased after short-term fasting and 24-h refeeding.
	Lipid	F-3h vs. Ctrl		F-6h vs. Ctrl		F-12h vs. Ctrl		F-24h vs. Ctrl		Ref vs. Ctrl
		FC(F-3h/Ctrl)	p value	FC(F-6h/Ctrl)	p value	FC(F-12h/Ctrl)	p value	FC(F-24h/Ctrl)	p value	FC(Ref/Ctrl)	p value
↑	HexCer 32:1;2O|HexCer 18:1;2O/14:0	2.24115	0.19959	3.80408	0.0660914	1.9685	0.205318	1.40907	0.150594	2.5294	0.03759
	HexCer 36:2;2O|HexCer 18:2;2O/18:0	1.3888	0.490463	1.43655	0.392876	1.25996	0.484248	1.12612	0.493037	1.88122	0.0382395
	HexCer 42:1;3O|HexCer 18:1;2O/24:0;O	1.33719	0.36633	1.19365	0.269326	1.25912	0.275518	1.31238	0.210408	1.52908	0.0449774
	HexCer 42:2;2O|HexCer 18:1;2O/24:1	1.63814	0.251367	1.3124	0.151004	1.36728	0.23857	1.32618	0.240726	2.00545	0.0250968
	HexCer 42:2;3O|HexCer 18:1;2O/24:1;O	1.39408	0.271597	1.18424	0.341017	1.17403	0.443849	1.27088	0.260636	1.56536	0.0326729
	HexCer 43:2;2O|HexCer 18:1;2O/25:1	1.3309	0.373478	1.20873	0.326392	1.14921	0.547185	1.14487	0.533929	1.65132	0.0224281
	HexCer 44:2;2O|HexCer 18:1;2O/26:1	1.65133	0.353295	1.28663	0.261394	1.38797	0.225253	1.31922	0.340172	1.9247	0.0421869
	PC 35:0	1.33532	0.0622784	1.13865	0.0985066	1.12492	0.277121	1.13428	0.144629	1.33713	0.0210438
	PC 35:1	1.17493	0.238311	1.14647	0.0646085	1.04432	0.353358	1.06185	0.178716	1.13459	0.00934753
	PC O-33:0	1.49583	0.149436	1.28285	0.0518039	1.27322	0.0967242	1.35627	0.146085	1.51542	0.0293324
	PC O-40:7	1.08874	0.150041	1.19886	0.0675939	1.01761	0.209115	0.976548	0.40634	1.09077	0.00360272
	PE 36:1|PE 18:0_18:1	0.994377	0.956413	0.910305	0.351247	1.1115	0.0782372	1.07528	0.222977	1.15342	0.0257202
	PE 38:2|PE 18:1_20:1	1.28147	0.304267	1.02386	0.807763	1.08696	0.237708	1.0507	0.658986	1.3579	0.023581
	PE O-42:2|PE O-18:1_24:1	1.09773	0.70193	0.674032	0.0517165	1.43395	0.0580202	1.46813	0.0749179	1.84598	0.0113407
	PE P-32:1|PE P-18:1_14:0	0.940009	0.879059	1.41118	0.535188	1.17298	0.655728	1.21177	0.510989	2.71092	0.00366165
	PE P-34:1|PE P-18:1_16:0	1.09825	0.67131	1.02245	0.875676	1.15441	0.148611	1.16202	0.127668	1.34396	0.0185582
	PE P-34:2|PE P-16:0_18:2	1.26543	0.42823	1.0952	0.625561	1.19964	0.267706	1.19294	0.282178	1.37909	0.0498146
	PE P-35:1|PE P-17:0_18:1	1.49205	0.165722	0.998458	0.990322	1.18839	0.194584	1.21265	0.173147	1.50334	0.0214798
	PE P-35:2|PE P-17:1_18:1	2.22222	0.239576	1.23113	0.530297	1.53495	0.134871	1.49979	0.223744	2.3325	0.00949621
	PE P-36:1|PE P-18:0_18:1	1.36472	0.292658	0.984794	0.91078	1.18173	0.340126	1.16063	0.379833	1.50089	0.049634
	PE P-37:1|PE P-17:0_20:1	1.38236	0.276989	0.941266	0.635895	1.21498	0.201839	1.28457	0.115984	1.65145	0.0277265
	PE P-37:2|PE P-18:1_19:1	1.91128	0.176242	1.13945	0.420051	1.2755	0.255618	1.30793	0.251779	1.89463	0.0254395
	PE P-38:1|PE P-18:0_20:1	1.42118	0.348193	0.973028	0.866022	1.26587	0.220946	1.32788	0.157297	1.7799	0.0224028
	PE P-38:2|PE P-18:1_20:1	1.68872	0.261598	1.13328	0.48582	1.22308	0.432865	1.27186	0.3503	1.75433	0.0445613
	PE P-39:2|PE P-18:1_21:1	1.72119	0.205449	1.13588	0.39327	1.1714	0.5117	1.40664	0.154162	1.93489	0.0156169
	PE P-40:2|PE P-18:1_22:1	1.59153	0.23601	1.07206	0.65896	1.19368	0.426923	1.28084	0.269529	1.75596	0.0453344
	PE P-42:2|PE P-18:1_24:1	1.86839	0.313213	0.94895	0.813943	1.29937	0.289866	1.3966	0.184006	2.15354	0.0290168
	PS 38:2|PS 18:1_20:1	0.960451	0.79016	0.9994	0.996699	1.16914	0.180349	1.22396	0.169322	1.29904	0.0339715
	SM 43:2;2O	1.21493	0.280491	1.19539	0.195532	1.19013	0.393984	1.23641	0.214838	1.53318	0.0437867
	SM 43:2;2O|SM 18:2;2O/25:0	1.26429	0.305865	1.2124	0.17995	1.25423	0.281846	1.30631	0.160161	1.58604	0.0338383
↓	SM 42:4;2O	0.719491	0.253121	0.891858	0.618896	0.684471	0.382138	0.649557	0.14054	0.483731	0.0183791
	TG 68:3|TG 18:1_18:1_32:1	1.75937	0.209867	0.788677	0.658871	0.589684	0.197038	0.724426	0.503001	0.267082	0.022823
	TG 47:1|TG 15:0_16:0_16:1	0.713655	0.433058	1.05492	0.912166	0.309544	0.0630327	15.3286	0.373432	0.152882	0.0258563
	DG 34:2|DG 16:0_18:2	0.925596	0.713347	0.723716	0.306773	1.03091	0.906784	1.30263	0.24645	0.526324	0.0204834
	FA 19:0	1.05875	0.64232	1.22	0.0903905	0.883128	0.0994395	1.05984	0.367935	0.848669	0.0296575
	LPE 17:0	1.05246	0.620019	1.0232	0.695981	0.980542	0.705884	1.00107	0.986699	0.878317	0.0410229
	LPE O-20:2	0.992022	0.871177	1.11775	0.363945	0.90568	0.160068	0.961785	0.692536	0.755346	0.0454757

## Sheet: HIP
Supplementary Table 31. Statistics of differential lipids only in Ref group in HIP.
FC: fold change, the ratio of metabolite level in each period pf fasting to that of Ctrl.
“↑”：Lipid that incresed after short-term fasting and 24-h refeeding.
“↓”：Lipid that decreased after short-term fasting and 24-h refeeding.
	Lipid	F-3h vs. Ctrl		F-6h vs. Ctrl		F-12h vs. Ctrl		F-24h vs. Ctrl		Ref vs. Ctrl
		FC(F-3h/Ctrl)	p value	FC(F-6h/Ctrl)	p value	FC(F-12h/Ctrl)	p value	FC(F-24h/Ctrl)	p value	FC(Ref/Ctrl)	p value
↑	DG 36:4|DG 16:0_20:4	1.15948	0.289891	1.49067	0.0624637	0.983092	0.842339	0.874599	0.148156	1.43748	0.00335272
	HexCer 42:3;3O|HexCer 18:1;2O/24:2;O	1.17354	0.266764	1.38039	0.0969721	1.04477	0.373904	1.00021	0.998005	1.17791	0.0183799
	TG 51:5|TG 15:0_18:2_18:3	1.58806	0.405581	1.66005	0.471484	7.16598	0.0600759	9.54974	0.293827	6.15786	0.0384924
	TG 60:14|TG 18:3_20:5_22:6	2.50851	0.177349	4.39353	0.090934	1.45899	0.423938	2.18955	0.204571	2.83158	0.0403994
	TG 62:2|TG 26:0_18:1_18:1	2.54295	0.0720104	2.05693	0.301037	1.87064	0.0742877	1.96856	0.123516	3.30871	0.044328
↓	TG 62:14|TG 18:2_22:6_22:6	0.694652	0.180457	0.903939	0.739506	0.772411	0.106375	0.792221	0.345517	0.358535	0.0146193
	Cer 37:1;2O|Cer 18:1;2O/19:0	1.21643	0.292825	1.15681	0.0843494	1.1475	0.242531	0.952353	0.54898	0.800639	0.0254538
	Cer 41:1;2O|Cer 18:1;2O/23:0	1.05673	0.608282	1.0975	0.320656	1.04344	0.575953	0.917536	0.373871	0.782911	0.0379567
	FA 17:1	1.02398	0.871151	0.863487	0.158207	1.46037	0.0647097	1.07299	0.684173	0.727853	0.0152435
	PE 21:1	1.00997	0.951348	0.846995	0.407682	1.61211	0.256273	0.64819	0.050469	0.607707	0.0166513

## Sheet: OB
Supplementary Table 32. Statistics of differential lipids only in Ref group in OB.
FC: fold change, the ratio of metabolite level in each period pf fasting to that of Ctrl.
“↑”：Lipid that incresed after short-term fasting and 24-h refeeding.
“↓”：Lipid that decreased after short-term fasting and 24-h refeeding.
	Lipid	F-3h vs. Ctrl		F-6h vs. Ctrl		F-12h vs. Ctrl		F-24h vs. Ctrl		Ref vs. Ctrl
		FC(F-3h/Ctrl)	p value	FC(F-6h/Ctrl)	p value	FC(F-12h/Ctrl)	p value	FC(F-24h/Ctrl)	p value	FC(Ref/Ctrl)	p value
↑	Cer 36:1;2O|Cer 18:1;2O/18:0	1.1736	0.152686	1.44738	0.124724	1.15816	0.157161	1.13854	0.0791162	1.19815	0.0451519
	PC O-41:11	1.02395	0.794066	1.01486	0.9075	1.14526	0.137626	1.21147	0.0859855	1.19189	0.049338
	PE P-32:0|PE P-16:0_16:0	1.29224	0.114875	0.938855	0.804285	1.29132	0.178291	1.19375	0.232998	1.4341	0.0324628
	PI 40:4	1.22595	0.18572	0.566931	0.254911	1.25731	0.146711	1.36235	0.0791868	1.46803	0.0152138
	SM 36:0;2O	1.19966	0.161722	0.876917	0.496595	1.26203	0.152963	1.28197	0.056294	1.33639	0.0362768
	SM 38:1;2O|SM 18:1;2O/20:0	1.16423	0.271595	0.773264	0.321843	1.22751	0.218229	1.25723	0.181076	1.37445	0.0331067
↓	CAR 14:0	1.11403	0.559964	0.997532	0.989884	0.895543	0.19488	0.978757	0.809381	0.709554	0.0380927
	CAR 16:0	1.18368	0.593996	0.99016	0.959172	1.20694	0.330879	1.13778	0.44198	0.615071	0.0424205
	CAR 16:1	0.996234	0.98737	1.36946	0.215394	0.90778	0.528396	0.867069	0.3216	0.598841	0.0158201
	CAR 18:1	1.16019	0.613712	1.13547	0.526234	1.10237	0.612654	1.04803	0.77891	0.622382	0.042034
	Cer 38:7;4O	0.882523	0.700671	0.576215	0.224937	0.608705	0.106824	0.560557	0.0513349	0.531314	0.0442282
	FA 20:4	0.873279	0.254129	1.0656	0.664188	0.832928	0.075422	0.873184	0.171314	0.77383	0.0207413
	FA 20:5	1.044	0.570386	1.16392	0.313021	0.970127	0.663375	1.08268	0.338208	0.870746	0.0215483
	HexCer 41:2;2O|HexCer 18:1;2O/23:1	0.835466	0.201984	1.25596	0.420861	0.833415	0.245799	0.769146	0.170207	0.698546	0.0425795
	HexCer 42:2;2O|HexCer 18:1;2O/24:1	0.837188	0.0704708	1.19064	0.368594	0.856162	0.126043	0.906758	0.467701	0.749918	0.00178651
	LPC 22:0	0.964848	0.759471	1.0439	0.60105	0.877891	0.298988	0.871118	0.127223	0.701352	0.0086007
	LPC 22:1	0.768939	0.114736	1.29483	0.244983	0.751382	0.141172	0.757482	0.0940533	0.616292	0.0204253
	LPC 24:0	0.856493	0.234329	0.685002	0.188757	0.834061	0.247343	0.808319	0.194809	0.65892	0.028425
	LPC 26:0	0.725714	0.236971	0.967019	0.835912	0.989402	0.904264	1.01603	0.88168	0.651984	0.00531137
	LPC 26:1	0.683221	0.105027	0.847948	0.546383	0.678387	0.126182	0.60744	0.0852406	0.509841	0.018219
	LPE O-18:2	0.89709	0.435921	0.928202	0.527821	0.840429	0.161756	0.892049	0.399245	0.725439	0.0317736
	LPE O-20:2	0.813542	0.149094	4.19468	0.370935	0.825951	0.16756	0.838577	0.198933	0.632637	0.0132773
	NAE 19:0	1.17778	0.319679	1.44978	0.256723	1.19483	0.0791599	1.0847	0.324875	0.747502	0.019818
	NAE 21:1	1.04123	0.696941	1.10378	0.464519	0.959844	0.583695	0.899634	0.24921	0.746358	0.000284469
	NAE 24:0	0.517406	0.109289	0.978188	0.912595	0.980105	0.915196	1.25713	0.502234	0.336543	0.0337808
	PC 35:0	0.997434	0.960966	1.07422	0.426818	0.930327	0.35833	0.955415	0.685034	0.867114	0.0305065
	PC 37:0|PC 16:0_21:0	0.910742	0.264835	0.936967	0.246963	0.842398	0.109546	0.868022	0.213447	0.798759	0.000401998
	PC 37:1	0.944828	0.493706	1.12033	0.471672	0.847267	0.138551	0.862913	0.281532	0.776039	0.00973052
	PC 38:1	0.930606	0.346212	1.12801	0.354089	0.851363	0.118944	0.820509	0.116126	0.784746	0.00811959
	PC 39:1|PC 21:0_18:1	0.861909	0.165324	1.07233	0.63605	0.801986	0.10779	0.802702	0.171213	0.711193	0.00479746
	PC 40:1	0.805406	0.102125	1.01434	0.919972	0.774239	0.128005	0.773719	0.206786	0.642438	0.010686
	PC 40:2|PC 20:1_20:1	0.85628	0.0834347	1.18331	0.332563	0.805305	0.0742012	0.772769	0.125363	0.72233	0.00447504
	PC 41:1	0.797462	0.118861	1.00381	0.978654	0.797389	0.11739	0.823829	0.278602	0.668419	0.0187371
	PC 41:2	0.819384	0.167978	1.02638	0.870771	0.786816	0.146552	0.800468	0.248941	0.689098	0.024372
	PC 42:1|PC 24:0_18:1	0.830022	0.115511	1.08507	0.518351	0.819967	0.155302	0.846201	0.370622	0.669265	0.0131865
	PC 42:2	0.774094	0.0593632	1.03478	0.811152	0.758418	0.0921905	0.751919	0.135454	0.660808	0.00593381
	PC 43:2	0.779452	0.126799	1.10929	0.501809	0.738778	0.0612335	0.784395	0.188831	0.618276	0.0180829
	PC 43:4	0.808295	0.232309	1.12831	0.6497	0.749502	0.101413	0.763947	0.223292	0.593218	0.00170385
	PC 44:1|PC 26:0_18:1	0.787773	0.0850798	0.981229	0.887488	0.801595	0.138831	0.822053	0.203969	0.66982	0.0215471
	PC O-34:0	1.01335	0.830712	0.894894	0.297155	0.891374	0.0837825	0.828626	0.0640465	0.862329	0.0185931
	PC O-35:0	0.957427	0.721207	1.11522	0.438703	0.940037	0.614258	0.927962	0.662674	0.752394	0.0132465
	PC O-36:1	0.951554	0.558248	1.11499	0.41512	0.830764	0.167127	0.819676	0.257252	0.703687	0.00850732
	PC O-42:2	0.841719	0.0877348	1.24417	0.143487	0.823323	0.0680565	0.773741	0.172317	0.680685	0.0461449
	PE 42:4|PE 18:0_24:4	0.960626	0.468899	0.926815	0.29954	0.932129	0.200085	0.880247	0.139513	0.854773	0.0164861
	PE O-39:5|PE O-17:1_22:4	0.907541	0.559737	0.843127	0.163087	0.803548	0.0665552	0.814406	0.0957893	0.756737	0.0358587
	PE O-39:5|PE O-19:1_20:4	0.907541	0.559737	0.843127	0.163087	0.803548	0.0665552	0.814461	0.0959326	0.756737	0.0358587
	PE P-35:1|PE P-17:0_18:1	1.06129	0.35138	0.845774	0.163601	1.00779	0.877474	1.05625	0.578014	0.884453	0.00344999
	PE P-36:1|PE P-18:0_18:1	0.958675	0.347109	0.869341	0.197985	0.960907	0.588469	0.951324	0.618667	0.84634	0.00943342
	PE P-37:1|PE P-17:0_20:1	0.960698	0.491758	0.776323	0.140556	0.970213	0.733906	1.01699	0.905017	0.820067	0.00386679
	PE P-37:2|PE P-18:1_19:1	0.95025	0.569868	0.846926	0.198806	0.938541	0.557689	0.961928	0.79127	0.766311	0.0256861
	PE P-38:1|PE P-18:0_20:1	0.950691	0.408959	0.808331	0.213648	0.988995	0.884994	1.00849	0.93782	0.86587	0.0255985
	PE P-38:2|PE P-18:1_20:1	0.895838	0.204652	0.892108	0.314679	0.913848	0.401209	0.904711	0.457614	0.767264	0.0155061
	PE P-39:2|PE P-18:1_21:1	0.935999	0.46161	0.747315	0.098576	0.905815	0.443492	0.973646	0.88092	0.730338	0.0247468
	PE P-40:2|PE P-18:1_22:1	0.953035	0.228065	0.839492	0.250425	0.944026	0.450571	0.922515	0.47524	0.833057	0.0377321
	PE P-40:4|PE P-18:0_22:4	0.946663	0.198053	0.898372	0.194577	0.933334	0.230159	0.909662	0.341998	0.839715	0.00685279
	PE P-41:2|PE P-18:1_23:1	0.929825	0.547813	0.743451	0.151781	0.915596	0.209864	0.887605	0.107235	0.78732	0.00681576
	PE P-42:4|PE P-18:0_24:4	0.926427	0.159189	0.839521	0.123142	0.895488	0.13222	0.894491	0.279468	0.829857	0.00295032
	PE P-42:6|PE P-18:0_24:6	1.0243	0.516987	0.917295	0.218449	0.945629	0.161789	0.942692	0.378839	0.939204	0.0379364
	PE P-42:6|PE P-20:0_22:6	1.02429	0.513618	0.917665	0.21902	0.945438	0.162901	0.94205	0.379006	0.938641	0.0361973
	PG 42:9|PG 20:3_22:6	0.893012	0.593223	0.787675	0.163543	0.799736	0.121123	0.780545	0.0854582	0.692812	0.0330828
	PS 42:10|PS 20:4_22:6	0.841505	0.32405	0.478459	0.0904332	0.925781	0.39405	0.968417	0.667394	0.774861	0.0275722
	PS 44:12|PS 22:6_22:6	0.889359	0.539485	0.447681	0.0916068	0.821026	0.10117	0.856926	0.164335	0.780375	0.0477109
	SM 41:2;2O|SM 18:1;2O/23:1	0.917684	0.423912	0.894878	0.364341	0.82384	0.123034	0.795571	0.113485	0.740382	0.0375431
	SM 41:2;2O|SM 18:2;2O/23:0	0.919361	0.429372	0.889395	0.339808	0.821283	0.116625	0.792838	0.108892	0.739959	0.0372062
	TG 56:10|TG 18:2_18:3_20:5	0.320811	0.0635725	0.399117	0.101168	0.423733	0.211381	0.429722	0.0986778	0.195128	0.0452013

## Sheet: CBL
Supplementary Table 33. Statistics of differential lipids only in Ref group in CBL.
FC: fold change, the ratio of metabolite level in each period pf fasting to that of Ctrl.
“↑”：Lipid that incresed after short-term fasting and 24-h refeeding.
“↓”：Lipid that decreased after short-term fasting and 24-h refeeding.
	Lipid	F-3h vs. Ctrl		F-6h vs. Ctrl		F-12h vs. Ctrl		F-24h vs. Ctrl		Ref vs. Ctrl
		FC(F-3h/Ctrl)	p value	FC(F-6h/Ctrl)	p value	FC(F-12h/Ctrl)	p value	FC(F-24h/Ctrl)	p value	FC(Ref/Ctrl)	p value
↑	CE 20:4	0.902962	0.746285	1.1794	0.707414	1.19667	0.559242	0.952812	0.722215	1.85841	0.0462841
	FA 15:4	0.956939	0.799073	1.06393	0.559452	0.870659	0.108039	0.880325	0.123428	1.16871	0.0293553
	FA 22:0	1.00302	0.985244	1.41861	0.360674	1.11496	0.493563	0.911438	0.630979	1.46553	0.0448538
	FA 22:2	1.18329	0.129218	1.2163	0.347889	1.09419	0.452647	1.07014	0.613808	1.29937	0.0366943
	FA 22:3	1.12908	0.46027	1.28871	0.41909	1.00439	0.978229	0.90212	0.512744	1.3641	0.0266256
	FA 24:1	0.978374	0.834568	1.38136	0.196869	1.08351	0.340789	1.04689	0.574439	1.36692	0.00967948
	LPC 18:2	0.952813	0.745346	1.33449	0.281591	1.13145	0.266756	1.08311	0.48425	1.67086	0.0313611
	LPC 20:4	0.95006	0.535457	1.21855	0.293589	0.944204	0.565653	0.928033	0.421781	1.24003	0.0494138
	LPE 16:0	1.05365	0.493628	1.14408	0.300812	0.964008	0.547449	0.919952	0.187848	1.33964	0.00427467
	LPE 16:1	1.18036	0.361117	1.57889	0.0505687	0.957329	0.75281	0.971711	0.809842	1.78369	0.0117497
	LPE 18:1	1.28543	0.264113	1.99508	0.14708	0.964609	0.71822	0.918639	0.285368	3.0327	0.000703268
	LPE 20:4	1.24447	0.412857	1.85314	0.143405	0.978809	0.791146	0.971619	0.768482	2.9764	0.00236748
	LPE 22:1	1.05618	0.626895	1.72312	0.121669	1.02624	0.788459	0.855598	0.0689975	1.98486	0.00295543
	LPE 22:3	0.970274	0.757537	1.76761	0.158443	0.904694	0.271669	0.880864	0.0995782	1.51788	0.00862509
	LPE 22:5	1.114	0.562049	1.56756	0.188958	0.95022	0.584649	0.925859	0.39813	2.38601	0.00159708
	LPE 22:6	1.27838	0.358792	1.81087	0.170619	0.976576	0.817203	1.03197	0.765752	2.99437	0.000924047
	NAE 17:1	1.59953	0.145307	2.17833	0.24643	1.02157	0.946561	1.04494	0.883264	3.71908	0.000665104
	PE 37:6|PE 15:0_22:6	1.24551	0.0672012	1.14001	0.454763	0.975108	0.758542	0.938421	0.676206	1.29515	0.0384099
	PE O-39:8|PE O-17:2_22:6	1.05816	0.340735	1.17419	0.157906	0.943719	0.186366	0.978604	0.555638	1.10959	0.0385678
	PE P-40:9|PE P-18:3_22:6	0.943521	0.625913	1.3386	0.297062	0.903397	0.415504	0.905039	0.466523	1.29252	0.0395588
	PG 36:2|PG 18:1_18:1-1	1.06019	0.556486	1.56641	0.174008	0.863051	0.129079	0.82439	0.0623223	1.32602	0.0438885
↓	FA 17:1	0.859407	0.0795974	0.851376	0.113772	0.893416	0.359731	0.84367	0.0654455	0.699671	0.00366963
	PE 34:3|PE 16:1_18:2	1.0243	0.843731	0.815511	0.151119	0.871255	0.243994	0.913181	0.402218	0.811682	0.0434981

## Sheet: Liver
Supplementary Table 34. Statistics of differential lipids only in Ref group in Liver.
FC: fold change, the ratio of metabolite level in each period pf fasting to that of Ctrl.
“↑”：Lipid that incresed after short-term fasting and 24-h refeeding.
“↓”：Lipid that decreased after short-term fasting and 24-h refeeding.
	Lipid	F-3h vs. Ctrl		F-6h vs. Ctrl		F-12h vs. Ctrl		F-24h vs. Ctrl		Ref vs. Ctrl
		FC(F-3h/Ctrl)	p value	FC(F-6h/Ctrl)	p value	FC(F-12h/Ctrl)	p value	FC(F-24h/Ctrl)	p value	FC(Ref/Ctrl)	p value
↑	DG 34:0|DG 16:0_18:0	1.1537	0.58253	1.33978	0.300336	1.23706	0.462071	1.88217	0.0946172	2.99984	0.000767542
	DG 35:1|DG 17:0_18:1	0.778227	0.420541	0.996291	0.990801	1.13774	0.636996	1.67014	0.099248	2.5556	0.00534449
	DG 36:0|DG 16:0_20:0	1.32006	0.4152	1.51262	0.287571	1.28729	0.522636	1.73092	0.169514	3.94261	0.000393113
	DG 36:1|DG 18:0_18:1	1.02728	0.91098	1.25955	0.38926	1.24673	0.470003	2.17317	0.0822386	3.44279	0.000348896
	DG 37:4|DG 17:0_20:4	1.19392	0.539337	1.14392	0.601091	1.04907	0.811445	1.0563	0.822375	1.64411	0.0231126
	DG 38:3|DG 20:1_18:2	0.821524	0.173764	1.02146	0.851691	0.863171	0.226128	1.19225	0.265117	2.02122	0.00170564
	DG 38:4|DG 18:1_20:3	0.906703	0.424126	1.07123	0.458112	0.881927	0.140892	0.946145	0.586256	1.52202	0.00145843
	DG 40:5|DG 18:1_22:4	0.923149	0.725719	1.44056	0.133509	1.087	0.725638	1.33855	0.286637	3.34612	0.000305163
	DG 42:6|DG 18:1_24:5	0.59616	0.218931	1.31454	0.464395	0.484135	0.112217	0.605906	0.228236	3.41923	0.000446526
	FA 17:0	0.980398	0.859414	1.03654	0.843584	0.931959	0.602721	1.16741	0.308514	1.4077	0.0200885
	FA 18:1	1.10367	0.403143	1.35734	0.0988327	1.02857	0.872644	1.33511	0.0855131	1.48479	0.00944857
	FA 20:1	1.04368	0.767505	0.984017	0.924483	0.814519	0.20848	1.31906	0.122651	1.48205	0.0334663
	FA 22:2	0.989146	0.883278	1.17232	0.316363	0.720582	0.0751685	0.928332	0.488799	1.34052	0.0496037
	FA 22:5	1.29713	0.143533	1.5957	0.0946903	0.928799	0.630134	1.08322	0.606478	1.75975	0.00396587
	MG 16:0	1.44165	0.226153	1.55404	0.169442	1.1787	0.433297	1.03294	0.853044	1.5043	0.0112678
	PE 39:6|PE 17:0_22:6	1.08993	0.391857	0.944063	0.615315	1.12079	0.142466	1.19262	0.0655891	1.58679	0.00978127
	TG 54:1|TG 16:0_18:0_20:1	0.922059	0.789022	0.980996	0.940916	0.645263	0.221866	0.860755	0.529528	2.13004	0.00205085
	TG 54:2|TG 18:0_18:1_18:1	0.771537	0.151355	0.858608	0.330378	0.749588	0.155805	0.882978	0.235482	1.24192	0.0488846
↓	HexCer 36:2;3O|HexCer 18:2;2O/18:0;O	0.944995	0.695757	0.724143	0.145285	0.950493	0.754419	0.929287	0.634614	0.613964	0.00895379
	LPE O-16:1	1.27329	0.135166	0.76285	0.384333	0.962583	0.831666	0.782672	0.165028	0.604565	0.0453407
	LPE O-18:1	1.16799	0.13471	0.707608	0.193634	0.981554	0.903568	0.861042	0.34573	0.682173	0.0462826
	PC 28:6	0.885759	0.680043	0.705648	0.14188	0.79105	0.371148	0.635383	0.0760343	0.461643	0.0116528
	PC 30:1|PC 14:0_16:1	1.06405	0.83045	0.671345	0.218316	0.668065	0.157853	0.586781	0.0767732	0.418068	0.0266237
	PC 33:2|PC 15:0_18:2	0.741343	0.0683708	0.643271	0.0586317	0.832925	0.19664	0.841812	0.281929	0.716811	0.0490047
	PC 34:4|PC 14:0_20:4	1.24315	0.23819	0.802107	0.246576	0.941555	0.627781	0.884874	0.321133	0.625694	0.0100799
	PC 37:2|PC 19:0_18:2	1.08873	0.575799	0.81973	0.274982	0.922546	0.504571	1.00224	0.985005	0.608413	0.00961537
	PC 39:4|PC 19:0_20:4	1.32854	0.19254	1.05984	0.700396	1.01038	0.876015	0.959494	0.550407	0.56975	0.000966769
	PC 41:6	0.864188	0.301823	0.917252	0.592303	0.956091	0.716067	1.07643	0.552267	0.685919	0.0148145
	PC O-29:1	1.18649	0.179982	1.19389	0.18598	1.18908	0.0859099	1.0231	0.844094	0.644254	0.0139731
	PC O-32:0	1.11131	0.39758	1.01513	0.904203	1.06009	0.615082	0.865232	0.244351	0.636293	0.0120031
	PC O-32:1	1.01952	0.837947	0.942192	0.581439	0.883991	0.224689	0.843904	0.107195	0.534172	0.00294215
	PC O-40:1	0.995618	0.954062	0.877582	0.407051	1.02032	0.819191	0.976832	0.827328	0.639655	0.00216767
	PE 32:2|PE 16:1_16:1	1.78708	0.201916	0.893914	0.719142	1.2392	0.425288	1.04355	0.875664	0.194934	0.0144822
	PE 34:3|PE 16:1_18:2	1.61271	0.179791	0.935218	0.761495	1.31121	0.156693	1.10689	0.624221	0.281778	0.00393119
	PE 34:4|PE 16:1_18:3	1.63592	0.160262	0.98469	0.954595	1.05916	0.796152	0.933884	0.807328	0.298106	0.013683
	PE 36:6|PE 14:0_22:6	1.11392	0.677519	0.841738	0.477602	0.692668	0.125552	0.569703	0.0513721	0.318911	0.00835253
	PE 37:5;2O|PE 20:4_17:1;2O	0.992969	0.956247	0.596559	0.110019	0.863171	0.343528	0.750991	0.0817812	0.587746	0.042997
	PE 38:5|PE 18:1_20:4	0.848859	0.197214	0.826167	0.234714	0.806835	0.136564	0.800582	0.0946524	0.643378	0.0121476
	PE P-36:4|PE P-16:0_20:4	0.844929	0.314345	0.706205	0.10188	0.795608	0.21398	0.817858	0.233168	0.541793	0.0113481
	PE P-38:4|PE P-16:0_22:4	1.07215	0.370626	0.858973	0.303471	1.11179	0.211763	1.05881	0.486661	0.810051	0.0441921
	PE P-38:4|PE P-18:0_20:4	1.07128	0.374381	0.859631	0.303314	1.11131	0.212577	1.05822	0.488926	0.80951	0.0432714
	PS 44:12|PS 22:6_22:6	0.790547	0.633077	0.327729	0.064509	0.644639	0.162664	0.531287	0.103724	0.366201	0.0313199
	SM 31:1;2O	1.26395	0.314393	0.748119	0.40106	0.92208	0.719337	0.637495	0.12255	0.437315	0.0321298
	SM 33:1;2O|SM 17:1;2O/16:0	1.13403	0.285184	0.863982	0.410473	1.04091	0.736133	0.954555	0.743117	0.612385	0.0174819
	SM 34:0;2O	0.831059	0.152649	0.865515	0.345383	0.884226	0.386799	0.931638	0.541928	0.648572	0.0141073
	SM 34:1;2O	0.866232	0.194603	0.879243	0.365299	0.883762	0.329168	0.945422	0.589978	0.638065	0.00751466
	SM 34:1;3O	0.899655	0.508552	0.968131	0.902942	0.763669	0.216046	0.803518	0.25025	0.538605	0.0188626
	SM 41:3;2O	1.13958	0.507688	0.954567	0.797357	1.08258	0.429143	1.01749	0.861979	0.654512	0.0124353
	SM 42:4;2O	0.868091	0.446298	0.892058	0.457093	0.983533	0.927902	0.888588	0.408841	0.619276	0.0182577
